# Supplementary material for: Spatiotemporal single cell analyses reveal a transient population of retinal progenitor cells in the ciliary margin of developing human retina
Source: Research Square preprint supplement (doi:10.21203/rs.3.rs-3160527/v1), 2023-07-13
Supplement: Supplementary file 1 [file 210a6a4572cbbe60da886032.xlsx]

## Sheet: RPCs
Upstream Regulator	Molecule Type	Predicted Activation State	Activation z-score	p-value of overlap	Target Molecules in Dataset	Mechanistic Network
Tgf beta	group	Activated	3.635	3.85e-17	ATOH7,BAMBI,BNIP3,CCN1,CCND1,FOS,HES1,HES6,ID1,ID3,JUN,JUNB,NEUROD1,NEUROD4,NR4A1,PMEPA1,PTF1A,SOX4,SPP1,VIM	59 (20)
VEGFA	growth factor	Activated	3.371	3.12e-10	CCN1,CCND1,EGR1,FOS,FOSB,HES1,ID1,ID3,JUNB,KDR,NR4A1,SPP1	50 (24)
IGF1	growth factor	Activated	3.189	2.33e-16	CCN1,CCND1,CCNG2,DUSP1,EGR1,FOS,FOSB,GADD45A,GADD45G,ID1,JUN,JUNB,NR4A1,PLP1,PTTG1,SOX2,SPP1,TF,VIM,ZFP36L1,ZFP36L2	48 (23)
F2R	G-protein coupled receptor	Activated	3.112	1.09e-12	CCN1,CCND1,CD24,DUSP1,EGR1,FOS,KDR,MCAM,NR4A1,VIM	49 (21)
HGF	growth factor	Activated	3.082	5.64e-12	CCN1,CCND1,CCNG2,DUSP1,EGR1,FOS,FOSB,HES1,ID1,JUN,JUNB,NR4A1,PTTG1,SOX2,SPP1,VIM	43 (21)
Vegf	group	Activated	3.056	6.79e-06	CCN1,EGR1,FOS,FOSB,HES1,ID1,JUN,KDR,NR4A1,VIM	50 (22)
EDN1	cytokine	Activated	2.978	2.29e-08	CCN1,CCND1,EGR1,FOS,FOSB,JUN,JUNB,MCAM,VIM	50 (20)
CREB1	transcription regulator	Activated	2.924	1.67e-14	BNIP3,CCN1,CCND1,CSRP2,DUSP1,EGR1,FOS,FOSB,GADD45A,GADD45G,ID1,JUN,JUNB,MCAM,NEUROD1,NR4A1,SAT1,TF,VIM	45 (18)
LEP	growth factor	Activated	2.915	8.56e-08	CCN1,CCND1,EGR1,FOS,GADD45A,HES1,JUN,JUNB,KDR,PLP1,SPP1,VIM	50 (24)
AGT	growth factor	Activated	2.913	7.15e-09	CCND1,CSRP2,DUSP1,EGR1,FOS,HES1,ID3,JUN,KDR,LUM,MYBL1,NR4A1,PTF1A,SFRP2,SOX4,SPP1,VIM	53 (23)
NPM1	transcription regulator	Activated	2.828	5.32e-08	BAMBI,CCN1,EGR1,JUN,JUNB,NR4A1,PMEPA1,ZFP36L1	41 (7)
PRL	cytokine	Activated	2.82	6.03e-09	CCND1,EGR1,FOS,HES1,ID1,ID3,JUN,RASD1,SFRP2,SPP1,VIM	46 (23)
EPHA2	kinase	Activated	2.795	1.17e-12	DUSP1,EGR1,FOS,FOSB,JUN,JUNB,NR4A1,SOX2	42 (21)
CXCL12	cytokine	Activated	2.754	1.43e-09	CCND1,EGR1,FOS,HES1,ID1,JUN,JUNB,NR4A1,TF,VIM	48 (20)
SRC	kinase	Activated	2.748	8.12e-09	CCND1,DUSP1,FOS,ID1,JUN,NEUROD1,SPP1,VIM	42 (21)
INS	other	Activated	2.747	1.85e-10	CCN1,CCND1,DUSP1,EGR1,FOS,FOSB,JUN,JUNB,NR4A1,SOX9	42 (20)
IL1A	cytokine	Activated	2.745	1.49e-06	CCN1,FOS,FOSB,JUN,JUNB,MCAM,SPP1,VIM	44 (23)
Insulin	group	Activated	2.702	3.65e-07	CCND1,CCNG2,DUSP1,EGR1,FOS,FOSB,HES1,JUN,JUNB,NR4A1,SYP,TF,VIM	47 (21)
Pkc(s)	group	Activated	2.675	3.55e-08	CCN1,DUSP1,EGR1,FOS,GADD45A,JUN,JUNB,NR4A1,SPP1	48 (25)
IL1B	cytokine	Activated	2.611	7.49e-11	BAMBI,CCND1,DUSP1,EGR1,FOS,FOSB,GADD45A,HES1,ID3,JUN,JUNB,KDR,NEUROD1,NR4A1,RGS16,SAT1,SOX2,SOX9,SPP1,STMN2,VIM	48 (22)
TNF	cytokine	Activated	2.602	3.58e-12	BAMBI,CCN1,CCND1,DUSP1,EGR1,FOS,FOSB,GADD45A,GADD45G,HES1,ID1,ID3,JUN,JUNB,KDR,MCAM,NEUROD1,NR4A1,PLP1,RASD1,RBP1,RGS16,SAT1,SOX2,SOX4,SOX9,SPP1,TF,VIM	48 (23)
EP300	transcription regulator	Activated	2.599	2.65e-10	CCND1,CCNG2,DUSP1,EGR1,FOS,HES6,ID1,ID3,JUN,KDR,NR4A1,RBP1,SOX2,ZFP36L2	50 (22)
EGF	growth factor	Activated	2.599	8.17e-22	CCN1,CCND1,DUSP1,EGR1,FABP7,FOS,FOSB,GADD45A,GAS1,HES1,ID1,JUN,JUNB,NEUROD1,NR4A1,PTF1A,PTTG1,SFRP2,SOX2,SOX4,SOX9,SPP1,SYP,TF,VIM,ZFP36L2	47 (21)
TGFBR2	kinase	Activated	2.598	4.66e-05	CCND1,EGR1,GADD45G,ID1,ID3,JUN,KDR,SPP1	49 (26)
MAPK3	kinase	Activated	2.586	1.7e-09	CCND1,EGR1,FOS,FOSB,JUN,JUNB,NR4A1,SPP1	39 (17)
Growth hormone	group	Activated	2.579	8.89e-08	CCND1,EGR1,FOS,HES1,ID1,JUN,JUNB,SPP1,TF	48 (23)
F2	peptidase	Activated	2.577	7.99e-11	CCN1,CCND1,DUSP1,EGR1,FOS,FOSB,JUN,JUNB,KDR,SYP,TAGLN3,UBE2S	50 (21)
FGF2	growth factor	Activated	2.57	8e-22	BAMBI,BNIP3,CCN1,CCND1,CCNG2,EGR1,FOS,GADD45A,HES1,ID3,JUN,JUNB,KDR,MCAM,NEUROD1,NR4A1,PTF1A,PTTG1,SFRP2,SOX2,SOX9,SPP1,TF,VIM	52 (23)
CSF1	cytokine	Activated	2.56	0.000158	CCND1,DUSP1,EGR1,FOS,JUN,JUNB,SPP1	47 (20)
ELK1	transcription regulator	Activated	2.54	5.52e-09	EGR1,FOS,FOSB,JUN,JUNB,NR4A1,SPP1	48 (22)
ERK	group	Activated	2.47	1.02e-07	CCND1,DUSP1,EGR1,FOS,JUN,JUNB,MCAM,SOX4,ZFP36L1	48 (20)
MAPK1	kinase	Activated	2.454	3.76e-09	CCND1,DUSP1,EGR1,FOS,FOSB,JUN,JUNB,NR4A1,RGS16,SFRP2,SPP1,VIM	44 (20)
GLI3	transcription regulator	Activated	2.449	2.95e-08	CCND1,DLL3,DUSP1,EGR1,FOSB,JUNB,SOX9
cytokine	group	Activated	2.449	1.02e-05	CCN1,CCND1,DUSP1,EGR1,FOS,JUN	49 (24)
Pdgf (complex)	complex	Activated	2.431	8.49e-07	CCND1,EGR1,FOS,FOSB,JUN,JUNB	41 (20)
MYD88	other	Activated	2.425	1.22e-05	BAMBI,CCN1,DUSP1,EGR1,FOS,JUN,SOX9,SPP1	51 (21)
IFNG	cytokine	Activated	2.402	0.000482	AMER2,CCND1,DUSP1,EGR1,FOS,FOSB,HES1,ID1,JUN,JUNB,KDR,NEUROD1,SPP1,VIM	49 (21)
LIF	cytokine	Activated	2.398	5e-08	CCND1,EGR1,FOS,HES1,JUN,JUNB,KDR,SOX2,SPP1	38 (21)
MAP2K1/2	group	Activated	2.395	1.97e-07	CCND1,DUSP1,EGR1,FOS,JUN,VIM	43 (21)
SNAI2	transcription regulator	Activated	2.39	4.58e-07	CCN1,CCND1,HES6,SOX2,SOX9,VIM	41 (17)
RAF1	kinase	Activated	2.38	7.3e-05	CCND1,EGR1,FOS,ID3,JUN,ZFP36L2	46 (24)
HMGA1	transcription regulator	Activated	2.378	8.35e-09	CCN1,CCND1,EGR1,FOS,ID3,JUNB,SOX2,SOX4,VIM	49 (24)
FN1	enzyme	Activated	2.378	5.63e-06	CCN1,CCND1,FOS,SOX2,SOX9,SPP1,VIM	44 (19)
BMP7	growth factor	Activated	2.363	1.01e-05	CSRP2,DUSP1,ID1,ID3,PMEPA1,SPP1,VIM	32 (10)
miR-6967-5p (and other miRNAs w/seed AGGGAGG)	mature microRNA	Activated	2.345	0.00274	ATOH7,FAM131C,HES4,HES6,MLLT11,SH3BGRL3,SRRM4,SYP,UBE2S
MET	kinase	Activated	2.326	6.18e-06	CCND1,FOS,JUN,SOX2,SPP1,VIM	49 (22)
CG	complex	Activated	2.321	2.76e-09	BAMBI,CCND1,CD24,DUSP1,EGR1,FOS,GAS1,JUN,JUNB,MCAM,NR4A1,RASD1,SFRP2,SPP1	45 (21)
PTH	other	Activated	2.309	1.05e-07	CCND1,DUSP1,FOS,FOSB,JUN,NR4A1,SFRP2,SPP1	42 (23)
JUN	transcription regulator	Activated	2.275	7.3e-11	CCN1,CCND1,DUSP1,FABP7,FOS,GADD45A,HES1,JUN,JUNB,KDR,NR4A1,SOX2,SPP1,TF,VIM	51 (21)
TGFB1	growth factor	Activated	2.243	2.1e-12	AMER2,BAMBI,CCN1,CCND1,CCNG2,CSRP2,DLL3,DUSP1,EGR1,FOS,FOSB,GADD45A,GAS1,HES1,ID1,ID3,JUN,JUNB,KDR,MYBL1,NR4A1,PMEPA1,SOX2,SOX4,SOX9,SPP1,SYP,VIM,ZFP36L2	51 (19)
APEX1	enzyme	Activated	2.236	5.38e-08	EGR1,FOS,FOSB,JUNB,NR4A1	38 (12)
DDB1	other	Activated	2.236	4.55e-08	CCN1,EGR1,FOS,ID3,NR4A1
GNRH1	other	Activated	2.224	2.03e-06	EGR1,FOS,FOSB,JUN,JUNB	39 (20)
Mek	group	Activated	2.22	1.27e-08	CCND1,EGR1,FOS,GPM6B,ID1,JUN,JUNB,KDR,NR4A1,OTX2,VIM	43 (24)
POMC	other	Activated	2.215	1.78e-05	DUSP1,FOS,JUN,JUNB,NR4A1	42 (18)
ETS2	transcription regulator	Activated	2.213	4.14e-06	FOS,JUN,JUNB,SOX2,SPP1	47 (18)
TGFB3	growth factor	Activated	2.213	3.93e-05	CCN1,FOS,FOSB,JUN,SOX9	44 (19)
CCN1	other	Activated	2.213	9.63e-06	CCN1,CCND1,JUN,KDR,NR4A1	49 (22)
Jnk	group	Activated	2.212	2.04e-09	CCND1,DUSP1,EGR1,FOS,FOSB,GADD45A,HES1,JUN,NR4A1,RBP1	53 (22)
Hedgehog	group	Activated	2.207	2.24e-10	CCND1,GAS1,HES1,NEUROD1,SOX2,SOX9,SPP1
FGFR1	kinase	Activated	2.205	3.24e-06	CCND1,FOS,HES1,JUN,PLP1,VIM	48 (25)
TCF	group	Activated	2.204	4.89e-07	CCND1,EGR1,FOS,ID3,JUNB,SOX9	42 (15)
BMP10	growth factor	Activated	2.2	1.26e-05	FOS,ID1,ID3,NR4A1,SOX9	5 (2)
CD3	complex	Activated	2.2	0.00096	BAMBI,CCND1,FOS,ID3,JUN,JUNB,NR4A1,ZFP36L1	47 (19)
IPMK	kinase	Activated	2.191	1.15e-06	CCN1,FOS,FOSB,JUN,JUNB	45 (15)
Mapk	group	Activated	2.19	1.33e-06	CCND1,EGR1,FOS,JUN,JUNB,SPP1	48 (21)
PDGFB	growth factor	Activated	2.189	2.94e-06	CCND1,EGR1,FOS,NR4A1,SPP1	40 (20)
IGF1R	transmembrane receptor	Activated	2.183	0.000541	CCND1,EGR1,FOS,NR4A1,SPP1,ZFP36L2	39 (18)
PTGS2	enzyme	Activated	2.183	0.000943	CCND1,DUSP1,EGR1,FOS,KDR	46 (21)
MAP2K5	kinase	Activated	2.182	6.61e-07	CCND1,FOS,ID1,JUN,NR4A1	37 (17)
IL1	group	Activated	2.178	0.00544	DUSP1,EGR1,FOS,JUN,SOX9	41 (22)
MYB	transcription regulator	Activated	2.176	2.96e-05	CCND1,JUN,KDR,SOX2,SPP1,VIM	52 (22)
JAK2	kinase	Activated	2.172	6.96e-07	CCND1,EGR1,FOS,NR4A1,PCBP4,RBP1,TF	48 (25)
TRH	other	Activated	2.169	1.51e-07	DUSP1,FOS,JUN,JUNB,NR4A1	47 (19)
MAP3K8	kinase	Activated	2.157	0.000151	EGR1,FOS,JUN,JUNB,NR4A1	42 (20)
MAP3K1	kinase	Activated	2.156	8e-07	CCND1,DUSP1,EGR1,FOS,JUN	46 (21)
CD44	other	Activated	2.149	1.14e-06	CCND1,GADD45A,JUN,PMEPA1,SFRP2,SOX2,SPP1,VIM	49 (20)
PDGF BB	complex	Activated	2.138	9.14e-16	CCN1,CCND1,CSRP2,DUSP1,EGR1,FOS,FOSB,GADD45A,HES1,ID3,JUN,JUNB,NR4A1,PRSS35,RBP1,SAT1,ZFP36L1	48 (25)
EGFR	kinase	Activated	2.135	2.62e-12	CCND1,CCNG2,DUSP1,EGR1,FABP7,FOS,GADD45A,GPM6B,ID1,INSM1,JUN,JUNB,MCAM,SOX2,SOX9,UBE2S,VIM	49 (23)
CSF2	cytokine	Activated	2.113	7.74e-06	CCND1,CD24,EGR1,FOS,ID3,JUN,JUNB,NR4A1,SPP1,TF	41 (21)
STAT3	transcription regulator	Activated	2.11	5.19e-12	CCND1,DUSP1,EGR1,FOS,GADD45A,GADD45G,ID1,ID3,JUN,JUNB,KDR,NR4A1,OTX2,PTTG1,SOX11,SOX2,SOX4,SPP1,VIM	51 (24)
STAT5B	transcription regulator	Activated	2.098	2.15e-05	CCND1,DUSP1,FAM89A,FOS,GADD45A,JUN,RASD1,TF	50 (20)
TCR	complex	Activated	2.08	3.34e-06	CCND1,EGR1,FOS,GADD45G,ID3,JUN,JUNB,NR4A1,SPP1	47 (21)
Creb	group	Activated	2.076	3.15e-13	CCN1,CCND1,DUSP1,EGR1,FOS,FOSB,HES1,JUN,JUNB,MCAM,NR4A1,NRL,SOX4,SOX9,TF	41 (15)
IL6	cytokine	Activated	2.066	1.06e-10	BAMBI,CCND1,DUSP1,EGR1,FOS,GADD45A,GADD45G,ID1,JUN,JUNB,KDR,PTTG1,SOX2,SOX4,SPP1,SYP,TF,VIM	45 (20)
CTNNB1	transcription regulator	Activated	2.053	5.39e-11	BAMBI,CCN1,CCND1,EGR1,FOS,GADD45G,HES1,ID1,ID3,JUN,KDR,NEUROD1,NR4A1,PRSS35,SOX11,SOX2,SOX4,SOX9,SPP1,VIM	52 (24)
Akt	group	Activated	2.005	5.89e-09	CCND1,FOS,GPM6B,HES1,JUN,MCAM,RASD1,SOX2,SOX4,SOX9,SPP1,VIM	52 (22)
RELA	transcription regulator	Activated	2.003	4.37e-09	CCND1,DUSP1,EGR1,FOS,FOSB,HES1,ID1,JUN,JUNB,LUM,NR4A1,SOX9,VIM	54 (21)
NORAD	other	Activated	2	8.76e-06	CCN1,ID3,JUN,JUNB
WWTR1	transcription regulator	Activated	2	9.74e-05	CCN1,CCND1,HES1,KDR,SPP1
NFATC3	transcription regulator	Activated	2	6.6e-05	FOS,FOSB,JUN,NR4A1
miR-3189-3p (miRNAs w/seed CCUUGGG)	mature microRNA	Activated	2	0.00535	RBP1,SRRM4,SYP,VXN
miR-1894-5p (miRNAs w/seed UCUCCCC)	mature microRNA	Activated	2	0.0143	ATOH7,NRL,RGS16,SOX11
FGFR3	kinase	Activated	2	4.73e-09	CCND1,FOS,HES1,SOX9,SPP1,VIM	52 (24)
TNFSF13B	cytokine	Activated	2	0.00132	ID1,JUN,SOX11,SPP1
miR-939-3p (miRNAs w/seed CCUGGGC)	mature microRNA	Activated	2	0.0764	ATOH7,ATP1A3,MFNG,RGS16
miR-6738-3p (miRNAs w/seed UUCUGCC)	mature microRNA	Activated	2	0.00163	CCNG2,HES6,MYBL1,PCBP4
AKT1	kinase		1.999	5.16e-07	CCND1,EGR1,FOS,FOSB,KDR,PLP1,SOX2,SPP1,VIM	47 (22)
RPS6KA5	kinase		1.999	6.63e-07	DUSP1,FOS,JUN,JUNB	47 (20)
LIN28A	other		1.998	2.11e-05	CCN1,CCND1,SOX2,VIM	43 (11)
REST	transcription regulator		1.994	0.000195	NEUROD1,SCG3,SRRM4,STMN2,SYP
RPS6KA4	kinase		1.992	6.62e-08	DUSP1,FOS,JUN,JUNB	42 (22)
CREBBP	transcription regulator		1.987	7.01e-07	CCN1,CCND1,DUSP1,EGR1,FOS,FOSB,JUN,NEUROD1,NR4A1,ZFP36L2	45 (18)
NR4A1	ligand-dependent nuclear receptor		1.987	0.00266	CCND1,ID1,NEUROD1,NR4A1,SAT1	45 (7)
EDN3	other		1.982	5.44e-07	CCND1,EGR1,FOS,MCAM	48 (23)
HDAC2	transcription regulator		1.982	1.36e-05	CCND1,CCNG2,EGR1,SOX11,SOX9,STMN2
LEPR	transmembrane receptor		1.982	0.00376	FOS,GADD45G,PLP1,SOX2
SMAD3	transcription regulator		1.982	2.72e-12	CCND1,CCNG2,EGR1,FOS,ID1,ID3,JUN,JUNB,LUM,PMEPA1,SOX2,SPP1,TF,VIM	49 (25)
CHRM1	G-protein coupled receptor		1.981	6.62e-08	CCN1,EGR1,FOS,JUN	45 (20)
JAK1	kinase		1.98	0.000102	FOS,ID1,JUNB,TF	31 (8)
FHL2	transcription regulator		1.98	3.52e-05	CCND1,JUN,SOX9,SPP1	46 (24)
MST1R	kinase		1.98	2.44e-06	CCND1,FOS,JUN,VIM	50 (23)
Pka	complex		1.977	3.7e-07	DUSP1,EGR1,FOS,JUN,JUNB,NR4A1,SOX9	41 (16)
THPO	cytokine		1.969	0.00033	CCND1,FOS,KDR,SOX2	45 (24)
ETS1	transcription regulator		1.969	0.000107	CCND1,EGR1,JUNB,MCAM,SPP1,VIM	49 (27)
AREG	growth factor		1.96	0.000205	CCND1,EGR1,FOS,JUN	40 (20)
SERPINE1	other		1.96	6.69e-07	DUSP1,EGR1,FOS,JUNB,SYP,VIM	43 (21)
GRP	growth factor		1.959	2.12e-06	CCND1,FOS,FOSB,JUN	40 (24)
Il3	cytokine		1.958	0.000102	EGR1,FOS,SOX9,SPP1	41 (23)
ERG	transcription regulator		1.954	2.9e-05	CADPS,FOSB,GADD45A,SOX4,SOX9,SPP1,VIM	37 (7)
RUNX2	transcription regulator		1.951	0.000771	CCND1,LUM,SOX9,SPP1
STAT5A	transcription regulator		1.951	4.23e-05	CCND1,CD24,FOS,FOSB,GADD45A,GADD45G,ID1	47 (21)
EPHB1	kinase		1.948	3.07e-08	EGR1,FOS,JUN,JUNB	42 (21)
NRG1	growth factor		1.947	1.48e-17	BNIP3,CCN1,CCND1,DUSP1,EGR1,FOS,FOSB,HES1,ID1,JUN,JUNB,NR4A1,SOX2,SOX4,TF,VIM,ZFP36L2	45 (22)
BMP4	growth factor		1.946	4.53e-09	CCN1,CCND1,HES1,ID1,ID3,JUN,JUNB,KDR,SOX2,SOX9	41 (24)
CAMK4	kinase		1.944	1.52e-05	FOS,FOSB,JUN,JUNB	45 (18)
CXCR4	G-protein coupled receptor		1.941	6.99e-05	CCND1,EGR1,ID1,JUNB	47 (21)
PRKCE	kinase		1.941	6.04e-09	CCN1,CCND1,EGR1,FOS,JUN,JUNB,SYP	47 (20)
HRAS	enzyme		1.94	5.85e-13	ATP1A3,BNIP3,CCN1,CCND1,CD24,CSRP2,DUSP1,EGR1,FOS,FOSB,GADD45G,HES1,JUN,JUNB,MCAM,PMEPA1,SOX4,SPP1,VIM	51 (23)
JAG1	growth factor		1.937	3.8e-09	CCND1,DUSP1,GADD45A,HES1,SOX2,SPP1,VIM	45 (15)
GAST	other		1.936	8.14e-06	CCND1,EGR1,FOS,HES1,JUN	43 (22)
FGF8	growth factor		1.923	0.000242	CCND1,OTX2,RASD1,SPP1
CD28	transmembrane receptor		1.896	0.0274	CCND1,FOS,JUN,NR4A1
GPER1	G-protein coupled receptor		1.894	1.07e-14	CCN1,CCND1,DUSP1,EGR1,FOS,FOSB,JUN,RASD1,RGS16,SFRP2	44 (20)
FSH	complex		1.873	7.49e-07	CCND1,DUSP1,FOS,FOSB,ID1,JUN,JUNB,NR4A1,RGS16,TF	47 (19)
ID1	transcription regulator		1.809	1.56e-07	CCND1,EGR1,NEUROD1,SOX2,TF,VIM	51 (23)
FGF1	growth factor		1.794	3.35e-10	CCN1,CCND1,EGR1,FOS,GADD45G,JUN,PMEPA1,SOX2,SPP1	42 (23)
YAP1	transcription regulator		1.773	8.39e-06	CCN1,CCND1,EGR1,FOS,GADD45A,ID1,PMEPA1,SOX2,SOX9,VIM	44 (22)
FOXM1	transcription regulator		1.772	1.34e-06	CCND1,FOS,JUN,KDR,PTTG1,SOX2,VIM	48 (24)
MAPK8	kinase		1.767	2.01e-06	CCND1,DUSP1,EGR1,FOS,GADD45A,JUN,RBP1	42 (21)
PI3K (complex)	complex		1.766	4.62e-07	CCND1,CCNG2,DUSP1,FOS,JUN,KDR,MCAM,SOX9,SPP1	48 (26)
NGF	growth factor		1.765	4.59e-11	BAMBI,CCND1,DUSP1,EGR1,FOS,GADD45A,GADD45G,ID1,ID3,JUN,JUNB,NR4A1	52 (21)
APP	other		1.764	8.84e-08	ATP1A3,CCND1,CCNG2,EGR1,FOS,FOSB,GPM6B,HES1,JUN,JUNB,NEUROD1,QDPR,SOX9,STMN2,SYP,ZFP36L1	45 (22)
miR-3103-5p (and other miRNAs w/seed GAGGGAG)	mature microRNA		1.744	0.00498	ATP1A3,FAM131C,FOSB,HES6,MFNG,SH3BGRL3,SYP,VXN,ZFP36L1
AHR	ligand-dependent nuclear receptor		1.738	1.25e-09	CCND1,CCNG2,FOS,GADD45A,GAS1,HES1,JUN,JUNB,MCAM,RBP1,SOX2,SOX9,SPP1,VIM	56 (24)
TCF7L2	transcription regulator		1.736	1.22e-09	BAMBI,CCND1,CD24,FOS,ID1,ID3,JUN,MCAM,PLP1,SOX2,SOX9,SPP1,VIM	52 (25)
TGM2	enzyme		1.732	0.00664	BNIP3,CCND1,ID1,SPP1	42 (11)
TFEB	transcription regulator		1.725	0.000427	CCND1,FOS,JUN,PTTG1,SPP1,VIM	37 (8)
THRA	ligand-dependent nuclear receptor		1.722	0.00023	CCND1,FOS,JUN,PTTG1,SFRP2	46 (23)
NR5A2	ligand-dependent nuclear receptor		1.715	4.06e-06	CCND1,FOS,GADD45G,JUN,JUNB,NR4A1	46 (20)
OSM	cytokine		1.704	5.51e-11	BAMBI,CCND1,CCNG2,CD24,EGR1,FOS,FOSB,GADD45G,ID1,JUN,JUNB,MLLT11,RASD1,SFRP2,SPP1,VIM	48 (20)
Fgf	group		1.694	8.81e-10	CCND1,FOS,JUN,JUNB,KDR,OTX2	44 (22)
RAC1	enzyme		1.687	3.71e-06	CCND1,DUSP1,FOS,JUN,SOX2,SOX9	47 (26)
MEF2D	transcription regulator		1.673	4.59e-09	CCND1,FOS,FOSB,JUN,JUNB,NR4A1,VIM	36 (7)
REL	transcription regulator		1.671	1.32e-05	CCND1,FOS,JUN,KDR,NR4A1,PCBP4,VIM	48 (20)
CALCA	other		1.667	0.00257	FOS,JUNB,KDR,NR4A1	34 (11)
WNT3A	cytokine		1.664	1.39e-09	CCN1,CCND1,GADD45G,GAS1,ID1,JUN,KDR,PMEPA1,SFRP2,SOX4,SOX9,VIM	51 (19)
MAPK7	kinase		1.619	1.19e-08	CCN1,CCND1,DUSP1,ID1,JUN,NR4A1,VIM	43 (23)
ERK1/2	group		1.616	1.89e-11	ATP1A3,CCND1,DUSP1,EGR1,FOS,FOSB,ID1,ID3,JUN,JUNB,SOX2,SOX9,SPP1	46 (23)
MAP2K1	kinase		1.608	8.06e-07	CCN1,CCND1,DUSP1,EGR1,FOS,JUN,PLP1,SOX9	45 (18)
EGR1	transcription regulator		1.6	1.2e-08	CCND1,EGR1,GADD45A,ID1,JUN,JUNB,MYBL1,NR4A1,SPP1	50 (20)
AR	ligand-dependent nuclear receptor		1.599	6.18e-07	ATP1A3,CCND1,DAPL1,EGR1,FABP7,GADD45G,KPNA2,PLP1,PMEPA1,SOX9,SPP1,TF,VIM	50 (20)
NFkB (complex)	complex		1.571	1.65e-08	BAMBI,CCN1,CCND1,EGR1,FOS,GADD45A,JUN,JUNB,KDR,MYBL1,RGS16,SFRP2,SPP1,VIM	51 (21)
RAS	group		1.561	4.24e-06	BNIP3,CCND1,EGR1,FOS,JUN,VIM	46 (25)
NOTCH1	transcription regulator		1.551	1.25e-10	CCN1,CCND1,FABP7,FOS,FOSB,HES1,ID1,MCAM,NEUROD1,SOX2,SPP1,SYP	54 (25)
EPO	cytokine		1.546	3.93e-09	CCNG2,EGR1,FOS,FOSB,ID1,JUN,JUNB,KPNA2,SPP1,SYP,TF	45 (23)
ERBB2	kinase		1.539	4.32e-09	BNIP3,CCND1,EGR1,FOS,GPM6B,H4C3,HES1,ID1,JUN,JUNB,KDR,LUM,MFNG,MYBL1,PMEPA1,SOX4,VIM,ZFP36L2	50 (21)
SRF	transcription regulator		1.537	2.45e-08	CSRP2,EGR1,FOS,FOSB,GADD45A,GADD45G,HES6,JUN,JUNB,KDR,NR4A1	33 (9)
SMARCA4	transcription regulator		1.535	2.45e-08	BAMBI,CCND1,EGR1,FOS,GADD45A,GADD45G,ID3,JUN,KDR,LUM,RBP1,SOX2,SPP1,VIM	51 (24)
P38 MAPK	group		1.528	3.07e-09	BNIP3,CCND1,CCNG2,DUSP1,EGR1,FOS,ID3,JUN,JUNB,NR4A1,RBP1,SPP1	47 (20)
GNRH	group		1.513	1.32e-07	DUSP1,EGR1,FOS,JUN,SCG3	48 (19)
Lh	complex		1.51	1.56e-05	DUSP1,EGR1,FOS,GADD45G,JUN,JUNB,NR4A1,RGS16	43 (20)
PSEN1	peptidase		1.483	5.56e-08	ATP1A3,CCND1,DLL3,DUSP1,EGR1,FOS,GPM6B,HES1,QDPR,STMN2,SYP	50 (19)
F7	peptidase		1.455	1.96e-07	CCN1,CCND1,EGR1,FOS,GADD45A	51 (20)
CD40LG	cytokine		1.45	5.42e-09	BNIP3,CCNG2,DUSP1,EGR1,FOS,FOSB,GADD45A,GATB,ID3,JUN,JUNB,ZFP36L1	43 (20)
BMP2	growth factor		1.45	2.88e-09	CCND1,FOS,FOSB,ID1,ID3,JUN,JUNB,SOX2,SOX9,SPP1	46 (22)
TGFA	growth factor		1.436	2.65e-07	CCND1,FOS,JUNB,PTTG1,SOX9,VIM	43 (22)
VDR	transcription regulator		1.429	2.35e-05	CCND1,EGR1,GADD45A,GADD45G,ID1,JUN,SPP1	47 (23)
SOX9	transcription regulator		1.406	6.45e-05	FOS,HES1,SOX2,SOX4,SOX9	34 (9)
GATA1	transcription regulator		1.406	0.000358	CCND1,EGR1,FOSB,INSM1,JUNB,KDR
BCR (complex)	complex		1.39	0.000465	CCND1,CCNG2,EGR1,FOS,FOSB,JUNB	46 (22)
Ige	complex		1.387	0.00432	EGR1,JUNB,RGS16,SPP1,VIM	46 (17)
TREM1	transmembrane receptor		1.387	0.000437	EGR1,HES1,HES4,RGS16,SPP1
SPP1	cytokine		1.367	4.39e-06	CCND1,FOS,JUN,PTF1A,SOX9,SPP1,VIM	49 (22)
ATF2	transcription regulator		1.36	2.05e-08	CCND1,DUSP1,EGR1,FOS,GADD45A,JUN,TF	47 (22)
NCOA3	transcription regulator		1.358	1.87e-05	CCN1,CCND1,HES1,KDR,SOX2	33 (8)
ESR1	ligand-dependent nuclear receptor		1.354	9.1e-08	CCN1,CCND1,CCNG2,EGR1,FOS,FOSB,GADD45G,H4C3,HES1,ID1,JUN,JUNB,OTX2,PTTG1,RGS16,SOX4,SOX9,SPP1,VIM	51 (23)
GNAS	enzyme		1.353	1.14e-07	CCN1,FOS,GADD45G,NR4A1,PMEPA1,RASD1,SCG3,SPP1	8 (2)
Pkg	group		1.342	9.19e-09	EGR1,FOS,FOSB,JUN,SOX9	43 (21)
ZC3H12A	enzyme		1.342	0.000329	CSRP2,DUSP1,FOS,JUNB,ZFP36L1
MKNK1	kinase		1.342	1.62e-06	ATP1A3,CCN1,EGR1,FOS,FOSB,TF,VIM	38 (7)
miR-212-5p (miRNAs w/seed CCUUGGC)	mature microRNA		1.342	0.00653	CCN1,MIR124-1HG,RASD1,SRRM4,VXN
miR-1952 (miRNAs w/seed CUCCACC)	mature microRNA		1.342	9.42e-05	ATOH7,ATP1A3,HES6,SYP,TF
CAV1	transmembrane receptor		1.299	3.79e-08	CCND1,EGR1,FOS,ID1,KDR,NR4A1,SOX2,VIM	49 (24)
MIF	cytokine		1.293	0.00135	CCND1,DUSP1,FOS,JUN	48 (24)
ADRB	group		1.276	3.7e-07	BNIP3,CCND1,FOS,GADD45A,JUN,JUNB,NR4A1	43 (21)
LDL	complex		1.274	3.09e-07	CCND1,DUSP1,EGR1,FOS,FOSB,ID1,JUN,MIR124-1HG,NR4A1	42 (21)
EGR2	transcription regulator		1.264	0.000315	EGR1,FOS,ID3,JUN,KDR,SOX2	44 (25)
RHOA	enzyme		1.262	0.000409	CCND1,FOS,JUN,SOX9	44 (22)
MEF2C	transcription regulator		1.242	3.63e-09	FABP7,FOS,FOSB,JUN,JUNB,NR4A1,PLP1,SFRP2,VIM
MRTFA	transcription regulator		1.23	5.63e-06	CCN1,CD24,EGR1,FOS,GADD45A,GAS1,ID1	34 (7)
NTRK2	kinase		1.213	7.86e-09	CCND1,EGR1,FOS,SOX9,SPP1,SYP,VIM	53 (26)
CCN2	growth factor		1.195	1.48e-06	CCND1,EGR1,HES1,JUN,SOX2,SOX4	44 (20)
POU5F1	transcription regulator		1.184	6e-08	BNIP3,CCND1,DUSP1,GADD45A,GADD45G,ID3,PMEPA1,SOX2,SPP1,TF,VIM	32 (9)
IL13	cytokine		1.179	0.0177	EGR1,FAM162A,JUN,SOX2,SPP1
BDNF	growth factor		1.178	5.3e-11	ATP1A3,CCN1,DUSP1,EGR1,FOS,FOSB,JUN,NR4A1,PLP1,SFRP2,SPP1,SYP,VIM	46 (17)
miR-130a-3p (and other miRNAs w/seed AGUGCAA)	mature microRNA		1.172	0.00421	BNIP3,GADD45A,MYBL1,PMEPA1,RASD1
TNFSF11	cytokine		1.16	3.8e-05	CCND1,DUSP1,FOS,JUN,JUNB,RGS16,SPP1	44 (20)
TSH	complex		1.155	2.37e-06	CCND1,EGR1,FOS,JUNB,KDR	48 (22)
miR-137-3p (miRNAs w/seed UAUUGCU)	mature microRNA		1.131	0.0146	CCNG2,NEUROD1,NEUROD4,ZFP36L2
PLAU	peptidase		1.131	8.26e-05	CCN1,CCND1,KDR,VIM	41 (18)
ADCYAP1	other		1.127	6.95e-08	DLL3,EGR1,FOS,GAS1,ID3,LUM,MCAM,NEUROD1,TTYH1
HES1	transcription regulator		1.121	5.01e-08	DLL3,DUSP1,HES1,NEUROD1,PTF1A,SPP1
FGFR2	kinase		1.103	7.18e-05	CCND1,HES1,PLP1,SOX2,SPP1	44 (11)
ADRB3	G-protein coupled receptor		1.091	6.63e-07	EGR1,FOS,JUN,JUNB	44 (22)
AGTR1	G-protein coupled receptor		1.091	1.52e-05	CCND1,DUSP1,FOS,JUN	41 (22)
MIR17HG	other		1.067	0.000706	CCND1,DLL3,SOX11,SOX4
MAC	complex		1.067	2.79e-06	EGR1,RGS16,SOX9,SPP1	38 (7)
SMAD2	transcription regulator		1.067	4.09e-05	CCNG2,HES1,NEUROD1,SOX2,VIM	30 (7)
miR-374c-5p (and other miRNAs w/seed UAAUACA)	mature microRNA		1.067	0.000991	FAM162A,GADD45A,HES1,PTTG1
HDAC1	transcription regulator		1.067	1.64e-10	BAMBI,CCND1,DUSP1,EGR1,FOS,HES1,ID1,KDR,SOX11,SOX2,SOX9,SPP1	51 (26)
PELP1	other		1.067	0.00107	CCND1,CCNG2,FOS,RBP1	42 (13)
histone deacetylase	complex		1.067	8.76e-06	CCN1,CCND1,JUNB,NEUROD1
miR-504-3p (and other miRNAs w/seed GGGAGAG)	mature microRNA		1.066	0.00268	ATP1A3,DAPL1,FAM131C,FOSB,H4C3,MLLT11,SH3BGRL3,SYP,TTYH1
GDF2	growth factor		1.009	3.53e-07	BAMBI,FAM89A,FOS,ID1,ID3,SOX2,SPP1	36 (8)
STAT5a/b	group		1	0.000794	CCND1,DUSP1,FOS,RBP1	40 (18)
nicotinic acetylcholine receptor	complex		1	1.83e-06	FOS,ID1,JUN,JUNB	52 (21)
RORA	ligand-dependent nuclear receptor		1	0.00518	BNIP3,CCNG2,GADD45A,VIM
IL10RA	transmembrane receptor		1	0.0179	BNIP3,CCN1,CSRP2,LUM
miR-1934-5p (and other miRNAs w/seed CUGGUCC)	mature microRNA		1	0.037	H4C3,ID1,MFNG,RASD1
miR-669b-5p (miRNAs w/seed GUUUUGU)	mature microRNA		1	0.00478	FOS,H4C3,RASD1,STMN2
miR-328-3p (and other miRNAs w/seed UGGCCCU)	mature microRNA		1	0.0226	DAPL1,H4C3,NEUROD4,SRRM4
miR-3126-5p (and other miRNAs w/seed GAGGGAC)	mature microRNA		1	0.00588	CCND1,FAM131C,SH3BGRL3,VXN
miR-3613-3p (miRNAs w/seed CAAAAAA)	mature microRNA		1	0.00904	AMER2,SOX11,SOX4,SOX9
miR-298-5p (and other miRNAs w/seed GCAGAGG)	mature microRNA		1	0.0424	BAMBI,RGS16,SRRM4,VXN
miR-383-5p (miRNAs w/seed AGAUCAG)	mature microRNA		1	0.00057	GAS1,MLLT11,NEUROD1,OTX2
CX3CR1	G-protein coupled receptor		1	0.00257	EGR1,FOS,NEUROD1,TF
MITF	transcription regulator		1	2.08e-05	CCNG2,FOS,GPM6B,HES1,OTX2,QDPR,SOX9
RARG	ligand-dependent nuclear receptor		1	5.55e-07	DUSP1,EGR1,FOS,JUN,OTX2,SOX2	41 (7)
TAL1	transcription regulator		1	0.00597	CCNG2,JUN,RASD1,SOX4
TLR9	transmembrane receptor		1	0.00811	CCND1,DUSP1,EGR1,NR4A1	45 (22)
miR-7086-5p (miRNAs w/seed AGAGGAG)	mature microRNA		1	0.00535	AMER2,H4C3,TAGLN3,TTYH1
BAG1	other		1	2.22e-07	CCND1,FOS,GADD45A,JUN,VIM	49 (25)
GATA4	transcription regulator		0.97	1.84e-07	FOS,GAS1,HES1,ID1,JUN,OTX2,SOX9,SPP1,VIM
miR-138-5p (miRNAs w/seed GCUGGUG)	mature microRNA		0.97	0.0226	CSRP2,NEUROD1,SOX4,SRRM4,VIM,ZFP36L2
MAPK14	kinase		0.968	2.23e-09	CCND1,DUSP1,FOS,GADD45A,JUN,JUNB,KDR,SOX2,SOX9,SPP1	49 (22)
miR-4723-5p (and other miRNAs w/seed GGGGGAG)	mature microRNA		0.961	0.00253	ATP1A3,DLL3,FAM131C,FOSB,H4C3,HES4,ID1,INSM1,PMEPA1,SH3BGRL3,SOX4,SRRM4,ZFP36L1
MRTFB	transcription regulator		0.956	3.74e-05	CCN1,CD24,EGR1,GADD45A,GAS1,ID1	30 (7)
NOTCH3	transcription regulator		0.943	0.000107	FABP7,HES1,ID1,KDR
RBPJ	transcription regulator		0.936	9.82e-10	DUSP1,FOS,HES1,JUN,KDR,NEUROD1,NR4A1,SOX2,SOX4,SOX9	42 (17)
SHH	peptidase		0.922	2.18e-07	CCND1,CCNG2,ID1,NR4A1,OTX2,SFRP2,SOX9,SPP1	43 (15)
IL3	cytokine		0.914	1.44e-05	CCND1,EGR1,FOS,GADD45A,GADD45G,JUN,JUNB,SOX4	39 (20)
EPAS1	transcription regulator		0.911	1.84e-05	BNIP3,CCN1,CCND1,FOS,KDR,SOX2,SOX9	46 (20)
Notch	group		0.897	7.84e-06	DLL3,DUSP1,HES1,ID1,ID3,SOX2
PPARG	ligand-dependent nuclear receptor		0.885	0.00134	CCND1,HES1,JUN,NR4A1,SAT1,SPP1,VIM	49 (19)
CNTF	cytokine		0.882	0.000634	EGR1,FOS,JUNB,SPP1,VIM	48 (21)
ZEB1	transcription regulator		0.874	0.000395	CCN1,CCNG2,TF,VIM
MAP2K4	kinase		0.871	3.52e-05	CCND1,FOS,GADD45A,JUN	48 (20)
NUPR1	transcription regulator		0.853	0.000244	BNIP3,CCN1,FAM162A,GADD45A,SAT1,SPP1,VIM,ZFP36L1
SNAI1	transcription regulator		0.842	1.01e-06	CCN1,CCND1,FOS,ID1,SOX2,TF,VIM	48 (24)
INHBA	growth factor		0.822	4.56e-07	BAMBI,CCND1,CD24,JUNB,RGS16,SOX2,SOX4,VIM	35 (7)
NANOG	transcription regulator		0.816	1.34e-06	EGR1,FOS,FOSB,ID1,ID3,KDR,SOX2	47 (9)
miR-3667-3p (miRNAs w/seed CCUUCCU)	mature microRNA		0.816	0.000129	FAM89A,GADD45A,GADD45G,KDR,MYBL1,QDPR
miR-4716-3p (and other miRNAs w/seed AGGGGGA)	mature microRNA		0.816	0.012	FAM131C,FOSB,HES4,PCBP4,SOX4,SYP
CASR	G-protein coupled receptor		0.816	5.03e-06	CCND1,EGR1,GADD45A,GADD45G,ID1,PTTG1	49 (13)
STAT1	transcription regulator		0.808	0.00246	CCND1,EGR1,FOS,HES1,JUN,NEUROD1	50 (20)
miR-6732-5p (and other miRNAs w/seed AGGGGGU)	mature microRNA		0.788	0.00132	DLL3,FAM131C,FOSB,JUNB,PCBP4,SOX4,SYP,ZFP36L1
Ngf	group		0.78	3.45e-09	CCND1,DUSP1,EGR1,FOS,JUN,NR4A1,STMN2	48 (23)
MSTN	growth factor		0.762	8.72e-05	FOS,H4C3,SPP1,VIM
ESR2	ligand-dependent nuclear receptor		0.76	1.24e-06	BAMBI,CCN1,CCND1,EGR1,FOS,JUNB,KDR,KPNA2,PMEPA1,SOX11,SOX4,SPP1,VIM	46 (18)
NFKB1	transcription regulator		0.748	5.49e-08	BAMBI,CCN1,CCND1,DUSP1,EGR1,FOS,FOSB,GADD45A,NR4A1,SOX9	44 (18)
CSF3	cytokine		0.692	0.000762	EGR1,FOS,GADD45A,GADD45G,JUN	41 (21)
QKI	other		0.692	9.63e-06	FABP7,GPM6B,ID1,SOX2,VIM	30 (7)
GH1	growth factor		0.68	5.22e-09	EGR1,FOS,GADD45A,ID3,JUN,JUNB,SPP1,VIM	41 (18)
miR-1249-5p (and other miRNAs w/seed GGAGGGA)	mature microRNA		0.664	0.0126	FAM131C,FOSB,GAS1,HES6,MFNG,NR4A1,SH3BGRL3,SYP,UBE2S,ZFP36L1
PLCG1	enzyme		0.651	4.41e-07	CCND1,EGR1,FOS,KDR	47 (24)
SMAD7	transcription regulator		0.651	1.02e-05	GADD45A,ID1,ID3,PMEPA1,SOX2,SOX9	45 (16)
IKBKB	kinase		0.647	6.16e-05	CCND1,EGR1,FOS,GADD45A,JUNB,RBP1,RGS16	55 (23)
NFKBIA	transcription regulator		0.635	1.13e-12	BNIP3,CCND1,FOS,GADD45A,GADD45G,HES1,ID1,ID3,JUN,JUNB,NR4A1,PMEPA1,RBP1,RGS16,SAT1,SOX9	54 (22)
DLK1	other		0.617	9.66e-06	HES1,SOX2,SOX9,SYP	21 (3)
PITX2	transcription regulator		0.596	0.000107	CCND1,EGR1,GADD45A,SOX2,VIM	45 (19)
IL2	cytokine		0.593	3.48e-05	CCND1,CCNG2,DUSP1,FOS,FOSB,GADD45G,JUN,JUNB,RGS16,SPP1,VIM	48 (24)
Calcineurin protein(s)	complex		0.59	3.62e-06	DUSP1,EGR1,FOS,NR4A1,SPP1	48 (23)
FOXO1	transcription regulator		0.566	4.48e-09	BNIP3,CCND1,CCNG2,EGR1,FOS,FOSB,GADD45A,JUN,JUNB,NEUROD1,SOX2,SOX4,SOX9	46 (20)
IL33	cytokine		0.555	0.00246	BNIP3,CCND1,FAM162A,JUNB,NR4A1,SOX2	37 (11)
TFAP4	transcription regulator		0.555	4.88e-07	CCNG2,EGR1,FOS,ID1,VIM	34 (7)
FOS	transcription regulator		0.553	4.39e-09	CCND1,EGR1,FOS,FOSB,GAS1,JUN,JUNB,NR4A1,PMEPA1,PTTG1,RBP1,SFRP2,SPP1,VIM	47 (19)
LEF1	transcription regulator		0.552	0.00045	CCND1,FOSB,HES1,SOX9,SPP1,VIM	38 (13)
HNF4A	transcription regulator		0.541	0.0473	CCND1,CCNG2,EGR1,GADD45G,GAS1,GATB,JUN,JUNB,OTX2,SOX9,SPP1,TF
OGA	enzyme		0.535	6.93e-11	CADPS,CCND1,CCNG2,CD24,FABP7,GADD45A,GADD45G,GAS1,JUN,MCAM,OTX2,SOX2,SOX9,VIM
PRKCD	kinase		0.518	2.67e-06	BNIP3,CCND1,FOS,JUN,JUNB,NR4A1,SOX2	49 (21)
IL17A	cytokine		0.501	1.09e-05	CCN1,CCND1,FOS,GADD45A,JUN,RGS16,SPP1,VIM	47 (18)
TP53	transcription regulator		0.47	4.36e-14	BNIP3,CCN1,CCND1,CCNG2,DUSP1,EGR1,FOS,GADD45A,GADD45G,GAS1,GPM6B,HES1,ID1,ID3,JUN,JUNB,KDR,KPNA2,MCAM,MYBL1,PCBP4,PMEPA1,PTTG1,QDPR,RGS16,SAT1,SFRP2,SOX2,SPP1,VIM,ZFP36L1	47 (18)
IL4	cytokine		0.46	1.24e-05	ATP1A3,BNIP3,CCND1,FAM162A,FOS,FOSB,GADD45G,GATB,GPM6B,ID3,JUN,JUNB,SOX2,SPP1,VIM	48 (21)
Gsk3	group		0.454	7.86e-09	CCND1,FOS,FOSB,JUN,KDR,NR4A1,SPP1	45 (21)
FGF21	growth factor		0.453	0.000119	CCND1,EGR1,FOS,VIM	44 (21)
HMOX1	enzyme		0.447	6e-05	CCND1,FOS,ID1,ID3,KDR	49 (23)
miR-3202 (miRNAs w/seed GGAAGGG)	mature microRNA		0.447	0.00862	CCND1,FAM89A,JUNB,MLLT11,SYP
miR-3179 (miRNAs w/seed GAAGGGG)	mature microRNA		0.447	0.00519	ATP1A3,CCND1,FAM131C,FOSB,SYP
miR-485-5p (and other miRNAs w/seed GAGGCUG)	mature microRNA		0.447	0.0273	FABP7,FAM89A,GATB,ID1,SRRM4
ERBB4	kinase		0.447	1.02e-05	CCND1,DUSP1,EGR1,GADD45A,JUN	46 (22)
RARB	ligand-dependent nuclear receptor		0.447	9.6e-08	EGR1,GADD45A,ID1,ID3,JUN,OTX2,SOX2,SPP1	43 (12)
miR-6980-5p (and other miRNAs w/seed UGGGGGG)	mature microRNA		0.426	0.00459	ATP1A3,DUSP1,FOSB,H4C3,INSM1,NR4A1,SH3BGRL3,SYP,ZFP36L1
miR-16-5p (and other miRNAs w/seed AGCAGCA)	mature microRNA		0.425	0.0342	CCND1,GADD45G,JUN,MLLT11,MYBL1,UBE2S
TWIST1	transcription regulator		0.414	0.000276	FOS,SOX2,SPP1,TF,VIM
BCL2	transporter		0.401	5.75e-08	BNIP3,CCND1,FOS,GADD45A,MCAM,SCG3,SOX9	54 (24)
BCL3	transcription regulator		0.397	6.06e-08	CCND1,EGR1,FOS,ID1,JUN,NR4A1	47 (21)
PLAUR	transmembrane receptor		0.32	3.16e-07	CCND1,JUN,JUNB,KDR,VIM	39 (18)
miR-291a-3p (and other miRNAs w/seed AAGUGCU)	mature microRNA		0.317	0.000292	CCND1,CD24,FOSB,KPNA2,MYBL1,VIM
FASLG	cytokine		0.313	1.95e-05	CD24,EGR1,FOS,SOX2
APLN	other		0.308	4.29e-07	CCND1,EGR1,FOS,KDR,RBP1,VIM	43 (21)
GLI1	transcription regulator		0.308	8.35e-14	CADPS,CCN1,CCND1,CCNG2,CD24,EGR1,FOS,H4C3,HES1,ID1,ID3,PTTG1,SAT1,SOX2,SOX4,SOX9,SPP1,VIM	49 (19)
XDH	enzyme		0.305	5.77e-06	DUSP1,ID3,SPP1,VIM	34 (9)
SOX2	transcription regulator		0.3	7.57e-09	CCND1,DUSP1,FABP7,FOS,ID3,JUN,KDR,OTX2,PLP1,SOX2,SPP1,TF,VIM	31 (8)
SFRP1	transmembrane receptor		0.277	8.78e-07	CCND1,CD24,SOX9,TTYH1,VIM
ID3	transcription regulator		0.277	3.39e-06	CCNG2,DUSP1,GADD45G,ID3,NEUROD1,NR4A1,SOX4
NEDD9	other		0.254	0.000188	BNIP3,FOS,TF,VIM
CDKN1A	kinase		0.244	1.19e-05	CCN1,CCND1,CD24,DUSP1,GADD45A,SOX9,UBE2S,VIM	33 (10)
ERBB3	kinase		0.243	3.34e-05	CCN1,CCND1,CCNG2,DUSP1,EGR1	55 (27)
CDKN2A	transcription regulator		0.239	2.49e-07	CCND1,DUSP1,EGR1,FOS,GADD45G,ID1,JUN,PMEPA1,SOX2,VIM	53 (23)
CEBPA	transcription regulator		0.229	1.63e-05	CCND1,FOS,GADD45A,GAS1,ID1,JUN,JUNB,OTX2,SPP1	50 (23)
YY1	transcription regulator		0.2	7.46e-06	EGR1,FOS,GADD45G,H4C3,ID3,KDR,PLP1,VIM	44 (9)
GSK3B	kinase		0.2	6.45e-05	CCND1,FOS,KDR,NEUROD1,SPP1	46 (22)
MST1	growth factor		0.152	1.34e-06	CCND1,FOS,SOX4,SPP1	45 (22)
LRP6	transmembrane receptor		0.152	1.25e-06	CCND1,FOS,SPP1,TTYH1,VIM	52 (22)
miR-1226-5p (and other miRNAs w/seed UGAGGGC)	mature microRNA		0.152	0.01	GADD45A,MLLT11,PRSS35,SFRP2
ARID1A	transcription regulator		0.152	0.00128	CD24,HES1,SOX2,SOX9,VIM	36 (7)
FAT1	other		0.124	1.34e-06	CD24,JUN,SOX2,VIM
miR-3104-5p (and other miRNAs w/seed AGGGGGC)	mature microRNA		0.114	0.0194	ATOH7,FOSB,HES4,JUNB,RBP1,SH3BGRL3,SRRM4
CHUK	kinase		0.082	5.63e-06	CCND1,FOS,HES6,JUNB,RBP1,RGS16,SPP1	52 (24)
CREM	transcription regulator		0.081	1.22e-05	CCND1,DUSP1,EGR1,FOS,JUNB,NR4A1	43 (17)
ITGB1	transmembrane receptor		0.063	0.000179	FOS,GAS1,JUN,JUNB,VIM	42 (19)
INSR	kinase		0.056	3.45e-09	CCND1,CCNG2,DUSP1,EGR1,FOS,GADD45A,GAS1,JUNB,NR4A1,OTX2,RGS16,SAT1,SFRP2,SOX2	42 (21)
CYP19A1	enzyme		0.044	0.000381	CCND1,JUN,SOX9,SYP	36 (11)
KLF5	transcription regulator		0.039	5.06e-08	CCND1,DUSP1,ID3,JUN,SOX2,SOX4,ZFP36L1	25 (7)
RNF187	enzyme		0	6.06e-06	CCND1,ID1,JUN,PCBP4,ZFP36L1	34 (7)
HMG20A	transcription regulator		0	0.000438	CCN1,GADD45A,JUN,RGS16
miR-1909-3p (and other miRNAs w/seed GCAGGGG)	mature microRNA		0	0.0186	FAM131C,FOSB,HES4,PMEPA1,SH3BGRL3,STMN2,SYP,TTYH1
miR-4779 (miRNAs w/seed AGGAGGG)	mature microRNA		0	0.0372	FAM131C,FOSB,HES4,HES6
miR-3150a-3p (and other miRNAs w/seed UGGGGAG)	mature microRNA		0	0.00415	FOSB,HES1,HES4,NRL,PCBP4,SOX11,SYP,ZFP36L1
miR-1913 (miRNAs w/seed CUGCCCC)	mature microRNA		0	0.023	DUSP1,HES6,PCBP4,TTYH1
miR-3616-3p (miRNAs w/seed GAGGGCA)	mature microRNA		0	0.039	GADD45A,HES4,MLLT11,PRSS35
miR-1258-5p (and other miRNAs w/seed GCUGAGC)	mature microRNA		0	0.0408	H4C3,NEUROD4,TTYH1,VIM
miR-328-5p (and other miRNAs w/seed GGGGGGC)	mature microRNA		0	0.0428	ATP1A3,FAM131C,FOSB,HES4,JUNB,SYP
MACROH2A1	other		0	6.44e-06	EGR1,GADD45A,ID1,SOX2,VXN
ARNT	transcription regulator		0	1.05e-06	BAMBI,BNIP3,GAS1,HES6,SOX2,SPP1,VIM
miR-660-3p (miRNAs w/seed CCUCCUG)	mature microRNA		0	0.0143	BNIP3,EGR1,FOSB,SYP
FOXC1	transcription regulator		0	1.51e-05	EGR1,FOS,FOSB,JUN,SOX9,SPP1	50 (19)
HFE	transmembrane receptor		0	4.98e-05	DUSP1,EGR1,GADD45G,RGS16,TF
SNCA	enzyme		0	0.0109	DUSP1,FABP7,GADD45A,HES1,SYP
CST5	other		0	0.0118	ID3,RBP1,SOX4,VIM
HNF1B	transcription regulator		0	1.84e-05	DUSP1,GADD45A,ID1,ID3,LUM,PTF1A
ACVR1C	kinase		0	3.18e-06	CCND1,CCNG2,FOS,JUNB	43 (20)
TCF4	transcription regulator		0	0.0284	BNIP3,HES1,ID3,SOX9
miR-6832-3p (miRNAs w/seed CCCUUUU)	mature microRNA		0	0.000685	EGR1,SOX11,SOX4,TTYH1
miR-6846-5p (and other miRNAs w/seed GGGGGCU)	mature microRNA		0	0.0491	ATP1A3,CCNG2,FABP7,FOSB,HES4,JUNB
miR-6868-3p (miRNAs w/seed UCCUUCU)	mature microRNA		0	0.00324	GADD45A,OTX2,PLP1,QDPR
TGFB2	growth factor		0	2.22e-06	EGR1,FOS,GAS1,KDR,SPP1,VIM	51 (23)
SREBF2	transcription regulator		0	0.000242	CCN1,FABP7,HES6,NEUROD1
SALL4	transcription regulator		0	1.97e-05	CCN1,CCND1,ID3,JUN,SOX2,VIM	18 (3)
E2F1	transcription regulator		-0.025	7.02e-06	BNIP3,CCND1,DUSP1,EGR1,FOS,HES1,ID3,KDR,PTTG1,VIM	50 (22)
miR-338-3p (miRNAs w/seed CCAGCAU)	mature microRNA		-0.054	0.0176	CCND1,NEUROD1,SOX4,VIM
WNT1	cytokine		-0.06	6.78e-13	CCND1,CD24,EGR1,FOS,GADD45G,GAS1,HES1,JUN,JUNB,OTX2,SPP1	48 (23)
TP63	transcription regulator		-0.066	7.03e-12	CCN1,CCND1,EGR1,FOS,FOSB,GADD45A,HES1,ID1,ID3,INSM1,JUN,JUNB,PCBP4,SOX2,SOX4,SOX9,VIM	47 (22)
ITGA5	transmembrane receptor		-0.105	4.88e-07	CCND1,FOS,GAS1,JUN,JUNB	43 (25)
METTL3	enzyme		-0.106	0.000588	JUN,MYBL1,NR4A1,VIM
MAPK9	kinase		-0.111	0.000262	EGR1,FOS,GADD45A,JUN,JUNB	50 (22)
RARA	ligand-dependent nuclear receptor		-0.113	1.51e-10	CCND1,CD24,DUSP1,EGR1,FOS,H4C3,JUN,OTX2,PTTG1,RASD1,RBP1,SOX2,SPP1	49 (22)
HIF1A	transcription regulator		-0.124	2.68e-07	BNIP3,CCN1,CCND1,CD24,FAM162A,FOS,HES6,ID1,JUN,NR4A1,SOX9,VIM	48 (22)
SIRT1	transcription regulator		-0.128	1.44e-05	BNIP3,CCND1,CCNG2,GADD45A,ID1,PTF1A,RGS16,SFRP2,VIM	46 (18)
PRKCA	kinase		-0.149	2.04e-07	CCND1,EGR1,FOS,HES1,ID1,ID3,JUN	48 (21)
PGR	ligand-dependent nuclear receptor		-0.218	0.00458	CCND1,FOS,GPM6B,HES1,ID1,STMN2	48 (20)
OGT	enzyme		-0.218	3.48e-05	CCND1,FOS,JUN,RGS16,VIM	47 (20)
CCND1	transcription regulator		-0.218	1.28e-06	CCND1,ID1,ID3,MYBL1,PMEPA1,SOX11,SOX2,SOX4,SPP1	37 (12)
miR-1237-5p (and other miRNAs w/seed GGGGGCG)	mature microRNA		-0.239	0.0278	ATP1A3,HES4,INSM1,JUN,KDR,PMEPA1,RASD1
TFRC	transporter		-0.277	9.42e-05	BNIP3,FOS,GADD45A,JUN,SOX11
miR-27a-3p (and other miRNAs w/seed UCACAGU)	mature microRNA		-0.277	0.0145	CSRP2,FOSB,ID3,JUN,STMN2
FADD	other		-0.277	0.00018	EGR1,FOS,JUN,JUNB	52 (24)
miR-4651 (and other miRNAs w/seed GGGGUGG)	mature microRNA		-0.282	0.0223	CCND1,FOSB,ID3,MLLT11,NR4A1,RASD1,RBP1,SOX4,SYP,TTYH1,ZFP36L1
CEBPB	transcription regulator		-0.285	5.84e-07	CCND1,FOS,GADD45A,GAS1,ID1,JUN,KPNA2,SAT1,SPP1,TF,UBE2S,VIM	48 (19)
miR-19b-3p (and other miRNAs w/seed GUGCAAA)	mature microRNA		-0.297	0.00134	BAMBI,CCND1,FAM162A,NEUROD1,PMEPA1,SOX4
miR-4731-5p (miRNAs w/seed GCUGGGG)	mature microRNA		-0.333	0.000753	FAM131C,FOSB,HES4,MCAM,QDPR,RASD1,SFRP2,SH3BGRL3,SRRM4
miR-3072 (and other miRNAs w/seed GCCCCCU)	mature microRNA		-0.333	7.63e-05	GAS1,ID1,JUNB,MFNG,PCBP4,PLP1,SYP,TTYH1,UBE2S
MYC	transcription regulator		-0.335	5.06e-15	CCND1,CCNG2,CSRP2,DUSP1,EGR1,FOS,GADD45A,GADD45G,GAS1,HES1,ID1,ID3,JUN,KDR,LUM,OTX2,PLP1,PMEPA1,RBP1,SAT1,SOX2,SOX9,SPP1,TF,UBE2S,VIM,ZFP36L1	47 (20)
miR-30c-5p (and other miRNAs w/seed GUAAACA)	mature microRNA		-0.342	0.000452	CCND1,HES1,JUN,MLLT11,NEUROD1,RASD1,VIM
SCD	enzyme		-0.345	3.14e-05	EGR1,FOS,GADD45A,JUN,RBP1,SPP1	52 (22)
Immunoglobulin	complex		-0.358	5.37e-06	CCND1,DUSP1,EGR1,FOS,FOSB,KDR,NR4A1,RGS16,SAT1,SFRP2,SOX2,SOX9,SPP1,ZFP36L2	48 (26)
KL	enzyme		-0.372	4.89e-05	CCND1,EGR1,KDR,VIM	40 (13)
miR-6887-3p (miRNAs w/seed CCCCUCC)	mature microRNA		-0.378	0.00408	CCN1,JUN,JUNB,SOX11,SOX2,SOX4,SYP
PPARD	ligand-dependent nuclear receptor		-0.388	5.49e-06	CCND1,EGR1,FABP7,FAM131C,NR4A1,PLP1,RBP1,SAT1
KRAS	enzyme		-0.396	6.1e-18	BNIP3,CCN1,CCND1,CD24,DUSP1,EGR1,FOS,FOSB,GADD45A,GAS1,GPM6B,HES1,ID1,INSM1,JUN,JUNB,LUM,MCAM,NR4A1,PTTG1,SOX2,SOX9,SPP1,UBE2S,VIM,ZFP36L1	48 (18)
NR3C1	ligand-dependent nuclear receptor		-0.422	5.43e-06	CCN1,CCND1,DUSP1,EGR1,FOS,GADD45A,GAS1,JUN,RASD1,SOX4,SPP1,VIM	49 (18)
miR-6752-5p (and other miRNAs w/seed GGGGGUG)	mature microRNA		-0.426	0.0455	DUSP1,FAM131C,FOSB,ID3,NR4A1,RASD1,RBP1,SOX4,ZFP36L1
HOXA10	transcription regulator		-0.447	0.000298	ID1,MFNG,NR4A1,RBP1,SAT1
DNMT3A	enzyme		-0.447	0.000468	JUN,NR4A1,PCBP4,RGS16,SPP1
miR-6909-5p (miRNAs w/seed AGGGGGG)	mature microRNA		-0.447	0.0129	CCN1,DUSP1,SOX2,SOX4,SYP
miR-6867-3p (and other miRNAs w/seed UCUCCCU)	mature microRNA		-0.447	0.0163	CCN1,EGR1,GPM6B,NRL,RGS16
NDRG1	kinase		-0.453	8.72e-05	CCND1,FOS,JUN,VIM	51 (25)
KAT2A	enzyme		-0.456	1.48e-07	BNIP3,CCND1,CSRP2,H4C3,JUN,JUNB,UBE2S
SMAD4	transcription regulator		-0.462	5.34e-05	CCND1,CCNG2,FOS,GADD45A,ID1,SOX2,VIM	47 (23)
NCOA1	transcription regulator		-0.464	9.48e-06	CCND1,CD24,EGR1,FOS,JUNB,KDR	46 (19)
ADIPOQ	other		-0.48	0.00138	CCND1,DUSP1,EGR1,FOS,SYP	49 (23)
EPCAM	other		-0.485	6.28e-09	CCND1,EGR1,FOS,ID1,JUN,SOX2	49 (23)
miR-101-3p (and other miRNAs w/seed ACAGUAC)	mature microRNA		-0.492	0.00109	CSRP2,DUSP1,FOS,NEUROD1,SOX9
PDX1	transcription regulator		-0.493	2.1e-07	CCND1,EGR1,ID1,ID3,JUN,JUNB,NEUROD1,SPP1	46 (20)
KLF4	transcription regulator		-0.505	1.13e-07	CCND1,DUSP1,GADD45A,HES1,ID3,KDR,OTX2,SOX2,TF,VIM
KDM5B	transcription regulator		-0.524	4.46e-07	CCND1,EGR1,GADD45A,MCAM,SAT1,SOX4,SOX9
IL10	cytokine		-0.581	0.0177	DUSP1,FOS,JUN,RGS16,SPP1
ID2	transcription regulator		-0.61	2.64e-09	CCND1,CCNG2,DUSP1,GADD45G,ID3,MCAM,NR4A1,SOX4,SOX9,TF
KLF2	transcription regulator		-0.625	3.04e-05	GADD45A,ID1,ID3,JUNB,KDR,SOX9
ADORA2A	G-protein coupled receptor		-0.632	0.00102	ATP1A3,DUSP1,FOS,NR4A1	44 (21)
RASSF1	other		-0.728	5.55e-07	CCND1,EGR1,FOS,HES1,SOX9,SPP1	43 (24)
estrogen receptor	group		-0.728	1.63e-06	CCND1,CD24,EGR1,FOS,JUN,SAT1,SYP,VIM	46 (23)
miR-3475-3p (and other miRNAs w/seed CUGGAGG)	mature microRNA		-0.816	0.000144	FOSB,ID1,MCAM,NR4A1,SH3BGRL3,SYP
SFTPA1	transporter		-0.816	1.97e-07	CCN1,EGR1,FOS,FOSB,RASD1,SFRP2	43 (7)
STAT4	transcription regulator		-0.849	0.00616	GADD45G,HES6,RGS16,SAT1
MTOR	kinase		-0.853	0.00117	BNIP3,CCND1,DUSP1,FOS,PLP1,SOX4	43 (20)
IL5	cytokine		-0.853	3.98e-06	BNIP3,CD24,EGR1,FAM162A,GADD45A,GADD45G,LUM,VIM
miR-29b-3p (and other miRNAs w/seed AGCACCA)	mature microRNA		-0.896	0.0037	CCND1,ID1,MLLT11,PLP1,STMN2,ZFP36L1
PTEN	phosphatase		-0.915	5.57e-06	CADPS,CCND1,DUSP1,FOS,GPM6B,JUN,KDR,MCAM,SAT1,SOX4,SPP1,VIM	48 (25)
CD38	enzyme		-0.927	0.00204	BNIP3,FAM162A,GADD45G,VIM
miR-6835-5p (and other miRNAs w/seed GGGGGUA)	mature microRNA		-0.97	0.0315	FOSB,NR4A1,PRSS35,RASD1,SOX4,ZFP36L1
SAV1	other		-1	9.58e-07	CCND1,SOX4,SPP1,VIM	31 (7)
IL27	cytokine		-1	0.00132	EGR1,FOS,GADD45G,VIM	41 (14)
mir-1	microRNA		-1	0.000552	CCND1,SH3BGRL3,SOX9,ZFP36L1
miR-3093-5p (miRNAs w/seed GCACCCC)	mature microRNA		-1	0.00478	FOSB,GPM6B,HES6,SOX2
miR-343 (and other miRNAs w/seed CUCCCUU)	mature microRNA		-1	0.0106	CCN1,EGR1,GPM6B,RGS16
TIMP3	other		-1	2.11e-05	BAMBI,FOS,JUN,VIM	49 (15)
HIC1	transcription regulator		-1	4.3e-05	CCND1,MCAM,SOX9,SPP1	36 (7)
DGCR8	enzyme		-1.029	1.54e-08	CCND1,EGR1,FOS,HES1,PLP1,SOX2	50 (18)
miR-17-5p (and other miRNAs w/seed AAAGUGC)	mature microRNA		-1.05	0.000515	BAMBI,CCN1,CCND1,CCNG2,RASD1,VIM
THRB	ligand-dependent nuclear receptor		-1.06	5.16e-07	ATP1A3,CCND1,FOS,ID1,JUN,NR4A1,PTTG1,SFRP2,SPP1	41 (21)
miR-223-3p (miRNAs w/seed GUCAGUU)	mature microRNA		-1.067	0.00778	CCND1,FAM89A,GPM6B,VIM
miR-3648 (miRNAs w/seed GCCGCGG)	mature microRNA		-1.067	0.0041	CCND1,FAM131C,JUN,JUNB
CCN5	growth factor		-1.067	2.46e-05	CCND1,CD24,JUN,VIM	29 (9)
Hif1	complex		-1.067	0.000107	BNIP3,CCNG2,CD24,TF
SSTR2	G-protein coupled receptor		-1.118	1.03e-10	CCN1,FOS,GADD45A,JUN,PMEPA1,RGS16,SAT1,SOX9,VIM
PPARGC1A	transcription regulator		-1.132	0.000622	BNIP3,FOS,LUM,NEUROD1,NR4A1,NRL,SOX2
VHL	transcription regulator		-1.154	0.00128	BNIP3,CCND1,VIM,ZFP36L1	25 (7)
HDAC4	transcription regulator		-1.154	0.000107	CCND1,FOS,GADD45A,JUN,NR4A1	50 (24)
DACH1	transcription regulator		-1.154	2.22e-07	EGR1,FOS,ID1,JUN,SOX2	38 (14)
NR1H4	ligand-dependent nuclear receptor		-1.176	0.00694	CCN1,FABP7,NEUROD1,SPP1
BRCA1	transcription regulator		-1.191	0.000313	CCND1,EGR1,GADD45A,SAT1,VIM	48 (20)
TP73	transcription regulator		-1.242	0.00114	CCN1,CCNG2,EGR1,GADD45A,HES1,SAT1,SPP1	44 (11)
TLR4	transmembrane receptor		-1.303	0.000393	BAMBI,CCN1,FOS,GADD45G,NR4A1,RGS16,SPP1	51 (19)
DICER1	enzyme		-1.311	6.22e-09	CCN1,CCND1,EGR1,FOS,HES1,ID3,JUN,KDR,MCAM,SOX2,VIM	50 (22)
FOXO3	transcription regulator		-1.334	5.53e-13	BNIP3,CCN1,CCND1,CCNG2,EGR1,FOS,FOSB,GADD45A,ID1,JUNB,MCAM,PTTG1,SOX2,SOX9,VIM	50 (21)
miR-6798-5p (miRNAs w/seed CAGGGGG)	mature microRNA		-1.342	0.0114	FOSB,GAS1,HES4,STMN2,TTYH1
GRN	growth factor		-1.342	0.000337	CCND1,EGR1,FOS,SPP1,SYP	46 (24)
Hdac	group		-1.376	6.12e-08	CCND1,CCNG2,EGR1,FOS,JUN,NR4A1,SFRP2,SPP1	49 (22)
miR-155-5p (miRNAs w/seed UAAUGCU)	mature microRNA		-1.467	0.00319	CCN1,CCND1,CSRP2,FOS,VIM
FOXO4	transcription regulator		-1.477	3.48e-05	BNIP3,CCND1,CCNG2,GADD45A,SOX9	35 (5)
FOSL1	transcription regulator		-1.492	5.45e-10	CCN1,CCND1,EGR1,FOS,FOSB,JUN,JUNB,TF	43 (14)
mir-8	microRNA		-1.503	4.55e-05	CCND1,CCNG2,KDR,SOX2,SOX9,VIM	42 (22)
CDH1	other		-1.536	9.11e-06	CCND1,JUN,MCAM,SOX9,VIM	50 (25)
RB1	transcription regulator		-1.585	8.43e-10	BNIP3,CCND1,DUSP1,EGR1,FOS,FOSB,GADD45A,HES1,ID1,JUN,JUNB,KDR,PMEPA1,PTTG1	54 (23)
SPI1	transcription regulator		-1.706	5.34e-05	CCND1,FOS,HES1,ID3,JUN,SPP1,VIM	49 (20)
let-7	microRNA		-1.929	0.00746	CCND1,SOX2,SOX9,VIM	36 (7)
TGFB2-AS1	other		-1.951	0.000113	FOS,LUM,PMEPA1,SOX2
SOCS1	other		-1.951	0.00113	CCND1,DUSP1,FOS,JUN	45 (18)
miR-124-3p (and other miRNAs w/seed AAGGCAC)	mature microRNA		-1.964	0.00327	EGR1,HES1,NEUROD1,SOX9,TF,VIM,ZFP36L2
MEN1	transcription regulator		-1.972	3.77e-05	CCND1,FOS,GAS1,VIM	47 (26)
HTATIP2	transcription regulator		-1.982	8e-07	CCND1,FOS,SOX2,SPP1	40 (16)
mir-29	microRNA		-1.987	0.000318	CCND1,SFRP2,VIM,ZFP36L1
PRKAA1	kinase	Inhibited	-2	0.00273	CD24,PMEPA1,TTYH1,ZFP36L1
NFE2L2	transcription regulator	Inhibited	-2	0.00774	BNIP3,GADD45G,KDR,NEUROD1,SAT1,SYP
PAK2	kinase	Inhibited	-2	6.43e-06	DUSP1,GADD45A,ID1,ID3
STK11	kinase	Inhibited	-2.121	5.6e-07	CCND1,GADD45A,ID1,JUNB,LUM,MCAM,NR4A1,SPP1,TTYH1	40 (11)
ASCL1	transcription regulator	Inhibited	-2.176	5.3e-13	CCNG2,DLL3,GADD45G,ID1,ID3,INSM1,MFNG,NEUROD1,SOX2,SOX9
APC	enzyme	Inhibited	-2.199	1.56e-06	CCND1,HES1,ID1,ID3,JUN,SOX9,SPP1	49 (22)
PAX6	transcription regulator	Inhibited	-2.2	5.8e-05	ATOH7,CCND1,FABP7,HES1,OTX2,SOX2
APOE	transporter	Inhibited	-2.384	3.34e-06	CCN1,CCND1,EGR1,FOS,JUN,PMEPA1,SOX9,SPP1,SYP	48 (23)
COL18A1	other	Inhibited	-2.571	1.4e-08	CCND1,FOS,ID1,ID3,JUN,JUNB,KDR	51 (23)
Histone h2a	group			0.00437	EGR1,JUN
Vhl	complex			0.0252	CCND1
CSDE1 HNRNPD PABP PAIP1 SYNCRIP	complex			0.00318	FOS
p38 Sapk	group			0.0158	CCND1
dopamine D1 receptor	group			0.00635	FOSB
Keratin 16	group			0.00318	CCND1
TEAD	group			0.000539	CCN1,CCND1
collagenase	group			0.000144	EGR1,JUN,JUNB
N-Cadherin	group			0.000276	CCND1,SOX11
Cop9 Signalosome	complex			0.00635	JUN
Ggtase I	complex			0.00951	CCN1
dopamine receptor	group			0.000354	FOS,NR4A1
Osteocalcin	group			0.00951	CCND1
NF-Y	complex			0.00229	GADD45A,JUNB,MYBL1
NRDE2	other			0.0283	CCN1
JPT2	other			0.00951	CCND1
CHD8	enzyme			0.0238	NEUROD1,NEUROD4
CERT1	kinase			0.00635	CCND1
FAM172A	transcription regulator			0.0252	SOX9
EPHB2	kinase			0.0436	STMN2
GON4L	transcription regulator			0.0436	CCND1
ADRA1	group			3.08e-07	EGR1,FOS,JUNB	48 (24)
CSF2RB	transmembrane receptor			2.44e-05	FOS,JUN,JUNB	40 (19)
AMOT	other			0.00951	CCN1
ANTXR2	transmembrane receptor			0.000645	CCND1,VIM	8 (4)
CORO6	other			0.0127	CCND1
DIXDC1	other			0.00635	KDR
MSGN1	transcription regulator			0.000354	DLL3,HES1
Agtr1b	G-protein coupled receptor			0.0283	FOS
SOX2-OT	other			0.000645	SOX2,VIM
MEG3	other			0.000886	JUN,VIM
Rhox4b (includes others)	transcription regulator			0.0189	KDR
Mir218	microRNA			0.000354	SFRP2,SPP1
Sos	group			0.00396	FOS,PMEPA1,PTTG1,RBP1
BMP	group			8.56e-05	ID1,KDR,SPP1	12 (5)
MEF2	group			0.00494	JUN,NR4A1	26 (9)
Pdgfr	group			0.000761	EGR1,VIM	29 (7)
JAK	group			0.00828	HES6,VIM
G protein alpha i	group			0.0238	CCN1,FOS
Neurotrophin	group			0.022	FOS
SHP	group			0.0127	EGR1
Nos	group			0.00116	EGR1,FOS	32 (10)
Hsp27	group			0.0102	CCND1,FOS
CaMKII	complex			0.00221	FOS,SOX9	37 (10)
Wnt	group			0.000426	CD24,KDR,SOX9
Ras homolog	group			3.95e-05	CCND1,EGR1,FOS	46 (22)
STAT	group			0.00652	FOS,JUNB
p70 S6k	group			0.00358	CCND1,VIM	34 (11)
RNA polymerase II	complex			3.69e-06	DUSP1,FOS,GADD45A,ID1,JUN,JUNB,KPNA2,SPP1	34 (7)
Calcineurin A	group			0.000172	CCND1,FOS,JUN	44 (18)
Camk	complex			0.0189	KDR
Rb	group			0.0288	CCND1,PTTG1
Rap1	group			0.0344	FOS
Cyclin D	group			0.0344	SOX2
NFkB (family)	group			0.0256	CCND1,PLP1
Dynamin	group			0.000148	FOS,KDR
Mlcp	complex			0.00318	NR4A1
myosin-light-chain kinase	group			0.00951	CCND1
FGFR	group			2.89e-05	FOS,SOX2,SPP1	44 (18)
FKHR	group			0.00951	CCND1
Ikb	group			0.00263	CCND1,NR4A1
Pde	group			0.000354	FOS,NR4A1	27 (7)
Histone h3	group			5.81e-07	CCND1,EGR1,FOS,HES1,ID1,JUN,KDR,NEUROD1,OTX2,SOX11,SPP1	49 (23)
SERCA	group			0.000148	EGR1,JUN
Ck2	complex			0.0283	FOS
NFAT (complex)	complex			0.00333	NR4A1,SPP1
ROCK	group			2.65e-05	CCND1,FOS,SOX9,SPP1	45 (25)
Rac	group			0.000886	CCND1,FOS	35 (17)
NMDA Receptor	complex			0.00148	FOS,SYP	40 (11)
MSK1/2	group			9.98e-06	DUSP1,FOS
L-type Calcium Channel	complex			0.000354	EGR1,FOS	40 (17)
PLA2	group			0.00635	FOS
ETS	group			5.23e-05	CCND1,EGR1,FOS
growth factor receptor	group			0.00318	FOS
N-cor	group			0.00536	CCND1,HES1,STMN2	18 (4)
INSC	other			0.00318	KDR
ZFAS1	other			0.0406	VIM
PDGF-AA	complex			7.63e-05	FOS,SOX2,VIM	48 (13)
Stat1-Stat3	complex			0.00951	FOS
Stat dimer	complex			0.0158	FOS
NfkB1-RelA	complex			0.0107	CCND1,RGS16
Pdgf Ab	complex			0.00148	CCND1,FOS	42 (23)
G protein beta gamma	complex			0.00951	CCN1
Stat3-Stat3	complex			0.0138	CCND1,FOS
Ap1	complex			0.0218	CCND1,FOS,JUN
Integrin	complex			2.04e-05	CCND1,FOS,JUN	45 (22)
Bcl9-Cbp/p300-Ctnnb1-Lef/Tcf	complex			0.0283	CCND1
Smad1/5/8-Smad4	complex			0.0252	ID1
PLC	group			0.00148	FOS,NR4A1	38 (17)
JUN/JUNB/JUND	group			9.57e-05	CCN1,FOS,JUN
Esr1-Estrogen-Sp1	complex			0.00951	FOS
Nuclear factor 1	group			0.00437	FABP7,ID1
CPT1	group			0.0158	SOX2
CRNDE	other			0.0072	NR4A1,VIM
NPS	other			0.00635	FOS
Bvht	other			0.0238	KDR,VIM
PRKAA	group			0.0008	CCND1,DUSP1,VIM	44 (17)
VitaminD3-VDR-RXR	complex			0.00944	GADD45A,SPP1
Nfat (family)	group			0.0442	CCN1,CCND1
TFIIA	complex			0.0344	FOS
PSMB11	peptidase			0.00712	CCND1,GADD45A,NR4A1
Ptprd	phosphatase			0.0436	GADD45G
NR2F1-AS1	other			0.000148	CCND1,VIM
SNHG17	other			0.00318	SOX4
DBH-AS1	other			0.0313	CCND1
G-Actin	group			0.00318	JUN
thyroid hormone receptor	group			0.00333	FOS,PTTG1
LINC00842	other			0.0189	VIM
UCA1	other			0.0436	CCND1
Rbx1	enzyme			0.00635	PTTG1
LINC00461	other			0.0252	CCND1
Smad	complex			0.00309	ID1,ID3
Igm	complex			0.00158	EGR1,ID3,ZFP36L1	43 (7)
Raf	group			6.99e-05	CCND1,EGR1,FOS,JUN	46 (23)
Retinoic acid-RAR-RXR	complex			0.000276	DUSP1,RBP1
IL12 (complex)	complex			0.0291	FOS,GADD45G,JUN
KDM3A	transcription regulator			0.000325	CCN1,CCND1,MCAM
GPRC6A	G-protein coupled receptor			0.0436	EGR1
OTUD1	peptidase			0.022	VIM
VTCN1	other			0.0252	CCND1
H1-6	other			0.0307	FOS,PCBP4
PKNOX2	transcription regulator			3.39e-05	EGR1,GADD45A,VIM
NLGN1	other			0.022	CCND1
BBOX1	enzyme			0.0158	SOX2
LINC00662	other			0.0497	CCND1
FOXQ1	transcription regulator			0.0189	VIM
INTS11	enzyme			3.09e-08	EGR1,FOSB,NR4A1
CDK19	kinase			0.000626	GADD45A,JUN,SAT1,ZFP36L1
trypsin	group			0.0406	FOS
MUC15	other			0.00318	SOX2
FTO	enzyme			0.00026	CCND1,JUN,SOX2	43 (13)
IgG	complex			0.00488	DUSP1,EGR1,FOSB,JUNB,PMEPA1	46 (22)
NEUROD4	transcription regulator			0.0158	DLL3
NSD3	enzyme			0.000148	CCND1,VIM
MTO1	enzyme			0.000207	CCND1,VIM
DRD3	G-protein coupled receptor			0.0158	FOS
SLC38A5	transporter			0.00318	KDR
PADI4	enzyme			0.0497	GADD45A
DPPA3	other			0.0189	NEUROD1
TRIM37	enzyme			0.00866	EGR1,VIM
Jun-ATF2	complex			0.0158	CCND1
Fc gamma receptor	group			0.00465	CCND1,HES1	5 (3)
PARP	group			0.0313	VIM
NCK	group			0.00318	CCND1
NADPH oxidase	complex			0.00242	FOS,JUN	40 (13)
Beta Arrestin	group			0.0189	FOS
STAMBPL1	enzyme			0.00318	DUSP1
PRAG1	kinase			0.00951	HES1
NPSR1	G-protein coupled receptor			5.96e-05	GADD45A,NR4A1
BLVRA	enzyme			0.0283	JUN
KDM4D	enzyme			0.000761	CCND1,SOX9
CINP	other			0.0127	CCND1
HTR7	G-protein coupled receptor			0.0283	FOS
FUNDC1	other			0.00318	KDR
FMOD	other			9.98e-06	HES1,LUM
Snhg6	other			0.0158	CCND1
ESRP1	other			0.0313	SOX2
FOXD2-AS1	other			0.0406	HES1
KDM8	enzyme			0.00164	CD24,ID1,SOX9	34 (7)
IRF2BP1	transcription regulator			0.00755	DUSP1,FOS
ISX	transcription regulator			0.022	CCND1
MRPS18B	other			0.000207	SOX2,VIM
CLEC14A	other			0.0313	EGR1
ANO1	ion channel			0.0344	SOX2
FBXO31	enzyme			0.00635	CCND1
RHBDD1	peptidase			0.0127	VIM
HJURP	other			0.000442	CCND1,VIM
EIF4A3	enzyme			0.0252	CCND1
LINC01139	other			0.0313	EGR1
TET1	enzyme			0.0072	FOS,SOX2
THRAP3	transcription regulator			0.0497	CCND1
DACT1	other			9.92e-05	CCND1,JUN	26 (7)
ZNF276	transcription regulator			0.00951	CCND1
DAND5	other			0.0127	SOX2
SENP7	peptidase			0.0283	VIM
MSI2	other			3.95e-05	CCN1,SOX2,VIM	30 (7)
ZMIZ1	transcription regulator			0.0189	HES1
GSX2	transcription regulator			0.0406	RBP1
NPC1	transporter			0.00125	CCND1,EGR1,PLP1,SYP	30 (5)
DIRAS2	enzyme			0.0127	CCND1
MELK	kinase			0.000645	SOX2,VIM
FOXN4	transcription regulator			9.92e-05	NEUROD1,NEUROD4
CBX7	other			0.00383	CCND1,SOX2
Mir100hg	other			0.00951	VIM
ROBO3	transmembrane receptor			0.0313	SOX2
FOXL2	transcription regulator			0.00262	FOS,SOX4,SOX9
ZFP42	transcription regulator			0.0127	CCND1
PRDM4	transcription regulator			0.022	CCND1
ST6GALNAC1	enzyme			0.022	VIM
TRIM26	other			0.00318	SOX2
CCDC3	other			0.022	SOX9
ADGRL2	G-protein coupled receptor			0.0189	CCND1
RDH10	enzyme			0.022	SFRP2
WDR73	other			0.0252	JUN
PSPH	phosphatase			0.00635	NR4A1
MTDH	transcription regulator			0.0119	SPP1,VIM
FA2H	enzyme			0.000354	CCN1,VIM
FBXO25	enzyme			9.98e-06	EGR1,FOS	20 (5)
TOR1AIP1	other			0.00791	GADD45G,HES6
KLF8	transcription regulator			0.0252	CCND1
ZNF652	other			0.0283	VIM
APOL1	transporter			0.0467	HES1
USP28	peptidase			0.0375	CCND1
SH2D5	other			0.022	CCND1
DLX6-AS1	other			0.0189	HES1
MYEOV	other			0.00318	HES1
DNAJB4	other			0.0127	CCND1
Fcer1	complex			0.0172	FOS,JUN
SRF-ELK1	complex			0.00318	FOS
Gpcr	group			9.92e-05	FOS,JUN	44 (23)
NIBAN2	transcription regulator			0.00951	CCND1
HOXA-AS3	other			0.0127	VIM
SNHG11	other			0.0436	VIM
Csl	enzyme			0.0252	KDR
GPR17	G-protein coupled receptor			0.0252	FOS
ELOVL2	enzyme			0.0313	EGR1
NSRP1	other			0.0158	VIM
Meg3	other			0.0313	HES1
SLC15A4	transporter			0.00918	FOS,SAT1,VIM
ATOH7	transcription regulator			9.92e-05	SOX11,SOX4
AHI1	other			0.00309	CCNG2,MLLT11
RBM17	other			0.00951	SOX2
NOP58	enzyme			0.00951	CCND1
AKIRIN2	other			0.000207	CCND1,DUSP1
AMOTL2	other			0.0127	CCN1
GLIPR2	other			0.0127	VIM
KLF17	transcription regulator			0.00116	ID1,VIM
CLEC1B	transmembrane receptor			0.0375	SPP1
ZMPSTE24	peptidase			0.000483	GADD45A,GADD45G,RGS16	30 (7)
RBM15	other			0.00635	HES1
KCNJ12	ion channel			0.00318	CCND1
SNHG7	other			0.0283	VIM
BCAR4	other			0.022	VIM
TUSC3	transporter			0.0127	VIM
BMPR1A	kinase			0.000426	ID1,ID3,SOX9	34 (17)
MGAT1	enzyme			0.0344	VIM
GKN1	growth factor			0.00318	SOX9
MIEF2	other			0.0344	VIM
CALCOCO1	transcription regulator			0.00318	CCND1
AMBRA1	other			0.00984	CCND1,VIM	26 (7)
URGCP	other			0.00318	CCND1
ARHGAP35	transcription regulator			0.00318	KDR
ANKHD1/ANKHD1-EIF4EBP3	other			0.0406	CCND1
STAT1/3/5 dimer	complex			0.00286	FOS,JUNB
SIRT3	enzyme			0.0238	SOX2,VIM
LIN28B	other			5.2e-05	SOX11,SOX2,SOX9,VIM	30 (7)
ACOT12	enzyme			0.00951	VIM
SLC6A12	transporter			0.0127	NEUROD1
PRKAG3	kinase			0.00196	EGR1,GADD45G,ID1,JUNB
SOX17	transcription regulator			4.6e-06	CCND1,FOS,KDR,SOX2	37 (12)
RBM20	other			0.00536	SOX4,SRRM4,ZFP36L1
PHF8	enzyme			0.0313	ID1
HSPBP1	other			0.0127	SYP
CHD5	enzyme			0.0189	VIM
PARP14	enzyme			0.000539	CCND1,ID3
SPRED2	cytokine			0.00951	VIM
RUBCN	other			0.0406	SOX9
MYOC	other			0.0028	PLP1,SOX11,SPP1
LINC00887	other			0.0158	VIM
SETD1A	ion channel			0.000354	CCND1,SOX2
WAPL	other			0.0127	CCND1
RS1	other			0.0127	NRL
PRR7	other			0.00951	JUN
SERPINA6	other			0.0222	ATP1A3,BAMBI,SFRP2
DLK2	other			0.00951	HES1
LINC00472	other			0.022	SPP1
NQO2	enzyme			0.0313	CCND1
TRIB2	kinase			0.000354	SOX2,SYP
REM2	enzyme			0.00635	CCND1
RPRD1B	other			0.00635	CCND1
LEO1	other			5.96e-05	SOX2,SOX4
YOD1	enzyme			0.0344	CCN1
TMEM184A	other			0.00318	DUSP1
GPC6	transmembrane receptor			0.00951	CCND1
TMPRSS6	peptidase			0.00116	ID1,VIM
GATA2-AS1	other			0.00555	BNIP3,KDR
IGF2	growth factor			8.64e-12	CCND1,CCNG2,DUSP1,EGR1,FABP7,GADD45A,GAS1,JUNB,RGS16,SAT1,SPP1	47 (21)
KDM2B	enzyme			0.000241	CD24,FOS,SFRP2
TRPS1	transcription regulator			0.0115	PTTG1,SOX2
WWC1	transcription regulator			0.0375	VIM
MEMO1	other			2.56e-06	CCND1,FOS,JUN	43 (18)
NDUFAF3	other			0.00951	CCND1
PYCR1	enzyme			0.0158	VIM
TACSTD2	other			0.000354	CCND1,SYP
DKK4	other			0.0283	JUN
LLGL2	other			0.0041	CCN1,DUSP1
ATE1	enzyme			0.000207	CCND1,JUN	30 (12)
Fascin	group			0.00951	CCN1
CCDC88C	other			0.00635	CCND1
FOXK2	transcription regulator			0.0375	SOX2
TMTC3	enzyme			0.022	VIM
METTL1	enzyme			0.00148	CCND1,VIM
LINC01018	other			0.000207	CCND1,VIM
SMOC2	other			0.0436	VIM
SNORD22	other			0.0467	CCND1
Ftx	other			0.0158	JUN
C1QL1	other			2.99e-05	FOS,NR4A1	31 (7)
ZMIZ2	transcription regulator			9.92e-05	CCND1,JUN
Histone h4	group			0.000122	CCND1,FOS,GAS1,HES1,SPP1	38 (13)
E2F8	transcription regulator			0.0406	CCND1
S100A12	other			0.0375	CCND1
PSMD14	peptidase			0.00951	CCND1
ENKUR	other			0.00635	JUN
SLC17A6	transporter			0.00318	NR4A1
RRP1B	transcription regulator			0.00536	CCND1,GADD45A,SPP1
NBR2	other			0.0127	VIM
PDZK1IP1	other			0.0189	BNIP3
DPY30	other			0.000539	ID1,ID3
SOX11	transcription regulator			0.0107	CCND1,CD24,EGR1
TEX11	other			5.96e-05	CCND1,FOS
USP35	peptidase			0.0127	CCND1
KDM4C	enzyme			0.00221	SOX2,TTYH1
Crnde	other			0.000761	CCND1,VIM
CCDC62	transcription regulator			0.00318	CCND1
potassium channel	group			2.99e-05	FOS,JUN	15 (7)
endothelin receptor	group			0.0127	FOS
DRD1/5	group			0.0158	FOS
Gata	group			0.0158	KDR
sGC	complex			9.92e-05	EGR1,FOS	19 (5)
Shc	group			0.0313	FOS
Laminin (complex)	complex			0.000348	CCND1,STMN2,VIM	45 (15)
STAT1/3 dimer	complex			0.00318	FOS
SRC (family)	group			2.28e-05	EGR1,ID1,NEUROD1,SOX2	35 (15)
TCF/LEF	group			5.23e-05	CCND1,JUN,VIM
ETV2	transcription regulator			0.022	KDR
KMT5B	enzyme			0.022	DUSP1
PLCL2	enzyme			0.0375	ID1
Ribosomal Subunit 80S	complex			0.00951	EGR1
PVT1	other			0.0252	CCND1
KCTD9	other			0.0127	CCND1
USP24	peptidase			0.0127	PTTG1
Slfn1	enzyme			0.0127	CCND1
USP26	peptidase			0.0189	CCN1
PHF20L1	other			0.00318	SOX2
TSHZ3	transcription regulator			0.0133	FOSB,NR4A1
CHIT1	enzyme			0.0252	VIM
RNF32-DT	other			0.00951	CCND1
A1BG	other			0.00635	SOX2
CCDC12	other			0.0189	VIM
GFPT2	enzyme			0.00635	VIM
VGLL3	other			3.39e-05	SOX4,SOX9,SPP1
ZDHHC2	enzyme			0.0189	VIM
receptor protein tyrosine kinase	group			0.0127	SPP1
KLHL2	other			2.99e-05	CCND1,JUN
BATF2	transcription regulator			9.98e-06	CCN1,JUN
DSTYK	kinase			0.00951	CCND1
MKX	transcription regulator			0.0283	SOX9
TTYH1	ion channel			0.0158	HES1
VENTX	transcription regulator			0.00635	CCND1
CTDSP1	phosphatase			0.0283	VIM
BMPR2	kinase			0.0142	ID1,SPP1
AMOTL1	other			0.00951	CCN1
ZNF322	transcription regulator			0.00635	CCND1
ORAI3	other			0.0127	CCND1
ZNF32	transcription regulator			0.0189	SOX2
SORCS3	transporter			0.022	VIM
PNO1	other			0.00309	CCND1,HES1
CDH16	enzyme			0.0158	CCND1
BPIFB1	other			0.00309	CCND1,JUN
ADAP1	other			8.65e-06	FOS,JUN,NR4A1	30 (7)
FGF14	growth factor			0.00318	FOS
HJV	transmembrane receptor			0.0252	ID1
PCLAF	other			0.00465	GADD45G,PTTG1
BEST4	other			0.00635	CCND1
GNPTAB	enzyme			0.0127	SOX9
Fcor	enzyme			0.000539	CCNG2,GADD45A
TMEM165	other			0.000761	ID1,SOX9
CTDSPL2	phosphatase			0.00635	ID1
GAS2L3	other			0.0497	SAT1
DGCR5	other			0.0344	VIM
STK40	kinase			0.0244	DLL3,JUN
MUCL1	other			0.0127	CCND1
PDCL3	other			0.00318	KDR
TRPM3	ion channel			2.99e-05	EGR1,FOS
RBPJL	transcription regulator			0.0313	HES1
RAB23	enzyme			0.0158	SOX9
RADIL	other			0.00951	VIM
PRR11	other			0.0406	VIM
HYAL1	enzyme			0.0119	SOX9,SPP1
AGK	kinase			0.0497	SOX2
PLAC1	other			0.00318	CCND1
SLC47A1	transporter			0.0313	VIM
LRRC32	other			0.0313	VIM
PPM1E	phosphatase			0.00635	VIM
LINC00324	other			0.000645	CD24,SOX2
KLHL21	enzyme			0.00951	DUSP1
GLIS2	transcription regulator			0.00524	CCND1,VIM	22 (7)
ZNRF3	enzyme			0.0189	SOX9
TMEM8B	other			0.0497	CCND1
SLC39A4	transporter			0.0158	CCND1
Sox2ot	other			2.44e-05	FABP7,SOX2,VIM
DUOXA1	other			3.65e-06	NEUROD1,NEUROD4,VIM
PTPN23	phosphatase			0.00951	VIM
DEPTOR	other			0.0375	VIM
PPP1R14B	phosphatase			0.0189	KDR
WDR4	enzyme			0.0313	VIM
OLA1	enzyme			0.00951	CCND1
FNDC5	other			0.0497	SPP1
KDM4A	transcription regulator			5.97e-05	CCND1,SOX2,TTYH1
NSD2	enzyme			0.00026	FOS,GADD45A,JUN
ZNF382	transcription regulator			0.0252	ID1
MRGPRX1	G-protein coupled receptor			0.00635	EGR1
PHF6	transcription regulator			0.00619	JUN,SOX4
FANK1	transcription regulator			0.00318	JUN
TCF7L1	transcription regulator			0.0172	JUN,STMN2
ELOVL3	enzyme			0.0215	LUM,SPP1
SBDS	other			9.11e-06	EGR1,FOS,ID1,OTX2,SPP1	26 (6)
SNHG20	other			0.000539	CCND1,VIM
AGAP2-AS1	other			0.0127	SOX2
OIP5-AS1	other			0.00165	CCND1,OTX2
WBP2	transcription regulator			0.00956	EGR1,JUN,SOX4
DANCR	other			0.0467	VIM
DACT3	other			0.0127	CCND1
LTBP4	growth factor			0.0252	ID1
CYSLTR2	G-protein coupled receptor			0.0344	EGR1
HERC3	enzyme			0.0252	VIM
PCIF1	enzyme			0.00318	FOS
26s Proteasome	complex			0.0126	JUNB,SOX2,VIM
Sapk	group			5.96e-05	FOS,GADD45A	16 (3)
ETS-ELK1	complex			0.00635	CCND1
IL-2R	complex			0.0252	FOS
CTNNβ-LEF1	complex			0.00635	CCND1
SOX2-OCT4	complex			0.0252	SOX2
SMAD1/5	group			0.000354	ID1,ID3
PDS5B	other			0.0252	SOX2
FERD3L	transcription regulator			0.00318	HES1
PCA3	other			0.0158	PMEPA1
MAP3K21	kinase			0.0252	VIM
CIP2A	other			0.00128	GADD45A,LUM,SAT1
RPE65	enzyme			0.0158	FOS
CYP46A1	enzyme			0.0344	SYP
GPR68	G-protein coupled receptor			0.0189	DUSP1
ROR1	kinase			0.00904	CCN1,VIM
SYT11	transporter			0.0313	VIM
48s	complex			0.0467	CCND1
MTORC1	complex			0.0138	CCND1,PLP1
sphingomyelinase	group			0.022	JUN
NEAT1	other			0.0406	CCND1
UBE2D3	enzyme			0.00951	CCND1
Endothelin	group			0.00148	FOS,JUN	41 (19)
Collagen type I (complex)	complex			0.00145	CCND1,KDR,VIM	46 (13)
Nkx2-2os	other			0.0467	CCND1
ZBED6	transcription regulator			0.00524	MYBL1,PMEPA1
WDR5	transcription regulator			7.63e-05	SFRP2,SPP1,VIM
EIF2AK3	kinase			0.00142	CCND1,EGR1,GADD45A,JUN	45 (21)
MAPK8IP3	other			0.00116	JUN,TF
EIF2B5	translation regulator			0.00013	DUSP1,TF,VIM
PDLIM1	transcription regulator			0.0127	VIM
IDH2	enzyme			2.11e-05	EGR1,JUN,SOX4,VIM
OMG	G-protein coupled receptor			0.00635	FOS
BCKDK	kinase			0.0283	PLP1
ABCB4	transporter			0.0119	SPP1,VIM
ATP1A2	transporter			0.00951	FOS
PRKDC	kinase			0.000188	CCND1,EGR1,PTTG1	30 (7)
MEF2D-NFAT2-p300	complex			0.00318	NR4A1
LDL-cholesterol	complex			0.0189	SYP
NAE1	enzyme			0.0467	CCND1
CSNK2B	kinase			0.0436	CCND1
PECAM1	other			0.0436	CCND1
Integrin alpha 5 beta 1	complex			0.00318	CCND1
mediator	complex			0.00318	FOS
Cathepsin	group			0.0158	CCND1
INTERLEUKIN	group			0.00635	FOS
HLA-DQ	complex			0.022	FOS
7S NGF	complex			0.0158	FOS
Ppp2c	group			0.000761	DUSP1,ID1
Gap	group			0.00951	FOS
Mapk kinase	group			0.00318	CCND1
ZNF467	transcription regulator			0.0127	FOS
IGFBP7	transporter			0.0467	CCND1
Retnla	other			0.0497	HES1
ICAM1	transmembrane receptor			0.0008	FOS,HES1,VIM	42 (13)
EIF4H	translation regulator			0.00635	CCND1
JDP2	transcription regulator			0.022	JUN
MAPK8IP1	other			4.56e-05	CCND1,FOS,JUN	43 (16)
SKP2	other			0.00685	CCND1,VIM	46 (13)
PPP1R1B	phosphatase			0.00132	CCND1,FOS	43 (27)
EIF4G2	translation regulator			0.00221	JUN,SOX2
CABIN1	other			0.0497	NR4A1
EIF3I	translation regulator			0.0158	CCND1
GAB2	other			0.00619	FOS,KDR	28 (7)
VWF	other			0.0283	HES1
HNRNPR	other			0.022	GPM6B
GFRA1	transmembrane receptor			0.0127	JUN
PMF1/PMF1-BGLAP	transcription regulator			0.00318	SAT1
PHF21A	other			0.0313	SYP
TEAD4	transcription regulator			3.93e-05	CCN1,CCND1,JUN,JUNB,VIM	41 (12)
DLL4	other			0.0107	HES1,KDR
ASCL2	transcription regulator			0.022	EGR1
MEIS2	transcription regulator			8.56e-05	ID1,ID3,SOX11
MAX	transcription regulator			0.00347	CCNG2,GADD45A,ID1
IRS1	enzyme			0.000107	CCND1,EGR1,FOS,SFRP2,SPP1	45 (22)
ZNF202	transcription regulator			0.00183	INSM1,PLP1
ARHGEF17	other			0.00318	FOS
RNMT	enzyme			0.00635	CCND1
RAB11FIP3	other			5.96e-05	FOS,JUN	25 (7)
CASP1	peptidase			0.00944	KDR,VIM
FANCG	other			0.00951	HES1
Atf	group			0.0158	JUN
ITGB5	other			0.0313	KDR
JMJD6	transmembrane receptor			0.0375	CCND1
ARHGEF1	other			0.000276	CCND1,FOS	38 (19)
NCOR2	transcription regulator			0.00102	CCND1,FOS,JUN	45 (22)
FEV	transcription regulator			0.00271	FOS,SOX9,VIM
ENPP1	enzyme			0.022	SPP1
SOX7	transcription regulator			0.00128	KDR,OTX2,SOX4
MCM10	other			0.0158	VIM
SRGAP1	other			0.00951	CCND1
EGLN	group			0.015	BNIP3,CSRP2,SOX9
PRMT5	enzyme			4.03e-05	CCND1,GAS1,SOX2,SOX9
MCF2L	other			0.00635	CCND1
SCAP	other			0.0348	HES6,ID1
PGF	growth factor			0.00755	EGR1,FOSB	22 (7)
MIR3936HG	other			0.0158	CCND1
PRRX1	transcription regulator			6.76e-05	FOS,SOX2,SOX9
LYL1	transcription regulator			5.97e-05	EGR1,ID1,ID3
NFAT5	transcription regulator			0.014	CD24,PRSS35,SPP1
FANCL	enzyme			0.00318	HES1
SERTAD1	transcription regulator			0.00951	CCND1
Tenascin	group			0.00318	CCND1
Betacatenin/TCF	complex			0.00102	CCND1,JUN
Cdk	group			0.000158	DUSP1,GADD45A,GADD45G
PXN	other			0.022	CCND1
PI3K (family)	group			0.00564	CCNG2,FOS,SOX4	17 (4)
ALOX12	enzyme			0.0375	JUN
HDAC10	transcription regulator			0.0313	NR4A1
PRKG2	kinase			1.07e-06	FOS,PLP1,SOX9	21 (3)
GPC3	other			0.00951	CCND1
PYY	other			0.0467	NEUROD1
PPM1D	phosphatase			0.0313	CCND1
FGFR4	kinase			5.03e-06	CCND1,FOS,KDR,RBP1,VIM	33 (10)
MAPK8IP2	other			0.00635	FOS
JAM3	other			0.00951	CCND1
HDAC5	transcription regulator			0.0028	HES1,JUN,NR4A1	6 (4)
NCOR1	transcription regulator			0.0404	CCND1,DUSP1
PRKD2	kinase			0.0189	KDR
CARTPT	other			0.0344	FOS
STAR	transporter			0.0177	ATP1A3,SPP1
VIP	other			0.0051	CCND1,FOS,VIM	52 (22)
CCK	other			0.00242	EGR1,FOS	41 (19)
APOA4	transporter			0.0436	FOS
FANCF	other			0.00635	HES1
C1QA	other			0.000158	EGR1,SYP,VIM
LCK	kinase			8.72e-05	EGR1,FOS,JUN,SOX2	43 (22)
HLX	transcription regulator			0.000158	EGR1,HES1,JUN
PDLIM7	other			0.0252	SPP1
TLCD3A	other			0.0127	CCND1
FANCA	other			0.000761	EGR1,HES1
GMNN	transcription regulator			0.0288	DUSP1,SOX2
PDE6B	enzyme			0.022	FOS
ZFHX3	transcription regulator			1.02e-05	CCND1,ID3,NEUROD1,PTTG1,RGS16
DEF6	other			0.00242	FOS,VIM	34 (7)
GADD45G	other			0.0375	FOS
SETD2	enzyme			0.000399	CCN1,CCND1,JUN
NDST1	enzyme			0.0283	KDR
PLSCR1	enzyme			0.0189	CCND1
CSDE1	enzyme			0.00148	FABP7,VIM
RUNX3	transcription regulator			0.00084	CCN1,CCND1,SPP1,VIM	34 (9)
LATS1	kinase			0.000544	CD24,SOX9,SPP1
GIP	other			0.0157	FOS,SPP1
GHRH	other			0.00286	CCND1,FOS	44 (22)
WDR48	other			0.0189	VIM
Til1	other			0.00951	SPP1
NTF4	growth factor			0.00116	FOS,SPP1	35 (11)
PAK4	kinase			0.0406	VIM
RAP1GAP	other			0.000207	CCND1,FOS	42 (22)
S100B	other			0.00165	FOS,JUN	46 (24)
AGTRAP	G-protein coupled receptor			0.0497	FOS
HOXB1	transcription regulator			0.0189	OTX2
HOXA2	transcription regulator			0.0283	SOX9
RRAD	enzyme			0.00951	CCND1
USF1	transcription regulator			0.00307	CCNG2,DUSP1,SPP1
FGF23	growth factor			0.0436	EGR1
AKAP12	transporter			0.0283	CCND1
EIF4EBP1	translation regulator			0.0157	CCND1,EGR1
TNFSF12	cytokine			0.0457	CCND1,HES6
MBNL1	other			0.000645	SOX2,SOX4
ELL	transcription regulator			0.00951	FOS
GNA14	enzyme			8.26e-05	BNIP3,GADD45A,NR4A1,ZFP36L1
ZNF281	transcription regulator			0.00984	GADD45A,GADD45G
SETBP1	transcription regulator			0.0256	CCND1,KDR
JUNB	transcription regulator			0.00163	CCND1,DUSP1,HES1,JUNB	30 (7)
CD244	transmembrane receptor			0.000442	EGR1,FOS	44 (17)
RBL1	transcription regulator			0.00191	CCND1,FOS,HES1	40 (11)
FGF20	growth factor			0.00635	SOX2
L1CAM	other			0.0406	STMN2
KCNN4	ion channel			0.0406	FOS
NAMPT	cytokine			0.0442	ID1,JUN
PRKAA2	kinase			0.00107	EGR1,TTYH1,VIM,ZFP36L1
CDC25B	phosphatase			0.0127	CCND1
IL11	cytokine			0.000107	FOS,JUN,JUNB,SPP1	44 (17)
PMP22	other			0.00221	JUN,SOX2
EHD1	other			0.000761	CCND1,VIM
IRF8	transcription regulator			0.025	EGR1,FOS,ID3
NEUROG3	transcription regulator			0.00484	HES6,NEUROD1,SYP
SHC1	other			0.00164	DAPL1,EGR1,FOS	18 (4)
BAD	other			0.0189	CCND1
ADRA2B	G-protein coupled receptor			0.0127	CCND1
SMAD1	transcription regulator			0.000454	ID1,SOX9,SPP1	11 (4)
PXDN	enzyme			0.00132	DUSP1,JUN
BCL11A	transcription regulator			0.0375	GADD45A
EGR3	transcription regulator			0.015	ID3,JUN,SOX9
FGF4	growth factor			0.00286	FOS,PTTG1
PTPRF	phosphatase			0.0127	CCND1
CTF1	cytokine			0.00652	FOS,JUNB	33 (13)
OPRK1	G-protein coupled receptor			0.000148	FOS,KDR
MAT2B	enzyme			0.00951	CCND1
POLR2A	enzyme			6.23e-05	CCND1,FOS,NEUROD1,VIM
SCN1A	ion channel			0.00635	VIM
ARTN	growth factor			0.0127	CD24
DAPK3	kinase			0.00635	CCND1
ACVR1	kinase			0.00984	CSRP2,ID1	16 (6)
MCL1	transporter			0.0252	CCND1
ZBTB16	transcription regulator			0.00544	CCND1,FABP7,ID3,SPP1
FAF1	other			0.022	VIM
ISL1	transcription regulator			0.0397	NEUROD1,NEUROD4
POU3F2	transcription regulator			2.44e-05	FABP7,NEUROD1,SYP
CRIP1	other			0.0189	SOX2
KIFAP3	other			0.00318	FOS
DNMT1	enzyme			0.00497	CCND1,SFRP2,VIM	41 (15)
ISLR	other			0.000241	CCN1,FOS,SOX11
GRK3	kinase			0.000207	CCN1,SOX9
FABP3	transporter			0.00333	EGR1,FOS	42 (11)
KLF9	transcription regulator			0.00165	CCND1,NEUROD1
CST3	other			0.0375	FOS
TRPM2	ion channel			0.00465	BNIP3,SYP
IL2RA	transmembrane receptor			0.00263	FOS,JUN	42 (13)
TFDP1	transcription regulator			0.00586	CCND1,PTTG1
BANP	other			0.0252	CCND1
HOXA13	transcription regulator			0.0119	SOX2,SOX9
ZFP36	transcription regulator			0.00347	FOS,JUN,SPP1	46 (20)
IHH	enzyme			0.00347	CCND1,KDR,SPP1
AGR2	other			0.000207	EGR1,FOS
ITCH	enzyme			0.0072	CCN1,FOS	26 (7)
NODAL	growth factor			0.00383	CCND1,CCNG2
CDK9	kinase			0.0147	FOS,VIM
CYP1A2	enzyme			0.00944	CCND1,RGS16
CTNNBIP1	other			0.0406	CCND1
TAF4	transcription regulator			1.39e-05	CCND1,GAS1,LUM,SFRP2,SPP1
ALDH1A2	enzyme			0.00465	CCN1,SPP1
ETV4	transcription regulator			0.00652	SPP1,VIM
SOD2	enzyme			0.0442	SOX2,SYP
LOXL2	enzyme			0.000886	SOX9,VIM
CLDN1	other			0.0189	VIM
IL1R1	transmembrane receptor			0.0157	EGR1,FOS
SPZ1	transcription regulator			0.00202	CCND1,VIM
IL24	cytokine			0.000544	CCND1,GADD45A,GADD45G
PPY	other			0.00318	FOS
SIM2	transcription regulator			0.00202	BNIP3,GADD45A
SEMA3D	other			0.00951	CCND1
MED14	transcription regulator			0.0375	DUSP1
RAC3	enzyme			0.00635	CCND1
BMP15	growth factor			0.00242	ID1,ID3	16 (6)
ACVR2A	kinase			0.0375	ID1
MSX2	transcription regulator			0.000325	CCND1,SPP1,VIM	41 (18)
LATS2	kinase			4.3e-05	CCN1,CD24,SOX9,SPP1
PROK2	other			0.0189	FOS
HINFP	transcription regulator			0.0283	H4C3
IDH1	enzyme			0.0172	EGR1,VIM
POU2F1	transcription regulator			0.00712	CCND1,GADD45A,SPP1	48 (10)
CDH2	other			5.23e-05	CCND1,JUN,VIM	48 (22)
PDGF (family)	group			0.00102	JUN,VIM	33 (7)
COPS5	transcription regulator			0.0416	FAM162A,SAT1,ZFP36L1
RXRB	ligand-dependent nuclear receptor			0.0204	ATP1A3,GADD45G,SPP1
CBR3-AS1	other			0.000207	CCND1,VIM
SDCBP2-AS1	other			0.00951	CCND1
LINC01133	other			0.0189	CCND1
TUNAR	other			0.00318	SOX2
CCAT1	other			0.0375	VIM
FGD5-AS1	other			0.0127	VIM
CRX	transcription regulator			0.00465	NEUROD1,NRL
LRAT	enzyme			0.0406	RBP1
FZD7	G-protein coupled receptor			0.0406	CCND1
ADAM10	peptidase			3.7e-07	CCND1,FABP7,FOS,GADD45G,PLP1,SOX9,SYP	16 (3)
EN1	transcription regulator			0.0497	CCND1
DLX1	transcription regulator			0.00139	SOX2,VIM,ZFP36L1
IRF2	transcription regulator			0.00956	CCND1,H4C3,ID1
ADAM17	peptidase			2.91e-07	CCND1,GADD45G,HES1,SOX2,SOX9,SPP1,TF	49 (21)
CTNND1	other			0.0313	VIM
GPHA2	other			0.00318	FOS
PLCD1	enzyme			0.0252	VIM
ZIC2	transcription regulator			0.0283	CCND1
PDE1C	enzyme			0.0127	SOX2
OSMR	transmembrane receptor			0.0172	FOS,JUNB
SPTBN1	other			0.0436	FOS
NEUROG2	transcription regulator			0.000241	NEUROD1,OTX2,SOX9
TSC22D3	transcription regulator			0.0128	CCND1,DUSP1
NEK10	kinase			0.0189	GADD45A
AGAP2	enzyme			0.0158	CCND1
KCNIP2	transporter			0.0252	FOSB
RUNX1	transcription regulator			0.0124	CCND1,SOX4,SOX9,SPP1
PRKG1	kinase			0.000144	CCND1,FOS,ID1	39 (20)
S100a7a	other			0.0283	CCND1
KLHL40	other			0.00635	BNIP3
HMGN1	transcription regulator			2.12e-06	FOS,FOSB,NEUROD1,SOX9
U2AF2	other			0.00951	CCND1
EGLN1	enzyme			0.0221	HES1,SOX9
CD24	other			0.00497	FOS,JUN,MCAM	23 (7)
GSTP1	enzyme			0.0178	AMER2,JUN,SFRP2
MAPT	other			0.000147	ATP1A3,CCND1,FOS,GPM6B,JUN,QDPR,STMN2,SYP,VIM	51 (23)
CIC	transcription regulator			0.0375	CCND1
NMB	other			5.96e-05	FOS,JUN	46 (16)
ELAVL1	other			0.00115	CCN1,DUSP1,FOS,SAT1,VIM
H1-2	other			0.00116	CCND1,GADD45A
CBX2	transcription regulator			0.0436	SOX9
IRF4	transcription regulator			0.0267	BNIP3,SPP1,ZFP36L1
ADCY2	enzyme			0.00318	CCND1
VASP	other			0.0436	CCND1
MMP9	peptidase			0.000552	CCND1,FOS,GADD45A,VIM	51 (22)
WNT5A	cytokine			0.00756	CCND1,ID3,SPP1,VIM	33 (13)
HMGCR	enzyme			0.022	CCN1
UBA1	enzyme			0.00263	CCND1,VIM
NUMB	other			0.00333	HES1,VIM
MPZ	other			5.23e-05	JUN,SOX2,SOX4
PDGFA	growth factor			0.000442	EGR1,SOX2
ADAMTS7	peptidase			0.00318	SOX9
RAX	transcription regulator			0.00116	HES1,OTX2
SP1	transcription regulator			3.73e-06	CCND1,CCNG2,EGR1,FOS,JUN,KDR,MYBL1,PTTG1,SOX9,SPP1,VIM	51 (25)
ARID1B	transcription regulator			0.0127	FOS
MYOF	other			0.0436	KDR
MBIP	other			0.0313	JUN
PTK2	kinase			5.87e-05	CCN1,CCND1,FOS,SPP1	47 (24)
SOX8	transcription regulator			0.0406	PLP1
FOXP3	transcription regulator			0.00301	EGR1,FOS,JUN,NR4A1	46 (22)
CXCR1	G-protein coupled receptor			0.0252	CCND1
CCR3	G-protein coupled receptor			0.0375	SPP1
NEUROD1	transcription regulator			0.000929	INSM1,NEUROD1,SYP
FLI1	transcription regulator			0.0199	CCND1,EGR1
RLIM	enzyme			0.0344	VIM
AGRP	other			0.0313	FOS
LTBR	transmembrane receptor			0.0152	GPM6B,JUNB
ZFPM2	transcription regulator			0.00116	KDR,SOX9
SIM1	transcription regulator			0.0316	EGR1,PLP1,ZFP36L1
MAP3K3	kinase			0.00309	FOS,JUN	39 (18)
DAB2IP	other			0.000539	EGR1,VIM
NGFR	transmembrane receptor			0.00026	CCND1,FOS,JUN	45 (26)
CCL2	cytokine			0.0055	CCND1,FOS,SOX2	42 (24)
MCF2	other			0.0158	CCND1
GFI1	transcription regulator			0.0126	GADD45G,JUN,NEUROD1
PIAS2	transcription regulator			0.0375	FOS
DAB2	other			0.000207	CCND1,FOS	37 (18)
PHIP	other			0.022	CCND1
DUSP4	phosphatase			0.0406	DUSP1
LIPC	enzyme			0.0344	VIM
DYRK1B	kinase			0.0344	CCND1
ELP3	enzyme			0.0252	SOX9
PHF19	other			0.0127	OTX2
CHRM3	G-protein coupled receptor			6.67e-06	CCN1,EGR1,FOS	46 (17)
TERT	enzyme			4.42e-05	BNIP3,CCND1,CD24,NEUROD1,SPP1,VIM	31 (7)
NTF3	growth factor			0.00524	FOS,JUN	42 (21)
SNCB	other			0.022	SYP
DSCAM	other			0.00347	GADD45G,ID3,VIM
STRA6	transporter			0.022	RBP1
TEC	kinase			0.0313	FOS
ENO1	enzyme			0.0313	VIM
SLC7A11-AS1	other			0.000148	CCND1,JUN
IGF2BP1	translation regulator			0.000222	GADD45A,LUM,SOX9
SMC3	other			0.00102	CCNG2,SOX4
PNN	other			0.0497	JUN
APBB1	transcription regulator			0.00102	CCND1,HES1	18 (6)
miR-1968-3p (miRNAs w/seed CCACCUC)	mature microRNA			0.0124	ATOH7,NRL,RGS16
mir-338	microRNA			3.65e-06	CCND1,SOX4,VIM
mir-221	microRNA			0.00791	KDR,SPP1
miR-1283 (miRNAs w/seed CUACAAA)	mature microRNA			0.0204	ATOH7,FABP7
miR-224-3p (and other miRNAs w/seed AAAUGGU)	mature microRNA			0.0193	CCN1,NEUROD1
mir-190	microRNA			0.000276	CCND1,VIM
mir-302	microRNA			0.0436	KPNA2
miR-10a-5p (and other miRNAs w/seed ACCCUGU)	mature microRNA			0.025	FAM131C,SOX2,VIM
mir-148	microRNA			0.00791	EGR1,VIM
miR-4707-5p (miRNAs w/seed CCCCGGC)	mature microRNA			0.00712	HES4,MCAM,SOX4
miR-675-5p (and other miRNAs w/seed GGUGCGG)	mature microRNA			0.032	DLL3,TAGLN3,ZFP36L2
miR-448-3p (and other miRNAs w/seed UGCAUAU)	mature microRNA			0.0111	FABP7,NEUROD4,PTF1A
miR-449c-3p (miRNAs w/seed UGCUAGU)	mature microRNA			0.0307	LUM,NEUROD4
miR-449a-3p (miRNAs w/seed AGCUAAC)	mature microRNA			0.00828	INSM1,KPNA2
mir-506	microRNA			0.0313	VIM
miR-296-3p (miRNAs w/seed AGGGUUG)	mature microRNA			0.0131	CADPS,HES6,JUNB
miR-743b-5p (and other miRNAs w/seed GUUCAGA)	mature microRNA			0.0138	ATP1A3,GPM6B,PMEPA1
miR-470-5p (miRNAs w/seed UCUUGGA)	mature microRNA			0.0457	GAS1,NEUROD4
mir-637	microRNA			0.0189	CCND1
mir-17	microRNA			0.00357	CCND1,PTF1A,VIM	20 (8)
miR-196a-1-3p (miRNAs w/seed AACGACA)	mature microRNA			0.0115	NEUROD1,SOX9
mir-196	microRNA			0.0497	FOS
mir-130	microRNA			0.00791	GADD45A,KDR
miR-4649-5p (and other miRNAs w/seed GGGCGAG)	mature microRNA			0.0207	DUSP1,FOSB,GADD45G
miR-34a-3p (miRNAs w/seed AAUCAGC)	mature microRNA			0.00145	DUSP1,FOS,JUN
miR-3081-3p (miRNAs w/seed UGCGCUC)	mature microRNA			0.025	CCN1,VIM
miR-192-5p (and other miRNAs w/seed UGACCUA)	mature microRNA			0.012	DAPL1,H4C3,NRL
miR-548b-3p (miRNAs w/seed AAGAACC)	mature microRNA			0.0162	JUNB,VXN
mir-183	microRNA			0.0133	EGR1,VIM
miR-141-3p (and other miRNAs w/seed AACACUG)	mature microRNA			0.0455	GADD45A,SOX2,VIM
miR-4704-5p (miRNAs w/seed ACACUAG)	mature microRNA			0.00383	CCNG2,VXN
miR-541-5p (and other miRNAs w/seed AAGGAUU)	mature microRNA			0.00994	CCND1,LUM,VIM
mir-541	microRNA			0.000442	CCND1,VIM
miR-3082-3p (and other miRNAs w/seed ACAUGGC)	mature microRNA			0.0366	CCND1,GAS1,TF
miR-1955-5p (miRNAs w/seed GUCCCAG)	mature microRNA			0.0324	FAM89A,ID3,VXN
MIR4269	microRNA			0.0158	CCN1
miR-4640-3p (miRNAs w/seed ACCCCCU)	mature microRNA			0.025	FOSB,PLP1,SOX4
miR-1264-5p (miRNAs w/seed GGUCCUC)	mature microRNA			0.0492	H4C3,PTTG1,RASD1
miR-545-3p (miRNAs w/seed CAGCAAA)	mature microRNA			0.0434	AMER2,DUSP1
miR-1197 (and other miRNAs w/seed AGGACAC)	mature microRNA			0.0391	BAMBI,FABP7,PRSS35
miR-129-5p (and other miRNAs w/seed UUUUUGC)	mature microRNA			0.00102	PMEPA1,SOX2,SOX4
mir-129	microRNA			0.00635	SOX2
miR-344-3p (and other miRNAs w/seed GAUCUAG)	mature microRNA			0.0107	MLLT11,OTX2
miR-4530 (miRNAs w/seed CCAGCAG)	mature microRNA			0.0497	BAMBI,JUNB,SH3BGRL3
miR-4802-3p (and other miRNAs w/seed ACAUGGA)	mature microRNA			0.0198	CADPS,FOS,SOX2
mir-329	microRNA			0.022	CCND1
let-7g-3p (miRNAs w/seed CUGUACA)	mature microRNA			0.0162	CCNG2,NEUROD1,SOX2
miR-1182 (and other miRNAs w/seed AGGGUCU)	mature microRNA			0.0222	H4C3,MLLT11,SH3BGRL3
miR-218-2-3p (and other miRNAs w/seed AUGGUUC)	mature microRNA			0.0457	GADD45A,NEUROD4
miR-122b-5p (miRNAs w/seed UUAGUGU)	mature microRNA			0.0294	BNIP3,CSRP2
mir-122	microRNA			0.0376	SH3BGRL3,VIM
miR-3910 (miRNAs w/seed AAGGCAU)	mature microRNA			0.00761	FABP7,MYBL1,ZFP36L2
miR-4660 (miRNAs w/seed GCAGCUC)	mature microRNA			0.0374	HES6,NR4A1,PMEPA1
miR-133a-5p (miRNAs w/seed GCUGGUA)	mature microRNA			0.0358	CSRP2,NEUROD1,VIM
mir-31	microRNA			0.00437	BAMBI,SPP1
mir-140	microRNA			7.63e-05	BNIP3,SOX2,VIM
miR-5131 (and other miRNAs w/seed GGCGCCC)	mature microRNA			0.0455	CCND1,GADD45G,PRDM13
miR-1302 (and other miRNAs w/seed UGGGACA)	mature microRNA			0.0237	GATB,MCAM,RBP1
miR-127-3p (miRNAs w/seed CGGAUCC)	mature microRNA			0.0284	BNIP3,GADD45G,H4C3
mir-127	microRNA			0.0406	DUSP1
miR-876-5p (and other miRNAs w/seed GGAUUUC)	mature microRNA			0.00937	GADD45A,QDPR,VIM
mir-320	microRNA			0.0344	CCND1
miR-153-3p (miRNAs w/seed UGCAUAG)	mature microRNA			0.0387	NEUROD1,NEUROD4,TAGLN3
miR-598-5p (miRNAs w/seed CGGUGAU)	mature microRNA			0.0256	CSRP2,ID1
miR-191-5p (and other miRNAs w/seed AACGGAA)	mature microRNA			0.0368	EGR1,VXN
miR-3678-3p (miRNAs w/seed UGCAGAG)	mature microRNA			0.014	BAMBI,GADD45G,SRRM4
miR-21-5p (and other miRNAs w/seed AGCUUAU)	mature microRNA			0.0215	KDR,LUM,MYBL1
miR-2355-3p (miRNAs w/seed UUGUCCU)	mature microRNA			0.0126	PRSS35,RGS16,VXN
miR-503-5p (miRNAs w/seed AGCAGCG)	mature microRNA			0.0212	CCND1,GADD45G,RGS16
mir-455	microRNA			0.0467	CCND1
mir-497	microRNA			0.0283	CCND1
miR-339-3p (miRNAs w/seed GAGCGCC)	mature microRNA			0.0294	CSRP2,ID1,MCAM
mir-612	microRNA			0.0158	VIM
miR-138-1-3p (miRNAs w/seed CUACUUC)	mature microRNA			0.00132	ATOH7,FAM162A
mir-138	microRNA			0.0127	VIM
miR-142-5p (and other miRNAs w/seed AUAAAGU)	mature microRNA			0.0221	CCNG2,VIM
mir-142	microRNA			0.0215	MCAM,SOX2
miR-684 (miRNAs w/seed GUUUUCC)	mature microRNA			0.0301	SOX2,VIM
miR-5121 (miRNAs w/seed GCUUGUG)	mature microRNA			0.0136	NEUROD1,SPP1,STMN2
mir-378	microRNA			0.0497	VIM
miR-4720-3p (miRNAs w/seed GCUUAAG)	mature microRNA			0.0102	DUSP1,SH3BGRL3
mir-23	microRNA			0.00904	CCND1,SPP1	38 (8)
miR-145-5p (and other miRNAs w/seed UCCAGUU)	mature microRNA			0.0464	OTX2,SOX2,SOX9
miR-3102-5p.2-5p (miRNAs w/seed GUGGUGC)	mature microRNA			0.00221	MLLT11,TAGLN3,ZFP36L2
miR-3183 (and other miRNAs w/seed CCUCUCU)	mature microRNA			0.0451	FOS,SYP,TAGLN3
miR-186-5p (miRNAs w/seed AAAGAAU)	mature microRNA			0.0167	PTTG1,VIM
mir-186	microRNA			0.0158	PTTG1
mir-942	microRNA			0.000148	CCND1,VIM
miR-450b-5p (miRNAs w/seed UUUGCAA)	mature microRNA			0.0244	LUM,SOX2
miR-450b-3p (and other miRNAs w/seed UGGGAUC)	mature microRNA			0.00882	FABP7,FOSB,SOX2
miR-450a-5p (and other miRNAs w/seed UUUGCGA)	mature microRNA			0.00472	SOX2,SPP1,VIM
miR-3611 (miRNAs w/seed UGUGAAG)	mature microRNA			0.025	DUSP1,VXN
miR-3192-5p (miRNAs w/seed CUGGGAG)	mature microRNA			0.0487	FOSB,HES6,MCAM
mir-182	microRNA			0.0281	GADD45G,VIM
miR-4279 (miRNAs w/seed UCUCCUC)	mature microRNA			0.0253	FOS,FOSB,SOX4
miR-4327 (miRNAs w/seed GCUUGCA)	mature microRNA			0.00151	ATOH7,SOX2,SOX9
miR-4655-5p (miRNAs w/seed ACCGGGG)	mature microRNA			0.0383	HES4,RASD1
mir-944	microRNA			0.00635	VIM
MIR3662	microRNA			0.0158	CCND1
miR-3168 (miRNAs w/seed AGUUCUA)	mature microRNA			0.0375	TAGLN3
miR-3071-3p (miRNAs w/seed UCAUCAA)	mature microRNA			0.0361	JUN,SAT1
miR-1246 (miRNAs w/seed AUGGAUU)	mature microRNA			0.0199	CCNG2,VIM
miR-4751 (miRNAs w/seed GAGGACC)	mature microRNA			0.0138	EGR1,FAM89A,NRL
miR-638 (miRNAs w/seed GGGAUCG)	mature microRNA			0.0182	FOSB,SOX2
miR-4307 (miRNAs w/seed AUGUUUU)	mature microRNA			0.00072	CCND1,LUM,SCG3
miR-3622a-3p (and other miRNAs w/seed CACCUGA)	mature microRNA			0.0215	MCAM,SH3BGRL3
mir-3622	microRNA			0.00116	CCND1,GADD45A
miR-652-5p (miRNAs w/seed AACCCUA)	mature microRNA			0.032	GPM6B,H4C3
miR-144-3p (miRNAs w/seed ACAGUAU)	mature microRNA			0.0298	CCNG2,JUN,MYBL1
miR-578 (and other miRNAs w/seed UUCUUGU)	mature microRNA			0.00761	FAM162A,PLP1,SPP1
miR-207 (miRNAs w/seed CUUCUCC)	mature microRNA			0.0464	CCN1,NRL
miR-3177-5p (miRNAs w/seed GUGUACA)	mature microRNA			0.00846	ATOH7,BAMBI,SAT1
miR-1236-3p (miRNAs w/seed CUCUUCC)	mature microRNA			0.0374	CSRP2,FOSB,GPM6B
miR-719 (miRNAs w/seed UCUCGGC)	mature microRNA			0.0199	GPM6B,SOX2
miR-5132-5p (miRNAs w/seed CGUGGGG)	mature microRNA			0.0397	GADD45A,SYP
miR-711 (miRNAs w/seed GGACCCA)	mature microRNA			0.0281	NRL,TTYH1
miR-704 (miRNAs w/seed GACAUGU)	mature microRNA			0.0488	LUM,VXN
miR-4323 (miRNAs w/seed AGCCCCA)	mature microRNA			0.0284	MFNG,SRRM4,SYP
miR-3940-3p (miRNAs w/seed AGCCCGG)	mature microRNA			0.0269	FABP7,PMEPA1
miR-4474-5p (miRNAs w/seed UAGUCUC)	mature microRNA			0.0275	ID3,NEUROD4
miR-1181 (miRNAs w/seed CGUCGCC)	mature microRNA			0.00944	ID3,RASD1
MIR378I	microRNA			0.0158	VIM
miR-1203 (miRNAs w/seed CCGGAGC)	mature microRNA			0.00606	MCAM,RASD1,SFRP2
miR-219b-3p (miRNAs w/seed GAAUUGC)	mature microRNA			0.0472	FABP7,NEUROD1
miR-3152-5p (miRNAs w/seed UUGCCUC)	mature microRNA			0.0103	FOSB,RBP1,SH3BGRL3
miR-4666a-5p (miRNAs w/seed UACAUGU)	mature microRNA			0.048	CCNG2,PTF1A
mir-383	microRNA			0.0158	GADD45G
miR-686 (and other miRNAs w/seed UUGCUUC)	mature microRNA			0.0354	NEUROD4,OTX2
miR-519a-2-5p (and other miRNAs w/seed CUCUACA)	mature microRNA			0.0138	HES1,SPP1
MED15	transcription regulator			0.0283	CCND1
miR-659-3p (miRNAs w/seed UUGGUUC)	mature microRNA			0.0288	DUSP1,GADD45A
miR-3658 (miRNAs w/seed UUAAGAA)	mature microRNA			0.0107	FAM162A,RBP1
miR-4678 (miRNAs w/seed AGGUAUU)	mature microRNA			0.0327	DUSP1,GADD45A
miR-7036a-3p (miRNAs w/seed CGUCCUC)	mature microRNA			0.00347	GADD45G,SOX9,SYP
miR-7086-3p (miRNAs w/seed CCGUUCU)	mature microRNA			0.0368	H4C3,PLP1
NNMT	enzyme			0.0127	SYP
TLR2	transmembrane receptor			0.0253	DUSP1,FOS,GADD45A
ADAM12	peptidase			0.00177	JUNB,LUM,SFRP2
F2RL1	G-protein coupled receptor			0.0412	CCN1,FOS
KISS1	other			7.63e-05	EGR1,FOS,OTX2	35 (12)
HGS	other			4.56e-05	FOS,JUN,SOX2	42 (16)
PIK3CA	kinase			4.55e-05	CCND1,CD24,JUN,KDR,LUM,VIM	47 (21)
MAPK15	kinase			0.00951	JUN
PTN	growth factor			0.0233	NR4A1,SOX9
BMI1	transcription regulator			0.0193	BNIP3,VIM
MAEL	transcription regulator			0.022	SOX2
EGFL7	other			0.0189	HES1
F3	transmembrane receptor			0.00139	CCN1,EGR1,FOS	39 (15)
AGER	transmembrane receptor			0.0427	CCND1,EGR1
SMARCA1	transcription regulator			0.0252	GADD45A
KAT6A	enzyme			0.0256	SOX9,TF
ATOX1	transporter			0.00951	CCND1
SOX18	transcription regulator			0.0252	MCAM
FERMT2	other			0.0467	CCND1
GHRHR	G-protein coupled receptor			0.00102	CCND1,FOS	29 (7)
BLNK	other			0.0497	JUN
CBFA2T2	transcription regulator			0.0127	HES1
HTR1A	G-protein coupled receptor			0.0344	VIM
UBE2C	enzyme			0.0158	SOX2
SNRPB	other			0.022	CCND1
POU3F3	transcription regulator			0.0252	FABP7
SPRY4-IT1	other			0.0313	VIM
HPX	transporter			0.0497	SOX9
DKK2	other			0.000354	CCND1,SPP1	22 (4)
SFRP2	transmembrane receptor			0.0283	SOX2
NUCB2	other			0.0189	FOS
GUSB	enzyme			0.0283	CCN1
STRN	other			0.0252	VIM
GAS7	other			0.0158	SPP1
GDF9	growth factor			0.00652	ID1,ID3	16 (7)
PDE3A	enzyme			0.000207	CCND1,DUSP1
SS18	transcription regulator			0.00619	HES4,SOX2
MRAS	enzyme			0.000539	CCND1,VIM	46 (18)
LATS	group			0.0252	CCN1
SLC1A1	transporter			0.0189	FOS
GJA1	transporter			0.00026	CCND1,SPP1,VIM	50 (21)
HIF3A	transcription regulator			0.0406	SOX2
CSF2RA	transmembrane receptor			8.65e-06	FOS,JUN,JUNB	37 (17)
HOXB2	transcription regulator			0.00951	OTX2
FYN	kinase			0.000483	DUSP1,FOS,PLP1
POLE2	enzyme			0.000207	CCND1,VIM	43 (7)
IRAK4	kinase			2.12e-07	EGR1,FOS,FOSB,JUN,NR4A1,RGS16	47 (20)
CSK	kinase			0.0497	FOS
PRKCZ	kinase			0.00619	CCND1,JUN	42 (26)
MED16	transcription regulator			0.000761	CCN1,VIM
SNIP1	other			0.0375	CCND1
Irs3	other			0.0189	EGR1
RTN4	other			0.0152	JUN,TAGLN3
PTGER2	G-protein coupled receptor			0.0488	EGR1,SPP1
SFRP4	transmembrane receptor			0.000118	CCND1,SFRP2,VIM
TWIST2	transcription regulator			1.8e-05	CCND1,CD24,SOX2,VIM
POU4F1	transcription regulator			0.0488	NEUROD1,NEUROD4
ADAR	enzyme			0.0406	FOS
APAF1	other			0.0189	VIM
NPVF	other			0.00318	FOS
NCK1	kinase			0.0313	FOS
CYSLTR1	G-protein coupled receptor			0.0252	FOS
CALCR	G-protein coupled receptor			0.0158	FOS
PARP1	enzyme			0.00105	CCND1,FOS,HES1,JUN	49 (24)
MIR5590	microRNA			0.00635	VIM
RBM5-AS1	other			1.37e-05	CCND1,JUN,SOX2
HDAC3	transcription regulator			0.000423	CCND1,FOS,SPP1,VIM	49 (22)
miR-548au-3p (miRNAs w/seed GGCAGUU)	mature microRNA			0.0143	CCN1,GAS1,PRDM13
miR-5626-3p (and other miRNAs w/seed AGCAGUU)	mature microRNA			0.0275	GADD45A,VIM
miR-550b-2-5p (and other miRNAs w/seed UGUGCCU)	mature microRNA			0.0391	MLLT11,SRRM4,VXN
miR-1295b-3p (miRNAs w/seed AUAGGCC)	mature microRNA			0.0327	CCNG2,PMEPA1
miR-5624-5p (miRNAs w/seed AUUGUAA)	mature microRNA			0.0157	FABP7,ID1
SMARCD3	transcription regulator			0.00242	SOX2,SOX9
NKX2-1	transcription regulator			0.0218	PLP1,PRDM13,SOX2
GBP1	enzyme			0.0127	KDR
F10	peptidase			0.000886	CCN1,EGR1	20 (4)
ATN1	transcription regulator			1.1e-08	ATP1A3,MCAM,NEUROD1,RGS16,SOX11,SOX4,SPP1,TAGLN3
EPHB4	kinase			0.0133	KDR,PLP1
EMP3	other			0.0189	SOX2
PTH1R	G-protein coupled receptor			0.000144	CCND1,DUSP1,SPP1	37 (11)
DRD1	G-protein coupled receptor			9.25e-08	EGR1,FOS,FOSB,JUNB	43 (18)
TSC2	other			0.017	CCND1,EGR1,FOS
SEMA3A	other			0.000442	KDR,MCAM
MED1	transcription regulator			0.00544	CCND1,GADD45A,INSM1,SOX2
ANXA2	other			0.00524	GADD45A,JUN	26 (7)
NUP107	other			0.022	FOS
ANKH	transporter			5.96e-05	SOX9,SPP1	34 (7)
EEF1G	translation regulator			0.00318	VIM
TLE1	transcription regulator			1.1e-05	DUSP1,EGR1,FOS	31 (7)
FOXF1	transcription regulator			0.00465	CCND1,KDR
EMX2	transcription regulator			0.0252	SOX2
EIF2S1	translation regulator			0.0133	CCND1,GADD45A
NKX6-1	transcription regulator			0.0497	NR4A1
IGFBP5	other			0.00309	CCND1,EGR1	29 (7)
THBS2	other			0.0436	HES1
STK3	kinase			2.04e-05	CCND1,SOX4,SPP1	19 (3)
BORCS8-MEF2B	transcription regulator			0.00318	JUN
PIAS1	transcription regulator			0.00191	CCND1,GADD45A,SYP	41 (6)
TFCP2	transcription regulator			0.0497	SPP1
HCRT	other			0.000442	EGR1,FOS	41 (17)
TRPC1	ion channel			0.00333	CCND1,KDR
JUND	transcription regulator			7.25e-06	CCND1,NR4A1,SAT1,SOX4,SPP1
WIF1	other			0.0344	SFRP2
MAPK12	kinase			4.56e-05	CCND1,FOS,JUN	43 (20)
HEIH	other			0.000106	DUSP1,FOS,JUN	30 (7)
ETV1	transcription regulator			0.00465	SOX9,VIM
PER2	transcription regulator			0.0467	CCND1
SUMO1P3	other			0.000276	CCND1,VIM
H2AX	transcription regulator			0.0102	GADD45A,SFRP2
BSG	transporter			0.000577	CCND1,KDR,VIM	27 (6)
EGR4	transcription regulator			0.000276	EGR1,MYBL1
LCN2	transporter			0.0376	SPP1,VIM
TIAM1	other			0.0158	JUN
UTS2	other			0.0158	FOS
CDR2	other			0.0158	TF
HOXB3	transcription regulator			0.0344	OTX2
CCNDBP1	other			0.00635	CCND1
NCSTN	peptidase			0.00586	HES1,VIM
RBM14	transcription regulator			0.0158	CCND1
ZEB2	transcription regulator			0.0221	CCND1,VIM
SPRY2	other			0.00523	FABP7,FOS,SPP1	24 (7)
ATM	kinase			3.88e-06	CCND1,DUSP1,GADD45A,GADD45G,JUN	49 (21)
WNT5B	other			0.0344	CCND1
PLCB1	enzyme			0.000886	CD24,VIM
IRS2	enzyme			0.000975	CCND1,EGR1,FOS	41 (24)
HDAC7	transcription regulator			0.00263	CCND1,NR4A1	7 (2)
ALOX15	enzyme			0.0072	ID3,JUN	32 (7)
ANGPT1	growth factor			0.00944	CCND1,DUSP1	31 (12)
RB1CC1	other			0.0375	CCND1
HEXIM1	transcription regulator			0.00309	CCND1,VIM	8 (4)
PKM	kinase			0.0341	CCND1,EGR1
H2AB3 (includes others)	other			0.0115	FOS,GAS1
CYP4F2	enzyme			0.0283	KDR
SEPTIN9	enzyme			0.0158	CCND1
Nisch	other			0.0189	FOS
HDAC9	transcription regulator			0.00358	JUN,NR4A1	9 (5)
LINC-ROR	other			0.0436	SOX2
MACC1-AS1	other			0.022	SOX2
SGO1-AS1	other			0.0252	VIM
BANCR	other			0.022	CCND1
PTCSC3	other			0.0344	CCND1
DLEU2	other			0.0344	VIM
UBQLN1	other			0.0283	VIM
PENK	other			0.0158	FOS
TOB2	other			0.00318	CCND1
CX3CL1	cytokine			6.38e-07	CCND1,FABP7,NEUROD1,PLP1,SOX4,SPP1,SYP
WWP2	enzyme			0.00132	SOX2,VIM
DTX1	transcription regulator			0.00333	EGR1,SPP1	22 (7)
RALGDS	other			0.00951	CCND1
GNB2	enzyme			0.000222	DUSP1,FOSB,NR4A1
GNAO1	enzyme			0.022	FOS
RNF4	transcription regulator			0.0189	HES1
SRSF3	other			0.00132	CCND1,JUN
ELK4	transcription regulator			8e-07	EGR1,FOS,JUNB,NR4A1	33 (9)
MGA	transcription regulator			0.000975	BNIP3,CCND1,TF
LIPE	enzyme			0.0122	EGR1,FOS,NR4A1
SDC4	other			0.022	SOX9
ZBTB48	transcription regulator			0.00437	FOSB,SPP1
HOXC8	transcription regulator			0.00555	GAS1,SPP1
LGALS7/LGALS7B	other			0.0344	EGR1
SUB1	transcription regulator			2.12e-06	CCND1,FOS,GADD45A,STMN2
NCOA5	other			0.000611	GADD45G,MYBL1,NR4A1
IL9R	transmembrane receptor			0.0313	JUNB
FGF10	growth factor			0.00072	PTF1A,SOX2,SOX9
CLOCK	transcription regulator			0.000178	CCND1,FABP7,GADD45A,HES6,ID1,JUNB
VAV1	transcription regulator			0.00013	CCND1,FOS,JUN	50 (24)
RBP7	other			0.00318	RBP1
PTGER4	G-protein coupled receptor			0.0016	CCNG2,EGR1,SPP1,ZFP36L1
CRY2	enzyme			0.0406	FOS
BCAR1	other			0.000761	CCND1,EGR1	34 (7)
SELE	transmembrane receptor			0.0313	FOS
SCN1B	ion channel			0.000354	FOS,VIM
NPTX1	other			0.00951	SYP
GCLC	enzyme			1.23e-07	FOS,JUN,JUNB	29 (7)
FLOT1	other			0.0158	CCND1
GLI2	transcription regulator			4.09e-05	CCND1,JUNB,SOX9,SPP1,VIM	32 (9)
MAGED1	transcription regulator			0.0189	JUN
RUVBL2	transcription regulator			0.0344	CCND1
DLG4	kinase			0.0252	FOS
LNX2	other			0.000539	HES1,HES6
SERPINF1	other			0.0152	CCND1,VIM
ALK	kinase			0.0182	FOS,SOX2
RAD51AP1	other			0.022	SOX2
NR4A2	ligand-dependent nuclear receptor			0.00379	CCND1,JUN,SPP1	34 (7)
MBD3	other			0.0281	CCND1,SFRP2
SAFB2	other			0.00263	FOS,JUN	26 (7)
TOB1	transcription regulator			0.0102	CCND1,PCBP4
AATF	transcription regulator			0.0252	JUN
IL36G	cytokine			0.0215	DUSP1,JUN
GPI	enzyme			0.00148	CCND1,VIM
MGAT4A	enzyme			0.00951	CCND1
RETN	other			0.0172	FOS,SPP1
PDE4B	enzyme			0.000761	DUSP1,SOX2
DUSP1	phosphatase			0.0126	DUSP1,JUN,LUM
LIMA1	other			0.0344	VIM
NR5A1	ligand-dependent nuclear receptor			0.021	SOX9,VIM
P2RY1	G-protein coupled receptor			0.022	FOS
SART1	other			0.0344	SOX2
PTBP3	other			0.0283	VIM
WNT4	cytokine			3.07e-05	CCND1,GAS1,ID1,SPP1
TNFAIP2	other			0.0497	VIM
CCND2	other			0.022	CCND1
GALR1	G-protein coupled receptor			0.0127	CCND1
GHR	transmembrane receptor			0.0172	CCND1,SPP1
RNF111	enzyme			0.0189	PMEPA1
HDAC6	transcription regulator			0.000483	JUN,JUNB,VIM	42 (19)
MYBL2	transcription regulator			0.000683	CCND1,CCNG2,ID1
SOX1	transcription regulator			0.0227	DUSP1,HES1
MLH1	enzyme			0.000442	BNIP3,CCND1
TGFB1I1	transcription regulator			0.00263	FOS,ID1	29 (7)
EFEMP1	enzyme			0.0252	VIM
PML	transcription regulator			0.0162	CCND1,GADD45A,VIM
ARRB2	other			0.00685	EGR1,JUNB	41 (18)
PTX3	other			0.00652	FOS,JUN	29 (5)
ADRA1B	G-protein coupled receptor			1.66e-10	CCND1,CSRP2,DUSP1,EGR1,FOS,JUN,NR4A1	39 (20)
PAX5	transcription regulator			0.021	CCND1,VIM
PKNOX1	transcription regulator			0.00358	FABP7,KDR
MAPK10	kinase			0.00116	FOS,JUN	38 (14)
BCL6	transcription regulator			0.00735	CCND1,GADD45A,JUNB,SOX9	34 (7)
IFI16	transcription regulator			0.0301	CCND1,GADD45A
MECP2	transcription regulator			0.000389	EGR1,JUNB,NR4A1,PLP1,VIM	48 (22)
GNA12	enzyme			0.0269	FOS,VIM
ARHGEF25	other			0.0158	JUN
LDLR	transporter			0.00113	CCND1,DUSP1,EGR1,GADD45G,SPP1	52 (23)
ADRA1A	G-protein coupled receptor			1.54e-08	CSRP2,DUSP1,EGR1,FOS,JUN,NR4A1	42 (21)
MAOA	enzyme			0.000172	CCN1,CCND1,VIM	30 (7)
MFGE8	other			0.0467	CCND1
STIM1	ion channel			0.00145	JUNB,KDR,MYBL1	41 (7)
EIF2B1	translation regulator			0.00951	CCND1
PSAP	other			0.0158	CCND1
PIN1	enzyme			0.0281	CCND1,HES1
KCNE3	ion channel			0.00139	FOSB,NR4A1,PLP1
DES	other			0.0283	SPP1
ADRA1D	G-protein coupled receptor			9.39e-09	CSRP2,DUSP1,EGR1,FOS,JUN,NR4A1	49 (25)
HHEX	transcription regulator			0.0072	CCN1,KDR
HMMR	transmembrane receptor			0.000354	SOX2,VIM	30 (8)
FUT7	enzyme			0.022	CD24
TPH1	enzyme			0.00237	JUN,LUM,TF
PRSS8	peptidase			0.0283	CCND1
ITGB4	transmembrane receptor			0.00286	CCND1,VIM	38 (15)
RXRA	ligand-dependent nuclear receptor			0.00216	CCND1,FOS,GADD45G,RBP1,SAT1,SPP1	51 (23)
LAMA4	enzyme			0.0496	CCND1,SPP1
P2RY2	G-protein coupled receptor			9.57e-05	CCND1,JUN,TF	38 (15)
CLCA2	ion channel			0.0375	VIM
AHNAK	other			0.0127	CCND1
SP3	transcription regulator			4.89e-07	CCND1,DUSP1,EGR1,FOS,JUN,KDR,PTTG1,VIM	51 (23)
SYVN1	transporter			0.0116	CCND1,DUSP1,MCAM
MGAT3	enzyme			0.0497	HES1
NT5E	phosphatase			0.00263	KDR,SPP1
IL2RG	transmembrane receptor			0.00117	FOS,JUN,MFNG	32 (9)
ATF3	transcription regulator			0.0114	CCND1,ID1,JUN
CAPN3	peptidase			0.0467	DUSP1
FOXA2	transcription regulator			0.0279	CCND1,HES6,TF,VIM
NASP	other			0.0127	CCND1
AVP	other			0.000683	CCND1,EGR1,FOS	41 (21)
RGS4	enzyme			0.0383	KDR,SPP1
DIRAS3	enzyme			0.00116	CCND1,FOSB
NFYA	transcription regulator			9.11e-06	EGR1,GADD45A,JUN,JUNB,PTTG1	6 (2)
HSPA9	other			0.00755	HES1,VIM
PRKAR1A	kinase			0.00619	CCND1,VIM
SLC1A2	transporter			0.00318	FOS
NRAS	enzyme			0.032	CCND1,EGR1,KDR
GTPBP4	enzyme			0.00318	CCND1
SPHK1	kinase			0.00072	CCND1,EGR1,JUN	47 (27)
PORCN	enzyme			0.0158	CCND1
DAB1	other			0.022	FABP7
RAC2	enzyme			0.0119	FOS,NR4A1
AXIN1	other			0.00221	CCND1,FOS	45 (26)
TRAF4	other			3.95e-05	CCND1,JUN,SOX2	47 (21)
OGG1	enzyme			0.0467	VIM
TCF3	transcription regulator			0.000398	GADD45A,ID3,INSM1,JUN,NEUROD1,RGS16,TF
JAG2	growth factor			0.00685	HES1,SPP1
CTSB	peptidase			0.00437	CCND1,KDR	27 (6)
ARHGEF28	other			0.00635	FOS
DLGAP1	other			0.0158	VIM
PIK3R1	kinase			0.032	CCND1,FOS
AIF1	other			0.0436	CCND1
ARAF	kinase			0.000276	CCND1,FOS	46 (24)
SETD7	enzyme			0.000442	CCND1,SOX2
NRG2	growth factor			3.16e-11	BNIP3,CCN1,EGR1,FOSB,HES1,JUNB,NR4A1,SOX2	38 (7)
NPAT	transcription regulator			0.0344	H4C3
KIDINS220	transcription regulator			9.92e-05	EGR1,FOS
GPHB5	other			0.00318	FOS
IQGAP2	other			0.000886	CCND1,SFRP2
miR-6387 (miRNAs w/seed GGAAUGG)	mature microRNA			0.0404	SAT1,SH3BGRL3
miR-6344 (miRNAs w/seed UUUUCCU)	mature microRNA			0.00755	DAPL1,SOX2
MSH2	enzyme			0.0283	CCND1
KIF23	other			0.00951	CCND1
SOCS3	phosphatase			0.000283	CCND1,EGR1,FOS,JUN	41 (25)
NDRG2	other			0.000886	CD24,VIM
SCN7A	ion channel			0.00318	FOS
RNF7	enzyme			0.00318	JUN
MYOD1	transcription regulator			0.000157	DUSP1,GADD45A,GADD45G,HES6,JUNB,PMEPA1	39 (7)
DLL3	other			0.0127	HES1
IGFBP2	other			0.0142	CCND1,CD24
S100A4	other			0.00984	BNIP3,VIM
TRPC3	ion channel			0.0313	CCND1
KDM1A	enzyme			0.032	PTTG1,SFRP2,SOX2,VIM
PTAFR	G-protein coupled receptor			0.00263	MCAM,VIM
E2F3	transcription regulator			0.0195	CCND1,ID3,PTTG1
IGHM	transmembrane receptor			0.00652	CCNG2,JUN
ATF1	transcription regulator			0.000325	EGR1,FOS,JUN	31 (7)
IGFBP4	other			0.022	MCAM
NOG	growth factor			0.00072	ID3,KDR,SPP1	5 (3)
S1PR2	G-protein coupled receptor			0.00165	FOS,JUN	36 (12)
MAP2K7	kinase			0.0152	CCND1,JUNB
G3BP1	enzyme			0.000276	SOX2,SPP1
KCNQ2	ion channel			0.00951	SYP
GNAI2	enzyme			0.0041	BNIP3,CCND1
CARM1	transcription regulator			0.00904	FOS,GADD45A
PTPRR	phosphatase			0.0419	FOS,JUN
STRAP	other			0.00951	JUN
CSF1R	kinase			1.17e-05	CCND1,FOS,JUN,JUNB	40 (20)
LMO4	transcription regulator			0.0497	CCND1
LMNA	other			0.000391	BAMBI,CCNG2,ID3,JUN,MCAM,SPP1
CD3E	transmembrane receptor			0.00401	BNIP3,FOS,JUN	44 (22)
ACVRL1	kinase			0.00586	ID1,KDR
RASAL2	other			0.0252	VIM
RBL2	other			0.0434	CCND1,KPNA2
EZH2	transcription regulator			0.00351	CADPS,CCND1,EGR1,ID1,NEUROD1,SFRP2	36 (9)
CRH	cytokine			0.0017	FOS,JUNB,NR4A1	39 (17)
USP4	peptidase			0.000761	ID1,ID3
CLDN5	other			0.0127	CCND1
GRM5	G-protein coupled receptor			0.0313	FOS
ASF1A	other			0.0283	SOX2
MAP3K5	kinase			0.00221	CCND1,JUN	44 (20)
PPP2R2A	phosphatase			0.0436	SAT1
ACSL4	enzyme			0.0167	SAT1,SPP1
DGKZ	kinase			0.0406	CCND1
TAC1	other			0.00289	CCN1,FOS,FOSB	44 (18)
GUCY1A1	enzyme			0.00951	PCBP4
LCP2	other			0.00242	ID3,NR4A1
HOXA9	transcription regulator			0.00029	JUN,JUNB,SOX4,SPP1,VIM
FBXO32	enzyme			0.0294	CSRP2,GADD45A
RFC4	enzyme			0.000539	CCND1,SOX2
H3-3A/H3-3B	other			0.0497	EGR1
NOTCH2NLA/NOTCH2NLB	other			0.00318	HES1
DKK1	growth factor			0.0017	CCND1,SOX9,TTYH1	24 (5)
N4BP1	enzyme			0.00221	JUN,JUNB
MTA1	transcription regulator			0.0111	CCND1,SOX4
DIAPH1	other			0.0283	EGR1
DYNLL1	other			0.0189	FOS
ANKS1A	other			0.00318	FOS
KCNIP3	transcription regulator			0.00184	CCND1,FOS,FOSB	27 (4)
FZD5	G-protein coupled receptor			0.0252	SPP1
CDX2	transcription regulator			0.00218	JUN,NEUROD1,SOX2,SOX9	31 (7)
VEGFC	growth factor			0.0467	KDR
B4GALNT1	enzyme			0.0406	FOS
NME3	kinase			0.0158	VIM
RANBP9	other			3.65e-06	FOS,JUN,SYP	30 (7)
SOX10	transcription regulator			0.0111	FOS,PLP1
MMP3	peptidase			0.0449	EGR1,VIM
KIF1B	transporter			0.0467	CCND1
UBTF	transcription regulator			0.0127	CCND1
BACE1	peptidase			0.0375	PLP1
VIM	other			0.00286	MFNG,SOX2
CDCP1	other			0.000442	CCND1,VIM	35 (16)
IL25	cytokine			0.00117	FOSB,KDR,ZFP36L1
PTTG1IP	other			0.00951	CCND1
NKX3-1	transcription regulator			0.0142	FOS,SOX4
SIX3	transcription regulator			0.0283	CCND1
MAP2K6	kinase			0.025	CCND1,JUN
ATF7	transcription regulator			0.0252	DUSP1
PDIA3	peptidase			0.0127	CD24
CHRM4	G-protein coupled receptor			0.0127	EGR1
GAD1	enzyme			0.00635	FOS
SMARCA2	transcription regulator			0.0215	HES1,KDR
E2F4	transcription regulator			0.00635	BNIP3,CCND1,ID3,PTTG1
BCAR3	other			0.0158	CCND1
DLST	enzyme			0.00951	JUN
CEL	enzyme			0.0158	CCND1
CCNT1	transcription regulator			0.0375	CCND1
SND1	enzyme			0.000188	ID1,SOX4,VIM
SLC7A11	transporter			0.00102	SOX2,VIM
PRKAR2B	kinase			9.57e-05	EGR1,FOS,NR4A1	32 (11)
MAT2A	enzyme			0.0283	FOS
CDK6	kinase			0.00536	FOS,GADD45A,JUN	44 (12)
WNT7B	other			0.0252	CCND1
CTBP1	enzyme			0.0119	CCNG2,FOS
CD160	transmembrane receptor			0.000354	FOS,JUN
VANGL1	other			0.0283	JUN
TOR2A	other			0.00951	FOS
MAML3	transcription regulator			0.00635	HES1
SATB1	transcription regulator			0.00204	CCND1,FOSB,ID3,VIM
TRAF7	enzyme			0.0344	JUN
GDNF	growth factor			0.00158	CCND1,EGR1,FOSB	45 (23)
FOXD3	transcription regulator			0.0375	SOX2
FAS	transmembrane receptor			2.76e-05	EGR1,FOS,FOSB,GADD45G,JUN,LUM,NR4A1,SPP1	39 (19)
TP53INP1	other			0.0313	VIM
MIB1	enzyme			0.022	HES1
FBXO4	enzyme			0.00635	CCND1
BCLAF1	transcription regulator			0.00635	CCND1
VLDLR	transporter			0.0436	FOS
ASAH1	enzyme			0.0072	NR4A1,SOX9
ADORA2B	G-protein coupled receptor			0.000483	CCND1,SOX2,SPP1	43 (16)
LMX1A	transcription regulator			0.0406	HES1
GFRA2	transmembrane receptor			2.99e-05	EGR1,FOSB
FSCN1	other			0.0375	SOX9
TIAM2	enzyme			0.00635	VIM
CUL7	enzyme			0.0252	VIM
GATA3	transcription regulator			0.0464	CCND1,FOS,VIM
ABI1	other			0.0127	EGR1
NR1I2	ligand-dependent nuclear receptor			0.0243	EGR1,JUN,TF
SRPK2	kinase			0.00951	CCND1
SEMA6A	transmembrane receptor			9.92e-05	CCND1,KDR
RPS6KA2	kinase			0.00951	EGR1
NMU	other			0.00383	FOSB,ZFP36L1
NTRK1	kinase			9.58e-07	EGR1,FOS,GADD45A,NR4A1	42 (21)
GADD45A	other			0.00221	FOSB,JUN
SH2B2	other			0.0158	FOS
CCL5	cytokine			0.0263	DUSP1,FOS
GCNT1	enzyme			0.00951	FOS
PTPN11	phosphatase			2.94e-05	CCND1,EGR1,FOS,JUN,KDR	43 (19)
DNAJB6	transcription regulator			0.00132	SPP1,VIM	34 (7)
PTPRU	phosphatase			0.00318	CCND1
CLTC	other			0.0252	KDR
ACVR1B	kinase			0.0467	CCNG2
AFP	transporter			0.000539	EGR1,FOS
HES7	transcription regulator			0.00635	HES1
IKBKG	kinase			0.0103	FOS,JUNB,RGS16
MEOX2	transcription regulator			0.00685	ID1,ID3
OXTR	G-protein coupled receptor			0.0406	FOS
HK2	kinase			0.00148	SOX2,VIM
IL18	cytokine			0.00389	GADD45G,JUN,SPP1,TF	43 (20)
RELN	peptidase			0.0313	FABP7
AIP	transcription regulator			0.0138	DUSP1,RGS16
GPD1	enzyme			0.0361	CCND1,GADD45A
NINJ1	other			0.0252	SOX2
HBEGF	growth factor			0.0152	CCND1,EGR1
CTNNAL1	other			0.0127	CCND1
PAX4	transcription regulator			0.000886	INSM1,VIM
GATA6	transcription regulator			0.0302	HES1,OTX2,SOX2
PDK1	kinase			0.0193	ID3,VIM
CD200R1	transmembrane receptor			0.00117	EGR1,JUN,JUNB	47 (22)
MYRF	transcription regulator			0.0204	JUNB,PLP1
POU4F3	transcription regulator			0.00635	FOS
RRAS2	enzyme			0.00975	EGR1,HES1,RGS16
GABRG2	ion channel			0.00635	FOS
CXXC5	other			0.0189	KDR
ILKAP	phosphatase			0.00221	CCND1,NR4A1
LASP1	transporter			0.0252	VIM
NOS1	enzyme			0.00309	EGR1,FOS	46 (19)
MEF2A	transcription regulator			0.00253	FOS,JUN,NR4A1
MSI1	other			0.0375	HES1
ING2	transcription regulator			0.00635	SPP1
SPARC	other			0.00761	HES1,SOX9,VIM	36 (7)
PRMT2	enzyme			0.0158	CCND1
ZNF350	transcription regulator			0.00951	GADD45A
BMX	kinase			0.0436	FOS
ARRB1	transcription regulator			0.000325	EGR1,JUNB,SPP1	46 (21)
COMMD1	transporter			0.00286	BNIP3,TF
SLC1A5	transporter			0.0127	VIM
DDIT3	transcription regulator			0.00829	NRL,SOX2,VIM
USP37	peptidase			0.0283	STMN2
PINK1	kinase			0.000645	BNIP3,CCND1
KPNB1	other			0.00102	INSM1,SOX2
MAD2L1	other			0.000276	PTTG1,SOX9
SLC12A6	transporter			0.00951	VIM
NOTCH2	transcription regulator			0.0142	HES1,SOX9
CCKAR	G-protein coupled receptor			0.0127	EGR1
SMARCB1	transcription regulator			6.94e-05	BNIP3,CCND1,FOS,HES1,OTX2,SOX9	35 (11)
LAMC1	other			0.0436	VIM
ARNT2	transcription regulator			0.0284	EGR1,PLP1,ZFP36L1
TGFBR1	kinase			0.00681	CCND1,GAS1,VIM	8 (3)
FGF19	growth factor			1.4e-08	CCND1,EGR1,FOS,GADD45A,ID1,MCAM,RGS16	40 (21)
GNA13	enzyme			0.00221	EGR1,FOS	46 (22)
GNB1	enzyme			0.000885	DUSP1,FOSB,NR4A1
NFKB2	transcription regulator			0.012	CCND1,FOS,ZFP36L1
HOXA4	transcription regulator			0.000886	CCN1,CCND1	22 (5)
PRMT1	enzyme			0.0427	CCND1,VIM
NFATC1	transcription regulator			0.00635	CCND1,NEUROD1,SPP1	25 (7)
FAIM	other			0.00635	NR4A1
OTULIN	peptidase			9.92e-05	ID1,ID3	2 (2)
MAD2L2	enzyme			0.000442	EGR1,VIM
DDX17	enzyme			0.00132	CCND1,JUN
CEBPD	transcription regulator			0.048	CCND1,FOS
SOX21	transcription regulator			0.00951	SOX2
TDG	enzyme			0.0252	RBP1
CYP27B1	enzyme			0.00866	CCND1,SPP1	26 (7)
EIF2AK4	kinase			0.0128	EGR1,PLP1
F2RL3	G-protein coupled receptor			0.000148	EGR1,FOS
GPS1	other			0.0189	FOS
BIRC5	other			0.00076	LUM,PTTG1,VIM
BMPR1B	kinase			9.57e-05	ID1,ID3,SOX9	34 (15)
CMAHP	other			0.00951	VIM
COCH	other			0.0283	SOX2
ECT2	other			0.0189	CCND1
ENG	transmembrane receptor			0.0072	ID1,KDR	34 (7)
MECOM	transcription regulator			0.00437	GADD45G,SOX9
FASN	enzyme			0.021	SFRP2,VIM
FGF18	growth factor			0.0467	BAMBI
FOXC2	transcription regulator			0.000205	KDR,SOX9,SPP1,VIM
FOSL2	transcription regulator			0.0142	SOX4,SPP1
OSTM1	other			0.0344	FOS
CTAG1A/CTAG1B	other			0.00951	CCND1
KLB	enzyme			5.01e-06	CCND1,EGR1,FOS	39 (20)
HOXA5	transcription regulator			0.000399	EGR1,SAT1,VIM
IFRD1	other			0.00437	PTTG1,SPP1
Igkv1-117	other			0.000442	JUN,JUNB
IL2RB	transmembrane receptor			0.00116	FOS,JUN	32 (11)
ITGB3	transmembrane receptor			0.021	FOS,KDR
KDR	kinase			0.00984	KDR,NR4A1
KNG1	other			0.000144	CCND1,FOS,KDR	48 (22)
DKC1	enzyme			0.0252	VIM
MC1R	G-protein coupled receptor			0.0283	NR4A1
MNT	transcription regulator			0.000842	BNIP3,CCNG2,ID1
PMS2	enzyme			0.00318	CCND1
RASGRF1	other			0.0375	FOS
SHCBP1	other			0.000207	CCND1,SOX2	25 (7)
SIN3B	transcription regulator			0.00202	CCNG2,HES1
SOX15	transcription regulator			0.022	OTX2
SOX3	transcription regulator			0.00213	DUSP1,SOX2,SOX9
Sry	transcription regulator			0.0313	GADD45G
SRY	transcription regulator			0.0406	SOX9
SCUBE3	other			0.0283	VIM
ZNF507	transcription regulator			0.00358	CCND1,VIM
SPEN	transcription regulator			0.0127	HES1
EPGN	growth factor			0.00318	FOS
HSF4	transcription regulator			0.0375	VIM
ADGRE2	other			0.000222	CCND1,FOS,JUN	36 (7)
TAF4B	transcription regulator			0.0041	JUN,SPP1
PLAGL2	transcription regulator			0.0436	BNIP3
SP2	transcription regulator			0.00102	CCND1,FOS
TAX1BP3	transcription regulator			0.00318	FOS
RASSF10	other			0.0252	JUN
FZR1	kinase			0.0406	CCND1
NPFF	other			0.0436	ID3
SHANK3	other			0.0313	SYP
ADCYAP1R1	G-protein coupled receptor			0.022	FOS
Mir200	group			0.00242	JUN,SOX2
STX2	transporter			0.0189	CCND1
SNRK	kinase			0.0127	CCND1
POSTN	other			0.000373	HES1,SPP1,VIM	40 (10)
YBX3	transcription regulator			0.000354	CCND1,JUN
GRB10	other			0.000645	FOS,KDR
CCR4	G-protein coupled receptor			0.022	FOS
GABBR1	G-protein coupled receptor			0.00165	SPP1,VIM
ARHGEF2	other			0.0158	CCND1
ALPL	phosphatase			0.00951	SPP1
PRNP	other			0.000131	CCND1,EGR1,SOX9,SYP	33 (10)
PTCH1	transmembrane receptor			0.000222	CCND1,GADD45A,SOX9	6 (2)
NKX3-2	transcription regulator			0.022	SOX9
HTT	transcription regulator			8.27e-10	ATP1A3,CCND1,EGR1,FABP7,FOS,GADD45G,JUN,JUNB,MCAM,NEUROD1,NR4A1,OTX2,RGS16,SPP1,SYP,TAGLN3	49 (18)
RORB	ligand-dependent nuclear receptor			0.00318	NRL
RAMP3	G-protein coupled receptor			9.98e-06	FOS,VIM
MVP	other			0.00202	FOS,JUN	20 (5)
KITLG	growth factor			0.00954	EGR1,FOS,KDR,KPNA2	47 (22)
TAFAZZIN	enzyme			0.0144	CCN1,CCND1,DUSP1,LUM
S1PR1	G-protein coupled receptor			0.00202	CCND1,JUNB	34 (13)
PRKCB	kinase			6.99e-05	CCND1,EGR1,FOS,JUN	44 (21)
MME	peptidase			0.0127	SYP
MYCN	transcription regulator			0.0223	CCND1,CCNG2,JUNB,VIM
CDX1	transcription regulator			0.0182	CCND1,NEUROD1
ATP7A	transporter			0.0344	PLP1
FANCE	other			0.00318	HES1
TFF2	other			0.0189	CCND1
AIFM1	enzyme			0.0467	BNIP3
LAPTM5	other			0.000645	SOX2,SOX4
TP53BP2	other			0.0313	VIM
PPID	enzyme			0.0189	VIM
PTPN6	phosphatase			0.021	CCND1,VIM
PPP1CA	phosphatase			0.000354	FOS,SPP1	22 (7)
TRPV4	ion channel			0.00494	DUSP1,FOS	27 (7)
YWHAB	other			0.000207	CCND1,DUSP1
EIF5A2	translation regulator			0.0189	VIM
TRPA1	transporter			0.0313	FOS
GSTO1	enzyme			0.00117	SAT1,SOX4,ZFP36L1
KIRREL1	other			0.0252	CCN1
RTKN	other			0.000354	FOS,VIM
PDPK1	kinase			0.00828	CCND1,SOX2	45 (22)
PTTG1	transcription regulator			0.00221	CCND1,SOX2,VIM
PTHLH	other			0.00229	CCND1,FOS,SOX9	46 (22)
KRIT1	other			0.0406	JUN
CDK5	kinase			0.00555	JUN,PLP1	25 (7)
SMAD5	transcription regulator			0.00465	ID1,ID3
GTF2I	transcription regulator			1.37e-05	CCND1,FOS,KDR	29 (5)
RHO	G-protein coupled receptor			0.0215	FOS,NRL
EFNA1	other			0.0204	SOX9,UBE2S
PPP3CA	phosphatase			0.00327	SPP1,TF,VIM
IL11RA	transmembrane receptor			0.000577	FOS,JUNB,SOX2	27 (7)
RALA	enzyme			0.0436	CD24
PEA15	transporter			0.0313	JUN
CDC23	enzyme			0.00635	PTTG1
NR3C2	ligand-dependent nuclear receptor			0.0116	EGR1,JUNB,KDR
EEF2K	kinase			0.0189	VIM
PLAT	peptidase			0.000205	CCND1,FOS,JUN	48 (24)
RASSF7	other			0.00951	CCND1
SMARCC2	transcription regulator			0.0283	KDR
AKAP13	other			0.0127	FOS
SCX	transcription regulator			3.95e-05	ID1,SOX9,SPP1
GTF2IRD1	transcription regulator			0.000281	FOS,KDR,NRL	8 (3)
HIVEP3	transcription regulator			0.000539	JUN,JUNB	28 (7)
GRIN1	ion channel			0.0182	LUM,SOX11
VCAM1	transmembrane receptor			0.0158	CCND1
BCAT1	enzyme			0.00635	SOX2
CDK5R2	other			0.00951	FOS
VEGFD	growth factor			0.000761	CCND1,NR4A1
CAPNS1	peptidase			0.022	CCND1
RAPGEF4	other			0.022	SPP1
IL6ST	transmembrane receptor			0.000107	CCND1,EGR1,JUN,JUNB	45 (21)
CDC20	other			0.022	PTTG1
NOS2	enzyme			0.0231	BNIP3,KDR,SYP
DNMT3B	enzyme			0.0195	KDR,RGS16,SFRP2
MCAM	other			2.56e-06	CD24,ID1,VIM
Tnxa-ps1	other			0.00318	DUSP1
NEU3	enzyme			0.0252	EGR1
miR-6803-3p (miRNAs w/seed CCCUCGC)	mature microRNA			0.0464	PMEPA1,RASD1
miR-6941-3p (miRNAs w/seed UAACUCG)	mature microRNA			0.0436	PTF1A
miR-219c-3p (miRNAs w/seed GAGAAUU)	mature microRNA			0.0227	GADD45A,SAT1
miR-6814-3p (and other miRNAs w/seed CUCGCAU)	mature microRNA			0.0111	QDPR,RGS16
miR-7682-5p (miRNAs w/seed GGCACGA)	mature microRNA			0.0193	ID1,PRDM13
miR-4433b-3p (miRNAs w/seed AGGAGUG)	mature microRNA			0.0055	MLLT11,SFRP2,VIM
miR-8101 (miRNAs w/seed GCGAGCG)	mature microRNA			0.0107	ID1,ZFP36L1
miR-7233-5p (miRNAs w/seed GUUAGGG)	mature microRNA			0.0055	MFNG,PRSS35,SFRP2
miR-7112-5p (miRNAs w/seed CGGGCAG)	mature microRNA			0.0287	FOS,FOSB,HES4
miR-7212-3p (miRNAs w/seed AACACAC)	mature microRNA			0.00956	BNIP3,FAM131C,MCAM
miR-6753-5p (miRNAs w/seed ACCAGGG)	mature microRNA			0.028	GAS1,HES6,TAGLN3
miR-6758-5p (and other miRNAs w/seed AGAGAGG)	mature microRNA			0.0309	ATP1A3,DLL3,SH3BGRL3
miR-6858-3p (miRNAs w/seed AGCCAGC)	mature microRNA			0.0383	CSRP2,SH3BGRL3
miR-7975 (miRNAs w/seed UCCUAGU)	mature microRNA			0.0182	FABP7,PLP1
miR-7088-3p (miRNAs w/seed UGACCUU)	mature microRNA			0.0314	DAPL1,H4C3
miR-383-3p (miRNAs w/seed CAGCACU)	mature microRNA			0.0354	GPM6B,SCG3
miR-6732-3p (miRNAs w/seed AACCCUG)	mature microRNA			0.0233	BAMBI,SPP1
miR-6993-3p (miRNAs w/seed UUGCGUU)	mature microRNA			0.0157	SOX2,STMN2
miR-7678-5p (miRNAs w/seed UACAAGG)	mature microRNA			0.0383	PMEPA1,SH3BGRL3
miR-7663-5p (and other miRNAs w/seed CUGCUUG)	mature microRNA			0.0472	H4C3,SPP1
miR-7009-5p (miRNAs w/seed UGGGGUC)	mature microRNA			0.0425	ATOH7,RBP1,SYP
PAX9	transcription regulator			0.0375	SOX9
PTGFR	G-protein coupled receptor			0.00148	FOS,NR4A1	31 (7)
mir-24	microRNA			0.0138	KDR,NEUROD1
RND3	enzyme			3.95e-05	CCND1,HES1,VIM
[truncated: 299 more rows]

## Sheet: T1
Upstream Regulator	Molecule Type	Predicted Activation State	Activation z-score	p-value of overlap	Target Molecules in Dataset	Mechanistic Network
KAT2A	enzyme	Activated	2.383	8.52e-08	E2F1,H2AZ1,H4C3,HSP90AA1,JUN,MAD2L1,UBE2S	40 (11)
E2F3	transcription regulator	Activated	2.377	1.47e-05	E2F1,ID3,MAD2L1,PCLAF,PTMA,PTTG1
miR-124-3p (and other miRNAs w/seed AAGGCAC)	mature microRNA	Activated	2.2	0.000417	EGR1,HES1,LIMCH1,NEUROD1,SOX9,TF,VIM,ZFP36L2
ASCL1	transcription regulator	Activated	2.17	1.04e-11	DLL1,DLL4,E2F1,GADD45G,ID1,ID3,INSM1,NEUROD1,SOX9
Hdac	group	Activated	2.132	3.26e-08	DKK3,DLL1,EGR1,FOS,JUN,SFRP2,SPP1,WIF1	33 (18)
TOR1AIP1	other	Activated	2	7.05e-06	GADD45G,HES6,PBK,PCLAF
MED1	transcription regulator	Activated	2	0.000489	E2F1,GADD45A,INSM1,MAD2L1,PTMA
FOXA2	transcription regulator	Activated	2	0.00417	HES6,NEUROG2,TF,TRH,VIM
STK11	kinase	Activated	2	0.0126	GADD45A,ID1,SPP1,TTYH1
EPCAM	other	Activated	2	9.32e-06	EGR1,FOS,ID1,JUN	45 (21)
miR-4651 (and other miRNAs w/seed GGGGUGG)	mature microRNA		1.982	1	FOSB,ID3,TTYH1,ZFP36L1
COL18A1	other		1.98	0.000139	FOS,ID1,ID3,JUN	46 (24)
APC	enzyme		1.97	1.38e-05	HES1,ID1,ID3,JUN,SOX9,SPP1	40 (15)
MYOD1	transcription regulator		1.969	0.000899	GADD45A,GADD45G,HES6,PBK,PCLAF
PRKAA2	kinase		1.96	6.04e-05	E2F1,EGR1,TTYH1,VIM,ZFP36L1
PRDM1	transcription regulator		1.96	0.0116	FOS,ID3,PMAIP1,RGS16
NEUROG3	transcription regulator		1.953	0.000282	DLL1,DLL4,HES6,NEUROD1
APOE	transporter		1.951	0.000884	CCN1,EGR1,FOS,JUN,SOX9,SPP1	36 (24)
NR1H4	ligand-dependent nuclear receptor		1.948	0.00525	CCN1,FABP7,NEUROD1,SPP1	21 (7)
PCLAF	other		1.937	2.32e-06	E2F1,GADD45G,MAD2L1,PTTG1
FOSL1	transcription regulator		1.673	3.05e-07	CCN1,EGR1,FOS,FOSB,JUN,TF	40 (11)
TP73	transcription regulator		1.58	1.71e-05	CCN1,E2F1,EGR1,GADD45A,HES1,IDH2,PMAIP1,SAT1,SPP1	47 (19)
TLR4	transmembrane receptor		1.544	3.32e-05	BAMBI,CCN1,DLL4,FOS,GADD45G,IDH2,RGS16,SPP1	51 (20)
E2F1	transcription regulator		1.54	3.39e-06	E2F1,EGR1,FOS,HES1,ID3,MAD2L1,PCLAF,PMAIP1,PTTG1,VIM	43 (17)
BRCA1	transcription regulator		1.525	0.000216	EGR1,GADD45A,MAD2L1,SAT1,VIM	35 (7)
RARA	ligand-dependent nuclear receptor		1.497	1.04e-08	E2F1,EGR1,FOS,H4C3,JUN,MAD2L1,PBK,PTTG1,SPP1,TRH,UBE2T	25 (7)
IFNB1	cytokine		1.446	0.000268	DKK3,DLL1,E2F1,FOS,PMAIP1,SPP1	38 (16)
miR-1258-5p (and other miRNAs w/seed GCUGAGC)	mature microRNA		1.342	0.00695	DKK3,H4C3,TRPM3,TTYH1,VIM
SFTPA1	transporter		1.342	3.62e-06	CCN1,EGR1,FOS,FOSB,SFRP2	43 (13)
MYCN	transcription regulator		1.342	0.000465	DKK3,E2F1,PMAIP1,PTMA,TUBA1B,VIM
VHL	transcription regulator		1.231	7.6e-05	E2F1,MAD2L1,PMAIP1,VIM,ZFP36L1	36 (10)
miR-155-5p (miRNAs w/seed UAAUGCU)	mature microRNA		1.188	0.0135	CCN1,FOS,PMAIP1,VIM
DACH1	transcription regulator		1.154	7.05e-06	EGR1,FOS,ID1,JUN	31 (11)
KLF4	transcription regulator		1.106	6.44e-06	DLL1,DLL4,E2F1,GADD45A,HES1,ID3,TF,VIM
MYC	transcription regulator		1.069	3.69e-12	E2F1,EGR1,FOS,GADD45A,GADD45G,H2AZ1,HES1,HSP90AA1,ID1,ID3,IDH2,JUN,MAD2L1,PLP1,PMAIP1,PTMA,SAT1,SOX9,SPP1,TF,UBE2S,VIM,ZFP36L1	46 (20)
SALL4	transcription regulator		1.067	0.00174	CCN1,ID3,JUN,VIM
estrogen receptor	group		1.067	1.06e-05	EGR1,FOS,HSP90AA1,JUN,PMAIP1,SAT1,VIM	42 (22)
PITX2	transcription regulator		1.067	0.000933	EGR1,GADD45A,IDH2,VIM	26 (7)
IL27	cytokine		1	0.000981	EGR1,FOS,GADD45G,VIM	44 (22)
miR-1197 (and other miRNAs w/seed AGGACAC)	mature microRNA		1	0.0051	BAMBI,FABP7,PRSS35,TTC14
DICER1	enzyme		1	4.59e-05	CCN1,EGR1,FOS,HES1,ID3,JUN,VIM	50 (25)
TIMP3	other		1	1.54e-05	BAMBI,FOS,JUN,VIM	52 (24)
TCF4	transcription regulator		1	0.00427	HES1,ID3,MAD2L1,NEUROG2,SOX9
miR-6798-5p (miRNAs w/seed CAGGGGG)	mature microRNA		1	0.0362	FOSB,HES4,MFAP4,TTYH1
SSTR2	G-protein coupled receptor		0.842	1.61e-09	CCN1,FOS,GADD45A,JUN,RGS16,SAT1,SOX9,VIM	27 (5)
miR-4731-5p (miRNAs w/seed GCUGGGG)	mature microRNA		0.816	0.0257	FAM131C,FOSB,HES4,QDPR,SFRP2,SH3BGRL3
SCD	enzyme		0.788	0.000239	EGR1,FOS,GADD45A,JUN,SPP1	45 (23)
POU5F1	transcription regulator		0.712	2.76e-06	GADD45A,GADD45G,ID3,MIAT,OLIG2,PMAIP1,SPP1,TF,VIM	15 (2)
PTEN	phosphatase		0.699	8.3e-05	DKK3,DLL4,E2F1,FOS,IDH2,JUN,MAD2L1,SAT1,SPP1,VIM	49 (23)
PI3K (complex)	complex		0.692	0.00025	DLL4,E2F1,FOS,JUN,SOX9,SPP1	39 (23)
SPI1	transcription regulator		0.686	3.19e-05	E2F1,FOS,HES1,ID3,JUN,SPP1,VIM	42 (23)
RBPJ	transcription regulator		0.685	1.53e-07	DLL1,DLL4,FOS,HES1,JUN,NEUROD1,NEUROG2,SOX9	34 (16)
OGT	enzyme		0.6	2.37e-05	FOS,JUN,RGS16,VIM,WIF1	46 (17)
RET	kinase		0.594	6.94e-06	CLDN5,EGR1,FOS,HSP90AA1,INSM1,PMAIP1	26 (12)
GLI1	transcription regulator		0.559	6.12e-09	CCN1,EGR1,FOS,H4C3,HES1,ID1,ID3,PTTG1,SAT1,SOX9,SPP1,VIM,WIF1	51 (20)
PDX1	transcription regulator		0.557	1.79e-06	EGR1,ID1,ID3,JUN,NEUROD1,PMAIP1,SPP1	31 (11)
miR-17-5p (and other miRNAs w/seed AAAGUGC)	mature microRNA		0.544	0.0141	BAMBI,CCN1,E2F1,VIM
PRKCA	kinase		0.513	2.44e-06	EGR1,FOS,HES1,ID1,ID3,JUN	49 (22)
ZFP36	transcription regulator		0.489	8.98e-06	E2F1,FOS,JUN,PBK,SPP1	37 (16)
miR-5113 (and other miRNAs w/seed CAGAGGA)	mature microRNA		0.447	0.0103	DKK3,FABP7,H4C3,HSP90AA1,MIR9-1HG
KDM5B	transcription regulator		0.404	2.58e-07	E2F1,EGR1,GADD45A,LIMCH1,PBK,SAT1,SOX9
ARID1A	transcription regulator		0.391	0.000899	DLL4,HES1,SOX9,VIM,WIF1	28 (7)
FOXC1	transcription regulator		0.378	5.89e-07	DLL1,EGR1,FOS,FOSB,JUN,SOX9,SPP1	41 (15)
NFKB1	transcription regulator		0.369	3.23e-07	BAMBI,CCN1,DLL4,E2F1,EGR1,FOS,FOSB,GADD45A,SOX9	51 (24)
SP1	transcription regulator		0.359	2.13e-07	E2F1,EGR1,FOS,JUN,MYBL1,OLIG2,PMAIP1,PTTG1,SOX9,SPP1,TRH,VIM	46 (20)
KRAS	enzyme		0.359	1.43e-09	CCN1,E2F1,EGR1,FOS,FOSB,GADD45A,HES1,ID1,INSM1,JUN,PMAIP1,PTTG1,SOX9,SPP1,UBE2S,VIM,ZFP36L1	47 (20)
TP63	transcription regulator		0.359	1.36e-13	CCN1,DKK3,DLL1,E2F1,EGR1,FOS,FOSB,GADD45A,HES1,HSP90AA1,ID1,ID3,INSM1,JUN,MAD2L1,PMAIP1,SOX9,VIM	44 (22)
APLN	other		0.305	0.000145	DLL4,EGR1,FOS,VIM	33 (18)
RASSF1	other		0.277	8.53e-06	EGR1,FOS,HES1,SOX9,SPP1	41 (21)
ESR1	ligand-dependent nuclear receptor		0.26	8.06e-11	CCN1,DLL1,E2F1,EGR1,FOS,FOSB,GADD45G,H4C3,HES1,HSP90AA1,ID1,JUN,MAD2L1,PBK,PMAIP1,PTMA,PTTG1,RGS16,SOX9,SPP1,UBE2T,VIM	55 (21)
NR3C1	ligand-dependent nuclear receptor		0.252	0.00185	CCN1,CLDN5,EGR1,FOS,GADD45A,JUN,SPP1,VIM	48 (22)
STAT4	transcription regulator		0.246	0.000574	GADD45G,HES6,MGARP,RGS16,SAT1
RB1	transcription regulator		0.24	2.63e-06	E2F1,EGR1,FOS,FOSB,GADD45A,HES1,ID1,JUN,PCLAF,PTTG1	47 (26)
WNT1	cytokine		0.239	2.78e-10	DLL1,DLL4,EGR1,FOS,GADD45G,HES1,JUN,NEUROG2,SPP1	42 (23)
FOXO3	transcription regulator		0.224	9.33e-09	CCN1,EGR1,FOS,FOSB,GADD45A,ID1,PBK,PMAIP1,PTTG1,SOX9,VIM	51 (21)
CEBPB	transcription regulator		0.217	1.87e-06	E2F1,FOS,GADD45A,HSP90AA1,ID1,JUN,SAT1,SPP1,TF,UBE2S,VIM	47 (21)
Notch	group		0.146	0.000956	DLL4,HES1,ID1,ID3
ELAVL1	other		0.132	8.86e-05	CCN1,FOS,PBK,PTMA,SAT1,VIM
FOS	transcription regulator		0.129	0.000323	EGR1,FOS,FOSB,JUN,PTTG1,SFRP2,SPP1,VIM	48 (21)
MAPK9	kinase		0.111	0.000181	EGR1,FOS,GADD45A,HMGN2,JUN	42 (18)
BCL2	transporter		0.064	0.000302	FOS,GADD45A,SCG3,SOX9	43 (10)
CHUK	kinase		0.034	4.11e-05	E2F1,FOS,HES6,HSP90AA1,RGS16,SPP1	40 (7)
NFkB (complex)	complex		0.03	5.05e-08	BAMBI,CCN1,EGR1,FOS,GADD45A,JUN,MYBL1,PMAIP1,RGS16,SFRP2,SPP1,TRH,VIM	46 (24)
miR-19b-3p (and other miRNAs w/seed GUGCAAA)	mature microRNA		0	0.0257	BAMBI,LIMCH1,NEUROD1,PCLAF
STAT1	transcription regulator		0	0.00164	EGR1,FOS,HES1,JUN,NEUROD1,PMAIP1	48 (22)
DGCR8	enzyme		0	1.67e-05	EGR1,FOS,HES1,PLP1
HMG20A	transcription regulator		0	0.000324	CCN1,GADD45A,JUN,RGS16
SHH	peptidase		0	0.000289	ID1,OLIG2,SFRP2,SOX9,SPP1	30 (13)
HOXA10	transcription regulator		0	1.66e-05	CLDN5,HSP90AA1,ID1,IDH2,SAT1,SHD
IL5	cytokine		0	0.0105	EGR1,GADD45A,GADD45G,VIM
COPS5	transcription regulator		0	7.74e-05	E2F1,HMGB3,MAD2L1,PBK,SAT1,ZFP36L1
EGLN1	enzyme		0	6.06e-05	DLL1,DLL4,HES1,SOX9
miR-193b-5p (miRNAs w/seed GGGGUUU)	mature microRNA		0	0.027	LIMCH1,MAD2L1,TRH,ZFP36L1
miR-4779 (miRNAs w/seed AGGAGGG)	mature microRNA		0	0.029	FAM131C,FOSB,HES4,HES6
miR-3177-5p (miRNAs w/seed GUGUACA)	mature microRNA		0	0.000606	ATOH7,BAMBI,HMGN2,SAT1
miR-423-3p (miRNAs w/seed GCUCGGU)	mature microRNA		0	0.00185	DKK3,DLL1,PTMA,ZFP36L2
miR-3072 (and other miRNAs w/seed GCCCCCU)	mature microRNA		0	0.00633	HMGB3,HSP90AA1,ID1,PLP1,TTYH1,UBE2S
miR-3616-3p (miRNAs w/seed GAGGGCA)	mature microRNA		0	0.0304	GADD45A,HES4,HMGB3,PRSS35
HFE	transmembrane receptor		0	3.4e-05	EGR1,GADD45G,HSP90AA1,RGS16,TF
DNMT3A	enzyme		0	0.00298	E2F1,JUN,RGS16,SPP1
CST5	other		0	0.00901	ID3,PCLAF,PMAIP1,VIM
NR1I2	ligand-dependent nuclear receptor		0	0.00262	E2F1,EGR1,JUN,TF
HTT	transcription regulator		0	1.17e-06	DKK3,DLL1,EGR1,FABP7,FOS,GADD45G,JUN,MFAP4,NEUROD1,RGS16,SPP1,TRH	35 (15)
CD28	transmembrane receptor		0	0.0212	FOS,HMGN2,JUN,PTMA
miR-30c-5p (and other miRNAs w/seed GUAAACA)	mature microRNA		-0.017	0.00886	DLL4,HES1,JUN,NEUROD1,VIM
LEF1	transcription regulator		-0.053	0.00214	FOSB,HES1,SOX9,SPP1,VIM
SIRT1	transcription regulator		-0.059	0.000384	GADD45A,H2AZ1,ID1,IDH2,RGS16,SFRP2,VIM	38 (8)
FOXO1	transcription regulator		-0.095	1.6e-06	CLDN5,EGR1,FOS,FOSB,GADD45A,JUN,NEUROD1,PBK,PMAIP1,SOX9	36 (19)
ERBB2	kinase		-0.107	0.000251	DLL1,E2F1,EGR1,FOS,H4C3,HES1,ID1,JUN,MYBL1,VIM,ZFP36L2	50 (24)
IL17A	cytokine		-0.109	5.57e-05	CCN1,FOS,GADD45A,JUN,RGS16,SPP1,VIM	49 (23)
SOX2	transcription regulator		-0.111	2.76e-07	DKK3,DLL1,FABP7,FOS,ID3,JUN,OLIG2,PLP1,SPP1,TF,VIM	15 (2)
IL3	cytokine		-0.124	0.00352	EGR1,FOS,GADD45A,GADD45G,JUN	36 (17)
THRB	ligand-dependent nuclear receptor		-0.128	2.6e-07	E2F1,FOS,ID1,JUN,PTTG1,SFRP2,SPP1,TRH,WIF1	36 (20)
GATA4	transcription regulator		-0.152	1.39e-05	FOS,HES1,ID1,JUN,SOX9,SPP1,VIM
LDL	complex		-0.152	2.07e-05	DLL4,EGR1,FOS,FOSB,ID1,JUN,PMAIP1	41 (24)
IKBKB	kinase		-0.152	0.0135	EGR1,FOS,GADD45A,RGS16
STAT3	transcription regulator		-0.158	9.3e-09	DLL1,EGR1,FOS,GADD45A,GADD45G,ID1,ID3,JUN,MIAT,PMAIP1,PTTG1,SPP1,TRH,TRPM3,VIM	54 (26)
TP53	transcription regulator		-0.16	2.56e-14	CCN1,DKK3,E2F1,EGR1,FOS,GADD45A,GADD45G,H2AZ1,HES1,HMGN2,HSP90AA1,ID1,ID3,IDH2,JUN,MAD2L1,MYBL1,PBK,PCLAF,PMAIP1,PTTG1,QDPR,RGS16,SAT1,SFRP2,SPP1,TUBA1B,UBE2T,VIM,ZFP36L1	46 (18)
IL4	cytokine		-0.167	0.0361	CLDN5,FOS,FOSB,GADD45G,ID3,JUN,SPP1,VIM
miR-27a-3p (and other miRNAs w/seed UCACAGU)	mature microRNA		-0.186	0.00211	CLDN5,DLL4,FOSB,ID3,JUN,PMAIP1
YY1	transcription regulator		-0.2	4.11e-06	EGR1,FOS,GADD45G,H4C3,ID3,MAD2L1,PLP1,VIM	42 (11)
CD3	complex		-0.243	0.000566	BAMBI,FOS,HMGN2,HSP90AA1,ID3,JUN,PTMA,ZFP36L1	31 (11)
BCL3	transcription regulator		-0.254	4.05e-05	EGR1,FOS,ID1,JUN	45 (21)
CEBPA	transcription regulator		-0.267	0.00241	E2F1,FOS,GADD45A,ID1,JUN,SPP1	48 (23)
SIM1	transcription regulator		-0.277	0.000441	DLL1,EGR1,PLP1,TRH,ZFP36L1
Interferon alpha	group		-0.278	0.00734	E2F1,FOS,PBK,PMAIP1,SAT1,VIM	50 (21)
SPP1	cytokine		-0.299	3.33e-05	E2F1,FOS,JUN,SOX9,SPP1,VIM	46 (23)
TWIST1	transcription regulator		-0.305	0.00019	DKK3,FOS,SPP1,TF,VIM
IL2	cytokine		-0.311	0.000451	FOS,FOSB,GADD45G,JUN,MAD2L1,PMAIP1,RGS16,SPP1,VIM	41 (19)
PAX6	transcription regulator		-0.328	0.000396	ATOH7,DKK3,FABP7,HES1,TRPM3
OGA	enzyme		-0.378	0.000255	FABP7,GADD45A,GADD45G,JUN,SOX9,TRH,VIM	29 (7)
CASR	G-protein coupled receptor		-0.378	1.6e-07	EGR1,GADD45A,GADD45G,H2AZ1,ID1,MAD2L1,PTTG1
NFKBIA	transcription regulator		-0.388	9.59e-07	FOS,GADD45A,GADD45G,HES1,ID1,ID3,JUN,RGS16,SAT1,SOX9	45 (17)
TGFA	growth factor		-0.39	4.63e-06	E2F1,FOS,PTTG1,SOX9,VIM	42 (25)
NANOG	transcription regulator		-0.447	1.21e-05	E2F1,EGR1,FOS,FOSB,ID1,ID3	43 (5)
SREBF2	transcription regulator		-0.447	8.98e-06	CCN1,E2F1,FABP7,HES6,NEUROD1
MAP2K1	kinase		-0.462	4.36e-07	CCN1,E2F1,EGR1,FOS,JUN,OLIG2,PLP1,SOX9	40 (21)
Immunoglobulin	complex		-0.523	0.000245	EGR1,FOS,FOSB,IDH2,MAD2L1,RGS16,SAT1,SFRP2,SOX9,SPP1,ZFP36L2	34 (16)
Lh	complex		-0.555	0.000576	EGR1,FOS,GADD45G,JUN,PMAIP1,RGS16	36 (24)
miR-744-5p (and other miRNAs w/seed GCGGGGC)	mature microRNA		-0.555	0.0258	CLDN5,FOSB,HES4,RGS16,SH3BGRL3
SMAD7	transcription regulator		-0.577	0.00114	GADD45A,ID1,ID3,SOX9	40 (13)
NOTCH1	transcription regulator		-0.586	4.77e-11	CCN1,DLL1,DLL4,E2F1,FABP7,FOS,FOSB,HES1,ID1,NEUROD1,NEUROG2,SPP1	44 (19)
miR-200b-3p (and other miRNAs w/seed AAUACUG)	mature microRNA		-0.594	0.00234	HMGB3,PCLAF,PMAIP1,VIM
ID1	transcription regulator		-0.603	2.99e-06	E2F1,EGR1,NEUROD1,TF,VIM	36 (12)
AR	ligand-dependent nuclear receptor		-0.618	1.69e-06	DAPL1,EGR1,FABP7,GADD45G,MAD2L1,PBK,PLP1,PMAIP1,SOX9,SPP1,TF,VIM	50 (22)
SOX9	transcription regulator		-0.625	4.41e-05	DLL4,FOS,HES1,SOX9,WIF1	28 (7)
EPO	cytokine		-0.625	3.06e-07	EGR1,FOS,FOSB,H2AZ1,HMGN2,ID1,JUN,SPP1,TF	39 (20)
GH1	growth factor		-0.68	2.76e-09	EGR1,FOS,GADD45A,ID3,JUN,PTMA,SPP1,VIM	31 (19)
CSF3	cytokine		-0.692	0.00053	EGR1,FOS,GADD45A,GADD45G,JUN	33 (21)
TCF3	transcription regulator		-0.728	3.38e-05	GADD45A,ID3,INSM1,JUN,MAD2L1,NEUROD1,RGS16,TF
ID2	transcription regulator		-0.728	5.43e-05	DLL1,DLL4,GADD45G,ID3,SOX9,TF	10 (2)
MAPK7	kinase		-0.744	0.000127	CCN1,ID1,JUN,VIM	39 (20)
PGR	ligand-dependent nuclear receptor		-0.747	0.0143	CLDN5,FOS,HES1,ID1,MAD2L1
MSTN	growth factor		-0.762	6.4e-05	FOS,H4C3,SPP1,VIM	39 (17)
NTRK2	kinase		-0.762	1.53e-07	E2F1,EGR1,FOS,SOX9,SPP1,VIM	42 (21)
CDKN1A	kinase		-0.776	4.08e-09	CCN1,E2F1,GADD45A,H2AZ1,MAD2L1,PBK,PCLAF,SOX9,UBE2S,UBE2T,VIM	39 (8)
FSH	complex		-0.793	0.000211	FOS,FOSB,ID1,JUN,PMAIP1,RGS16,TF	38 (21)
NUPR1	transcription regulator		-0.816	0.00421	CCN1,GADD45A,SAT1,SPP1,VIM,ZFP36L1
IL6	cytokine		-0.849	2.12e-09	BAMBI,E2F1,EGR1,FOS,GADD45A,GADD45G,ID1,JUN,MAD2L1,MFAP4,PCLAF,PTTG1,SPP1,TF,TRH,VIM	51 (21)
Pka	complex		-0.853	6.46e-05	E2F1,EGR1,FOS,JUN,SOX9	46 (27)
CNTF	cytokine		-0.882	0.000441	EGR1,FOS,OLIG2,SPP1,VIM	38 (19)
MAPK14	kinase		-0.896	4.08e-06	DLL1,FOS,GADD45A,JUN,SOX9,SPP1,WIF1	36 (19)
P38 MAPK	group		-0.908	0.000133	CLDN5,EGR1,FOS,ID3,JUN,PMAIP1,SPP1	49 (21)
RELA	transcription regulator		-0.928	1.27e-05	E2F1,EGR1,FOS,FOSB,HES1,ID1,JUN,SOX9,VIM	51 (27)
Creb	group		-0.941	8.86e-07	CCN1,EGR1,FOS,FOSB,HES1,JUN,SOX9,TF,TRH	48 (17)
EGR1	transcription regulator		-0.943	2.38e-05	EGR1,GADD45A,ID1,JUN,MYBL1,SPP1	44 (17)
CDKN2A	transcription regulator		-0.95	1.25e-06	E2F1,EGR1,FOS,GADD45G,ID1,JUN,MAD2L1,PMAIP1,VIM	50 (23)
miR-4723-5p (and other miRNAs w/seed GGGGGAG)	mature microRNA		-0.971	0.0102	CLDN5,FAM131C,FOSB,H4C3,HES4,ID1,INSM1,NEUROG2,OLIG2,SH3BGRL3,ZFP36L1
Akt	group		-0.994	2.52e-05	DLL4,FOS,HES1,JUN,PMAIP1,SOX9,SPP1,VIM	43 (23)
ADRB	group		-1	0.000842	E2F1,FOS,GADD45A,JUN	38 (22)
miR-3093-5p (miRNAs w/seed GCACCCC)	mature microRNA		-1	0.0036	FOSB,HES6,SHD,VSTM2B
miR-3667-3p (miRNAs w/seed CCUUCCU)	mature microRNA		-1	0.00582	GADD45A,GADD45G,MYBL1,QDPR
CX3CR1	G-protein coupled receptor		-1	0.00193	EGR1,FOS,NEUROD1,TF
LEPR	transmembrane receptor		-1	0.00282	FOS,GADD45G,PLP1,TRH
ARNT2	transcription regulator		-1	0.00325	DLL1,EGR1,PLP1,ZFP36L1
miR-7017-3p (miRNAs w/seed CCCUGCU)	mature microRNA		-1	0.00288	H4C3,JUN,MFAP4,PCLAF
NGF	growth factor		-1.029	1.11e-06	BAMBI,EGR1,FOS,GADD45A,GADD45G,ID1,ID3,JUN	48 (22)
PSEN1	peptidase		-1.04	2.27e-05	DLL1,EGR1,FOS,HES1,HSP90AA1,PMAIP1,QDPR,TUBA1B	43 (18)
RAF1	kinase		-1.054	3.85e-06	E2F1,EGR1,FOS,HMGB3,ID3,JUN,ZFP36L2	39 (23)
Ige	complex		-1.067	0.0171	EGR1,RGS16,SPP1,VIM
SLC15A4	transporter		-1.067	0.000679	FOS,PBK,SAT1,VIM
MAC	complex		-1.067	2.03e-06	EGR1,RGS16,SOX9,SPP1	28 (7)
PPARD	ligand-dependent nuclear receptor		-1.067	0.00199	EGR1,FABP7,FAM131C,PLP1,SAT1
TFAP4	transcription regulator		-1.067	1.31e-05	EGR1,FOS,ID1,VIM
WNT5A	cytokine		-1.067	0.00573	DLL1,ID3,SPP1,VIM
miR-374c-5p (and other miRNAs w/seed UAAUACA)	mature microRNA		-1.067	0.000737	GADD45A,HES1,PMAIP1,PTTG1
PTCH1	transmembrane receptor		-1.067	4.21e-06	DLL1,DLL4,GADD45A,SOX9
TCF7L2	transcription regulator		-1.098	6.03e-07	BAMBI,FOS,ID1,ID3,JUN,OLIG2,PLP1,SOX9,SPP1,VIM	50 (23)
Mapk	group		-1.103	1.75e-05	EGR1,FOS,JUN,OLIG2,SPP1	37 (19)
FOXC2	transcription regulator		-1.103	0.000151	DLL1,SOX9,SPP1,VIM	29 (7)
miR-291a-3p (and other miRNAs w/seed AAGUGCU)	mature microRNA		-1.109	0.00019	E2F1,FOSB,MYBL1,OLIG2,PBK,VIM
FHL2	transcription regulator		-1.131	2.58e-05	CLDN5,JUN,SOX9,SPP1	38 (13)
AKT1	kinase		-1.153	3.01e-06	E2F1,EGR1,FOS,FOSB,PLP1,PMAIP1,SPP1,VIM	48 (23)
SMARCA4	transcription regulator		-1.16	5.74e-07	BAMBI,DLL1,E2F1,EGR1,FOS,GADD45A,GADD45G,ID3,JUN,OLIG2,SPP1,VIM	45 (19)
TCR	complex		-1.163	1.57e-05	EGR1,FOS,GADD45G,ID3,IDH2,JUN,PMAIP1,SPP1	45 (26)
WNT3A	cytokine		-1.171	1e-05	CCN1,GADD45G,ID1,JUN,SFRP2,SOX9,VIM,WIF1	48 (16)
F7	peptidase		-1.172	6.39e-06	CCN1,EGR1,FOS,GADD45A	42 (17)
JAG1	growth factor		-1.184	6.75e-05	GADD45A,HES1,SPP1,VIM	28 (7)
TNFSF11	cytokine		-1.193	0.0104	FOS,JUN,RGS16,SPP1
miR-3103-5p (and other miRNAs w/seed GAGGGAG)	mature microRNA		-1.195	0.0299	FAM131C,FOSB,HES6,MFAP4,SH3BGRL3,VXN,ZFP36L1
GNRH	group		-1.203	4.69e-06	EGR1,FOS,JUN,SCG3	35 (21)
JUN	transcription regulator		-1.205	1.97e-05	CCN1,FABP7,FOS,GADD45A,HES1,JUN,SPP1,TF,VIM	45 (26)
GNAS	enzyme		-1.213	0.000195	CCN1,FOS,GADD45G,SCG3,SPP1
SMAD4	transcription regulator		-1.231	0.00205	FOS,GADD45A,ID1,MAD2L1,VIM	47 (21)
MEF2C	transcription regulator		-1.242	3.75e-08	FABP7,FOS,FOSB,JUN,OLIG2,PLP1,SFRP2,VIM	20 (7)
LEP	growth factor		-1.253	3.22e-07	CCN1,DLL4,EGR1,FOS,GADD45A,HES1,JUN,PLP1,SPP1,TRH,VIM	46 (21)
miR-669c-3p (and other miRNAs w/seed ACACACA)	mature microRNA		-1.254	0.0198	E2F1,H1-3,H4C3,PCLAF,PTTG1,SAT1,TRPM3
MAPK8	kinase		-1.262	0.000211	EGR1,FOS,GADD45A,JUN,TRH	42 (18)
CD40LG	cytokine		-1.264	2.76e-06	EGR1,FOS,FOSB,GADD45A,HSP90AA1,ID3,JUN,PMAIP1,ZFP36L1	40 (23)
TNF	cytokine		-1.264	3.41e-09	BAMBI,CCN1,CLDN5,DLL4,E2F1,EGR1,FOS,FOSB,GADD45A,GADD45G,HES1,ID1,ID3,IDH2,JUN,NEUROD1,PLP1,PMAIP1,RGS16,SAT1,SOX9,SPP1,TF,VIM	48 (24)
YAP1	transcription regulator		-1.274	4.07e-06	CCN1,E2F1,EGR1,FOS,GADD45A,ID1,LIMCH1,PMAIP1,SOX9,VIM	46 (16)
ERK1/2	group		-1.275	2.61e-08	E2F1,EGR1,FOS,FOSB,ID1,ID3,JUN,OLIG2,SOX9,SPP1	48 (24)
MET	kinase		-1.279	6.24e-05	FOS,JUN,MAD2L1,SPP1,VIM	40 (21)
ERK	group		-1.28	0.000853	EGR1,FOS,JUN,PMAIP1,ZFP36L1	45 (19)
MYD88	other		-1.293	6.73e-06	BAMBI,CCN1,DLL4,EGR1,FOS,JUN,SOX9,SPP1	44 (23)
SRF	transcription regulator		-1.297	1.27e-05	CLDN5,EGR1,FOS,FOSB,GADD45A,GADD45G,HES6,JUN	28 (11)
APP	other		-1.328	1.13e-06	CLDN5,EGR1,FOS,FOSB,HES1,HSP90AA1,JUN,NEUROD1,NEUROG2,PMAIP1,QDPR,SOX9,TUBA1B,ZFP36L1	41 (19)
VEGFA	growth factor		-1.333	1.2e-10	CCN1,CLDN5,DLL1,DLL4,E2F1,EGR1,FOS,FOSB,HES1,ID1,ID3,SPP1	49 (22)
Pkg	group		-1.342	6.15e-09	EGR1,FOS,FOSB,JUN,SOX9	44 (24)
miR-6515-5p (miRNAs w/seed UGGAGGG)	mature microRNA		-1.342	0.00822	CLDN5,E2F1,HES4,UBE2S,VSTM2B
FGFR2	kinase		-1.342	4.91e-05	DLL1,HES1,NEUROG2,PLP1,SPP1
DDB1	other		-1.342	3.05e-08	CCN1,E2F1,EGR1,FOS,ID3
GSK3B	kinase		-1.342	4.41e-05	CLDN5,DLL1,FOS,NEUROD1,SPP1	30 (16)
FGF2	growth factor		-1.352	6.45e-15	BAMBI,CCN1,DLL1,DLL4,EGR1,FOS,GADD45A,HES1,ID3,JUN,NEUROD1,OLIG2,PTTG1,SFRP2,SOX9,SPP1,TF,VIM	41 (22)
EGFR	kinase		-1.359	1.16e-08	E2F1,EGR1,FABP7,FOS,GADD45A,HMGB3,ID1,INSM1,JUN,PBK,SOX9,UBE2S,VIM	45 (20)
EGF	growth factor		-1.377	1e-17	CCN1,E2F1,EGR1,FABP7,FOS,FOSB,GADD45A,HES1,ID1,JUN,MAD2L1,NEUROD1,OLIG2,PBK,PTTG1,SFRP2,SOX9,SPP1,TF,TRH,VIM,ZFP36L2	45 (22)
PRKCE	kinase		-1.387	3.62e-06	CCN1,E2F1,EGR1,FOS,JUN	39 (22)
TREM1	transmembrane receptor		-1.387	0.000303	EGR1,HES1,HES4,RGS16,SPP1
NR4A1	ligand-dependent nuclear receptor		-1.387	0.00025	CLDN5,E2F1,ID1,IDH2,NEUROD1,SAT1
VDR	transcription regulator		-1.405	9.18e-08	EGR1,GADD45A,GADD45G,H2AZ1,ID1,JUN,MAD2L1,MEG3,SPP1	49 (16)
MRTFA	transcription regulator		-1.406	0.000431	CCN1,EGR1,FOS,GADD45A,ID1	29 (10)
MRTFB	transcription regulator		-1.408	0.000276	CCN1,EGR1,GADD45A,ID1,LIMCH1	26 (7)
HES1	transcription regulator		-1.409	1.17e-06	DLL1,E2F1,HES1,NEUROD1,SPP1
TFEB	transcription regulator		-1.412	0.00205	FOS,JUN,PTTG1,SPP1,VIM	8 (2)
miR-149-3p (and other miRNAs w/seed GGGAGGG)	mature microRNA		-1.414	0.0274	FAM131C,FOSB,HES4,HES6,MFAP4,SH3BGRL3,SHD,TRH
MAPK1	kinase		-1.42	2.11e-06	E2F1,EGR1,FOS,FOSB,JUN,RGS16,SFRP2,SPP1,VIM	44 (21)
BDNF	growth factor		-1.46	5.68e-08	CCN1,EGR1,FOS,FOSB,JUN,PLP1,SFRP2,SPP1,TRH,VIM	51 (20)
miR-3083-5p (and other miRNAs w/seed GGCUGGG)	mature microRNA		-1.463	0.0445	E2F1,FAM131C,FOSB,HES6,ID3,MFAP4,SH3BGRL3,TRH
AHR	ligand-dependent nuclear receptor		-1.463	2.54e-05	E2F1,FOS,GADD45A,HES1,HSP90AA1,JUN,SOX9,SPP1,VIM	47 (22)
F2	peptidase		-1.481	1.25e-07	CCN1,DKK3,EGR1,FOS,FOSB,HSP90AA1,JUN,PMAIP1,UBE2S	46 (25)
ADCYAP1	other		-1.497	5.11e-07	EGR1,FOS,H2AZ1,ID3,IDH2,NEUROD1,TRH,TTYH1
miR-16-5p (and other miRNAs w/seed AGCAGCA)	mature microRNA		-1.501	0.0243	DLL1,GADD45G,JUN,MYBL1,TTC14,UBE2S
ESR2	ligand-dependent nuclear receptor		-1.51	0.000106	BAMBI,CCN1,EGR1,FOS,LIMCH1,MAD2L1,NEUROG2,PMAIP1,SPP1,VIM	52 (26)
IL1B	cytokine		-1.539	6.26e-09	BAMBI,DLL1,DLL4,E2F1,EGR1,FOS,FOSB,GADD45A,HES1,ID3,JUN,NEUROD1,RGS16,SAT1,SOX9,SPP1,TRH,VIM	43 (22)
HRAS	enzyme		-1.541	1.27e-07	CCN1,DLL1,E2F1,EGR1,FOS,FOSB,GADD45G,HES1,HSP90AA1,JUN,NEUROG2,SPP1,VIM	48 (22)
SMAD3	transcription regulator		-1.552	6.17e-06	EGR1,FOS,ID1,ID3,JUN,SPP1,TF,VIM	42 (26)
IGF1	growth factor		-1.578	1.78e-12	CCN1,E2F1,EGR1,FOS,FOSB,GADD45A,GADD45G,ID1,JUN,PBK,PLP1,PTTG1,SPP1,TF,VIM,ZFP36L1,ZFP36L2	46 (24)
miR-1249-5p (and other miRNAs w/seed GGAGGGA)	mature microRNA		-1.584	0.0204	E2F1,FAM131C,FOSB,HES6,MFAP4,SH3BGRL3,UBE2S,VSTM2B,ZFP36L1
EGR2	transcription regulator		-1.628	0.0103	EGR1,FOS,ID3,JUN
NPM1	transcription regulator		-1.633	5.42e-07	BAMBI,CCN1,DLL1,E2F1,EGR1,JUN,ZFP36L1
AGT	growth factor		-1.663	1.05e-07	DKK3,DLL4,E2F1,EGR1,FOS,HES1,ID3,JUN,MAD2L1,MFAP4,MYBL1,SFRP2,SPP1,VIM,WIF1	50 (23)
HMGA1	transcription regulator		-1.673	1.88e-05	CCN1,EGR1,FOS,ID3,TRH,VIM	46 (18)
IFNG	cytokine		-1.676	5.39e-05	DLL1,E2F1,EGR1,FOS,FOSB,HES1,HSP90AA1,ID1,JUN,NEUROD1,PBK,PMAIP1,SPP1,TRH,VIM	45 (21)
MEF2D	transcription regulator		-1.686	7.5e-05	FOS,FOSB,JUN,VIM	28 (8)
FGFR1	kinase		-1.709	3.79e-09	DLL1,FOS,HES1,JUN,MFAP4,NEUROG2,PLP1,VIM	36 (17)
PDGF BB	complex		-1.712	6.41e-09	CCN1,EGR1,FOS,FOSB,GADD45A,HES1,ID3,JUN,PRSS35,SAT1,ZFP36L1	42 (18)
THRA	ligand-dependent nuclear receptor		-1.718	1.21e-05	E2F1,FOS,JUN,PTTG1,SFRP2,TRH	47 (26)
CXCL12	cytokine		-1.72	2.06e-07	DLL4,EGR1,FOS,HES1,ID1,JUN,TF,VIM	49 (26)
CREB1	transcription regulator		-1.796	1.23e-08	CCN1,EGR1,FOS,FOSB,GADD45A,GADD45G,ID1,JUN,NEUROD1,SAT1,TF,TRH,VIM	50 (22)
RAS	group		-1.807	0.000642	EGR1,FOS,JUN,VIM	34 (22)
Jnk	group		-1.815	4.67e-05	EGR1,FOS,FOSB,GADD45A,HES1,JUN	50 (23)
NRG1	growth factor		-1.82	4.85e-10	CCN1,E2F1,EGR1,FOS,FOSB,HES1,ID1,JUN,TF,VIM,ZFP36L2	48 (22)
Vegf	group		-1.824	3.97e-07	CCN1,DLL4,EGR1,FOS,FOSB,HES1,ID1,JUN,MAD2L1,PMAIP1,VIM	41 (23)
PRL	cytokine		-1.842	2.54e-09	CLDN5,EGR1,FOS,HES1,ID1,ID3,JUN,SFRP2,SPP1,TUBA1B,VIM	43 (23)
HGF	growth factor		-1.878	2.93e-07	CCN1,EGR1,FOS,FOSB,HES1,ID1,JUN,MAD2L1,PTTG1,SPP1,VIM	43 (20)
Insulin	group		-1.896	0.00114	EGR1,FOS,FOSB,HES1,HSP90AA1,JUN,TF,VIM	45 (23)
miR-486-3p (and other miRNAs w/seed GGGGCAG)	mature microRNA		-1.912	0.114	ATOH7,DLL4,E2F1,FAM131C,HES4,TRH,VXN
MAP3K8	kinase		-1.93	0.00122	EGR1,FOS,JUN,MAD2L1	35 (22)
INS	other		-1.93	1.17e-05	CCN1,EGR1,FOS,FOSB,JUN,SOX9	30 (19)
GPER1	G-protein coupled receptor		-1.933	9.54e-10	CCN1,EGR1,FOS,FOSB,JUN,RGS16,SFRP2	38 (21)
CAV1	transmembrane receptor		-1.934	0.00119	EGR1,FOS,ID1,VIM	47 (22)
IL1	group		-1.94	0.0204	EGR1,FOS,JUN,SOX9
CSF1	cytokine		-1.94	0.0222	EGR1,FOS,JUN,SPP1
SNAI2	transcription regulator		-1.944	0.000151	CCN1,HES6,SOX9,VIM	27 (9)
FGF1	growth factor		-1.947	1.12e-07	CCN1,DLL1,EGR1,FOS,GADD45G,JUN,SPP1	33 (22)
CTNNB1	transcription regulator		-1.952	7.87e-10	BAMBI,CCN1,CLDN5,DLL4,EGR1,FOS,GADD45G,HES1,ID1,ID3,JUN,NEUROD1,PRSS35,SOX9,SPP1,TRH,VIM,WIF1	39 (20)
PTH	other		-1.952	1.47e-05	FOS,FOSB,JUN,SFRP2,SPP1,WIF1	34 (20)
ERG	transcription regulator		-1.954	0.00134	FOSB,GADD45A,SOX9,SPP1,VIM	30 (12)
Il3	cytokine		-1.958	7.5e-05	EGR1,FOS,SOX9,SPP1	38 (21)
IPMK	kinase		-1.961	2.58e-05	CCN1,FOS,FOSB,JUN	33 (16)
MAP2K1/2	group		-1.963	8.72e-05	EGR1,FOS,JUN,VIM	50 (23)
BMP10	growth factor		-1.964	0.000171	FOS,ID1,ID3,SOX9	4 (2)
Pdgf (complex)	complex		-1.98	0.000226	EGR1,FOS,FOSB,JUN	26 (19)
FN1	enzyme		-1.98	0.000431	CCN1,FOS,SOX9,SPP1,VIM	31 (18)
CHRM1	G-protein coupled receptor		-1.981	4.8e-08	CCN1,EGR1,FOS,JUN	36 (20)
HIF1A	transcription regulator		-1.982	4.71e-05	CCN1,DLL4,FOS,HES6,ID1,JUN,PMAIP1,SOX9,VIM	40 (21)
Mek	group		-1.985	7.08e-05	EGR1,FOS,ID1,JUN,NEUROG2,PMAIP1,VIM	46 (21)
GNRH1	other		-1.993	4.05e-05	EGR1,FOS,FOSB,JUN	31 (19)
F2R	G-protein coupled receptor		-1.996	0.000243	CCN1,EGR1,FOS,VIM	42 (22)
MKNK1	kinase	Inhibited	-2	1.42e-05	CCN1,EGR1,FOS,FOSB,TF,VIM	23 (7)
GLI3	transcription regulator	Inhibited	-2	0.000209	DLL1,EGR1,FOSB,SOX9
miR-874-5p (miRNAs w/seed GGCCCCA)	mature microRNA	Inhibited	-2	0.173	FAM131C,OLIG2,PMAIP1,PTTG1
miR-329-3p (and other miRNAs w/seed ACACACC)	mature microRNA	Inhibited	-2	0.0089	E2F1,H4C3,PCLAF,PTTG1
miR-7020-5p (miRNAs w/seed GGGAUGG)	mature microRNA	Inhibited	-2	0.0184	H4C3,HES6,MAD2L1,VXN
STAT5B	transcription regulator	Inhibited	-2	0.0228	FOS,GADD45A,JUN,TF
EPHA2	kinase	Inhibited	-2	8.51e-06	EGR1,FOS,FOSB,JUN	35 (20)
cytokine	group	Inhibited	-2	0.00114	CCN1,EGR1,FOS,JUN	29 (21)
CG	complex	Inhibited	-2.027	4.12e-05	BAMBI,E2F1,EGR1,FOS,JUN,LIMCH1,PMAIP1,SFRP2,SPP1	49 (21)
BMP2	growth factor	Inhibited	-2.046	4.87e-06	FOS,FOSB,ID1,ID3,JUN,SOX9,SPP1	40 (21)
Pkc(s)	group	Inhibited	-2.072	4.79e-05	CCN1,EGR1,FOS,GADD45A,JUN,SPP1	42 (18)
ELK1	transcription regulator	Inhibited	-2.143	3.4e-06	EGR1,FOS,FOSB,JUN,SPP1	37 (19)
GDF2	growth factor	Inhibited	-2.166	6.24e-05	BAMBI,FOS,ID1,ID3,SPP1	27 (8)
MAPK3	kinase	Inhibited	-2.176	7.05e-07	E2F1,EGR1,FOS,FOSB,JUN,SPP1	34 (18)
Growth hormone	group	Inhibited	-2.192	8e-06	EGR1,FOS,HES1,ID1,JUN,SPP1,TF	46 (20)
SNAI1	transcription regulator	Inhibited	-2.2	9.55e-06	CCN1,FOS,ID1,OLIG2,TF,VIM	41 (13)
LIF	cytokine	Inhibited	-2.204	5.15e-06	E2F1,EGR1,FOS,HES1,JUN,OLIG2,SPP1	35 (20)
TGFB3	growth factor	Inhibited	-2.213	2.68e-05	CCN1,FOS,FOSB,JUN,SOX9	40 (22)
CSF2	cytokine	Inhibited	-2.222	0.00497	EGR1,FOS,ID3,JUN,SPP1,TF	34 (23)
TGFBR2	kinase	Inhibited	-2.236	0.00127	EGR1,GADD45G,ID1,ID3,JUN,SPP1	49 (23)
OSM	cytokine	Inhibited	-2.345	9.62e-06	BAMBI,EGR1,FOS,FOSB,GADD45G,ID1,JUN,SFRP2,SPP1,VIM	51 (22)
BMP4	growth factor	Inhibited	-2.378	7.39e-05	CCN1,HES1,ID1,ID3,JUN,SOX9	45 (23)
SRC	kinase	Inhibited	-2.382	2.23e-06	FOS,ID1,JUN,NEUROD1,SPP1,VIM	40 (21)
EDN1	cytokine	Inhibited	-2.431	3.61e-05	CCN1,EGR1,FOS,FOSB,JUN,VIM	41 (21)
FGFR3	kinase	Inhibited	-2.449	4.99e-13	CLDN5,DLL1,FOS,HES1,NEUROG2,SOX9,SPP1,VIM	30 (7)
TGFB1	growth factor	Inhibited	-2.537	2.93e-07	BAMBI,CCN1,DKK3,E2F1,EGR1,FOS,FOSB,GADD45A,HES1,HMGN2,HSP90AA1,ID1,ID3,JUN,MEG3,MFAP4,MYBL1,SOX9,SPP1,VIM,ZFP36L2	54 (22)
IL1A	cytokine	Inhibited	-2.556	9.85e-06	CCN1,FOS,FOSB,JUN,SPP1,TRH,VIM	47 (21)
Tgf beta	group	Inhibited	-3.36	6.39e-13	ATOH7,BAMBI,CCN1,FOS,HES1,HES6,HSP90AA1,ID1,ID3,JUN,MAD2L1,NEUROD1,NEUROG2,OLIG2,SPP1,VIM	46 (22)
Histone h2a	group			0.00375	EGR1,JUN
CSDE1 HNRNPD PABP PAIP1 SYNCRIP	complex			0.00294	FOS
dopamine D1 receptor	group			0.00587	FOSB
TEAD	group			0.0319	CCN1
collagenase	group			0.00399	EGR1,JUN
Cop9 Signalosome	complex			0.00587	JUN
Ggtase I	complex			0.00879	CCN1
Adenosine Receptor	group			0.0146	CLDN5
dopamine receptor	group			0.0261	FOS
NF-Y	complex			0.00182	E2F1,GADD45A,MYBL1
NRDE2	other			0.0261	CCN1
CHD8	enzyme			0.00141	NEUROD1,NEUROG2,TUBA1B
FAM172A	transcription regulator			0.0233	SOX9
EPHB1	kinase			3.95e-06	EGR1,FOS,JUN	31 (19)
ADRA1	group			8.47e-05	EGR1,FOS	34 (20)
CSF2RB	transmembrane receptor			0.00126	FOS,JUN	34 (22)
AMOT	other			0.00879	CCN1
ANTXR2	transmembrane receptor			0.0347	VIM
CHD7	enzyme			0.00476	PMAIP1,SOX9
Nucleosome core	complex			0.0319	HMGN2
MSGN1	transcription regulator			0.000302	DLL1,HES1
Agtr1b	G-protein coupled receptor			0.0261	FOS
SOX2-OT	other			0.0347	VIM
MEG3	other			0.000757	JUN,VIM
Mir218	microRNA			0.000302	SFRP2,SPP1
Mmp	group			0.0375	CLDN5
CDK4/6	group			0.0191	E2F1,TUBA1B
BMP	group			0.00285	ID1,SPP1	7 (4)
MEF2	group			0.00424	DLL4,JUN	10 (3)
Pdgfr	group			0.00065	EGR1,VIM	22 (7)
JAK	group			0.00711	HES6,VIM
G protein alpha i	group			0.0206	CCN1,FOS
Neurotrophin	group			0.0204	FOS
SHP	group			0.0117	EGR1
Foxo	group			0.00113	GADD45A,PMAIP1
Nos	group			0.000995	EGR1,FOS	42 (17)
CaMKII	complex			0.00189	FOS,SOX9	27 (11)
Gsk3	group			0.000101	FOS,FOSB,JUN,SPP1	39 (21)
Ras homolog	group			0.00172	EGR1,FOS	39 (23)
RNA polymerase II	complex			0.000201	FOS,GADD45A,ID1,JUN,MAD2L1,SPP1	42 (11)
Calcineurin A	group			0.00449	FOS,JUN	17 (10)
Rb	group			0.00189	E2F1,MAD2L1,PTTG1	35 (10)
Rap1	group			0.0319	FOS
Dynamin	group			0.0175	FOS
FGFR	group			0.00141	FOS,SPP1	30 (20)
nicotinic acetylcholine receptor	complex			7.56e-05	FOS,ID1,JUN	41 (24)
Pde	group			0.0261	FOS
Calcineurin protein(s)	complex			0.00131	EGR1,FOS,SPP1	40 (18)
Histone h3	group			2.21e-06	E2F1,EGR1,FOS,HES1,ID1,JUN,MAD2L1,NEUROD1,PMAIP1,SPP1	49 (18)
SERCA	group			0.000127	EGR1,JUN	25 (12)
Ck2	complex			0.0261	FOS
ROCK	group			0.000542	FOS,SOX9,SPP1	35 (23)
Fgf	group			0.00424	FOS,JUN	33 (20)
Rac	group			0.0404	FOS
MSK1/2	group			0.00587	FOS
L-type Calcium Channel	complex			0.000302	EGR1,FOS	37 (24)
PLA2	group			0.00587	FOS
ETS	group			0.00207	EGR1,FOS
growth factor receptor	group			0.00294	FOS
Sod	group			0.0488	PMAIP1
ZFAS1	other			0.0375	VIM
PDGF-AA	complex			0.00264	FOS,VIM	28 (12)
Stat1-Stat3	complex			0.00879	FOS
Stat dimer	complex			0.0146	FOS
G protein beta gamma	complex			0.00879	CCN1
Integrin	complex			0.00113	FOS,JUN	27 (19)
Smad1/5/8-Smad4	complex			0.0233	ID1
AMPK	complex			0.00547	EGR1,PMAIP1,VIM	43 (24)
JUN/JUNB/JUND	group			7.56e-05	CCN1,FOS,JUN	10 (3)
Esr1-Estrogen-Sp1	complex			0.00879	FOS
Rxr	group			0.0444	GADD45A,SPP1
Nuclear factor 1	group			0.00375	FABP7,ID1
NPS	other			0.00587	FOS
Bvht	other			0.00141	DLL4,LIMCH1,VIM
TMEM231	other			0.0117	OLIG2
PRKAA	group			0.0122	PMAIP1,VIM
VitaminD3-VDR-RXR	complex			0.00811	GADD45A,SPP1
Nfat (family)	group			0.0383	CCN1,DKK3
TFIIA	complex			0.0319	FOS
PRC2	complex			0.00845	OLIG2,WIF1
Ptprd	phosphatase			0.0404	GADD45G
NR2F1-AS1	other			0.0175	VIM
NORAD	other			0.000239	CCN1,ID3,JUN
G-Actin	group			0.00294	JUN
thyroid hormone receptor	group			0.00285	FOS,PTTG1
LINC00842	other			0.0175	VIM
Rbx1	enzyme			0.00587	PTTG1
Smad	complex			0.00264	ID1,ID3
Igm	complex			0.00125	EGR1,ID3,ZFP36L1	36 (7)
Raf	group			1.85e-06	E2F1,EGR1,FOS,JUN,PMAIP1	42 (25)
IL12 (complex)	complex			0.0237	FOS,GADD45G,JUN
GPRC6A	G-protein coupled receptor			0.0404	EGR1
OTUD1	peptidase			0.0204	VIM
PKNOX2	transcription regulator			2.68e-05	EGR1,GADD45A,VIM
FOXQ1	transcription regulator			0.0175	VIM
INTS11	enzyme			2.55e-05	EGR1,FOSB
CDK19	kinase			0.000464	GADD45A,JUN,SAT1,ZFP36L1
trypsin	group			0.0375	FOS
NEUROD4	transcription regulator			0.0146	DLL1
NSD3	enzyme			0.0175	VIM
RNF187	enzyme			9.61e-05	ID1,JUN,PMAIP1,ZFP36L1
CKAP2L	other			0.000513	MAD2L1,PTTG1,TUBA1B
MTO1	enzyme			0.0204	VIM
MAGEA11	other			0.00879	E2F1
ALKBH1	enzyme			0.0488	SPP1
DRD3	G-protein coupled receptor			0.0146	FOS
PADI4	enzyme			0.046	GADD45A
DPPA3	other			0.0175	NEUROD1
TRIM37	enzyme			0.00744	EGR1,VIM
PARP	group			0.029	VIM
NADPH oxidase	complex			0.00207	FOS,JUN	34 (25)
Beta Arrestin	group			0.0175	FOS
PRAG1	kinase			0.00879	HES1
NPSR1	G-protein coupled receptor			0.0117	GADD45A
PRCP	peptidase			0.0204	TRH
BLVRA	enzyme			0.0261	JUN
KDM4D	enzyme			0.0375	SOX9
FICD	enzyme			0.0146	HSP90AA1
HTR7	G-protein coupled receptor			0.0261	FOS
FMOD	other			0.00587	HES1
Snhg6	other			0.0146	E2F1
FOXD2-AS1	other			0.0375	HES1
KDM8	enzyme			0.00131	ID1,IDH2,SOX9
SLC16A10	transporter			0.00294	TRH
MRPS18B	other			0.0204	VIM
CLEC14A	other			0.029	EGR1
RHBDD1	peptidase			0.0117	VIM
HJURP	other			0.029	VIM
LINC01139	other			0.029	EGR1
DACT1	other			0.0146	JUN
SENP7	peptidase			0.0261	VIM
MSI2	other			3.12e-05	CCN1,CLDN5,VIM
ZMIZ1	transcription regulator			0.0175	HES1
PRMT7	enzyme			0.0204	PMAIP1
GSX2	transcription regulator			0.0375	NEUROG2
SAV1	other			0.00225	SPP1,VIM
MELK	kinase			0.0347	VIM
FOXN4	transcription regulator			8.47e-05	DLL4,NEUROD1
Mir100hg	other			0.00879	VIM
DMRT3	transcription regulator			0.00294	NEUROG2
FOXL2	transcription regulator			0.0265	FOS,SOX9
ETHE1	enzyme			0.0146	PMAIP1
LIN28A	other			0.00989	CCN1,VIM	32 (6)
METTL3	enzyme			0.00534	JUN,MYBL1,VIM
ST6GALNAC1	enzyme			0.0204	VIM
CCDC3	other			0.0204	SOX9
RDH10	enzyme			0.0204	SFRP2
WDR73	other			0.0233	JUN
MTDH	transcription regulator			0.0103	SPP1,VIM
FA2H	enzyme			0.000302	CCN1,VIM
WWTR1	transcription regulator			0.00882	CCN1,HES1,SPP1	14 (4)
FBXO25	enzyme			8.51e-06	EGR1,FOS	15 (5)
ZNF652	other			0.0261	VIM
UCN2	other			0.0488	FOS
APOL1	transporter			0.0432	HES1
KMT2E	enzyme			0.0175	E2F1
DLX6-AS1	other			0.0175	HES1
TRIM29	transcription regulator			0.029	PMAIP1
MYEOV	other			0.00294	HES1
Fcer1	complex			0.0148	FOS,JUN
SRF-ELK1	complex			0.00294	FOS
Gpcr	group			8.47e-05	FOS,JUN	31 (22)
CENPU	other			0.00879	E2F1
BCAS2	other			0.0204	PMAIP1
HOXA-AS3	other			0.0117	VIM
SNHG11	other			0.0404	VIM
GPR17	G-protein coupled receptor			0.0233	FOS
ELOVL2	enzyme			0.029	EGR1
NSRP1	other			0.0146	VIM
FGF21	growth factor			0.00164	EGR1,FOS,VIM	35 (15)
Meg3	other			0.029	HES1
PIP5K1A	kinase			0.0347	WIF1
AMOTL2	other			0.0117	CCN1
GLIPR2	other			0.0117	VIM
KLF17	transcription regulator			0.000995	ID1,VIM
CLEC1B	transmembrane receptor			0.0347	SPP1
ZMPSTE24	peptidase			0.000383	GADD45A,GADD45G,RGS16	11 (3)
RBM15	other			0.00587	HES1
SNHG7	other			0.0261	VIM
BCAR4	other			0.0204	VIM
TUSC3	transporter			0.0117	VIM
BMPR1A	kinase			1.02e-05	ID1,ID3,OLIG2,SOX9	43 (22)
MGAT1	enzyme			0.0319	VIM
GKN1	growth factor			0.00294	SOX9
MIEF2	other			0.0319	VIM
FAT1	other			0.00264	JUN,VIM	29 (7)
LIN28B	other			0.000891	E2F1,SOX9,VIM	26 (7)
ACOT12	enzyme			0.00879	VIM
SLC6A12	transporter			0.0117	NEUROD1
PRKAG3	kinase			0.0129	EGR1,GADD45G,ID1
PHF8	enzyme			0.000377	E2F1,ID1
CHD5	enzyme			0.0175	VIM
PARP14	enzyme			0.0319	ID3
SPRED2	cytokine			0.00879	VIM
RUBCN	other			0.0375	SOX9
MYOC	other			0.0277	PLP1,SPP1
LINC00887	other			0.0146	VIM
PRR7	other			0.00879	JUN
DLK2	other			0.00879	HES1
LINC00472	other			0.0204	SPP1
YOD1	enzyme			0.0319	CCN1
TMPRSS6	peptidase			0.000995	ID1,VIM
IGF2	growth factor			1.25e-05	EGR1,FABP7,GADD45A,RGS16,SAT1,SPP1	41 (9)
KDM2B	enzyme			0.00559	FOS,SFRP2
WWC1	transcription regulator			0.0347	VIM
MEMO1	other			0.000302	FOS,JUN	38 (7)
PYCR1	enzyme			0.0146	VIM
DKK4	other			0.0261	JUN
ATE1	enzyme			0.0204	JUN
Fascin	group			0.00879	CCN1
TMTC3	enzyme			0.0204	VIM
LINC01018	other			0.0204	VIM
SMOC2	other			0.0404	VIM
Ftx	other			0.0146	JUN
C1QL1	other			0.00879	FOS
ZNF512B	transcription regulator			0.0204	E2F1
ZMIZ2	transcription regulator			0.0146	JUN
Histone h4	group			5.55e-06	E2F1,FOS,HES1,MAD2L1,PMAIP1,SPP1	30 (7)
E2F8	transcription regulator			0.0375	E2F1
ENKUR	other			0.00587	JUN
RRP1B	transcription regulator			0.0043	GADD45A,HSP90AA1,SPP1
NBR2	other			0.0117	VIM
IGF1R	transmembrane receptor			0.0145	EGR1,FOS,SPP1,ZFP36L2
DPY30	other			3.95e-06	E2F1,ID1,ID3
TEX11	other			0.0117	FOS
ZFP91	transcription regulator			0.046	MAD2L1
Crnde	other			0.0375	VIM
B9D1	other			0.0117	OLIG2
potassium channel	group			2.55e-05	FOS,JUN	16 (6)
endothelin receptor	group			0.0117	FOS
DRD1/5	group			0.0146	FOS
sGC	complex			8.47e-05	EGR1,FOS	39 (12)
Shc	group			0.029	FOS
STAT1/3 dimer	complex			0.00294	FOS
SRC (family)	group			0.000485	EGR1,ID1,NEUROD1	23 (7)
TCF/LEF	group			0.00207	JUN,VIM
PLCL2	enzyme			0.0347	ID1
Ribosomal Subunit 80S	complex			0.00879	EGR1
USP24	peptidase			0.0117	PTTG1
NAA30	enzyme			0.00879	PMAIP1
RABL6	other			0.000975	MAD2L1,PBK,PMAIP1
USP26	peptidase			0.0175	CCN1
CHIT1	enzyme			0.0233	VIM
SPDEF	transcription regulator			0.0206	DKK3,VIM
CCDC12	other			0.0175	VIM
GFPT2	enzyme			0.00587	VIM
VGLL3	other			0.00156	SOX9,SPP1
ZDHHC2	enzyme			0.0175	VIM
receptor protein tyrosine kinase	group			0.0117	SPP1
KLHL2	other			0.00879	JUN
BATF2	transcription regulator			8.51e-06	CCN1,JUN
MKX	transcription regulator			0.0261	SOX9
TTYH1	ion channel			0.0146	HES1
CTDSP1	phosphatase			0.000302	E2F1,VIM
SNHG3	other			0.0146	E2F1
BMPR2	kinase			0.0122	ID1,SPP1
AMOTL1	other			0.00879	CCN1
TUT1	enzyme			0.0175	WIF1
NSD1	transcription regulator			0.0488	ZFP36L1
SORCS3	transporter			0.0204	VIM
PNO1	other			0.00264	DLL1,HES1
ADAP1	other			0.00065	FOS,JUN
FGF14	growth factor			0.00294	FOS
HJV	transmembrane receptor			0.0233	ID1
SOX30	transcription regulator			0.0157	PMAIP1,SOX9
GNPTAB	enzyme			0.0117	SOX9
Fcor	enzyme			0.0319	GADD45A
TMEM165	other			0.00065	ID1,SOX9
PHF10	other			0.0233	E2F1
CTDSPL2	phosphatase			0.00587	ID1
GAS2L3	other			0.046	SAT1
DGCR5	other			0.0319	VIM
ZDHHC7	enzyme			0.0488	TF
TRPM3	ion channel			2.55e-05	EGR1,FOS
RBPJL	transcription regulator			0.029	HES1
RAB23	enzyme			0.0146	SOX9
KDM4B	enzyme			0.00225	IDH2,VIM
RADIL	other			0.00879	VIM
PRR11	other			0.0375	VIM
HYAL1	enzyme			0.0103	SOX9,SPP1
SLC47A1	transporter			0.029	VIM
LRRC32	other			0.029	VIM
PPM1E	phosphatase			0.00587	VIM
ZNRF3	enzyme			0.0175	SOX9
Sox2ot	other			0.00126	FABP7,VIM
DUOXA1	other			2.88e-06	NEUROD1,NEUROG2,VIM
PTPN23	phosphatase			0.00879	VIM
DEPTOR	other			0.0347	VIM
WDR4	enzyme			0.029	VIM
FNDC5	other			0.046	SPP1
NSD2	enzyme			0.000206	FOS,GADD45A,JUN	25 (7)
ZNF382	transcription regulator			0.0233	ID1
MRGPRX1	G-protein coupled receptor			0.00587	EGR1
FANK1	transcription regulator			0.00294	JUN
SBDS	other			0.000133	EGR1,FOS,ID1,SPP1	17 (4)
SNHG20	other			0.0319	VIM
DANCR	other			0.0432	VIM
LTBP4	growth factor			0.0233	ID1
CYSLTR2	G-protein coupled receptor			0.0319	EGR1
HERC3	enzyme			0.0233	VIM
PCIF1	enzyme			0.00294	FOS
Hedgehog	group			1.43e-05	HES1,NEUROD1,SOX9,SPP1
Sapk	group			5.09e-05	FOS,GADD45A	13 (4)
IL-2R	complex			0.0233	FOS
SMAD1/5	group			0.000302	ID1,ID3
FERD3L	transcription regulator			0.00294	HES1
MAP3K21	kinase			0.0233	VIM
CIP2A	other			0.0166	GADD45A,SAT1
FITM2	enzyme			0.0488	NEUROD1
RPE65	enzyme			0.0146	FOS
ROR1	kinase			0.00777	CCN1,VIM
SYT11	transporter			0.029	VIM
sphingomyelinase	group			0.0204	JUN
Gcn5l	group			0.0319	E2F1
gelatinase	group			0.00879	CLDN5
Endothelin	group			0.00126	FOS,JUN	32 (19)
Tas2r103	G-protein coupled receptor			0.00294	TRH
MEN1	transcription regulator			0.0131	FOS,VIM
WDR5	transcription regulator			6.03e-05	SFRP2,SPP1,VIM
EIF2AK3	kinase			0.0102	EGR1,GADD45A,JUN
MAPK8IP3	other			0.000995	JUN,TF
EIF2B5	translation regulator			0.00375	TF,VIM
PDLIM1	transcription regulator			0.0117	VIM
IDH2	enzyme			0.000458	EGR1,JUN,VIM
OMG	G-protein coupled receptor			0.00587	FOS
BCKDK	kinase			0.000302	OLIG2,PLP1
ABCB4	transporter			0.0103	SPP1,VIM
ATP1A2	transporter			0.00879	FOS
PRKDC	kinase			0.00476	EGR1,PTTG1
mediator	complex			0.00294	FOS
INTERLEUKIN	group			0.00587	FOS
HLA-DQ	complex			0.0204	FOS
7S NGF	complex			0.0146	FOS
Ppp2c	group			0.0375	ID1
Gap	group			0.00879	FOS
ZNF467	transcription regulator			0.0117	FOS
Retnla	other			0.046	HES1
ICAM1	transmembrane receptor			0.000635	FOS,HES1,VIM	34 (12)
ATP7B	transporter			0.00618	MAD2L1,PTTG1
JDP2	transcription regulator			0.0204	JUN
MAPK8IP1	other			0.00189	FOS,JUN	31 (17)
SKP2	other			0.000206	E2F1,PTMA,VIM
GRP	growth factor			8.42e-05	FOS,FOSB,JUN	34 (19)
PPP1R1B	phosphatase			0.0488	FOS
TRH	other			0.000206	FOS,JUN,TRH	30 (20)
CCND1	transcription regulator			6.11e-05	E2F1,ID1,ID3,MYBL1,PCLAF,SPP1,TUBA1B
XDH	enzyme			0.000176	ID3,SPP1,VIM
MAP2K4	kinase			0.000669	FOS,GADD45A,JUN	31 (17)
NFATC3	transcription regulator			0.00106	FOS,FOSB,JUN
VWF	other			0.0261	HES1
GFRA1	transmembrane receptor			0.0117	JUN
PMF1/PMF1-BGLAP	transcription regulator			0.00294	SAT1
TEAD4	transcription regulator			0.000422	CCN1,JUN,LIMCH1,VIM
DLL4	other			0.00916	DLL4,HES1	4 (2)
ASCL2	transcription regulator			0.0204	EGR1
MEIS2	transcription regulator			0.00285	ID1,ID3
MAX	transcription regulator			0.000178	E2F1,GADD45A,ID1,PTMA
IRS1	enzyme			0.000933	EGR1,FOS,SFRP2,SPP1	44 (18)
ZNF202	transcription regulator			0.00156	INSM1,PLP1
ARHGEF17	other			0.00294	FOS
AREG	growth factor			0.00246	EGR1,FOS,JUN	34 (19)
RAB11FIP3	other			5.09e-05	FOS,JUN	25 (7)
FANCG	other			0.00879	HES1
Atf	group			0.0146	JUN
ARHGEF1	other			0.0233	FOS
NCOR2	transcription regulator			0.000813	FOS,JUN,TRH	35 (12)
FEV	transcription regulator			0.00216	FOS,SOX9,VIM
ENPP1	enzyme			0.0204	SPP1
MCM10	other			0.0146	VIM
PRMT5	enzyme			0.0135	SOX9,WIF1
SCAP	other			0.0301	HES6,ID1
PGF	growth factor			0.00648	EGR1,FOSB	23 (14)
KL	enzyme			0.0148	EGR1,VIM
PRRX1	transcription regulator			0.00244	FOS,SOX9
LYL1	transcription regulator			4.71e-05	EGR1,ID1,ID3
FANCL	enzyme			0.00294	HES1
Betacatenin/TCF	complex			0.0432	JUN
Cdk	group			0.00424	GADD45A,GADD45G
ALOX12	enzyme			0.0347	JUN
NELFB	other			0.00172	GADD45A,MAD2L1
PRKG2	kinase			8.44e-07	FOS,PLP1,SOX9
PYY	other			0.0432	NEUROD1
PPM1D	phosphatase			0.029	PMAIP1
FGFR4	kinase			0.0221	FOS,VIM
MAPK8IP2	other			0.00587	FOS
HTATIP2	transcription regulator			0.00207	FOS,SPP1	43 (9)
HDAC5	transcription regulator			0.00223	HES1,JUN,MEG3
CARTPT	other			0.00046	FOS,TRH	26 (7)
VIP	other			0.00409	FOS,TRH,VIM	47 (20)
CCK	other			0.00207	EGR1,FOS	32 (21)
APOA4	transporter			0.0404	FOS
TFB1M	transcription regulator			0.00294	E2F1
FANCF	other			0.00587	HES1
C1QA	other			0.00424	EGR1,VIM
EP400	other			0.00679	E2F1,H2AZ1
LCK	kinase			0.00131	EGR1,FOS,JUN	33 (20)
HLX	transcription regulator			0.000125	EGR1,HES1,JUN
SMAD2	transcription regulator			0.00534	HES1,NEUROD1,VIM
GAS6	growth factor			0.00328	CCN1,OLIG2
PDLIM7	other			0.0233	SPP1
FANCA	other			0.00065	EGR1,HES1	16 (7)
PDE6B	enzyme			0.0204	FOS
ZFHX3	transcription regulator			2.67e-07	ID3,NEUROD1,PTTG1,RGS16,TRH,TUBA1B
DEF6	other			0.00207	FOS,VIM	24 (7)
GADD45G	other			0.0347	FOS
TRPV2	ion channel			0.0204	E2F1
SETD2	enzyme			0.00777	CCN1,JUN
NOTCH4	transcription regulator			0.00449	DLL4,HES1
CSDE1	enzyme			0.00126	FABP7,VIM
RUNX3	transcription regulator			0.00695	CCN1,SPP1,VIM	5 (2)
EPAS1	transcription regulator			0.0405	CCN1,FOS,SOX9
LATS1	kinase			0.00952	SOX9,SPP1
GIP	other			0.0135	FOS,SPP1
WDR48	other			0.0175	VIM
Til1	other			0.00879	SPP1
NTF4	growth factor			0.000995	FOS,SPP1	20 (10)
REL	transcription regulator			0.0059	FOS,JUN,PMAIP1,VIM	44 (22)
PAK4	kinase			0.0375	VIM
RAP1GAP	other			0.0204	FOS
S100B	other			0.00141	FOS,JUN	35 (23)
AGTRAP	G-protein coupled receptor			0.046	FOS
HOXA2	transcription regulator			0.0261	SOX9
FGF23	growth factor			0.0404	EGR1
TNFSF12	cytokine			0.0396	DLL1,HES6
ELL	transcription regulator			0.00879	FOS
PLCG1	enzyme			0.00156	EGR1,FOS	30 (21)
GNA14	enzyme			0.0191	GADD45A,ZFP36L1
REV1	enzyme			0.0261	PMAIP1
ZNF281	transcription regulator			0.00845	GADD45A,GADD45G
ITGA5	transmembrane receptor			0.00916	FOS,JUN	30 (18)
CD244	transmembrane receptor			0.000377	EGR1,FOS	33 (19)
MST1	growth factor			0.00264	FOS,SPP1	33 (14)
RBL1	transcription regulator			0.00152	E2F1,FOS,HES1	29 (11)
PPARG	ligand-dependent nuclear receptor			0.0185	HES1,JUN,SAT1,SPP1,VIM
KCNN4	ion channel			0.0375	FOS
NAMPT	cytokine			0.0383	ID1,JUN
IL11	cytokine			0.00152	FOS,JUN,SPP1	39 (16)
EHD1	other			0.0375	VIM
IRF8	transcription regulator			0.0203	EGR1,FOS,ID3
SHC1	other			0.00131	DAPL1,EGR1,FOS	25 (10)
JAK1	kinase			0.00147	FOS,ID1,TF	26 (7)
SMAD1	transcription regulator			0.00036	ID1,SOX9,SPP1	7 (3)
PXDN	enzyme			0.0488	JUN
CBS/LOC102724560	enzyme			0.00207	CLDN5,VIM
BCL11A	transcription regulator			0.0347	GADD45A
EGR3	transcription regulator			0.0121	ID3,JUN,SOX9
DLL1	enzyme			0.000176	DLL1,DLL4,HES1	21 (7)
FGF4	growth factor			0.00244	FOS,PTTG1
OPRK1	G-protein coupled receptor			0.0175	FOS
POLR2A	enzyme			0.00102	FOS,NEUROD1,VIM
SCN1A	ion channel			0.00587	VIM
ZBTB16	transcription regulator			0.0274	FABP7,ID3,SPP1
FAF1	other			0.0204	VIM
POU3F2	transcription regulator			0.00126	FABP7,NEUROD1
TBX6	transcription regulator			0.00879	DLL1
KIFAP3	other			0.00294	FOS
DNMT1	enzyme			0.0403	SFRP2,VIM
ISLR	other			0.00559	CCN1,FOS
GRK3	kinase			0.000177	CCN1,SOX9
FABP3	transporter			0.00285	EGR1,FOS	27 (12)
KLF9	transcription regulator			0.00141	NEUROD1,PMAIP1
CST3	other			0.0347	FOS
LRP6	transmembrane receptor			2.76e-05	FOS,SPP1,TTYH1,VIM	42 (19)
NCAPD3	other			0.00587	E2F1
IL2RA	transmembrane receptor			0.00225	FOS,JUN	30 (14)
TFDP1	transcription regulator			0.00503	E2F1,PTTG1	11 (4)
HOXA13	transcription regulator			0.0103	DLL1,SOX9
AGR2	other			0.000177	EGR1,FOS
PDGFB	growth factor			0.00116	EGR1,FOS,SPP1	39 (21)
ITCH	enzyme			0.00618	CCN1,FOS	19 (7)
RBBP4	enzyme			0.0347	E2F1
CDK9	kinase			0.0127	FOS,VIM
TAF4	transcription regulator			0.00286	PBK,SFRP2,SPP1
ALDH1A2	enzyme			0.00399	CCN1,SPP1
ETV4	transcription regulator			0.00559	SPP1,VIM
CAT	enzyme			0.0127	PMAIP1,VIM
HMOX1	enzyme			0.00667	FOS,ID1,ID3	25 (12)
LOXL2	enzyme			0.000757	SOX9,VIM
CLDN1	other			0.0175	VIM
IL1R1	transmembrane receptor			0.0135	EGR1,FOS
SPZ1	transcription regulator			0.00172	E2F1,VIM
IL24	cytokine			0.00952	GADD45A,GADD45G
PPY	other			0.00294	FOS
BMP15	growth factor			0.00207	ID1,ID3	9 (7)
PITX3	transcription regulator			0.0261	NEUROG2
ACVR2A	kinase			0.0347	ID1
ITGB1	transmembrane receptor			0.0125	FOS,JUN,VIM
MSX2	transcription regulator			0.00679	SPP1,VIM
LATS2	kinase			3.15e-05	CCN1,E2F1,SOX9,SPP1	42 (11)
PROK2	other			0.0175	FOS
HINFP	transcription regulator			0.0261	H4C3
IDH1	enzyme			0.0148	EGR1,VIM
CDH2	other			0.00207	JUN,VIM	15 (5)
SFRP1	transmembrane receptor			0.000572	SOX9,TTYH1,VIM
PDGF (family)	group			0.000872	JUN,VIM	27 (6)
TSH	complex			0.0166	EGR1,FOS
CBR3-AS1	other			0.0204	VIM
CCAT1	other			0.0347	VIM
FGD5-AS1	other			0.0117	VIM
ADAM10	peptidase			6.46e-05	FABP7,FOS,GADD45G,PLP1,SOX9
DLX1	transcription regulator			0.0176	VIM,ZFP36L1
MYBL1	transcription regulator			0.00351	HSP90AA1,UBE2T
MYF6	transcription regulator			0.0403	DLL1,SPP1
ADAM17	peptidase			5.45e-05	GADD45G,HES1,SOX9,SPP1,TF	38 (14)
CTNND1	other			0.029	VIM
GPHA2	other			0.00294	FOS
CHEK1	kinase			0.00172	E2F1,MAD2L1	6 (2)
PLCD1	enzyme			0.0233	VIM
SPTBN1	other			0.0404	FOS
NEUROG2	transcription regulator			0.000191	DLL1,NEUROD1,SOX9
EDN3	other			0.00172	EGR1,FOS	29 (21)
NEK10	kinase			0.0175	GADD45A
KCNIP2	transporter			0.0233	FOSB
RUNX1	transcription regulator			0.00946	MAD2L1,PMAIP1,SOX9,SPP1	36 (12)
PRKG1	kinase			0.00399	FOS,ID1
HMGN1	transcription regulator			1.54e-06	FOS,FOSB,NEUROD1,SOX9
TARDBP	transcription regulator			0.00572	MIAT,PLP1,SFRP2
CD24	other			0.0403	FOS,JUN
MAPT	other			0.00948	FOS,HSP90AA1,JUN,QDPR,TUBA1B,VIM	39 (12)
REST	transcription regulator			0.0132	MAD2L1,NEUROD1,SCG3
NMB	other			5.09e-05	FOS,JUN	35 (16)
H1-2	other			0.000995	GADD45A,PMAIP1
CBX2	transcription regulator			0.0404	SOX9
IRF4	transcription regulator			0.0217	PTMA,SPP1,ZFP36L1
MMP9	peptidase			0.000409	CLDN5,FOS,GADD45A,VIM
HMGCR	enzyme			0.0204	CCN1
NUMB	other			6.76e-05	DLL4,HES1,VIM	28 (9)
PDGFA	growth factor			0.029	EGR1
ADAMTS7	peptidase			0.00294	SOX9
RAX	transcription regulator			0.046	HES1
NFYB	transcription regulator			0.00836	GADD45A,PCLAF,PTTG1,VIM
ARID1B	transcription regulator			0.0117	FOS
INHBA	growth factor			0.0261	BAMBI,RGS16,VIM
MC4R	G-protein coupled receptor			0.00306	FOS,TRH	19 (7)
MBIP	other			0.029	JUN
NPY	other			0.0157	FOS,TRH
PTK2	kinase			0.000975	CCN1,FOS,SPP1	50 (20)
SOX8	transcription regulator			0.0375	PLP1
FOXP3	transcription regulator			0.0178	EGR1,FOS,JUN
CDK5R1	kinase			0.00141	FOS,PMAIP1
CCR3	G-protein coupled receptor			0.0347	SPP1
NEUROD1	transcription regulator			0.0135	INSM1,NEUROD1
RLIM	enzyme			0.0319	VIM
AGRP	other			0.000377	FOS,TRH
ZFPM2	transcription regulator			0.046	SOX9
MAP3K3	kinase			0.00264	FOS,JUN	35 (18)
DAB2IP	other			0.00046	EGR1,VIM
NGFR	transmembrane receptor			0.00588	FOS,JUN	22 (17)
GFI1	transcription regulator			0.0102	GADD45G,JUN,NEUROD1
TFRC	transporter			0.00865	FOS,GADD45A,JUN	39 (7)
PIAS2	transcription regulator			0.0347	FOS
DAB2	other			0.0204	FOS
LIPC	enzyme			0.0319	VIM
ELP3	enzyme			0.0233	SOX9
TEAD3	transcription regulator			0.0103	CCN1,LIMCH1
CHRM3	G-protein coupled receptor			5.25e-06	CCN1,EGR1,FOS	37 (18)
SERPINE1	other			0.00294	EGR1,FOS,VIM	48 (25)
TERT	enzyme			0.0214	NEUROD1,SPP1,VIM
NTF3	growth factor			0.00449	FOS,JUN	29 (21)
CAMK4	kinase			0.00036	FOS,FOSB,JUN	45 (22)
DSCAM	other			0.00277	GADD45G,ID3,VIM
TEC	kinase			0.029	FOS
ENO1	enzyme			0.029	VIM
SLC7A11-AS1	other			0.0175	JUN
IGF2BP1	translation regulator			0.000176	E2F1,GADD45A,SOX9
PNN	other			0.046	JUN
APBB1	transcription regulator			0.0432	HES1
MIR320	group			0.029	E2F1
MDM4	transcription regulator			0.00375	E2F1,VIM
mir-338	microRNA			0.029	VIM
miR-515-5p (and other miRNAs w/seed UCUCCAA)	mature microRNA			0.0129	CCN1,HMGN2,ID3
miR-520g-3p (and other miRNAs w/seed CAAAGUG)	mature microRNA			0.00777	PBK,PMAIP1
miR-1283 (miRNAs w/seed CUACAAA)	mature microRNA			0.0176	ATOH7,FABP7
miR-224-3p (and other miRNAs w/seed AAAUGGU)	mature microRNA			0.0166	CCN1,NEUROD1
mir-190	microRNA			0.0233	VIM
mir-148	microRNA			0.00679	EGR1,VIM
miR-1b-5p (miRNAs w/seed ACAUACU)	mature microRNA			0.0181	NEUROG2,VSTM2B
mir-1	microRNA			0.0051	SH3BGRL3,SOX9,ZFP36L1
miR-210-5p (and other miRNAs w/seed GCCACUG)	mature microRNA			0.0195	CLDN5,H4C3,SAT1
mir-506	microRNA			0.029	VIM
mir-25	microRNA			0.00648	E2F1,GADD45A
miR-470-3p (miRNAs w/seed ACCAGUA)	mature microRNA			0.037	NEUROG2,TTC14
miR-29b-1-5p (miRNAs w/seed CUGGUUU)	mature microRNA			0.0494	NEUROD1,PCLAF
mir-29	microRNA			0.00339	SFRP2,VIM,ZFP36L1
miR-17-2-3p (and other miRNAs w/seed CUGCACU)	mature microRNA			0.0437	PTTG1,TTC14
mir-17	microRNA			0.0325	E2F1,VIM
miR-424-3p (miRNAs w/seed AAAACGU)	mature microRNA			0.00777	FOS,WIF1
mir-27	microRNA			0.00141	CLDN5,DLL4,E2F1
miR-196a-1-3p (miRNAs w/seed AACGACA)	mature microRNA			0.00989	NEUROD1,SOX9
mir-196	microRNA			0.046	FOS
miR-4761-5p (miRNAs w/seed CAAGGUG)	mature microRNA			0.0238	HMGN2,VXN
miR-34a-3p (miRNAs w/seed AAUCAGC)	mature microRNA			0.0181	FOS,JUN
mir-34	microRNA			0.0376	DLL1,E2F1
miR-3081-3p (miRNAs w/seed UGCGCUC)	mature microRNA			0.0216	CCN1,VIM
mir-192	microRNA			0.00113	JUN,MAD2L1
miR-548v (miRNAs w/seed GCUACAG)	mature microRNA			0.00585	HES4,MYBL1,WIF1
mir-28	microRNA			0.0175	MAD2L1
miR-183-5p (miRNAs w/seed AUGGCAC)	mature microRNA			0.0436	IDH2,PCLAF,QDPR
mir-183	microRNA			0.000572	EGR1,IDH2,VIM
miR-141-3p (and other miRNAs w/seed AACACUG)	mature microRNA			0.0374	GADD45A,PMAIP1,VIM
miR-550a-3p (and other miRNAs w/seed GUCUUAC)	mature microRNA			0.00585	ATOH7,MAD2L1,PCLAF
mir-541	microRNA			0.029	VIM
miR-3671 (miRNAs w/seed UCAAAUA)	mature microRNA			0.0144	SAT1,TTC14
MIR4269	microRNA			0.0146	CCN1
miR-3616-5p (and other miRNAs w/seed UGAAGUG)	mature microRNA			0.0376	DKK3,PRSS35
miR-1264 (and other miRNAs w/seed AAGUCUU)	mature microRNA			0.037	MGARP,VSTM2B
miR-101-3p (and other miRNAs w/seed ACAGUAC)	mature microRNA			0.0352	FOS,NEUROD1,SOX9
mir-101	microRNA			0.00225	CLDN5,IDH2
miR-343 (and other miRNAs w/seed CUCCCUU)	mature microRNA			0.0444	CCN1,EGR1,RGS16
let-7	microRNA			0.0345	MAD2L1,SOX9,VIM
miR-3131 (and other miRNAs w/seed CGAGGAC)	mature microRNA			0.026	DLL1,SHD
miR-466b-3p (and other miRNAs w/seed UACAUAC)	mature microRNA			0.0176	NEUROG2,SPP1
mir-122	microRNA			0.0325	SH3BGRL3,VIM
miR-3910 (miRNAs w/seed AAGGCAU)	mature microRNA			0.00612	FABP7,MYBL1,ZFP36L2
mir-31	microRNA			0.00375	BAMBI,SPP1
miR-1226-5p (and other miRNAs w/seed UGAGGGC)	mature microRNA			0.0428	GADD45A,PRSS35,SFRP2
mir-194	microRNA			0.046	E2F1
miR-3648 (miRNAs w/seed GCCGCGG)	mature microRNA			0.0223	CLDN5,FAM131C,JUN
miR-876-5p (and other miRNAs w/seed GGAUUUC)	mature microRNA			0.00755	GADD45A,QDPR,VIM
miR-337-5p (miRNAs w/seed GGCGUCA)	mature microRNA			0.0283	PCLAF,PLP1
miR-191-5p (and other miRNAs w/seed AACGGAA)	mature microRNA			0.0319	EGR1,VXN
miR-2355-3p (miRNAs w/seed UUGUCCU)	mature microRNA			0.0102	PRSS35,RGS16,VXN
mir-8	microRNA			0.0217	PMAIP1,SOX9,VIM
miR-4275 (miRNAs w/seed CAAUUAC)	mature microRNA			0.00328	MAD2L1,PMAIP1
mir-612	microRNA			0.0146	VIM
miR-138-1-3p (miRNAs w/seed CUACUUC)	mature microRNA			0.0488	ATOH7
mir-138	microRNA			0.0117	VIM
mir-378	microRNA			0.046	VIM
mir-23	microRNA			0.00777	E2F1,SPP1	23 (3)
miR-186-5p (miRNAs w/seed AAAGAAU)	mature microRNA			0.0144	PTTG1,VIM
mir-186	microRNA			0.0146	PTTG1
mir-942	microRNA			0.0175	VIM
miR-450a-5p (and other miRNAs w/seed UUUGCGA)	mature microRNA			0.0389	SPP1,VIM
miR-7216-3p (miRNAs w/seed GGAAUUU)	mature microRNA			0.0139	DLL1,QDPR
miR-3192-5p (miRNAs w/seed CUGGGAG)	mature microRNA			0.0401	FOSB,HES6,TUBA1B
mir-182	microRNA			0.0243	GADD45G,VIM
miR-4327 (miRNAs w/seed GCUUGCA)	mature microRNA			0.0186	ATOH7,SOX9
mir-944	microRNA			0.00587	VIM
miR-4728-3p (miRNAs w/seed AUGCUGA)	mature microRNA			0.0363	HMGN2,PMAIP1
MIR4728	microRNA			0.00587	PMAIP1
miR-1952 (miRNAs w/seed CUCCACC)	mature microRNA			0.00865	ATOH7,HES6,TF
miR-3126-5p (and other miRNAs w/seed GAGGGAC)	mature microRNA			0.029	FAM131C,SH3BGRL3,VXN
miR-4264 (miRNAs w/seed CUCAGUC)	mature microRNA			0.0319	MGARP,VSTM2B
mir-149	microRNA			0.0146	E2F1
miR-3071-3p (miRNAs w/seed UCAUCAA)	mature microRNA			0.0313	JUN,SAT1
miR-4329 (miRNAs w/seed CUGAGAC)	mature microRNA			0.0162	PTMA,SH3BGRL3
miR-3668 (miRNAs w/seed AUGUAGA)	mature microRNA			0.0319	INSM1,PBK
miR-4307 (miRNAs w/seed AUGUUUU)	mature microRNA			0.0114	LIMCH1,SCG3
mir-3622	microRNA			0.000995	GADD45A,PMAIP1
miR-673-5p (and other miRNAs w/seed UCACAGC)	mature microRNA			0.0149	ATOH7,MGARP,OLIG2
miR-692 (and other miRNAs w/seed UCUCUUU)	mature microRNA			0.0287	FABP7,SPP1,TTC14
miR-4506 (miRNAs w/seed AAUGGGU)	mature microRNA			0.0472	SH3BGRL3,VXN
miR-5133 (miRNAs w/seed CUGGAGC)	mature microRNA			0.0232	CCN1,SHD
miR-2139 (miRNAs w/seed GCUGCGC)	mature microRNA			0.0383	CCN1,CLDN5
miR-4786-3p (miRNAs w/seed GAAGCCA)	mature microRNA			0.048	H2AZ1,SPP1
miR-4457 (miRNAs w/seed CACAAGG)	mature microRNA			0.0331	HMGB3,VXN
miR-2117 (miRNAs w/seed GUUCUCU)	mature microRNA			0.0494	PMAIP1,SPP1
MIR378I	microRNA			0.0146	VIM
miR-569 (miRNAs w/seed GUUAAUG)	mature microRNA			0.00503	FOS,TUBA1B
miR-219b-3p (miRNAs w/seed GAAUUGC)	mature microRNA			0.041	FABP7,NEUROD1
miR-587 (miRNAs w/seed UUCCAUA)	mature microRNA			0.0201	HMGN2,PMAIP1
miR-4432 (miRNAs w/seed AAGACUC)	mature microRNA			0.00679	H2AZ1,PMAIP1
mir-383	microRNA			0.0146	GADD45G
miR-10394-3p (and other miRNAs w/seed GGGCGCG)	mature microRNA			0.0376	HES4,OLIG2
miR-519a-2-5p (and other miRNAs w/seed CUCUACA)	mature microRNA			0.0118	HES1,SPP1
miR-659-3p (miRNAs w/seed UUGGUUC)	mature microRNA			0.0249	GADD45A,PTMA
miR-1950 (miRNAs w/seed CUGCAUC)	mature microRNA			0.0437	H2AZ1,PTTG1
miR-3475-3p (and other miRNAs w/seed CUGGAGG)	mature microRNA			0.037	FOSB,ID1,SH3BGRL3
miR-4668-3p (miRNAs w/seed AAAAUCC)	mature microRNA			0.029	H2AZ1
miR-7115-3p (miRNAs w/seed CUUGGUC)	mature microRNA			0.0494	JUN,RGS16
miR-7036a-3p (miRNAs w/seed CGUCCUC)	mature microRNA			0.0319	GADD45G,SOX9
miR-873b (miRNAs w/seed CAAGUUC)	mature microRNA			0.0186	CLDN5,JUN
miR-7086-3p (miRNAs w/seed CCGUUCU)	mature microRNA			0.0319	H4C3,PLP1
miR-6955-3p (miRNAs w/seed CACCUGU)	mature microRNA			0.0114	PTTG1,SHD
F2RL1	G-protein coupled receptor			0.0357	CCN1,FOS
KISS1	other			0.00264	EGR1,FOS	37 (22)
EED	transcription regulator			0.00711	OLIG2,WIF1	2 (2)
HGS	other			0.00189	FOS,JUN	30 (12)
MAPK15	kinase			0.00879	JUN
mir-150	microRNA			0.000316	CLDN5,DLL4,MIAT
BMI1	transcription regulator			0.0166	MEG3,VIM
EGFL7	other			0.0175	HES1
CD44	other			0.000779	GADD45A,JUN,SFRP2,SPP1,VIM	48 (19)
F3	transmembrane receptor			0.00111	CCN1,EGR1,FOS	29 (14)
SMARCA1	transcription regulator			0.0233	GADD45A
KAT6A	enzyme			0.0221	SOX9,TF
SOX18	transcription regulator			0.0233	DLL4
GHRHR	G-protein coupled receptor			0.0432	FOS
BLNK	other			0.046	JUN
CBFA2T2	transcription regulator			0.0117	HES1
HTR1A	G-protein coupled receptor			0.0319	VIM
POU3F3	transcription regulator			0.0233	FABP7
SPRY4-IT1	other			0.029	VIM
HPX	transporter			0.046	SOX9
LAMB1	other			0.0117	DLL4
DKK2	other			0.0261	SPP1
NUCB2	other			0.000127	FOS,TRH
GUSB	enzyme			0.0261	CCN1
STRN	other			0.0233	VIM
GAS7	other			0.0146	SPP1
GDF9	growth factor			0.00559	ID1,ID3	9 (8)
SS18	transcription regulator			0.00531	DLL1,HES4
MRAS	enzyme			0.0319	VIM
LATS	group			0.0233	CCN1
SLC1A1	transporter			0.0175	FOS
NOTCH3	transcription regulator			0.00152	FABP7,HES1,ID1
GJA1	transporter			0.00588	SPP1,VIM	29 (7)
CSF2RA	transmembrane receptor			0.00065	FOS,JUN	29 (13)
FYN	kinase			0.0088	FOS,PLP1
MACROH2A1	other			0.000101	EGR1,GADD45A,ID1,VXN
POLE2	enzyme			0.0204	VIM
IRAK4	kinase			3.86e-06	EGR1,FOS,FOSB,JUN,RGS16	46 (24)
CSK	kinase			0.046	FOS
MED16	transcription regulator			0.00065	CCN1,VIM
Irs3	other			0.0175	EGR1
PTGER2	G-protein coupled receptor			0.0043	EGR1,PBK,SPP1
SFRP4	transmembrane receptor			0.00351	SFRP2,VIM
POU4F1	transcription regulator			0.0423	NEUROD1,PMAIP1
ADAR	enzyme			0.0375	FOS
APAF1	other			0.0175	VIM
NPVF	other			0.00294	FOS
POMC	other			0.0033	FOS,JUN,TRH	48 (18)
NCK1	kinase			0.029	FOS
ARNT	transcription regulator			0.00149	BAMBI,HES6,SPP1,VIM	35 (6)
NPY1R	G-protein coupled receptor			0.0488	FOS
CYSLTR1	G-protein coupled receptor			0.0233	FOS
CALCR	G-protein coupled receptor			0.0146	FOS
PARP1	enzyme			0.000778	E2F1,FOS,HES1,JUN	46 (23)
MIR5590	microRNA			0.00587	VIM
RBM5-AS1	other			0.0432	JUN
HDAC3	transcription regulator			0.00419	FOS,SPP1,VIM	46 (14)
miR-5586-5p (miRNAs w/seed AUCCAGC)	mature microRNA			0.0451	FOS,HMGN2
miR-5626-3p (and other miRNAs w/seed AGCAGUU)	mature microRNA			0.0238	GADD45A,VIM
miR-5695 (miRNAs w/seed CUCCAAG)	mature microRNA			0.0283	HMGN2,ID3
miR-3184-3p (miRNAs w/seed AAGUCUC)	mature microRNA			0.000738	EGR1,HMGN2,MGARP
miR-5617-3p (miRNAs w/seed AGGCGGC)	mature microRNA			0.0487	PTTG1,SH3BGRL3
miR-5624-5p (miRNAs w/seed AUUGUAA)	mature microRNA			0.0135	FABP7,ID1
miR-3529-3p (miRNAs w/seed ACAACAA)	mature microRNA			0.0227	HMGN2,PCLAF
F10	peptidase			0.000757	CCN1,EGR1	22 (8)
ATN1	transcription regulator			0.00725	NEUROD1,RGS16,SPP1
ID3	transcription regulator			0.0209	GADD45G,ID3,NEUROD1
DRD1	G-protein coupled receptor			8.65e-06	EGR1,FOS,FOSB	40 (18)
TSC2	other			0.00159	E2F1,EGR1,FOS,METRN	35 (14)
ANXA2	other			0.00449	GADD45A,JUN	23 (11)
NUP107	other			0.0204	FOS
MCHR1	G-protein coupled receptor			0.00879	TRH
ANKH	transporter			5.09e-05	SOX9,SPP1	25 (6)
EEF1G	translation regulator			0.00294	VIM
TLE1	transcription regulator			0.000757	EGR1,FOS
NKX6-1	transcription regulator			0.046	E2F1
ZEB1	transcription regulator			0.00398	CCN1,TF,VIM
THBS2	other			0.0404	HES1
YBX1	transcription regulator			0.00755	FOS,ID1,PMAIP1	27 (7)
PLAUR	transmembrane receptor			0.000316	E2F1,JUN,VIM	47 (22)
STK3	kinase			0.0488	SPP1
BORCS8-MEF2B	transcription regulator			0.00294	JUN
TFCP2	transcription regulator			0.046	SPP1
HCRT	other			0.000377	EGR1,FOS	31 (10)
JUND	transcription regulator			0.0254	SAT1,SPP1
WIF1	other			0.0319	SFRP2
MAPK12	kinase			0.00189	FOS,JUN	41 (15)
NGEF	other			0.0265	LIMCH1,SOX9
HEIH	other			0.00328	FOS,JUN	20 (7)
TGFB2-AS1	other			0.0221	E2F1,FOS
ETV1	transcription regulator			0.000114	E2F1,SOX9,VIM
EPHX2	enzyme			3.6e-05	DLL1,DLL4,HES1
FOXO4	transcription regulator			0.0458	GADD45A,SOX9
INHA	growth factor			0.0389	CCN1,E2F1
BCL2L1	other			0.0157	NEUROD1,NEUROG2
SUMO1P3	other			0.0233	VIM
H2AX	transcription regulator			0.0088	GADD45A,SFRP2
EGR4	transcription regulator			0.000236	EGR1,MYBL1
LCN2	transporter			0.0325	SPP1,VIM
TIAM1	other			0.0146	JUN
UTS2	other			0.0146	FOS
CDR2	other			0.0146	TF
NCSTN	peptidase			0.00503	HES1,VIM
PLAU	peptidase			0.0191	CCN1,VIM
BNIP3L	other			0.0135	E2F1,GADD45A
ZEB2	transcription regulator			0.0191	E2F1,VIM
SPRY2	other			0.00419	FABP7,FOS,SPP1
ATM	kinase			6.75e-05	GADD45A,GADD45G,HSP90AA1,JUN	42 (11)
PLCB1	enzyme			0.0404	VIM
IRS2	enzyme			0.0139	EGR1,FOS
ALOX15	enzyme			0.00618	ID3,JUN	26 (10)
CD209	other			0.0432	CLDN5
Nisch	other			0.0175	FOS
HDAC9	transcription regulator			0.00306	DLL4,JUN	4 (3)
POLR1HASP	other			0.0117	HSP90AA1
SGO1-AS1	other			0.0233	VIM
DLEU2	other			0.0319	VIM
UBQLN1	other			0.0261	VIM
PENK	other			0.0146	FOS
CX3CL1	cytokine			0.00114	FABP7,NEUROD1,PLP1,SPP1
WWP2	enzyme			0.0488	VIM
DTX1	transcription regulator			0.00285	EGR1,SPP1	16 (7)
KLF2	transcription regulator			0.000233	DLL1,GADD45A,ID1,ID3,SOX9
RALGDS	other			0.00879	E2F1
GNAO1	enzyme			0.0204	FOS
RNF4	transcription regulator			0.0175	HES1
SRSF3	other			0.00113	E2F1,JUN
ELK4	transcription regulator			0.00207	EGR1,FOS
SDC4	other			0.0204	SOX9
ZBTB48	transcription regulator			0.00375	FOSB,SPP1
LGALS7/LGALS7B	other			0.0319	EGR1
SUB1	transcription regulator			0.00328	FOS,GADD45A
NCOA5	other			0.0103	GADD45G,MYBL1
CXCR4	G-protein coupled receptor			0.0176	EGR1,ID1
CLOCK	transcription regulator			0.00715	FABP7,GADD45A,HES6,ID1
VAV1	transcription regulator			0.00375	FOS,JUN	35 (17)
PTGER4	G-protein coupled receptor			0.0111	EGR1,SPP1,ZFP36L1
CRY2	enzyme			0.0375	FOS
BCAR1	other			0.0375	EGR1
SELE	transmembrane receptor			0.029	FOS
SCN1B	ion channel			0.000302	FOS,VIM
CDH1	other			0.00223	JUN,SOX9,VIM	35 (21)
DDB2	transcription regulator			0.0347	E2F1
GCLC	enzyme			5.09e-05	FOS,JUN
GLI2	transcription regulator			0.000435	E2F1,SOX9,SPP1,VIM
MAGED1	transcription regulator			0.0175	JUN
DLG4	kinase			0.0233	FOS
LNX2	other			0.00046	HES1,HES6
SERPINF1	other			0.0131	OLIG2,VIM
TRIB3	kinase			0.00503	ID1,PMAIP1
ALK	kinase			0.0157	FOS,METRN
ADRB3	G-protein coupled receptor			3.6e-05	EGR1,FOS,JUN	31 (24)
NR4A2	ligand-dependent nuclear receptor			0.0338	JUN,SPP1
SAFB2	other			0.00225	FOS,JUN	38 (7)
GAL	other			0.0488	FOS
ANK3	other			0.0233	SHD
AATF	transcription regulator			0.0233	JUN
RETN	other			0.0148	FOS,SPP1
NCOA3	transcription regulator			0.00339	CCN1,E2F1,HES1
LIMA1	other			0.0319	VIM
NR5A1	ligand-dependent nuclear receptor			0.0181	SOX9,VIM
P2RY1	G-protein coupled receptor			0.0204	FOS
MAP2K2	kinase			7.56e-05	E2F1,FOS,OLIG2	18 (7)
PTBP3	other			0.0261	VIM
WNT4	cytokine			0.0118	ID1,SPP1
TNFAIP2	other			0.046	VIM
FOXM1	transcription regulator			0.0017	FOS,JUN,PTTG1,VIM	47 (25)
RPS6KA4	kinase			0.00065	FOS,JUN	34 (20)
USP14	peptidase			0.0319	E2F1
HDAC6	transcription regulator			0.0088	JUN,VIM	8 (3)
OLIG1	transcription regulator			0.0204	OLIG2
TGFB1I1	transcription regulator			0.00225	FOS,ID1	29 (7)
CYP19A1	enzyme			0.0396	JUN,SOX9
EFEMP1	enzyme			0.0233	VIM
ZBTB7A	transcription regulator			0.00476	DLL4,FOS
PTX3	other			0.00559	FOS,JUN	24 (4)
ADRA1B	G-protein coupled receptor			0.000383	EGR1,FOS,JUN	31 (22)
MAPK10	kinase			0.000995	FOS,JUN	32 (16)
MAP2K5	kinase			0.000485	FOS,ID1,JUN	15 (7)
MECP2	transcription regulator			0.00258	E2F1,EGR1,PLP1,VIM	44 (24)
GNA12	enzyme			0.0232	FOS,VIM
ARHGEF25	other			0.0146	JUN
TNFSF13B	cytokine			0.00968	ID1,JUN,SPP1	35 (15)
LDLR	transporter			0.0359	EGR1,GADD45G,SPP1
ADRA1A	G-protein coupled receptor			0.000485	EGR1,FOS,JUN	30 (22)
MAOA	enzyme			0.00449	CCN1,VIM
KCNE3	ion channel			0.0176	FOSB,PLP1
DES	other			0.0261	SPP1
ADRA1D	G-protein coupled receptor			0.000383	EGR1,FOS,JUN	33 (23)
HMMR	transmembrane receptor			0.0261	VIM
TPH1	enzyme			0.00189	JUN,PCLAF,TF
ALDH3A1	enzyme			0.0146	E2F1
RXRA	ligand-dependent nuclear receptor			0.00775	FOS,GADD45G,SAT1,SPP1,TRH
RALY	transcription regulator			0.00587	E2F1
LAMA4	enzyme			0.043	DLL4,SPP1
P2RY2	G-protein coupled receptor			0.00306	JUN,TF	18 (6)
RAP1GDS1	other			0.0146	E2F1
CLCA2	ion channel			0.0347	VIM
GATAD2B	transcription regulator			0.0204	E2F1
SP3	transcription regulator			3.73e-06	E2F1,EGR1,FOS,JUN,OLIG2,PTTG1,VIM	35 (14)
MGAT3	enzyme			0.046	HES1
IL2RG	transmembrane receptor			0.0157	FOS,JUN
ATF3	transcription regulator			0.00916	ID1,JUN,PMAIP1	36 (15)
AVP	other			0.011	EGR1,FOS
RAC1	enzyme			0.000589	DLL4,FOS,JUN,SOX9	32 (18)
DIRAS3	enzyme			0.046	FOSB
ERBB4	kinase			0.00238	EGR1,GADD45A,JUN	50 (19)
NFYA	transcription regulator			2.34e-07	E2F1,EGR1,GADD45A,JUN,PMAIP1,PTTG1	27 (6)
HSPA9	other			0.00648	HES1,VIM
SLC1A2	transporter			0.00294	FOS
MAP3K1	kinase			0.000542	EGR1,FOS,JUN	33 (20)
SPHK1	kinase			0.0114	EGR1,JUN
ERBB3	kinase			0.0451	CCN1,EGR1
DAB1	other			0.0204	FABP7
P2RX4	ion channel			0.0488	VIM
OGG1	enzyme			0.0432	VIM
JAG2	growth factor			0.00588	HES1,SPP1
ARHGEF28	other			0.00587	FOS
DLGAP1	other			0.0146	VIM
ARAF	kinase			0.0233	FOS
NRG2	growth factor			1.37e-06	CCN1,E2F1,EGR1,FOSB,HES1	32 (7)
NPAT	transcription regulator			0.0319	H4C3
KIDINS220	transcription regulator			8.47e-05	EGR1,FOS	15 (7)
GPHB5	other			0.00294	FOS
IQGAP2	other			0.000757	SFRP2,WIF1
miR-6366 (miRNAs w/seed GCUAAGG)	mature microRNA			0.0357	PCLAF,TTYH1
miR-6538 (miRNAs w/seed GCGGGCU)	mature microRNA			0.0383	CLDN5,LIMCH1
miR-6387 (miRNAs w/seed GGAAUGG)	mature microRNA			0.035	SAT1,SH3BGRL3
miR-6356 (miRNAs w/seed CCCCAGA)	mature microRNA			0.0277	E2F1,FOSB,LIMCH1
miR-6513-5p (miRNAs w/seed UUGGGAU)	mature microRNA			0.0171	H2AZ1,SHD
miR-6506-3p (miRNAs w/seed CGUAUCA)	mature microRNA			0.00679	DLL1,ZFP36L2
SOCS3	phosphatase			0.00312	EGR1,FOS,JUN	28 (21)
NDRG2	other			0.0404	VIM
SCN7A	ion channel			0.00294	FOS
RNF7	enzyme			0.00294	JUN
CCN5	growth factor			0.0107	JUN,VIM
HDAC2	transcription regulator			0.0123	E2F1,EGR1,SOX9
DLL3	other			0.0117	HES1
BAP1	peptidase			0.00264	CCN1,E2F1
ATF1	transcription regulator			0.000257	EGR1,FOS,JUN	32 (10)
NOG	growth factor			0.0114	ID3,SPP1
S1PR2	G-protein coupled receptor			0.00141	FOS,JUN	32 (22)
G3BP1	enzyme			0.0233	SPP1
CARM1	transcription regulator			0.000316	FOS,GADD45A,HSP90AA1	28 (7)
PTPRR	phosphatase			0.0363	FOS,JUN
SEMA3E	other			0.0117	DLL4
STRAP	other			0.00879	JUN
CSF1R	kinase			0.00744	FOS,JUN	37 (23)
NHLH2	transcription regulator			0.0432	TRH
LMNA	other			0.00191	BAMBI,E2F1,ID3,JUN,SPP1	41 (18)
CD3E	transmembrane receptor			0.00321	E2F1,FOS,JUN	42 (22)
RASAL2	other			0.0233	VIM
EZH2	transcription regulator			0.00236	E2F1,EGR1,ID1,NEUROD1,SFRP2,WIF1	29 (6)
USP4	peptidase			0.00065	ID1,ID3
CLDN5	other			0.0117	WIF1
GRM5	G-protein coupled receptor			0.029	FOS
EP300	transcription regulator			7.29e-05	E2F1,EGR1,FOS,HES6,ID1,ID3,JUN,ZFP36L2	48 (23)
PPP2R2A	phosphatase			0.0404	SAT1
Ifi202b	other			0.0233	PTMA
ACSL4	enzyme			0.0144	SAT1,SPP1
RARB	ligand-dependent nuclear receptor			1.38e-05	EGR1,GADD45A,ID1,ID3,JUN,SPP1	31 (12)
TAC1	other			0.00231	CCN1,FOS,FOSB	37 (21)
MITF	transcription regulator			0.00754	FOS,HES1,QDPR,SOX9
HOXA9	transcription regulator			0.00204	HMGN2,JUN,SPP1,VIM
CDKN2C	transcription regulator			0.046	E2F1
H3-3A/H3-3B	other			0.046	EGR1
PANDAR	other			0.0261	PMAIP1
NOTCH2NLA/NOTCH2NLB	other			0.00294	HES1
DKK1	growth factor			0.0201	SOX9,TTYH1
DIAPH1	other			0.0261	EGR1
DYNLL1	other			0.0175	FOS
ANKS1A	other			0.00294	FOS
KCNIP3	transcription regulator			0.0211	FOS,FOSB
FZD5	G-protein coupled receptor			0.0233	SPP1
AGTR1	G-protein coupled receptor			0.00845	FOS,JUN	30 (22)
CDX2	transcription regulator			0.00163	DLL1,JUN,NEUROD1,SOX9	7 (3)
ARSA	enzyme			0.0117	E2F1
B4GALNT1	enzyme			0.0375	FOS
ETV6	transcription regulator			0.0153	DLL4,ID1
NME3	kinase			0.0146	VIM
PAX2	transcription regulator			0.000125	DKK3,DLL4,SFRP2
RANBP9	other			0.000377	FOS,JUN	15 (7)
SOX10	transcription regulator			0.000432	FOS,OLIG2,PLP1
MMP3	peptidase			0.0389	EGR1,VIM
BACE1	peptidase			0.0347	PLP1
CDCP1	other			0.029	VIM
RARG	ligand-dependent nuclear receptor			0.00269	EGR1,FOS,JUN	21 (7)
IL25	cytokine			0.000933	CLDN5,FOSB,ZFP36L1
CHRM4	G-protein coupled receptor			0.0117	EGR1
GAD1	enzyme			0.00587	FOS
SMARCA2	transcription regulator			0.0186	E2F1,HES1
E2F4	transcription regulator			3.95e-07	E2F1,H2AZ1,HMGB3,ID3,MAD2L1,PCLAF,PTTG1,UBE2T
NUMBL	other			0.0347	DLL4
DLST	enzyme			0.00879	JUN
DLK1	other			0.00679	HES1,SOX9	18 (3)
SND1	enzyme			0.000149	E2F1,ID1,VIM
SLC7A11	transporter			0.0432	VIM
PRKAR2B	kinase			0.00306	EGR1,FOS	21 (10)
PIK3CB	kinase			0.0404	DLL4
MAT2A	enzyme			0.0261	FOS
CDK6	kinase			0.0043	FOS,GADD45A,JUN	43 (16)
CD160	transmembrane receptor			0.000302	FOS,JUN
VANGL1	other			0.0261	JUN
TOR2A	other			0.00879	FOS
MAML3	transcription regulator			0.00587	HES1
SATB1	transcription regulator			0.00153	FOSB,HSP90AA1,ID3,VIM
TRAF7	enzyme			0.0319	JUN
GDNF	growth factor			0.00125	CLDN5,EGR1,FOSB	21 (7)
FAS	transmembrane receptor			0.000872	EGR1,FOS,FOSB,GADD45G,JUN,SPP1	36 (19)
TP53INP1	other			0.029	VIM
MIB1	enzyme			0.0204	HES1
VLDLR	transporter			0.0404	FOS
LMX1A	transcription regulator			0.00065	HES1,NEUROG2
ATF4	transcription regulator			0.00331	GADD45A,JUN,PMAIP1,TRPM3	25 (8)
GFRA2	transmembrane receptor			2.55e-05	EGR1,FOSB
FSCN1	other			0.0347	SOX9
TIAM2	enzyme			0.00587	VIM
CUL7	enzyme			0.0233	VIM
HNF1B	transcription regulator			0.0142	GADD45A,ID1,ID3
ABI1	other			0.0117	EGR1
JAK2	kinase			0.0111	EGR1,FOS,TF
RPS6KA2	kinase			0.00879	EGR1
NMU	other			0.00328	FOSB,ZFP36L1
NTRK1	kinase			4.71e-05	EGR1,FOS,GADD45A	48 (21)
GADD45A	other			0.00189	FOSB,JUN	16 (7)
SH2B2	other			0.0146	FOS
GCNT1	enzyme			0.00879	FOS
PTPN11	phosphatase			0.00441	EGR1,FOS,JUN	32 (19)
DNAJB6	transcription regulator			0.00113	SPP1,VIM	25 (6)
CLTC	other			0.0233	PMAIP1
AFP	transporter			0.00046	EGR1,FOS
HES7	transcription regulator			0.00587	HES1
MEOX2	transcription regulator			0.00588	ID1,ID3
OXTR	G-protein coupled receptor			0.0375	FOS
IL18	cytokine			0.00293	GADD45G,JUN,SPP1,TF	39 (23)
RELN	peptidase			0.029	FABP7
PTGS2	enzyme			0.0324	EGR1,FOS,PTMA
HOXB4	transcription regulator			0.0488	E2F1
ARID4A	transcription regulator			0.0319	E2F1
CCN2	growth factor			0.0043	EGR1,HES1,JUN	46 (21)
PAX4	transcription regulator			0.000757	INSM1,VIM
PDK1	kinase			0.0166	ID3,VIM
CD200R1	transmembrane receptor			0.0157	EGR1,JUN
POU4F3	transcription regulator			0.00587	FOS
CLIC4	ion channel			0.0107	TRPM3,VIM
RRAS2	enzyme			0.00785	EGR1,HES1,RGS16
GABRG2	ion channel			0.00587	FOS
BTK	kinase			0.048	E2F1,JUN
LASP1	transporter			0.0233	VIM
NOS1	enzyme			0.00264	EGR1,FOS	42 (14)
MEF2A	transcription regulator			0.026	FOS,JUN
MSI1	other			0.0347	HES1
E2F6	transcription regulator			0.0157	E2F1,PCLAF
ING2	transcription regulator			0.00587	SPP1
SPARC	other			0.00612	HES1,SOX9,VIM	29 (9)
ZNF350	transcription regulator			0.00879	GADD45A
INSR	kinase			0.00693	EGR1,FOS,GADD45A,RGS16,SAT1,SFRP2	35 (14)
HES5	transcription regulator			0.0375	NEUROG2
BMX	kinase			0.0404	FOS
ARRB1	transcription regulator			0.00679	EGR1,SPP1	21 (11)
SLC1A5	transporter			0.0117	VIM
KPNB1	other			1.08e-05	DLL1,INSM1,PMAIP1
MAD2L1	other			0.000236	PTTG1,SOX9
SLC12A6	transporter			0.00879	VIM
NOTCH2	transcription regulator			0.0122	HES1,SOX9
CCKAR	G-protein coupled receptor			0.0117	EGR1
SMARCB1	transcription regulator			0.00391	E2F1,FOS,HES1,SOX9	42 (15)
LAMC1	other			0.0404	VIM
TGFBR1	kinase			0.0494	CLDN5,VIM
ALCAM	other			0.0375	CLDN5
FGF19	growth factor			6.53e-06	EGR1,FOS,GADD45A,ID1,RGS16	25 (7)
GNA13	enzyme			0.00189	EGR1,FOS	34 (22)
ETS1	transcription regulator			0.0324	EGR1,SPP1,VIM
HOXA4	transcription regulator			0.0404	CCN1
PRMT1	enzyme			0.00349	HSP90AA1,OLIG2,VIM
NFATC1	transcription regulator			0.0472	NEUROD1,SPP1
OTULIN	peptidase			8.47e-05	ID1,ID3	2 (2)
TRRAP	transcription regulator			0.0432	MAD2L1
CTDSPL	other			0.00587	E2F1
MAD2L2	enzyme			0.000377	EGR1,VIM
DDX17	enzyme			0.0488	JUN
EIF2AK4	kinase			0.000542	EGR1,OLIG2,PLP1
FOXP4	transcription regulator			0.0488	VIM
F2RL3	G-protein coupled receptor			0.000127	EGR1,FOS
GPS1	other			0.0175	FOS
BIRC5	other			0.0118	PTTG1,VIM
BMPR1B	kinase			7.56e-05	ID1,ID3,SOX9	35 (16)
CMAHP	other			0.00879	VIM
CPE	peptidase			0.00351	SOX9,TRH
CUX2	transcription regulator			0.00879	DLL1
MECOM	transcription regulator			0.000103	E2F1,GADD45G,SOX9
FASN	enzyme			0.0181	SFRP2,VIM
FGF18	growth factor			0.0432	BAMBI
HECTD2	enzyme			0.0488	SPP1
OSTM1	other			0.0319	FOS
KLB	enzyme			0.00046	EGR1,FOS	24 (9)
HOXA5	transcription regulator			0.000316	EGR1,SAT1,VIM
HSPG2	enzyme			0.00503	GADD45A,HSP90AA1
IFRD1	other			0.00375	PTTG1,SPP1
Igkv1-117	other			0.029	JUN
IL2RB	transmembrane receptor			0.000995	FOS,JUN	34 (20)
KIF17	transporter			0.00587	TRPM3
DKC1	enzyme			0.0233	VIM
MYB	transcription regulator			0.0178	JUN,SPP1,VIM
KAT2B	transcription regulator			0.0122	E2F1,FOSB
RASGRF1	other			0.0347	FOS
SOX3	transcription regulator			0.0232	DLL1,SOX9
ETS2	transcription regulator			0.00141	FOS,JUN,SPP1	31 (15)
Sry	transcription regulator			0.029	GADD45G
SRY	transcription regulator			0.0375	SOX9
TRIM24	transcription regulator			0.0444	PCLAF,SPP1
SCUBE3	other			0.0261	VIM
THOC1	transcription regulator			0.0204	E2F1
SPEN	transcription regulator			0.0117	HES1
HELT	transcription regulator			0.00879	NEUROG2
EPGN	growth factor			0.00294	FOS
HSF4	transcription regulator			0.0347	VIM
ADGRE2	other			0.00531	FOS,JUN
TAF4B	transcription regulator			0.00351	JUN,SPP1
SP2	transcription regulator			0.0432	FOS
TAX1BP3	transcription regulator			0.00294	FOS
RASSF10	other			0.0233	JUN
RPS6KA5	kinase			0.00189	FOS,JUN	39 (18)
NPFF	other			0.0404	ID3
ADCYAP1R1	G-protein coupled receptor			0.0204	FOS
POSTN	other			0.000296	HES1,SPP1,VIM	30 (9)
YBX3	transcription regulator			0.0261	JUN
GRB10	other			0.0347	FOS
FAAH	enzyme			0.00449	FOS,TRH
CCR4	G-protein coupled receptor			0.0204	FOS
GABBR1	G-protein coupled receptor			0.00141	SPP1,VIM
ALPL	phosphatase			0.00879	SPP1
PRNP	other			0.0238	EGR1,SOX9
NDRG1	kinase			0.00131	FOS,JUN,VIM	47 (23)
NKX3-2	transcription regulator			0.0204	SOX9
THY1	other			0.0488	VIM
RAMP3	G-protein coupled receptor			8.51e-06	FOS,VIM
APEX1	enzyme			0.000114	EGR1,FOS,FOSB	28 (7)
MVP	other			0.00172	FOS,JUN	28 (11)
TAFAZZIN	enzyme			0.011	CCN1,HSP90AA1,MAD2L1,PMAIP1
PRKCB	kinase			0.00111	EGR1,FOS,JUN	27 (19)
ATP7A	transporter			0.0319	PLP1
FANCE	other			0.00294	HES1
TP53BP2	other			0.029	VIM
LAMA2	other			0.0375	CLDN5
PPID	enzyme			0.0175	VIM
HDAC4	transcription regulator			0.000933	DLL4,FOS,GADD45A,JUN	28 (8)
PPP1CA	phosphatase			0.000302	FOS,SPP1	16 (7)
ITGB1BP1	other			0.000177	DLL1,DLL4
EIF5A2	translation regulator			0.0175	VIM
TRPA1	transporter			0.029	FOS
GSTO1	enzyme			0.0157	SAT1,ZFP36L1
KIRREL1	other			0.0233	CCN1
RTKN	other			0.000302	FOS,VIM
PTHLH	other			0.0243	FOS,SOX9
KRIT1	other			0.00065	DLL4,JUN
CDK5	kinase			0.000149	JUN,PLP1,PMAIP1
SMAD5	transcription regulator			0.00399	ID1,ID3
GTF2I	transcription regulator			0.0432	FOS
EFNA1	other			0.0176	SOX9,UBE2S
PPP3CA	phosphatase			0.00261	SPP1,TF,VIM
PEA15	transporter			0.029	JUN
CDC23	enzyme			0.00587	PTTG1
EEF2K	kinase			0.0175	VIM
PLAT	peptidase			0.00503	FOS,JUN	35 (22)
GRIN3A	ion channel			0.0444	TRPM3,WIF1
ITPR1	ion channel			0.0488	FOS
AKAP13	other			0.0117	FOS
SCX	transcription regulator			3.12e-05	ID1,SOX9,SPP1
HIVEP3	transcription regulator			0.0319	JUN
CDK5R2	other			0.00879	FOS
RAPGEF4	other			0.0204	SPP1
IL6ST	transmembrane receptor			0.0216	EGR1,JUN
CDC20	other			0.0204	PTTG1
MCAM	other			0.000302	ID1,VIM
NEU3	enzyme			0.0233	EGR1
miR-6802-3p (miRNAs w/seed UCACCCC)	mature microRNA			0.0246	E2F1,FOSB,ZFP36L2
miR-219c-3p (miRNAs w/seed GAGAAUU)	mature microRNA			0.0196	GADD45A,SAT1
miR-6814-3p (and other miRNAs w/seed CUCGCAU)	mature microRNA			0.00952	QDPR,RGS16
miR-6748-3p (miRNAs w/seed CCUGUCC)	mature microRNA			0.0223	BAMBI,EGR1,HMGN2
miR-519d-5p (miRNAs w/seed CUCCAAA)	mature microRNA			0.0338	HMGN2,SAT1
miR-4433b-3p (miRNAs w/seed AGGAGUG)	mature microRNA			0.043	SFRP2,VIM
miR-8101 (miRNAs w/seed GCGAGCG)	mature microRNA			0.00916	ID1,ZFP36L1
miR-7233-5p (miRNAs w/seed GUUAGGG)	mature microRNA			0.043	PRSS35,SFRP2
miR-6869-3p (miRNAs w/seed GCCGCGC)	mature microRNA			0.00339	CLDN5,GADD45G,IDH2
miR-7112-5p (miRNAs w/seed CGGGCAG)	mature microRNA			0.0234	FOS,FOSB,HES4
miR-6883-3p (miRNAs w/seed UCCCUAU)	mature microRNA			0.0265	PRSS35,WIF1
miR-7671-3p (miRNAs w/seed AGCGGGC)	mature microRNA			0.0389	CLDN5,OLIG2
miR-6999-3p (miRNAs w/seed UUCAGCU)	mature microRNA			0.0451	MFAP4,PCLAF
miR-6978-3p (miRNAs w/seed CGGCUUC)	mature microRNA			0.043	DLL4,SCG3
miR-7672-3p (miRNAs w/seed CGGCUGC)	mature microRNA			0.00534	CCN1,SH3BGRL3,SHD
miR-7975 (miRNAs w/seed UCCUAGU)	mature microRNA			0.0157	FABP7,PLP1
miR-7088-3p (miRNAs w/seed UGACCUU)	mature microRNA			0.0271	DAPL1,H4C3
miR-6868-3p (miRNAs w/seed UCCUUCU)	mature microRNA			0.0188	GADD45A,PLP1,QDPR
miR-6739-3p (miRNAs w/seed UUGUUCU)	mature microRNA			0.0403	PMAIP1,ZFP36L2
miR-6732-3p (miRNAs w/seed AACCCUG)	mature microRNA			0.0201	BAMBI,SPP1
miR-6895-3p (miRNAs w/seed GUCUCUC)	mature microRNA			0.00916	BAMBI,JUN,VSTM2B
miR-7678-5p (miRNAs w/seed UACAAGG)	mature microRNA			0.0331	SH3BGRL3,UBE2T
miR-8064 (miRNAs w/seed GCACACU)	mature microRNA			0.00625	E2F1,GADD45A,PMAIP1
miR-7663-5p (and other miRNAs w/seed CUGCUUG)	mature microRNA			0.041	H4C3,SPP1
miR-6859-3p (miRNAs w/seed GACCCCC)	mature microRNA			0.0277	HES4,HMGB3,PLP1
PAX9	transcription regulator			0.0347	SOX9
mir-10	microRNA			0.0444	CCN1,E2F1
RND3	enzyme			0.00172	HES1,VIM
CCAT2	other			0.0488	VIM
BLACAT1	other			0.0233	VIM
FOSB	transcription regulator			0.00531	FOS,FOSB
GAST	other			0.000121	EGR1,FOS,HES1,JUN	43 (23)
Smad2/3/4	group			0.046	ID1
BTG1	transcription regulator			0.0175	JUN
KRT17	other			0.00588	SPP1,VIM
IL15	cytokine			0.0125	BAMBI,JUN,PMAIP1,RGS16,ZFP36L1
BMP7	growth factor			0.0051	ID1,ID3,SPP1,VIM	31 (13)
BMP6	growth factor			0.00358	E2F1,ID1,ID3	18 (10)
CD99	other			0.0261	FOSB
MS4A1	other			0.046	ZFP36L1
CCR1	G-protein coupled receptor			7.56e-05	FOS,SPP1,VIM	33 (12)
HNRNPU	transporter			0.00102	NEUROD1,SOX9,SPP1
MFAP5	other			0.000542	DLL4,FAM131C,SPP1
NF1	other			0.00648	OLIG2,SOX9
PTGER1	G-protein coupled receptor			0.0375	FOS
MAML1	transcription regulator			1.92e-05	EGR1,HES1,HES4
HNRNPD	transcription regulator			0.046	FOS
HP	peptidase			0.0261	FOS
HIPK2	kinase			0.0211	EGR1,VIM
GRN	growth factor			0.018	EGR1,FOS,SPP1
PAX3	transcription regulator			0.00277	CLDN5,FABP7,ID3,ZFP36L2
DRD2	G-protein coupled receptor			0.00238	FOS,FOSB,JUN	26 (18)
CUL4B	other			0.0088	E2F1,ID1
MMP1	peptidase			0.000513	E2F1,FOS,JUN	40 (16)
CISH	other			0.0221	ID3,SPP1
ATOH1	transcription regulator			0.00531	DLL1,HES1
EIF2AK2	kinase			0.00339	EGR1,FOS,JUN	33 (19)
EDNRA	transmembrane receptor			0.0432	FOS
GLP1R	G-protein coupled receptor			0.0233	FOS
HDAC1	transcription regulator			2.54e-06	BAMBI,EGR1,FOS,HES1,ID1,PMAIP1,SOX9,SPP1	51 (23)
TAF6	transcription regulator			0.000136	GADD45A,HES1,JUN
GRAP	other			0.00587	FOS
ASPM	other			0.0233	SOX9
PROKR1	G-protein coupled receptor			0.0233	VIM
HIVEP2	transcription regulator			0.0175	FOS
XPA	other			0.0204	FOS
RAB7A	enzyme			4.84e-07	EGR1,FOS,VIM	36 (13)
S1PR3	G-protein coupled receptor			0.00113	FOS,JUN	35 (22)
CFL1	other			0.0117	JUN
RAB5B	enzyme			0.00294	FOS
CRY1	enzyme			0.0375	FOS
PCGF2	transcription regulator			0.00648	HES1,VIM
STAT5A	transcription regulator			0.00175	FOS,FOSB,GADD45A,GADD45G,ID1	43 (19)
TOPBP1	other			0.0432	GADD45A
NR5A2	ligand-dependent nuclear receptor			0.00695	FOS,GADD45G,JUN	10 (3)
MPL	transmembrane receptor			0.0261	FOS
TNKS1BP1	other			0.000127	JUN,SOX9	24 (6)
PTK2B	kinase			0.00141	FOS,JUN	31 (17)
TRMT13	other			0.00879	VIM
TNFSF10	cytokine			0.00801	FOS,JUN,PMAIP1	38 (26)
SP7	transcription regulator			0.00141	SOX9,SPP1
POU2AF1	transcription regulator			0.000524	GADD45G,ID3,IDH2,SPP1
ITK	kinase			0.0271	FOS,TF
E2F2	transcription regulator			0.0206	E2F1,ID1
FOXA1	transcription regulator			0.0154	NEUROG2,SOX9,TF
DDX5	enzyme			0.0472	FOS,JUN
EPOR	transmembrane receptor			0.00328	JUN,TF
EMSLR	other			0.00294	E2F1
TCL1A	transcription regulator			0.0283	FABP7,FOS
ELK3	transcription regulator			0.00046	EGR1,FOS
EHF	transcription regulator			0.0325	E2F1,ZFP36L1
CGA	other			0.00358	CLDN5,E2F1,ID1
SPIB	transcription regulator			0.035	DLL1,EGR1
FRAT1	other			0.00587	JUN
KLF5	transcription regulator			0.00388	ID3,JUN,ZFP36L1
CBFA2T3	transcription regulator			0.0186	INSM1,NEUROD1
VAV2	transcription regulator			0.00375	FOS,VIM	31 (10)
RACGAP1	transporter			0.0233	JUN
PLCL1	enzyme			0.00113	E2F1,ID1
SAFB	other			0.0114	FOS,JUN
DIO2	enzyme			0.00122	EGR1,FOS,FOSB,GADD45G
IL7	cytokine			0.0095	E2F1,PMAIP1,RGS16
DBH	enzyme			0.0319	FOS
POU4F2	transcription regulator			0.000191	ATOH7,NEUROD1,NEUROG2
ARHGEF11	other			0.00879	FOS
RAB11FIP1	other			0.00879	VIM
GALP	other			0.0233	FOS
JMJD1C	enzyme			0.00046	EGR1,ID1	17 (4)
CDK2	kinase			0.000337	E2F1,FOS,PTTG1	35 (12)
SP110	transcription regulator			0.00849	CCN1,DLL4,E2F1
RHOA	enzyme			0.00409	FOS,JUN,SOX9	33 (20)
Gm12602	other			0.046	RGS16
FZD2	G-protein coupled receptor			0.0204	SPP1
OPRM1	G-protein coupled receptor			0.0375	VIM
ATF5	transcription regulator			0.029	ID1
FZD4	G-protein coupled receptor			0.0375	VIM
TNFSF15	cytokine			0.00811	SPP1,VIM	24 (7)
SMO	G-protein coupled receptor			0.00223	PRSS35,SOX9,WIF1
TEAD2	transcription regulator			0.00989	CCN1,LIMCH1
QKI	other			0.00231	FABP7,ID1,VIM	22 (7)
UBE2V1	transcription regulator			0.00587	FOS
GHRL	growth factor			0.0206	FOS,SPP1
TGFB2	growth factor			0.000422	EGR1,FOS,SPP1,VIM	43 (19)
CHD4	enzyme			0.0201	E2F1,JUN
MST1R	kinase			9.33e-05	FOS,JUN,VIM	46 (23)
SERPIND1	other			0.0175	EGR1
PPP1CB	phosphatase			0.00294	E2F1
CCN1	other			0.00231	CCN1,JUN,WIF1
EFNA2	kinase			0.0122	SOX9,UBE2S
CREBBP	transcription regulator			0.000202	CCN1,EGR1,FOS,FOSB,JUN,NEUROD1,ZFP36L2	33 (16)
BAG1	other			7.05e-06	FOS,GADD45A,JUN,VIM	49 (24)
EXOSC10	kinase			0.00879	FOS
NR1D1	ligand-dependent nuclear receptor			0.00648	EGR1,FOS
NEDD9	other			0.00231	FOS,TF,VIM
IL16	cytokine			0.046	FOS
FASLG	cytokine			0.00952	EGR1,FOS	35 (20)
ZBTB17	transcription regulator			0.000101	EGR1,JUN,PBK,PMAIP1	27 (6)
CAMK2A	kinase			0.029	FOS
GNAQ	enzyme			0.00103	EGR1,FOS,GADD45A,ZFP36L1	33 (19)
RING1	transcription regulator			5.09e-05	FOS,JUN
Hmgn2 (includes others)	other			0.00294	SOX9
MTUS1	other			0.0175	VIM
MYZAP	other			0.0319	FOS
CDKN1C	other			0.029	E2F1
Cdkn1c	other			0.00225	E2F1,EGR1
IFITM3	other			0.0186	DLL1,SPP1
SYNCRIP	other			0.0375	VIM
BRMS1	transcription regulator			0.029	SPP1
Nrg1	growth factor			0.0146	FOS
CHRM2	G-protein coupled receptor			0.00294	EGR1
ACP1	phosphatase			0.0117	FOS
NEK2	kinase			0.029	GADD45A
ACTA2	other			0.0233	VIM
NCOA6	transcription regulator			0.0347	FOS
Ncoa6	transcription regulator			0.0319	FOS
CUX1	transcription regulator			0.0196	H4C3,VIM
AMELX	growth factor			0.0117	SOX9
ARF1	enzyme			0.0117	E2F1
BEX2	other			0.0347	SPP1
H4C3	other			0.0204	FOSB
CDC42	enzyme			0.000162	FOS,JUN,SOX9	35 (22)
COPS2	other			0.00294	E2F1
EWSR1	other			0.000176	FOS,PBK,PCLAF
FLT1	kinase			0.00195	DLL4,FOS,SOX9	29 (13)
HELLS	enzyme			0.0488	E2F1
HIC1	transcription regulator			0.0139	SOX9,SPP1
Hspa1b	enzyme			0.00879	FOS
HSPA1A/HSPA1B	enzyme			0.0375	FOS
Irs4	other			0.00879	EGR1
HAVCR1	other			0.0403	CCN1,JUN
Mt1	other			0.00285	FOS,JUN	26 (13)
Mt2	other			0.00225	FOS,JUN
Nedd4	enzyme			0.029	SOX9
PLN	transporter			0.000891	DLL1,HES1,VIM	6 (3)
SRGN	other			0.0175	VIM
PODXL	kinase			0.0204	VIM
Esrra	ligand-dependent nuclear receptor			0.0458	SOX9,SPP1
TBX2	transcription regulator			0.0211	E2F1,MAD2L1
TCF7	transcription regulator			0.0103	FOS,SPP1
PAK2	kinase			0.000191	GADD45A,ID1,ID3
Brd4	kinase			0.0204	FOS
BRD4	kinase			0.000167	FOS,GADD45A,INSM1,PMAIP1,SPP1	27 (6)
PCDH11Y	other			0.00172	JUN,SFRP2
Map3k7	kinase			0.0201	JUN,SOX9
MAML2	transcription regulator			0.00587	HES1
H1-1	other			0.00879	FOS
SAC3D1	other			0.00294	MAD2L1
TREM2	transmembrane receptor			0.0186	BAMBI,WIF1
ILF2	transcription regulator			0.029	FOS
DSCAML1	other			0.00238	ATOH7,GADD45G,ID3
RPS4Y1	other			0.00587	VIM
TBPL1	transcription regulator			0.0117	FOS
FADD	other			0.00223	EGR1,FOS,JUN	42 (23)
POU2F2	transcription regulator			0.0331	JUN,SPP1
ADM	other			0.0127	FOS,SPP1
PBX2	transcription regulator			0.0233	FOS
BUB1B	kinase			0.00879	PTTG1
EBI3	cytokine			0.0127	FOS,GADD45G
PPP2R5B	phosphatase			0.0146	SAT1
ATAD2	enzyme			0.00879	E2F1
GCLM	enzyme			8.47e-05	FOS,JUN
RASA1	transporter			0.0204	FOS
EMD	other			0.00156	E2F1,EGR1
SMAD6	transcription regulator			0.00113	SOX9,SPP1	24 (8)
SLC20A2	transporter			0.0146	SPP1
GNRH2	other			2.02e-06	FOS,FOSB,JUN	27 (11)
NOC2L	transcription regulator			0.0117	PMAIP1
NRTN	growth factor			0.00141	EGR1,FOSB
BACH2	transcription regulator			0.0191	ID3,JUN
AZGP1	transporter			0.00264	EGR1,VIM
SPINT1	other			0.0432	WIF1
BRAF	kinase			0.00126	CCN1,EGR1,JUN,NEUROG2,VIM	37 (23)
ATF2	transcription regulator			8.53e-06	EGR1,FOS,GADD45A,JUN,TF	43 (23)
WT1	transcription regulator			0.0424	EGR1,FOSB,SOX9
PITX1	transcription regulator			0.0375	SOX9
GDF11	growth factor			0.00131	BAMBI,FOS,SPP1
HDAC8	transcription regulator			0.0488	VIM
FZD6	G-protein coupled receptor			0.0175	SPP1
ARHGDIA	other			0.0432	FOS
PTGES	enzyme			0.000813	EGR1,PTMA,VIM
SERPINH1	other			0.0261	VIM
TLR3	transmembrane receptor			0.0444	FOS,ID1,PMAIP1
ID4	transcription regulator			0.000757	E2F1,VIM
ZYX	other			0.0175	FOS
NEUROD2	transcription regulator			0.0319	TRH
DPYSL2	enzyme			0.0117	VIM
GNA15	enzyme			0.000347	GADD45A,HES1,PRSS35,ZFP36L1
VGF	growth factor			0.0204	FOS
mir-3648	microRNA			0.029	JUN
STMN1	other			0.00156	EGR1,TUBA1B	7 (3)
RPL9	other			0.00294	VIM
PSENEN	peptidase			0.0204	DLL1
CHCHD2	other			2.02e-06	HES1,ID1,SPP1
SOD1	enzyme			0.0015	FOS,JUN,MYBL1,SH3BGRL3,SPP1	47 (18)
Hotairm1	other			0.0261	SPP1
PCCA-DT	other			0.0117	VIM
WAKMAR1	other			0.00449	E2F1,FOS
Immunoglobulin Lambda Light Chain	group			0.0204	PMAIP1
HNRNPAB	enzyme			0.00156	SPP1,VIM
HULC	other			0.0375	VIM
histone deacetylase	complex			0.00648	CCN1,NEUROD1
Hif	complex			0.046	TF
mir-30	microRNA			0.000542	DLL4,GADD45A,VIM
Muscarinic cholinergic receptor	group			8.44e-07	CCN1,FOS,JUN	36 (18)
growth factor	group			0.0404	FOS
Laminin5	complex			0.0347	SPP1
Ngf	group			0.00131	EGR1,FOS,JUN	34 (21)
CALC	group			0.0432	FOS
TCF	group			0.000158	EGR1,FOS,ID3,SOX9	32 (9)

## Sheet: T2
Upstream Regulator	Molecule Type	Predicted Activation State	Activation z-score	p-value of overlap	Target Molecules in Dataset	Mechanistic Network
IL15	cytokine	Activated	3.244	6.87e-11	BAMBI,CCND1,CDK6,ENO1,GAPDH,GPI,HIF1A,ID4,JUN,JUNB,LDHA,MIF,PFKFB3,PFKP,PGK1,PIK3R1,PKM,PYGL,RGS16,SLC16A3,SMAD2,TNNI1,TPI1,VEGFA,ZFP36L1	146 (25)
HIF1A	transcription regulator	Activated	2.735	2.68e-18	BNIP3,CCN1,CCND1,CD24,CDH2,CYB5A,DDIT4,ENO1,FAM162A,FOS,FSCN1,GAPDH,GPI,HES6,HIF1A,HILPDA,HSPB1,ID1,IGFBP2,JUN,L1CAM,LDHA,LOXL1,MIF,NR4A1,PFKFB3,PFKP,PGK1,PKM,SLC16A3,SMAD2,SOX9,STC2,TPI1,VEGFA,VIM,ZNF608	143 (19)
Hif1	complex	Activated	2.729	3.82e-11	BNIP3,CCNG2,CD24,DDIT4,ENO1,GPI,LDHA,PGK1,PKM,SLC16A3,TF,VEGFA	104 (7)
FOXA2	transcription regulator	Activated	2.709	4.48e-10	CCND1,DDIT4,FABP5,GAL,HES6,MAP1B,MTUS1,ONECUT2,PAX6,PFKP,PKM,PPP1R14A,PPP1R14C,PTPRF,PYGL,ST18,TBX3,TF,THBS3,TNNI1,VIM	38 (3)
SIGLEC8	transmembrane receptor	Activated	2.646	2.16e-07	BNIP3,FAM162A,FTL,HILPDA,MIF,PGK1,TPI1	104 (7)
SLC2A3	transporter	Activated	2.621	1.65e-10	GAPDH,GPI,LDHA,PFKFB3,PFKP,PKM,TPI1
APOE	transporter	Activated	2.598	0.00295	CABP1,CCN1,CCND1,DBI,EGR1,FABP5,FOS,JUN,PTP4A3,SOX9,SPP1	122 (21)
ESRRG	ligand-dependent nuclear receptor	Activated	2.574	0.000349	ATP1A3,ENO1,GAPDH,LDHA,PKM,TPI1,VEGFA	116 (7)
miR-124-3p (and other miRNAs w/seed AAGGCAC)	mature microRNA	Activated	2.521	0.0157	CDK6,CYB5A,EGR1,ETFB,HES1,LHX2,LIMCH1,MYO10,SOX8,SOX9,TF,VIM,ZFP36L2
MTOR	kinase	Activated	2.485	6.46e-07	BNIP3,CCND1,DDIT4,DUSP1,ENO1,FABP5,FOS,HIF1A,HSPB1,LDHA,PFKP,PKM,PLP1,RHEB,SLC16A3,SOX4,VEGFA	142 (18)
MYO1B	other	Activated	2.446	6.57e-10	GAPDH,GPI,HIF1A,LDHA,PGK1,PKM	89 (7)
BHLHE40	transcription regulator	Activated	2.443	0.000239	B2M,CD9,HIF1A,HILPDA,ID1,LDHA,MYB,PFKFB3,PFKP,PGK1,RGS16,SLC16A3	103 (12)
miR-5624-3p (and other miRNAs w/seed UAAGGCA)	mature microRNA	Activated	2.425	0.303	FABP5,GAS1,MYO10,QDPR,SOX9,ZNF608
BRCA1	transcription regulator	Activated	2.401	3.48e-05	CCND1,DDIT4,EGR1,GADD45A,HSPB1,PARP1,SAT1,SMAD2,VEGFA,VIM	141 (20)
miR-21-5p (and other miRNAs w/seed AGCUUAU)	mature microRNA	Activated	2.376	0.0158	CDK6,KDR,LUM,MYBL1,PIK3R1,SPRY2
NFE2L2	transcription regulator	Activated	2.343	0.00648	BNIP3,FTL,FXYD1,GADD45G,KDR,L1CAM,MGLL,PIK3R1,RUNX1T1,SAT1,SLC6A9,TPI1,VEGFA
miR-155-5p (miRNAs w/seed UAAUGCU)	mature microRNA	Activated	2.319	3.25e-07	CCN1,CCND1,CDH2,DNAJB1,FOS,GATM,MYB,MYO10,PHC2,PIK3R1,RHEB,SLCO5A1,SMAD2,TLE4,VIM,ZNF385D	81 (7)
KLF6	transcription regulator	Activated	2.304	5.83e-08	BSG,CDH2,CYB5A,GAPDH,HIF1A,JUNB,KDM6B,LDHA,NR4A1,PFKFB3,PFKP,PGK1,PKM,SLC16A3,TPI1,VEGFA	110 (11)
IL5	cytokine	Activated	2.261	1.99e-08	BNIP3,CD24,CD9,EGR1,ENO1,FAM162A,GADD45A,GADD45G,HIF1A,IER2,LUM,PFKP,PKM,S100A6,SLC16A3,TPI1,VIM	136 (15)
PSME3	peptidase	Activated	2.236	7.83e-07	ENO1,GAPDH,LDHA,PKM,TPI1	20 (4)
miR-450a-5p (and other miRNAs w/seed UUUGCGA)	mature microRNA	Activated	2.236	0.00589	FBXW7,SMAD2,SOX2,SPP1,VIM
CD38	enzyme	Activated	2.228	9.19e-05	BNIP3,FAM162A,GADD45G,PFKP,PKM,S100A6,SLC16A3,TPI1,VIM
ARNT	transcription regulator	Activated	2.205	4.27e-10	BAMBI,BNIP3,ENO1,GAPDH,GAS1,GPI,HES6,HIF1A,LDHA,PGK1,SOX2,SPP1,TPI1,VEGFA,VIM	140 (17)
TGFB2-AS1	other	Activated	2.186	0.00156	E2F1,FOS,LUM,SELENOP,SOX2	80 (7)
miR-541-5p (and other miRNAs w/seed AAGGAUU)	mature microRNA	Activated	2.186	0.0176	CCDC34,CCND1,CDH2,LUM,VIM
THRB	ligand-dependent nuclear receptor	Activated	2.133	5.98e-06	ATP1A3,CCND1,CDK6,E2F1,FOS,HIF1A,ID1,IGFBP2,JUN,NR4A1,PTTG1,SFRP2,SPP1,WIF1	134 (20)
PALMD	other	Activated	2.121	2.18e-10	ENO1,HIF1A,LDHA,PFKFB3,PGK1,PIK3R1,PKM,TPI1
RB1	transcription regulator	Activated	2.116	2.35e-09	BNIP3,CCND1,DEK,DUSP1,E2F1,EGR1,FAM111A,FOS,FOSB,FXYD1,GADD45A,HES1,HIF1A,ID1,IFITM3,JUN,JUNB,KDR,MYB,PARP1,PCLAF,PRSS23,PTTG1,VEGFA	152 (24)
TP73	transcription regulator	Activated	2.08	1.1e-05	B2M,CCN1,CCNG2,CDK6,CDKN1C,DDIT4,E2F1,EGR1,GADD45A,HES1,HIF1A,LDHA,PTP4A3,SAT1,SPP1,TBX3,TNNI1,VEGFA	153 (20)
let-7	microRNA	Activated	2.005	0.000318	CCND1,CDH2,CDK6,GPI,NR2E1,PKM,SMAD2,SOX2,SOX9,VIM	138 (24)
CENPN	other	Activated	2	8.95e-07	ENO1,LDHA,PFKFB3,PKM
SIX2	transcription regulator	Activated	2	0.00479	CDKN1C,PAX6,PGK1,TPI1
miR-519a-3p (and other miRNAs w/seed AAGUGCA)	mature microRNA	Activated	2	0.188	DDHD1,LUM,MYBL1,TOX3
miR-3910 (miRNAs w/seed AAGGCAU)	mature microRNA	Activated	2	0.0478	FABP7,MYBL1,ZFP36L2,ZNF608
miR-652-5p (miRNAs w/seed AACCCUA)	mature microRNA	Activated	2	0.0152	B2M,GPM6B,H4C3,TLE5
miR-5689 (miRNAs w/seed GCAUACA)	mature microRNA	Activated	2	0.102	FABP5,OTX2,PRSS35,SORCS1
miR-6366 (miRNAs w/seed GCUAAGG)	mature microRNA	Activated	2	0.0239	FXYD1,PCLAF,RLBP1,TTYH1
MEOX2	transcription regulator	Activated	2	0.000809	CDKN1C,ID1,ID3,ID4
mir-23	microRNA	Activated	2	5.02e-07	CCND1,E2F1,GATM,HIF1A,LDHA,SPP1,SPRY2	134 (15)
T3-TR-RXR	complex		1.982	0.000979	CAMK4,ENO1,PFKP,SLC16A3
XBP1	transcription regulator		1.982	0.124	E2F1,RAB3A,S100A6,SEC61G,SSR4
PKD1	ion channel		1.982	0.192	CCN1,FOSB,GATM,IER2
FAS	transmembrane receptor		1.982	0.000263	ARRB2,EGR1,FOS,FOSB,FSCN1,GADD45G,JUN,LUM,MIF,NR4A1,RHEB,SPP1,VEGFA	121 (22)
PCGF2	transcription regulator		1.97	0.000979	CDH2,CDK6,HES1,VIM	94 (11)
SP3	transcription regulator		1.965	2.32e-09	CCND1,CDH2,CHRNA3,COL2A1,DNM1,DUSP1,E2F1,EGR1,FOS,JUN,KDR,PGK1,PKM,PTTG1,VEGFA,VIM	171 (24)
SETD2	enzyme		1.964	0.00139	CCN1,CCND1,CDH2,JUN	74 (7)
Laminin (complex)	complex		1.953	9.68e-05	CCND1,ETV5,PTPRF,STMN2,VIM	138 (22)
SOCS1	other		1.951	0.0695	CCND1,DUSP1,FOS,JUN
IL6R	transmembrane receptor		1.934	0.0164	CCK,COL2A1,GAL,VEGFA
PAX6	transcription regulator		1.903	7.94e-08	ASCL1,CCND1,CDK6,CELF4,FABP7,HES1,L1CAM,OTX2,PCSK1N,SMAD2,SOX2,TRPM3,VEGFA,VSX2
mir-29	microRNA		1.89	1.51e-05	CCND1,CDH2,CDK6,PIK3R1,SFRP2,VEGFA,VIM,ZFP36L1	157 (22)
RAG2	enzyme		1.89	0.000164	EPHA4,ID1,MIF,NKD2,PLXNA2,PTP4A3,ZNF385A
miR-1306-3p (miRNAs w/seed CGUUGGC)	mature microRNA		1.89	0.00181	ASCL1,MCAM,MIDN,NR2E1,PCLAF,STON2,ZFP36L2
AGTRAP	G-protein coupled receptor		1.889	1.09e-08	ENO1,FOS,LDHA,PGK1,PKM,VEGFA	110 (12)
VHL	transcription regulator		1.823	3.89e-14	BNIP3,CCND1,CDH2,CDKN1C,E2F1,FTL,HIF1A,IFITM3,LDHA,MIF,NREP,PFKFB3,SEC61G,SLC16A3,SLC1A3,VEGFA,VIM,ZFP36L1	146 (22)
ATF4	transcription regulator		1.809	0.00196	DDIT4,GADD45A,IGFBP2,JUN,SLC6A9,STC2,TRPM3,VEGFA	135 (14)
PCGEM1	other		1.798	5.64e-06	ENO1,GAPDH,GPI,LDHA,PGK1,PKM	107 (7)
ESRRA	transcription regulator		1.789	1.7e-06	ACKR3,ATP1A3,CDH2,CKB,CYB5A,DEK,ENO1,FZD5,GAPDH,LDHA,PKM,SPP1,TPI1,VASH2,VEGFA	132 (12)
DICER1	enzyme		1.741	5.41e-05	CCN1,CCND1,CRYM,EGR1,FOS,HES1,ID3,JUN,KDR,MCAM,SOX2,SPRY2,VIM	148 (22)
FOXA1	transcription regulator		1.722	0.000701	CDH2,DDIT4,PAX6,PPP1R14C,SOX9,TF,THBS3,TNNI1	84 (8)
DACH1	transcription regulator		1.706	3.07e-07	EGR1,FOS,ID1,IER2,JUN,SOX2,STC2	126 (14)
CDH1	other		1.682	3.88e-08	CCND1,CDH2,CDK6,JUN,MCAM,PFKFB3,PIK3R1,SOX9,VEGFA,VIM	155 (24)
NEUROG3	transcription regulator		1.671	0.00108	CCK,CDH2,HES6,NHLH1,PAX6,ST18
Hdac	group		1.641	4.06e-09	CCND1,CCNG2,EGR1,FOS,HIF1A,JUN,NR4A1,ONECUT2,SFRP2,SPP1,SPRY2,TBX3,TFAP2B,WIF1	149 (20)
miR-615-3p (miRNAs w/seed CCGAGCC)	mature microRNA		1.633	0.0227	CELF3,GAS1,LGI4,RAX,SMIM20,TLE5
miR-7112-5p (miRNAs w/seed CGGGCAG)	mature microRNA		1.633	0.0257	FOS,FOSB,HES4,RHEB,SPATS2L,VSX2
PAK2	kinase		1.633	3.08e-06	CKB,DUSP1,GADD45A,ID1,ID3,S100A6	107 (7)
Brd4	kinase		1.633	0.000194	ENO1,GPI,KDR,PGK1,PKM,SOX2,SPON2	108 (7)
HDAC4	transcription regulator		1.616	3.25e-05	CCND1,FOS,GADD45A,HIF1A,IFITM3,JUN,LDHA,NR4A1,VEGFA	140 (23)
mir-8	microRNA		1.607	2.18e-06	CCND1,CCNG2,CDH2,CDK6,DUSP26,HIF1A,KDR,SMAD2,SOX2,SOX9,SPRY2,VIM	103 (21)
ZFP36	transcription regulator		1.513	0.0037	E2F1,FOS,HIF1A,JUN,SPP1	139 (20)
KDM8	enzyme		1.51	1.21e-06	CD24,ENO1,GAPDH,ID1,LDHA,PKM,SOX9,VEGFA	101 (11)
PRDM1	transcription regulator		1.481	0.016	CDK6,DDIT4,FNDC5,FOS,ID3,RGS16,SOX8,VSX2
RUNX3	transcription regulator		1.452	0.00314	CCN1,CCND1,SPP1,SSX2IP,STC2,VIM	132 (18)
STAT4	transcription regulator		1.421	7.92e-06	BSG,ETV5,FSCN1,GADD45G,HES6,HILPDA,KDM6B,PYGL,RGS16,SAT1,STC2,VEGFA	106 (7)
TLR4	transmembrane receptor		1.42	1.57e-05	BAMBI,CCN1,CDK6,FOS,GADD45G,IFITM3,KDM6B,LDHA,LHX2,MIF,NR4A1,PKM,RGS16,SLCO3A1,SPP1,TSC22D1	143 (21)
STK11	kinase		1.414	2.23e-11	CCND1,ENO1,GADD45A,GAPDH,GPI,HIF1A,HILPDA,ID1,JUNB,LDHA,LUM,MCAM,NR4A1,PGK1,PHC2,PKM,SPP1,TPI1,TTYH1,VEGFA,VIPR2	155 (24)
miR-329-3p (and other miRNAs w/seed ACACACC)	mature microRNA		1.414	0.0105	DNAJB1,E2F1,EPHA4,H4C3,MCAM,PCLAF,PPP1R14C,PTTG1
PPARGC1A	transcription regulator		1.405	0.000472	BNIP3,COL2A1,ENO1,FNDC5,FOS,HIF1A,LDHA,LUM,NR4A1,PIK3R1,RLBP1,SOX2,TNNI1,VEGFA	153 (23)
HTATIP2	transcription regulator		1.387	3.32e-09	CCND1,CDH2,FOS,PKM,SOX2,SPP1,VEGFA	130 (22)
BNIP3L	other		1.387	0.000473	E2F1,GADD45A,GAPDH,PFKFB3,PKM
miR-548v (miRNAs w/seed GCUACAG)	mature microRNA		1.342	0.0112	CDK6,DDIT4,HES4,MYBL1,WIF1
miR-3066-5p (miRNAs w/seed UGGUUGC)	mature microRNA		1.342	0.00885	H4C3,LRRN3,OTX2,PIK3R1,SPRY2
miR-532-5p (and other miRNAs w/seed AUGCCUU)	mature microRNA		1.342	0.0424	DDHD1,GATM,PRSS23,PRSS35,RLBP1
miR-875-3p (miRNAs w/seed CUGGAAA)	mature microRNA		1.342	0.00566	CDK6,DNAJB1,MAP1B,ONECUT2,SELENOP
miR-4307 (miRNAs w/seed AUGUUUU)	mature microRNA		1.342	0.000315	CCND1,LIMCH1,LUM,PYGL,SCG3
RGS4	enzyme		1.342	0.00405	ID4,KDR,PAX6,PYGL,SPP1
SOX10	transcription regulator		1.342	1.59e-05	ACKR3,CDH2,CHRNA3,FOS,L1CAM,PLP1
CLIC4	ion channel		1.342	0.000264	RLBP1,SLC16A3,TRPM3,VEGFA,VIM
TIMP3	other		1.342	0.00022	BAMBI,FOS,JUN,SMAD2,VIM	153 (20)
mir-155	microRNA		1.338	8.31e-08	CCND1,CDH2,DNAJB1,GAPDH,GPI,HIF1A,ISYNA1,MYB,PKM,RHEB,SMAD2,VIM	141 (24)
THBS2	other		1.328	1.22e-05	HES1,HIF1A,LDHA,PKM
FOXO4	transcription regulator		1.309	3.84e-05	BNIP3,CCND1,CCNG2,FABP5,GADD45A,HIF1A,SOX9,VEGFA	138 (19)
NR3C1	ligand-dependent nuclear receptor		1.306	3.08e-07	ARRB2,B2M,CCN1,CCND1,CDKN1C,DBI,DDIT4,DUSP1,EGR1,FOS,GADD45A,GAS1,HIF1A,IER2,JUN,MSRB1,NHLH1,PFKFB3,PIK3R1,PPP1R14C,PYGL,SELENOP,SOX4,SPP1,TLE3,VIM	170 (20)
DGCR8	enzyme		1.298	1.39e-06	CCND1,EGR1,FOS,HES1,ID4,PLP1,SOX2	132 (20)
RBL1	transcription regulator		1.285	0.00968	CCND1,E2F1,FOS,HES1	154 (24)
SPI1	transcription regulator		1.282	0.000129	BCL7A,CCND1,CDK6,E2F1,FOS,HES1,ID3,IFITM3,JUN,MYB,SPP1,VIM	130 (18)
GABBR1	G-protein coupled receptor		1.279	4.52e-05	CDH2,COL2A1,SPP1,VIM	23 (3)
CYP1B1	enzyme		1.238	5.19e-05	APLP1,CCND1,GATM,IGFBP2,MCAM,PTPRF,RGS16,VAX2
MTORC1	complex		1.231	3.08e-05	CCND1,HIF1A,LDHA,PFKP,PKM,PLP1	126 (20)
GATA4	transcription regulator		1.223	1.44e-06	ASCL1,CCK,FOS,GAS1,GPI,HES1,ID1,JUN,LDHA,OTX2,PFKP,SOX9,SPP1,VIM
NOX4	enzyme		1.216	0.00293	HIF1A,LDHA,VEGFA,VIM	140 (22)
METTL3	enzyme		1.203	6.37e-06	CD9,CDH2,JUN,LDHA,MYBL1,NR4A1,PTP4A3,VIM,ZNF385A	68 (5)
SFTPA1	transporter		1.195	2.35e-05	ARRB2,CCN1,EGR1,FOS,FOSB,MAP1B,SFRP2	132 (18)
EGR1	transcription regulator		1.195	2.96e-08	CCND1,COL2A1,EGR1,FTL,GADD45A,HIF1A,ID1,JUN,JUNB,MYB,MYBL1,NR4A1,SPP1,VEGFA	155 (20)
AMBRA1	other		1.192	0.00164	CCND1,CDH2,LOXL1,VIM	56 (7)
FOXO3	transcription regulator		1.181	3.46e-09	BNIP3,CCN1,CCND1,CCNG2,CDKN1C,DDIT4,EGR1,FABP5,FOS,FOSB,GADD45A,HIF1A,ID1,JUNB,MCAM,PTTG1,SOX2,SOX9,VEGFA,VIM	161 (22)
EOMES	transcription regulator		1.172	0.00825	CCK,CRYM,KDR,NHLH1,SOX2
KDM4B	enzyme		1.172	5.05e-06	ENO1,GAPDH,LDHA,PKM,VIM	99 (7)
CEBPD	transcription regulator		1.156	0.00687	CCND1,CDKN1C,FBXW7,FOS,HIF1A	102 (10)
CTBP1	enzyme		1.154	0.000242	ACKR3,CCNG2,FOS,FSCN1,SPRY2
YY1	transcription regulator		1.147	6.96e-08	CDKN1C,DDIT4,EGR1,FOS,GADD45G,H4C3,HIF1A,ID3,ID4,KDR,NNAT,PLP1,REST,SLC1A3,TNNI1,VEGFA,VIM	156 (24)
ADORA2A	G-protein coupled receptor		1.144	3.46e-07	ATP1A3,CKB,DUSP1,FOS,GAPDH,GPI,HIF1A,IFITM3,NR4A1,RAB3A,VEGFA	108 (21)
HOXA10	transcription regulator		1.134	0.00382	FZD5,ID1,MAP1B,NR4A1,PIK3R1,RBP1,SAT1
miR-3082-3p (and other miRNAs w/seed ACAUGGC)	mature microRNA		1.134	0.0124	ADAMTS6,CCND1,DBI,GAPDH,GAS1,NREP,TF
miR-140-3p (and other miRNAs w/seed ACCACAG)	mature microRNA		1.134	0.0254	BTBD17,CDK6,FNDC5,MOB3B,MYB,PTTG1,WIF1
miR-7154-3p (miRNAs w/seed GGAGGAC)	mature microRNA		1.134	0.0136	FOSB,HES4,NHLH1,RAX,SLC1A3,VSX2,ZNF385A
Nkx2-2os	other		1.131	1.65e-05	CCND1,NNAT,PAX6,PCSK1N
CA9	enzyme		1.131	0.000533	COL2A1,ENO1,LDHA,PGK1
FOSL1	transcription regulator		1.117	6.88e-07	CCN1,CCND1,EGR1,FOS,FOSB,JUN,JUNB,MAP1B,TF	120 (15)
GAPDH	enzyme		1.114	0.00107	DUSP1,ENO1,GAPDH,SPP1
NDRG1	kinase		1.113	1.21e-06	CCND1,CDH2,FOS,JUN,PARP1,SMAD2,VEGFA,VIM	149 (23)
IKZF1	transcription regulator		1.113	0.0307	B2M,CDK6,DNM1,HES1,MGLL,PYGL,SOX9
SPDEF	transcription regulator		1.109	0.00131	CDH2,HIF1A,PTPRF,SMAD2,VIM	72 (7)
ASCL1	transcription regulator		1.109	9.64e-06	CCNG2,E2F1,GADD45G,ID1,ID3,PLXNA2,SOX2,SOX9	73 (7)
miR-669c-3p (and other miRNAs w/seed ACACACA)	mature microRNA		1.109	0.0132	CCNG2,CREB5,DNAJB1,E2F1,EPHA4,FZD5,H4C3,MCAM,PCLAF,PPP1R14C,PRSS23,PTTG1,SAT1,SLCO5A1,TFAP2C,TRPM3,VAX2,VEGFA
SMARCB1	transcription regulator		1.109	7.87e-07	ASCL1,BNIP3,CCND1,CDKN1C,DACH1,E2F1,FOS,HES1,IGFBP2,OTX2,PAX6,PTMS,SOX9	145 (14)
RPTOR	other		1.095	2.92e-05	CCND1,CDK6,ENO1,GPI,HIF1A,JUN,LDHA,PKM,TPI1	139 (17)
NQO1	enzyme		1.091	0.00274	CCND1,ENO1,LDHA,PKM	103 (12)
TAF7L	transcription regulator		1.091	0.00192	CAMK4,CELF3,FSCN1,H4C3
TFE3	transcription regulator		1.091	0.00427	CKB,ENO1,LDHA,VEGFA	109 (12)
SSTR2	G-protein coupled receptor		1.081	4.04e-09	CCN1,CDH2,CDK6,FOS,GADD45A,JUN,PYGL,RGS16,SAT1,SOX9,VEGFA,VIM	116 (13)
CREM	transcription regulator		1.076	1.41e-06	CAMK4,CCND1,DUSP1,EGR1,FOS,INA,JUNB,MIDN,NR4A1,PGK1,VEGFA	123 (21)
PDLIM2	other		1.067	0.0189	CCND1,PCSK1N,PPP1R14A,STC2
DDX25	enzyme		1.067	0.0371	APLP1,FABP5,FXYD1,TLE3
PLAG1	transcription regulator		1.067	0.00378	CDKN1C,EGR1,PTP4A3,VEGFA
SPARC	other		1.067	0.0478	HES1,SOX9,TBX3,VIM
PTPN6	phosphatase		1.067	0.00695	CCND1,CDH2,CDK6,VIM	159 (22)
KDM1A	enzyme		1.062	8.07e-07	BCL7A,CD9,CHD4,CRYM,HIF1A,IFITM3,IGFBP2,ONECUT2,PTTG1,RARRES2,RCOR2,S100A6,SELENOP,SFRP2,SOX2,ST18,VIM
IL18	cytokine		1.06	0.00158	BSG,DDIT4,GADD45G,JUN,SMAD2,SPP1,TF,VEGFA	130 (24)
PRKN	enzyme		1.06	0.000613	CCND1,CDK6,GAS1,IGFBP2,KDR,MIF	51 (7)
COL18A1	other		1.053	3.25e-09	CCND1,DDIT4,FOS,HIF1A,ID1,ID3,JUN,JUNB,KDR,LDHA,VEGFA	120 (21)
miR-141-3p (and other miRNAs w/seed AACACUG)	mature microRNA		1.031	9.26e-05	CDH2,CDK6,CYB5A,DACH1,DEK,GADD45A,RHEB,SLC6A9,SOX2,VIM,ZNF385D	88 (7)
NFATC2	transcription regulator		1.026	0.000484	CDH2,COL2A1,JUN,KDM6B,LDHA,NR4A1,SLCO3A1,TLE4,TSC22D1	56 (8)
CD40	transmembrane receptor		1.006	0.000863	CCND1,CDK6,DUSP1,ENO1,FOS,GAPDH,GPI,JUN,LDHA,TPI1,VEGFA	160 (23)
PKNOX2	transcription regulator		1	5.6e-05	COL2A1,EGR1,GADD45A,VIM
LINC01139	other		1	2.64e-06	EGR1,LDHA,PKM,SLC16A3	109 (12)
SAV1	other		1	0.000119	CCND1,SOX4,SPP1,VIM	97 (7)
TOR1AIP1	other		1	0.00107	FNDC5,GADD45G,HES6,PCLAF
ARID2	transcription regulator		1	0.00239	FOS,NREP,SMAD2,SPRY2
Cdk	group		1	0.000423	DDIT4,DUSP1,GADD45A,GADD45G	107 (7)
STAR	transporter		1	0.00506	ATP1A3,IFITM3,PIK3R1,SPP1
RAP1GAP	other		1	4.52e-07	CCND1,CDH2,CDK6,FOS	123 (23)
miR-381-3p (and other miRNAs w/seed AUACAAG)	mature microRNA		1	0.0247	BNIP3,CCDC34,CDK6,DEK
miR-684 (miRNAs w/seed GUUUUCC)	mature microRNA		1	0.0136	LHX2,SOX2,TFAP2B,VIM
miR-1946a (miRNAs w/seed GCCGGGC)	mature microRNA		1	0.0412	PCLAF,RAX,SCRT1,SOX8
NKX2-1	transcription regulator		1	0.0043	MTUS1,MYB,PLP1,PRDM13,SOX2,TMEM37,VEGFA
ASXL2	other		1	0.000254	FAM162A,PGK1,RARRES2,VEGFA
SAFB2	other		1	0.000119	B2M,FOS,JUN,L1CAM	53 (7)
PAX5	transcription regulator		1	0.00695	CCND1,PTPRF,PYGL,VIM	74 (7)
CD200R1	transmembrane receptor		1	0.00535	EGR1,HIF1A,JUN,JUNB	123 (20)
miR-6833-5p (miRNAs w/seed UGUGGAA)	mature microRNA		1	0.00256	B2M,CLIC1,TMEM37,TMSB10/TMSB4X
miR-6732-3p (miRNAs w/seed AACCCUG)	mature microRNA		1	0.00844	BAMBI,DDHD1,SPP1,TNNI1
SAFB	other		1	0.00293	B2M,FOS,JUN,L1CAM	137 (17)
EHMT1	transcription regulator		1	0.0371	CDKN1C,CYB5A,MSRB1,SAT1
POU2F2	transcription regulator		1	0.00405	ENO1,GATM,JUN,PFKFB3,SPP1
SCD	enzyme		0.977	0.000223	EGR1,FABP5,FOS,GADD45A,IGFBP2,JUN,MGLL,RBP1,SPP1	134 (19)
Interferon alpha	group		0.975	0.00178	B2M,CCND1,DDIT4,E2F1,FOS,IFITM3,LOXL1,MARCKSL1,PPP1R14B,S100A6,SAT1,SPRY2,STC2,TSC22D1,VIM	143 (21)
miR-101-3p (and other miRNAs w/seed ACAGUAC)	mature microRNA		0.97	0.0496	DDIT4,DUSP1,FOS,RNF180,SOX9,VASH2
TRAP1	enzyme		0.956	9.64e-06	E2F1,GAPDH,HIF1A,L1CAM,LDHA,PKM,SOX2,VEGFA	73 (7)
NFAT5	transcription regulator		0.956	0.00749	CD24,DDIT4,PFKP,PRSS35,SPP1,VEGFA
IL4	cytokine		0.955	2.08e-09	ATP1A3,BNIP3,CCND1,CDK6,CHD4,CKB,CYB5A,DDHD1,DDIT4,DYNC1H1,FAM162A,FOS,FOSB,FSCN1,GADD45G,GATB,GATM,GPM6B,HIF1A,HILPDA,ID3,IER2,IFITM3,JUN,JUNB,KDM6B,LDHA,PFKP,PGK1,PIK3R1,PKM,SLC16A3,SOX2,SPP1,STC2,TPI1,VEGFA,VIM,VIPR2,ZNF608	146 (21)
MEN1	transcription regulator		0.942	4.15e-05	CCND1,FOS,GAS1,HIF1A,IGFBP2,VIM	145 (21)
PINK1	kinase		0.927	6.12e-06	BNIP3,CCND1,HIF1A,VEGFA	140 (21)
CEBPA	transcription regulator		0.92	0.000168	ASCL1,CCND1,E2F1,FOS,GADD45A,GAL,GAPDH,GAS1,ID1,JUN,JUNB,OTX2,PPP1R14A,RARRES2,SPP1	158 (24)
Tcf7	transcription regulator		0.905	9.91e-05	ADAMTS6,FOSB,HES1,HIF1A,ID3,IFITM3,MCAM,MGLL,NNAT,PARP1,PCSK1N,PYGL,TSC22D1
KAT2B	transcription regulator		0.901	1.73e-07	B2M,E2F1,FOSB,HIF1A,LDHA,PFKFB3,PGK1,PKM	127 (17)
MSTN	growth factor		0.896	0.000138	FOS,H4C3,HIF1A,SPP1,VEGFA,VIM	134 (23)
COPS5	transcription regulator		0.896	0.0472	DDIT4,E2F1,FAM162A,HIF1A,SAT1,ZFP36L1
HBEGF	growth factor		0.896	3.32e-06	CCND1,EGR1,LDHA,PKM,REST,SLC16A3,VEGFA	140 (25)
MAPK9	kinase		0.892	5.74e-07	EGR1,FOS,GADD45A,GAPDH,HIF1A,HMGN2,IER2,IGFBP2,JUN,JUNB,MARCKSL1,MIF	156 (20)
mir-145	microRNA		0.881	0.00206	CDH2,CDK6,FSCN1,SOX9
miR-223-3p (miRNAs w/seed GUCAGUU)	mature microRNA		0.863	0.0053	CCND1,CYB5A,DDIT4,ETFB,FBXW7,GPM6B,TUBA1B,VIM	105 (7)
SLC15A4	transporter		0.853	1.65e-05	FOS,LOXL1,MARCKSL1,PPP1R14B,S100A6,SAT1,STC2,TSC22D1,VIM	98 (7)
POU5F1	transcription regulator		0.848	3.46e-13	ACKR3,ASCL1,BNIP3,CCND1,CDH2,DUSP1,ENO1,GADD45A,GADD45G,GPI,HIF1A,ID3,LDHA,LHX2,LOXL1,MIAT,PARP1,PAX6,PFKP,REST,SOX2,SPP1,TBX3,TF,VEGFA,VIM	133 (19)
SHC1	other		0.832	0.00805	CDH2,EGR1,FOS,FTL	121 (22)
IGF2	growth factor		0.831	6.59e-13	CCND1,CCNG2,DUSP1,EGR1,FABP7,GADD45A,GAS1,HIF1A,IER2,IGFBP2,JUNB,PIK3R1,RGS16,SAT1,SELENOP,SEZ6L2,SPP1,VEGFA	133 (22)
IGFBP2	other		0.823	0.000373	ARRB2,CCND1,CD24,EPHA4,IGFBP2
SOX11	transcription regulator		0.822	0.000167	BCL7A,CCND1,CD24,CD9,EGR1,HILPDA,IER2,NREP
HMG20A	transcription regulator		0.816	0.00131	CCN1,CD9,GADD45A,JUN,RGS16,VEGFA
IRF4	transcription regulator		0.816	0.00164	B2M,BNIP3,CDK6,DBI,PTMA,SPP1,TMSB10/TMSB4X,ZFP36L1
miR-3093-5p (miRNAs w/seed GCACCCC)	mature microRNA		0.816	0.0284	FOSB,GPM6B,HES6,NNAT,SOX2,VSX2
miR-4279 (miRNAs w/seed UCUCCUC)	mature microRNA		0.816	0.0208	CAMK4,FOS,FOSB,MAP1B,RAX,SOX4
miR-627-3p (miRNAs w/seed CUUUUCU)	mature microRNA		0.816	0.00259	ASCL1,CDK6,FBXW7,HILPDA,MAP1B,ONECUT2
miR-6748-3p (miRNAs w/seed CCUGUCC)	mature microRNA		0.816	0.0237	BAMBI,EGR1,FABP5,HMGN2,PFKFB3,STC2
IKBKE	kinase		0.816	0.000489	CCND1,LDHA,PGK1,PYGL,SLC16A3,TPI1	102 (7)
PI3K (family)	group		0.81	0.000229	CCNG2,DDIT4,FOS,HIF1A,PKM,SOX4,VEGFA	150 (21)
CDKN2A	transcription regulator		0.801	1.17e-05	CCND1,DEK,DUSP1,E2F1,EGR1,FAM111A,FOS,GADD45G,ID1,JUN,S100A6,SOX2,VEGFA,VIM,ZNF385A	138 (19)
mir-17	microRNA		0.789	0.000613	CCND1,E2F1,FBXW7,PTF1A,SMAD2,VIM	159 (19)
MYC	transcription regulator		0.787	1.47e-19	ASCL1,ATP6V0B,BZW2,CCND1,CCNG2,CD9,CDH2,CDK6,COL2A1,DBI,DDIT4,DEK,DUSP1,E2F1,EGR1,ENO1,FABP5,FOS,FXYD1,GADD45A,GADD45G,GAPDH,GAS1,GPI,HES1,HIF1A,HSPB1,ID1,ID3,JUN,KDR,LDHA,LUM,MIF,MYO10,OTX2,PARP1,PFKFB3,PFKP,PGK1,PKM,PLP1,PTMA,PTP4A3,RBP1,S100A6,SAT1,SLC16A3,SOX2,SOX9,SPP1,TF,TLE4,TMSB10/TMSB4X,TPI1,VEGFA,VIM,ZFP36L1	145 (22)
MYOD1	transcription regulator		0.766	0.00179	CDKN1C,DUSP1,FNDC5,GADD45A,GADD45G,HES6,JUNB,PCLAF,TNNI1	112 (12)
PTCH1	transmembrane receptor		0.762	4.62e-05	CCND1,COL2A1,GADD45A,LHX2,SOX9	131 (14)
APC	enzyme		0.762	8.61e-09	B2M,CCK,CCND1,CDH2,CDK6,HES1,HIF1A,ID1,ID3,JUN,SOX9,SPP1,TBX3,VEGFA	150 (22)
EPAS1	transcription regulator		0.75	4.78e-10	BNIP3,CCN1,CCND1,CKB,ENO1,FOS,HIF1A,HILPDA,KDR,L1CAM,LDHA,MIF,PFKFB3,SOX2,SOX9,STC2,TNNI1,VEGFA	142 (23)
CDKN1C	other		0.747	2.64e-06	CCND1,CDKN1C,E2F1,PARP1	97 (7)
NRAS	enzyme		0.728	2.57e-05	B2M,CCND1,CXXC5,EGR1,ETV5,HIF1A,HOMER3,KDR,PTP4A3,SPRY2,VEGFA	151 (24)
FADD	other		0.728	0.00266	CDK6,EGR1,FOS,JUN,JUNB	144 (23)
PPARA	ligand-dependent nuclear receptor		0.721	0.0152	CCND1,DBI,FABP5,FOS,HIF1A,HILPDA,IFITM3,IGFBP2,MGLL,SAT1,VEGFA
CDKN1A	kinase		0.688	8.31e-05	CCN1,CCND1,CD24,DUSP1,E2F1,GADD45A,HIF1A,IFITM3,PCLAF,PRSS23,SOX9,VEGFA,VIM	134 (16)
SMAD4	transcription regulator		0.681	2.39e-07	CCND1,CCNG2,CDH2,CDK6,COL2A1,FOS,FSCN1,GADD45A,ID1,PAX6,PKM,SMAD2,SOX2,TBX3,VEGFA,VIM	142 (21)
KLF5	transcription regulator		0.679	2.47e-06	CCND1,CDH2,DUSP1,HIF1A,ID3,JUN,SOX2,SOX4,ZFP36L1	162 (26)
RARA	ligand-dependent nuclear receptor		0.676	2.34e-08	CCND1,CD24,CD9,DUSP1,E2F1,EGR1,FOS,H4C3,JUN,KIRREL2,MAP1B,ONECUT2,OTX2,PLXNA2,PTTG1,RBP1,SOX2,SPP1,TLE4	128 (19)
miR-16-5p (and other miRNAs w/seed AGCAGCA)	mature microRNA		0.659	0.00883	CCND1,CDK6,FBXW7,GADD45G,JUN,MLLT11,MOB3B,MYB,MYBL1,RUNX1T1,SLC16A3,SMIM20,TLCD3B,TLE4,TPI1,VEGFA
IKBKB	kinase		0.65	0.000618	CCND1,EGR1,FOS,FSCN1,GADD45A,HIF1A,IGFBP2,JUNB,RBP1,RGS16,VEGFA	147 (18)
NFKBIA	transcription regulator		0.643	3.49e-08	ACKR3,BNIP3,CCND1,COL2A1,FOS,FSCN1,GADD45A,GADD45G,HES1,HIF1A,ID1,ID3,JUN,JUNB,NR4A1,PIK3R1,RBP1,RGS16,SAT1,SOX9,VEGFA	135 (19)
LCN2	transporter		0.64	0.00387	CDH2,HIF1A,MIF,SPP1,VIM	144 (21)
miR-144-3p (miRNAs w/seed ACAGUAU)	mature microRNA		0.64	0.0273	CCNG2,FABP5,HIF1A,ID4,JUN,MYBL1
NLRP3	enzyme		0.64	0.00567	HIF1A,IFITM3,KIF1A,PARP1,PTTG1,VIM	112 (10)
PRKAA1	kinase		0.64	0.0143	ACKR3,CD24,LDHA,TTYH1,VEGFA,ZFP36L1
PRKAA2	kinase		0.6	0.00087	CAMK4,E2F1,EGR1,LDHA,TTYH1,VIM,ZFP36L1	112 (12)
BPIFB1	other		0.594	0.000164	CCND1,CDH2,JUN,VEGFA	152 (19)
PRKCA	kinase		0.581	9.1e-05	CCND1,EGR1,FOS,HES1,ID1,ID3,JUN,VEGFA	132 (19)
TAFAZZIN	enzyme		0.566	8.13e-07	BASP1,BCL7A,CCN1,CCND1,CDH2,CDK6,DUSP1,HIF1A,LDHA,LUM,PIK3R1,PKM,PRSS23,TPI1,VEGFA	136 (15)
PGR	ligand-dependent nuclear receptor		0.564	6.55e-06	CCND1,CDH2,CDKN1C,FOS,GAL,GPM6B,HES1,HIF1A,ID1,LOXL1,MYO10,PFKFB3,PFKP,S100A6,SELENOP,SPRY2,STMN2,STMN4	171 (24)
EIF2AK4	kinase		0.562	0.000289	DDIT4,EGR1,PARP1,PLP1,PYGL
ADORA2B	G-protein coupled receptor		0.557	1.25e-05	CCND1,HIF1A,LDHA,SOX2,SPP1,VEGFA	139 (21)
GATA2-AS1	other		0.555	3.5e-05	BNIP3,HIF1A,KDR,LDHA,PGK1
GJA1	transporter		0.555	6e-05	CCND1,CDH2,SPP1,VEGFA,VIM	128 (22)
ID2	transcription regulator		0.552	1.18e-06	CCND1,CCNG2,DUSP1,GADD45G,HIF1A,ID3,MCAM,MYB,NR4A1,PIK3R1,SOX4,SOX9,TF	83 (10)
DUSP1	phosphatase		0.547	0.00135	DUSP1,IFITM3,JUN,LUM,MGLL,PARP1,PIK3R1	139 (16)
IgG	complex		0.544	0.000399	B2M,CD9,DUSP1,EGR1,FABP5,FOSB,HIF1A,HSPB1,IER2,IFITM3,JUNB,VEGFA	129 (19)
miR-29b-3p (and other miRNAs w/seed AGCACCA)	mature microRNA		0.54	0.00018	CCND1,CDH2,CDK6,COL2A1,ID1,MLLT11,NREP,PIK3R1,PLP1,PTP4A3,STMN2,TFAP2C,TLCD3B,VEGFA,ZFP36L1	104 (7)
CDKN1B	other		0.533	0.00049	B2M,CCND1,EGR1,LGR4,RAB3A,SELENOP,SOX2	137 (22)
SYK	kinase		0.528	0.0371	CCND1,GADD45A,TSC22D1,VEGFA
OGT	enzyme		0.522	3.84e-05	CCND1,ETFB,FOS,IGFBP2,JUN,RGS16,VIM,WIF1	136 (18)
KDM5B	transcription regulator		0.509	7.63e-10	CCND1,CYB5A,E2F1,EGR1,FABP5,GADD45A,GAL,IGFBP2,LIMCH1,MCAM,MYB,SAT1,SOX4,SOX9	99 (7)
PPARG	ligand-dependent nuclear receptor		0.505	1.59e-05	CCND1,CDK6,CRAT,FABP5,GAPDH,HES1,JUN,MGLL,NR4A1,PFKFB3,PTPRF,PYGL,RARRES2,SAT1,SPP1,TLCD3B,VEGFA,VIM	129 (18)
CEBPB	transcription regulator		0.477	0.000151	CCND1,CYB5A,DEK,E2F1,FOS,FTL,GADD45A,GAS1,ID1,IFITM3,JPT1,JUN,PPP1R14A,SAT1,SMAD2,SPP1,TF,VIM	134 (21)
miR-17-5p (and other miRNAs w/seed AAAGUGC)	mature microRNA		0.475	2e-06	BAMBI,CCN1,CCND1,CCNG2,CDK6,DDHD1,E2F1,EPHA4,HIF1A,JPT1,PFKP,SLC1A3,VASH2,VEGFA,VIM	140 (15)
IKBKG	kinase		0.468	0.0186	FOS,HIF1A,JUNB,RGS16,VEGFA
IL33	cytokine		0.466	0.000842	BNIP3,CCND1,FAM162A,FTL,HIF1A,HILPDA,JUNB,MIF,NR4A1,PGK1,SOX2,TPI1,VEGFA	160 (24)
NEDD9	other		0.453	5.48e-06	BNIP3,DDIT4,DUSP26,FOS,PFKP,PGK1,TF,VIM	113 (15)
BCL2	transporter		0.449	2.83e-08	BNIP3,CCND1,COL2A1,FOS,GADD45A,HIF1A,MCAM,NNAT,SCG3,SOX9,VEGFA	145 (18)
RNF187	enzyme		0.447	0.000246	ASCL1,CCND1,ID1,JUN,PCBP4,ZFP36L1	99 (7)
TCF7L1	transcription regulator		0.447	0.000593	JUN,NNAT,PCSK1N,STMN2,TBX3
ISL1	transcription regulator		0.447	0.00441	ETV5,GAL,LHX2,NEUROD4,PAX6
ADAM10	peptidase		0.447	4.61e-07	CCND1,CDH2,ENO1,FABP7,FOS,GADD45G,NR2E1,PAX6,PLP1,PODXL2,SOX9	121 (21)
TERT	enzyme		0.447	2.07e-06	B2M,BNIP3,CCND1,CD24,CDH2,IFITM3,PARP1,PAX6,PRSS23,SPP1,TBX3,VIM	153 (21)
miR-409-5p (and other miRNAs w/seed GGUUACC)	mature microRNA		0.447	0.0273	CRYM,HES6,NR2E1,RARRES2,VASH2
miR-542-5p (and other miRNAs w/seed UCGGGGA)	mature microRNA		0.447	0.0202	GAS1,RAB3A,RLBP1,SCRT1,TLE5
miR-519a-2-5p (and other miRNAs w/seed CUCUACA)	mature microRNA		0.447	0.000343	ARRB2,HES1,SELENOP,SLCO5A1,SPP1
CBX5	transcription regulator		0.447	0.0131	CD24,E2F1,PODXL2,PRSS23,TLE4
HOXA9	transcription regulator		0.447	4.92e-06	BCL7A,FZD5,HMGN2,IER2,JUN,JUNB,MYB,SOX4,SPP1,TSC22D1,VIM
EHF	transcription regulator		0.447	0.00387	COL2A1,E2F1,KDR,VEGFA,ZFP36L1	97 (7)
PDX1	transcription regulator		0.447	2.33e-07	CCND1,CKB,EGR1,ID1,ID3,JUN,JUNB,NNAT,PAX6,PRSS23,PTPRF,SPP1,ST18	142 (18)
NR1H4	ligand-dependent nuclear receptor		0.443	0.0148	CCN1,FABP5,FABP7,LDHA,RARRES2,SPP1,TPI1
PIK3R1	kinase		0.436	4.74e-05	CCND1,FOS,HIF1A,LDHA,PIK3R1,PKM,VEGFA	155 (23)
CD44	other		0.434	1.16e-08	ACKR3,CCND1,ENO1,GADD45A,JUN,PFKFB3,PFKP,PGK1,PKM,PTP4A3,SFRP2,SOX2,SPP1,VAX2,VEGFA,VIM	151 (21)
mir-338	microRNA		0.412	3.39e-08	CCND1,CDH2,HIF1A,SOX4,VIM	79 (7)
SMAD7	transcription regulator		0.408	4.93e-05	BZW2,CDH2,COL2A1,GADD45A,ID1,ID3,SOX2,SOX9,VEGFA	139 (20)
KLF4	transcription regulator		0.4	3.03e-08	ASCL1,CCND1,CDKN1C,DUSP1,E2F1,GADD45A,HES1,HSPB1,ID3,IFITM3,KDR,OTX2,PFKP,SOX2,TBX3,TF,VEGFA,VIM	147 (21)
WNT5A	cytokine		0.396	7.19e-05	CAMK4,CCK,CCND1,CDK6,COL2A1,EPHA4,FZD5,ID3,SPP1,VEGFA,VIM	144 (20)
NOG	growth factor		0.391	2.77e-05	CXXC5,ID3,ID4,KDR,SPP1,VEGFA	102 (20)
CCN5	growth factor		0.391	0.000264	CCND1,CD24,HIF1A,JUN,VIM	123 (21)
HYAL1	enzyme		0.378	1.39e-06	AP1S2,DACH1,MAP1B,RUNX1T1,SOX9,SPP1,TBX3
DSCAM	other		0.378	7.73e-05	ETV5,GADD45G,ID3,L1CAM,LHX2,NREP,VIM
ERBB4	kinase		0.378	5.47e-05	CCND1,DUSP1,EGR1,GADD45A,HIF1A,JUN,PGK1	142 (21)
SNCA	enzyme		0.378	1.78e-07	B2M,CABP1,CCK,CRYM,DNM1,DUSP1,DYNC1H1,FABP7,GADD45A,HES1,HIF1A,KIF1A,LHX2,MAP1B,PGK1,RAB3A,S100A6,SORCS1,TPI1	60 (4)
miR-6868-3p (miRNAs w/seed UCCUUCU)	mature microRNA		0.378	0.00482	GADD45A,MAP1B,OTX2,PLP1,QDPR,TFAP2B,ZNF385D
MYCN	transcription regulator		0.371	8.06e-05	B2M,BASP1,CCND1,CCNG2,E2F1,GAPDH,JUNB,LDHA,LRRN3,PTMA,TPI1,TUBA1B,VIM	117 (11)
RICTOR	other		0.368	0.00463	ATP6V0B,BSG,EGR1,FABP5,HIF1A,NDUFA4L2,PFKFB3,RGS16,VIM	152 (23)
SALL4	transcription regulator		0.342	0.00289	CCN1,CCND1,CDH2,ID3,JUN,SOX2,VIM	45 (5)
GATA6	transcription regulator		0.342	0.00221	ASCL1,GPI,HES1,OTX2,PGK1,PPP1R14A,SOX2,TBX3
miR-291a-3p (and other miRNAs w/seed AAGUGCU)	mature microRNA		0.333	0.000281	ATP6V0B,CCND1,CD24,DDHD1,E2F1,FOSB,JPT1,MYBL1,PHC2,VEGFA,VIM
miR-3918 (miRNAs w/seed CAGGGCC)	mature microRNA		0.333	0.0275	CLIC1,GATB,HES4,MCAM,MSRB1,NHLH1,TLCD3B,TNNI1,TUBA1B
miR-7110-3p (miRNAs w/seed CUCUCUC)	mature microRNA		0.302	0.000953	ASCL1,ATP1A3,CCND1,ELAVL3,FOSB,GAPDH,ID4,MAP1B,PFKFB3,RLBP1,RNF165
GRN	growth factor		0.287	1.03e-06	B2M,CCND1,CD9,COL2A1,EGR1,ETV5,FOS,HIF1A,PIK3R1,SPP1,TPI1,VEGFA	128 (24)
HOTAIR	other		0.283	0.00293	CDH2,HIF1A,MEG3,SOX2	74 (7)
ING1	transcription regulator		0.283	0.000533	DEK,SPP1,STMN4,TLE5
LEF1	transcription regulator		0.28	7.21e-06	ADAMTS6,ARRB2,CCND1,FOSB,HES1,IFITM3,MGLL,NNAT,PCSK1N,PYGL,SOX9,SPP1,TSC22D1,VIM	141 (20)
IL27	cytokine		0.277	0.023	B2M,EGR1,FOS,GADD45G,VIM
MFAP5	other		0.277	0.000289	CDH2,DUSP1,FAM131C,SPON2,SPP1
HTT	transcription regulator		0.277	2.8e-12	ATP1A3,B2M,BASP1,CAMK4,CCK,CCND1,CD9,DNAJB1,DNM1,EGR1,FABP7,FBXW7,FOS,GADD45G,GAPDH,GPI,HIF1A,JUN,JUNB,LDHA,MCAM,NR4A1,NREP,OTX2,PDLIM4,RGS16,SELENOP,SLC1A3,SPP1,TAGLN3,TFAP2C,TPI1,VIPR2	123 (19)
LDL	complex		0.267	2.96e-06	CCND1,DUSP1,EGR1,FOS,FOSB,HIF1A,ID1,IGFBP2,JUN,MIR124-1HG,NR4A1,PARP1,PTPRF,VEGFA	138 (21)
miR-92a-3p (and other miRNAs w/seed AUUGCAC)	mature microRNA		0.265	0.0391	CCND1,CDK6,CDKN1C,FBXW7,RNF180,SOX4,TBX3
miR-18a-5p (and other miRNAs w/seed AAGGUGC)	mature microRNA		0.256	0.0208	CCND1,E2F1,HIF1A,HMGN2,PTF1A,PTP4A3,SMAD2
PSMB11	peptidase		0.246	0.000385	CCND1,CREB5,GADD45A,L1CAM,NR4A1,RARRES2,THBS3
INSR	kinase		0.243	3.64e-11	CCND1,CCNG2,CRAT,DEK,DUSP1,EGR1,ETFB,FOS,GADD45A,GAPDH,GAS1,IER2,JUNB,MARCKSL1,NR4A1,OTX2,PAX6,REST,RGS16,SAT1,SCARB2,SELENOP,SEZ6L2,SFRP2,SOX2,TFAP2C,TNNI1,TSC22D1	122 (22)
PPARD	ligand-dependent nuclear receptor		0.24	1.19e-06	CCND1,EGR1,ENO1,FABP7,FAM131C,IGFBP2,LDHA,NR4A1,PKM,PLP1,RBP1,S100A6,SAT1,SCARB2,VEGFA	147 (24)
IRF3	transcription regulator		0.239	0.00798	B2M,CDH2,IFITM3,JUNB,PTMS,TFAP2C,VIM	146 (23)
FOS	transcription regulator		0.225	0.000692	CCND1,EGR1,ENO1,FOS,FOSB,FZD5,GAS1,JUN,JUNB,NR4A1,PTTG1,RBP1,SFRP2,SPP1,VEGFA,VIM	147 (19)
estrogen receptor	group		0.218	0.000509	CCND1,CD24,EGR1,FOS,GAL,JUN,MAP1B,SAT1,VEGFA,VIM	145 (23)
USF1	transcription regulator		0.218	5.87e-05	B2M,CCNG2,DUSP1,ENO1,LDHA,PGK1,SPP1	102 (7)
FGFR4	kinase		0.218	2.16e-05	CCND1,CDH2,FOS,FSCN1,KDR,RBP1,VIM	135 (22)
CD3E	transmembrane receptor		0.218	0.000107	BNIP3,E2F1,FOS,JUN,MYB,PIK3R1,SCARB2	137 (21)
miR-27a-3p (and other miRNAs w/seed UCACAGU)	mature microRNA		0.217	0.00383	FBXW7,FOSB,HILPDA,ID3,JUN,NREP,ONECUT2,SPRY2,STMN2,TMSB10/TMSB4X,ZNF385D,ZNF608
NFkB (complex)	complex		0.208	4.95e-08	ACKR3,BAMBI,CCK,CCN1,CCND1,COL2A1,EGR1,FABP5,FOS,GADD45A,HIF1A,HSPB1,IGFBP2,JUN,JUNB,KDM6B,KDR,MYBL1,RGS16,SFRP2,SLC16A3,SPP1,ST18,VEGFA,VIM	140 (18)
Stat3-Stat3	complex		0.2	0.000343	CCND1,FOS,FTL,HIF1A,VEGFA	123 (11)
ERBB3	kinase		0.186	4.49e-06	CCN1,CCND1,CCNG2,DUSP1,EGR1,ETV5,HIF1A,IER2,VEGFA	155 (26)
AMPK	complex		0.179	0.0101	EGR1,FSCN1,HIF1A,PFKFB3,VIM
mir-1	microRNA		0.174	0.000299	CCND1,PFKFB3,RHEB,SH3BGRL3,SOX9,VEGFA,ZFP36L1
CHUK	kinase		0.149	0.000122	ACKR3,CCND1,E2F1,FOS,HES6,JUNB,RBP1,RGS16,SPP1,VEGFA	152 (18)
KRAS	enzyme		0.148	9.67e-22	B2M,BNIP3,BSG,BZW2,CCN1,CCND1,CD24,CDH2,DUSP1,E2F1,EGR1,ENO1,ETV5,FABP5,FOS,FOSB,GADD45A,GAPDH,GAS1,GPM6B,HES1,HIF1A,HSPB1,ID1,IFITM3,IGFBP2,JUN,JUNB,L1CAM,LDHA,LUM,MCAM,NR4A1,PHC2,PKM,PTPRF,PTTG1,RARRES2,RBFOX3,REST,RUNX1T1,S100A6,SLC25A6,SOX2,SOX9,SPP1,SPRY2,TLE3,VEGFA,VIM,ZFP36L1	159 (23)
IGF1R	transmembrane receptor		0.147	0.000196	CCND1,EGR1,FOS,HIF1A,IGFBP2,NR4A1,PKM,SCARB2,SPP1,TNNI1,VEGFA,ZFP36L2	120 (21)
TGFB2	growth factor		0.142	6.83e-07	EGR1,FOS,GAS1,ID4,KDR,RUNX1T1,SMAD2,SPP1,VEGFA,VIM	163 (26)
IL17A	cytokine		0.136	1.73e-05	B2M,CCK,CCN1,CCND1,CDH2,COL2A1,FOS,GADD45A,JUN,RGS16,SMAD2,SPP1,VEGFA,VIM	147 (18)
PDPK1	kinase		0.132	0.00117	CCND1,LDHA,PFKP,SOX2	143 (22)
HLX	transcription regulator		0.132	0.000423	CDKN1C,EGR1,HES1,JUN
mir-25	microRNA		0.132	0.000979	E2F1,FBXW7,GADD45A,TBX3	99 (7)
TP63	transcription regulator		0.132	5.25e-15	CCN1,CCND1,CDH2,CDK6,CDKN1C,DDIT4,DNAJB1,E2F1,EGR1,FOS,FOSB,FSCN1,FZD5,GADD45A,GAL,GAPDH,HES1,ID1,ID3,IGFBP2,JUN,JUNB,L1CAM,MYB,PCBP4,PHC2,SELENOP,SMAD2,SOX2,SOX4,SOX9,STON2,VEGFA,VIM	137 (19)
NCOA1	transcription regulator		0.126	0.0014	CCND1,CD24,EGR1,FOS,HIF1A,JUNB,KDR	139 (21)
CYP19A1	enzyme		0.124	0.0288	CCND1,JUN,SOX9,VEGFA
PML	transcription regulator		0.124	0.00969	CCND1,CDH2,FTL,GADD45A,HSPB1,VIM	136 (17)
RXRA	ligand-dependent nuclear receptor		0.104	0.000197	CCND1,CDK6,FABP5,FOS,FTL,GADD45G,HIF1A,MAP1B,RBP1,RLBP1,S100A6,SAT1,SPP1,VEGFA	138 (21)
GATA3	transcription regulator		0.103	0.000437	ASCL1,CCND1,CDH2,FOS,FSCN1,HIF1A,MYO10,TBX3,VEGFA,VIM	138 (23)
mir-223	microRNA		0.094	0.00125	CCND1,CYB5A,E2F1,FBXW7,HIF1A,PARP1,S100A6
IRF1	transcription regulator		0.094	0.00859	B2M,CCND1,CDH2,E2F1,IFITM3,MYB,TBX3	120 (18)
NF-Y	complex		0.094	0.000263	B2M,E2F1,GADD45A,JUNB,MYBL1,PKM
AVP	other		0.094	0.00274	CCND1,EGR1,FOS,S100A6	116 (24)
HOXA5	transcription regulator		0.07	0.000121	CDH2,EGR1,IER2,SAT1,VIM
KDM2B	enzyme		0.068	0.000732	CD24,COL2A1,FOS,SFRP2	99 (7)
F10	peptidase		0.065	1.22e-05	CCN1,EGR1,MIF,VEGFA	100 (18)
TGFBR1	kinase		0.063	0.0101	CCND1,CDH2,GAS1,ID4,VIM
CSF1	cytokine		0.062	1.8e-08	CCND1,CD9,CDK6,DUSP1,EGR1,ENO1,FOS,GPI,HIF1A,JUN,JUNB,LDHA,LGR4,PFKFB3,PKM,SLC16A3,SPP1,TPI1,VEGFA	120 (22)
mir-122	microRNA		0.061	0.0203	MAP1B,PKM,SH3BGRL3,VIM
MMP9	peptidase		0.059	0.000299	CCND1,FOS,GADD45A,KIF1A,L1CAM,VEGFA,VIM	143 (21)
BCR (complex)	complex		0.046	7.76e-06	ATP6V0B,CCND1,CCNG2,CDK6,EGR1,ENO1,FOS,FOSB,GAPDH,GPI,JUNB,LDHA,TPI1,ZNF608	133 (26)
TXN	enzyme		0.038	0.00192	FOS,HIF1A,MIF,VEGFA	131 (23)
TWIST1	transcription regulator		0.029	2.76e-05	CCK,CDH2,COL2A1,DNM1,FOS,SOX2,SPP1,TF,VEGFA,VIM	129 (20)
PIM2	kinase		0.025	5.6e-05	CCND1,CDKN1C,E2F1,PKM	127 (18)
APLN	other		0.024	5.7e-07	CCND1,EGR1,FOS,FSCN1,KDR,MYB,PTP4A3,RBP1,VIM	115 (21)
SPRY2	other		0.017	0.000194	ETV5,FABP7,FOS,HIF1A,PFKFB3,PGK1,SPP1	153 (29)
MDM2	transcription regulator		0.006	0.00461	CCND1,E2F1,FBXW7,HIF1A,SPRY2	132 (22)
RND3	enzyme		0.005	2.48e-06	CCND1,HES1,HIF1A,VEGFA,VIM	114 (10)
EPCAM	other		0	5.02e-07	CCND1,EGR1,FABP5,FOS,ID1,JUN,SOX2	146 (23)
Ige	complex		0	0.00364	EGR1,ETV5,JUNB,MARCKSL1,MIF,PTPRF,RGS16,RNF180,SPP1,VIM	133 (21)
LATS2	kinase		0	0.000511	CCN1,CD24,E2F1,SOX9,SPP1	145 (18)
ADAM17	peptidase		0	1.97e-05	CCND1,CLIC1,GADD45G,HES1,HSPB1,SOX2,SOX9,SPP1,TF	145 (21)
miR-3605-3p (miRNAs w/seed CUCCGUG)	mature microRNA		0	0.0147	ASCL1,ELAVL3,LIMD2,TLE5
miR-412-5p (miRNAs w/seed GGUCGAC)	mature microRNA		0	0.0183	FOS,ID4,SCRT1,SLCO3A1
miR-1913 (miRNAs w/seed CUGCCCC)	mature microRNA		0	0.0314	DUSP1,ETV5,HES6,ID4,PCBP4,PTP4A3,TNNI1,TTYH1
miR-578 (and other miRNAs w/seed UUCUUGU)	mature microRNA		0	0.0478	CCDC88A,FAM162A,PLP1,SPP1
miR-1249-3p (and other miRNAs w/seed CGCCCUU)	mature microRNA		0	0.00259	ETV5,HSPB1,PHC2,RAX,SOX9,TNNI1
miR-5132-5p (miRNAs w/seed CGUGGGG)	mature microRNA		0	0.0224	GADD45A,LHX2,NDUFA4L2,VSX2
miR-2139 (miRNAs w/seed GCUGCGC)	mature microRNA		0	0.0271	ADAMTS6,CCN1,PODXL2,VASH2
miR-10394-3p (and other miRNAs w/seed GGGCGCG)	mature microRNA		0	0.0263	FXYD1,HES4,MIDN,TLCD3B
miR-3077-3p (and other miRNAs w/seed UGACUCC)	mature microRNA		0	0.0467	ELAVL3,OTX2,PLP1,TLCD3B
miR-3475-3p (and other miRNAs w/seed CUGGAGG)	mature microRNA		0	0.00583	CCDC85B,FOSB,HOMER3,ID1,MCAM,NOL4,NR4A1,SH3BGRL3
SS18	transcription regulator		0	4.62e-05	HES4,SLC16A3,SOX2,SOX8,TLE3
PIAS1	transcription regulator		0	0.00968	APBA2,CCND1,DNM1,GADD45A	144 (20)
PTGER4	G-protein coupled receptor		0	0.028	CCNG2,CDK6,EGR1,SPP1,ZFP36L1
PKNOX1	transcription regulator		0	1.13e-05	FABP7,HIF1A,KDR,PGK1,VEGFA
STIM1	ion channel		0	0.00011	CAMK4,CDK6,JUNB,KDR,MYBL1,VEGFA	103 (9)
DIRAS3	enzyme		0	2.17e-05	CCND1,COL2A1,FOSB,PARP1
CTSB	peptidase		0	0.000331	CCND1,E2F1,KDR,VEGFA	144 (20)
miR-6090 (miRNAs w/seed GGGAGCG)	mature microRNA		0	0.00968	LIMD2,MCAM,RAX,RBFOX3
miR-6508-5p (and other miRNAs w/seed CUAGAAA)	mature microRNA		0	0.0101	CDK6,CRYM,HOMER3,ONECUT2
miR-6396 (miRNAs w/seed GGGCCUU)	mature microRNA		0	0.0232	CRAT,PRSS35,SLC6A9,VSX2
miR-6079 (miRNAs w/seed UGGAAGC)	mature microRNA		0	0.0423	APCDD1L,ASCL1,HMGN2,RBFOX3
PAX2	transcription regulator		0	0.000423	PAX6,SFRP2,SOX8,VSX2
RARG	ligand-dependent nuclear receptor		0	0.000548	DUSP1,EGR1,FOS,JUN,OTX2,SOX2	145 (21)
ACVR1C	kinase		0	0.000375	CCND1,CCNG2,FOS,JUNB	154 (25)
ARNT2	transcription regulator		0	0.0252	EGR1,PDLIM4,PGK1,PLP1,VEGFA,ZFP36L1
ADGRE2	other		0	0.000661	CCND1,CXXC5,FOS,JUN	74 (7)
RHO	G-protein coupled receptor		0	0.00731	B2M,FOS,S100A6,SELENOP	78 (7)
miR-6760-3p (miRNAs w/seed CACUGUC)	mature microRNA		0	0.0255	ARRB2,QDPR,RLBP1,TMSB10/TMSB4X
miR-4433b-3p (miRNAs w/seed AGGAGUG)	mature microRNA		0	0.00137	MIDN,MLLT11,NHLH1,SFRP2,SPRY2,VIM
miR-7017-3p (miRNAs w/seed CCCUGCU)	mature microRNA		0	0.0217	H4C3,JUN,NDUFA4L2,PCLAF,SLC16A3,TSC22D1
miR-6753-5p (miRNAs w/seed ACCAGGG)	mature microRNA		0	0.0247	GAS1,HES6,PCLAF,TAGLN3,TLE5,ZNF385D
CPT1B	enzyme		0	0.0088	DBI,MGLL,PFKFB3,PIK3R1,PTPRF,PYGL,RHEB
HDAC1	transcription regulator		0	1.6e-07	BAMBI,CCND1,COL2A1,DUSP1,EGR1,FOS,HES1,ID1,INA,KDR,PFKFB3,REST,SOX11,SOX2,SOX9,SPP1	151 (23)
CGA	other		0	0.000935	CCND1,E2F1,ETV5,ID1,NNAT,SSR4	61 (7)
PAX1	transcription regulator		0	0.00151	ASCL1,COL2A1,OTX2,SOX9
Map3k7	kinase		0	0.000149	GAS1,ID4,JUN,RUNX1T1,SOX9,TSC22D1
IL13	cytokine		-0.024	0.0342	ACKR3,BZW2,EGR1,FAM162A,JUN,NHLH1,PFKP,SOX2,SPP1,VEGFA
KLF2	transcription regulator		-0.052	0.000215	ACKR3,CDH2,GADD45A,HIF1A,ID1,ID3,JUNB,KDR,SOX9	114 (10)
mir-24	microRNA		-0.06	0.00313	CDH2,KDR,PARP1,SPRY2	81 (7)
KL	enzyme		-0.068	0.000593	CCND1,EGR1,KDR,VEGFA,VIM	154 (21)
ERK1/2	group		-0.083	4.27e-12	ATP1A3,B2M,CCK,CCND1,COL2A1,DUSP1,E2F1,EGR1,ENO1,FOS,FOSB,ID1,ID3,JUN,JUNB,PKM,S100A6,SMAD2,SOX2,SOX9,SPP1,VEGFA	148 (19)
JUND	transcription regulator		-0.085	3.5e-05	CCND1,HIF1A,NR4A1,SAT1,SOX4,SPP1,VEGFA	122 (15)
WNT3A	cytokine		-0.088	3.85e-10	CAMK4,CCN1,CCND1,CDH2,COL2A1,DDIT4,ETV5,GADD45G,GAS1,ID1,JUN,KDR,RUNX1T1,SFRP2,SLC1A3,SOX4,SOX9,TBX3,VEGFA,VIM,WIF1	152 (19)
PRMT1	enzyme		-0.101	0.000889	CCND1,CDH2,FTL,LOXL1,MGLL,VIM	87 (9)
MACROH2A1	other		-0.113	2.95e-06	ASCL1,CDKN1C,EGR1,GADD45A,ID1,PARP1,SOX2,TBX3	97 (11)
CHROMR	other		-0.113	0.000254	CD9,DDIT4,HES4,IFITM3,JUNB,PFKFB3,SCARB2,TBX3
FAT1	other		-0.124	0.000164	CD24,JUN,SOX2,VIM	117 (12)
GLI1	transcription regulator		-0.124	4.88e-14	CADPS,CCN1,CCND1,CCNG2,CD24,CDK6,COL2A1,EGR1,ETV5,FOS,H4C3,HES1,ID1,ID3,MIDN,NREP,PTPRF,PTTG1,S100A6,SAT1,SELENOP,SLC1A3,SOX2,SOX4,SOX9,SPP1,TBX3,TSC22D1,VEGFA,VIM,WIF1	150 (21)
BAG1	other		-0.128	5.64e-06	CCND1,CDH2,FOS,GADD45A,JUN,VIM	142 (24)
miR-1893 (and other miRNAs w/seed GCGCGGG)	mature microRNA		-0.128	0.0222	HSPB1,JUN,KDM6B,MYO10,PODXL2,RAX
POU4F1	transcription regulator		-0.128	0.000205	CHRNA3,ETV5,GAL,INA,LHX2,NEUROD4,TFAP2B
TRIB3	kinase		-0.13	4.03e-05	DDIT4,HIF1A,ID1,LDHA,STC2	113 (10)
SNHG11	other		-0.132	1.22e-05	BSG,CDH2,ENO1,VIM	90 (7)
NRG1	growth factor		-0.14	2.04e-21	ASCL1,BNIP3,CCN1,CCND1,DUSP1,E2F1,EGR1,ETFB,ETV5,FABP5,FOS,FOSB,FSCN1,GPI,HES1,HIF1A,ID1,IER2,JUN,JUNB,L1CAM,MGLL,NR4A1,RAB3A,SOX2,SOX4,TF,VEGFA,VIM,ZFP36L2	141 (20)
CD40LG	cytokine		-0.14	1.83e-08	B2M,BNIP3,CCNG2,CDK6,DUSP1,EGR1,FOS,FOSB,FSCN1,GADD45A,GATB,HIF1A,ID3,JUN,JUNB,KDM6B,MARCKSL1,MIF,VEGFA,ZFP36L1	134 (21)
E2F1	transcription regulator		-0.144	8.36e-10	BNIP3,CCND1,CD9,CDH2,CDK6,CDKN1C,CKB,CLIC1,COL2A1,CYB5A,DUSP1,E2F1,EGR1,FOS,HES1,ID3,JPT1,KDR,MIF,MYB,PCLAF,PIK3R1,PTTG1,VEGFA,VIM	145 (20)
FOXO1	transcription regulator		-0.15	9.14e-08	ATP6V0B,BNIP3,CAMK4,CCND1,CCNG2,CDKN1C,COL2A1,DDIT4,EGR1,FABP5,FOS,FOSB,GADD45A,GPI,HIF1A,JUN,JUNB,SOX2,SOX4,SOX9,SPRY2	133 (22)
LRP6	transmembrane receptor		-0.152	0.000438	CCND1,FOS,SPP1,TTYH1,VIM	139 (23)
MST1	growth factor		-0.152	0.000164	CCND1,FOS,SOX4,SPP1	144 (25)
miR-383-5p (miRNAs w/seed AGAUCAG)	mature microRNA		-0.152	0.0402	GAS1,MLLT11,NNAT,OTX2
LAMA4	enzyme		-0.152	0.0333	CCND1,HIF1A,SPP1,VEGFA
DIO2	enzyme		-0.152	5.72e-05	DDIT4,EGR1,FOS,FOSB,GADD45G,LUM,MARCKSL1,NR4A1,SLC1A3
P38 MAPK	group		-0.153	2.16e-07	BNIP3,CCK,CCND1,CCNG2,DUSP1,EGR1,FOS,HIF1A,ID3,JUN,JUNB,MIF,NR4A1,RBP1,SMAD2,SPP1,TNNI1,VEGFA	123 (19)
STAT6	transcription regulator		-0.157	0.00602	DDHD1,EGR1,FSCN1,GADD45G,GATM,GPM6B,IER2,IFITM3,KDM6B,MYB,VIM,ZNF608	138 (15)
miR-34a-5p (and other miRNAs w/seed GGCAGUG)	mature microRNA		-0.157	0.00248	CCND1,CDK6,DPYSL4,E2F1,EPHA4,GAS1,INA,LDHA,LGR4,LIMD2,MARCKSL1,MYB,ONECUT2,RNF165,SETBP1,SLCO3A1,SOX2,TMEM37,VEGFA
PLCB1	enzyme		-0.161	1.22e-05	CD24,CDH2,GAPDH,VIM
MYD88	other		-0.181	2.04e-05	BAMBI,CCN1,DUSP1,EGR1,FOS,HIF1A,JUN,KDM6B,PARP1,SLC16A3,SLCO3A1,SOX9,SPP1,TSC22D1	136 (21)
SKP2	other		-0.192	6e-05	CCND1,CDH2,E2F1,PTMA,VIM	147 (19)
EIF2AK3	kinase		-0.194	0.0248	CCND1,EGR1,GADD45A,JUN,VEGFA
RARB	ligand-dependent nuclear receptor		-0.194	3.77e-06	ASCL1,EGR1,GADD45A,ID1,ID3,JUN,OTX2,SOX2,SPP1,SSR4,VEGFA	129 (19)
NFKB1	transcription regulator		-0.196	5.53e-08	B2M,BAMBI,CCN1,CCND1,COL2A1,CRMP1,DUSP1,E2F1,EGR1,FOS,FOSB,FSCN1,GADD45A,MYB,NR4A1,SOX9,VEGFA	155 (22)
IFNG	cytokine		-0.197	1.61e-06	ASCL1,B2M,CAMK4,CCND1,CDH2,CYB5A,DUSP1,E2F1,EGR1,ENO1,FABP5,FOS,FOSB,FTL,HES1,HIF1A,HSPB1,ID1,IER2,IFITM3,JUN,JUNB,KDR,LDHA,MARCKSL1,MIF,MYB,PAX6,PFKFB3,PKM,SELENOP,SLC16A3,SLC1A3,SPP1,ST18,TFAP2C,TPI1,VEGFA,VIM	151 (19)
CIP2A	other		-0.2	0.000787	GADD45A,LUM,PKM,SAT1,SLC16A3	107 (7)
mir-34	microRNA		-0.211	1.74e-05	CCND1,CDK6,E2F1,HIF1A,MYB,PFKFB3,PFKP,PKM	138 (15)
PKM	kinase		-0.212	6.47e-06	CCND1,CDH2,EGR1,ENO1,GAPDH,HIF1A,LDHA,PKM	123 (23)
Notch	group		-0.213	4.97e-06	CXXC5,DUSP1,GATM,HES1,ID1,ID3,PTPRF,SMAD2,SOX2,VEGFA	136 (22)
FASN	enzyme		-0.218	0.00695	CDH2,DDIT4,SFRP2,VIM
BACH1	transcription regulator		-0.218	0.000961	DUSP1,FTL,GAPDH,SLC25A6,SPP1
EGR2	transcription regulator		-0.235	1.65e-05	CAMK4,EGR1,EPHA4,FOS,ID3,ID4,JUN,KDR,MYB,SLC1A3,SOX2,TSC22D1,VEGFA	131 (18)
ID3	transcription regulator		-0.239	0.000327	CCNG2,DUSP1,GADD45G,HIF1A,ID3,MYB,NR4A1,PIK3R1,SOX4	74 (7)
HFE	transmembrane receptor		-0.239	6.54e-05	B2M,DUSP1,EGR1,GADD45G,HSPB1,RGS16,SMAD2,TF
NCOA3	transcription regulator		-0.252	1.61e-07	CCN1,CCND1,E2F1,HES1,KDR,LDHA,PGK1,SLC16A3,SOX2,VEGFA	151 (23)
ISLR	other		-0.254	0.000732	CCN1,FOS,PRSS23,SOX11
GTF2IRD1	transcription regulator		-0.254	0.000891	FOS,KDR,TNNI1,VSX2	65 (4)
BSG	transporter		-0.265	1.21e-06	BSG,CCND1,CDH2,HIF1A,KDR,VEGFA,VIM	132 (19)
mir-221	microRNA		-0.272	0.00107	CDKN1C,KDR,PIK3R1,SPP1
SFRP1	transmembrane receptor		-0.277	0.000315	CCND1,CD24,SOX9,TTYH1,VIM	72 (7)
miR-342-3p (miRNAs w/seed CUCACAC)	mature microRNA		-0.277	0.0391	E2F1,HIF1A,ID4,KDM6B,SEC61G
PLAUR	transmembrane receptor		-0.279	5.02e-07	CCND1,CDH2,E2F1,JUN,JUNB,KDR,VIM	121 (19)
HIC1	transcription regulator		-0.279	4.17e-06	ACKR3,CCND1,CDKN1C,ID4,MCAM,SOX9,SPP1	117 (13)
ITGB1	transmembrane receptor		-0.279	0.000423	CDH2,FOS,GAS1,JUN,JUNB,LOXL1,VEGFA,VIM	126 (23)
RASSF1	other		-0.282	5.86e-09	CCND1,CDH2,DACH1,EGR1,FOS,HES1,MAP1B,MTUS1,SELENOP,SOX9,SPP1	134 (23)
TNFRSF1A	transmembrane receptor		-0.283	0.0383	CDH2,E2F1,JUN,KDR,VEGFA
MUC3A	other		-0.283	8.95e-07	CCND1,CDK6,HIF1A,VEGFA	122 (10)
CSF3	cytokine		-0.294	0.0114	CDK6,EGR1,FOS,GADD45A,GADD45G,JUN,VEGFA
miR-3667-3p (miRNAs w/seed CCUUCCU)	mature microRNA		-0.302	7.46e-05	FXYD1,GADD45A,GADD45G,IGFBP2,KDR,LIMD2,MYBL1,QDPR,SMIM20,VASH2,ZNF385D
DNMT3A	enzyme		-0.302	2.18e-06	BSG,E2F1,ETV5,JUN,KDM6B,NR4A1,PCBP4,PPP1R14C,RGS16,SPP1,TNNI1,TSC22D1
PRKCD	kinase		-0.317	0.000251	BNIP3,CCND1,FOS,JUN,JUNB,NR4A1,SETBP1,SOX2,VEGFA	123 (20)
SMARCA4	transcription regulator		-0.317	2.35e-12	AP1S2,BAMBI,CA14,CCDC85B,CCND1,CDH2,DYNC1H1,E2F1,EGR1,EPHA4,FOS,GADD45A,GADD45G,GAPDH,ID3,IFITM3,JUN,KDM6B,KDR,LUM,MAP1B,MYB,PGK1,PKM,PPP1R14C,RBP1,S100A6,SELENOP,SOX2,SPP1,SPRY2,VIM	143 (21)
HAVCR1	other		-0.319	2.56e-08	B2M,CCN1,CD24,CDK6,FSCN1,HIF1A,JUN,L1CAM,PFKFB3,STC2,VEGFA	99 (9)
miR-3072 (and other miRNAs w/seed GCCCCCU)	mature microRNA		-0.336	0.00131	DACH1,ELAVL3,FZD5,GAS1,GPC2,ID1,JUNB,NKD2,NOVA2,PCBP4,PLP1,PTP4A3,TLCD3B,TTYH1,ZNF385A
PTP4A1	phosphatase		-0.342	0.000315	DNAJB1,HIF1A,PIK3R1,PKM,PTP4A3,STMN2,VIM
miR-3648 (miRNAs w/seed GCCGCGG)	mature microRNA		-0.342	0.00685	CCND1,FAM131C,HIF1A,JUN,JUNB,PHC2,STC2
ERBB2	kinase		-0.349	1.17e-12	ACKR3,BNIP3,CCND1,CD9,CDH2,CDK6,CHD4,E2F1,EGR1,ETFB,ETV5,FOS,FSCN1,GPM6B,H4C3,HES1,HIF1A,HSPB1,ID1,JUN,JUNB,KDR,L1CAM,LDHA,LUM,MAP1B,MIF,MYBL1,MYO10,PDLIM4,PFKFB3,PGK1,PTPRF,S100A6,SMAD2,SOX4,TFAP2C,TSC22D1,VEGFA,VIM,ZFP36L2	153 (24)
TP53	transcription regulator		-0.353	1.96e-15	ARRB2,BNIP3,CCN1,CCND1,CCNG2,CKB,COL2A1,CYB5A,DBI,DDIT4,DEK,DNM1,DPYSL4,DUSP1,E2F1,EGR1,FABP5,FBXW7,FOS,GADD45A,GADD45G,GAPDH,GAS1,GATM,GPI,GPM6B,HES1,HIF1A,HMGN2,HSPB1,ID1,ID3,IGFBP2,JUN,JUNB,KDR,LDHA,LHX2,MCAM,MSRB1,MYBL1,MYO10,NDUFA4L2,ORAI2,PARP1,PCBP4,PCLAF,PFKFB3,PFKP,PIK3R1,PKM,PTP4A3,PTTG1,QDPR,RGS16,SAT1,SFRP2,SOX2,SPP1,TBX3,TMSB10/TMSB4X,TUBA1B,VEGFA,VIM,ZFP36L1	149 (20)
F3	transmembrane receptor		-0.365	0.0009	CCN1,EGR1,FOS,PODXL2,VEGFA	106 (17)
GSK3B	kinase		-0.365	0.00314	CCND1,FOS,HIF1A,KDR,MYB,SPP1	141 (22)
PRRX1	transcription regulator		-0.376	6.26e-06	FOS,HIF1A,SOX2,SOX9,VEGFA	126 (14)
VCAN	other		-0.378	0.00222	FABP5,MAP1B,MIF,PCSK1N,RBP1,SPATS2L,VEGFA	56 (7)
KCNJ2	ion channel		-0.378	0.000404	CCDC88A,COL2A1,DYNC1H1,FOS,KIF1A,LIMCH1,MAP1B
HMOX1	enzyme		-0.378	0.000537	CCND1,CDK6,FOS,ID1,ID3,KDR,VEGFA	149 (22)
miR-4649-5p (and other miRNAs w/seed GGGCGAG)	mature microRNA		-0.378	0.00382	DUSP1,FOSB,GADD45G,HILPDA,IFITM3,VEGFA,ZNF385A
miR-5131 (and other miRNAs w/seed GGCGCCC)	mature microRNA		-0.378	0.0192	CABP1,CCND1,GADD45G,IER2,PRDM13,RAX,TLCD3B
miR-1302 (and other miRNAs w/seed UGGGACA)	mature microRNA		-0.378	0.0051	GATB,HILPDA,MCAM,NHLH1,ONECUT2,RBP1,SMAD2
miR-127-3p (miRNAs w/seed CGGAUCC)	mature microRNA		-0.378	0.0074	BNIP3,GADD45G,H4C3,ONECUT2,PLXNA2,RAX,RLBP1
miR-758-5p (and other miRNAs w/seed GGUUGAC)	mature microRNA		-0.378	0.00539	ASCL1,CADPS,NNAT,ONECUT2,PCLAF,PGK1,PTTG1
miR-6982-3p (miRNAs w/seed GGCCCCU)	mature microRNA		-0.378	0.0178	BTBD17,HOMER3,IER2,OTX2,RLBP1,SLC16A3,STMN2
miR-6955-5p (miRNAs w/seed GGGCCUC)	mature microRNA		-0.378	0.0489	CRAT,E2F1,FZD5,GAPDH,LIMD2,SLC6A9,VSX2
SP110	transcription regulator		-0.378	0.000907	CCN1,E2F1,IFITM3,RARRES2,SMAD2,SOX4,TBX3
NUPR1	transcription regulator		-0.385	5.43e-05	BNIP3,CCN1,CHD4,CREB5,FAM111A,FAM162A,GADD45A,HILPDA,MGLL,PARP1,PFKFB3,PIK3R1,SAT1,SPATS2L,SPP1,VIM,ZFP36L1
CNTF	cytokine		-0.388	0.00248	CLIC1,EGR1,FOS,GATM,JUNB,S100A6,SPP1,VIM	129 (22)
IGF2BP1	translation regulator		-0.391	4.62e-05	E2F1,GADD45A,LUM,MIF,SOX9
BCL3	transcription regulator		-0.397	7.22e-05	CCND1,EGR1,FOS,ID1,JUN,NR4A1	132 (22)
miR-221-3p (and other miRNAs w/seed GCUACAU)	mature microRNA		-0.41	0.00586	CDKN1C,DDIT4,FOS,INA,KDR,MIDN,MYBL1,PIK3R1,ZNF385A
miR-6835-5p (and other miRNAs w/seed GGGGGUA)	mature microRNA		-0.416	0.000189	ASCL1,ELAVL3,ETV5,FOSB,ISYNA1,KDM6B,MIDN,NOVA2,NR4A1,NREP,PCLAF,PRSS35,RAB3A,RCOR2,SCRT1,SOX4,TLCD3B,TMSB10/TMSB4X,VSX2,ZFP36L1
AHR	ligand-dependent nuclear receptor		-0.419	8.69e-10	ACKR3,BASP1,BZW2,CCND1,CCNG2,CDH2,DNAJB1,E2F1,ENO1,FOS,GADD45A,GAS1,HES1,HIF1A,JUN,JUNB,LDHA,MCAM,PLXNA2,RBP1,SOX2,SOX9,SPP1,VEGFA,VIM	148 (20)
TCF4	transcription regulator		-0.434	4.32e-05	ASCL1,BNIP3,CD9,CDK6,CDKN1C,DACH1,FAM111A,HES1,HIF1A,ID3,SELENOP,SMAD2,SOX9,VASH2	60 (7)
IL12 (complex)	complex		-0.447	0.0262	FOS,GADD45G,JUN,MIF,SMAD2,VEGFA
RXRB	ligand-dependent nuclear receptor		-0.447	0.0143	ATP1A3,CDK6,GADD45G,MAP1B,S100A6,SPP1
MAPT	other		-0.447	1.23e-12	ATP1A3,BASP1,BSG,CCND1,CD9,CKB,CRYM,DBI,DYNC1H1,ENO1,FOS,GAPDH,GPM6B,HIF1A,HSPB1,IFITM3,IGFBP2,JUN,MAP1B,PGK1,PKM,QDPR,RARRES2,S100A6,SLC16A3,SLC1A3,STMN2,TPI1,TUBA1B,VEGFA,VIM	159 (20)
miR-6509-5p (miRNAs w/seed UUAGGUA)	mature microRNA		-0.447	0.00461	ARRB2,BAMBI,HIF1A,MYB,PFKFB3
miR-495-3p (and other miRNAs w/seed AACAAAC)	mature microRNA		-0.447	0.0207	BNIP3,CD9,DDIT4,IER2,PTTG1
miR-4529-5p (miRNAs w/seed GGCCAUC)	mature microRNA		-0.447	0.0321	APBA2,EGR1,KIRREL2,LOXL1,MYB
miR-1301-3p (and other miRNAs w/seed UGCAGCU)	mature microRNA		-0.447	0.0375	LDHA,MARCKSL1,MYBL1,NOL4,RHEB
SIX1	transcription regulator		-0.447	0.0101	CRAT,DACH1,L1CAM,OTX2,TNNI1
YBX1	transcription regulator		-0.447	0.00364	CDK6,FOS,HIF1A,ID1,PLXNA2,STC2	129 (13)
NGEF	other		-0.447	0.00241	COL2A1,LIMCH1,SLC6A9,SLCO5A1,SOX9	75 (7)
TGM2	enzyme		-0.447	0.0419	BNIP3,CCND1,CDK6,HIF1A,ID1,SPP1
NR3C2	ligand-dependent nuclear receptor		-0.447	0.00531	DDIT4,EGR1,JUNB,KDR,MSRB1,VEGFA	164 (23)
miR-7000-3p (miRNAs w/seed ACCCACC)	mature microRNA		-0.447	0.0329	CLIC1,FOSB,MGLL,S100A6,VASH2
miR-5088-3p (miRNAs w/seed CCCUUCU)	mature microRNA		-0.447	0.0202	ARRB2,GAS1,GPC2,HMGN2,VAX2
miR-3912-5p (miRNAs w/seed UGUCCAU)	mature microRNA		-0.447	0.0166	CHRNA3,CXXC5,LRRN3,OTX2,SOX2
miR-6890-5p (miRNAs w/seed AUGGGGU)	mature microRNA		-0.447	0.0273	ASCL1,SCRT1,SORCS1,TNNI1,VIPR2
miR-3620-3p (miRNAs w/seed UGCUCAG)	mature microRNA		-0.447	0.00636	AP1S2,B2M,GAPDH,LRRN3,SLC1A3
miR-7214-3p (miRNAs w/seed UCAGUCC)	mature microRNA		-0.447	0.0236	DDIT4,HOMER3,ID3,NOL4,PTTG1
SPIB	transcription regulator		-0.447	0.00461	COL2A1,EGR1,KDM6B,KDR,PTPRF
PITX2	transcription regulator		-0.452	6.07e-07	CCND1,CDH2,DACH1,EGR1,GADD45A,LDHA,LHX2,SOX2,TBX3,TFAP2B,VIM	150 (27)
FGF21	growth factor		-0.453	0.0106	CCND1,EGR1,FOS,VIM
QKI	other		-0.463	0.000409	FABP7,GPM6B,ID1,MAP1B,SOX2,VIM	82 (7)
IL3	cytokine		-0.47	0.000409	APBA2,CCND1,CRAT,EGR1,ELAVL3,FOS,GADD45A,GADD45G,JUN,JUNB,SOX4,VEGFA	146 (23)
WT1	transcription regulator		-0.47	0.008	CCND1,CLIC1,EGR1,FOSB,JUNB,SOX9,TSC22D1,VEGFA	103 (12)
miR-546 (miRNAs w/seed UGGUGGC)	mature microRNA		-0.478	0.0232	ATP1A3,DUSP26,ENO1,GAS1,MSRB1,SMIM20,TLE5
miR-6733-3p (and other miRNAs w/seed CAGUGUC)	mature microRNA		-0.478	0.00859	ADAMTS6,CKB,DPYSL4,GAPDH,NREP,PTTG1,VAX2
CDK19	kinase		-0.478	5.5e-05	DDIT4,FBXW7,GADD45A,JUN,SAT1,TBX3,TSC22D1,ZFP36L1
DCN	other		-0.48	0.00293	CDKN1C,DUSP1,HIF1A,VEGFA	145 (22)
RAS	group		-0.488	0.000101	BNIP3,CCK,CCND1,EGR1,FOS,JUN,VEGFA,VIM	127 (22)
RAF1	kinase		-0.498	2.48e-09	CCND1,E2F1,EGR1,FOS,HIF1A,HSPB1,ID3,IER2,JUN,LDHA,MGLL,SPRY2,TNNI1,TSC22D1,VEGFA,ZFP36L2	148 (24)
IL6	cytokine		-0.5	2.57e-09	BAMBI,CCK,CCND1,COL2A1,DUSP1,E2F1,EGR1,EPHA4,FOS,FSCN1,GADD45A,GADD45G,GAL,HIF1A,HOMER3,ID1,IFITM3,JUN,JUNB,KDR,LGR4,MYB,PCLAF,PTP4A3,PTTG1,SOX2,SOX4,SPP1,TF,VEGFA,VIM	143 (19)
let-7a-5p (and other miRNAs w/seed GAGGUAG)	mature microRNA		-0.505	0.0361	BCL7A,BSG,BZW2,CCND1,CDH2,CDK6,GATM,LIMD2,ONECUT2,RGS16,RNF165,SMAD2,VIM
IL2	cytokine		-0.511	2.94e-08	CCND1,CCNG2,CD9,CDK6,CDKN1C,CRMP1,DDIT4,DUSP1,ENO1,EPHA4,FOS,FOSB,GADD45G,GAPDH,JUN,JUNB,L1CAM,LDHA,MYB,PDLIM4,PGK1,RGS16,S100A6,SPP1,STC2,TPI1,VEGFA,VIM	148 (20)
ZEB1	transcription regulator		-0.52	2.66e-06	AP1S2,CCN1,CCNG2,CDH2,MAP1B,PFKP,PKM,TF,VIM	109 (7)
PRMT5	enzyme		-0.521	0.000473	CCND1,GAS1,SOX2,SOX9,WIF1	92 (14)
MED1	transcription regulator		-0.522	3.04e-05	BCL7A,CCND1,CREB5,E2F1,GADD45A,HILPDA,PTMA,SOX2,STC2,TBX3,TNNI1
mir-10	microRNA		-0.532	0.0015	CCN1,E2F1,FZD5,HIF1A,SMAD2,VEGFA	93 (12)
WNT1	cytokine		-0.538	3.22e-07	CCND1,CD24,EGR1,FOS,GADD45G,GAS1,HES1,JUN,JUNB,OTX2,SPP1	143 (22)
TSH	complex		-0.542	8.56e-05	CCND1,EGR1,FOS,GAPDH,JUNB,KDR	145 (22)
BMP6	growth factor		-0.555	0.00544	E2F1,ETV5,ID1,ID3,VEGFA	84 (14)
PSEN2	peptidase		-0.555	0.0255	CD9,FBXW7,GAPDH,PTPRF
ZBTB16	transcription regulator		-0.555	0.0104	CCND1,FABP7,GATM,ID3,PIK3R1,SPP1,TSC22D1
CDK6	kinase		-0.555	0.00713	CDK6,CREB5,FOS,GADD45A,JUN	126 (19)
GSTO1	enzyme		-0.555	0.000685	CD9,MTUS1,SAT1,SOX4,ZFP36L1
PELP1	other		-0.555	0.00087	CCND1,CCNG2,CXXC5,FOS,MAP1B,RBP1,SLC1A3	111 (16)
ARID1A	transcription regulator		-0.557	4.11e-06	CD24,CDKN1C,CKB,FSCN1,FZD5,HES1,L1CAM,PGK1,PKM,SOX2,SOX9,VIM,WIF1	153 (22)
miR-128-3p (and other miRNAs w/seed CACAGUG)	mature microRNA		-0.57	0.0323	BAZ2B,DBI,NREP,ONECUT2,SMIM20,TMSB10/TMSB4X,ZNF385D
MGA	transcription regulator		-0.57	4.17e-06	BNIP3,CCND1,GPC2,NREP,PODXL2,SELENOP,TF	9 (3)
STAT3	transcription regulator		-0.575	1.72e-14	CCDC88A,CCND1,CD9,CDH2,DDIT4,DUSP1,EGR1,FOS,FSCN1,GADD45A,GADD45G,HIF1A,ID1,ID3,IFITM3,JUN,JUNB,KDR,LDHA,LGR4,MIAT,MYB,NR4A1,OTX2,PAX6,PFKFB3,PGK1,PTPRF,PTTG1,SLC1A3,SOX11,SOX2,SOX4,SPP1,STC2,TRPM3,VEGFA,VIM	139 (18)
miR-6798-5p (miRNAs w/seed CAGGGGG)	mature microRNA		-0.577	0.00233	CELF3,FOSB,FSCN1,FXYD1,GAS1,HES4,ONECUT2,RNF165,SCRT1,STMN2,TLE3,TTYH1
BACH2	transcription regulator		-0.577	0.00767	ETV5,ID3,JUN,JUNB	81 (7)
Immunoglobulin	complex		-0.577	4.46e-08	B2M,BSG,CCND1,CD9,CDH2,CDK6,CDKN1C,DBI,DDIT4,DUSP1,EGR1,ENO1,ETV5,FOS,FOSB,GPI,HIF1A,IFITM3,KDR,MYB,NR4A1,PDLIM4,PGK1,PIK3R1,RGS16,SAT1,SFRP2,SLC6A9,SOX2,SOX9,SPP1,VEGFA,ZFP36L2	150 (20)
E2F3	transcription regulator		-0.581	0.000149	CCND1,CD9,DEK,E2F1,ID3,MYB,PCLAF,PTMA,PTTG1	115 (13)
CITED2	transcription regulator		-0.586	0.00327	B2M,DUSP1,HIF1A,PFKFB3,PGK1,SAT1,SLC1A3,VEGFA	137 (17)
Calcineurin protein(s)	complex		-0.59	0.00116	DUSP1,EGR1,FOS,NR4A1,SPP1	100 (20)
PTEN	phosphatase		-0.599	1.74e-11	CADPS,CCND1,CDH2,CDK6,DUSP1,E2F1,FOS,GAPDH,GPM6B,HIF1A,ID4,IGFBP2,JUN,KDR,L1CAM,LOXL1,MCAM,PARP1,PFKFB3,PGK1,PIK3R1,PKM,PTPRF,PYGL,SAT1,SELENOP,SMAD2,SOX4,SOX8,SPP1,SPRY2,VEGFA,VIM	150 (24)
IHH	enzyme		-0.6	0.00058	CCND1,COL2A1,ENO1,KDR,SPP1,VEGFA	53 (7)
TGFB1	growth factor		-0.602	3.73e-22	B2M,BAMBI,BSG,CCDC85B,CCN1,CCND1,CCNG2,CD9,CDH2,CDKN1C,CHD4,COL2A1,CRMP1,DACH1,DDIT4,DUSP1,E2F1,EGR1,ENO1,FABP5,FNDC5,FOS,FOSB,FSCN1,FTL,FZD5,GADD45A,GAL,GAS1,GATM,GPI,HES1,HIF1A,HMGN2,HSPB1,ID1,ID3,ID4,IER2,IGFBP2,JUN,JUNB,KDM6B,KDR,L1CAM,LDHA,LOXL1,MAP1B,MEG3,MYB,MYBL1,MYO10,NR4A1,PARP1,PDLIM4,PFKFB3,PFKP,PGK1,PKM,PTP4A3,S100A6,SLC16A3,SMAD2,SOX2,SOX4,SOX9,SPP1,STC2,TBX2-AS1,TBX3,TLE4,TPI1,TSC2…	149 (17)
miR-6737-5p (and other miRNAs w/seed UGGGGUG)	mature microRNA		-0.603	0.00377	ASCL1,CCND1,ELAVL3,FAM111A,HOMER3,MAP1B,MCAM,MIDN,MIF,NOVA2,PHC2,RBP1,SCRT1,TNNI1,VIM,VSX2,ZFP36L1,ZNF385A
GLI2	transcription regulator		-0.625	0.000331	CCND1,E2F1,JUNB,PFKFB3,SOX9,SPP1,VIM	130 (19)
OGA	enzyme		-0.626	2.95e-10	CADPS,CCND1,CCNG2,CD24,CDK6,CREB5,EPHA4,FABP7,FSCN1,GADD45A,GADD45G,GAS1,JUN,MCAM,MGLL,MYO10,OTX2,PIK3R1,PYGL,S100A6,SOX2,SOX9,VIM	106 (7)
miR-4706 (and other miRNAs w/seed GCGGGGA)	mature microRNA		-0.632	0.00576	ELAVL3,HES4,ISYNA1,NDUFA4L2,PCSK1N,PHC2,RAX,TLE4,TNNI1,ZNF385A
CST5	other		-0.632	0.000906	ID3,LIMD2,MAP1B,MYO10,PCLAF,RBP1,SLC1A3,SMAD2,SOX4,VIM
miR-6943-5p (miRNAs w/seed GGGGUGA)	mature microRNA		-0.632	0.0132	ASCL1,FAM111A,FOSB,FSCN1,HOMER3,LIMD2,MIDN,RNF165,TNNI1,ZFP36L1
MIF	cytokine		-0.64	0.0236	CCND1,DUSP1,FOS,HIF1A,JUN
AKT1	kinase		-0.64	6.15e-09	CCND1,E2F1,EGR1,ENO1,FABP5,FOS,FOSB,GATM,HIF1A,KDR,MYB,PIK3R1,PKM,PLP1,SOX2,SPP1,VEGFA,VIM	126 (21)
PI3K (complex)	complex		-0.641	1.83e-07	CCND1,CCNG2,CDH2,DDIT4,DUSP1,E2F1,FABP5,FOS,HIF1A,IGFBP2,JUN,KDR,MCAM,SOX9,SPP1,VEGFA	142 (22)
ELAVL1	other		-0.647	1.69e-05	ASCL1,B2M,CCN1,CDH2,DUSP1,FOS,HIF1A,IFITM3,PTMA,SAT1,VEGFA,VIM	148 (21)
GNAS	enzyme		-0.647	0.00081	BCL7A,CCN1,FOS,GADD45G,NR4A1,SCG3,SPP1,TSC22D1	116 (17)
SPHK1	kinase		-0.651	0.00293	CCND1,EGR1,HIF1A,JUN	148 (21)
JAK	group		-0.651	9.68e-05	CDH2,HES6,HIF1A,IFITM3,VIM	131 (15)
mir-142	microRNA		-0.651	0.00102	HIF1A,MCAM,MYB,SOX2,TSC22D1
miR-5586-5p (miRNAs w/seed AUCCAGC)	mature microRNA		-0.651	0.00825	AP1S2,FOS,HMGN2,LDHA,PGK1
POSTN	other		-0.651	0.000108	HES1,LOXL1,SPP1,TNNI1,VIM	94 (11)
WNT4	cytokine		-0.655	0.000343	CCND1,CDH2,GAS1,ID1,SPP1	75 (7)
TCF7L2	transcription regulator		-0.655	5.06e-10	APLP1,BAMBI,CCND1,CD24,CREB5,FOS,ID1,ID3,ID4,IGFBP2,JUN,MCAM,MYB,NNAT,PCSK1N,PLP1,PPP1R14A,SOX2,SOX9,SPP1,ST18,VEGFA,VIM	157 (21)
XDH	enzyme		-0.659	4.62e-05	DUSP1,HIF1A,ID3,SPP1,VIM	120 (17)
CALCA	other		-0.659	0.0133	FOS,HIF1A,HILPDA,JUNB,KDR,NR4A1
TAL1	transcription regulator		-0.662	0.000844	CCNG2,CDK6,FBXW7,JUN,LRRN3,MYB,RBFOX3,SOX4,SPRY2
THRA	ligand-dependent nuclear receptor		-0.662	0.0028	CAMK4,CCND1,E2F1,FOS,JUN,PTTG1,SFRP2	121 (21)
FASLG	cytokine		-0.664	0.0002	CD24,EGR1,FOS,SOX2,VEGFA	143 (26)
INHBA	growth factor		-0.678	2.57e-05	BAMBI,CCND1,CD24,CDH2,DACH1,JUNB,RGS16,SOX2,SOX4,VEGFA,VIM	149 (22)
EIF4G2	translation regulator		-0.686	8.31e-05	HIF1A,JUN,SOX2,TBX3
Raf	group		-0.694	5.57e-08	CCND1,E2F1,EGR1,ETV5,FOS,IER2,JUN,SPRY2,TFAP2C	128 (22)
SRC	kinase		-0.7	1.62e-07	CCND1,DUSP1,ENO1,FOS,HIF1A,ID1,JUN,PGK1,SPP1,VEGFA,VIM	152 (20)
Creb	group		-0.704	4.28e-11	APBA2,CCK,CCN1,CCND1,DUSP1,EGR1,ETV5,FOS,FOSB,FSCN1,HES1,JUN,JUNB,MCAM,MIF,MYB,NR4A1,PGK1,SOX4,SOX9,TF,VEGFA	165 (23)
miR-1956 (and other miRNAs w/seed GUCCAGG)	mature microRNA		-0.707	0.0258	BARHL2,FABP5,FAM131C,LOXL1,SORCS1,TFAP2C,VIPR2,VSX2
miR-7108-3p (miRNAs w/seed CCCGCCC)	mature microRNA		-0.707	0.0163	CCN1,FSCN1,HES4,MIDN,PTPRF,RNF165,SCRT1,SOX8
NFKB2	transcription regulator		-0.714	0.00567	CCND1,FOS,FZD5,MARCKSL1,MYB,ZFP36L1	102 (16)
miR-4314 (and other miRNAs w/seed UCUGGGA)	mature microRNA		-0.718	0.0421	APLP1,BCL7A,CAMK4,FOSB,MLLT11,MOB3B,NHLH1,ONECUT2,ORAI2,SLCO5A1,TMEM37,TUBA1B,ZFP36L1
Ngf	group		-0.723	9.18e-08	CCND1,DUSP1,EGR1,FOS,IER2,JUN,MYB,NR4A1,STMN2	127 (22)
miR-4802-3p (and other miRNAs w/seed ACAUGGA)	mature microRNA		-0.728	0.0136	AP1S2,CADPS,FOS,GPC2,NREP,SOX2
STAT1	transcription regulator		-0.732	0.00721	B2M,CCND1,EGR1,FOS,HES1,HIF1A,IFITM3,JUN,PAX6,SMAD2,VEGFA	131 (19)
SIRT1	transcription regulator		-0.735	2.64e-06	BNIP3,CCND1,CCNG2,CD9,CDH2,COL2A1,ENO1,GADD45A,HIF1A,ID1,IFITM3,KIF1A,LDHA,PARP1,PTF1A,RGS16,SFRP2,VIM	145 (20)
TSHZ3	transcription regulator		-0.739	0.000315	CRYM,CXXC5,FOSB,IER2,NR4A1	33 (5)
TNF	cytokine		-0.739	2.46e-12	ACKR3,B2M,BAMBI,CABP1,CCK,CCN1,CCND1,CDH2,COL2A1,DBI,DDIT4,DUSP1,E2F1,EGR1,ETV5,FABP5,FOS,FOSB,FSCN1,FZD5,GADD45A,GADD45G,HES1,HIF1A,ID1,ID3,IER2,IFITM3,IGFBP2,JUN,JUNB,KDR,LDHA,MARCKSL1,MCAM,MIF,NKD2,NR4A1,PARP1,PAX6,PKM,PLP1,PRSS23,RARRES2,RBP1,RGS16,SAT1,SELENOP,SLC1A3,SOX2,SOX4,SOX9,SPP1,SPRY2,TF,TFAP2C,THBS3,VEGFA,VIM,VIPR2	159 (19)
AR	ligand-dependent nuclear receptor		-0.747	7.02e-06	ATP1A3,BASP1,CCDC85B,CCND1,CDH2,CXXC5,DDIT4,EGR1,FABP5,FABP7,GADD45G,HIF1A,MYB,PCSK1N,PDLIM4,PLP1,PTPRF,SLCO3A1,SOX9,SPP1,TF,VEGFA,VIM	161 (21)
DDX5	enzyme		-0.749	0.00179	CCND1,COL2A1,DUSP1,FOS,JUN,VEGFA	152 (20)
ITGA5	transmembrane receptor		-0.758	5.08e-08	CCND1,CDH2,COL2A1,FOS,GAS1,IGFBP2,JUN,JUNB	140 (21)
FGFR	group		-0.762	4.52e-05	FOS,PAX6,SOX2,SPP1	135 (23)
Integrin	complex		-0.762	2.82e-05	CCND1,FOS,JUN,VEGFA	124 (22)
INHA	growth factor		-0.762	0.028	CCN1,E2F1,PIK3R1,PRSS23
ITK	kinase		-0.762	0.0147	FOS,HIF1A,SPRY2,TF
Lh	complex		-0.763	3e-05	CDKN1C,DUSP1,EGR1,FOS,GADD45G,JUN,JUNB,NR4A1,PGK1,PTPRF,RGS16,SLC16A3,TBX3,VEGFA	99 (19)
FSH	complex		-0.774	9.38e-10	CAMK4,CCND1,CDH2,CDK6,CDKN1C,CRYM,DUSP1,FOS,FOSB,HIF1A,ID1,ID4,JUN,JUNB,NR4A1,PGK1,PKM,PTPRF,RGS16,SMAD2,TF,VEGFA	156 (24)
SRSF3	other		-0.775	2.82e-05	CCND1,E2F1,JUN,VEGFA	83 (7)
MRTFB	transcription regulator		-0.777	5.44e-05	CCN1,CD24,EGR1,GADD45A,GAS1,ID1,LIMCH1,LOXL1,NREP,SELENOP	78 (8)
CD28	transmembrane receptor		-0.779	0.000553	CCND1,CDK6,FOS,GAPDH,HMGN2,JUN,LDHA,NR4A1,ORAI2,PTMA,SLC16A3,TSC22D1	127 (22)
BMP4	growth factor		-0.791	1.82e-12	ASCL1,CCN1,CCND1,COL2A1,CXXC5,DEK,HES1,ID1,ID3,JUN,JUNB,KDR,L1CAM,PFKFB3,PKM,SOX2,SOX9,TBX3,TFAP2C,VEGFA	128 (22)
BDNF	growth factor		-0.795	1.49e-10	ATP1A3,CCN1,CELF4,CRMP1,DUSP1,EGR1,FOS,FOSB,FSCN1,FTL,JUN,KIF1A,MAP1B,NR4A1,PFKFB3,PLP1,RAB3A,SFRP2,SPP1,SPRY2,VIM	116 (19)
CHD8	enzyme		-0.808	0.000161	ASCL1,LHX2,NEUROD4,PAX6,PIK3R1,TUBA1B
CD3	complex		-0.809	2.29e-05	BAMBI,CCND1,CDK6,ELAVL3,FOS,FTL,GAPDH,HIF1A,HMGN2,ID3,ID4,JUN,JUNB,NR4A1,ORAI2,PTMA,PYGL,VEGFA,VIPR2,ZFP36L1	142 (20)
TRIM37	enzyme		-0.811	0.000108	CDH2,CKB,EGR1,MYB,VIM	97 (10)
STAT5a/b	group		-0.816	0.00291	CCND1,DUSP1,EPHA4,FOS,RBP1,TNNI1	111 (20)
ZC3H12A	enzyme		-0.816	0.0162	DUSP1,FAM111A,FOS,JUNB,ZFP36L1,ZNF608
miR-10a-5p (and other miRNAs w/seed ACCCUGU)	mature microRNA		-0.816	0.0204	FAM131C,SOX2,TFAP2C,TLCD3B,TNNI1,VIM
miR-4707-5p (miRNAs w/seed CCCCGGC)	mature microRNA		-0.816	0.00221	HES4,MCAM,PFKFB3,PTMS,SLC25A6,SOX4
miR-4640-3p (miRNAs w/seed ACCCCCU)	mature microRNA		-0.816	0.0204	CCDC85B,FOSB,PLP1,RNF165,SOX4,STC2
miR-339-3p (miRNAs w/seed GAGCGCC)	mature microRNA		-0.816	0.0268	CYB5A,ID1,MCAM,MSRB1,NREP,PFKFB3
miR-4713-5p (miRNAs w/seed UCUCCCA)	mature microRNA		-0.816	0.0464	HILPDA,MYB,ORAI2,PRSS35,PTF1A,RNF165
miR-3124-3p (and other miRNAs w/seed CUUUCCU)	mature microRNA		-0.816	0.0174	ID4,PAX6,PLP1,SLCO3A1,ST18,TMSB10/TMSB4X
miR-3162-5p (miRNAs w/seed UAGGGAG)	mature microRNA		-0.816	0.0308	MLLT11,MOB3B,NOVA2,RLBP1,RNF165,ZNF385A
miR-659-3p (miRNAs w/seed UUGGUUC)	mature microRNA		-0.816	0.000281	CXXC5,DUSP1,GADD45A,ONECUT2,PTMA,SELENOP
CX3CL1	cytokine		-0.816	1.28e-07	CCND1,FABP5,FABP7,HIF1A,MAP1B,PAX6,PLP1,SMAD2,SOX4,SPON2,SPP1,TFAP2C	145 (20)
SYVN1	transporter		-0.816	0.00531	CCND1,DUSP1,HSPB1,L1CAM,MCAM,TLE5
RRAS2	enzyme		-0.816	0.00391	CDH2,EGR1,FSCN1,HES1,IFITM3,RGS16
DNMT3B	enzyme		-0.816	0.000754	CAMK4,DNAJB1,KDR,PAX6,PPP1R14C,RGS16,SFRP2,TNNI1
miR-6770-3p (miRNAs w/seed UGGCGGC)	mature microRNA		-0.816	0.00623	BASP1,FXYD1,HSPB1,RAX,SH3BGRL3,VEGFA
miR-6886-3p (miRNAs w/seed GCCCUUC)	mature microRNA		-0.816	0.013	BARHL2,BTBD17,ETV5,MCAM,MGLL,RBFOX3
miR-6949-3p (miRNAs w/seed UCCCCUU)	mature microRNA		-0.816	0.00866	ASCL1,ELAVL3,ID4,SOX4,TLCD3B,TNNI1
miR-6973b-3p (and other miRNAs w/seed GCUCUCU)	mature microRNA		-0.816	0.0441	FNDC5,LGI4,PFKP,PLP1,SPON2,VIPR2
miR-6749-5p (miRNAs w/seed CGGGCCU)	mature microRNA		-0.816	0.00866	CRAT,IER2,LDHA,MIF,SCRT1,TMEM37
EZH2	transcription regulator		-0.821	3.08e-06	ACKR3,CADPS,CCND1,CDH2,CDK6,CDKN1C,E2F1,EGR1,ID1,MYO10,NKD2,PAX6,PTP4A3,SFRP2,SLC1A3,TBX3,VEGFA,WIF1	157 (25)
ESR2	ligand-dependent nuclear receptor		-0.827	5.64e-07	ACKR3,BAMBI,CCN1,CCND1,CDH2,CDK6,CDKN1C,DBI,DEK,EGR1,FOS,FSCN1,JUNB,KDR,LIMCH1,LOXL1,LRRN3,PYGL,SMAD2,SOX11,SOX4,SPP1,TLE5,TSC22D1,VEGFA,VIM	155 (20)
PTGS2	enzyme		-0.829	0.00111	B2M,CCND1,DUSP1,EGR1,FOS,KDR,NKD2,PTMA,VEGFA	148 (21)
IL11	cytokine		-0.832	0.000186	COL2A1,FOS,IGFBP2,JUN,JUNB,SPP1	133 (23)
TEAD4	transcription regulator		-0.842	5.65e-10	CCK,CCN1,CCND1,CDH2,CDK6,HIF1A,JUN,JUNB,LIMCH1,LOXL1,TFAP2C,VEGFA,VIM	147 (20)
SMAD2	transcription regulator		-0.842	4.89e-05	CCNG2,CDH2,COL2A1,HES1,SMAD2,SOX2,VEGFA,VIM	151 (23)
NFATC3	transcription regulator		-0.847	0.000842	DDIT4,FOS,FOSB,JUN,NR4A1	100 (12)
NANOG	transcription regulator		-0.862	6.74e-12	CDK6,E2F1,EGR1,FOS,FOSB,ID1,ID3,ID4,KDR,LHX2,MAP1B,PAX6,REST,S100A6,SMAD2,SOX2,TBX3	138 (10)
KAT2A	enzyme		-0.87	1.08e-06	BNIP3,CCND1,E2F1,FABP5,H4C3,JUN,JUNB,LDHA,PFKFB3,PIK3R1	125 (17)
PTTG1	transcription regulator		-0.871	2.77e-05	CCND1,CDH2,HIF1A,MIF,SOX2,VEGFA,VIM	127 (18)
MAP2K4	kinase		-0.871	0.00356	CCND1,FOS,GADD45A,JUN	113 (17)
SREBF1	transcription regulator		-0.873	0.00101	CYB5A,DBI,FABP5,FABP7,RBP1,SELENOP,SEZ6L2,TF,TNNI1,VEGFA	103 (8)
SMAD3	transcription regulator		-0.874	4.69e-09	CCND1,CCNG2,CDH2,COL2A1,EGR1,FNDC5,FOS,ID1,ID3,JUN,JUNB,LUM,PTP4A3,SOX2,SPP1,TBX3,TF,VEGFA,VIM	136 (23)
CRH	cytokine		-0.875	0.00844	FOS,JUNB,NR4A1,VEGFA	109 (22)
N6AMT1	enzyme		-0.883	0.00794	BCL7A,DACH1,IFITM3,MIF,PRSS23,REST
NOTCH1	transcription regulator		-0.894	1.27e-15	ASCL1,CCN1,CCND1,CDH2,CDKN1C,E2F1,EPHA4,FABP7,FOS,FOSB,HES1,HIF1A,ID1,IGFBP2,LDHA,MCAM,NHLH1,PFKFB3,PGK1,PKM,RLBP1,SOX2,SPP1,SPRY2,VEGFA	152 (24)
miR-6887-3p (miRNAs w/seed CCCCUCC)	mature microRNA		-0.894	2.09e-05	ARRB2,CCN1,CELF3,E2F1,ELAVL3,FXYD1,GPC2,JUN,JUNB,MIDN,RLBP1,RNF165,SLC6A9,SOX11,SOX2,SOX4,TLCD3B,TLE5,TNNI1,ZNF385A
miR-200b-3p (and other miRNAs w/seed AAUACUG)	mature microRNA		-0.894	0.00456	AP1S2,PCLAF,PTPRF,RBFOX3,VASH2,VEGFA,VIM
TFAP4	transcription regulator		-0.896	1.41e-05	CCNG2,CDH2,EGR1,FOS,ID1,VIM	99 (7)
TSC2	other		-0.896	0.000101	ATP6V0B,CCND1,E2F1,EGR1,FOS,HIF1A,HSPB1,IFITM3,S100A6	142 (24)
miR-6782-5p (and other miRNAs w/seed AGGGGUG)	mature microRNA		-0.898	0.00793	BZW2,CRYM,ELAVL3,FOSB,FXYD1,KDM6B,NDUFA4L2,NHLH1,NOVA2,SCRT1,SLC16A3,TLE4,VSX2
MAPK14	kinase		-0.899	5.78e-06	CCND1,DUSP1,FOS,GADD45A,JUN,JUNB,KDR,SOX2,SOX9,SPP1,VEGFA,WIF1	137 (19)
FOXC1	transcription regulator		-0.905	2.71e-07	B2M,COL2A1,EGR1,FOS,FOSB,IFITM3,JUN,MYB,PAX6,SOX9,SPP1,TSC22D1	149 (24)
TNFSF11	cytokine		-0.908	0.000326	BSG,CCND1,CKB,DUSP1,FOS,JUN,JUNB,MARCKSL1,RGS16,SOX8,SPP1	117 (21)
SOX4	transcription regulator		-0.913	0.000468	CDH2,FOS,LRRN3,MARCKSL1,NREP,PLXNA2,PYGL,TLE5,VIM
mir-148	microRNA		-0.931	0.00107	CDH2,EGR1,PKM,VIM
CSF2	cytokine		-0.933	8.24e-05	BSG,CCND1,CD24,EGR1,FOS,HIF1A,HILPDA,ID3,IFITM3,JUN,JUNB,LDHA,MYB,NR4A1,SPP1,TF,TPI1	133 (23)
PIN1	enzyme		-0.958	0.012	CCND1,CDH2,FBXW7,HES1
miR-491-5p (and other miRNAs w/seed GUGGGGA)	mature microRNA		-0.961	0.0415	ASCL1,BARHL2,CHRNA3,ELAVL3,HES4,ISYNA1,L1CAM,LDHA,MGLL,MIDN,MOB3B,NOVA2,RAB3A,SOX11,TLE5,TNNI1,VSX2,ZFP36L1
RELA	transcription regulator		-0.964	4.19e-12	B2M,CCND1,COL2A1,DUSP1,E2F1,EGR1,FOS,FOSB,FSCN1,HES1,HIF1A,ID1,IER2,IGFBP2,JUN,JUNB,LUM,MIF,MYB,NR4A1,PARP1,PKM,S100A6,SOX9,TMSB10/TMSB4X,VEGFA,VIM	138 (18)
IL1B	cytokine		-0.97	1.47e-13	B2M,BAMBI,CABP1,CCND1,CDH2,COL2A1,DACH1,DBI,DDIT4,DUSP1,E2F1,EGR1,FABP5,FOS,FOSB,GADD45A,HES1,HIF1A,HSPB1,ID3,IER2,IFITM3,JUN,JUNB,KDR,LDHA,MARCKSL1,MGLL,MIF,NR4A1,PAX6,PFKP,PPP1R14A,RGS16,S100A6,SAT1,SELENOP,SLC1A3,SOX2,SOX9,SPP1,ST18,STMN2,VEGFA,VIM	149 (23)
PLCG1	enzyme		-0.97	1.91e-06	CCND1,EGR1,FOS,KDR,LDHA	126 (24)
TWIST2	transcription regulator		-0.97	0.000182	CCND1,CD24,CDH2,SOX2,VIM	117 (13)
miR-3150a-3p (and other miRNAs w/seed UGGGGAG)	mature microRNA		-0.971	0.000533	CELF3,ELAVL3,FOSB,FXYD1,HES1,HES4,LIMD2,MARCKSL1,MOB3B,NHLH1,NNAT,NOVA2,PCBP4,RAX,SELENOP,SOX11,TNNI1,TSC22D1,ZFP36L1,ZNF385A
NPM1	transcription regulator		-0.971	1.79e-06	BAMBI,CCN1,E2F1,EGR1,HILPDA,JUN,JUNB,NR4A1,TFAP2C,VEGFA,ZFP36L1	123 (13)
F7	peptidase		-0.99	2.58e-07	CCN1,CCND1,EGR1,FOS,GADD45A,IER2,VEGFA	144 (22)
MITF	transcription regulator		-0.993	6.26e-06	AP1S2,CA14,CCNG2,COL2A1,FOS,GPM6B,HES1,HIF1A,OTX2,PAX6,QDPR,SOX9,VSX2
TEAD1	transcription regulator		-1	0.00794	CCN1,CCND1,CDK6,ETFB,LIMCH1,LOXL1
CCAR2	peptidase		-1	0.000809	CCND1,CDK6,CREB5,KIF1A
nicotinic acetylcholine receptor	complex		-1	0.000221	FOS,ID1,JUN,JUNB	155 (21)
Bvht	other		-1	0.00884	KDR,LIMCH1,TNNI1,VIM
LLGL2	other		-1	0.000291	CCN1,DUSP1,ETV5,FSCN1
WDR5	transcription regulator		-1	0.000164	CDH2,SFRP2,SPP1,VIM
miR-4656 (and other miRNAs w/seed GGGCUGA)	mature microRNA		-1	0.0138	CCK,CELF3,CRAT,CREB5,FXYD1,GAS1,HES6,IFITM3,ISYNA1,NHLH1,NNAT,ORAI2,PTP4A3,RNF165,VIPR2,VSX2
miR-4655-5p (miRNAs w/seed ACCGGGG)	mature microRNA		-1	0.021	ELAVL3,ENO1,HES4,KIRREL2
miR-149-5p (miRNAs w/seed CUGGCUC)	mature microRNA		-1	0.0384	APBA2,CRAT,E2F1,FNDC5,FZD5,ID3,MARCKSL1,SEC61G,ZNF385D
miR-4786-3p (miRNAs w/seed GAAGCCA)	mature microRNA		-1	0.0402	BZW2,GATM,ONECUT2,SPP1
miR-1963 (miRNAs w/seed GGGACGA)	mature microRNA		-1	0.0314	CXXC5,MARCKSL1,SSX2IP,STMN4
ASXL1	transcription regulator		-1	0.00107	FAM162A,PGK1,RARRES2,VEGFA
miR-5617-3p (miRNAs w/seed AGGCGGC)	mature microRNA		-1	0.0412	LOXL1,PTTG1,SH3BGRL3,TSC22D1
miR-5625-5p (miRNAs w/seed CCGGAAG)	mature microRNA		-1	0.0263	APLP1,ELAVL3,S100A6,SOX8
COL5A1	other		-1	0.000594	LOXL1,PKM,S100A6,TF
SART1	other		-1	4.11e-06	DDIT4,HIF1A,SOX2,VEGFA	89 (7)
NFYA	transcription regulator		-1	5.03e-06	E2F1,EGR1,GADD45A,JUN,JUNB,PGK1,PKM,PTTG1	84 (8)
DKK1	growth factor		-1	0.00844	CCND1,SOX9,TBX3,TTYH1	98 (12)
HNF1B	transcription regulator		-1	0.00011	DUSP1,FZD5,GADD45A,ID1,ID3,ID4,LUM,PTF1A,S100A6
NTRK1	kinase		-1	5.05e-06	EGR1,FOS,GADD45A,NR4A1,TSC22D1	110 (20)
miR-7672-3p (miRNAs w/seed CGGCUGC)	mature microRNA		-1	0.0412	CCN1,KDM6B,NDUFA4L2,SH3BGRL3
miR-7066-3p (miRNAs w/seed CUACCCA)	mature microRNA		-1	0.049	CKB,MLLT11,S100A6,TPI1
miR-190a-3p (miRNAs w/seed UAUAUAU)	mature microRNA		-1	0.0263	ACKR3,PIK3R1,PTF1A,VEGFA
miR-6996-5p (miRNAs w/seed GCACAGG)	mature microRNA		-1	0.00562	ACKR3,ATP6V0B,CYB5A,GAL,RGS16,SMIM20,SORCS1,SOX4,TLE5
miR-7678-5p (miRNAs w/seed UACAAGG)	mature microRNA		-1	0.021	AP1S2,SH3BGRL3,SLC1A3,SPON2
Ccl2	cytokine		-1	0.00378	KDR,SOX2,SPP1,TBX3	111 (10)
GDF2	growth factor		-1.009	0.000907	BAMBI,FOS,HIF1A,ID1,ID3,SOX2,SPP1	147 (21)
ADCYAP1	other		-1.026	2.2e-06	CAMK4,DDHD1,EGR1,FOS,GAS1,ID3,LUM,MCAM,SLC1A3,ST18,TMSB10/TMSB4X,TSC22D1,TTYH1	134 (22)
TXNIP	other		-1.028	1.84e-08	CCND1,DDIT4,ENO1,GAPDH,HIF1A,LDHA,PGK1,TPI1,VEGFA	149 (20)
TFRC	transporter		-1.035	4.61e-07	BNIP3,DDIT4,FOS,FTL,GADD45A,JUN,LDHA,PFKFB3,SMAD2,SOX11,STC2
CAMK4	kinase		-1.037	1.1e-05	CAMK4,FBXW7,FOS,FOSB,JUN,JUNB	135 (20)
HES1	transcription regulator		-1.044	1.39e-09	ASCL1,CCK,DUSP1,E2F1,HES1,KDM6B,PAX6,PTF1A,RLBP1,SPP1	81 (7)
miR-137-3p (miRNAs w/seed UAUUGCU)	mature microRNA		-1.049	0.00494	B2M,CCNG2,CDK6,FNDC5,NEUROD4,NREP,RCOR2,VASH2,ZFP36L2
ZEB2	transcription regulator		-1.057	1.09e-06	CCND1,CDH2,CDK6,E2F1,GATM,ID4,MYB,VIM	130 (16)
F2	peptidase		-1.059	1.58e-09	BSG,CCN1,CCND1,CLIC1,DUSP1,EGR1,FOS,FOSB,HIF1A,IER2,JUN,JUNB,KDR,MGLL,MIF,RAB3A,TAGLN3,VEGFA	136 (19)
MKNK1	kinase		-1.062	1.04e-09	ATP1A3,CCN1,CELF4,CRMP1,EGR1,FOS,FOSB,MAP1B,NREP,PAX6,RAB3A,SMAD2,SPRY2,TF,VIM	110 (13)
miR-448-3p (and other miRNAs w/seed UGCAUAU)	mature microRNA		-1.066	2.92e-05	FABP7,GATM,NEUROD4,NREP,ODF2L,PTF1A,SPRY2,TMSB10/TMSB4X,VASH2
KDM4A	transcription regulator		-1.067	0.000119	CCND1,JPT1,SOX2,TTYH1
MAC	complex		-1.067	0.000331	EGR1,RGS16,SOX9,SPP1	143 (21)
MSX2	transcription regulator		-1.067	8.63e-05	CCND1,CDH2,EPHA4,SPP1,VIM	135 (26)
miR-143-5p (and other miRNAs w/seed GUGCAGU)	mature microRNA		-1.067	0.0217	HIF1A,JPT1,SSR4,TMEM37
TRPC1	ion channel		-1.067	0.000191	CCND1,CDK6,HIF1A,KDR	114 (14)
HDAC6	transcription regulator		-1.067	0.00177	HIF1A,JUN,JUNB,VIM	135 (24)
TLR3	transmembrane receptor		-1.067	0.0268	DUSP1,FOS,ID1,JUNB,NR4A1,PFKFB3,PIK3R1
miR-6751-5p (and other miRNAs w/seed UGGGGGU)	mature microRNA		-1.069	0.00582	BCL7A,ELAVL3,FOSB,ID3,LDHA,NHLH1,NOVA2,NR4A1,RAB3A,RAX,SCRT1,SORCS1,TLCD3B,ZNF385A
PARP1	enzyme		-1.08	0.0042	CCND1,E2F1,FOS,HES1,JUN,PARP1	143 (25)
EGLN1	enzyme		-1.09	1.27e-05	COL2A1,HES1,HIF1A,PGK1,SOX9,TPI1,VEGFA	127 (22)
PDGF-AA	complex		-1.091	0.000164	FOS,ID4,SOX2,VIM	150 (24)
ADRB3	G-protein coupled receptor		-1.091	8.31e-05	EGR1,FOS,JUN,JUNB	99 (24)
AGTR1	G-protein coupled receptor		-1.091	0.00164	CCND1,DUSP1,FOS,JUN	139 (24)
miR-6846-5p (and other miRNAs w/seed GGGGGCU)	mature microRNA		-1.091	0.000295	ASCL1,ATP1A3,BSG,CCNG2,CDK6,DNM1,ELAVL3,FABP7,FOSB,FSCN1,HES4,ISYNA1,JUNB,L1CAM,NOVA2,PTP4A3,RARRES2,RBFOX3,RNF165,SCRT1,ZNF385A
Pka	complex		-1.107	5.27e-08	CAMK4,CCK,CDH2,DUSP1,E2F1,EGR1,FOS,JUN,JUNB,NR4A1,SLC1A3,SOX9	104 (19)
MRTFA	transcription regulator		-1.108	0.000573	CCN1,CD24,EGR1,FOS,GADD45A,GAS1,ID1,NREP,SELENOP	87 (10)
GH1	growth factor		-1.108	8.79e-09	CDH2,DBI,EGR1,FOS,GADD45A,ID3,JUN,JUNB,MYB,PTMA,SPP1,VIM	116 (19)
PDK1	kinase		-1.109	0.000787	HIF1A,ID3,LDHA,PIK3R1,VIM	99 (7)
Esrra	ligand-dependent nuclear receptor		-1.109	0.00855	CRAT,ENO1,PYGL,SOX9,SPP1
Sox2ot	other		-1.117	3.6e-05	CDH2,FABP7,SOX2,VIM	73 (7)
RAC1	enzyme		-1.119	1.75e-07	CCND1,CDH2,COL2A1,DUSP1,FOS,HIF1A,HSPB1,JUN,SOX2,SOX9,VEGFA	131 (21)
FMR1	translation regulator		-1.126	0.000954	BASP1,CELF4,DNM1,ENO1,GAPDH,MAP1B,PFKP,RAB3A,TF
HNRNPU	transporter		-1.131	8.56e-05	ASCL1,DACH1,GAPDH,SOX8,SOX9,SPP1
miR-4660 (miRNAs w/seed GCAGCUC)	mature microRNA		-1.134	0.013	HES6,LDHA,LIMCH1,NR4A1,ORAI2,PFKFB3,PLXNA2
miR-4278 (miRNAs w/seed UAGGGGG)	mature microRNA		-1.134	0.0122	NEUROD4,NOVA2,PCBP4,RLBP1,SCRT1,SLC1A3,STC2
miR-4781-5p (miRNAs w/seed AGCGGGG)	mature microRNA		-1.134	0.00289	ISYNA1,PFKFB3,PODXL2,RAX,SCRT1,TLCD3B,TNNI1
miR-6354 (miRNAs w/seed GCCCUGG)	mature microRNA		-1.134	0.0442	FAM131C,FZD5,PCBP4,PFKFB3,RGS16,SCRT1,TMEM37
miR-6729-3p (miRNAs w/seed CAUCCCC)	mature microRNA		-1.134	0.00271	ARRB2,CLIC1,FOSB,LIMD2,NHLH1,STC2,THBS3
miR-7086-5p (miRNAs w/seed AGAGGAG)	mature microRNA		-1.134	0.0101	FNDC5,H4C3,LOXL1,NOVA2,RNF165,TAGLN3,TTYH1
miR-7653-5p (miRNAs w/seed AAGGGGC)	mature microRNA		-1.134	0.0101	DEK,FNDC5,LIMD2,NNAT,RGS16,SCRT1,TLE5
miR-6832-3p (miRNAs w/seed CCCUUUU)	mature microRNA		-1.134	0.000424	AP1S2,EGR1,ELAVL3,ONECUT2,SOX11,SOX4,TTYH1
miR-6734-3p (miRNAs w/seed CCUUCCC)	mature microRNA		-1.134	0.0429	DYNC1H1,FXYD1,GAS1,LIMD2,TBX3,TMSB10/TMSB4X,ZNF385D
miR-6859-3p (miRNAs w/seed GACCCCC)	mature microRNA		-1.134	0.0106	CDKN1C,FNDC5,HES4,PLP1,PPP1R14C,RNF165,S100A6
MMP1	peptidase		-1.135	0.000264	E2F1,FOS,HIF1A,JUN,KDR	128 (18)
miR-9-5p (and other miRNAs w/seed CUUUGGU)	mature microRNA		-1.151	0.0404	AP1S2,LUM,ONECUT2,PFKFB3,PGK1,PKM,REST
SPZ1	transcription regulator		-1.152	7.05e-08	CCND1,CDH2,E2F1,HIF1A,VEGFA,VIM	82 (5)
P2RY2	G-protein coupled receptor		-1.154	0.000221	CCND1,HIF1A,JUN,TF	107 (16)
BRD4	kinase		-1.154	0.00299	CCND1,FOS,GADD45A,LOXL1,MYB,SPP1,STC2	129 (19)
HIF1AN	enzyme		-1.165	0.000254	HIF1A,LDHA,SOX9,VEGFA	136 (16)
REST	transcription regulator		-1.165	0.000478	ASCL1,INA,L1CAM,NRXN3,RAB3A,REST,SCG3,STMN2
Tgf beta	group		-1.17	2.7e-16	ASCL1,BAMBI,BASP1,BNIP3,CCN1,CCND1,CDH2,CDK6,FOS,FSCN1,HES1,HES6,HIF1A,ID1,ID3,ID4,JUN,JUNB,KDM6B,LDHA,LOXL1,MIF,NEUROD4,NHLH1,NR4A1,PGK1,PTF1A,SMAD2,SOX4,SPP1,VEGFA,VIM	158 (22)
HDAC2	transcription regulator		-1.172	0.000406	CCND1,CCNG2,COL2A1,E2F1,EGR1,SOX11,SOX9,STMN2	151 (21)
TCF12	transcription regulator		-1.172	0.0186	ID3,JUN,LDHA,VEGFA,VIPR2
ILF3	transcription regulator		-1.185	0.0176	CD9,FABP5,FOS,MGLL
RBPJ	transcription regulator		-1.187	3.7e-07	ASCL1,DUSP1,EPHA4,FOS,HES1,JUN,KDR,NHLH1,NR4A1,SOX2,SOX4,SOX9,VEGFA	131 (22)
CCN2	growth factor		-1.194	3.42e-08	CCND1,COL2A1,EGR1,ENO1,HES1,HIF1A,JUN,LOXL1,SOX2,SOX4,VEGFA	149 (21)
WBP2	transcription regulator		-1.195	0.000734	EGR1,ISYNA1,JUN,RARRES2,SLC16A3,SLC1A3,SOX4
miR-1226-5p (and other miRNAs w/seed UGAGGGC)	mature microRNA		-1.195	0.025	GADD45A,MLLT11,MSRB1,PCSK1N,PRSS35,SFRP2,TBX3
HAS2	enzyme		-1.199	0.000119	CDH2,DNAJB1,VEGFA,VIM	74 (7)
KDM3A	transcription regulator		-1.21	0.00107	CCN1,CCND1,CD9,MCAM
SPP1	cytokine		-1.213	6.26e-08	CCND1,CD9,CDH2,E2F1,FOS,JUN,PIK3R1,PTF1A,S100A6,SOX8,SOX9,SPP1,VEGFA,VIM	135 (22)
GAST	other		-1.217	4.23e-06	CCND1,EGR1,FOS,HES1,JUN,PGK1,PIK3R1,S100A6	135 (23)
LIN28B	other		-1.219	4.33e-07	CDH2,COL2A1,E2F1,SMAD2,SOX11,SOX2,SOX9,VIM	74 (7)
PDGFC	growth factor		-1.225	9.97e-05	CCND1,KDR,NR4A1,VEGFA	132 (18)
MTDH	transcription regulator		-1.23	0.000242	CDH2,CDKN1C,HIF1A,SPP1,VIM	156 (21)
MEF2D	transcription regulator		-1.23	1.65e-06	CCND1,FOS,FOSB,JUN,JUNB,NR4A1,TNNI1,VIM	94 (13)
Meg3	other		-1.233	2.64e-06	HES1,LDHA,PKM,VEGFA	107 (7)
MEMO1	other		-1.236	1.6e-06	CCND1,FOS,JUN,STC2	141 (22)
cytokine	group		-1.238	0.00029	CCN1,CCND1,DUSP1,EGR1,FOS,HIF1A,IGFBP2,JUN	142 (22)
PTHLH	other		-1.242	0.00195	CCND1,COL2A1,FOS,SOX9,VEGFA	132 (25)
CCND1	transcription regulator		-1.245	3.32e-08	CCND1,CDK6,E2F1,ENO1,HSPB1,ID1,ID3,JPT1,KDM6B,MYBL1,PCLAF,PDLIM4,SOX11,SOX2,SOX4,SPP1,TPI1,TUBA1B	140 (19)
THPO	cytokine		-1.253	0.00522	CCND1,FOS,KDR,SOX2,VEGFA	125 (22)
MIR17HG	other		-1.254	0.000445	CCND1,CLIC1,HIF1A,REST,SOX11,SOX4,TBX3	104 (7)
RHOA	enzyme		-1.262	0.0305	CCND1,FOS,JUN,SOX9
IL10RA	transmembrane receptor		-1.265	0.00229	BNIP3,CCN1,DDHD1,DDIT4,FABP5,LUM,MSRB1,MYB,PYGL,SLC16A3
SORL1	transporter		-1.265	2.27e-05	B2M,COL2A1,EPHA4,FOS,FZD5,GAL,NRXN3,RARRES2,VEGFA,VIPR2
miR-6827-5p (miRNAs w/seed GGGAGCC)	mature microRNA		-1.265	0.00952	APBA2,DNM1,HMGN2,MCAM,PPP1R14B,RBFOX3,SPON2,STC2,THBS3,TTYH1
GRP	growth factor		-1.265	1.35e-05	CCND1,FOS,FOSB,JUN,VEGFA	136 (22)
Gsk3	group		-1.284	8.22e-11	CCND1,COL2A1,FOS,FOSB,FSCN1,HIF1A,JUN,KDR,MYB,NNAT,NR4A1,SPP1	121 (19)
FOXM1	transcription regulator		-1.289	3.02e-06	CCND1,CDH2,FOS,JUN,KDR,LDHA,PGK1,PTTG1,SOX2,VEGFA,VIM	142 (20)
Insulin	group		-1.297	4.91e-11	CA14,CCK,CCND1,CCNG2,CRAT,CYB5A,DBI,DDIT4,DUSP1,EGR1,FOS,FOSB,FTL,GAPDH,HES1,HIF1A,IGFBP2,JUN,JUNB,LDHA,MIF,NR4A1,PFKFB3,PGK1,PIK3R1,PKM,RARRES2,SELENOP,TF,VEGFA,VIM	154 (20)
NR5A2	ligand-dependent nuclear receptor		-1.298	0.000589	CCND1,FOS,GADD45G,GATM,JUN,JUNB,NR4A1	147 (20)
CAV1	transmembrane receptor		-1.299	0.000316	CCND1,EGR1,FOS,ID1,KDR,NR4A1,SOX2,VIM	148 (22)
NOTCH3	transcription regulator		-1.3	0.000186	CDKN1C,FABP7,HES1,ID1,KDR,VEGFA	75 (9)
AGT	growth factor		-1.307	2.07e-11	BSG,CCND1,CDKN1C,CREB5,DUSP1,E2F1,EGR1,ETV5,FOS,HES1,HIF1A,HSPB1,ID3,IGFBP2,JUN,KDR,L1CAM,LIMD2,LOXL1,LUM,MIF,MYB,MYBL1,NR4A1,NREP,PARP1,PIK3R1,PTF1A,SFRP2,SMAD2,SOX4,SPP1,SPRY2,STC2,VEGFA,VIM,WIF1	173 (22)
MAPK7	kinase		-1.332	4.25e-07	CCN1,CCND1,CDH2,DUSP1,ID1,JUN,NR4A1,VEGFA,VIM	138 (26)
BMP2	growth factor		-1.334	7.15e-12	ASCL1,BSG,CAMK4,CCND1,COL2A1,CRYM,FOS,FOSB,ID1,ID3,ID4,JUN,JUNB,L1CAM,PLXNA2,SOX2,SOX9,SPP1,VEGFA	128 (25)
Pkg	group		-1.342	4.04e-06	EGR1,FOS,FOSB,JUN,SOX9	146 (24)
NORAD	other		-1.342	7.67e-05	BASP1,CCN1,ID3,JUN,JUNB	75 (7)
Ifn	group		-1.342	0.0108	B2M,FOS,HIF1A,IFITM3,SPP1
miR-4710 (miRNAs w/seed GGUGAGG)	mature microRNA		-1.342	0.03	CCK,DUSP26,SLC16A3,SMIM20,VASH2
miR-3102-5p.2-5p (miRNAs w/seed GUGGUGC)	mature microRNA		-1.342	0.00185	LIMD2,MLLT11,NNAT,TAGLN3,ZFP36L2
miR-1952 (miRNAs w/seed CUCCACC)	mature microRNA		-1.342	0.0196	ATP1A3,DDIT4,HES6,ORAI2,TF
miR-4639-3p (and other miRNAs w/seed CACUCUC)	mature microRNA		-1.342	0.0367	DUSP26,FBXW7,GPC2,PRDM13,TSC22D1
miR-4642 (miRNAs w/seed UGGCAUC)	mature microRNA		-1.342	0.0148	CHRNA3,GADD45A,HES1,HIF1A,HILPDA
miR-4678 (miRNAs w/seed AGGUAUU)	mature microRNA		-1.342	0.00279	BZW2,DUSP1,GADD45A,PFKFB3,PFKP
miR-6075 (miRNAs w/seed CGGCCCA)	mature microRNA		-1.342	0.0162	HOMER3,PFKFB3,PTMS,RAB3A,RAX
MNT	transcription regulator		-1.342	0.000404	BNIP3,CCNG2,ID1,LDHA,PGK1
miR-7212-3p (miRNAs w/seed AACACAC)	mature microRNA		-1.342	0.0166	BNIP3,FAM131C,MCAM,PPP1R14C,SLCO5A1
miR-6853-5p (miRNAs w/seed GCGUGGG)	mature microRNA		-1.342	0.0391	FXYD1,NDUFA4L2,PDLIM4,PFKFB3,SOX4
miR-212-5p (miRNAs w/seed CCUUGGC)	mature microRNA		-1.353	0.00719	BASP1,CCN1,FNDC5,INA,MIR124-1HG,RAX,SLC16A3,STMN4,TLCD3B,TMEM37
GDNF	growth factor		-1.36	0.000128	CCND1,EGR1,ETV5,FOSB,NNAT,PAX6	105 (19)
ATF2	transcription regulator		-1.36	7.23e-05	CCND1,DUSP1,EGR1,FOS,GADD45A,JUN,TF	143 (20)
BMP7	growth factor		-1.364	4.53e-08	CDH2,CXXC5,DUSP1,DYNC1H1,HSPB1,ID1,ID3,INA,LOXL1,PAX6,PIK3R1,SMAD2,SPP1,VEGFA,VIM	107 (15)
miR-466d-5p (and other miRNAs w/seed GUGUGUG)	mature microRNA		-1.364	0.0106	APBA2,ASCL1,BARHL2,BAZ2B,CCND1,CDK6,ELAVL3,HMGN2,KIF1A,L1CAM,LUM,NR2E1,NRXN3,ONECUT2,ORAI2,PLP1,RUNX1T1,SLC25A6,SLCO3A1,SMIM20,ST18,TFAP2B,TNNI1,VIPR2
Mapk	group		-1.377	0.000183	CCND1,EGR1,FOS,JUN,JUNB,SPP1,VEGFA	126 (23)
EP300	transcription regulator		-1.385	3.19e-13	B2M,CAMK4,CCND1,CCNG2,CKB,COL2A1,DUSP1,E2F1,EGR1,FOS,HES6,ID1,ID3,JUN,KDR,LDHA,NR4A1,PARP1,PDLIM4,PFKFB3,PGK1,PKM,PTPRF,RBP1,SLC16A3,SOX2,VEGFA,ZFP36L2	144 (20)
BCL6	transcription regulator		-1.387	0.0161	CCND1,COL2A1,GADD45A,JUNB,MYB,PRSS23,SOX9
miR-7669-3p (and other miRNAs w/seed AGCUGGG)	mature microRNA		-1.387	0.0293	APLP1,ENO1,GPI,NNAT,SFRP2
RUNX2	transcription regulator		-1.388	0.000513	CCND1,CDH2,HIF1A,LUM,SOX9,SPP1,VEGFA	154 (24)
ADRB	group		-1.394	4.61e-07	BNIP3,CCND1,CDK6,DDIT4,E2F1,FOS,GADD45A,JUN,JUNB,NR4A1,SLC6A9	126 (21)
miR-637 (and other miRNAs w/seed CUGGGGG)	mature microRNA		-1.397	0.0156	BCL7A,ELAVL3,FOSB,GPI,HES4,KIF1A,L1CAM,MIDN,NHLH1,NNAT,NOVA2,NR4A1,PTMS,RAB3A,RARRES2,RAX,SCRT1,SH3BGRL3,TLE5
MET	kinase		-1.4	5.05e-09	CCND1,CDH2,FOS,HSPB1,JUN,NREP,ONECUT2,SLCO3A1,SOX2,SPP1,TSC22D1,VEGFA,VIM	129 (19)
OSM	cytokine		-1.404	2.02e-09	B2M,BAMBI,CCND1,CCNG2,CD24,CDH2,COL2A1,EGR1,ETFB,FOS,FOSB,GADD45G,HIF1A,ID1,JUN,JUNB,MGLL,MLLT11,PFKFB3,PGK1,PYGL,SFRP2,SLC16A3,SPP1,VEGFA,VIM	125 (20)
miR-4667-3p (miRNAs w/seed CCCUCCU)	mature microRNA		-1.414	0.0489	ARRB2,BARHL2,FXYD1,GPC2,JUN,NNAT,TNNI1,ZNF385D
miR-1894-5p (miRNAs w/seed UCUCCCC)	mature microRNA		-1.414	0.0146	BASP1,CYB5A,FNDC5,MYO10,PFKFB3,RGS16,SOX11,TLE5
miR-3150b-3p (and other miRNAs w/seed GAGGAGA)	mature microRNA		-1.414	0.00968	ASCL1,ATP1A3,BASP1,IER2,NDUFA4L2,NOVA2,SH3BGRL3,TAGLN3
miR-3552 (miRNAs w/seed GGCUGCA)	mature microRNA		-1.414	0.0126	APBA2,CCK,DDIT4,GAS1,GATB,MSRB1,RNF165,SETBP1
miR-5008-5p (miRNAs w/seed GAGGCCC)	mature microRNA		-1.414	0.0314	APCDD1L,FOS,NDUFA4L2,NHLH1,ORAI2,PFKFB3,SOX8,TNNI1
miR-451b (miRNAs w/seed GGGAGCA)	mature microRNA		-1.414	0.0172	FOSB,NDUFA4L2,NNAT,NREP,RAX,TLCD3B,TPI1,VASH2
miR-4731-5p (miRNAs w/seed GCUGGGG)	mature microRNA		-1.414	0.00189	FAM131C,FOSB,GAPDH,HES4,L1CAM,MCAM,MIDN,NHLH1,ORAI2,PTMS,PTPRF,QDPR,RARRES2,RNF165,SFRP2,SH3BGRL3,SLC6A9,VAX2
TCR	complex		-1.425	3.73e-08	BSG,CCND1,EGR1,ENO1,ETV5,FOS,GADD45G,HIF1A,ID3,JUN,JUNB,NR4A1,PGK1,PIK3R1,SCARB2,SPP1,TLE3,TPI1,TSC22D1	118 (23)
AREG	growth factor		-1.452	0.00308	BSG,CCND1,EGR1,FOS,JUN	102 (19)
SERPINE1	other		-1.452	0.000648	DUSP1,EGR1,FOS,JUNB,SPON2,VIM	151 (24)
FGFR2	kinase		-1.452	0.00351	CCND1,HES1,NNAT,PLP1,SOX2,SPP1	136 (22)
EWSR1	other		-1.452	4.62e-05	ACKR3,CCND1,FOS,GAS1,PCLAF	96 (7)
miR-5129-5p (and other miRNAs w/seed UGUGGGG)	mature microRNA		-1.462	0.00107	BARHL2,CHRNA3,ELAVL3,ISYNA1,LHX2,MGLL,MOB3B,NOVA2,PCSK1N,PFKFB3,RNF165,SCRN1,SCRT1,SPON2,TLE5,TNNI1,VSX2,ZFP36L1
TREM1	transmembrane receptor		-1.463	0.00149	ACKR3,EGR1,HES1,HES4,RGS16,SLC1A3,SPP1,SPRY2	112 (14)
EGR3	transcription regulator		-1.477	0.0314	ID3,JUN,MYB,SOX9,TSC22D1
MAPK8	kinase		-1.478	0.000183	CCND1,CDH2,DUSP1,EGR1,FOS,GADD45A,JUN,MIF,RBP1	87 (17)
REL	transcription regulator		-1.48	0.00035	B2M,CCND1,ETV5,FOS,JUN,KDR,NR4A1,PCBP4,PPP1R14B,VIM	144 (23)
JUN	transcription regulator		-1.48	9.36e-07	CCN1,CCND1,CDH2,DUSP1,FABP7,FOS,GADD45A,HES1,IGFBP2,JUN,JUNB,KDR,MYB,NR4A1,SOX2,SPP1,TF,VEGFA,VIM,ZNF385A	150 (23)
ID1	transcription regulator		-1.499	1.82e-05	CCND1,E2F1,EGR1,REST,SOX2,TF,VIM	145 (23)
LIF	cytokine		-1.501	3.41e-08	CCND1,CD9,E2F1,EGR1,FOS,GAL,HES1,HIF1A,JUN,JUNB,KDR,PAX6,SOX2,SPP1,VEGFA	119 (23)
CCN1	other		-1.504	5.17e-07	CCN1,CCND1,HIF1A,JUN,KDR,MIF,NR4A1,VEGFA,WIF1	136 (19)
ETS1	transcription regulator		-1.505	1.07e-05	CCND1,CDH2,CDK6,COL2A1,EGR1,JUNB,MCAM,MYB,PARP1,SPP1,VEGFA,VIM	155 (26)
miR-7045-3p (miRNAs w/seed CUCCCCC)	mature microRNA		-1.508	0.00191	BARHL2,DDIT4,EGR1,GAPDH,HSPB1,MYO10,NNAT,RCOR2,SOX11,TLE5,ZNF385A
miR-7082-3p (miRNAs w/seed CCCCCCU)	mature microRNA		-1.508	5.75e-05	BARHL2,JUN,LIMD2,MIDN,NNAT,NREP,STC2,STON2,TBX3,TLE5,ZNF385A
RORC	ligand-dependent nuclear receptor		-1.51	0.00149	ENO1,GPI,HIF1A,LDHA,PGK1,PKM,TPI1,VEGFA	89 (7)
GNRH	group		-1.513	5.28e-05	DUSP1,EGR1,FOS,JUN,SCG3	114 (18)
SREBF2	transcription regulator		-1.534	8.92e-06	CCN1,CYB5A,DBI,E2F1,FABP5,FABP7,HES6,RARRES2	14 (2)
SP1	transcription regulator		-1.542	1.53e-10	BSG,CCND1,CCNG2,CDH2,CDK6,CHRNA3,CKB,COL2A1,DNM1,E2F1,EGR1,FOS,HIF1A,ID4,IFITM3,JUN,KDR,MYBL1,PARP1,PGK1,PKM,PTTG1,RLBP1,SMAD2,SOX9,SPP1,VEGFA,VIM	151 (23)
ICAM1	transmembrane receptor		-1.543	0.000373	CDH2,FOS,HES1,VEGFA,VIM	129 (19)
PSEN1	peptidase		-1.543	4e-14	ATP1A3,BASP1,BSG,CCND1,CD9,CDH2,CKB,CRYM,DBI,DUSP1,EGR1,ENO1,FBXW7,FOS,GAPDH,GPM6B,HES1,L1CAM,NNAT,PGK1,PIK3R1,PKM,PTPRF,QDPR,STMN2,TPI1,TUBA1B	158 (23)
SNAI2	transcription regulator		-1.548	2.87e-10	BSG,CCN1,CCND1,CDH2,COL2A1,HES6,ID4,L1CAM,SOX2,SOX9,TNNI1,VIM	142 (25)
FGF2	growth factor		-1.551	6.37e-21	ASCL1,B2M,BAMBI,BNIP3,CCK,CCN1,CCND1,CCNG2,EGR1,ENO1,EPHA4,ETV5,FOS,GADD45A,GAL,HES1,HIF1A,ID3,IGFBP2,JUN,JUNB,KDR,MCAM,MIF,NR4A1,PAX6,PGK1,PTF1A,PTTG1,REST,SFRP2,SOX2,SOX9,SPP1,SPRY2,TF,VEGFA,VIM	159 (21)
miR-128-1-5p (and other miRNAs w/seed GGGGCCG)	mature microRNA		-1.554	0.0287	CELF3,ELAVL3,HES4,LGI4,LIMD2,NNAT,PODXL2,PTP4A3,RAX,RBFOX3,SCRT1
miR-504-3p (and other miRNAs w/seed GGGAGAG)	mature microRNA		-1.571	0.00118	ATP1A3,CELF3,FAM131C,FOSB,H4C3,MARCKSL1,MLLT11,MOB3B,NHLH1,NOVA2,PTMS,RARRES2,RNF165,SH3BGRL3,TLE3,TLE4,TLE5,TNNI1,TPI1,TTYH1,ZNF385A
MEF2C	transcription regulator		-1.572	3.5e-07	CKB,COL2A1,FABP7,FOS,FOSB,JUN,JUNB,NR4A1,PLP1,SFRP2,TNNI1,VIM	118 (19)
miR-22-3p (miRNAs w/seed AGCUGCC)	mature microRNA		-1.584	0.0389	APCDD1L,CCN1,DDIT4,DUSP26,ENO1,FTL,GATM,ORAI2,PTTG1
CG	complex		-1.591	7.72e-17	B2M,BAMBI,CAMK4,CCND1,CD24,CDH2,CREB5,DBI,DUSP1,E2F1,EGR1,FABP5,FOS,GAL,GAS1,HIF1A,HILPDA,IGFBP2,JUN,JUNB,LGR4,LIMCH1,LRRN3,MCAM,NR4A1,PFKFB3,PPP1R14A,S100A6,SELENOP,SFRP2,SMAD2,SPP1,SPRY2,SSX2IP,VEGFA	135 (22)
SOX2	transcription regulator		-1.598	3.64e-10	ACKR3,ASCL1,CCND1,CD9,CDH2,DUSP1,ETV5,FABP7,FOS,ID3,JUN,KDR,LHX2,OTX2,PAX6,PIK3R1,PLP1,SOX2,SOX8,SPP1,TBX3,TF,TNNI1,VEGFA,VIM	135 (21)
HGF	growth factor		-1.599	1.38e-11	ACKR3,CCN1,CCND1,CCNG2,COL2A1,DUSP1,EGR1,EPHA4,FOS,FOSB,HES1,ID1,JUN,JUNB,L1CAM,LDHA,NR4A1,PGK1,PLXNA2,PTPRF,PTTG1,RARRES2,SOX2,SPP1,SPRY2,VEGFA,VIM	129 (20)
PDGFB	growth factor		-1.604	0.00011	CCND1,EGR1,FOS,NR4A1,SPP1,VEGFA	102 (21)
miR-6909-5p (miRNAs w/seed AGGGGGG)	mature microRNA		-1.606	3.38e-07	CCN1,DNM1,DPYSL4,DUSP1,FTL,FZD5,KIF1A,LOXL1,MGLL,MOB3B,MSRB1,NOVA2,ONECUT2,SEZ6L2,SOX2,SOX4,SPRY2,TBX3,TLE3
SHH	peptidase		-1.61	1.05e-05	ASCL1,CCND1,CCNG2,HIF1A,ID1,NR4A1,OTX2,PAX6,SFRP2,SOX9,SPP1	132 (25)
HMGA1	transcription regulator		-1.623	1.35e-07	B2M,CCN1,CCND1,DPYSL4,EGR1,FOS,ID3,IER2,JUNB,SOX2,SOX4,TFAP2C,VIM	154 (25)
RGS2	enzyme		-1.633	0.000722	GAPDH,PDLIM4,RARRES2,SLC16A3,SPP1,SSR4
miR-129-1-3p (and other miRNAs w/seed AGCCCUU)	mature microRNA		-1.633	0.0456	CA14,FNDC5,HILPDA,PARP1,RGS16,SOX4
miR-331-5p (and other miRNAs w/seed UAGGUAU)	mature microRNA		-1.633	0.00943	ARRB2,CCNG2,GATM,LGR4,PFKFB3,PFKP
miR-3194-5p (miRNAs w/seed GCCAGCC)	mature microRNA		-1.633	0.0199	B2M,DUSP26,ORAI2,PTP4A3,RNF165,TMSB10/TMSB4X
miR-3076-5p (miRNAs w/seed ACAGGGG)	mature microRNA		-1.633	0.048	ETV5,MARCKSL1,MSRB1,NHLH1,PCBP4,TPI1
miR-3073a-5p (and other miRNAs w/seed UGGUCAC)	mature microRNA		-1.633	0.014	AP1S2,ID4,LIMD2,PTMA,SH3BGRL3,VAX2
miR-1539 (miRNAs w/seed CCUGCGC)	mature microRNA		-1.633	0.0015	BCL7A,CCDC85B,COL2A1,CYB5A,NNAT,STMN2
miR-3650 (miRNAs w/seed GGUGUGU)	mature microRNA		-1.633	0.014	BASP1,BZW2,NR2E1,SLC25A6,TMSB10/TMSB4X,VEGFA
miR-4258 (miRNAs w/seed CCCGCCA)	mature microRNA		-1.633	0.0108	FSCN1,FXYD1,NNAT,ORAI2,RNF165,SCRN1
miR-3080-5p (and other miRNAs w/seed GAAGCGC)	mature microRNA		-1.633	0.00794	DDIT4,FOSB,NREP,PHC2,PTMS,ZNF385A
TFAM	transcription regulator		-1.633	0.000319	CRMP1,FABP5,LDHA,PFKP,PGK1,PKM
miR-6738-3p (miRNAs w/seed UUCUGCC)	mature microRNA		-1.633	0.00749	CCK,CCNG2,HES6,IGFBP2,MYBL1,PCBP4
miR-6900-3p (miRNAs w/seed GGUGAUG)	mature microRNA		-1.633	0.0108	AP1S2,B2M,NNAT,ONECUT2,PFKP,VAX2
miR-6850-3p (miRNAs w/seed CCGGCCG)	mature microRNA		-1.633	0.000889	BSG,FZD5,ORAI2,PDLIM4,PFKFB3,SCRT1
miR-6933-3p (miRNAs w/seed GGUGUUU)	mature microRNA		-1.633	0.0108	FNDC5,H4C3,MLLT11,NKD2,NREP,VIPR2
miR-6995-5p (miRNAs w/seed UGGGAGU)	mature microRNA		-1.633	0.00108	ASCL1,DYNC1H1,MARCKSL1,STMN2,TPI1,VASH2
miR-6828-5p (miRNAs w/seed GGAAGCA)	mature microRNA		-1.633	0.0158	APCDD1L,ASCL1,NHLH1,PCBP4,RBFOX3,SSR4
EPO	cytokine		-1.647	1.92e-10	B2M,BZW2,CCNG2,CLIC1,EGR1,FABP5,FOS,FOSB,GAPDH,HMGN2,ID1,JUN,JUNB,MYB,PAX6,SPP1,TF,TFAP2C,TPI1,VEGFA	115 (21)
miR-1909-3p (and other miRNAs w/seed GCAGGGG)	mature microRNA		-1.648	0.00249	ACKR3,APCDD1L,ATP6V0B,ELAVL3,ETV5,FAM131C,FBXW7,FOSB,FSCN1,HES4,HSPB1,LIMD2,MARCKSL1,MIDN,MSRB1,PPP1R14B,RAB3A,SH3BGRL3,SOX8,STMN2,TLE5,TTYH1
FGF1	growth factor		-1.655	1.22e-05	CCN1,CCND1,EGR1,FOS,GADD45G,JUN,SOX2,SPP1,VEGFA	133 (23)
PLAU	peptidase		-1.665	0.000128	CCN1,CCND1,CDH2,IGFBP2,KDR,VIM	125 (20)
miR-4779 (miRNAs w/seed AGGAGGG)	mature microRNA		-1.667	0.0283	FAM131C,FOSB,HES4,HES6,MIDN,NOVA2,RAB3A,RNF165,SCRT1
miR-1306-5p (miRNAs w/seed CACCUCC)	mature microRNA		-1.667	0.00857	CCND1,DDIT4,ELAVL3,GAPDH,NHLH1,SCRN1,STC2,STMN4,TMEM37
miR-6727-5p (miRNAs w/seed UCGGGGC)	mature microRNA		-1.667	0.000183	CDKN1C,MCAM,NNAT,NRXN3,PFKFB3,PODXL2,RAX,SCRT1,STC2
MAP2K1	kinase		-1.67	2.83e-07	CCN1,CCND1,DUSP1,E2F1,EGR1,ENO1,ETV5,FOS,HIF1A,JUN,PLP1,SMAD2,SOX9,VEGFA	141 (23)
MAP3K1	kinase		-1.672	2.49e-05	CCND1,DUSP1,EGR1,FOS,HSPB1,JUN	143 (19)
Akt	group		-1.676	2.07e-08	CCND1,CDH2,CDKN1C,COL2A1,FOS,GPM6B,HES1,HIF1A,IGFBP2,JUN,L1CAM,MCAM,MYB,PTPRF,SOX2,SOX4,SOX9,SPP1,VEGFA,VIM	134 (19)
miR-1249-5p (and other miRNAs w/seed GGAGGGA)	mature microRNA		-1.679	0.00238	AP1S2,CRMP1,DNM1,E2F1,FAM131C,FOSB,FSCN1,FTL,GAS1,GPI,HES6,HSPB1,IFITM3,MGLL,MOB3B,NHLH1,NOVA2,NR4A1,PTMS,RNF165,SCRT1,SH3BGRL3,SORCS1,STON2,TNNI1,ZFP36L1,ZNF385A
miR-138-5p (miRNAs w/seed GCUGGUG)	mature microRNA		-1.69	0.0182	CREB5,DEK,HOMER3,IGFBP2,INA,KDM6B,NDUFA4L2,NKD2,NNAT,SETBP1,SOX4,VIM,ZFP36L2,ZNF385A
miR-6732-5p (and other miRNAs w/seed AGGGGGU)	mature microRNA		-1.691	0.00014	APBA2,CLIC1,DPYSL4,ELAVL3,FAM131C,FOSB,FZD5,JUNB,LIMD2,MARCKSL1,NDUFA4L2,NOVA2,PCBP4,SCRT1,SLC1A3,SOX4,TLE3,ZFP36L1,ZNF385A
LEP	growth factor		-1.691	1.22e-08	CCK,CCN1,CCND1,COL2A1,CYB5A,EGR1,ENO1,FOS,GADD45A,GAL,GAPDH,HES1,HIF1A,IGFBP2,JUN,JUNB,KDR,PLP1,SELENOP,SPP1,TPI1,VEGFA,VIM	151 (17)
FGF7	growth factor		-1.698	0.0002	CCND1,ETV5,FABP5,SMAD2,SPRY2,VEGFA	114 (21)
Pdgf (complex)	complex		-1.704	1.52e-06	CCND1,CDK6,EGR1,FOS,FOSB,HIF1A,JUN,JUNB,VEGFA	106 (21)
TFEB	transcription regulator		-1.705	0.000512	ATP6V0B,CCND1,FAM111A,FOS,HIF1A,JUN,PTTG1,SLC1A3,SPP1,VEGFA,VIM	136 (14)
miR-1900 (and other miRNAs w/seed GCCGCCC)	mature microRNA		-1.706	0.00336	ARRB2,BSG,FXYD1,JUN,NDUFA4L2,NNAT,PKM,SCRT1,SOX4
IRS1	enzyme		-1.709	3.25e-05	CCND1,EGR1,FOS,PIK3R1,PTPRF,SFRP2,SPP1,TNNI1,VEGFA	111 (23)
HRAS	enzyme		-1.713	5.93e-14	ASCL1,ATP1A3,B2M,BNIP3,CCN1,CCND1,CD24,COL2A1,CXXC5,DUSP1,E2F1,EGR1,ETV5,FOS,FOSB,GADD45G,HES1,HIF1A,HSPB1,JUN,JUNB,LOXL1,MCAM,MSRB1,NNAT,PRSS23,SOX4,SPP1,SPRY2,ST18,TBX3,TMSB10/TMSB4X,TSC22D1,VEGFA,VIM	150 (22)
CREBBP	transcription regulator		-1.732	1.1e-05	B2M,CAMK4,CCN1,CCND1,CKB,COL2A1,DUSP1,EGR1,FOS,FOSB,JUN,NR4A1,PDLIM4,PTPRF,VEGFA,ZFP36L2	146 (24)
NGF	growth factor		-1.74	1.22e-11	ASCL1,BAMBI,CCND1,DUSP1,EGR1,EPHA4,ETV5,FOS,GADD45A,GADD45G,GAL,ID1,ID3,IER2,JUN,JUNB,NR4A1,PARP1,STMN4,VEGFA	141 (20)
SNAI1	transcription regulator		-1.75	2.71e-07	CCN1,CCND1,CDH2,COL2A1,FOS,ID1,ID4,L1CAM,PFKP,SOX2,TF,VIM	164 (28)
CDK4/6	group		-1.757	8.13e-08	CCND1,CDK6,E2F1,ENO1,HSPB1,JPT1,PDLIM4,TPI1,TUBA1B
TCF3	transcription regulator		-1.761	0.00229	CDK6,GADD45A,ID3,JUN,LDHA,PFKP,PGK1,RGS16,SELENOP,TF,VEGFA,VIPR2
miR-218-5p (and other miRNAs w/seed UGUGCUU)	mature microRNA		-1.8	0.0137	AP1S2,LGR4,ONECUT2,PARP1,SCRT1,SETBP1,TNNI1,VASH2,VIM
miR-4716-3p (and other miRNAs w/seed AGGGGGA)	mature microRNA		-1.807	0.00227	ELAVL3,FAM131C,FOSB,FXYD1,HES4,NOVA2,ONECUT2,PCBP4,PHC2,RLBP1,RNF165,SCRT1,SOX4,STC2,TLCD3B
VDR	transcription regulator		-1.808	0.00017	CCND1,EGR1,GADD45A,GADD45G,ID1,JUN,MEG3,PTPRF,SPP1,SSX2IP,VEGFA	135 (19)
MAPK3	kinase		-1.816	2.31e-07	CCND1,E2F1,EGR1,FOS,FOSB,JUN,JUNB,NR4A1,SPP1,VEGFA	113 (20)
NTRK2	kinase		-1.823	1.95e-08	CCND1,E2F1,EGR1,FOS,PIK3R1,RAB3A,SOX9,SPP1,VEGFA,VIM	133 (24)
Vegf	group		-1.824	6.87e-05	ACKR3,CCN1,EGR1,EPHA4,ETV5,FOS,FOSB,HES1,HIF1A,ID1,JUN,KDR,MIF,NR4A1,PLXNA2,VEGFA,VIM	137 (22)
miR-4667-5p (and other miRNAs w/seed CUGGGGA)	mature microRNA		-1.846	0.106	BCL7A,ELAVL3,FOSB,HES4,MIDN,MLLT11,NHLH1,NNAT,NOVA2,PTMS,PTPRF,RARRES2,RAX,SLC6A9,TSC22D1
POMC	other		-1.862	0.000802	DUSP1,FOS,GAPDH,JUN,JUNB,NR4A1	106 (21)
FGF8	growth factor		-1.867	0.00058	CCND1,ETV5,OTX2,PAX6,SPP1,SPRY2	71 (12)
MYB	transcription regulator		-1.876	6.38e-06	CCND1,CDH2,HIF1A,JUN,KDR,MYB,PAX6,SLC16A3,SOX2,SPP1,VIM	143 (20)
IL1A	cytokine		-1.883	0.000465	CCN1,FOS,FOSB,JUN,JUNB,LDHA,MCAM,SPP1,TOX3,VIM	126 (16)
APP	other		-1.885	9.12e-20	APBA2,ASCL1,ATP1A3,BASP1,BSG,CCND1,CCNG2,CDH2,CDK6,CHD4,CKB,CLIC1,CRYM,DBI,DNM1,EGR1,ENO1,FBXW7,FOS,FOSB,FXYD1,GAPDH,GPI,GPM6B,HES1,HSPB1,IGFBP2,INA,JUN,JUNB,L1CAM,LDHA,MAP1B,NNAT,PAX6,PFKFB3,PFKP,PGK1,PIK3R1,PKM,QDPR,REST,RUNX1T1,SOX9,STMN2,TLE5,TPI1,TUBA1B,VEGFA,ZFP36L1	144 (16)
PRKCE	kinase		-1.886	2.22e-06	CCN1,CCND1,E2F1,EGR1,FOS,JUN,JUNB,VEGFA	119 (22)
miR-744-5p (and other miRNAs w/seed GCGGGGC)	mature microRNA		-1.886	0.0211	ARRB2,FOSB,HES4,ORAI2,PHC2,PODXL2,RAX,RCOR2,RGS16,SCRT1,SH3BGRL3,ZNF385A
miR-4476 (and other miRNAs w/seed AGGAAGG)	mature microRNA		-1.89	0.241	CREB5,GATM,MLLT11,PFKFB3,PPP1R14C,SEC61G,TPI1
miR-483-5p (miRNAs w/seed AGACGGG)	mature microRNA		-1.89	0.0013	ARRB2,CCNG2,MARCKSL1,MOB3B,PTMA,RGS16,SCRT1
miR-1906 (miRNAs w/seed GCAGCAG)	mature microRNA		-1.89	0.0685	CA14,DNM1,LDHA,RAB3A,TAGLN3,TSC22D1,VIPR2
miR-466d (and other miRNAs w/seed UGUGUGU)	mature microRNA		-1.89	0.421	BARHL2,FABP7,L1CAM,ORAI2,RUNX1T1,ST18,VIPR2
miR-2355-5p (miRNAs w/seed UCCCCAG)	mature microRNA		-1.89	0.0398	GPC2,NOVA2,PAX6,PLXNA2,STC2,TNNI1,ZNF608
miR-3126-5p (and other miRNAs w/seed GAGGGAC)	mature microRNA		-1.89	0.0116	CCND1,FAM131C,NHLH1,PDLIM4,SH3BGRL3,TNNI1,VASH2
miR-12197-3p (and other miRNAs w/seed CGGGGCU)	mature microRNA		-1.89	0.0374	CDKN1C,MCAM,NNAT,PFKFB3,PODXL2,RBFOX3,VASH2
miR-5580-5p (and other miRNAs w/seed GCUGGCU)	mature microRNA		-1.89	0.467	ACKR3,FZD5,MGLL,NDUFA4L2,NNAT,PFKFB3,PKM
miR-6717-5p (miRNAs w/seed GGCGAUG)	mature microRNA		-1.89	0.000145	AP1S2,ASCL1,ATP1A3,CRMP1,ELAVL3,NNAT,PTP4A3
miR-6760-5p (miRNAs w/seed AGGGAGA)	mature microRNA		-1.89	0.0659	FOSB,MLLT11,NHLH1,NOVA2,PTMS,RNF165,ZNF385A
miR-7056-5p (and other miRNAs w/seed GUGGAGG)	mature microRNA		-1.89	0.523	CRMP1,MIDN,PFKFB3,SCRT1,STMN2,TLE5,TSC22D1
CXCL12	cytokine		-1.892	3.6e-06	CCND1,CD9,CDKN1C,EGR1,FOS,HES1,ID1,JUN,JUNB,NR4A1,TF,VIM	150 (24)
miR-6840-5p (miRNAs w/seed CCCCCGG)	mature microRNA		-1.897	1.52e-05	E2F1,HES4,IGFBP2,ORAI2,PFKFB3,PPP1R14B,SCRT1,SOX4,TLCD3B,ZNF385A
miR-7020-5p (miRNAs w/seed GGGAUGG)	mature microRNA		-1.897	0.00429	APLP1,ASCL1,DNM1,GAPDH,H4C3,HES6,INA,NHLH1,RAB3A,SEZ6L2
miR-12192-5p (and other miRNAs w/seed GUGGGGU)	mature microRNA		-1.897	0.0346	BARHL2,CABP1,DUSP26,ELAVL3,LHX2,MIDN,NOVA2,SCRT1,TNNI1,VSX2
EDN1	cytokine		-1.899	7.48e-08	CCN1,CCND1,CDH2,EGR1,FOS,FOSB,HIF1A,JUN,JUNB,MARCKSL1,MCAM,RAB3A,VEGFA,VIM	156 (21)
miR-3104-5p (and other miRNAs w/seed AGGGGGC)	mature microRNA		-1.904	2.23e-05	BSG,DNM1,DPYSL4,ELAVL3,FOSB,FSCN1,FXYD1,FZD5,HES4,JUNB,MARCKSL1,MGLL,MSRB1,NHLH1,NOVA2,PPP1R14B,RBP1,SCRT1,SH3BGRL3,SPRY2,STON2,TBX3,TLCD3B,ZNF385A
GATA1	transcription regulator		-1.914	0.00145	BZW2,CCND1,CDK6,EGR1,FOSB,JUNB,KDR,MYB,PLXNA2,ST18	146 (18)
INS	other		-1.916	6.52e-11	CCN1,CCND1,COL2A1,DUSP1,EGR1,FOS,FOSB,HIF1A,IER2,IGFBP2,JUN,JUNB,NR4A1,SLC1A3,SOX9,VEGFA	141 (20)
ERK	group		-1.922	1.91e-05	CCK,CCND1,DUSP1,EGR1,FOS,JUN,JUNB,MCAM,SOX4,STMN4,VEGFA,ZFP36L1	145 (22)
BMPR1A	kinase		-1.928	0.00151	COL2A1,ID1,ID3,SOX9	114 (21)
miR-4787-5p (and other miRNAs w/seed CGGGGGU)	mature microRNA		-1.929	0.00181	DNM1,ELAVL3,LGI4,MIDN,NNAT,RAX,SCRT1,TLCD3B,TMSB10/TMSB4X,ZNF385A
miR-3070-5p (and other miRNAs w/seed GCCCCUG)	mature microRNA		-1.929	0.0351	APCDD1L,ASCL1,CELF3,NOL4,PCBP4,PHC2,RAB3A,SLC1A3,SOX4,TLCD3B
TET2	enzyme		-1.934	0.0889	ATP1A3,IFITM3,LDHA,SOX2
JAG1	growth factor		-1.937	1.53e-05	CCND1,DUSP1,GADD45A,HES1,SOX2,SPP1,VIM	134 (22)
ETV5	transcription regulator		-1.937	0.000299	CCND1,CDH2,ETV5,MYB,S100A6,SPP1,VEGFA	120 (17)
miR-673-3p (and other miRNAs w/seed CCGGGGC)	mature microRNA		-1.941	6.52e-05	CREB5,HES4,HSPB1,KDM6B,MIDN,MSRB1,ORAI2,RBFOX3,SCRT1,TLCD3B,TMSB10/TMSB4X,VAX2,VSX2
miR-4525 (and other miRNAs w/seed GGGGGAU)	mature microRNA		-1.941	0.000678	ARRB2,BCL7A,CHRNA3,FOSB,ID1,MIDN,NOVA2,ONECUT2,PTMS,RAB3A,RLBP1,TLCD3B,TNNI1
HIF3A	transcription regulator		-1.941	8.77e-06	HIF1A,PGK1,SOX2,VEGFA	137 (14)
EPHB1	kinase		-1.948	4.11e-06	EGR1,FOS,JUN,JUNB	121 (23)
miR-342-5p (and other miRNAs w/seed GGGGUGC)	mature microRNA		-1.949	0.000214	CKB,CXXC5,DPYSL4,E2F1,HOMER3,KDM6B,L1CAM,MIDN,NOVA2,NR4A1,ONECUT2,PCBP4,PHC2,RNF165,SOX4,TLE5,TNNI1,VSX2,ZNF385A
TAC1	other		-1.949	0.0158	CCN1,FOS,FOSB,HIF1A
CCL2	cytokine		-1.951	0.0333	CCND1,FOS,SOX2,VEGFA
Fgf	group		-1.967	5.28e-08	CCND1,FOS,JUN,JUNB,KDR,OTX2,SPRY2	113 (20)
ERG	transcription regulator		-1.977	0.000227	CADPS,CDH2,CHRNA3,FOSB,FZD5,GADD45A,MYO10,SOX4,SOX9,SPP1,VIM	105 (13)
TGFA	growth factor		-1.98	3.24e-06	CCND1,E2F1,FOS,JUNB,PTTG1,SOX9,VEGFA,VIM	120 (23)
FHL2	transcription regulator		-1.98	0.00356	CCND1,JUN,SOX9,SPP1	130 (23)
ZMPSTE24	peptidase		-1.981	0.00177	DDIT4,GADD45A,GADD45G,RGS16	99 (11)
Hedgehog	group		-1.981	1.59e-05	CCND1,GAS1,HES1,SOX2,SOX9,SPP1	65 (5)
CHRM1	G-protein coupled receptor		-1.981	8.77e-06	CCN1,EGR1,FOS,JUN	127 (22)
CSF1R	kinase		-1.981	0.000108	CCND1,FOS,JUN,JUNB,MYB	143 (21)
TRPM2	ion channel		-1.982	2.23e-05	BNIP3,HIF1A,LDHA,NDUFA4L2,VEGFA
RUNX1	transcription regulator		-1.982	0.000256	CCND1,CDKN1C,FSCN1,IFITM3,MYB,PARP1,PIK3R1,SOX4,SOX9,SPP1,VEGFA	152 (21)
miR-1964-5p (and other miRNAs w/seed GCUGGAG)	mature microRNA		-1.982	1	LIMD2,NKD2,NOL4,ORAI2
CDC42	enzyme		-1.982	4.03e-05	CCND1,COL2A1,FOS,JUN,SOX9	142 (19)
RPS6KA4	kinase		-1.992	8.77e-06	DUSP1,FOS,JUN,JUNB	130 (20)
N-cor	group		-1.997	3.35e-06	CCND1,CDK6,ENO1,HES1,LDHA,PGK1,PKM,REST,STMN2	114 (17)
MSI2	other		-1.997	6.85e-05	CCN1,CDH2,SOX2,VIM	122 (13)
RPS6KA5	kinase		-1.999	8.31e-05	DUSP1,FOS,JUN,JUNB	146 (18)
WWTR1	transcription regulator	Inhibited	-2	0.0202	CCN1,CCND1,HES1,KDR,SPP1
CLPP	peptidase	Inhibited	-2	0.00925	CRAT,ENO1,ETFB,GAPDH
FEV	transcription regulator	Inhibited	-2	0.0147	FOS,SLC1A3,SOX9,VIM
ACOX1	enzyme	Inhibited	-2	0.0723	CRAT,GADD45A,IGFBP2,MGLL
ARID3A	transcription regulator	Inhibited	-2	0.00925	DEK,FZD5,GPM6B,LGR4
miR-7676-5p (miRNAs w/seed GGGCAGU)	mature microRNA	Inhibited	-2	0.387	ACKR3,DPYSL4,PTP4A3,SLC6A9
miR-290b-3p (and other miRNAs w/seed AGUGCCC)	mature microRNA	Inhibited	-2	0.292	CHRNA3,HES6,PFKFB3,TMSB10/TMSB4X
miR-132-5p (miRNAs w/seed CCGUGGC)	mature microRNA	Inhibited	-2	0.237	APBA2,CRAT,GPI,LIMD2
miR-218-2-3p (and other miRNAs w/seed AUGGUUC)	mature microRNA	Inhibited	-2	0.0288	ACKR3,FSTL5,GADD45A,NEUROD4
miR-3677-5p (miRNAs w/seed AGUGGCC)	mature microRNA	Inhibited	-2	0.06	BARHL2,GATM,PPP1R14C,SH3BGRL3
miR-4283 (miRNAs w/seed GGGGCUC)	mature microRNA	Inhibited	-2	1	APLP1,PTMS,RBFOX3,RNF165
miR-4675 (and other miRNAs w/seed GGGCUGU)	mature microRNA	Inhibited	-2	0.357	HES6,KIF1A,PKM,PTPRF
miR-7151-3p (miRNAs w/seed UACAGGC)	mature microRNA	Inhibited	-2	0.175	FAM162A,HILPDA,ORAI2,SEC61G
miR-6961-3p (miRNAs w/seed CCUCUUU)	mature microRNA	Inhibited	-2	0.0141	BASP1,CAMK4,DUSP26,GADD45A
miR-4804-5p (miRNAs w/seed UGGACGG)	mature microRNA	Inhibited	-2	0.0125	MTUS1,PLXNA2,RBFOX3,STC2
miR-1293 (and other miRNAs w/seed GGGUGGU)	mature microRNA	Inhibited	-2	0.394	NOVA2,PTMA,TNNI1,TPI1
miR-5134-5p (miRNAs w/seed UGGCAGA)	mature microRNA	Inhibited	-2	0.237	GAL,LDHA,MLLT11,SH3BGRL3
PIK3CA	kinase	Inhibited	-2	5.95e-09	CCND1,CD24,CDH2,HIF1A,JUN,KDR,L1CAM,LUM,MTUS1,RARRES2,RBFOX3,RUNX1T1,SLC16A3,SPRY2,VIM	146 (23)
miR-5627-3p (miRNAs w/seed CAGGGCU)	mature microRNA	Inhibited	-2	0.235	APBA2,SH3BGRL3,SLC6A9,TLCD3B
FGFR3	kinase	Inhibited	-2	6.49e-06	CCND1,FOS,HES1,SOX9,SPP1,VIM	138 (22)
TNFSF13B	cytokine	Inhibited	-2	0.0782	ID1,JUN,SOX11,SPP1
TPH1	enzyme	Inhibited	-2	0.0125	JUN,LUM,PCLAF,TF
NCOA2	transcription regulator	Inhibited	-2	0.107	CCND1,EGR1,MYB,TPI1
miR-6881-3p (miRNAs w/seed UCCUCUU)	mature microRNA	Inhibited	-2	0.217	GAPDH,NRXN3,RNF165,SETBP1
miR-6925-3p (miRNAs w/seed CCCCUUU)	mature microRNA	Inhibited	-2	0.0423	ELAVL3,ORAI2,SOX4,TNNI1
miR-6786-3p (miRNAs w/seed GACGCCC)	mature microRNA	Inhibited	-2	0.0224	BCL7A,ELAVL3,FSCN1,MSRB1
miR-7081-3p (miRNAs w/seed UCCCCUG)	mature microRNA	Inhibited	-2	0.118	CCDC85B,ELAVL3,LRRN3,MSRB1
miR-6916-5p (and other miRNAs w/seed AGGAGGA)	mature microRNA	Inhibited	-2	0.437	CYB5A,NOVA2,RNF165,SEC61G
miR-6741-5p (and other miRNAs w/seed UGGGUGC)	mature microRNA	Inhibited	-2	0.323	GAPDH,INA,RAB3A,SLCO5A1
miR-6758-5p (and other miRNAs w/seed AGAGAGG)	mature microRNA	Inhibited	-2	0.201	ATP1A3,BASP1,PTMS,SH3BGRL3
miR-6894-5p (and other miRNAs w/seed GGAGGAU)	mature microRNA	Inhibited	-2	0.514	BASP1,JPT1,NHLH1,NOVA2
miR-6799-5p (miRNAs w/seed GGGAGGU)	mature microRNA	Inhibited	-2	0.118	ARRB2,CCK,TNNI1,ZNF385A
miR-6952-5p (miRNAs w/seed UGGUGGG)	mature microRNA	Inhibited	-2	0.423	ELAVL3,NHLH1,NOVA2,SPON2
FLT1	kinase	Inhibited	-2	0.013	COL2A1,FOS,SCRN1,SOX9
PCDH11Y	other	Inhibited	-2	6.85e-05	CCND1,JUN,SFRP2,TLE5
TREM2	transmembrane receptor	Inhibited	-2	0.00102	B2M,BAMBI,FABP5,HIF1A,WIF1	122 (11)
CREB1	transcription regulator	Inhibited	-2.003	3.01e-18	ATP6V0B,BNIP3,CAMK4,CCK,CCN1,CCND1,CD9,CDH2,CRMP1,CRYM,DUSP1,EGR1,FOS,FOSB,GADD45A,GADD45G,GAL,ID1,IER2,INA,JPT1,JUN,JUNB,MARCKSL1,MCAM,MIDN,NNAT,NR4A1,NREP,PLXNA2,RHEB,RUNX1T1,SAT1,SSR4,TF,VEGFA,VIM	121 (17)
PDGF BB	complex	Inhibited	-2.011	2.98e-10	ACKR3,ASCL1,CCN1,CCND1,DUSP1,EGR1,FOS,FOSB,GADD45A,HES1,ID3,IER2,JUN,JUNB,NR4A1,PRSS35,RBP1,SAT1,SPRY2,VEGFA,ZFP36L1	113 (22)
OVOL2	transcription regulator	Inhibited	-2.027	5.87e-07	ENO1,EPHA4,GPI,LDHA,PGK1,PKM,VIM
CXCR4	G-protein coupled receptor	Inhibited	-2.043	5.57e-08	ACKR3,CCND1,CD9,CDH2,EGR1,ID1,JUNB,PGK1,VEGFA	150 (22)
EGFR	kinase	Inhibited	-2.05	8.88e-10	BZW2,CCND1,CCNG2,CDK6,CRMP1,DUSP1,E2F1,EGR1,FABP7,FOS,GADD45A,GPM6B,HIF1A,HSPB1,ID1,IER2,JUN,JUNB,MCAM,PKM,PTPRF,SOX2,SOX9,SPRY2,VEGFA,VIM	160 (23)
miR-423-5p (and other miRNAs w/seed GAGGGGC)	mature microRNA	Inhibited	-2.075	6.82e-05	ARRB2,CDH2,DDIT4,DNM1,DPYSL4,FOSB,IFITM3,KDM6B,KIF1A,MAP1B,MGLL,NDUFA4L2,NNAT,PFKFB3,PTP4A3,RAB3A,RAX,RNF165,SCRT1,SLC6A9,THBS3,TLCD3B,VEGFA,VIM,ZNF608
GPER1	G-protein coupled receptor	Inhibited	-2.094	1.19e-10	CCN1,CCND1,DDIT4,DUSP1,EGR1,FOS,FOSB,IER2,JUN,RGS16,SFRP2	152 (22)
FLCN	other	Inhibited	-2.109	1.56e-05	ACKR3,CKB,COL2A1,ENO1,HIF1A,L1CAM,LDHA,PFKP,VEGFA	144 (21)
STAT5B	transcription regulator	Inhibited	-2.111	0.00221	CCND1,CD9,CDK6,DUSP1,FOS,GADD45A,IFITM3,JUN,LIMD2,TF,TNNI1	119 (19)
miR-6752-5p (and other miRNAs w/seed GGGGGUG)	mature microRNA	Inhibited	-2.112	2.82e-05	APCDD1L,ASCL1,BARHL2,DUSP1,ELAVL3,FAM131C,FOSB,FXYD1,FZD5,HOMER3,ID3,KDM6B,LIMD2,MGLL,MIDN,NHLH1,NOVA2,NR4A1,ORAI2,PHC2,PPP1R14A,RAB3A,RBP1,RCOR2,SCRT1,SLC1A3,SLC6A9,SOX4,TFAP2B,TLCD3B,TLE4,VSX2,ZFP36L1,ZNF385A
miR-1182 (and other miRNAs w/seed AGGGUCU)	mature microRNA	Inhibited	-2.121	0.00104	ELAVL3,H4C3,MLLT11,NHLH1,PFKP,SH3BGRL3,THBS3,TPI1
miR-4481 (and other miRNAs w/seed GAGUGGG)	mature microRNA	Inhibited	-2.121	0.149	KDM6B,MIDN,MOB3B,MSRB1,RAB3A,STMN2,TLE3,TNNI1
miR-3062-3p (and other miRNAs w/seed GGGGACA)	mature microRNA	Inhibited	-2.121	0.264	ELAVL3,FSCN1,ID3,L1CAM,PTP4A3,SH3BGRL3,SLC6A9,VEGFA
miR-3473h-5p (and other miRNAs w/seed AGGGGCU)	mature microRNA	Inhibited	-2.121	0.0292	FSCN1,MLLT11,PGK1,PTP4A3,RNF165,SOX4,TLCD3B,VSX2
miR-6081 (miRNAs w/seed GGAGCAG)	mature microRNA	Inhibited	-2.121	0.0283	BARHL2,BSG,PDLIM4,PFKP,PTMS,SFRP2,SPON2,TNNI1
CASR	G-protein coupled receptor	Inhibited	-2.121	0.000124	CCND1,EGR1,GADD45A,GADD45G,ID1,PTTG1,SSX2IP,VEGFA	127 (23)
miR-7036a-5p (miRNAs w/seed GCGGGGU)	mature microRNA	Inhibited	-2.121	0.000202	CAMK4,ID1,MIDN,ORAI2,PODXL2,SCRT1,TLE3,ZNF385A
miR-675-5p (and other miRNAs w/seed GGUGCGG)	mature microRNA	Inhibited	-2.138	0.00255	BARHL2,GAPDH,NNAT,PODXL2,TAGLN3,TNNI1,ZFP36L2,ZNF385A
MAP3K8	kinase	Inhibited	-2.145	0.00033	EGR1,FOS,FSCN1,JUN,JUNB,NR4A1,RAB3A,SPATS2L	124 (21)
ELK1	transcription regulator	Inhibited	-2.147	2.02e-06	ARRB2,EGR1,FOS,FOSB,JUN,JUNB,NR4A1,SPP1	131 (21)
Growth hormone	group	Inhibited	-2.149	8.27e-08	APLP1,CCND1,EGR1,FOS,FZD5,HES1,ID1,IGFBP2,JUN,JUNB,PFKFB3,RAB3A,SPP1,TF,TSC22D1	143 (22)
miR-1233-5p (and other miRNAs w/seed GUGGGAG)	mature microRNA	Inhibited	-2.164	0.18	APLP1,ASCL1,ATP1A3,CDKN1C,FAM131C,FOSB,NEUROD4,NOVA2,PHC2,PPP1R14B,VASH2
TRH	other	Inhibited	-2.169	6e-05	DUSP1,FOS,JUN,JUNB,NR4A1	121 (17)
CTNNB1	transcription regulator	Inhibited	-2.173	6.31e-15	ASCL1,BAMBI,CCN1,CCND1,CDH2,COL2A1,CRAT,CYB5A,EGR1,FOS,FZD5,GADD45G,GAPDH,HES1,HIF1A,HILPDA,ID1,ID3,ID4,IGFBP2,JUN,KDR,L1CAM,LHX2,LIMD2,NR4A1,ONECUT2,PGK1,PIK3R1,PKM,PRSS35,RAB3A,SCRN1,SOX11,SOX2,SOX4,SOX9,SPP1,TLE4,TLE5,TSC22D1,VEGFA,VIM,WIF1	144 (26)
mir-146	microRNA	Inhibited	-2.178	3.18e-05	DUSP1,FOS,GAPDH,GPI,HIF1A,IFITM3,PKM,SPRY2	135 (21)
miR-450b-3p (and other miRNAs w/seed UUGGGGA)	mature microRNA	Inhibited	-2.178	0.362	ELAVL3,MARCKSL1,NHLH1,NNAT,NOVA2,TFAP2C,TLE5,TNNI1
NR4A1	ligand-dependent nuclear receptor	Inhibited	-2.178	0.0016	CCND1,E2F1,ENO1,GPI,HIF1A,ID1,MARCKSL1,NR4A1,PGK1,SAT1	144 (21)
MAP2K5	kinase	Inhibited	-2.182	0.000242	CCND1,FOS,ID1,JUN,NR4A1	87 (19)
FOXC2	transcription regulator	Inhibited	-2.183	0.000461	CDH2,COL2A1,KDR,SOX9,SPP1,VIM	129 (18)
miR-6721-5p (miRNAs w/seed GGGCAGG)	mature microRNA	Inhibited	-2.183	0.0138	BARHL2,ELAVL3,FSCN1,ID3,IFITM3,INA,MGLL,MIDN,NDUFA4L2,NHLH1,ORAI2,PTP4A3,RAB3A,SLC6A9,SSR4,TLE5,VSX2
BMPR1B	kinase	Inhibited	-2.183	1.13e-05	COL2A1,ID1,ID3,NR2E1,SOX9	95 (15)
TGFB3	growth factor	Inhibited	-2.186	6.83e-07	CCN1,CDH2,COL2A1,FOS,FOSB,JUN,MYO10,SMAD2,SOX9,VEGFA	112 (18)
Il3	cytokine	Inhibited	-2.188	0.000173	COL2A1,EGR1,FOS,MYB,SOX9,SPP1	134 (23)
IPMK	kinase	Inhibited	-2.191	0.000404	CCN1,FOS,FOSB,JUN,JUNB	121 (19)
BMP10	growth factor	Inhibited	-2.2	0.00354	FOS,ID1,ID3,NR4A1,SOX9	97 (8)
SRC (family)	group	Inhibited	-2.2	1.39e-06	CDH2,CDKN1C,EGR1,HIF1A,ID1,SMAD2,SOX2	153 (26)
TCF	group	Inhibited	-2.204	7.03e-06	CCND1,CRAT,EGR1,FOS,ID3,JUNB,SOX9,TSC22D1	131 (18)
FGFR1	kinase	Inhibited	-2.205	0.00259	CCND1,FOS,HES1,JUN,PLP1,VIM	137 (25)
PRKCB	kinase	Inhibited	-2.207	0.000101	CCND1,EGR1,FOS,HIF1A,JUN,PFKFB3	146 (22)
IRF2	transcription regulator	Inhibited	-2.213	0.000734	B2M,CCND1,CLIC1,FAM111A,H4C3,ID1,PFKFB3
ETS2	transcription regulator	Inhibited	-2.213	0.00131	FOS,JUN,JUNB,SOX2,SPP1	157 (23)
miR-6980-5p (and other miRNAs w/seed UGGGGGG)	mature microRNA	Inhibited	-2.216	1.38e-05	APLP1,ARRB2,ATP1A3,BCL7A,BSG,CRAT,DDIT4,DUSP1,DUSP26,ELAVL3,FOSB,H4C3,ISYNA1,KDM6B,MIDN,NHLH1,NOVA2,NR2E1,NR4A1,PPP1R14B,RAB3A,RAX,RNF165,SH3BGRL3,TMSB10/TMSB4X,ZFP36L1,ZNF385A
JAK1	kinase	Inhibited	-2.216	0.000173	FOS,HIF1A,ID1,JUNB,SLC1A3,TF	120 (22)
MST1R	kinase	Inhibited	-2.216	1.61e-05	CCND1,FOS,JUN,SMAD2,VIM	133 (22)
EDN3	other	Inhibited	-2.219	2.48e-06	CCND1,CDH2,EGR1,FOS,MCAM	128 (21)
GNRH1	other	Inhibited	-2.224	0.000685	EGR1,FOS,FOSB,JUN,JUNB	94 (19)
SPTBN1	other	Inhibited	-2.228	2.6e-07	FOS,LDHA,PFKFB3,PFKP,PKM	65 (7)
LIN28A	other	Inhibited	-2.234	1.78e-05	ASCL1,CCN1,CCND1,CDH2,SOX2,VIM	134 (16)
GLI3	transcription regulator	Inhibited	-2.236	0.000722	CCND1,DUSP1,EGR1,FOSB,JUNB,SOX9
miR-4270 (and other miRNAs w/seed CAGGGAG)	mature microRNA	Inhibited	-2.236	0.339	APBA2,NHLH1,NOVA2,PLXNA2,ZNF385A
miR-504-5p (and other miRNAs w/seed GACCCUG)	mature microRNA	Inhibited	-2.236	0.27	DUSP26,LIMD2,MSRB1,ORAI2,VEGFA
miR-1915-3p (and other miRNAs w/seed CCCAGGG)	mature microRNA	Inhibited	-2.236	0.329	DUSP26,HES6,ORAI2,PCSK1N,PFKFB3
miR-4767 (miRNAs w/seed GCGGGCG)	mature microRNA	Inhibited	-2.236	0.0525	CCDC85B,KDM6B,PODXL2,RBFOX3,SCRT1
miR-3657 (and other miRNAs w/seed GUGUCCC)	mature microRNA	Inhibited	-2.236	0.337	DDIT4,ELAVL3,FNDC5,HES6,PAX6
miR-3078-3p (miRNAs w/seed UGCUGGG)	mature microRNA	Inhibited	-2.236	0.22	ACKR3,GAPDH,PCSK1N,SCRT1,VAX2
miR-4286 (miRNAs w/seed CCCCACU)	mature microRNA	Inhibited	-2.236	0.0695	ATP1A3,GPC2,NHLH1,RCOR2,TMSB10/TMSB4X
APEX1	enzyme	Inhibited	-2.236	1.07e-06	EGR1,FOS,FOSB,JUNB,NR4A1,VEGFA	140 (22)
miR-6829-5p (miRNAs w/seed GGGCUGC)	mature microRNA	Inhibited	-2.236	0.528	HES6,L1CAM,LIMD2,PTPRF,TPI1
miR-7058-5p (miRNAs w/seed AGAGGGG)	mature microRNA	Inhibited	-2.236	0.281	ATP1A3,DNM1,MLLT11,NOVA2,ZNF385A
miR-7226-3p (miRNAs w/seed GACACAG)	mature microRNA	Inhibited	-2.236	0.0254	ATP1A3,CXXC5,PTP4A3,SLCO5A1,TNNI1
miR-6987-5p (miRNAs w/seed GGGACAG)	mature microRNA	Inhibited	-2.236	0.508	APLP1,FNDC5,FSCN1,NNAT,PTP4A3
miR-6798-3p (miRNAs w/seed UACCCCC)	mature microRNA	Inhibited	-2.236	0.0293	CCDC85B,CELF3,GPC2,MTUS1,RNF165
MAP2K1/2	group	Inhibited	-2.243	2.22e-06	CCND1,DUSP1,EGR1,FOS,HSPB1,JUN,VEGFA,VIM	129 (20)
ESR1	ligand-dependent nuclear receptor	Inhibited	-2.256	1.91e-13	ACKR3,CCDC85B,CCN1,CCND1,CCNG2,CDK6,CDKN1C,CKB,DDIT4,E2F1,EGR1,ENO1,FBXW7,FOS,FOSB,GADD45G,GAL,H4C3,HES1,HIF1A,HOMER3,ID1,IFITM3,IGFBP2,JUN,JUNB,MAP1B,MYB,ONECUT2,OTX2,PLXNA2,PRSS23,PTMA,PTTG1,PYGL,RGS16,RHEB,SCARB2,SLC16A3,SMAD2,SOX4,SOX9,SPP1,SSX2IP,STC2,TFAP2C,THBS3,TLE5,VEGFA,VIM	162 (21)
F2R	G-protein coupled receptor	Inhibited	-2.263	1.24e-09	CCN1,CCND1,CD24,DUSP1,EGR1,FOS,KDR,MCAM,MIF,NR4A1,VEGFA,VIM	124 (19)
miR-4271 (and other miRNAs w/seed GGGGAAG)	mature microRNA	Inhibited	-2.304	0.0291	BARHL2,CELF3,EGR1,FXYD1,IGFBP2,MARCKSL1,MIDN,MLLT11,NOVA2,PHC2,PODXL2,RAB3A,ST18,STON2,TLE5,VAX2,ZNF385A
miR-3173-5p (and other miRNAs w/seed GCCCUGC)	mature microRNA	Inhibited	-2.331	0.00739	APBA2,CCDC85B,CRMP1,E2F1,FAM131C,FZD5,HES6,LIMD2,NNAT,ORAI2,PHC2,SLC16A3
miR-6752-3p (miRNAs w/seed CCCUGCC)	mature microRNA	Inhibited	-2.333	0.0238	CLIC1,FAM131C,LIMD2,PCBP4,RBFOX3,RNF165,STC2,TLCD3B,TMSB10/TMSB4X
miR-4472 (and other miRNAs w/seed GUGGGGG)	mature microRNA	Inhibited	-2.333	0.0275	BARHL2,BCL7A,ELAVL3,ISYNA1,NOVA2,RNF165,SCRT1,TNNI1,ZNF385A
miR-4640-5p (and other miRNAs w/seed GGGCCAG)	mature microRNA	Inhibited	-2.333	0.145	MSRB1,ORAI2,PCBP4,PHC2,PPP1R14B,TF,TLCD3B,TMSB10/TMSB4X,TNNI1
COMMD1	transporter	Inhibited	-2.333	3.04e-12	BNIP3,DDIT4,LDHA,PFKFB3,PFKP,PGK1,STC2,TF,VEGFA	89 (7)
miR-4532 (miRNAs w/seed CCCGGGG)	mature microRNA	Inhibited	-2.333	0.00144	CCDC85B,DDIT4,ELAVL3,HILPDA,ID3,ORAI2,PODXL2,RBFOX3,TMSB10/TMSB4X
miR-2861 (and other miRNAs w/seed GGGCCUG)	mature microRNA	Inhibited	-2.335	0.101	CRAT,DPYSL4,DUSP26,ELAVL3,MGLL,MSRB1,PFKFB3,SCRT1,SLC6A9,VSX2
SRF	transcription regulator	Inhibited	-2.336	1.29e-05	EGR1,FABP5,FOS,FOSB,GADD45A,GADD45G,HES6,IER2,JUN,JUNB,KDR,MYB,NR4A1,ODF2L,PTMS	79 (11)
miR-6976-5p (and other miRNAs w/seed AGGGAAG)	mature microRNA	Inhibited	-2.345	0.0225	AP1S2,APLP1,CA14,FAM162A,FNDC5,HSPB1,INA,MLLT11,PAX6
miR-6810-5p (and other miRNAs w/seed UGGGGAC)	mature microRNA	Inhibited	-2.345	0.179	CCK,ELAVL3,MARCKSL1,NHLH1,NOVA2,PTP4A3,RAX,TNNI1,VEGFA
miR-3103-5p (and other miRNAs w/seed GAGGGAG)	mature microRNA	Inhibited	-2.357	0.00756	ATP1A3,ATP6V0B,DBI,DNM1,DUSP26,FAM111A,FAM131C,FOSB,GAPDH,HES6,LIMD2,NHLH1,NNAT,NOVA2,PTMS,RNF165,SH3BGRL3,STON2,TBX3,ZFP36L1
miR-7064-3p (and other miRNAs w/seed AGGGCCC)	mature microRNA	Inhibited	-2.36	0.0287	ACKR3,FOSB,MTUS1,NEUROD4,PKM,PPP1R14B,PTP4A3,TLCD3B,TNNI1
miR-6929-5p (and other miRNAs w/seed GGGAGGA)	mature microRNA	Inhibited	-2.377	0.331	DBI,FOSB,HES6,MIDN,NDUFA4L2,NHLH1,NOVA2,PHC2,RNF165,SH3BGRL3,TNNI1,ZNF385A
TGFBR2	kinase	Inhibited	-2.381	7.47e-10	CCND1,CDH2,CKB,DDIT4,EGR1,GADD45G,GAL,GATM,HILPDA,HSPB1,ID1,ID3,JUN,KDR,LDHA,PGK1,PKM,SLC16A3,SPP1,STC2,TPI1,VEGFA	146 (20)
JAK2	kinase	Inhibited	-2.391	5.45e-05	CCND1,EGR1,FOS,NR4A1,PCBP4,RBP1,SLC1A3,TF,TSC22D1	126 (24)
IGF1	growth factor	Inhibited	-2.395	3.95e-19	BSG,CCN1,CCND1,CCNG2,COL2A1,DDIT4,DUSP1,E2F1,EGR1,FOS,FOSB,GADD45A,GADD45G,GAPDH,HIF1A,ID1,IER2,IFITM3,IGFBP2,JUN,JUNB,KIF1A,LDHA,MIF,MYB,NR4A1,PARP1,PKM,PLP1,PPP1R14A,PTTG1,REST,SOX2,SPP1,TF,VEGFA,VIM,ZFP36L1,ZFP36L2	132 (22)
miR-1237-5p (and other miRNAs w/seed GGGGGCG)	mature microRNA	Inhibited	-2.395	2.59e-08	ARRB2,ATP1A3,BCL7A,BSG,COL2A1,DPYSL4,ELAVL3,FSCN1,FXYD1,HES4,IER2,ISYNA1,JUN,KDR,L1CAM,LIMD2,MIDN,NDUFA4L2,NHLH1,NNAT,PTP4A3,RBFOX3,RLBP1,SCRT1,SLC16A3,SLC6A9,STON2,TBX3,TLE3,VEGFA,ZNF385A
STAT5A	transcription regulator	Inhibited	-2.401	2.05e-05	CCND1,CD24,CDK6,FOS,FOSB,GADD45A,GADD45G,ID1,PODXL2,PRSS23,SETBP1,TLE4,TNNI1	143 (22)
miR-1343-5p (and other miRNAs w/seed GGGGAGC)	mature microRNA	Inhibited	-2.412	0.00354	CELF3,ELAVL3,FOSB,FSCN1,KDM6B,LIMD2,MIDN,MOB3B,NNAT,NREP,ONECUT2,PCBP4,RAX,SCRT1,TLCD3B,TLE5,VEGFA,ZNF385A
VEGFA	growth factor	Inhibited	-2.418	1.61e-09	CCN1,CCND1,E2F1,EGR1,ETV5,FOS,FOSB,HES1,HIF1A,ID1,ID3,JUNB,KDR,NR4A1,PARP1,SLC25A6,SPP1,TMSB10/TMSB4X,VEGFA	124 (22)
Jnk	group	Inhibited	-2.418	2.92e-05	CCND1,CDH2,DUSP1,EGR1,FOS,FOSB,GADD45A,HES1,JUN,NR4A1,RBP1	139 (19)
miR-4651 (and other miRNAs w/seed GGGGUGG)	mature microRNA	Inhibited	-2.427	6.71e-05	APBA2,ASCL1,CCND1,ELAVL3,FOSB,FSCN1,FXYD1,FZD5,GAPDH,HOMER3,ID3,KDM6B,LIMD2,MAP1B,MIDN,MIF,MLLT11,MSRB1,NHLH1,NOVA2,NR4A1,ORAI2,PFKFB3,PPP1R14A,RAB3A,RBP1,RNF165,SCRT1,SLC16A3,SOX4,TFAP2B,TLE3,TNNI1,TTYH1,VSX2,ZFP36L1,ZNF385A
SMAD1	transcription regulator	Inhibited	-2.433	1.1e-05	COL2A1,ID1,ID4,SOX9,SPP1,VEGFA	132 (17)
miR-339-5p (and other miRNAs w/seed CCCUGUC)	mature microRNA	Inhibited	-2.433	0.161	LIMD2,NNAT,ORAI2,PFKFB3,TLE3,VEGFA
SKIC2	enzyme	Inhibited	-2.449	8.52e-06	DDIT4,ENO1,GAPDH,LDHA,PGK1,TPI1
miR-1252-5p (miRNAs w/seed GAAGGAA)	mature microRNA	Inhibited	-2.449	0.0162	BSG,CAMK4,NEUROD4,ONECUT2,SOX4,SSR4
miR-328-5p (and other miRNAs w/seed GGGGGCA)	mature microRNA	Inhibited	-2.449	0.345	DPYSL4,MSRB1,NHLH1,NNAT,SCRT1,ZNF385A
miR-4755-3p (miRNAs w/seed GCCAGGC)	mature microRNA	Inhibited	-2.449	0.489	ONECUT2,ORAI2,PLXNA2,PTPRF,SH3BGRL3,TNNI1
miR-939-3p (miRNAs w/seed CCUGGGC)	mature microRNA	Inhibited	-2.449	0.459	ATP1A3,CABP1,NDUFA4L2,RGS16,TNNI1,VEGFA
miR-6990-5p (and other miRNAs w/seed CCAGGGU)	mature microRNA	Inhibited	-2.449	0.0826	BARHL2,HILPDA,MGLL,NHLH1,TFAP2C,VIPR2
miR-337-3p (and other miRNAs w/seed CAGCUCC)	mature microRNA	Inhibited	-2.449	0.16	DDIT4,ONECUT2,PPP1R14C,PTP4A3,RCOR2,STMN4
miR-1207-5p (and other miRNAs w/seed GGCAGGG)	mature microRNA	Inhibited	-2.463	0.000216	CELF3,CRAT,DNM1,EGR1,ELAVL3,ETV5,FOSB,FSCN1,FXYD1,GAPDH,HES4,ID3,INA,MGLL,MIDN,MSRB1,NDUFA4L2,PCBP4,PCSK1N,PPP1R14A,PPP1R14B,PTMS,RAB3A,RBFOX3,SLC6A9,SOX9,SSR4,STMN2,TLCD3B,VSX2
PTH	other	Inhibited	-2.486	4.2e-06	CCND1,COL2A1,DUSP1,FOS,FOSB,ID4,JUN,NR4A1,SFRP2,SPP1,WIF1	91 (18)
MAPK1	kinase	Inhibited	-2.507	5.91e-06	CCND1,CDH2,DUSP1,E2F1,EGR1,FOS,FOSB,IFITM3,JUN,JUNB,NR4A1,RGS16,SFRP2,SPP1,SPRY2,VIM	120 (19)
Mek	group	Inhibited	-2.516	3.24e-11	ASCL1,CCND1,CDH2,EGR1,ETV5,FOS,GPM6B,HIF1A,HSPB1,ID1,IER2,JUN,JUNB,KDR,L1CAM,NR4A1,OTX2,PAX6,PTPRF,SPRY2,TFAP2C,VIM	140 (22)
miR-6749-3p (miRNAs w/seed UCCUCCC)	mature microRNA	Inhibited	-2.53	0.0404	FSTL5,FXYD1,LIMD2,NHLH1,NOVA2,ORAI2,PTMA,RBFOX3,RNF165,STC2
miR-10396b-5p (and other miRNAs w/seed GGCGGGG)	mature microRNA	Inhibited	-2.534	0.0457	HSPB1,INA,NDUFA4L2,NNAT,NOVA2,PCSK1N,RAB3A,RAX,SCRT1,SOX11,TLE3,VSX2,ZNF385A
miR-766-5p (and other miRNAs w/seed GGAGGAA)	mature microRNA	Inhibited	-2.538	0.197	BASP1,HILPDA,JPT1,MIDN,NHLH1,NOVA2,RUNX1T1,SH3BGRL3,STC2,VSX2
IL1	group	Inhibited	-2.569	0.0152	COL2A1,DUSP1,EGR1,FOS,FZD5,HIF1A,JUN,SOX9,VEGFA
miR-1273h-5p (and other miRNAs w/seed UGGGAGG)	mature microRNA	Inhibited	-2.569	0.0574	ARRB2,ASCL1,CCK,DDHD1,FAM131C,HES4,MARCKSL1,MIDN,MSRB1,NHLH1,NNAT,NOVA2,RBFOX3,STMN2,TNNI1,ZNF385A
miR-153-3p (miRNAs w/seed UGCAUAG)	mature microRNA	Inhibited	-2.626	0.0139	DDIT4,EPHA4,GATM,NEUROD4,TAGLN3,TMSB10/TMSB4X,VASH2
miR-466b-5p (and other miRNAs w/seed AUGUGUG)	mature microRNA	Inhibited	-2.646	0.0737	AP1S2,CCK,ONECUT2,ORAI2,SLCO3A1,ST18,VEGFA
miR-1966-5p (miRNAs w/seed AGGGAGC)	mature microRNA	Inhibited	-2.646	0.0136	AP1S2,LIMD2,MGLL,MSRB1,NDUFA4L2,NNAT,RAB3A
miR-6418-5p (miRNAs w/seed CAGGGGA)	mature microRNA	Inhibited	-2.646	0.0578	CXXC5,DNM1,HSPB1,MARCKSL1,MSRB1,PCSK1N,TAGLN3
miR-6873-5p (miRNAs w/seed AGAGGGA)	mature microRNA	Inhibited	-2.646	0.0379	ATP1A3,ATP6V0B,CAMK4,CRAT,MLLT11,NOVA2,PDLIM4
miR-6756-5p (and other miRNAs w/seed GGGUGGG)	mature microRNA	Inhibited	-2.668	0.109	BSG,ELAVL3,FOSB,HES4,HES6,MGLL,NNAT,NOVA2,PHC2,PKM,SCRT1,SETBP1,TLCD3B,TNNI1,VEGFA,VSX2,ZNF385A
miR-3175 (miRNAs w/seed GGGGAGA)	mature microRNA	Inhibited	-2.673	0.0468	BARHL2,CHD4,FSCN1,HES4,LIMD2,MOB3B,NHLH1,NNAT,NOVA2,PCBP4,PTMS,SCRT1,TNNI1,ZNF385A
miR-541-3p (and other miRNAs w/seed GGUGGGC)	mature microRNA	Inhibited	-2.673	0.00124	APCDD1L,BCL7A,CKB,L1CAM,LIMD2,MGLL,MIF,NNAT,NREP,PLXNA2,RAB3A,RCOR2,TLE5,ZNF385A
SOX9	transcription regulator	Inhibited	-2.693	2.05e-07	CDH2,COL2A1,FOS,HES1,LHX2,SOX2,SOX4,SOX8,SOX9,VEGFA,WIF1	137 (23)
miR-328-5p (and other miRNAs w/seed GGGGGGC)	mature microRNA	Inhibited	-2.711	2.31e-05	ATP1A3,BCL7A,DNM1,ELAVL3,FAM131C,FOSB,FSCN1,HES4,ISYNA1,JUNB,KDM6B,L1CAM,LGI4,LIMD2,NOVA2,PPP1R14A,PPP1R14B,PTMS,RAB3A,RNF165,SCRT1,VAX2,ZNF385A
miR-6777-5p (and other miRNAs w/seed CGGGGAG)	mature microRNA	Inhibited	-2.714	0.000977	CCDC85B,ELAVL3,FSCN1,NDUFA4L2,NHLH1,PTP4A3,RAB3A,RAX,SCRT1,VEGFA,ZNF385A
PRL	cytokine	Inhibited	-2.718	4.95e-07	B2M,CCND1,EGR1,ENO1,FOS,HES1,ID1,ID3,JUN,PDLIM4,SFRP2,SPP1,STC2,TSC22D1,TUBA1B,VIM	135 (23)
miR-361-3p (miRNAs w/seed CCCCCAG)	mature microRNA	Inhibited	-2.72	0.0775	CHD4,DPYSL4,HES6,MIDN,NOVA2,NR4A1,RCOR2,RNF165,SLC6A9,STC2,TNNI1
miR-6852-5p (and other miRNAs w/seed CCUGGGG)	mature microRNA	Inhibited	-2.739	0.333	FAM131C,FSCN1,HES4,KIF1A,LIMD2,MIDN,RBFOX3,RNF165,THBS3,TLCD3B,VEGFA
EGLN	group	Inhibited	-2.794	2.32e-12	ASCL1,BNIP3,DPYSL4,FTL,GAPDH,GPI,LDHA,MIF,PFKP,PGK1,PYGL,RNF165,SLC16A3,SOX9,STC2,TPI1,VEGFA	105 (11)
EPHA2	kinase	Inhibited	-2.795	2.09e-08	DUSP1,EGR1,FOS,FOSB,JUN,JUNB,NR4A1,SOX2	124 (22)
miR-6825-5p (and other miRNAs w/seed GGGGAGG)	mature microRNA	Inhibited	-2.798	4.97e-05	APLP1,BCL7A,CELF3,CRAT,CYB5A,DNAJB1,DNM1,DPYSL4,ELAVL3,FAM111A,FOSB,FSCN1,GPI,HES4,HES6,KDM6B,LIMD2,MOB3B,NDUFA4L2,NHLH1,NNAT,NOVA2,NR2E1,PHC2,PKM,PTMS,RAX,RNF165,SCRT1,SEZ6L2,SH3BGRL3,SLC16A3,SMAD2,SORCS1,SOX4,TLCD3B,TLE5,TSC22D1,VSX2,ZFP36L1,ZNF385A
miR-6815-5p (and other miRNAs w/seed AGGUGGC)	mature microRNA	Inhibited	-2.813	0.208	DDIT4,HSPB1,LIMD2,MGLL,NRXN3,SLC16A3,TAGLN3,TMSB10/TMSB4X
YAP1	transcription regulator	Inhibited	-2.819	2.04e-06	CCN1,CCND1,CDH2,CDK6,CDKN1C,E2F1,EGR1,FOS,GADD45A,ID1,LDHA,LIMCH1,MAP1B,PKM,SMAD2,SOX2,SOX9,THBS3,VEGFA,VIM	146 (20)
DDB1	other	Inhibited	-2.828	1.05e-09	CCN1,DNAJB1,E2F1,EGR1,FOS,ID3,IER2,NR4A1
miR-3180-3p (and other miRNAs w/seed GGGGCGG)	mature microRNA	Inhibited	-2.828	4.93e-06	ATP1A3,BCL7A,BZW2,CABP1,FSCN1,FXYD1,GAS1,IGFBP2,INA,KDM6B,L1CAM,MIDN,PODXL2,RAB3A,RAX,SCRT1,TLCD3B,ZNF385A
miR-6967-5p (and other miRNAs w/seed AGGGAGG)	mature microRNA	Inhibited	-2.902	0.0126	DBI,ELAVL3,FAM131C,GAPDH,GPI,HES4,HES6,IFITM3,MLLT11,NDUFA4L2,NHLH1,NOVA2,PTMS,RAB3A,RNF165,SEZ6L2,SH3BGRL3,ZNF385A
Pkc(s)	group	Inhibited	-2.95	9.18e-07	CCN1,DUSP1,EGR1,FOS,GADD45A,HIF1A,JUN,JUNB,NR4A1,SLC6A9,SPP1,STC2,VEGFA	138 (21)
miR-92a-2-5p (miRNAs w/seed GGUGGGG)	mature microRNA	Inhibited	-2.999	0.000105	BCL7A,CELF3,CREB5,CRMP1,DPYSL4,ELAVL3,FOSB,FXYD1,GAPDH,HES4,KDM6B,L1CAM,MIDN,NDUFA4L2,NHLH1,NNAT,NOVA2,NR2E1,PCBP4,SCRT1,SLC16A3,SOX4,STMN2,TLE3,VEGFA,ZFP36L1,ZNF385A
miR-664-1-5p (and other miRNAs w/seed UGGCUGG)	mature microRNA	Inhibited	-3	0.173	ACKR3,DNM1,FAM131C,FTL,NRXN3,ORAI2,PTMS,SH3BGRL3,SPATS2L
FN1	enzyme	Inhibited	-3.073	2.36e-05	CCN1,CCND1,CDH2,CDK6,FOS,SCRN1,SMAD2,SOX2,SOX9,SPP1,VIM	145 (24)
miR-3083-5p (and other miRNAs w/seed GGCUGGG)	mature microRNA	Inhibited	-3.216	0.000348	CELF3,DNM1,E2F1,FAM131C,FOSB,FSCN1,GPI,HES6,ID3,KDM6B,L1CAM,MARCKSL1,MIDN,NHLH1,NNAT,NOL4,NR4A1,NRXN3,ORAI2,PLXNA2,PTMS,PTP4A3,RARRES2,RBFOX3,RCOR2,RNF165,SH3BGRL3,SLC6A9,VSX2
EGF	growth factor	Inhibited	-3.228	1.18e-15	CCN1,CCND1,DUSP1,E2F1,EGR1,FABP7,FOS,FOSB,GADD45A,GAL,GAS1,HES1,HIF1A,ID1,IER2,IGFBP2,JUN,JUNB,KDM6B,LDHA,NR4A1,PAX6,PIK3R1,PTF1A,PTTG1,REST,SFRP2,SOX2,SOX4,SOX9,SPP1,SPRY2,TF,VEGFA,VIM,ZFP36L2	152 (20)
miR-1275 (and other miRNAs w/seed UGGGGGA)	mature microRNA	Inhibited	-3.266	0.000242	ARRB2,ATP1A3,BCL7A,CELF3,ELAVL3,FOSB,GAPDH,H4C3,ID1,ISYNA1,KDM6B,L1CAM,NDUFA4L2,NHLH1,NOVA2,PLP1,PPP1R14A,PPP1R14B,PTMS,RAB3A,RCOR2,RNF165,SH3BGRL3,TBX3,TFAP2B,TLCD3B,TNNI1,ZNF385A
miR-185-3p (and other miRNAs w/seed GGGGCUG)	mature microRNA	Inhibited	-3.312	0.0614	ARRB2,DNM1,ELAVL3,FAM131C,FSCN1,GAPDH,HES6,MSRB1,NDUFA4L2,NNAT,ONECUT2,PFKFB3,RNF165,SFRP2,SH3BGRL3,SLC6A9,SOX9,THBS3,TLCD3B,TNNI1,ZFP36L1
miR-149-3p (and other miRNAs w/seed GGGAGGG)	mature microRNA	Inhibited	-3.411	0.0142	BCL7A,DNM1,ELAVL3,FAM131C,FOSB,FSCN1,HES4,HES6,KDM6B,LIMD2,MTUS1,NHLH1,NOVA2,PHC2,PTMS,RNF165,SCRT1,SEZ6L2,SH3BGRL3,SORCS1,TNNI1,ZNF385A
miR-6795-5p (and other miRNAs w/seed GGGGGGA)	mature microRNA	Inhibited	-3.441	0.00076	APCDD1L,ARRB2,ATP1A3,ATP6V0B,BCL7A,CRAT,ELAVL3,FOSB,KDM6B,L1CAM,MIDN,NHLH1,NOVA2,ONECUT2,RAB3A,RAX,RNF165,SH3BGRL3,ZNF385A
miR-3473b (and other miRNAs w/seed GGCUGGA)	mature microRNA	Inhibited	-3.464	0.013	FTL,HILPDA,MARCKSL1,NNAT,ORAI2,PLXNA2,PTMS,PTPRF,RBP1,RGS16,SLC6A9,TNNI1
miR-4723-5p (and other miRNAs w/seed GGGGGAG)	mature microRNA	Inhibited	-3.479	3.39e-05	ARRB2,ATP1A3,BARHL2,BCL7A,CELF3,CYB5A,DNM1,ELAVL3,FAM131C,FOSB,FXYD1,GPI,H4C3,HES4,ID1,KDM6B,L1CAM,MGLL,MIDN,MOB3B,NDUFA4L2,NHLH1,NOVA2,NREP,ONECUT2,PHC2,RAB3A,RNF165,SH3BGRL3,SOX4,TBX3,TLCD3B,TLE3,TLE5,TNNI1,ZFP36L1,ZNF385A
miR-762 (and other miRNAs w/seed GGGCUGG)	mature microRNA	Inhibited	-3.543	0.0101	ARRB2,ATP6V0B,CRAT,CREB5,DNM1,ENO1,FSCN1,HES6,ID3,KDM6B,KIF1A,L1CAM,MGLL,NDUFA4L2,NHLH1,NNAT,NOVA2,PFKFB3,PKM,PTP4A3,PTPRF,RAX,SCG3,SLC6A9,TNNI1,VSX2
miR-296-5p (miRNAs w/seed GGGCCCC)	mature microRNA	Inhibited	-3.588	0.00021	CCND1,ELAVL3,FZD5,GADD45G,HSPB1,LOXL1,MIDN,ONECUT2,ORAI2,PCBP4,PHC2,PKM,RAB3A,RBFOX3,SCRT1,SLC16A3,SLC25A6,SPON2,TLCD3B,TNNI1,VEGFA
miR-625-5p (and other miRNAs w/seed GGGGGAA)	mature microRNA	Inhibited	-3.597	0.0224	ATP6V0B,BCL7A,ELAVL3,FSCN1,MARCKSL1,MIDN,MOB3B,NDUFA4L2,NOVA2,PHC2,PKM,PLP1,RAB3A,RNF165,SH3BGRL3,TBX3,TLCD3B,TLE3,TNNI1,ZNF385A
miR-3584-5p (and other miRNAs w/seed GGAGGAG)	mature microRNA	Inhibited	-3.742	0.00362	BASP1,HILPDA,JPT1,MIDN,MTUS1,NDUFA4L2,NHLH1,NOVA2,PFKFB3,RNF165,RUNX1T1,SH3BGRL3,SPON2,TLE3
miR-486-3p (and other miRNAs w/seed GGGGCAG)	mature microRNA	Inhibited	-3.928	0.000253	ATP1A3,BARHL2,BCL7A,CELF3,CYB5A,E2F1,ELAVL3,FAM131C,FNDC5,HES4,L1CAM,LIMD2,MOB3B,MSRB1,NDUFA4L2,NHLH1,NNAT,ONECUT2,PCBP4,PFKP,PPP1R14A,PPP1R14B,PTMS,RNF165,SLC6A9,TLE3,TLE5,TMSB10/TMSB4X,TPI1,VIPR2
Histone h2a	group			0.00446	EGR1,IGFBP2,JUN
CSDE1 HNRNPD PABP PAIP1 SYNCRIP	complex			0.0108	FOS
dopamine D1 receptor	group			0.0215	FOSB
IGF receptor	group			0.0425	VEGFA
Alpha 1 antitrypsin	group			0.0465	COL2A1,SOX9
Keratin 16	group			0.0108	CCND1
TEAD	group			0.00598	CCN1,CCND1	23 (4)
collagenase	group			0.00488	EGR1,JUN,JUNB	73 (7)
N-Cadherin	group			0.00311	CCND1,SOX11
Cop9 Signalosome	complex			0.0215	JUN
Ggtase I	complex			0.032	CCN1
dopamine receptor	group			0.00397	FOS,NR4A1	59 (7)
Osteocalcin	group			0.032	CCND1
SKA3	other			0.0425	PFKFB3
JPT2	other			0.032	CCND1
CERT1	kinase			0.0215	CCND1
ZNF24TR	other			0.0215	VEGFA
GON4L	transcription regulator			0.00968	CCND1,MYB
ADRA1	group			1.22e-05	EGR1,FOS,JUNB	147 (24)
CSF2RB	transmembrane receptor			0.000898	FOS,JUN,JUNB	101 (19)
AMOT	other			0.032	CCN1
ANTXR2	transmembrane receptor			0.00712	CCND1,VIM	76 (9)
CORO6	other			0.0425	CCND1
DIXDC1	other			0.0215	KDR
SOX2-OT	other			0.000254	CDH2,SOX2,VIM
RNY3	other			0.003	HES4,IFITM3,SPATS2L
MEG3	other			0.000414	HIF1A,JUN,VIM	73 (7)
Mir218	microRNA			0.00397	SFRP2,SPP1
Ren2	peptidase			0.0158	SPP1,VEGFA
JINK1/2	group			0.0414	CDH2,PARP1
BMP	group			0.003	ID1,KDR,SPP1	38 (5)
MEF2	group			0.0492	JUN,NR4A1
Pdgfr	group			0.00836	EGR1,VIM	96 (12)
G protein alpha i	group			0.0475	CCN1,FOS,IFITM3
SHP	group			0.0425	EGR1
Nos	group			0.000626	EGR1,FOS,VEGFA	145 (20)
G protein alpha	group			0.0196	CRMP1,DBI,FOS,FSTL5
Ctbp	group			0.0176	ACKR3,GADD45A
CaMKII	complex			0.00164	COL2A1,FOS,SOX9	146 (25)
IRS	group			0.032	VEGFA
Wnt	group			0.00151	CD24,CDH2,KDR,SOX9	49 (6)
Ras homolog	group			0.00143	CCND1,EGR1,FOS	123 (19)
p70 S6k	group			0.00333	CCND1,CDH2,VIM	149 (21)
RNA polymerase II	complex			7.29e-05	B2M,DUSP1,ENO1,FOS,GADD45A,GAPDH,ID1,JUN,JUNB,L1CAM,SPP1,VEGFA	129 (12)
Calcineurin A	group			0.000476	CCND1,FOS,JUN,TNNI1	131 (20)
Camk	complex			0.00169	CCK,KDR
ADCY	group			0.00212	CDH2,CRYM,FOS	95 (14)
Rap1	group			0.00598	CDH2,FOS	140 (25)
calpain	complex			0.0274	CAMK4,CCND1
PLD	group			0.000686	HIF1A,PTP4A3
Dynamin	group			0.00169	FOS,KDR	113 (14)
Mlcp	complex			0.0108	NR4A1
myosin-light-chain kinase	group			0.032	CCND1
caspase	group			0.0439	CCND1,CDK6
FKHR	group			0.032	CCND1
Fibrin	complex			0.0253	COL2A1,KDR
Ikb	group			0.0274	CCND1,NR4A1
Pde	group			0.00397	FOS,NR4A1	64 (12)
PKAr	group			0.0215	CCK
Aldose Reductase	group			0.0213	CCND1,E2F1
Histone h3	group			5.71e-11	ACKR3,B2M,CCND1,CD9,E2F1,EGR1,FOS,GAPDH,HES1,ID1,IFITM3,IGFBP2,JUN,KDR,L1CAM,MGLL,MTUS1,OTX2,PIK3R1,RUNX1T1,SCRT1,SOX11,SPATS2L,SPP1,TBX3,VEGFA	156 (20)
SERCA	group			0.00169	EGR1,JUN	106 (16)
NFAT (complex)	complex			0.003	NR4A1,SLC1A3,SPP1
ROCK	group			0.00274	CCND1,FOS,SOX9,SPP1	127 (23)
Rac	group			1.22e-05	CCND1,CD9,FOS,HIF1A	127 (22)
Gli	group			0.0253	CCND1,HIF1A
MSK1/2	group			0.000116	DUSP1,FOS	82 (7)
L-type Calcium Channel	complex			0.00397	EGR1,FOS	132 (25)
PLA2	group			0.0215	FOS
ETS	group			0.00187	CCND1,EGR1,FOS
growth factor receptor	group			0.0108	FOS
E2f	group			0.0478	E2F1,HIF1A,MYB,PCSK1N
INSC	other			0.0108	KDR
ZFAS1	other			0.000328	CDH2,NKD2,VIM
Stat1-Stat3	complex			0.032	FOS
Pdgf Ab	complex			0.000898	CCND1,FOS,HIF1A	128 (24)
Esr1-Esr1-estrogen-estrogen	complex			0.0425	HIF1A
G protein beta gamma	complex			0.032	CCN1
PLC	group			0.0158	FOS,NR4A1
JUN/JUNB/JUND	group			0.00333	CCN1,FOS,JUN	84 (12)
Esr1-Estrogen-Sp1	complex			0.032	FOS
Rxr	group			0.0352	BARHL2,GADD45A,KDM6B,SPP1
Nuclear factor 1	group			0.0439	FABP7,ID1
Angiotensin II receptor type 1	group			0.0158	HIF1A,VEGFA
collagen type i (family)	group			0.0364	CDH2,LUM
CRNDE	other			0.00913	NR4A1,VEGFA,VIM	121 (12)
NPS	other			0.0215	FOS
UQCC3	other			2.77e-05	ATP6V0B,ENO1,GAPDH,GPI,HIF1A,NDUFA4L2,PGK1,PKM,TPI1	90 (7)
PRKAA	group			0.0237	CCND1,DUSP1,VIM
Nfat (family)	group			0.0271	CCN1,CCND1,SMAD2,TNNI1
GC-GCR dimer	complex			0.00406	CDKN1C,DUSP1,PIK3R1
PRC2	complex			0.0142	KDR,TBX3,WIF1
NR2F1-AS1	other			2.42e-05	CCND1,CDH2,VIM
SNHG17	other			0.0108	SOX4
DBH-AS1	other			0.00493	CCND1,CDK6
G-Actin	group			0.0108	JUN
thyroid hormone receptor	group			0.0341	FOS,PTTG1
LINC00842	other			0.00169	CDH2,VIM	103 (15)
UBA6-DT	other			0.0108	PARP1
Rbx1	enzyme			0.0215	PTTG1
FAM83A-AS1	other			4.92e-06	HIF1A,LDHA,PKM
Smad	complex			0.000164	ID1,ID3,ID4,VEGFA
Igm	complex			0.0429	EGR1,ID3,ZFP36L1
Retinoic acid-RAR-RXR	complex			0.00311	DUSP1,RBP1
MAFA	transcription regulator			0.023	CCK,MIF,PAX6,TBX3,VEGFA
CLEC4G	other			0.0237	CDK6,GAS1,VEGFA
NLGN1	other			4.21e-05	CCND1,CDH2,L1CAM	123 (11)
CYTOR	other			0.0176	CDH2,VIM
Smr3b/Vcsa2	other			0.0215	HIF1A
FOXQ1	transcription regulator			2.42e-05	DACH1,NRXN3,VIM
HACE1	enzyme			0.0215	HIF1A
INTS11	enzyme			1.24e-06	EGR1,FOSB,NR4A1
BAALC	other			0.0425	CDH2
trypsin	group			0.000328	FOS,INA,MIF	52 (7)
ASB9	transcription regulator			0.0108	CKB
MUC15	other			0.0108	SOX2
FTO	enzyme			0.00852	CCND1,JUN,SOX2	132 (22)
NSD3	enzyme			2.42e-05	CCND1,CDH2,VIM
DIO3OS	other			0.0108	LDHA
LINC00930	other			0.0108	PFKFB3
MTO1	enzyme			4.21e-05	CCND1,CDH2,VIM
ZNF219	transcription regulator			0.032	COL2A1
MAGEA11	other			0.032	E2F1
SLC38A5	transporter			0.0108	KDR
CWH43	other			0.0108	L1CAM
TTYH3	ion channel			0.0425	CDH2
Fc gamma receptor	group			0.0465	CCND1,HES1
NCK	group			0.0108	CCND1
NADPH oxidase	complex			0.0253	FOS,JUN
STAMBPL1	enzyme			0.0108	DUSP1
PRAG1	kinase			0.032	HES1
NPSR1	G-protein coupled receptor			0.000686	GADD45A,NR4A1
KDM4D	enzyme			0.00836	CCND1,SOX9
ZBTB2	transcription regulator			0.0215	HIF1A
FICD	enzyme			0.00113	DNAJB1,HSPB1
TCHP	other			0.0215	VEGFA
CINP	other			0.0425	CCND1
PI4K2A	kinase			0.0215	HIF1A
FUNDC1	other			0.0108	KDR
FMOD	other			0.000116	HES1,LUM
Snhg6	other			1.22e-05	CCND1,E2F1,HIF1A
SFMBT1	transcription regulator			0.0465	ENO1,VEGFA
FOXD2-AS1	other			0.00836	CDH2,HES1
IRF2BP1	transcription regulator			0.00978	DUSP1,FOS,KDM6B
CNMD	other			0.0215	VEGFA
MRPS18B	other			0.00235	SOX2,VIM
FBXO31	enzyme			0.0215	CCND1
RHBDD1	peptidase			0.0425	VIM
HJURP	other			0.000141	CCND1,CDK6,VIM	126 (13)
EIF4A3	enzyme			0.00311	CCND1,ONECUT2
TET1	enzyme			0.00913	BSG,FOS,SOX2
THRAP3	transcription regulator			0.0126	CCND1,RARRES2
PDCD10	other			0.0111	HIF1A,VEGFA
DACT1	other			0.00113	CCND1,JUN	48 (7)
MFN1	enzyme			8.77e-06	GAPDH,GPI,LDHA,PKM	101 (7)
TLX3	transcription regulator			0.0176	ASCL1,CCK
ZNF276	transcription regulator			0.032	CCND1
DAND5	other			0.0425	SOX2
SENP7	peptidase			0.00397	CDH2,VIM
GSX2	transcription regulator			0.000328	ASCL1,PAX6,RBP1
BSCL2	other			0.0332	CCND1,MGLL,PYGL
NPC1	transporter			0.00531	APLP1,B2M,CCND1,EGR1,FABP5,PLP1	111 (13)
DIRAS2	enzyme			0.000686	CCND1,CDK6
SQSTM1	transcription regulator			0.0205	JUN,LHX2,TSC22D1
EIF2A	translation regulator			0.0274	IGFBP2,JUN
NIF3L1	other			0.0215	ASCL1
TOX	transcription regulator			0.0274	CDKN1C,ID3
MELK	kinase			0.000254	CDH2,SOX2,VIM	128 (18)
APLNR	G-protein coupled receptor			0.0213	CDH2,VIM
CBX7	other			0.00368	CCND1,CDK6,SOX2
Mir100hg	other			0.000345	CDH2,VIM
IP6K1	kinase			0.0215	ISYNA1
FOXL2	transcription regulator			0.0141	FOS,MYB,SOX4,SOX9
ZFP42	transcription regulator			0.0425	CCND1
ST6GALNAC1	enzyme			4.21e-05	B2M,CDH2,VIM
TRIM26	other			0.0108	SOX2
PAF1	other			0.0159	BAMBI,IFITM3,LRRN3
NSUN2	enzyme			0.00235	CCDC85B,PIK3R1
PSPH	phosphatase			0.0215	NR4A1
FA2H	enzyme			0.00397	CCN1,VIM	73 (7)
FBXO25	enzyme			0.000116	EGR1,FOS	33 (5)
SULF2	enzyme			0.0274	CCND1,COL2A1
ARMCX3	other			0.0215	CHRNA3
ZNF652	other			0.00397	SMAD2,VIM
PROP1	transcription regulator			0.0389	COL2A1,TLE3
MYEOV	other			0.0108	HES1
PCBP3	transcription regulator			0.0108	PFKFB3
DNAJB4	other			0.0425	CCND1
IDH3B	enzyme			0.0108	PFKFB3
SRF-ELK1	complex			0.0108	FOS
Gpcr	group			0.00113	FOS,JUN	128 (24)
CENPU	other			0.032	E2F1
NIBAN2	transcription regulator			0.000345	CCND1,PKM
HOXA-AS3	other			0.000686	CDH2,VIM
NSRP1	other			0.00113	CDH2,VIM	74 (7)
KIF21A	other			0.0108	MAP1B
ATOH7	transcription regulator			1.22e-05	BARHL2,SOX11,SOX4
AHI1	other			0.00269	CCNG2,CDKN1C,MLLT11
ZC3H14	other			0.0142	LHX2,TSC22D1
RBM17	other			0.032	SOX2
NOP58	enzyme			0.032	CCND1
LPAR5	G-protein coupled receptor			0.0215	CCK
AKIRIN2	other			0.00235	CCND1,DUSP1	77 (7)
AMOTL2	other			0.0425	CCN1
GLIPR2	other			0.0425	VIM
KLF17	transcription regulator			0.0126	ID1,VIM
CCDC65	other			0.0215	ENO1
CEMIP	enzyme			0.00598	CDH2,PTP4A3
RBM15	other			0.0215	HES1
KCNJ12	ion channel			0.0108	CCND1
LMX1B	transcription regulator			0.0253	COL2A1,HES1
BCAR4	other			4.21e-05	CDH2,PFKFB3,VIM	107 (7)
P4HTM	enzyme			0.00169	HIF1A,VEGFA	105 (13)
TUSC3	transporter			0.000686	CDH2,VIM	73 (7)
MGAT1	enzyme			0.00598	CDH2,VIM	41 (5)
GKN1	growth factor			0.0108	SOX9
MIEF2	other			0.00598	CDH2,VIM	73 (7)
CALCOCO1	transcription regulator			0.0108	CCND1
URGCP	other			0.0108	CCND1
ARHGAP35	transcription regulator			0.0108	KDR
ANKHD1/ANKHD1-EIF4EBP3	other			0.00836	CCND1,VEGFA	145 (19)
STAT1/3/5 dimer	complex			0.0295	FOS,JUNB
SIRT3	enzyme			0.0475	SOX2,VEGFA,VIM
RNASEH2A	enzyme			0.0177	ACKR3,IFITM3,JUNB
ACOT12	enzyme			0.000345	CDH2,VIM
PRDM5	transcription regulator			0.0147	MYB,NREP,PAX6,SOX2
PRKAG3	kinase			8.38e-05	ACKR3,EGR1,FTL,GADD45G,ID1,JPT1,JUNB,PPP1R14B,TMEM37
SOX17	transcription regulator			0.000533	CCND1,FOS,KDR,SOX2	150 (18)
PHF8	enzyme			0.00493	E2F1,ID1	90 (7)
PARP14	enzyme			0.00598	CCND1,ID3
SPRED2	cytokine			0.032	VIM
HP1BP3	other			0.0425	IGFBP2
MYOC	other			0.000385	DDIT4,FSCN1,PLP1,SOX11,SPP1,STC2
LINC00887	other			0.00113	CDH2,VIM
SETD1A	ion channel			0.00397	CCND1,SOX2
NAALADL2	other			0.00397	JPT1,SPON2
WAPL	other			0.0425	CCND1
PRR7	other			0.032	JUN
POLR2M	other			0.0295	CCND1,DDIT4
SERPINA6	other			3.99e-05	ARRB2,ATP1A3,BAMBI,FXYD1,FZD5,ID4,NKD2,PIK3R1,SFRP2,SMAD2
DLK2	other			0.032	HES1
HCAR1	G-protein coupled receptor			0.00164	BSG,LDHA,SLC16A3
TUSC7	other			0.032	CDK6
REM2	enzyme			0.0215	CCND1
RPRD1B	other			0.0215	CCND1
LEO1	other			0.000686	SOX2,SOX4
TMEM184A	other			0.0108	DUSP1
GPC6	transmembrane receptor			0.032	CCND1
TMPRSS6	peptidase			0.000626	CDH2,ID1,VIM	41 (5)
AKR1C1/AKR1C2	enzyme			0.00397	HIF1A,LDHA
WWC1	transcription regulator			0.00712	CDH2,VIM	73 (7)
ADGRG1	G-protein coupled receptor			0.0215	VEGFA
BCS1L	enzyme			0.032	HIF1A
NDUFAF3	other			0.032	CCND1
PYCR1	enzyme			0.00113	CDH2,VIM
TACSTD2	other			0.00397	CCND1,PARP1
ATE1	enzyme			0.00235	CCND1,JUN	107 (15)
Fascin	group			0.032	CCN1
CCDC88C	other			0.0215	CCND1
FOXK2	transcription regulator			0.00712	SOX2,VEGFA
TMTC3	enzyme			0.00235	CDH2,VIM
METTL1	enzyme			0.000898	CCND1,CDK6,VIM
LINC01018	other			0.00235	CCND1,VIM
GAMT	enzyme			0.0108	CKB
SEMA4A	other			0.0215	VEGFA
SNORD22	other			0.0111	CCND1,SMAD2
C1QL1	other			0.000345	FOS,NR4A1	88 (11)
ZMIZ2	transcription regulator			0.00113	CCND1,JUN
Histone h4	group			0.000243	CCND1,CHRNA3,E2F1,FOS,GAS1,HES1,KIF1A,SPP1	154 (20)
E2F8	transcription regulator			0.00836	CCND1,E2F1
TLE3	other			0.00855	CDH2,ETFB,MYB,SOX9,TLE4
PSMD14	peptidase			0.032	CCND1
ENKUR	other			0.0215	JUN
BHLH	group			0.0215	ST18
SLCO1C1	transporter			0.0425	VEGFA
SLC17A6	transporter			0.0108	NR4A1
RRP1B	transcription regulator			0.0323	ASCL1,CCND1,GADD45A,SPP1
NBR2	other			0.000686	CDH2,VIM	78 (6)
DPY30	other			0.000192	E2F1,ID1,ID3	77 (8)
TEX11	other			0.000686	CCND1,FOS	141 (18)
IL31	other			0.0318	CDK6,JUNB
USP35	peptidase			0.0425	CCND1
KDM4C	enzyme			0.00164	JPT1,SOX2,TTYH1
CIRBP	translation regulator			0.0364	CCND1,VEGFA
Crnde	other			0.00836	CCND1,VIM
CCDC62	transcription regulator			0.0108	CCND1
potassium channel	group			0.000345	FOS,JUN	35 (7)
endothelin receptor	group			0.0425	FOS
sGC	complex			0.00113	EGR1,FOS	159 (26)
STAT1/3 dimer	complex			0.0108	FOS
TCF/LEF	group			0.00187	CCND1,JUN,VIM
Ribosomal Subunit 80S	complex			0.032	EGR1
TSPYL5	other			0.0253	FBXW7,GATB
KCTD9	other			0.0425	CCND1
USP24	peptidase			0.0425	PTTG1
Slfn1	enzyme			0.0425	CCND1
NFKBID	transcription regulator			0.0111	CD9,CDH2
PHF20L1	other			0.0108	SOX2
CHIT1	enzyme			0.00311	SMAD2,VIM	41 (5)
RNF32-DT	other			0.032	CCND1
A1BG	other			0.0215	SOX2
COQ7	enzyme			0.032	HIF1A
SLC39A8	transporter			0.0364	CD9,FTL
GFPT2	enzyme			0.0215	VIM
RHOV	enzyme			0.0425	CDH2
MFN2	enzyme			0.0194	BNIP3,HIF1A
VGLL3	other			0.00123	SOX4,SOX9,SPP1
ZDHHC2	enzyme			0.00169	CD9,VIM
receptor protein tyrosine kinase	group			0.0425	SPP1
KLHL2	other			0.000345	CCND1,JUN	48 (7)
BATF2	transcription regulator			0.000116	CCN1,JUN	83 (7)
DSTYK	kinase			0.000345	CCND1,LDHA
FERMT3	enzyme			0.032	VEGFA
VENTX	transcription regulator			0.0215	CCND1
CTDSP1	phosphatase			0.00397	E2F1,VIM
BMPR2	kinase			0.00334	EPHA4,ID1,MAP1B,SPP1	88 (11)
AMOTL1	other			0.032	CCN1
ZNF322	transcription regulator			0.0215	CCND1
ORAI3	other			0.0425	CCND1
PNO1	other			0.00269	CCND1,CDH2,HES1
ADAP1	other			0.000328	FOS,JUN,NR4A1	126 (13)
FGF14	growth factor			0.0108	FOS
PCLAF	other			0.00488	E2F1,GADD45G,PTTG1
CTU1	other			0.0108	DEK
BEST4	other			0.0215	CCND1
PTF1A	transcription regulator			0.0282	KIRREL2,PRDM13,TFAP2B
GNPTAB	enzyme			0.0425	SOX9
Fcor	enzyme			0.00598	CCNG2,GADD45A	120 (12)
NSUN6	enzyme			0.00852	CCN1,ETV5,FSCN1
TMEM165	other			0.000328	COL2A1,ID1,SOX9
CTDSPL2	phosphatase			0.0215	ID1
DGCR5	other			0.00598	CDH2,VIM
MUCL1	other			0.0425	CCND1
PDCL3	other			0.0108	KDR
NELFCD	other			0.0142	BSG,JUNB
L2HGDH	enzyme			0.00968	HIF1A,LDHA
TRPM3	ion channel			0.000345	EGR1,FOS
EGLN2	enzyme			0.0158	HIF1A,LDHA
RAB23	enzyme			0.00113	COL2A1,SOX9
RADIL	other			0.032	VIM
DHCR24	enzyme			0.00836	CD9,IFITM3
PRR11	other			0.000328	CDH2,CDK6,VIM
PLAC1	other			0.0108	CCND1
PPM1E	phosphatase			0.000116	CDH2,VIM
LINC00324	other			0.00712	CD24,SOX2
KLHL21	enzyme			0.032	DUSP1
CUEDC2	other			0.0425	LDHA
DUOXA1	other			0.00493	NEUROD4,VIM
PTPN23	phosphatase			0.000345	CDH2,VIM
DEPTOR	other			0.00712	CDH2,VIM	73 (7)
PPP1R14B	phosphatase			2.42e-05	HIF1A,KDR,VEGFA
WDR4	enzyme			0.00493	CDH2,VIM
OLA1	enzyme			0.032	CCND1
FNDC5	other			0.0126	FNDC5,SPP1
KDM6B	enzyme			0.0492	CDH2,VIM
NSD2	enzyme			0.000809	FOS,GADD45A,JUN,VEGFA	148 (17)
RFX7	transcription regulator			0.0215	DDIT4
ZNF382	transcription regulator			0.00311	CDK6,ID1
MRGPRX1	G-protein coupled receptor			0.0215	EGR1
FANK1	transcription regulator			0.0108	JUN
CPEB2	translation regulator			0.0215	HIF1A
FRZB	other			0.0215	COL2A1
ELOVL3	enzyme			0.0415	ENO1,LUM,SPP1
SBDS	other			3.88e-08	CRMP1,CRYM,DNAJB1,EGR1,FOS,ID1,KIF1A,OTX2,SORCS1,SPP1
SNHG20	other			0.000192	CCND1,CDH2,VIM
AGAP2-AS1	other			0.0425	SOX2
OIP5-AS1	other			0.00106	CCND1,CDK6,OTX2
USP29	peptidase			6.68e-05	HIF1A,LDHA,PKM	121 (11)
DANCR	other			0.0111	CDH2,VIM
DACT3	other			0.0425	CCND1
HERC3	enzyme			0.00311	CDH2,VIM	105 (15)
PCIF1	enzyme			0.0108	FOS
ADAMTS9	peptidase			0.0215	VEGFA
TCF4-CTNNβ	complex			0.032	ID4
SOX2-OCT4-NANOG	complex			0.0232	PAX6,REST
Sapk	group			0.000686	FOS,GADD45A	101 (14)
ETS-ELK1	complex			0.0215	CCND1
CTNNβ-LEF1	complex			0.0215	CCND1
SMAD1/5	group			0.00397	ID1,ID3
PDS5B	other			6.68e-05	ASCL1,CDH2,SOX2
FERD3L	transcription regulator			0.0108	HES1
ROR1	kinase			0.00139	CCN1,ETV5,MAP1B,VIM	32 (3)
AHSA1	other			0.032	CDK6
GPD1L	enzyme			0.000345	HIF1A,LDHA
SMURF	group			0.032	SMAD2
48s	complex			0.0111	CCND1,VEGFA
Focal adhesion kinase	group			0.0439	CDH2,CDKN1C
Gcn5l	group			0.00598	B2M,E2F1	90 (7)
UBE2D3	enzyme			0.000345	CCND1,SMAD2	55 (7)
Endothelin	group			0.0158	FOS,JUN
Fetal Hemoglobin	complex			0.032	HIF1A
Collagen type I (complex)	complex			0.00695	CCND1,CDH2,KDR,VIM	122 (19)
TH1 Cytokine	group			0.00113	HIF1A,PPP1R14A
MAPK8IP3	other			0.0126	JUN,TF
EIF2B5	translation regulator			0.00446	DUSP1,TF,VIM	73 (7)
PDLIM1	transcription regulator			0.0425	VIM
IDH2	enzyme			1.21e-06	EGR1,HIF1A,JUN,LDHA,PKM,SOX4,VIM	111 (9)
OMG	G-protein coupled receptor			0.0215	FOS
ATP1A2	transporter			0.032	FOS
PRKDC	kinase			0.00629	CCND1,EGR1,PTTG1	118 (16)
MEF2D-NFAT2-p300	complex			0.0108	NR4A1
Integrin alpha 5 beta 1	complex			0.0108	CCND1
mediator	complex			0.0108	FOS
INTERLEUKIN	group			0.0215	FOS
Hspg	group			0.032	VEGFA
Ppp2c	group			0.00836	DUSP1,ID1	77 (7)
p85 (pik3r)	group			0.0158	HIF1A,VEGFA
Gap	group			0.032	FOS
Mapk kinase	group			0.0108	CCND1
ZNF467	transcription regulator			0.0425	FOS
CDH3	other			0.0364	CDH2,LIMCH1
Retnla	other			0.0126	HES1,HIF1A
UCN3	other			0.0215	VEGFA
EIF4H	translation regulator			0.0215	CCND1
MAPK8IP1	other			0.00164	CCND1,FOS,JUN	126 (20)
RRM2	enzyme			0.0176	HIF1A,VEGFA
PPP1R1B	phosphatase			0.0142	CCND1,FOS
NR0B1	ligand-dependent nuclear receptor			0.00978	LOXL1,REST,SOX9
MCC	other			0.032	PARP1
BCOR	transcription regulator			0.0196	BCL7A,COL2A1,GAS1
GAB2	other			0.00736	FOS,HIF1A,KDR	123 (19)
GFRA1	transmembrane receptor			0.0425	JUN
PMF1/PMF1-BGLAP	transcription regulator			0.0108	SAT1
DLL4	other			0.0159	HES1,KDR,VEGFA
MEIS2	transcription regulator			0.000191	ID1,ID3,PAX6,SOX11
MAX	transcription regulator			0.00058	CCNG2,E2F1,GADD45A,ID1,LRRN3,PTMA	73 (4)
ZNF202	transcription regulator			0.0194	PLP1,VEGFA
ARHGEF17	other			0.0108	FOS
RNMT	enzyme			0.0215	CCND1
RAB11FIP3	other			0.000686	FOS,JUN	74 (7)
FANCG	other			0.032	HES1
EEFSEC	translation regulator			0.0108	MSRB1
JMJD6	transmembrane receptor			0.00712	CCND1,HIF1A	134 (21)
ARHGEF1	other			0.00311	CCND1,FOS	129 (22)
MAPK13	kinase			0.0232	FOS,VEGFA
DIO1	enzyme			0.0425	SLC16A3
NCOR2	transcription regulator			0.0294	CCND1,FOS,JUN
SOX7	transcription regulator			0.00596	ASCL1,KDR,OTX2,SOX4
E2F5	transcription regulator			0.0295	E2F1,MYB
SRGAP1	other			0.032	CCND1
CHFR	enzyme			0.0425	PARP1
MCF2L	other			0.0215	CCND1
SCAP	other			0.0176	CYB5A,FABP5,HES6,ID1
PGF	growth factor			0.00978	EGR1,FOSB,HIF1A	145 (23)
LYL1	transcription regulator			0.000119	EGR1,ID1,ID3,ID4
FANCL	enzyme			0.0108	HES1
SERTAD1	transcription regulator			0.032	CCND1
Tenascin	group			0.0108	CCND1
Betacatenin/TCF	complex			0.0111	CCND1,JUN
ALOX12	enzyme			0.00712	JUN,VEGFA	139 (22)
NELFB	other			0.0213	GADD45A,VEGFA
PRKG2	kinase			4.21e-05	FOS,PLP1,SOX9	47 (4)
GPC3	other			0.032	CCND1
LHX2	transcription regulator			0.00269	PAX6,RARRES2,RAX
CCT2	kinase			0.0108	VEGFA
AURKA	kinase			0.0274	LDHA,SOX2
ZFYVE9	peptidase			0.0425	SMAD2
MAPK8IP2	other			0.0215	FOS
JAM3	other			0.032	CCND1
HDAC5	transcription regulator			0.0152	HES1,JUN,MEG3,NR4A1
VIP	other			0.0305	CCND1,FOS,SLC1A3,VIM
CCK	other			0.00187	EGR1,FOS,VEGFA	109 (23)
TFB1M	transcription regulator			0.0108	E2F1
FANCF	other			0.0215	HES1
C1QA	other			0.0492	EGR1,VIM
LCK	kinase			0.00116	EGR1,FOS,JUN,SOX2,VEGFA	115 (23)
TLCD3A	other			0.0425	CCND1
FANCA	other			0.00836	EGR1,HES1	48 (7)
SEMA3F	other			0.00113	HIF1A,VEGFA	60 (7)
ZFHX3	transcription regulator			5.96e-06	CCND1,ID3,IFITM3,MIF,PTTG1,RGS16,TUBA1B,VIPR2
DEF6	other			0.00187	CDH2,FOS,VIM	86 (11)
CSDE1	enzyme			0.0158	FABP7,VIM
LATS1	kinase			0.0168	CD24,SOX9,SPP1
GHRH	other			0.0295	CCND1,FOS
WDR48	other			0.00169	CDH2,VIM	73 (7)
Til1	other			0.032	SPP1
NTF4	growth factor			0.0126	FOS,SPP1
PAK4	kinase			0.00836	CDH2,VIM	73 (7)
S100B	other			0.0176	FOS,JUN
APBA3	transporter			0.00311	PGK1,VEGFA
RRAD	enzyme			0.032	CCND1
PSMD9	transcription regulator			0.0108	SMAD2
AKAP12	transporter			0.00397	CCND1,HIF1A	121 (14)
CDH11	other			0.00406	CD9,PIK3R1,TFAP2C
MBNL1	other			0.00712	SOX2,SOX4
ELL	transcription regulator			0.032	FOS
GNA14	enzyme			0.00109	BNIP3,GADD45A,NR4A1,VEGFA,ZFP36L1
SETBP1	transcription regulator			0.00156	CCND1,ETV5,FBXW7,KDR,MYB
JUNB	transcription regulator			0.0286	CCND1,DUSP1,HES1,JUNB,TBX3
MED12	transcription regulator			0.00187	ASCL1,CREB5,SMAD2
CD244	transmembrane receptor			0.00493	EGR1,FOS	125 (22)
FGF20	growth factor			0.0215	SOX2
CCN4	other			0.0158	CCND1,CDH2
NOP2	other			0.0142	CCNG2,SLC1A3
PCSK9	peptidase			0.0492	CD9,IFITM3
VAMP7	transporter			0.032	L1CAM
GLRX	enzyme			0.00397	HIF1A,VEGFA	121 (12)
CDC25B	phosphatase			0.0425	CCND1
PMP22	other			0.0232	JUN,SOX2
EHD1	other			0.000328	CCND1,CDH2,VIM	73 (7)
CITED4	transcription regulator			0.0108	HIF1A
TLX1	transcription regulator			0.00333	CCK,KDR,MYB
ADRA2B	G-protein coupled receptor			0.0425	CCND1
PXDN	enzyme			0.000754	DDIT4,DUSP1,JUN
CBS/LOC102724560	enzyme			0.0253	CDH2,VIM
DLL1	enzyme			0.00736	CDH2,EPHA4,HES1	86 (7)
FGF4	growth factor			0.00239	FOS,PTTG1,VEGFA	96 (20)
PTPRF	phosphatase			0.0425	CCND1
OPRK1	G-protein coupled receptor			0.00169	FOS,KDR	79 (11)
MAT2B	enzyme			0.032	CCND1
POLR2A	enzyme			8.56e-05	ASCL1,CCND1,FOS,GAPDH,STC2,VIM
SCN1A	ion channel			0.0215	VIM
ARTN	growth factor			0.0425	CD24
DAPK3	kinase			0.0215	CCND1
KIFAP3	other			0.0108	FOS
DNMT1	enzyme			0.0297	CCND1,CDH2,SFRP2,VIM
MAP3K12	kinase			0.0389	JUN,STMN4
GRK3	kinase			0.00235	CCN1,SOX9	29 (3)
FABP3	transporter			0.003	EGR1,FOS,VEGFA	149 (19)
ITGA8	other			0.032	LOXL1
EFNA5	kinase			0.0177	ETV5,FABP5,SOX9
NCAPD3	other			0.0215	E2F1
IL2RA	transmembrane receptor			0.0274	FOS,JUN
TFDP1	transcription regulator			0.000594	CCND1,E2F1,MYB,PTTG1	92 (9)
CAMKK1	kinase			0.0215	FBXW7
HOXA13	transcription regulator			0.000242	ENO1,EPHA4,SOX2,SOX9,TBX3
AGR2	other			0.00235	EGR1,FOS	73 (7)
GH2	other			0.0425	PIK3R1
NODAL	growth factor			0.0389	CCND1,CCNG2
HAND1	transcription regulator			0.0492	DBI,KDR
CDK9	kinase			0.0248	FOS,STC2,VIM
CYP1A2	enzyme			0.0134	CCND1,IGFBP2,RGS16
TAF4	transcription regulator			0.00387	CCND1,GAS1,LUM,SFRP2,SPP1
ALDH1A2	enzyme			0.0465	CCN1,SPP1
ETV4	transcription regulator			0.00792	MYB,SPP1,VIM
LOXL2	enzyme			0.00968	SOX9,VIM
SEL1L	other			0.00143	PAX6,RHEB,SOX2
IL24	cytokine			0.0168	CCND1,GADD45A,GADD45G
FSHR	G-protein coupled receptor			0.0237	DUSP1,FABP5,VEGFA
PPY	other			0.0108	FOS
SIM2	transcription regulator			0.00143	BNIP3,CDH2,GADD45A
SEMA3D	other			0.032	CCND1
RAC3	enzyme			0.0215	CCND1
BMP15	growth factor			0.0253	ID1,ID3
MYOCD	transcription regulator			0.0183	COL2A1,FOS,TNNI1,VEGFA
PROK2	other			2.42e-05	FOS,HIF1A,VEGFA	121 (12)
IDH1	enzyme			0.0307	EGR1,PGK1,VIM
POU2F1	transcription regulator			0.00221	CCND1,DDIT4,GADD45A,HOMER3,SELENOP,SPP1	117 (10)
CDH2	other			0.00187	CCND1,JUN,VIM	134 (21)
AGTR2	G-protein coupled receptor			0.0465	FOS,PIK3R1
PDGF (family)	group			0.0111	JUN,VIM
GAS5-AS1	other			0.0215	SMAD2
TMEM161B-DT	other			0.00169	HIF1A,LDHA
CBR3-AS1	other			4.21e-05	CCND1,CDH2,VIM
SDCBP2-AS1	other			0.032	CCND1
LINC01133	other			0.00169	CCND1,CDK6
LUCAT1	other			0.00406	CDKN1C,MGLL,SAT1
TUNAR	other			0.0108	SOX2
RAB11B-AS1	other			0.0215	VEGFA
CCAT1	other			0.00712	CDH2,VIM	73 (7)
FGD5-AS1	other			0.0425	VIM
EZR	other			0.0058	CDH2,DDIT4,IGFBP2	86 (7)
PTBP1	enzyme			0.0295	LDHA,PKM
EN1	transcription regulator			0.0126	CCND1,PAX6
DLX1	transcription regulator			0.0386	SOX2,VIM,ZFP36L1
CTNND1	other			0.00493	CDH2,VIM	71 (10)
GPHA2	other			0.0108	FOS
UBD	other			0.0194	CDH2,VIM
CCKBR	G-protein coupled receptor			0.00106	CDH2,HIF1A,PTF1A
ZIC2	transcription regulator			0.00397	CCND1,EPHA4
PDE1C	enzyme			0.0425	SOX2
DMP1	other			0.0126	BZW2,SLC6A9,SPP1
NEUROG2	transcription regulator			0.000732	ASCL1,OTX2,PAX6,SOX9
DMD	other			0.00991	GATM,PKM,PPP1R14C,SELENOP,TNNI1,TPI1,VIM
PRKG1	kinase			0.00488	CCND1,FOS,ID1	118 (23)
RIPPLY2	other			0.032	EPHA4
KLHL40	other			0.0215	BNIP3
HMGN1	transcription regulator			0.00368	FOS,FOSB,SOX9	47 (4)
LIMS1	other			0.00968	CRMP1,HIF1A
U2AF2	other			0.032	CCND1
TARDBP	transcription regulator			0.0108	CRMP1,HIF1A,MIAT,PLP1,SFRP2
CD24	other			0.00636	FOS,HOMER3,JUN,MCAM,MTUS1	73 (11)
CIC	transcription regulator			0.00712	CCND1,ETV5	7 (2)
SLPI	other			0.0318	CCND1,SMAD2
NMB	other			0.000686	FOS,JUN	149 (23)
FBLN2	other			0.0425	VEGFA
ARHGAP31	other			0.0492	CDH2,JUN
H1-2	other			0.000626	CCND1,GADD45A,GAPDH
ADCY2	enzyme			0.0108	CCND1
VASP	other			0.00968	CCND1,HIF1A	88 (7)
UBA1	enzyme			0.00212	CCND1,HSPB1,VIM
NUMB	other			0.003	CDH2,HES1,VIM	73 (7)
MPZ	other			0.00187	JUN,SOX2,SOX4
PDGFA	growth factor			0.00493	EGR1,SOX2
ADAMTS7	peptidase			0.0108	SOX9
RAX	transcription regulator			0.000626	HES1,OTX2,RLBP1
SLC40A1	transporter			0.000754	BNIP3,NDUFA4L2,PGK1
EIF3E	translation regulator			0.0119	APLP1,CCND1,DYNC1H1
ARID1B	transcription regulator			0.0425	FOS
MBIP	other			0.00493	JUN,PAX6
PTK2	kinase			0.00565	CCN1,CCND1,FOS,SPP1	124 (27)
FOXP3	transcription regulator			0.001	EGR1,FOS,GAPDH,JUN,LDHA,NR4A1,SLC16A3,VEGFA	156 (23)
NEUROD1	transcription regulator			0.027	PAX6,PKM,ST18
FLI1	transcription regulator			0.00628	CCND1,EGR1,LDHA,VEGFA	80 (10)
RLIM	enzyme			0.00598	CDH2,VIM	41 (5)
ZFPM2	transcription regulator			0.0126	KDR,SOX9
MAP3K3	kinase			0.0318	FOS,JUN
DAB2IP	other			0.00598	EGR1,VIM	129 (15)
NGFR	transmembrane receptor			0.00852	CCND1,FOS,JUN	133 (23)
CCT4	other			0.0108	VEGFA
DAB2	other			0.00235	CCND1,FOS	106 (21)
DUSP4	phosphatase			0.00836	DUSP1,SMAD2	90 (12)
LIPC	enzyme			0.00598	CDH2,VIM	73 (7)
ELP3	enzyme			0.00311	DEK,SOX9
TEAD3	transcription regulator			0.0186	CCN1,LIMCH1,LOXL1
PHF19	other			0.0425	OTX2
ROCK1	kinase			0.0414	CCND1,E2F1
CHRM3	G-protein coupled receptor			0.000254	CCN1,EGR1,FOS	123 (20)
ENO1	enzyme			0.000141	CDH2,ENO1,VIM	120 (12)
SLC7A11-AS1	other			0.00169	CCND1,JUN
SMC3	other			0.0111	CCNG2,SOX4
PNN	other			0.0126	BSG,JUN
MIR129	group			0.0425	CDK6
MIR101	group			0.00106	CCDC88A,DUSP1,VEGFA	97 (7)
APBB1	transcription regulator			0.0111	CCND1,HES1
MIR124	group			0.00629	CDK6,REST,VIM
MDM4	transcription regulator			0.00446	E2F1,NKD2,VIM	101 (7)
miR-338-5p (miRNAs w/seed ACAAUAU)	mature microRNA			0.0429	RHEB,SPRY2,WIF1
mir-622	microRNA			0.0215	HIF1A
mir-190	microRNA			0.00311	CCND1,VIM
MIR499B	microRNA			0.0108	HIF1A
mir-675	microRNA			0.032	COL2A1
miR-507 (and other miRNAs w/seed UUUGCAC)	mature microRNA			0.0104	CDKN1C,CHRNA3,LUM
miR-508-3p (miRNAs w/seed GAUUGUA)	mature microRNA			0.0386	DNAJB1,TFAP2B,VIM
mir-9	microRNA			0.003	NR2E1,PAX6,RUNX1T1
mir-322	microRNA			0.0158	CDH2,VIM
mir-27	microRNA			0.0475	E2F1,FBXW7,SPRY2
mir-7	microRNA			0.00269	CDH2,HIF1A,VIM
miR-34a-3p (miRNAs w/seed AAUCAGC)	mature microRNA			0.04	DUSP1,FOS,JUN
miR-548d-3p (and other miRNAs w/seed AAAAACC)	mature microRNA			0.0492	CCDC34,LOXL1
mir-541	microRNA			0.000141	CCND1,CDH2,VIM
miR-878-5p (miRNAs w/seed AUCUAGU)	mature microRNA			0.0058	CHRNA3,NREP,PAX6
miR-547-3p (miRNAs w/seed UUGGUAC)	mature microRNA			0.0415	CCDC34,CDH2,ONECUT2
miR-1307-3p (miRNAs w/seed CUCGGCG)	mature microRNA			0.0186	CABP1,SOX8,TAGLN3
mir-26	microRNA			0.0389	CDK6,PFKFB3
mir-379	microRNA			0.000754	CDH2,HIF1A,VEGFA
miR-129-5p (and other miRNAs w/seed UUUUUGC)	mature microRNA			0.0294	CDH2,SOX2,SOX4
mir-129	microRNA			0.0215	SOX2
mir-329	microRNA			0.00235	CCND1,DDIT4
mir-31	microRNA			0.0439	BAMBI,SPP1
mir-140	microRNA			2.86e-07	BNIP3,HIF1A,PGK1,SOX2,VEGFA,VIM
mir-194	microRNA			0.0126	DACH1,E2F1
mir-455	microRNA			0.0111	CCND1,RUNX1T1
mir-135	microRNA			0.00681	CDH2,HIF1A,SPP1
mir-103	microRNA			0.0295	CDK6,HIF1A
mir-612	microRNA			0.00113	CDH2,VIM
miR-3112-3p (miRNAs w/seed AGUUUGU)	mature microRNA			0.0186	ASCL1,CREB5,SCG3
mir-138	microRNA			0.0425	VIM
miR-142-5p (and other miRNAs w/seed AUAAAGU)	mature microRNA			0.0429	CCNG2,CDK6,VIM
mir-124	microRNA			0.0492	LHX2,SOX9
mir-378	microRNA			0.0126	CRAT,VIM
mir-942	microRNA			0.00169	CCND1,VIM
miR-694 (miRNAs w/seed UGAAAAU)	mature microRNA			0.0414	PCLAF,RHEB
mir-199	microRNA			0.0126	HIF1A,VEGFA
mir-944	microRNA			0.000116	CDH2,VIM
miR-330-3p (and other miRNAs w/seed CAAAGCA)	mature microRNA			0.0415	E2F1,GAL,NKD2
MIR3662	microRNA			0.00113	CCND1,HIF1A
miR-5100 (miRNAs w/seed CGAAUCC)	mature microRNA			0.0168	ETV5,SLCO3A1,TFAP2C
miR-4731-3p (and other miRNAs w/seed ACACAAG)	mature microRNA			0.0307	LDHA,PPP1R14A,SMIM20
miR-638 (miRNAs w/seed GGGAUCG)	mature microRNA			0.0332	FOSB,PTMS,SOX2
mir-3622	microRNA			0.0126	CCND1,GADD45A
miR-3617-5p (and other miRNAs w/seed AAGACAU)	mature microRNA			0.0359	CCNG2,HILPDA,MARCKSL1
MIR585	microRNA			0.0215	PARP1
ADAM12	peptidase			0.0475	JUNB,LUM,SFRP2
KISS1	other			0.00269	EGR1,FOS,OTX2	147 (23)
EED	transcription regulator			0.0111	IGFBP2,TBX3,WIF1
HGS	other			0.00164	FOS,JUN,SOX2	136 (24)
MAPK15	kinase			0.032	JUN
mir-150	microRNA			0.0126	HIF1A,MIAT,MYB
BMI1	transcription regulator			8.56e-05	BNIP3,FBXW7,ID4,MEG3,ST18,VIM	92 (7)
SOX6	transcription regulator			0.0341	CCND1,COL2A1
PLK1	kinase			0.00313	ACKR3,CDH2,PIK3R1,VIM	141 (15)
SMARCD2	transcription regulator			0.0108	CDKN1C
ATOX1	transporter			0.032	CCND1
RMRP	other			0.0194	COL2A1,SOX9
GHRHR	G-protein coupled receptor			0.0111	CCND1,FOS
CBFA2T2	transcription regulator			0.0425	HES1
HTR1A	G-protein coupled receptor			0.00598	CDH2,VIM	121 (24)
SNRPB	other			0.00235	CCND1,LDHA
SPRY4-IT1	other			0.00493	CDH2,VIM
HPX	transporter			0.0126	COL2A1,SOX9
DKK2	other			0.00397	CCND1,SPP1	18 (3)
COPS4	peptidase			0.0215	STON2
NID1	other			0.0215	PTPRF
PDE3A	enzyme			0.00235	CCND1,DUSP1	104 (12)
MRAS	enzyme			0.000192	CCND1,SPRY2,VIM	144 (24)
CSF2RA	transmembrane receptor			0.000328	FOS,JUN,JUNB	117 (21)
HOXB2	transcription regulator			0.032	OTX2
BTG3	other			0.0215	KDM6B
MB	transporter			0.00397	HIF1A,VEGFA	119 (13)
FYN	kinase			0.015	DUSP1,FOS,PLP1
EIF4G1	translation regulator			0.0295	GADD45A,HIF1A
POLE2	enzyme			4.21e-05	CCND1,CDH2,VIM	113 (7)
IRAK4	kinase			2.55e-05	EGR1,FOS,FOSB,IER2,JUN,NR4A1,RGS16	126 (19)
LTBP1	other			0.003	COL2A1,SMAD2,SOX9	55 (7)
PRKCZ	kinase			0.00736	CCND1,JUN,VEGFA	143 (26)
SMURF1	enzyme			0.0194	NR4A1,SMAD2
MED16	transcription regulator			0.00836	CCN1,VIM
HBP1	transcription regulator			0.0142	CCND1,PKM
PSG1	other			0.0215	VEGFA
PRKCG	kinase			0.027	CAMK4,CCND1,MAP1B
RTN4	other			0.000438	DYNC1H1,INA,JUN,TAGLN3,VEGFA	76 (7)
SFRP4	transmembrane receptor			0.00406	CCND1,SFRP2,VIM	72 (7)
NPVF	other			0.0108	FOS
EEF1D	translation regulator			0.032	COL2A1
HIF1A-AS1	other			0.032	HIF1A
HIF1A-AS2	other			0.0425	CDH2
MIR5590	microRNA			0.0215	VIM
RBM5-AS1	other			0.000513	CCND1,JUN,SOX2	74 (7)
NECAB2	other			0.0108	VSX2
HDAC3	transcription regulator			3.1e-06	CCND1,CDH2,ENO1,FOS,LDHA,PGK1,PKM,SPP1,VIM	137 (17)
miR-5100 (miRNAs w/seed UCAGAUC)	mature microRNA			0.0372	BZW2,MAP1B,PCSK1N
miR-4524b-3p (miRNAs w/seed AGACAGG)	mature microRNA			0.00269	ATP6V0B,HILPDA,STMN4
GSN	other			0.0158	COL2A1,SOX9
SMARCD3	transcription regulator			0.00187	COL2A1,SOX2,SOX9	91 (11)
GBP1	enzyme			0.0425	KDR
KCNQ1	ion channel			0.032	CDKN1C
ATN1	transcription regulator			2.48e-09	ATP1A3,BASP1,CAMK4,FBXW7,MARCKSL1,MCAM,NREP,PTPRF,RGS16,SOX11,SOX4,SPP1,TAGLN3
EPHB4	kinase			0.0216	INA,KDR,PLP1
SALL1	transcription regulator			0.0215	VEGFA
PTH1R	G-protein coupled receptor			0.00488	CCND1,DUSP1,SPP1	98 (12)
WNT7A	cytokine			0.0274	CDH2,VIM
DRD1	G-protein coupled receptor			1.22e-05	EGR1,FOS,FOSB,JUNB	147 (23)
SEMA3A	other			0.000141	KDR,MAP1B,MCAM
ANXA2	other			0.0058	CDK6,GADD45A,JUN	82 (12)
ANKH	transporter			4.92e-06	COL2A1,SOX9,SPP1	107 (13)
EEF1G	translation regulator			0.0108	VIM
TLE1	transcription regulator			0.000414	DUSP1,EGR1,FOS	73 (7)
FOXF1	transcription regulator			0.00488	CCND1,CDK6,KDR
EMX2	transcription regulator			0.00311	PAX6,SOX2
EIF2S1	translation regulator			0.0216	CCND1,GADD45A,SLC6A9
NKX6-1	transcription regulator			0.0126	E2F1,NR4A1
IGFBP5	other			0.00269	CCND1,EGR1,PFKFB3	39 (7)
STK3	kinase			0.000754	CCND1,SOX4,SPP1	80 (8)
BORCS8-MEF2B	transcription regulator			0.0108	JUN
PPARGC1B	transcription regulator			0.00767	CCND1,CKB,ENO1,VEGFA	116 (11)
HCRT	other			0.00493	EGR1,FOS	129 (19)
HS6ST1	enzyme			6.68e-05	SMAD2,SPRY2,VEGFA	42 (5)
WIF1	other			0.00598	SFRP2,VEGFA
MAPK12	kinase			0.00164	CCND1,FOS,JUN	122 (19)
GAS5	other			0.0213	CCND1,CDK6
HEIH	other			0.00368	DUSP1,FOS,JUN	52 (7)
ETV1	transcription regulator			0.000375	ASCL1,E2F1,SOX9,VIM
L3MBTL2	transcription regulator			0.00235	GPC2,PODXL2
SUMO1P3	other			6.68e-05	CCND1,VEGFA,VIM
H2AX	transcription regulator			0.000165	GADD45A,HIF1A,PKM,SFRP2,VEGFA	99 (7)
EGR4	transcription regulator			0.00311	EGR1,MYBL1
CCNDBP1	other			0.0215	CCND1
ATXN1	transcription regulator			0.0492	ETV5,VEGFA
ATM	kinase			0.00124	CCND1,DUSP1,GADD45A,GADD45G,JUN	111 (16)
WNT5B	other			0.00598	CCND1,COL2A1	90 (7)
IRS2	enzyme			0.00427	CCND1,EGR1,FOS,VEGFA	134 (24)
ITGA9	other			0.0232	CDH2,VIM
HDAC7	transcription regulator			0.0274	CCND1,NR4A1
ANGPT1	growth factor			0.0134	CCND1,DUSP1,VEGFA
HEXIM1	transcription regulator			0.00269	CCND1,HIF1A,VIM	157 (21)
H2AB3 (includes others)	other			0.0177	CDKN1C,FOS,GAS1
RLN2	other			0.0274	FOS,VEGFA
CHADL	other			0.0389	COL2A1,SOX9
CYP4F2	enzyme			0.00397	KDR,VEGFA	61 (7)
SEPTIN9	enzyme			0.00113	CCND1,HIF1A
MFSD8	other			0.032	PFKFB3
HDAC9	transcription regulator			0.0364	JUN,NR4A1
SERPINB3	other			0.00493	CD9,VEGFA
SGO1-AS1	other			0.00311	CDH2,VIM
HOXC-AS3	other			0.00235	LDHA,PKM
GNAI3	enzyme			0.0213	SPP1,VEGFA
TOB2	other			0.0108	CCND1
FABP4	transporter			0.0414	CCK,FABP5
WWP2	enzyme			0.0142	SOX2,VIM
SRSF1	other			0.0492	VEGFA,VIM
DTX1	transcription regulator			0.003	EGR1,SPP1,VEGFA	141 (23)
RALGDS	other			0.000345	CCND1,E2F1	96 (7)
GNB2	enzyme			0.00736	DUSP1,FOSB,NR4A1
ELK4	transcription regulator			9.97e-05	EGR1,FOS,JUNB,NR4A1	67 (10)
LIPE	enzyme			0.0236	EGR1,FOS,GAPDH,NR4A1,SCARB2
ZBTB48	transcription regulator			0.00446	ACKR3,FOSB,SPP1
HOXC8	transcription regulator			0.00629	GAS1,SLC16A3,SPP1
SUB1	transcription regulator			1.35e-05	CCND1,FOS,GADD45A,STMN2,VEGFA	80 (6)
NCOA5	other			0.0186	GADD45G,MYBL1,NR4A1
FGF10	growth factor			0.000315	PTF1A,S100A6,SOX2,SOX9,SPRY2	90 (11)
VAV1	transcription regulator			0.000331	CCND1,FOS,JUN,VEGFA	136 (23)
RBP7	other			0.0108	RBP1
BCAR1	other			0.00836	CCND1,EGR1	130 (25)
XIAP	enzyme			0.003	CCND1,CDH2,CDK6	148 (21)
TNFRSF11A	transmembrane receptor			0.0232	SOX2,TFAP2B
SCN1B	ion channel			0.00397	FOS,VIM
DDB2	transcription regulator			0.00712	E2F1,VEGFA	129 (11)
GCLC	enzyme			4.92e-06	FOS,JUN,JUNB	101 (7)
HOXB13	transcription regulator			0.0389	CCND1,EPHA4
LNX2	other			0.00598	HES1,HES6
SERPINF1	other			0.00378	CCND1,LOXL1,RLBP1,VIM	134 (17)
ALK	kinase			7.22e-05	CDH2,FOS,HOMER3,ID4,SOX2,STMN4	118 (19)
SEMA3C	other			0.032	PLXNA2
ELAVL2	other			0.032	NR2E1
MBD3	other			0.00195	CCND1,FZD5,PAX6,SFRP2,TLE5
IL36G	cytokine			0.0415	DUSP1,JUN,VEGFA
GPI	enzyme			0.0158	CCND1,VIM
MGAT4A	enzyme			0.032	CCND1
RETN	other			0.0307	FABP5,FOS,SPP1
PDE4B	enzyme			0.00836	DUSP1,SOX2
NR5A1	ligand-dependent nuclear receptor			0.04	GAL,SOX9,VIM
RACK1	enzyme			0.0414	FOS,HIF1A
MAP2K2	kinase			1.13e-05	E2F1,ETV5,FOS,HIF1A,VEGFA	139 (21)
PTBP3	other			0.00397	CDH2,VIM
TNFAIP2	other			0.000626	LHX2,SLCO3A1,VIM
GALR1	G-protein coupled receptor			0.000686	CCND1,CDKN1C
GHR	transmembrane receptor			0.0307	CCND1,IGFBP2,SPP1
USP14	peptidase			0.000192	E2F1,HIF1A,VEGFA	149 (16)
MYBL2	transcription regulator			0.0205	CCND1,CCNG2,ID1
SOX1	transcription regulator			0.0444	DUSP1,HES1,VEGFA
Neat1	other			0.032	LDHA
MLH1	enzyme			0.00493	BNIP3,CCND1
TGFB1I1	transcription regulator			0.0274	FOS,ID1
EFEMP1	enzyme			0.00311	VEGFA,VIM	119 (14)
ZBTB7A	transcription regulator			0.00629	FOS,PFKP,PKM
ARRB2	other			0.000809	EGR1,HIF1A,JUNB,VEGFA	130 (24)
TRIM3	enzyme			0.0213	CCND1,VEGFA
ADRA1B	G-protein coupled receptor			4.29e-08	CCND1,DUSP1,EGR1,FABP5,FOS,JUN,NR4A1,VEGFA	125 (21)
MAPK10	kinase			0.0126	FOS,JUN
AKR1B1	enzyme			0.0158	CCND1,E2F1
MECP2	transcription regulator			1.43e-06	BSG,CYB5A,E2F1,EGR1,FXYD1,INA,JUNB,NR4A1,PLP1,REST,VEGFA,VIM	133 (22)
GNA12	enzyme			0.011	FOS,PIK3R1,VEGFA,VIM
LDLR	transporter			8.02e-05	CCND1,DUSP1,EGR1,FABP5,GADD45G,GAPDH,GATM,GPI,MIF,PARP1,SPP1	142 (21)
ADRA1A	G-protein coupled receptor			1.39e-06	DUSP1,EGR1,FABP5,FOS,JUN,NR4A1,VEGFA	111 (23)
MAOA	enzyme			0.0058	CCN1,CCND1,VIM	73 (7)
MFGE8	other			0.0111	CCND1,CDH2
DHX9	enzyme			0.00533	CCND1,CREB5,PARP1	106 (7)
EIF2B1	translation regulator			0.032	CCND1
KCNE3	ion channel			0.00661	FABP5,FOSB,NR4A1,PLP1
ADRA1D	G-protein coupled receptor			7.93e-07	DUSP1,EGR1,FABP5,FOS,JUN,NR4A1,VEGFA	138 (23)
TNR	other			0.0108	SLC1A3
HHEX	transcription regulator			0.00913	CCN1,KDR,VEGFA	48 (7)
CRYAB	other			0.00333	CCND1,COL2A1,VEGFA	90 (7)
HMMR	transmembrane receptor			9.93e-05	CDH2,SOX2,VIM	128 (17)
ITGB4	transmembrane receptor			0.00239	CCND1,VEGFA,VIM	148 (22)
RALY	transcription regulator			0.0215	E2F1
FTMT	enzyme			0.032	FTL
STK16	kinase			0.0425	VEGFA
CLCA2	ion channel			0.00712	CDH2,VIM
AHNAK	other			0.0425	CCND1
MGAT3	enzyme			0.0126	CDH2,HES1
NT5E	phosphatase			0.0274	KDR,SPP1
IL2RG	transmembrane receptor			0.0332	CXXC5,FOS,JUN
KIF3A	enzyme			0.0253	COL2A1,VEGFA
NASP	other			0.0425	CCND1
PER1	transcription regulator			0.0213	B2M,CCND1
ATXN7	other			0.0158	BASP1,SLC1A3
SLC1A2	transporter			0.0108	FOS
GTPBP4	enzyme			0.0108	CCND1
RAC2	enzyme			8.24e-08	CDH2,FOS,LDHA,MIF,NR4A1,PKM,S100A6,TSC22D1	128 (18)
AXIN1	other			0.0232	CCND1,FOS
BCAN	other			0.0215	CDH2
TRAF4	other			0.00143	CCND1,JUN,SOX2	128 (21)
ITGA6	transmembrane receptor			0.0232	VEGFA,VIM
SP4	transcription regulator			0.0159	CCND1,CHRNA3,VEGFA
OGG1	enzyme			0.0111	HIF1A,VIM
JAG2	growth factor			0.00852	HES1,MIF,SPP1
ARHGEF28	other			0.0215	FOS
DLGAP1	other			0.00113	CDH2,VIM
ARAF	kinase			0.00311	CCND1,FOS	144 (21)
KCNJ10	ion channel			0.0194	GADD45A,IGFBP2
SETD7	enzyme			0.00493	CCND1,SOX2	137 (15)
NRG2	growth factor			1e-10	BNIP3,CCN1,E2F1,EGR1,FOSB,HES1,IER2,JUNB,NR4A1,SOX2,VEGFA	136 (16)
KIDINS220	transcription regulator			0.00113	EGR1,FOS	99 (13)
GPHB5	other			0.0108	FOS
IQGAP2	other			0.000414	CCND1,SFRP2,WIF1
OMP	other			0.0108	CCK
FCGR2A	transmembrane receptor			0.0216	IFITM3,MARCKSL1,VEGFA
miR-6416-3p (miRNAs w/seed CAAAGAG)	mature microRNA			0.0414	ORAI2,SAT1
miR-6344 (miRNAs w/seed UUUUCCU)	mature microRNA			0.00978	FAM111A,LHX2,SOX2
miR-6364 (miRNAs w/seed CGAUCCC)	mature microRNA			0.0475	H4C3,L1CAM,TFAP2C
miR-6362 (miRNAs w/seed UGGGCAU)	mature microRNA			0.04	CRAT,DDHD1,NHLH1
miR-6239 (and other miRNAs w/seed AGCGUUG)	mature microRNA			0.0307	CELF4,H4C3,TLE5
miR-6125 (miRNAs w/seed CGGAAGG)	mature microRNA			0.0142	BCL7A,FOSB,TMEM37
miR-6068 (miRNAs w/seed CUGCGAG)	mature microRNA			0.0345	DPYSL4,PFKFB3,SOX8
ABCC9	ion channel			0.0425	HIF1A
ZNF197	transcription regulator			0.0215	HIF1A
KIF23	other			0.032	CCND1
SOCS3	phosphatase			0.0224	CCND1,EGR1,FOS,JUN
NDRG2	other			0.00968	CD24,VIM
SCN7A	ion channel			0.0108	FOS
RNF7	enzyme			0.0108	JUN
CCT5	other			0.032	VEGFA
DLL3	other			0.0425	HES1
[truncated: 490 more rows]

## Sheet: T3
Upstream Regulator	Molecule Type	Predicted Activation State	Activation z-score	p-value of overlap	Target Molecules in Dataset	Mechanistic Network
COL18A1	other	Activated	2.571	4.41e-05	CCND1,EPHB2,FOS,ID1,ID3,JUN,KDR	130 (21)
RB1	transcription regulator	Activated	2.515	2.74e-06	ACTC1,ATP1B1,CCND1,CD44,COL4A2,DUSP1,EGR1,FOS,FXYD1,GADD45GIP1,HES1,ID1,ID2,IFITM3,JUN,KDR,MYB,PMEPA1,PRSS23	143 (20)
miR-124-3p (and other miRNAs w/seed AAGGCAC)	mature microRNA	Activated	2.454	0.00221	CMTM6,CRYBG3,EGR1,GLI3,GRIA4,HES1,LIMCH1,MYO10,NEUROD1,NFIB,SOX8,SOX9,TF,VIM,ZFP36L2
CDK19	kinase	Activated	2.449	0.00032	CLU,FBXW7,HMGCS1,JUN,NOTCH1,SAT1,ZFP36L1
CTBP1	enzyme	Activated	2.415	1.76e-05	CCNG2,DKK1,FOS,SPRY2,TFF1,VCAN	8 (2)
IRF4	transcription regulator	Activated	2.377	0.0206	CXCR4,DBI,PRDM1,RORA,SPP1,ZFP36L1
MEN1	transcription regulator	Activated	2.375	3.66e-05	CCND1,FOS,GAS1,IGFBP2,PTPRZ1,VIM	108 (22)
miR-7108-3p (miRNAs w/seed CCCGCCC)	mature microRNA	Activated	2.236	0.209	CCN1,EPHB2,HES4,MSI2,SOX8
GTF2IRD1	transcription regulator	Activated	2.236	6.11e-05	CRX,FOS,KDR,NRL,PDE6H	61 (5)
EBI3	cytokine	Activated	2.236	0.000364	FOS,GADD45G,HLA-A,HLA-B,HLA-C	103 (13)
DGCR8	enzyme	Activated	2.234	5.99e-12	CCND1,CRABP1,EGR1,FOS,HES1,ID2,ID4,NOTCH1,PLP1,SOX2,TCF4	121 (16)
VHL	transcription regulator	Activated	2.2	0.00101	CCND1,CXCR4,IFITM3,SLC1A3,SPARC,VIM,ZFP36L1	123 (24)
NLRP12	other	Activated	2.186	4.15e-05	CXCR4,HLA-A,HLA-B,HLA-C,JUN	124 (13)
SCD	enzyme	Activated	2.043	0.000189	CD44,EGR1,FABP5,FOS,HMGCS1,IGFBP2,JUN,SPP1,SQLE	130 (20)
ACOX1	enzyme	Activated	2	0.0678	COL4A2,GSTP1,IGFBP2,TAGLN2
miR-3081-3p (miRNAs w/seed UGCGCUC)	mature microRNA	Activated	2	0.00896	CCN1,GRIA4,JUND,VIM
miR-181a-2-3p (and other miRNAs w/seed CCACUGA)	mature microRNA	Activated	2	0.262	MOB3B,PLEKHA1,RASSF4,SPP1
miR-140-3p (and other miRNAs w/seed ACCACAG)	mature microRNA	Activated	2	0.306	MOB3B,MYB,PLEKHA1,WIF1
miR-532-5p (and other miRNAs w/seed AUGCCUU)	mature microRNA	Activated	2	0.116	DDHD1,PRSS23,PRSS35,RLBP1
mir-802	microRNA	Activated	2	0.0719	CXCR4,SPP1,TCF4,VIM
miR-3071-3p (miRNAs w/seed UCAUCAA)	mature microRNA	Activated	2	0.0176	BCHE,JUN,SAT1,VCAN
miR-673-5p (and other miRNAs w/seed UCACAGC)	mature microRNA	Activated	2	0.114	DBI,FBXW7,ID4,MGARP
miR-1204 (miRNAs w/seed CGUGGCC)	mature microRNA	Activated	2	0.0733	DENND2B,EPHB2,GAS1,RAX
ZNF106	other	Activated	2	0.00128	ACTC1,GADD45GIP1,IFITM3,RTN4
miR-5008-5p (miRNAs w/seed GAGGCCC)	mature microRNA	Activated	2	0.481	DENND11,FOS,SOX8,TAGLN2
miR-6079 (miRNAs w/seed UGGAAGC)	mature microRNA	Activated	2	0.0394	ASCL1,CMTM6,PLEKHA1,RTN4
miR-7683-5p (miRNAs w/seed UCCGUGU)	mature microRNA	Activated	2	0.0202	FEZF2,GRIA4,MLEC,TLE4
PHF21A	other		1.996	2.41e-06	CHGB,SNAP25,SYP,SYT1
SNCA	enzyme		1.994	0.000163	CD44,CHGB,CRYM,CXCR4,DIPK1C,DUSP1,FABP7,HES1,HES5,HPCA,NOTCH1,SLC17A7,SORCS1,SYP	101 (12)
HTATIP2	transcription regulator		1.982	3.61e-06	CCND1,FOS,SOX2,SPARC,SPP1	119 (22)
MIR124	group		1.982	0.000489	GRIA4,NES,REST,VIM
miR-508-3p (miRNAs w/seed GAUUGUA)	mature microRNA		1.982	0.00611	DNAJB1,GRIA4,RASSF4,VIM
miR-183-5p (miRNAs w/seed AUGGCAC)	mature microRNA		1.982	0.309	DBI,QDPR,SPRY2,TCF4
NOG	growth factor		1.982	0.000284	ID3,ID4,KDR,SPP1,VCAN	94 (17)
FBXW7	enzyme		1.98	0.0136	HEY1,JUN,NOTCH1,SQLE
FAS	transmembrane receptor		1.98	0.000747	CAMK2B,CD44,COL4A2,EGR1,FOS,GADD45G,GNAI2,JUN,JUND,LUM,SPP1,TAGLN2	120 (22)
SSTR2	G-protein coupled receptor		1.969	3.47e-06	CCN1,FOS,HEY1,JUN,PMEPA1,PYGL,SAT1,SOX9,VIM	98 (10)
mir-21	microRNA		1.964	0.085	CD44,CLU,NES,RTN4,SOX2,SPRY2,STMN1
SETD2	enzyme		1.964	0.00128	CCN1,CCND1,JUN,RTN4
mir-34	microRNA		1.958	0.0245	CCND1,HEY1,MYB,NOTCH1
TGFB2-AS1	other		1.951	0.00937	FOS,LUM,PMEPA1,SOX2	69 (7)
mir-23	microRNA		1.948	0.00128	CCND1,HMGA1,SPP1,SPRY2	117 (16)
IKZF1	transcription regulator		1.944	0.0277	DKK1,HES1,NOTCH1,PYGL,RASSF4,SOX9,YPEL2
KLF2	transcription regulator		1.942	3.3e-05	CD44,CXCR4,ID1,ID3,KDR,NDRG1,NOTCH1,PRDM1,SOX9,TCF4	89 (10)
EOMES	transcription regulator		1.937	3.07e-05	ACTC1,CRABP1,CRYM,CXCR4,KDR,PRDM1,SOX2,TCF4
miR-5624-3p (and other miRNAs w/seed UAAGGCA)	mature microRNA		1.937	0.159	CNN3,FABP5,GAS1,MYO10,NFIB,QDPR,SOX9
THRB	ligand-dependent nuclear receptor		1.933	4.61e-06	ATP1A3,CCND1,CXCR4,DKK1,FOS,H1-2,ID1,IGFBP2,JUN,PCP2,SFRP2,SPP1,TRH,WIF1	114 (23)
miR-155-5p (miRNAs w/seed UAAUGCU)	mature microRNA		1.927	3e-05	CCN1,CCND1,CSRP2,DNAJB1,FOS,H3-3A/H3-3B,MSI2,MYB,MYO10,PIK3R1,TCF4,TLE4,VIM
miR-3082-3p (and other miRNAs w/seed ACAUGGC)	mature microRNA		1.89	0.0111	ADAMTS6,ATP1B1,CCND1,DBI,FEZF2,GAS1,TF
miR-450a-5p (and other miRNAs w/seed UUUGCGA)	mature microRNA		1.89	0.000134	FBXW7,MEIS2,NOTCH1,SOX2,SPP1,TCF4,VIM
ASCL1	transcription regulator		1.851	2.74e-11	CCNG2,DLL3,GADD45G,HES5,ID1,ID3,INSM1,MFNG,NES,NEUROD1,SNAP25,SOX2,SOX9
APOE	transporter		1.842	1.37e-07	CALR,CCN1,CCND1,CD44,CLU,DBI,EGR1,FABP5,FOS,HSPA1A/HSPA1B,JUN,PMEPA1,PTP4A3,RXRG,SOX9,SPP1,SYP,VCAN	116 (21)
IL27	cytokine		1.832	3.03e-05	EGR1,FOS,GADD45G,HLA-A,HLA-B,HLA-C,ID2,PRDM1,VIM	128 (20)
ID2	transcription regulator		1.824	3.78e-11	CCND1,CCNG2,CD44,CXCR4,DUSP1,EEF1D,GADD45G,HES5,ID3,MCAM,MYB,NOTCH1,PIK3R1,RORA,SOX4,SOX9,TCF4,TF	97 (16)
PROX1	transcription regulator		1.777	4.95e-06	CHGB,CPE,HEY1,KDR,SCG3,SYP
JUNB	transcription regulator		1.732	0.000283	CCND1,CD44,CLU,DUSP1,HES1,ID2,SPTAN1,SYT1	98 (8)
PSMB11	peptidase		1.673	0.00197	CCND1,CREB5,GNB3,HSPA1A/HSPA1B,RARRES2,VCAN
FOXO4	transcription regulator		1.664	0.00146	CCND1,CCNG2,COL4A2,FABP5,HMGCS1,SOX9	126 (12)
BTNL2	transmembrane receptor		1.633	0.000153	CNN3,DAPL1,IFITM3,MYO10,PLXDC1,YPEL2
miR-5189-3p (and other miRNAs w/seed GCCAACC)	mature microRNA		1.633	0.0338	CRABP1,HES5,MFNG,MLEC,RNF180,STON2
miR-6770-3p (miRNAs w/seed UGGCGGC)	mature microRNA		1.633	0.0056	ELP4,FXYD1,HES5,HMGA1,PTPRZ1,RAX
KDM5B	transcription regulator		1.6	4.85e-07	CCND1,EGR1,FABP5,ID2,IGFBP2,LIMCH1,MCAM,MYB,SAT1,SOX4,SOX9	108 (15)
let-7	microRNA		1.587	0.00431	CCND1,CD44,HMGA1,ID2,NR2E1,SOX2,SOX9,VIM	127 (17)
APC	enzyme		1.567	6.46e-09	CCND1,CD44,CHGB,CLU,GLI3,HES1,HEY1,ID1,ID2,ID3,JUN,NOTCH1,SOX9,SPP1	130 (18)
SPI1	transcription regulator		1.546	0.000424	CCND1,FOS,HES1,ID2,ID3,IFITM3,JUN,MYB,PRDM1,SPP1,VIM	146 (21)
PAX6	transcription regulator		1.534	8.7e-05	ASCL1,CCND1,DKK3,FABP7,HES1,NEUROG1,OTX2,SOX2,TMX1,TRPM3	18 (2)
IFNB1	cytokine		1.517	0.0015	DKK3,FOS,GAS1,HLA-A,HMGCS1,NOTCH1,PRDM1,SPP1,SPRY2,SQLE	132 (22)
FOS	transcription regulator		1.488	8.43e-10	CCND1,CD44,CLU,COL16A1,CRABP1,EGR1,FOS,FZD5,GAS1,GSTP1,HLA-B,IGDCC3,JUN,OCIAD2,PMEPA1,PRDM1,PTPRZ1,SFRP2,SPP1,STMN1,SYT1,TFF1,TPD52,TUBB,VIM,VSX1	149 (19)
miR-541-5p (and other miRNAs w/seed AAGGAUU)	mature microRNA		1.474	0.0161	CCDC34,CCND1,LUM,RNLS,VIM
SOX17	transcription regulator		1.455	1.63e-06	CCND1,COL4A2,FOS,KDR,SOX2,SPARC	121 (12)
MECP2	transcription regulator		1.446	4.31e-05	BSG,CAMK2B,EGR1,FXYD1,GSTP1,PLP1,REST,SLC17A7,SLC1A2,VIM	112 (13)
mir-29	microRNA		1.419	1.37e-06	CCND1,COL4A2,DKK1,HMGA1,PIK3R1,SFRP2,SPARC,VIM,ZFP36L1	90 (12)
PRKAA1	kinase		1.414	0.000725	CD24,CHGB,CLU,ID2,NFIB,PMEPA1,TTYH1,ZFP36L1
miR-1306-3p (miRNAs w/seed CGUUGGC)	mature microRNA		1.414	0.000309	ASCL1,GNAI2,H1-2,HLA-A,MCAM,NR2E1,STON2,ZFP36L2
PAX2	transcription regulator		1.387	2.34e-05	DKK3,PAX6,SFRP2,SOX8,SSTR2
G protein alpha	group		1.342	0.000515	CALR,DBI,FOS,FSTL5,SPCS1,UQCC2
SIX2	transcription regulator		1.342	0.000536	CAMK2B,CHGB,CPE,NEUROD1,PAX6
miR-5689 (miRNAs w/seed GCAUACA)	mature microRNA		1.342	0.0302	FABP5,HMGCS1,OTX2,PRSS35,SORCS1
CLOCK	transcription regulator		1.342	0.0204	CADM2,CCND1,FABP7,ID1,MEST,SLC1A2,TMX1
INSIG1	other		1.342	0.0065	CXCR4,FABP5,HMGCS1,JUN,SQLE	14 (3)
miR-6875-3p (miRNAs w/seed UUCUUCC)	mature microRNA		1.342	0.0251	DST,L1TD1,MEST,RASSF4,TMEM37
PAK2	kinase		1.342	4.74e-05	CKB,DUSP1,HMGA1,ID1,ID3	89 (7)
FOXO3	transcription regulator		1.328	7.51e-08	CCN1,CCND1,CCNG2,CD44,COL4A2,CXCR4,EGR1,FABP5,FOS,ID1,MCAM,NDRG1,PRDM1,RTN4,SOX2,SOX9,TFF1,VIM	141 (21)
DICER1	enzyme		1.292	1.17e-08	CCN1,CCND1,CD44,CRYM,CXCR4,EGR1,FOS,HES1,ID3,IGDCC3,JUN,KDR,MCAM,NOTCH1,SOX2,SPARC,SPRY2,VIM	134 (19)
miR-27a-3p (and other miRNAs w/seed UCACAGU)	mature microRNA		1.282	0.00875	CA10,CNN3,CRB1,CSRP2,FBXW7,GRIA4,ID3,JUN,NOTCH1,SNAP25,SPRY2
ZEB2	transcription regulator		1.273	0.000113	CCND1,HES5,ID2,ID4,MYB,VIM	112 (18)
RBL1	transcription regulator		1.246	0.00896	CCND1,FOS,HES1,NOTCH1	142 (20)
GFI1	transcription regulator		1.219	0.0227	CXCR4,GADD45G,ID2,JUN,NEUROD1
KLF4	transcription regulator		1.212	2.14e-08	ACTC1,ASCL1,CCND1,CD44,DUSP1,HES1,HEY1,ID3,IFITM3,KDR,MSI2,NOTCH1,OTX2,PRDM1,RYBP,SOX2,TF,VIM	142 (22)
mir-8	microRNA		1.208	6.05e-05	CCND1,CCNG2,GSE1,KDR,NOTCH1,SOX2,SOX9,SPRY2,VIM,YPEL2	137 (19)
SOCS1	other		1.206	0.018	CCND1,CD44,DUSP1,FOS,JUN
mir-15	microRNA		1.189	0.0131	CCND1,HSPA1A/HSPA1B,MYB,RORA
NEUROG3	transcription regulator		1.179	0.00557	LHX4,NEUROD1,NEUROG1,PAX6,SYP
CD38	enzyme		1.178	0.0021	ATP1B1,CD44,DENND11,GADD45G,NDRG1,PRDM1,VIM	98 (11)
Laminin (complex)	complex		1.172	8.71e-05	CCND1,CHGB,ETV5,ID2,VIM	130 (22)
RUNX3	transcription regulator		1.165	0.0131	CCN1,CCND1,SPP1,SSX2IP,VIM
DACH1	transcription regulator		1.154	7.76e-05	EGR1,FOS,ID1,JUN,SOX2	111 (20)
NR1H4	ligand-dependent nuclear receptor		1.147	0.0132	CCN1,CRABP1,FABP5,FABP7,NEUROD1,RARRES2,SPP1
PPARGC1A	transcription regulator		1.14	0.00119	COL2A1,CRX,FOS,LUM,NEUROD1,NRL,PDE6H,PIK3R1,RCVRN,RLBP1,SOX2,TCF4,VCAN	42 (5)
miR-542-5p (and other miRNAs w/seed UCGGGGA)	mature microRNA		1.134	0.000863	CCDC60,DKK1,GAS1,PTPRZ1,RASSF4,RLBP1,STMN1
STK11	kinase		1.134	0.0054	CCND1,CHGB,ID1,LUM,MCAM,PTPRZ1,SPP1,TFF1,TTYH1	121 (19)
AMBRA1	other		1.131	0.00151	CCND1,COL16A1,COL4A2,VIM	72 (7)
TLE3	other		1.121	0.00779	MYB,NFIB,SOX9,TAGLN2,TLE4
miR-717 (miRNAs w/seed UCAGACA)	mature microRNA		1.109	0.0407	HLA-A,PMEPA1,PRSS23,PTPRZ1,TCF4
TSC2	other		1.109	0.00224	ATP6V0B,CCND1,EGR1,FOS,IFITM3,METRN,RASSF4	122 (26)
CDX1	transcription regulator		1.103	0.00494	CCND1,CLU,NEUROD1,NEUROG1	107 (7)
mir-31	microRNA		1.1	0.000304	BAMBI,DKK1,SPP1,STMN1
mir-155	microRNA		1.076	0.0211	CCND1,DNAJB1,MYB,RORA,VIM
DUOXA1	other		1.067	2.41e-06	NEUROD1,NEUROD4,NEUROG1,VIM
SPRY1	other		1.067	0.00015	ETV5,FABP7,ID2,MEST
PDX1	transcription regulator		1.043	2.37e-08	CCND1,CD44,CHGB,CKB,CXCR4,EGR1,ID1,ID2,ID3,JUN,NEUROD1,PAX6,PRSS23,SPP1	121 (12)
Tcf7	transcription regulator		1.023	7.89e-05	ADAMTS6,CPE,HES1,ID2,ID3,IFITM3,ITSN1,MCAM,PRDM1,PYGL,SQLE,TCF4,YPEL2
DAB2IP	other		1.02	3.76e-06	CD44,CLU,EGR1,VIM	128 (22)
CDH1	other		1.015	4.1e-05	CCND1,CD44,JUN,MCAM,PIK3R1,SOX9,VIM	138 (22)
Hdac	group		1.01	1.72e-06	CCND1,CCNG2,CXCR4,DKK3,EGR1,FOS,JUN,SFRP2,SPP1,SPRY2,WIF1	133 (24)
TP63	transcription regulator		1.007	3.14e-12	CCN1,CCND1,COL4A2,CXCR4,DKK1,DKK3,DNAJB1,DST,EGR1,FOS,FZD5,HES1,HES5,HEY1,HSPA1A/HSPA1B,ID1,ID3,IGFBP2,INSM1,JUN,MYB,NOTCH1,PCBP4,RASSF4,SOX2,SOX4,SOX9,STMN1,STON2,VIM	132 (17)
SAV1	other		1	0.000109	CCND1,SOX4,SPP1,VIM	77 (7)
HYAL1	enzyme		1	0.0022	EPHB2,SOX9,SPP1,TUBB	44 (7)
miR-6509-5p (miRNAs w/seed UUAGGUA)	mature microRNA		1	0.0215	BAMBI,CADM2,DKK1,MYB
miR-3571 (and other miRNAs w/seed ACACACU)	mature microRNA		1	0.0319	DIPK1C,FAM161A,FOS,PMEPA1
miR-3112-3p (miRNAs w/seed AGUUUGU)	mature microRNA		1	0.0022	ASCL1,CREB5,MEST,SCG3
SFTPA1	transporter		1	0.00979	CCN1,EGR1,FOS,SFRP2	110 (22)
TIMP3	other		1	0.00205	BAMBI,FOS,JUN,VIM	115 (19)
GSTO1	enzyme		1	0.00494	COL16A1,SAT1,SOX4,ZFP36L1
SGK1	kinase		1	0.00522	HES5,SLC1A2,SLC1A3,SLC1A7
miR-6760-3p (miRNAs w/seed CACUGUC)	mature microRNA		1	0.0237	CCDC181,ELP4,QDPR,RLBP1
miR-585-5p (miRNAs w/seed UAGCACA)	mature microRNA		1	0.0457	FABP5,MEST,SPARC,TF
DUSP5	phosphatase		1	5.12e-05	EGR1,ID2,PRDM1,SSTR2
FKBP10	enzyme		1	0.00394	COL16A1,COL2A1,EPHB2,SPP1
IKZF3	transcription regulator		1	0.00676	DKK1,RASSF4,SOX9,YPEL2
ANXA7	ion channel		1	0.00611	EPHB2,GSTP1,NEUROD1,PAX6
Cdc42	enzyme		1	0.0131	CCN1,COL2A1,ETV5,STMN1
ADORA2A	G-protein coupled receptor		1	0.000118	ATP1A3,ATP2B1,CKB,DUSP1,FOS,HPCA,IFITM3,SPARC	153 (20)
miR-7a-5p (and other miRNAs w/seed GGAAGAC)	mature microRNA		0.98	0.0182	ACTC1,CNN3,CRX,DKK3,FOS,PAX6,SLC17A7,VIM
ZFP36	transcription regulator		0.975	0.00336	FOS,JUN,PRDM1,SPP1,TFF1	128 (20)
PTEN	phosphatase		0.958	3.86e-13	CADM3,CADPS,CAMK2B,CCND1,CD44,CNN3,COL16A1,COL4A2,CXCR4,DKK3,DUSP1,FOS,GPM6B,HMGCS1,HSPA1A/HSPA1B,ID4,IGFBP2,JUN,JUND,KDR,MCAM,NDRG1,PIK3R1,PRDM1,PYGL,SAT1,SLC17A7,SOX4,SOX8,SPARC,SPP1,SPRY2,SQLE,TMA16,VIM	143 (20)
IL5	cytokine		0.939	0.00108	ATP1B1,CD24,CXCR4,DENND11,EGR1,GADD45G,LUM,NDRG1,PRDM1,VIM	109 (18)
EGLN1	enzyme		0.927	0.00709	COL2A1,CXCR4,HES1,SOX9	46 (7)
OGT	enzyme		0.926	4.01e-06	CCND1,CPE,FOS,HMGA1,IGFBP2,JUN,LBH,VIM,WIF1	138 (20)
YY1	transcription regulator		0.91	3.5e-12	ACTC1,CALR,CLU,CRABP1,CXCR4,EGR1,FOS,GADD45G,H4C3,HES5,HEY1,ID2,ID3,ID4,KDR,PLP1,REST,SLC1A2,SLC1A3,TCF4,TPH1,VIM	132 (20)
TLR4	transmembrane receptor		0.905	0.0358	BAMBI,CCN1,CD44,FOS,GADD45G,IFITM3,PRDM1,SPP1,TCF4
METTL3	enzyme		0.9	0.0384	JUN,PTP4A3,VIM,ZNF385A
GLIS1	transcription regulator		0.832	0.000546	COL16A1,COL4A2,RTN4,SPARC
GRN	growth factor		0.82	3.3e-05	CCND1,CLU,COL2A1,EGR1,ETV5,FOS,HLA-B,PIK3R1,SPP1,SYP	143 (23)
ID3	transcription regulator		0.817	3.57e-09	CCNG2,CD44,CXCR4,DUSP1,GADD45G,HES5,ID3,MYB,NEUROD1,NOTCH1,PIK3R1,PRDM1,RORA,SOX4,TCF4	100 (13)
miR-3937 (miRNAs w/seed CAGGCGG)	mature microRNA		0.816	0.00898	COL4A2,DPYSL4,FABP7,ID4,RASSF4,RAX
miR-4279 (miRNAs w/seed UCUCCUC)	mature microRNA		0.816	0.0189	CMTM6,DST,FOS,RAX,SOX4,SQLE
miR-589-5p (and other miRNAs w/seed GAGAACC)	mature microRNA		0.816	0.0146	CALR,CMTM6,CRYM,EGR1,GNB3,SLC1A3
miR-4307 (miRNAs w/seed AUGUUUU)	mature microRNA		0.816	2.44e-05	CADM2,CCND1,LIMCH1,LUM,PYGL,SCG3
RHO	G-protein coupled receptor		0.816	8.23e-07	CD44,CRABP1,CRX,EPB41,FOS,H1-2,NRL,RCVRN
miR-7032-3p (and other miRNAs w/seed UCCUCUC)	mature microRNA		0.788	0.0272	FAM89A,ID4,IGDCC3,PAX6,PMEPA1,RARRES2,RLBP1,SYP
FOXA1	transcription regulator		0.767	0.000115	ACTC1,DCT,NES,PAX6,RORA,SOX9,TAGLN2,TF,TFF1	96 (12)
miR-2139 (miRNAs w/seed GCUGCGC)	mature microRNA		0.762	0.0252	ADAMTS6,CCN1,HEY1,HMGA1
PAX5	transcription regulator		0.762	0.00643	CCND1,PRDM1,PYGL,VIM
miR-92a-3p (and other miRNAs w/seed AUUGCAC)	mature microRNA		0.762	0.0124	ACTC1,CCND1,DKK3,FBXW7,NFIB,PLEKHA1,RNF180,SOX4
TSHZ3	transcription regulator		0.747	0.0027	CRYM,FEZF2,IGSF21,SLC1A2
PRKCA	kinase		0.739	1.35e-06	CCND1,EGR1,FOS,HES1,HEY1,HSPA1A/HSPA1B,ID1,ID2,ID3,JUN	122 (21)
mir-24	microRNA		0.721	2.71e-05	ID2,KDR,NEUROD1,PRDM1,RORA,SPRY2	119 (10)
Immunoglobulin	complex		0.712	2.57e-08	BSG,CALR,CCND1,CD44,CLU,COL4A2,CXCR4,DBI,DUSP1,EGR1,ETV5,FOS,GSTP1,HEY1,HLA-A,HLA-B,HMGA1,IFITM3,KDR,MYB,PIK3R1,PRDM1,SAMD11,SAT1,SFRP2,SOX2,SOX9,SPP1,SQLE,STMN1,TFF1,VCAN,ZFP36L2	134 (19)
NFE2L2	transcription regulator		0.71	7.3e-05	AGAP1,CHGB,COL4A2,DCT,EPB41,FXYD1,GADD45G,GNAI2,GSTP1,HMGCS1,HPCA,KDR,NEUROD1,PIK3R1,SAT1,SYP,SYT1
mir-1	microRNA		0.707	3.7e-05	CCND1,CNN3,EML4,H3-3A/H3-3B,SOX9,TAGLN2,TMX1,ZFP36L1
miR-4706 (and other miRNAs w/seed GCGGGGA)	mature microRNA		0.707	0.0369	CALR,CLU,GNAI2,HES4,RAX,SLC17A7,TLE4,ZNF385A
PRKG2	kinase		0.689	4.13e-07	FOS,NES,PLP1,SOX9	76 (8)
miR-21-5p (and other miRNAs w/seed AGCUUAU)	mature microRNA		0.679	0.00369	KDR,LUM,NFIB,PIK3R1,PLEKHA1,RTN4,SPRY2
BCR (complex)	complex		0.678	0.00587	ATP6V0B,CALR,CCND1,CCNG2,CD44,CXCR4,EGR1,FOS,PRDM1	116 (19)
INSR	kinase		0.655	9.47e-07	ATP1B1,ATP2B1,CCND1,CCNG2,CXCR4,DUSP1,EGR1,FOS,GAS1,HMGCS1,NDRG1,NES,OTX2,PAX6,PRDM1,REST,SAT1,SEZ6L2,SFRP2,SOX2,SQLE	134 (22)
miR-34a-5p (and other miRNAs w/seed GGCAGUG)	mature microRNA		0.653	0.0197	CCND1,CRABP1,DPYSL4,GAS1,HSPA1A/HSPA1B,KCNK3,LGR4,MYB,NDRG1,NOTCH1,RCVRN,SLC38A5,SOX2,SYT1,TMEM37,TPD52
FOSL1	transcription regulator		0.652	5.69e-07	CCN1,CCND1,CD44,EGR1,FOS,JUN,PRDM1,SPARC,TF	114 (16)
SPDEF	transcription regulator		0.64	0.00119	COL16A1,COL4A2,DKK3,STMN1,VIM
miR-29b-3p (and other miRNAs w/seed AGCACCA)	mature microRNA		0.637	0.000141	CCND1,COL2A1,COL4A2,HMGN3,ID1,ID2,MLLT11,PIK3R1,PLP1,PTP4A3,SPARC,TLCD3B,VCAN,YPEL2,ZFP36L1
miR-455-3p (miRNAs w/seed CAGUCCA)	mature microRNA		0.626	0.0245	CCND1,CRYBG3,NFIB,PAX6,RTN4
CREM	transcription regulator		0.617	0.000309	ACTC1,CCND1,DUSP1,EGR1,FOS,HMGCS1,MEST,NOTCH1	124 (19)
ERBB3	kinase		0.59	3.93e-08	CCN1,CCND1,CCNG2,CLU,CXCR4,DUSP1,EGR1,ETV5,NDRG1,SPARC,STMN1	124 (22)
miR-3941 (and other miRNAs w/seed UACACAC)	mature microRNA		0.588	0.0114	DIPK1C,DKK1,DNAJB1,H3-3A/H3-3B,HMGN3,LBH,MCAM,PRSS23,RORA,SLC1A2
TCF4	transcription regulator		0.579	0.0389	ASCL1,DCT,HES1,ID2,ID3,NOTCH1,PRDM1,SOX9
STAT4	transcription regulator		0.578	3.43e-05	BSG,ETV5,GADD45G,H3-3A/H3-3B,MGARP,NDRG1,PRDM1,PYGL,RORA,SAT1,TPD52
estrogen receptor	group		0.569	6.69e-07	CCND1,CD24,CD44,COL4A2,CXCR4,EGR1,FOS,HSPA1A/HSPA1B,JUN,SAT1,SPARC,SYP,TFF1,VIM	131 (22)
Interferon alpha	group		0.557	0.00936	BCHE,CCND1,FOS,HLA-A,HLA-B,HLA-C,HSPA1A/HSPA1B,IFITM3,SAT1,SPRY2,TUBB,VCAN,VIM	149 (20)
DDX25	enzyme		0.555	0.00779	ATP1B2,EEF1D,FABP5,FXYD1,TLE3
PRKAA2	kinase		0.555	0.00389	CHGB,EGR1,NFIB,TTYH1,VIM,ZFP36L1
NEUROD1	transcription regulator		0.555	4.03e-05	INSM1,JUND,NEUROD1,PAX6,RCVRN,SYP
miR-342-3p (miRNAs w/seed CUCACAC)	mature microRNA		0.555	0.036	DIPK1C,DKK1,ID4,OCIAD2,TMX1
miR-17-5p (and other miRNAs w/seed AAAGUGC)	mature microRNA		0.551	0.000569	BAMBI,CCN1,CCND1,CCNG2,CD44,CRYBG3,DDHD1,SLC17A7,SLC1A3,VIM,VSX1	105 (7)
PPARG	ligand-dependent nuclear receptor		0.55	0.000451	CCND1,FABP5,HES1,JUN,NDRG1,PRDM1,PYGL,RARRES2,SAT1,SPP1,TBCC,TCF4,TLCD3B,TUBB,VIM	131 (23)
CYP19A1	enzyme		0.549	1.82e-05	CCND1,CD44,HLA-A,JUN,SLC1A2,SOX9,SSTR2,SYP	109 (20)
IL21	cytokine		0.52	0.0399	BSG,EGR1,ID2,PRDM1,RORA
SPRY2	other		0.517	2.66e-07	CXCR4,ETV5,FABP7,FOS,ID2,MAP7,MEST,PRDM1,SPP1,TPH1	111 (12)
miR-223-3p (miRNAs w/seed GUCAGUU)	mature microRNA		0.513	0.00123	CCND1,FAM89A,FBXW7,GPM6B,HLA-A,HMGCS1,OLFM1,STMN1,VIM
mir-223	microRNA		0.503	0.0216	CCND1,FBXW7,HMGCS1,ID2,STMN1
PML	transcription regulator		0.494	0.000411	CCND1,CPE,CXCR4,HMGCS1,ID2,NDRG1,STMN1,VIM	132 (21)
CCN5	growth factor		0.478	1.36e-06	CCND1,CD24,CD44,JUN,SPARC,TFF1,VIM	128 (21)
RNF187	enzyme		0.447	0.000217	ASCL1,CCND1,ID1,JUN,PCBP4,ZFP36L1	92 (7)
miR-3686 (and other miRNAs w/seed UCUGUAA)	mature microRNA		0.447	0.0441	ELP4,KLHL35,RORA,SPRY2,VIM
miR-3177-5p (miRNAs w/seed GUGUACA)	mature microRNA		0.447	0.0127	BAMBI,CADM2,DKK1,OCIAD2,SAT1
miR-3089-5p (miRNAs w/seed GAGUUCA)	mature microRNA		0.447	0.0302	DKK1,HLA-A,ID3,MGARP,TMA16
miR-4730 (miRNAs w/seed UGGCGGA)	mature microRNA		0.447	0.007	ELP4,FXYD1,HMGA1,MDGA1,RAX
SS18	transcription regulator		0.447	2.29e-06	C11orf96,CAMK2B,HES4,SOX2,SOX8,TLE3
RGS4	enzyme		0.447	0.00368	ID4,KDR,PAX6,PYGL,SPP1
miR-6508-5p (and other miRNAs w/seed CUAGAAA)	mature microRNA		0.447	0.00142	CRYM,HMGN3,MGARP,PEX5L,RORA
GRIN3A	ion channel		0.447	0.00726	CADM2,KLHDC8A,LUM,TRPM3,WIF1
miR-7689-3p (miRNAs w/seed UAGAGCC)	mature microRNA		0.447	0.0131	HEY1,LGR4,LHX4,PLP1,SNAP25
miR-4433b-3p (miRNAs w/seed AGGAGUG)	mature microRNA		0.447	0.00674	MLLT11,SFRP2,SPRY2,TBCC,VIM
miR-6832-3p (miRNAs w/seed CCCUUUU)	mature microRNA		0.447	0.0106	EGR1,GRIA4,NFIB,SOX4,TTYH1
miR-8101 (miRNAs w/seed GCGAGCG)	mature microRNA		0.447	0.000164	FZD5,ID1,NUDT3,RORA,ZFP36L1
miR-7007-3p (miRNAs w/seed CCAUCCA)	mature microRNA		0.447	0.045	HLA-A,METRN,PAG1,TLE4,WIF1
DSCAML1	other		0.447	0.00266	ETV5,GADD45G,ID3,LHX4,SRGAP3
VIP	other		0.436	0.00016	CCND1,CHGB,FOS,SLC1A2,SLC1A3,TRH,VIM	140 (19)
LEF1	transcription regulator		0.432	5.57e-09	ADAMTS6,CCND1,CD44,CPE,CXCR4,DCT,DKK1,HES1,ID2,IFITM3,ITSN1,PRDM1,PYGL,SOX9,SPP1,TCF4,VIM,YPEL2	149 (24)
EPO	cytokine		0.426	5.86e-09	CCNG2,CXCR4,EGR1,FABP5,FOS,ID1,ID2,JUN,KCNV2,MYB,NFIB,PAX6,SLC1A2,SPP1,SPTAN1,SYP,TF,TPH1	125 (23)
BCL2	transporter		0.409	2.24e-08	CCND1,CHGB,COL2A1,FOS,MCAM,NDRG1,NES,PRDM1,SCG3,SNAP25,SOX9	127 (25)
PELP1	other		0.391	0.000762	CCND1,CCNG2,FOS,L1TD1,NDRG1,SLC1A3,TFF1	135 (24)
INHBA	growth factor		0.389	2.09e-05	BAMBI,CCND1,CD24,CXCR4,MPPED2,PRDM1,SLC1A2,SLC38A5,SOX2,SOX4,VIM	102 (11)
GSK3B	kinase		0.388	0.000515	CCND1,FOS,KDR,MYB,NEUROD1,RORA,SPP1	119 (23)
miR-1893 (and other miRNAs w/seed GCGCGGG)	mature microRNA		0.378	0.00562	C11orf96,JUN,JUND,MYO10,NRL,RAX,TULP1
miR-877-3p (miRNAs w/seed CCUCUUC)	mature microRNA		0.378	0.00841	CRX,DST,HES1,PMEPA1,RASSF4,SLC38A5,SQLE
let-7g-3p (miRNAs w/seed CUGUACA)	mature microRNA		0.378	0.00203	ATP1B1,CCNG2,CXCR4,HMGCS1,NEUROD1,SOX2,SOX8
miR-3667-3p (miRNAs w/seed CCUUCCU)	mature microRNA		0.378	0.0153	FAM89A,FXYD1,GADD45G,IGFBP2,KDR,NDRG1,QDPR
miR-4652-5p (miRNAs w/seed GGGGACU)	mature microRNA		0.378	0.0249	CRYM,DENND2B,HMGA1,NRL,RASSF4,RAX,RCVRN
NKX2-3	transcription regulator		0.378	0.00925	BCHE,HEY1,HLA-B,HLA-C,MFNG,SOX2,YPEL2
ITGB1	transmembrane receptor		0.372	0.00802	FOS,GAS1,HLA-A,JUN,RBP3,VIM	96 (21)
KL	enzyme		0.372	0.00442	CCND1,EGR1,KDR,VIM	131 (22)
NCOA1	transcription regulator		0.336	0.00123	CCND1,CD24,EGR1,FOS,KDR,NFIB,TFF1	130 (23)
SYK	kinase		0.335	0.000235	BTBD8,CCND1,CD44,CXCR4,NOTCH1,RASSF4,YPEL2	125 (19)
miR-30c-5p (and other miRNAs w/seed GUAAACA)	mature microRNA		0.319	1.93e-07	ACTC1,CCND1,COL4A2,GNAI2,HES1,HEY1,JUN,MLLT11,MYO10,NEUROD1,NFIB,NOTCH1,PRDM1,RORA,SLC1A2,SPARC,VCAN,VIM,YPEL2	98 (7)
miR-3648 (miRNAs w/seed GCCGCGG)	mature microRNA		0.314	0.00608	AGAP1,CCND1,CD44,JUN,JUND,NDRG1,TCF4
FMR1	translation regulator		0.312	0.000814	AGAP1,SLC17A7,SLC1A2,SNAP25,SRRM4,SYP,SYT1,TAGLN2,TF
GLI1	transcription regulator		0.302	4.01e-15	C11orf96,CADPS,CCN1,CCND1,CCNG2,CD24,CD44,CLU,COL2A1,DKK1,EGR1,ETV5,FOS,H4C3,HES1,ID1,ID2,ID3,MEST,MSI2,NES,PLXDC1,SAT1,SLC1A3,SOX2,SOX4,SOX9,SPP1,STX3,TFF1,VIM,WIF1	153 (21)
CX3CR1	G-protein coupled receptor		0.302	3.38e-06	EGR1,FAM161A,FOS,GLI3,H3-3A/H3-3B,MAP7,NEUROD1,PLEKHA1,STX3,TF,YPEL2
ADRB	group		0.277	0.018	CCND1,FOS,HMGCS1,JUN,LBH
miR-221-3p (and other miRNAs w/seed GCUACAU)	mature microRNA		0.27	0.00507	C6orf118,FOS,GNB3,HMGCS1,KDR,NES,PIK3R1,PTPRZ1,ZNF385A
HDAC1	transcription regulator		0.263	2.98e-09	BAMBI,CCND1,CD44,COL2A1,DENND2B,DUSP1,EGR1,FOS,GSTP1,HES1,ID1,KDR,REST,SLC1A2,SOX2,SOX9,SPP1,TPD52	137 (20)
IL18	cytokine		0.254	0.00562	BSG,CD44,GADD45G,JUN,SLC17A7,SPP1,TF	125 (23)
ZBTB16	transcription regulator		0.246	0.00249	CCND1,CD44,FABP7,ID2,ID3,PIK3R1,RORA,SPP1	89 (7)
CDCP1	other		0.246	2.41e-06	CCND1,CD44,DKK1,VIM	124 (20)
SHC1	other		0.243	0.00105	DAPL1,DKK1,EGR1,FOS,GSTP1	107 (25)
MAPT	other		0.243	1e-10	ATP1A3,ATP1B1,BSG,CCND1,CD44,CKB,CRYM,DBI,FOS,GPM6B,GSTP1,HLA-A,HPCA,HSPA1A/HSPA1B,IFITM3,IGFBP2,JUN,QDPR,RARRES2,SLC1A2,SLC1A3,SNAP25,SPTAN1,SRGAP3,STMN1,SYP,TUBB,VIM	136 (19)
BDNF	growth factor		0.22	4.12e-09	ATP1A3,CCN1,CXCR4,DUSP1,EEF1D,EGR1,FOS,JUN,PLP1,SFRP2,SLC17A7,SNAP25,SPARC,SPP1,SPRY2,SYP,TPH1,TRH,VIM	147 (23)
miR-669c-3p (and other miRNAs w/seed ACACACA)	mature microRNA		0.204	0.000986	CADM2,CADM3,CCNG2,CREB5,DIPK1C,DNAJB1,FZD5,H4C3,JUND,LBH,MCAM,MDGA1,OCIAD2,PLEKHA1,PRSS23,RORA,SAT1,SLC1A2,SYT1,TCF4,TRPM3
SMARCA5	transcription regulator		0.2	0.012	CD44,EPHB2,HES1,HLA-A,NOTCH1
DDX5	enzyme		0.187	0.0016	CCND1,COL2A1,CXCR4,DUSP1,FOS,JUN	115 (17)
MSX2	transcription regulator		0.169	0.000987	CCND1,DKK1,SPP1,VIM	129 (19)
PRDM1	transcription regulator		0.157	0.000348	CD44,CXCR4,FOS,HLA-A,HLA-B,ID2,ID3,LHX4,PRDM1,SOX8,VSX1	128 (16)
IFN Beta	group		0.152	0.0491	DUSP1,HLA-A,HLA-B,RTN4,SPP1,SPRY2
NPC1	transporter		0.152	0.000973	CCND1,EGR1,FABP5,HLA-A,HMGCS1,PLP1,SYP	97 (16)
ADAM17	peptidase		0.152	2.17e-06	CCND1,GADD45G,HES1,HMGA1,NOTCH1,RTN4,SOX2,SOX9,SPP1,TF	136 (19)
MYBL2	transcription regulator		0.152	0.00253	CCND1,CCNG2,CLU,ID1
ATF4	transcription regulator		0.152	0.0233	CALR,COL4A2,IGFBP2,JUN,NDRG1,TRPM3
miR-291a-3p (and other miRNAs w/seed AAGUGCU)	mature microRNA		0.145	0.0109	ATP6V0B,CCND1,CD24,CD44,DDHD1,DKK1,NFIB,VIM
miR-200b-3p (and other miRNAs w/seed AAUACUG)	mature microRNA		0.14	0.0153	CNN3,GSE1,NOTCH1,SNAP25,VIM,YPEL2
miR-16-5p (and other miRNAs w/seed AGCAGCA)	mature microRNA		0.132	0.00311	CCND1,FBXW7,GADD45G,H3-3A/H3-3B,HMGA1,HSPA1A/HSPA1B,JUN,LHX4,MAP7,MLLT11,MOB3B,MYB,RTN4,RYBP,SLC38A5,TLCD3B,TLE4
SFRP1	transmembrane receptor		0.128	2.44e-05	CCND1,CD24,DKK1,SOX9,TTYH1,VIM	94 (10)
HDAC2	transcription regulator		0.128	0.00035	CCND1,CCNG2,COL2A1,DKK1,EGR1,SOX9,TFF1,TPD52	137 (22)
TP73	transcription regulator		0.126	0.000339	CCN1,CCNG2,CNN3,EGR1,HES1,HSPA1A/HSPA1B,ID2,LBH,NDRG1,NOTCH1,PTP4A3,RTN4,SAT1,SPP1,STMN1	122 (18)
SPARC	other		0.125	5.91e-05	HES1,NDRG1,NES,NOTCH1,PAG1,SOX9,SPARC,VIM	128 (19)
ARID1A	transcription regulator		0.114	1.72e-05	CD24,CKB,EPHB2,FZD5,HES1,MEST,OCIAD2,SOX2,SOX9,TFF1,VIM,WIF1	99 (13)
CDKN2A	transcription regulator		0.113	0.00055	CCND1,DUSP1,EGR1,FOS,GADD45G,ID1,JUN,PMEPA1,RORA,SOX2,VIM,ZNF385A	124 (24)
GATA6	transcription regulator		0.104	0.00192	ACTC1,ASCL1,COL4A2,HES1,OTX2,PRDM1,SOX2,SPARC
CREBBP	transcription regulator		0.103	8.84e-11	CAMK2B,CCN1,CCND1,CD44,CKB,CNN3,COL2A1,CXCR4,DUSP1,EGR1,FOS,HLA-B,HMGCS1,JUN,JUND,NDRG1,NEUROD1,NOTCH1,PLEKHA1,SLC1A2,TFF1,YPEL2,ZFP36L2	132 (20)
SOX11	transcription regulator		0.099	2.99e-06	CCND1,CD24,CXCR4,EGR1,MSI2,NLK,PAG1,PRDM1,RBP3,TFDP2
SMAD4	transcription regulator		0.084	0.000424	CCND1,CCNG2,COL2A1,FOS,ID1,ID2,PAX6,SOX2,SSTR2,UNC119,VIM	109 (16)
NDRG1	kinase		0.075	0.00105	CCND1,DKK1,FOS,JUN,VIM	136 (24)
KDM2B	enzyme		0.068	0.000673	CD24,COL2A1,FOS,SFRP2
miR-338-3p (miRNAs w/seed CCAGCAU)	mature microRNA		0.044	0.0182	CCDC181,CCND1,COL4A2,NEUROD1,SOX4,SPARC,VCAN,VIM
EGR1	transcription regulator		0.037	1.7e-07	CCND1,CD44,CHGB,CLU,COL2A1,EGR1,ID1,JUN,JUND,MYB,NDRG1,SPP1,SQLE	140 (17)
CBX7	other		0.025	0.000233	CCND1,CD44,PRDM1,SOX2
SPP1	cytokine		0.014	1.35e-05	CCND1,CD44,FOS,JUN,NOTCH1,PIK3R1,RXRG,SOX8,SOX9,SPP1,VIM	127 (18)
MYC	transcription regulator		0.014	2.37e-15	ASCL1,ATP6V0B,CCND1,CCNG2,CD44,CLU,COL2A1,COL4A2,CSRP2,CXCR4,DBI,DKK1,DUSP1,EGR1,FABP5,FOS,FXYD1,GADD45G,GAS1,H3-3A/H3-3B,HES1,HLA-A,HLA-B,HMGA1,ID1,ID2,ID3,JUN,KDR,LUM,MYO10,NDRG1,OTX2,PLP1,PMEPA1,PRDM1,PTP4A3,SAT1,SOX2,SOX9,SPARC,SPP1,STMN1,TAGLN2,TF,TFF1,TLE4,TPD52,UNC119,VIM,ZFP36L1	129 (20)
NUMB	other		0	0.000175	HES1,HEY1,NOTCH1,VIM	87 (14)
EPCAM	other		0	4.31e-07	CCND1,EGR1,FABP5,FOS,ID1,JUN,SOX2	118 (18)
TLX3	transcription regulator		0	4.13e-05	ASCL1,GRIA4,NEUROD1,NEUROG1
NSUN6	enzyme		0	0.000743	CCN1,ETV5,NDRG1,STMN1
SALL4	transcription regulator		0	3.54e-07	ATP1B1,CCN1,CCND1,CD44,DCT,ID2,ID3,JUN,NOTCH1,PTPRZ1,SOX2,VIM	38 (3)
EGLN	group		0	0.00757	ASCL1,CSRP2,DPYSL4,HLA-B,PYGL,SOX9
STAR	transporter		0	0.00468	ATP1A3,IFITM3,PIK3R1,SPP1
ALDH1A2	enzyme		0	0.000344	CCN1,CD44,SPARC,SPP1	110 (7)
HMOX1	enzyme		0	0.00261	CCND1,FOS,ID1,ID3,KDR,SPARC	144 (21)
TFAP4	transcription regulator		0	1.24e-05	CCNG2,CD44,EGR1,FOS,ID1,VIM	92 (7)
TERT	enzyme		0	0.000298	CCND1,CD24,HLA-B,IFITM3,NEUROD1,PAX6,PRSS23,SPP1,VIM	96 (12)
miR-3960 (and other miRNAs w/seed GCGGCGG)	mature microRNA		0	0.0201	AGAP1,FXYD1,GNAI2,GNB3,RAX,SPCS1
miR-4520-3p (miRNAs w/seed UGGACAG)	mature microRNA		0	0.0425	ASCL1,ATP1B1,CADM3,MLEC
miR-221-5p (and other miRNAs w/seed CCUGGCA)	mature microRNA		0	0.0445	ATP1B1,CCND1,COL4A2,CRX,MLEC,NOTCH1,PCBP4,SLC1A7,SORCS1,SPARC
miR-4529-5p (miRNAs w/seed GGCCAUC)	mature microRNA		0	0.00779	CRYBG3,EGR1,H3-3A/H3-3B,MYB,RASSF4,RCVRN
miR-4660 (miRNAs w/seed GCAGCUC)	mature microRNA		0	0.0363	AIPL1,CLU,HLA-B,HLA-C,LIMCH1,PMEPA1
miR-598-3p (miRNAs w/seed ACGUCAU)	mature microRNA		0	0.00643	ID2,KCNV2,PTPRZ1,VSX1
miR-634 (miRNAs w/seed ACCAGCA)	mature microRNA		0	0.00736	CADM2,CADM3,DENND2B,GNAI2,PLEKHA1,RCVRN
miR-3183 (and other miRNAs w/seed CCUCUCU)	mature microRNA		0	0.0491	FOS,ID4,RCVRN,RLBP1,SYP,TAGLN3
miR-3590-3p (and other miRNAs w/seed AGCACAA)	mature microRNA		0	0.0284	ACTC1,COL16A1,SPRY2,VIM
miR-1236-3p (miRNAs w/seed CUCUUCC)	mature microRNA		0	0.0363	CRX,CSRP2,DST,GPM6B,IGFBP2,JUND
miR-4793-5p (miRNAs w/seed CAUCCUG)	mature microRNA		0	0.0131	ACTC1,NR2E1,RAX,STX3
miR-4300 (and other miRNAs w/seed GGGAGCU)	mature microRNA		0	0.0315	GNAI2,HMGA1,KCNK3,MCAM,NRL,PLP1,RAX,SLC17A7
miR-1256 (miRNAs w/seed GGCAUUG)	mature microRNA		0	0.0301	DBI,H3-3A/H3-3B,NR2E1,VSX1
miR-1946a (miRNAs w/seed GCCGGGC)	mature microRNA		0	0.0384	IGSF21,RAX,SOX8,SSTR2
miR-711 (miRNAs w/seed GGACCCA)	mature microRNA		0	0.0111	CD44,NRL,RASSF4,TTYH1
miR-704 (miRNAs w/seed GACAUGU)	mature microRNA		0	0.0301	ETV5,FAM161A,LUM,VXN
miR-3124-3p (and other miRNAs w/seed CUUUCCU)	mature microRNA		0	0.0157	AMER2,DST,ID4,PAG1,PAX6,PLP1
miR-1203 (miRNAs w/seed CCGGAGC)	mature microRNA		0	0.0346	MCAM,PTP4A3,SFRP2,UNC119
miR-4645-3p (miRNAs w/seed GACAGUA)	mature microRNA		0	0.0328	CA10,JUN,LUM,PDE6H
miR-12185-3p (and other miRNAs w/seed CAGCCAC)	mature microRNA		0	0.0127	CCDC34,DENND11,DIPK1C,H4C3,LBH,PAG1,TAGLN2,TFF1
miR-1284 (and other miRNAs w/seed CUAUACA)	mature microRNA		0	0.0131	ID4,MEST,RXRG,SPCS1
KAT6A	enzyme		0	0.00937	COL2A1,GSTP1,SOX9,TF
MACROH2A1	other		0	2.59e-05	ASCL1,EGR1,ID1,SOX2,SPARC,TFF1,VXN	120 (12)
TWIST2	transcription regulator		0	0.000164	CCND1,CD24,CD44,SOX2,VIM	83 (12)
ARNT	transcription regulator		0	0.00203	BAMBI,CXCR4,GAS1,ID2,SOX2,SPP1,VIM	141 (18)
SIX1	transcription regulator		0	0.0394	ACTC1,CAMK2B,CLU,OTX2
PIAS1	transcription regulator		0	0.00896	CCND1,EPHB2,SLC17A7,SYP
SYVN1	transporter		0	0.00477	CCND1,CD44,DUSP1,HLA-A,HLA-C,MCAM	92 (7)
FOXA2	transcription regulator		0	0.00163	ACTC1,CCND1,CXCR4,DCT,FABP5,PAX6,PYGL,RORA,TF,TRH,VIM	102 (17)
PPIF	enzyme		0	0.0182	CMTM6,CXCR4,HEY1,MEIS2
ERBB4	kinase		0	0.0152	CCND1,DUSP1,EGR1,JUN
miR-6366 (miRNAs w/seed GCUAAGG)	mature microRNA		0	0.000713	AIPL1,DCT,FXYD1,RCVRN,RLBP1,TTYH1
miR-6717-5p (miRNAs w/seed GGCGAUG)	mature microRNA		0	0.0252	ASCL1,ATP1A3,PTP4A3,TRH
NR1I2	ligand-dependent nuclear receptor		0	0.0176	EGR1,GSTP1,HMGCS1,JUN,MYB,TF
PDK1	kinase		0	0.00551	ID3,PAG1,PIK3R1,VIM
miR-627-3p (miRNAs w/seed CUUUUCU)	mature microRNA		0	0.0457	ASCL1,CPE,DST,FBXW7
miR-6798-5p (miRNAs w/seed CAGGGGG)	mature microRNA		0	0.00193	CADM3,FXYD1,GAS1,GNAI2,HES4,HMGA1,HPCA,LBH,NDRG1,TAGLN2,TLE3,TTYH1
miR-8110 (miRNAs w/seed AGCGUGG)	mature microRNA		0	0.00611	CA10,CMTM6,HLA-A,RASSF4
miR-6881-3p (miRNAs w/seed UCCUCUU)	mature microRNA		0	0.0302	AMER2,DST,L1TD1,PMEPA1,RASSF4,SLC38A5
miR-651-3p (miRNAs w/seed AAGGAAA)	mature microRNA		0	0.0102	BCHE,GRIA4,TPD52,VSX1
miR-6828-3p (miRNAs w/seed UCUGCUC)	mature microRNA		0	0.0103	CRYBG3,DST,ID4,LBH,MIR9-1HG,VCAN
miR-292b-3p (miRNAs w/seed AGAGCCC)	mature microRNA		0	0.000561	ANKRD33B,CREB5,H3-3A/H3-3B,HEY1,JUND,LHX4,PCBP4,SPP1
miR-6828-5p (miRNAs w/seed GGAAGCA)	mature microRNA		0	0.0143	ASCL1,FAM89A,LBH,MLEC,PCBP4,RTN4
HIC1	transcription regulator		0	4.43e-05	CCND1,ID4,MCAM,SNAP25,SOX9,SPP1	75 (7)
HAVCR1	other		0	0.00579	CALR,CCN1,CD24,JUN,SPARC	6 (2)
miR-1909-3p (and other miRNAs w/seed GCAGGGG)	mature microRNA		0	0.00838	ATP6V0B,COL4A2,CRX,ETV5,FBXW7,GNAI2,HES4,HLA-A,HPCA,KCNK3,NFIB,NUDT3,PMEPA1,RASSF4,SOX8,SPARC,SYP,TAGLN2,TTYH1,UNC119
miR-101-3p (and other miRNAs w/seed ACAGUAC)	mature microRNA		0	0.00453	CSRP2,DUSP1,FOS,NEUROD1,NLK,RNF180,SOX9,STMN1
DNAJB6	transcription regulator		0	2.58e-05	DKK1,SPARC,SPP1,VIM	123 (13)
EIF2AK4	kinase		0	0.00253	EGR1,PLP1,PRDM1,PYGL
IgG	complex		-0.021	0.00381	ATP1B1,CALR,DUSP1,EGR1,FABP5,GUK1,IFITM3,JUND,NOTCH1,PMEPA1	154 (21)
DLK1	other		-0.025	4.95e-06	HES1,HEY1,NOTCH1,SOX2,SOX9,SYP	98 (18)
MRTFA	transcription regulator		-0.028	5.21e-07	ACTC1,CCN1,CD24,CD44,CXCR4,EGR1,FOS,GAS1,HLA-A,ID1,NFIB,SLC1A2,TFF1	104 (16)
mir-221	microRNA		-0.038	0.000987	KDR,NES,PIK3R1,SPP1
FOXO1	transcription regulator		-0.065	6.82e-05	ATP6V0B,CCND1,CCNG2,COL2A1,COL4A2,EGR1,FABP5,FOS,JUN,NEUROD1,PRDM1,SOX2,SOX4,SOX9,SPRY2,SQLE	130 (19)
C1QA	other		-0.068	0.000389	CD44,EGR1,SYP,VIM	114 (11)
TGFB2	growth factor		-0.077	5.56e-07	EGR1,FOS,GAS1,HEY1,ID4,KDR,NOTCH1,SPP1,VCAN,VIM	131 (18)
CD3	complex		-0.088	0.000481	BAMBI,CCND1,CD44,CRB1,CXCR4,FOS,HSPA1A/HSPA1B,ID3,ID4,JUN,KCNK3,PDE6H,PYGL,RORA,STMN1,TFDP2,ZFP36L1	131 (24)
KRAS	enzyme		-0.1	5.88e-14	ATP1B1,BSG,CCN1,CCND1,CD24,CD44,CLU,CXCR4,DENND2B,DKK1,DUSP1,EGR1,ETV5,FABP5,FOS,GAS1,GPM6B,GSTP1,H1-2,HES1,HMGA1,ID1,IFITM3,IGFBP2,INSM1,JUN,LBH,LUM,MCAM,RARRES2,REST,SOX2,SOX9,SPARC,SPP1,SPRY2,TLE3,VCAN,VIM,ZFP36L1	122 (20)
OTX2	transcription regulator		-0.1	2.68e-08	DCT,DKK1,NRL,PAX6,PRDM1,PTPRZ1,RBP3,SOX2,TF
PGR	ligand-dependent nuclear receptor		-0.102	6.66e-05	ATP1B1,CADM3,CCND1,CD44,DST,FOS,GPM6B,HES1,ID1,MYO10,NDRG1,SNAP25,SPRY2,STMN1,TFF1,VCAN	153 (22)
RXRA	ligand-dependent nuclear receptor		-0.104	0.00172	CCND1,CLU,FABP5,FOS,GADD45G,RLBP1,RORA,RXRG,SAT1,SPP1,TRH,VCAN	128 (23)
IFNG	cytokine		-0.11	1.47e-08	AMER2,ASCL1,ATP1B1,CCND1,CD44,CRABP1,CXCR4,DCT,DKK1,DUSP1,EGR1,FABP5,FOS,GNAI2,GSTP1,HES1,HLA-A,HLA-B,HLA-C,HMGA1,HMGCS1,HSPA1A/HSPA1B,ID1,ID2,IFITM3,JUN,JUND,KDR,MYB,NEUROD1,NOTCH1,PAX6,PRDM1,RCVRN,SLC1A2,SLC1A3,SNAP25,SPP1,SQLE,STX3,TPH1,TRH,VIM	135 (16)
CEBPD	transcription regulator		-0.112	0.00626	CCND1,CLU,CXCR4,FBXW7,FOS	133 (23)
NCOA2	transcription regulator		-0.113	0.00203	CCND1,EGR1,HLA-A,HMGCS1,MYB,RORA,TFF1	152 (24)
miR-144-3p (miRNAs w/seed ACAGUAU)	mature microRNA		-0.128	0.0248	CCNG2,FABP5,ID4,JUN,MEIS2,TPD52
CDKN1B	other		-0.14	0.000428	CCND1,EGR1,EPB41,GRIA4,LGR4,MEIS2,SOX2	127 (22)
MITF	transcription regulator		-0.141	8.81e-07	CA14,CCNG2,CD44,COL2A1,CRX,DCT,FOS,GPM6B,HES1,OTX2,PAX6,QDPR,SOX9,TPH1
SOX2	transcription regulator		-0.146	2.93e-14	ASCL1,CCND1,CD44,CXCR4,DKK1,DKK3,DUSP1,ETV5,FABP7,FOS,GLI3,HES5,HEY1,ID2,ID3,JUN,KDR,NEUROG1,NOTCH1,OTX2,PAX6,PIK3R1,PLP1,PRDM1,SOX2,SOX8,SPP1,TF,VCAN,VIM	139 (17)
LRP6	transmembrane receptor		-0.152	3.66e-05	CCND1,DKK1,FOS,SPP1,TTYH1,VIM	138 (22)
TNC	other		-0.152	0.00128	COL2A1,DKK1,FOS,ID2	92 (13)
MST1	growth factor		-0.152	0.00015	CCND1,FOS,SOX4,SPP1	120 (23)
mir-142	microRNA		-0.152	0.00676	HLA-A,MCAM,MYB,SOX2	77 (7)
NFATC1	transcription regulator		-0.152	0.00836	CCND1,NEUROD1,PAG1,PRDM1,SPP1	119 (21)
Hif1	complex		-0.152	0.00896	CCNG2,CD24,CXCR4,TF
IL10RA	transmembrane receptor		-0.196	0.00194	CCN1,CSRP2,DDHD1,DKK1,FABP5,HLA-A,LUM,MYB,PYGL,SPARC
JUND	transcription regulator		-0.2	0.000265	CCND1,CLU,JUND,SAT1,SOX4,SPP1
NTRK2	kinase		-0.2	1.57e-08	CCND1,EGR1,FOS,PIK3R1,SNAP25,SOX9,SPP1,SYP,SYT1,VIM	123 (20)
CD28	transmembrane receptor		-0.213	0.0142	CCND1,CRB1,CXCR4,FOS,HSPA1A/HSPA1B,JUN,PDE6H,PRDM1,RORA
LIN28B	other		-0.218	0.000576	CD44,COL2A1,SOX2,SOX9,VIM	75 (7)
MED1	transcription regulator		-0.218	0.00249	CCND1,CREB5,GSTP1,ID2,INSM1,PRDM1,SOX2,TFF1	104 (15)
KDM1A	enzyme		-0.225	0.000697	CRYM,DKK1,HLA-A,ID2,IFITM3,IGFBP2,NES,RARRES2,SFRP2,SNAP25,SOX2,VIM	112 (11)
miR-4731-5p (miRNAs w/seed GCUGGGG)	mature microRNA		-0.243	0.00355	CADM3,CALR,GNAI2,HES4,KCNK3,L1TD1,LBH,MCAM,MDGA1,NEUROG1,PLXDC1,QDPR,RARRES2,RASSF4,SFRP2,SRRM4,TFF1
miR-6909-5p (miRNAs w/seed AGGGGGG)	mature microRNA		-0.243	4.65e-06	CALR,CCN1,DIPK1C,DPYSL4,DUSP1,EPHB2,FZD5,ITSN1,MOB3B,SEZ6L2,SOX2,SOX4,SPARC,SPRY2,SYP,TLE3,TULP1
EZH2	transcription regulator		-0.243	1.14e-07	CADPS,CCND1,CXCR4,DKK1,EGR1,ID1,MYO10,NDRG1,NES,NEUROD1,NLK,PAX6,PRDM1,PTP4A3,RORA,SFRP2,SLC1A3,SPARC,TPD52,WIF1	144 (20)
SMAD7	transcription regulator		-0.254	0.00132	COL2A1,ID1,ID2,ID3,PMEPA1,SOX2,SOX9	124 (19)
RELA	transcription regulator		-0.272	2.73e-07	CCND1,CD44,COL2A1,CXCR4,DUSP1,EGR1,FOS,HES1,HLA-A,HLA-B,ID1,IGFBP2,JUN,LUM,MYB,NOTCH1,PRDM1,SLC1A2,SOX9,VIM	135 (18)
MAP3K12	kinase		-0.277	0.000233	JUN,STMN1,SYT1,TUBB
RAX	transcription regulator		-0.277	4.98e-07	HES1,NOTCH1,OTX2,RCVRN,RLBP1
miR-6751-5p (and other miRNAs w/seed UGGGGGU)	mature microRNA		-0.277	0.0115	CLU,CRABP1,GNAI2,HMGA1,HPCA,ID3,KCNK3,MDGA1,MEIS2,RAX,SORCS1,TLCD3B,ZNF385A
IL4	cytokine		-0.282	0.00554	ATP1A3,CCND1,CD44,CKB,CRABP1,CXCR4,DCT,DDHD1,FOS,GADD45G,GATB,GPM6B,HSPA1A/HSPA1B,ID3,IFITM3,JUN,JUND,NDRG1,PIK3R1,PRDM1,RASSF4,SOX2,SPP1,VIM	117 (20)
GATA4	transcription regulator		-0.285	6.01e-06	ACTC1,ASCL1,CXCR4,FOS,GAS1,HES1,ID1,JUN,OTX2,PRDM1,SOX9,SPP1,VIM
miR-3180-3p (and other miRNAs w/seed GGGGCGG)	mature microRNA		-0.302	0.0129	ATP1A3,FXYD1,GAS1,HMGA1,HPCA,IGFBP2,JUND,NEUROG1,RAX,TLCD3B,ZNF385A
ESRRA	transcription regulator		-0.302	0.000512	ACTC1,ATP1A3,CKB,COL4A2,CSRP2,CXCR4,FZD5,HMGCS1,PLXDC1,SPP1,TFF1	111 (8)
CEBPB	transcription regulator		-0.304	3.58e-05	CCND1,CLU,CXCR4,FOS,GAS1,HLA-A,HMGA1,ID1,IFITM3,JUN,PRDM1,RORA,SAT1,SPP1,STMN1,TF,TUBB,VCAN,VIM	134 (19)
PTP4A1	phosphatase		-0.308	5.56e-07	DNAJB1,GSTP1,HSPA1A/HSPA1B,PIK3R1,PTP4A3,SPARC,STMN1,TAGLN2,VCAN,VIM
FASLG	cytokine		-0.313	0.00018	CD24,CD44,EGR1,FOS,SOX2	106 (20)
IL2	cytokine		-0.314	0.000246	CCND1,CCNG2,CD44,CXCR4,DUSP1,FOS,GADD45G,H1-2,HMGCS1,HSPA1A/HSPA1B,JUN,JUND,MYB,NDRG1,PRDM1,SPP1,SQLE,STMN1,TFDP2,VIM	118 (18)
POU4F1	transcription regulator		-0.314	0.000179	ACTC1,CRABP1,ETV5,MSI2,NEUROD1,NEUROD4,SNAP25
WNT3A	cytokine		-0.328	7.43e-13	ATP1B1,CALR,CCN1,CCND1,CD44,COL2A1,DKK1,ETV5,GADD45G,GAS1,ID1,JUN,KDR,LBH,PMEPA1,PRDM1,SFRP2,SLC1A3,SOX4,SOX9,SPARC,SSTR2,VIM,WIF1	140 (20)
NANOG	transcription regulator		-0.333	2.43e-06	EGR1,FOS,HSPA1A/HSPA1B,ID1,ID2,ID3,ID4,KDR,PAX6,REST,SOX2	114 (9)
miR-103-3p (and other miRNAs w/seed GCAGCAU)	mature microRNA		-0.333	0.0462	HMGA1,OLFM1,PLEKHA1,RASSF4,TAGLN3,TLCD3B,TLE4,TPD52,VCAN
CASR	G-protein coupled receptor		-0.333	1.56e-05	CCND1,CD44,COL4A2,EGR1,GADD45G,GNAI2,ID1,LBH,SSX2IP	125 (18)
SMARCB1	transcription regulator		-0.335	1.23e-08	ASCL1,ATP1B1,CCND1,CD44,CXCR4,FOS,GLI3,HES1,HES5,HEY1,IGFBP2,OTX2,PAX6,SOX9,SPARC	132 (18)
TRIM37	enzyme		-0.339	0.00118	CKB,EGR1,MYB,VIM
BRCA1	transcription regulator		-0.342	0.000161	CAMK2B,CCND1,EGR1,H3-3A/H3-3B,NOTCH1,SAT1,TFF1,VCAN,VIM	142 (21)
CSF3	cytokine		-0.36	0.0325	CD44,CXCR4,EGR1,FOS,GADD45G,JUN
miR-329-3p (and other miRNAs w/seed ACACACC)	mature microRNA		-0.378	0.0277	DNAJB1,H4C3,HEY1,LBH,MCAM,NUDT3,TPD52
miR-432-3p (and other miRNAs w/seed UGGAUGG)	mature microRNA		-0.378	0.0489	ATP6V0B,CADM2,GSE1,MLEC,SFRP2,SOX2,YPEL2
miR-3552 (miRNAs w/seed GGCUGCA)	mature microRNA		-0.378	0.0321	CA10,CADM3,GAS1,GATB,HPCA,KCNK3,PLEKHA1
miR-4267 (miRNAs w/seed CCAGCUC)	mature microRNA		-0.378	0.00946	BAMBI,DST,FOS,H1-2,MEST,ROM1,UNC119
DUSP1	phosphatase		-0.378	0.00118	DKK1,DUSP1,IFITM3,JUN,LUM,PIK3R1,PRDM1	146 (21)
TWIST1	transcription regulator		-0.384	3.57e-06	CD44,CLU,COL2A1,DKK3,FOS,PTPRZ1,SOX2,SPP1,TF,VCAN,VIM	112 (13)
HIF1A	transcription regulator		-0.389	0.00127	CCN1,CCND1,CD24,CD44,CXCR4,FOS,H1-2,ID1,ID2,IGFBP2,JUN,NDRG1,NOTCH1,SOX9,VIM	138 (21)
DIO3	enzyme		-0.391	0.0106	DCT,HLA-A,NEUROD1,PEX5L,PYGL,TRH
PTTG1	transcription regulator		-0.391	0.00167	CCND1,CD44,CLU,SOX2,VIM	125 (15)
KNG1	other		-0.392	0.000344	CALR,CCND1,FOS,KDR	130 (25)
EIF2AK3	kinase		-0.404	0.0056	CCND1,EGR1,JUN,NDRG1,PRDM1,SLC1A7	132 (21)
MAPK9	kinase		-0.413	0.0029	EGR1,FOS,HMGA1,HMGCS1,IGFBP2,JUN,JUND	134 (23)
miR-466d-5p (and other miRNAs w/seed GUGUGUG)	mature microRNA		-0.414	0.046	ASCL1,CA10,CCND1,CRB1,DKK1,HPCA,KCNV2,LUM,MEIS2,MLEC,NR2E1,PLP1,RBP3,RCVRN,RORA,SLC1A2,SNAP25,SRGAP3,TPH1,TRH,VXN
mir-10	microRNA		-0.418	0.00134	CCN1,CD44,DCT,EPHB2,FZD5,PRDM1
miR-146a-5p (and other miRNAs w/seed GAGAACU)	mature microRNA		-0.426	0.00244	BSG,CXCR4,GPM6B,HEY1,HLA-A,HSPA1A/HSPA1B,RNLS,SLC38A5,SYT1
miR-6835-5p (and other miRNAs w/seed GGGGGUA)	mature microRNA		-0.434	0.0276	ASCL1,ETV5,GNAI2,HPCA,JUND,KCNK3,MEIS2,NEUROG1,PRSS35,SOX4,SPARC,STX3,TLCD3B,ZFP36L1
ADCYAP1	other		-0.441	1.1e-11	CHGB,CNN3,DDHD1,DLL3,EGR1,FOS,GAS1,ID3,LUM,MCAM,MEST,NEUROD1,SLC1A2,SLC1A3,SNAP25,SPARC,TCF4,TRH,TTYH1	131 (20)
PRKCD	kinase		-0.444	0.000212	CCND1,FOS,JUN,LBH,NES,NOTCH1,RYBP,SOX2,TFF1	124 (20)
LLGL2	other		-0.447	1.44e-05	CCN1,DUSP1,ETV5,NDRG1,STMN1
Ifn	group		-0.447	0.0099	CD44,FOS,HLA-A,IFITM3,SPP1	112 (22)
NFAT5	transcription regulator		-0.447	0.0263	CD24,CD44,DKK1,PRSS35,SPP1
DSCAM	other		-0.447	0.00336	ETV5,GADD45G,ID3,SRGAP3,VIM
miR-335-3p (miRNAs w/seed UUUUCAU)	mature microRNA		-0.447	0.00475	COL4A2,DST,SPARC,SPCS1,VCAN
miR-3678-3p (miRNAs w/seed UGCAGAG)	mature microRNA		-0.447	0.0263	BAMBI,GADD45G,ID4,PRDM1,SRRM4
miR-582-3p (miRNAs w/seed AACUGGU)	mature microRNA		-0.447	0.00241	CA10,CADM2,DBI,ELP4,VSX1
miR-205-5p (and other miRNAs w/seed CCUUCAU)	mature microRNA		-0.447	0.0368	COL16A1,DKK1,DST,HLA-A,LUM
miR-3166 (miRNAs w/seed GCAGACA)	mature microRNA		-0.447	0.0309	CADM2,CAMK2B,CCNG2,DIPK1C,HMGN3
miR-802-3p (and other miRNAs w/seed CGGAGAG)	mature microRNA		-0.447	0.0416	ATP1A3,MLEC,PLXDC1,SORCS1,UNC119
miR-4264 (miRNAs w/seed CUCAGUC)	mature microRNA		-0.447	0.00336	EEF1D,HLA-A,HLA-C,MGARP,YPEL2
miR-4781-5p (miRNAs w/seed AGCGGGG)	mature microRNA		-0.447	0.0375	CLU,RAX,SLC1A7,TLCD3B,TPH1
miR-7036a-3p (miRNAs w/seed CGUCCUC)	mature microRNA		-0.447	0.00336	EPHB2,GADD45G,SOX9,SYP,TLE3
miR-3544-5p (miRNAs w/seed GAAAGGC)	mature microRNA		-0.447	0.0195	CA10,CHGB,CREB5,DKK3,OLFM1
KAT5	transcription regulator		-0.447	0.00518	CALR,CCND1,COL2A1,CXCR4,GRIA4,PTPRZ1,TFF1
DDIT3	transcription regulator		-0.447	0.0124	CRX,NDRG1,NRL,SOX2,VIM
SP110	transcription regulator		-0.447	0.0175	CCN1,CLU,IFITM3,RARRES2,SOX4
TREM2	transmembrane receptor		-0.447	0.000927	BAMBI,FABP5,HLA-A,SYP,WIF1	72 (7)
miR-4271 (and other miRNAs w/seed GGGGAAG)	mature microRNA		-0.452	0.0122	DAPL1,EGR1,FXYD1,HMGA1,IGDCC3,IGFBP2,KCNK3,KLHDC8A,MLEC,MLLT11,RASSF4,RORA,RXRG,STON2,SYP,TAGLN2,YPEL2,ZNF385A
FGF21	growth factor		-0.453	0.00979	CCND1,EGR1,FOS,VIM	130 (22)
LDL	complex		-0.455	0.000947	CAMK2B,CCND1,DUSP1,EGR1,FOS,ID1,IGFBP2,JUN,MIR124-1HG,NLK	114 (24)
NR3C1	ligand-dependent nuclear receptor		-0.463	7.9e-06	ATP1B1,CCN1,CCND1,CXCR4,DBI,DUSP1,EGR1,FOS,GAS1,GRIA4,GSTP1,HLA-C,JUN,JUND,MEST,PIK3R1,PYGL,RTN4,SLC1A7,SOX4,SPP1,TLE3,VIM	115 (20)
FAT1	other		-0.463	6.89e-06	CD24,CD44,JUN,SOX2,VIM	108 (12)
BRD4	kinase		-0.463	1.78e-05	CCND1,CXCR4,FOS,ID2,INSM1,MYB,PRDM1,SLC38A5,SPP1,TUBB	123 (18)
Ngf	group		-0.465	1.02e-06	CCND1,CHGB,CLU,DUSP1,EGR1,FOS,JUN,MYB	119 (24)
TCR	complex		-0.472	5.71e-05	BSG,CCND1,CD44,CXCR4,EGR1,ETV5,FOS,GADD45G,ID3,JUN,PIK3R1,PRDM1,SPP1,TLE3	125 (24)
SMARCA4	transcription regulator		-0.482	3.32e-09	BAMBI,CA14,CCND1,CD44,CXCR4,DCT,EGR1,EPHB2,FOS,GADD45G,GSTP1,HEY1,HLA-B,HLA-C,ID3,IFITM3,JUN,KDR,LUM,MYB,OCIAD2,SOX2,SPP1,SPRY2,TFF1,TUBB,VIM	116 (26)
LRP1	transmembrane receptor		-0.485	0.00468	COL2A1,GLI3,SOX9,SPTAN1	51 (7)
CLDN7	other		-0.485	0.00197	DKK1,GRINA,HLA-B,LGR4,MLEC,PRSS23
NFKB1	transcription regulator		-0.502	0.000499	BAMBI,CCN1,CCND1,CD44,COL2A1,DUSP1,EGR1,FOS,HES5,MYB,SOX9	133 (20)
MEF2C	transcription regulator		-0.503	2.75e-07	ACTC1,CALR,CKB,COL2A1,CXCR4,FABP7,FOS,JUN,JUND,PLP1,SFRP2,VIM	96 (12)
WNT1	cytokine		-0.524	2.71e-09	CCND1,CD24,DKK1,EGR1,FOS,GADD45G,GAS1,HES1,HES5,JUN,LBH,OTX2,SPP1	129 (19)
LMNA	other		-0.528	0.000369	BAMBI,CCNG2,FBXW7,H3-3A/H3-3B,HMGA1,ID3,JUN,JUND,MCAM,NES,SPP1	124 (19)
miR-6795-5p (and other miRNAs w/seed GGGGGGA)	mature microRNA		-0.535	0.035	ATP1A3,ATP6V0B,BCHE,CADM3,CLU,GNAI2,GRINA,HMGA1,HPCA,JUND,MDGA1,NES,RAX,ZNF385A
RARB	ligand-dependent nuclear receptor		-0.547	0.000115	ASCL1,EGR1,HLA-C,ID1,ID3,JUN,OTX2,SOX2,SPP1	112 (10)
MIR17HG	other		-0.555	0.0109	CCND1,CPE,DLL3,REST,SOX4
CBX5	transcription regulator		-0.555	0.012	CD24,H1-2,PRSS23,RORA,TLE4
HOXA9	transcription regulator		-0.555	3.97e-06	DCT,FZD5,GLI3,ID2,JUN,MSI2,MYB,NLK,SOX4,SPP1,VIM
HRAS	enzyme		-0.557	2.98e-14	ASCL1,ATP1A3,CCN1,CCND1,CD24,CD44,CLU,COL2A1,CSRP2,DUSP1,EGR1,ETV5,FOS,GADD45G,HES1,HES5,HEY1,HLA-B,ID2,JUN,LBH,MCAM,NOTCH1,PMEPA1,PRSS23,RTN4,SLC1A7,SOX4,SPARC,SPP1,SPRY2,SQLE,TPH1,VCAN,VIM	131 (21)
GNAS	enzyme		-0.557	0.0007	CCN1,FOS,GADD45G,HES5,PMEPA1,SCG3,SPARC,SPP1	138 (24)
ISG15	other		-0.557	9.7e-06	BCHE,HLA-A,HLA-B,HLA-C,IFITM3,VCAN
CD40LG	cytokine		-0.558	6.7e-06	CCNG2,CD44,CLU,CXCR4,DUSP1,EGR1,FOS,GATB,HSPA1A/HSPA1B,ID2,ID3,JUN,JUND,PRDM1,TUBB,ZFP36L1	126 (21)
miR-3084a-3p (and other miRNAs w/seed UCUGCCA)	mature microRNA		-0.563	0.0492	AMER2,CRX,ELP4,EPB41,ID2,MFNG,NFIB,PMEPA1
NCOA3	transcription regulator		-0.566	1.28e-05	CCN1,CCND1,CD44,HES1,HES5,KDR,SOX2,TFF1	124 (21)
Lh	complex		-0.57	0.00421	ATP2B1,CXCR4,DUSP1,EGR1,FOS,GADD45G,JUN,NLK,SNAP25,TCF4	157 (27)
KAT2A	enzyme		-0.573	8.77e-07	CCND1,CSRP2,FABP5,H4C3,HES5,HMGA1,JUN,PIK3R1,SYT1,TFF1	121 (12)
miR-485-5p (and other miRNAs w/seed GAGGCUG)	mature microRNA		-0.577	0.0113	ATP1B2,BSG,CRX,EPHB2,FABP7,FAM89A,GATB,ID1,NR2E1,PLEKHA1,SLC1A2,SRRM4
GNA12	enzyme		-0.577	0.0102	FOS,GSTP1,PIK3R1,VIM
ESR1	ligand-dependent nuclear receptor		-0.579	5.63e-11	ACTC1,ATP1B1,ATP2B1,CAMK2B,CCN1,CCND1,CCNG2,CKB,COL16A1,CPE,DST,EGR1,FBXW7,FOS,GADD45G,H4C3,HES1,HEY1,HLA-B,HLA-C,ID1,IFITM3,IGFBP2,JUN,JUND,MAP7,MYB,NLK,NOTCH1,OTX2,PLXDC1,PRSS23,PYGL,SAMD11,SLC17A7,SOX4,SOX9,SPP1,SPTAN1,SSX2IP,STX3,TFF1,TPD52,UNC119,VIM	168 (26)
NOTCH3	transcription regulator		-0.59	1.54e-06	FABP7,HES1,HES5,HEY1,ID1,KDR,NOTCH1,SPARC
STAT5a/b	group		-0.6	0.00261	CCND1,CLU,DUSP1,FOS,ID2,PRDM1	105 (22)
ROR1	kinase		-0.6	0.000109	CCN1,ETV5,NDRG1,STMN1,VIM	37 (3)
CCL5	cytokine		-0.6	0.0015	CD44,DUSP1,FOS,HMGA1,SQLE	129 (24)
TNFSF11	cytokine		-0.613	1.35e-05	BSG,CCND1,CD44,CKB,DKK1,DUSP1,FOS,JUN,PAG1,PRDM1,SOX8,SPP1,STMN1	101 (19)
RASSF1	other		-0.616	3.26e-10	CCND1,CLU,COL4A2,CPE,CXCR4,DKK1,EGR1,FOS,HES1,SOX9,SPP1,TUBB	136 (22)
miR-31-5p (and other miRNAs w/seed GGCAAGA)	mature microRNA		-0.632	0.00893	BAMBI,CRYBG3,DIPK1C,DKK1,FAM89A,LBH,RASSF4,SCG3,SLC1A2,SPARC
TRAP1	enzyme		-0.651	0.00352	CADM3,CD44,NES,SOX2,TMA16	76 (7)
PLCG1	enzyme		-0.651	5.12e-05	CCND1,EGR1,FOS,KDR	139 (23)
PLAU	peptidase		-0.651	0.000987	CCN1,CCND1,IGFBP2,KDR,VIM	138 (21)
miR-3072 (and other miRNAs w/seed GCCCCCU)	mature microRNA		-0.653	0.0174	FZD5,GAS1,ID1,MFNG,PCBP4,PLP1,PTP4A3,RCVRN,SYP,TLCD3B,TTYH1,ZNF385A
MTOR	kinase		-0.655	0.0433	ATP2B1,CCND1,CXCR4,DUSP1,FABP5,FOS,PLP1,SOX4
miR-6887-3p (miRNAs w/seed CCCCUCC)	mature microRNA		-0.655	4.37e-06	CADM3,CCN1,FXYD1,HEY1,HMGA1,HPCA,JUN,L1TD1,MLEC,NES,RCVRN,RLBP1,RORA,RYBP,SOX2,SOX4,SYP,TLCD3B,TULP1,YPEL2,ZNF385A
SRF	transcription regulator		-0.664	0.000163	ACTC1,CSRP2,CXCR4,EGR1,FABP5,FOS,GADD45G,JUN,KDR,LBH,MPPED2,MYB,VCAN	97 (14)
SNAI1	transcription regulator		-0.68	2.81e-09	CCN1,CCND1,CD44,COL2A1,DKK1,FOS,ID1,ID4,NES,RORA,SOX2,SPARC,TF,VIM	132 (21)
miR-212-5p (miRNAs w/seed CCUUGGC)	mature microRNA		-0.707	0.0433	CCN1,MIR124-1HG,MPPED2,RAX,SRRM4,TLCD3B,TMEM37,VXN
miR-881-5p (miRNAs w/seed AGAGAGA)	mature microRNA		-0.707	0.0264	AIPL1,ATP1A3,DKK1,H4C3,INSM1,KCNK3,NR2E1,TAGLN2
[truncated: 1,785 more rows]

## Sheet: RGCs
Upstream Regulator	Molecule Type	Predicted Activation State	Activation z-score	p-value of overlap	Target Molecules in Dataset	Mechanistic Network
[truncated: 2,518 more rows]

[truncated: 7 more sheets: HCs, ACs, Cone precursors, Cones, Rod precursors, Rods, BPs]
