# Supplementary material for: Spatiotemporal single cell analyses reveal a transient population of retinal progenitor cells in the ciliary margin of developing human retina
Source: Research Square preprint supplement (doi:10.21203/rs.3.rs-3160527/v1), 2023-07-13
Supplement: Supplementary file 3 [file 41bfc91c47dbc1ac58537d57.xlsx]

## Sheet: integrated UMAP 
Integrated scRNA-Seq data from all human embronyonic/fetal samples shown on Table S1
	p_val	avg_log2FC	pct.1	pct.2	p_val_adj	cluster	gene	cell fate
CCND1	0	1.52644	0.94	0.53	0	0	CCND1	Retinal progenitor cells
TF	0	1.51298	0.625	0.267	0	0	TF	Retinal progenitor cells
SPP1	0	1.4398	0.927	0.515	0	0	SPP1	Retinal progenitor cells
ZFP36L2	0	1.35345	0.937	0.589	0	0	ZFP36L2	Retinal progenitor cells
SOX2	0	1.28865	0.941	0.529	0	0	SOX2	Retinal progenitor cells
AC009041.2	0	1.17778	0.425	0.151	0	0	AC009041.2	Retinal progenitor cells
TTYH1	0	1.15195	0.866	0.49	0	0	TTYH1	Retinal progenitor cells
PMEPA1	0	1.12427	0.785	0.508	0	0	PMEPA1	Retinal progenitor cells
HES4	0	1.09983	0.759	0.48	0	0	HES4	Retinal progenitor cells
DDHD1	3.42e-306	1.08114	0.566	0.343	8.81e-302	0	DDHD1	Retinal progenitor cells
LINC00461	0	1.07311	0.7	0.429	0	0	LINC00461	Retinal progenitor cells
SOX9	0	1.06432	0.679	0.382	0	0	SOX9	Retinal progenitor cells
ZFP36L1	0	1.0635	0.814	0.431	0	0	ZFP36L1	Retinal progenitor cells
VIM	0	1.03518	0.996	0.803	0	0	VIM	Retinal progenitor cells
HES5	0	1.03357	0.639	0.356	0	0	HES5	Retinal progenitor cells
SFRP2	0	1.02772	0.743	0.392	0	0	SFRP2	Retinal progenitor cells
PRSS35	0	1.02344	0.443	0.201	0	0	PRSS35	Retinal progenitor cells
CLU	0	1.01734	0.853	0.558	0	0	CLU	Retinal progenitor cells
PLP1	0	1.01434	0.471	0.215	0	0	PLP1	Retinal progenitor cells
GPM6B	0	1.01368	0.792	0.545	0	0	GPM6B	Retinal progenitor cells
TRPM3	5.66e-288	0.982284	0.426	0.204	1.46e-283	0	TRPM3	Retinal progenitor cells
QDPR	7.81e-247	0.980615	0.568	0.373	2.01e-242	0	QDPR	Retinal progenitor cells
LINC01833	9.06e-293	0.977846	0.593	0.377	2.33e-288	0	LINC01833	Retinal progenitor cells
GAS1	7.46e-231	0.934701	0.451	0.245	1.92e-226	0	GAS1	Retinal progenitor cells
GATB	7.12e-274	0.931219	0.518	0.293	1.83e-269	0	GATB	Retinal progenitor cells
MYO10	1.64e-264	0.931043	0.531	0.313	4.23e-260	0	MYO10	Retinal progenitor cells
LGR4	1.02e-286	0.926562	0.612	0.398	2.62e-282	0	LGR4	Retinal progenitor cells
LIMCH1	1.02e-230	0.914979	0.447	0.248	2.63e-226	0	LIMCH1	Retinal progenitor cells
ADAMTS6	1.52e-244	0.88377	0.349	0.158	3.93e-240	0	ADAMTS6	Retinal progenitor cells
STON2	1.11e-236	0.879679	0.514	0.319	2.86e-232	0	STON2	Retinal progenitor cells
MYB	2.86e-275	0.878536	0.498	0.269	7.37e-271	0	MYB	Retinal progenitor cells
FBXW7	7.71e-249	0.877135	0.62	0.422	1.99e-244	0	FBXW7	Retinal progenitor cells
TCF4	2.1e-291	0.874961	0.764	0.576	5.4e-287	0	TCF4	Retinal progenitor cells
COL2A1	2.38e-242	0.864282	0.405	0.199	6.12e-238	0	COL2A1	Retinal progenitor cells
ASCL1	1.13e-301	0.863281	0.673	0.406	2.92e-297	0	ASCL1	Retinal progenitor cells
RNF180	6.08e-205	0.852685	0.371	0.192	1.57e-200	0	RNF180	Retinal progenitor cells
DKK3	0	0.850203	0.763	0.532	0	0	DKK3	Retinal progenitor cells
WIF1	8.6e-174	0.839208	0.245	0.099	2.22e-169	0	WIF1	Retinal progenitor cells
CRB1	2.78e-199	0.835131	0.466	0.285	7.15e-195	0	CRB1	Retinal progenitor cells
SAT1	4.32e-189	0.826588	0.625	0.457	1.11e-184	0	SAT1	Retinal progenitor cells
PLEKHA1	4.25e-148	0.820932	0.538	0.416	1.1e-143	0	PLEKHA1	Retinal progenitor cells
AC007952.4	5.9e-268	0.819178	0.173	0.042	1.52e-263	0	AC007952.4	Retinal progenitor cells
CA14	3.07e-205	0.799409	0.388	0.202	7.9e-201	0	CA14	Retinal progenitor cells
ILDR2	1.31e-172	0.78506	0.448	0.28	3.37e-168	0	ILDR2	Retinal progenitor cells
BTG1	0	0.784627	0.962	0.908	0	0	BTG1	Retinal progenitor cells
KDR	3.52e-208	0.783037	0.375	0.185	9.08e-204	0	KDR	Retinal progenitor cells
FAM69C	3.84e-202	0.780048	0.329	0.155	9.9e-198	0	FAM69C	Retinal progenitor cells
MIAT	3.02e-194	0.778556	0.698	0.548	7.77e-190	0	MIAT	Retinal progenitor cells
RTN4	0	0.777192	0.975	0.887	0	0	RTN4	Retinal progenitor cells
NOTCH1	4.6e-165	0.776464	0.441	0.279	1.18e-160	0	NOTCH1	Retinal progenitor cells
HES1	0	0.772541	0.791	0.439	0	0	HES1	Retinal progenitor cells
FXYD1	8.57e-179	0.759832	0.544	0.372	2.21e-174	0	FXYD1	Retinal progenitor cells
SLC1A3	7.82e-173	0.744513	0.386	0.21	2.02e-168	0	SLC1A3	Retinal progenitor cells
FAM184B	1.79e-139	0.743157	0.369	0.222	4.62e-135	0	FAM184B	Retinal progenitor cells
NES	2.3e-158	0.739696	0.458	0.288	5.93e-154	0	NES	Retinal progenitor cells
C1orf61	5.5e-164	0.738675	0.402	0.224	1.42e-159	0	C1orf61	Retinal progenitor cells
EPHB2	4.73e-133	0.736589	0.472	0.338	1.22e-128	0	EPHB2	Retinal progenitor cells
SPRY2	4.17e-143	0.735079	0.405	0.253	1.07e-138	0	SPRY2	Retinal progenitor cells
RLBP1	5.03e-180	0.732646	0.28	0.123	1.3e-175	0	RLBP1	Retinal progenitor cells
SOX8	1.92e-164	0.732531	0.266	0.12	4.93e-160	0	SOX8	Retinal progenitor cells
LUM	3.82e-180	0.730262	0.263	0.11	9.85e-176	0	LUM	Retinal progenitor cells
JUN	1.63e-305	0.730102	0.92	0.781	4.21e-301	0	JUN	Retinal progenitor cells
MOB3B	3.38e-159	0.727031	0.31	0.158	8.71e-155	0	MOB3B	Retinal progenitor cells
TOX3	1.3e-129	0.719684	0.52	0.397	3.36e-125	0	TOX3	Retinal progenitor cells
CMTM6	1.53e-153	0.712281	0.52	0.374	3.94e-149	0	CMTM6	Retinal progenitor cells
METRN	5.84e-131	0.707963	0.478	0.331	1.51e-126	0	METRN	Retinal progenitor cells
SELENOP	1.92e-188	0.707383	0.571	0.378	4.95e-184	0	SELENOP	Retinal progenitor cells
PRSS23	2.24e-115	0.706321	0.328	0.196	5.77e-111	0	PRSS23	Retinal progenitor cells
REST	3.01e-128	0.703463	0.369	0.229	7.75e-124	0	REST	Retinal progenitor cells
MUM1	1.69e-169	0.702383	0.684	0.583	4.34e-165	0	MUM1	Retinal progenitor cells
MIF	2.53e-144	-0.700761	0.485	0.696	6.51e-140	0	MIF	Retinal progenitor cells
SYT4	4.42e-134	-0.701474	0.049	0.228	1.14e-129	0	SYT4	Retinal progenitor cells
SLC38A5	7.65e-125	-0.702941	0.022	0.176	1.97e-120	0	SLC38A5	Retinal progenitor cells
ELAVL4	1.34e-80	-0.704488	0.038	0.153	3.45e-76	0	ELAVL4	Retinal progenitor cells
SLC1A7	8.19e-136	-0.707067	0.026	0.193	2.11e-131	0	SLC1A7	Retinal progenitor cells
GUK1	1.77e-160	-0.713593	0.28	0.542	4.57e-156	0	GUK1	Retinal progenitor cells
IMPG2	1.69e-113	-0.716959	0.025	0.169	4.36e-109	0	IMPG2	Retinal progenitor cells
MAPT	1.14e-145	-0.719208	0.041	0.226	2.94e-141	0	MAPT	Retinal progenitor cells
NEFM	1.47e-51	-0.721993	0.075	0.173	3.78e-47	0	NEFM	Retinal progenitor cells
OLFM1	1.79e-90	-0.722002	0.058	0.194	4.62e-86	0	OLFM1	Retinal progenitor cells
ATP6V0B	3.32e-215	-0.722788	0.309	0.612	8.54e-211	0	ATP6V0B	Retinal progenitor cells
SRRM4	2.54e-179	-0.725974	0.101	0.348	6.53e-175	0	SRRM4	Retinal progenitor cells
ISL1	1.18e-64	-0.730777	0.028	0.121	3.05e-60	0	ISL1	Retinal progenitor cells
PODXL2	5.61e-201	-0.734606	0.126	0.401	1.44e-196	0	PODXL2	Retinal progenitor cells
ELAVL3	1.2e-140	-0.734702	0.093	0.293	3.09e-136	0	ELAVL3	Retinal progenitor cells
CHGB	1.01e-203	-0.735248	0.028	0.261	2.59e-199	0	CHGB	Retinal progenitor cells
CCNG2	6.88e-182	-0.743854	0.154	0.417	1.77e-177	0	CCNG2	Retinal progenitor cells
SCG5	1.68e-123	-0.744714	0.104	0.29	4.32e-119	0	SCG5	Retinal progenitor cells
FAM161A	4.04e-104	-0.748282	0.203	0.387	1.04e-99	0	FAM161A	Retinal progenitor cells
RXRG	7.89e-138	-0.748556	0.044	0.224	2.03e-133	0	RXRG	Retinal progenitor cells
PKM	5.42e-188	-0.762318	0.61	0.802	1.4e-183	0	PKM	Retinal progenitor cells
UBE2C	9.38e-53	-0.763318	0.04	0.127	2.42e-48	0	UBE2C	Retinal progenitor cells
GNG3	1.59e-139	-0.764761	0.054	0.238	4.09e-135	0	GNG3	Retinal progenitor cells
UBE2S	2.68e-161	-0.771168	0.23	0.492	6.89e-157	0	UBE2S	Retinal progenitor cells
ARL4D	3.14e-137	-0.793436	0.091	0.29	8.09e-133	0	ARL4D	Retinal progenitor cells
AMER2	2.62e-90	-0.797399	0.361	0.541	6.75e-86	0	AMER2	Retinal progenitor cells
TULP1	2.01e-139	-0.798695	0.028	0.2	5.17e-135	0	TULP1	Retinal progenitor cells
NREP	2.56e-207	-0.801559	0.429	0.695	6.59e-203	0	NREP	Retinal progenitor cells
NRXN1	4.31e-181	-0.806015	0.047	0.271	1.11e-176	0	NRXN1	Retinal progenitor cells
MTRNR2L12	2.26e-229	-0.821066	0.195	0.499	5.82e-225	0	MTRNR2L12	Retinal progenitor cells
C4orf48	1.08e-136	-0.827691	0.215	0.435	2.77e-132	0	C4orf48	Retinal progenitor cells
MIR124-2HG	3.95e-206	-0.835911	0.067	0.32	1.02e-201	0	MIR124-2HG	Retinal progenitor cells
TUBB	1.66e-195	-0.845286	0.815	0.917	4.28e-191	0	TUBB	Retinal progenitor cells
RUNX1T1	4.09e-156	-0.853012	0.034	0.225	1.05e-151	0	RUNX1T1	Retinal progenitor cells
CHRNA3	2.37e-196	-0.857843	0.034	0.26	6.1e-192	0	CHRNA3	Retinal progenitor cells
FSTL5	3.54e-162	-0.858721	0.036	0.233	9.12e-158	0	FSTL5	Retinal progenitor cells
RAX2	6.26e-115	-0.858976	0.033	0.182	1.61e-110	0	RAX2	Retinal progenitor cells
LMO4	6.81e-80	-0.866361	0.213	0.389	1.75e-75	0	LMO4	Retinal progenitor cells
ENO2	1.11e-223	-0.873067	0.145	0.433	2.87e-219	0	ENO2	Retinal progenitor cells
TUBB2B	1.44e-141	-0.881679	0.874	0.924	3.72e-137	0	TUBB2B	Retinal progenitor cells
UCHL1	9.6e-123	-0.889871	0.258	0.474	2.47e-118	0	UCHL1	Retinal progenitor cells
LOXL1	3.82e-155	-0.890212	0.079	0.285	9.85e-151	0	LOXL1	Retinal progenitor cells
NSG2	1.38e-187	-0.903406	0.051	0.28	3.56e-183	0	NSG2	Retinal progenitor cells
UNC119	1.22e-162	-0.903754	0.109	0.335	3.14e-158	0	UNC119	Retinal progenitor cells
PCSK1N	4.21e-151	-0.907351	0.202	0.428	1.08e-146	0	PCSK1N	Retinal progenitor cells
BASP1	1.51e-149	-0.913144	0.556	0.745	3.89e-145	0	BASP1	Retinal progenitor cells
SAMD11	1.07e-173	-0.917107	0.085	0.313	2.75e-169	0	SAMD11	Retinal progenitor cells
MT-ND4L	0	-0.919014	0.192	0.556	0	0	MT-ND4L	Retinal progenitor cells
STMN4	4.93e-132	-0.925914	0.134	0.33	1.27e-127	0	STMN4	Retinal progenitor cells
APLP1	4.28e-249	-0.928652	0.071	0.356	1.1e-244	0	APLP1	Retinal progenitor cells
SNAP25	2.1e-246	-0.929284	0.085	0.38	5.42e-242	0	SNAP25	Retinal progenitor cells
SCG3	2.47e-285	-0.939616	0.118	0.449	6.37e-281	0	SCG3	Retinal progenitor cells
TFAP2B	1.36e-89	-0.958263	0.051	0.18	3.51e-85	0	TFAP2B	Retinal progenitor cells
TUBB2A	2e-122	-0.961456	0.326	0.541	5.15e-118	0	TUBB2A	Retinal progenitor cells
CRMP1	1.86e-218	-0.976184	0.239	0.525	4.78e-214	0	CRMP1	Retinal progenitor cells
JPT1	6.83e-198	-0.98072	0.36	0.603	1.76e-193	0	JPT1	Retinal progenitor cells
NTM	2.28e-172	-0.981593	0.113	0.349	5.86e-168	0	NTM	Retinal progenitor cells
ONECUT2	2.46e-121	-0.983648	0.022	0.173	6.33e-117	0	ONECUT2	Retinal progenitor cells
MEIS2	1.77e-56	-0.986341	0.244	0.383	4.56e-52	0	MEIS2	Retinal progenitor cells
ATOH7	6.44e-54	-0.987341	0.024	0.103	1.66e-49	0	ATOH7	Retinal progenitor cells
PRDM1	1.35e-140	-0.989759	0.033	0.207	3.49e-136	0	PRDM1	Retinal progenitor cells
CELF4	8.27e-198	-0.99006	0.057	0.299	2.13e-193	0	CELF4	Retinal progenitor cells
TAGLN3	6.31e-213	-1.02717	0.218	0.492	1.63e-208	0	TAGLN3	Retinal progenitor cells
SEZ6L2	3.36e-296	-1.03179	0.043	0.354	8.64e-292	0	SEZ6L2	Retinal progenitor cells
SNCG	3.9e-57	-1.03422	0.105	0.213	1.01e-52	0	SNCG	Retinal progenitor cells
PTMS	0	-1.03428	0.683	0.883	0	0	PTMS	Retinal progenitor cells
CENPF	8.89e-59	-1.0378	0.054	0.152	2.29e-54	0	CENPF	Retinal progenitor cells
NSG1	3.3e-140	-1.04575	0.09	0.283	8.5e-136	0	NSG1	Retinal progenitor cells
RP1	2.91e-112	-1.04673	0.04	0.19	7.51e-108	0	RP1	Retinal progenitor cells
CRX	9.93e-183	-1.04749	0.039	0.253	2.56e-178	0	CRX	Retinal progenitor cells
TFAP2A	2.54e-79	-1.05272	0.08	0.209	6.54e-75	0	TFAP2A	Retinal progenitor cells
FAM57B	8.4e-285	-1.05456	0.072	0.384	2.16e-280	0	FAM57B	Retinal progenitor cells
LINC00599	1.54e-255	-1.08808	0.074	0.364	3.96e-251	0	LINC00599	Retinal progenitor cells
SYP	6.16e-279	-1.10386	0.093	0.407	1.59e-274	0	SYP	Retinal progenitor cells
TOP2A	1.18e-81	-1.11424	0.044	0.164	3.03e-77	0	TOP2A	Retinal progenitor cells
CADPS	2.51e-255	-1.12601	0.063	0.35	6.48e-251	0	CADPS	Retinal progenitor cells
TUBB4B	7.5e-239	-1.1316	0.461	0.7	1.93e-234	0	TUBB4B	Retinal progenitor cells
INA	3.96e-237	-1.15236	0.085	0.359	1.02e-232	0	INA	Retinal progenitor cells
TMSB10	0	-1.16217	0.923	0.979	0	0	TMSB10	Retinal progenitor cells
GAP43	4.61e-82	-1.17727	0.118	0.259	1.19e-77	0	GAP43	Retinal progenitor cells
NR2E3	3.75e-137	-1.20904	0.029	0.196	9.65e-133	0	NR2E3	Retinal progenitor cells
MT-ND5	0	-1.22641	0.319	0.735	0	0	MT-ND5	Retinal progenitor cells
PRPH	1.46e-41	-1.27849	0.049	0.121	3.76e-37	0	PRPH	Retinal progenitor cells
ATP1A3	0	-1.28378	0.057	0.43	0	0	ATP1A3	Retinal progenitor cells
MLLT11	9.82e-290	-1.28676	0.232	0.551	2.53e-285	0	MLLT11	Retinal progenitor cells
DCT	1.36e-112	-1.3007	0.032	0.177	3.5e-108	0	DCT	Retinal progenitor cells
HIST1H4C	1.1e-74	-1.30877	0.469	0.64	2.82e-70	0	HIST1H4C	Retinal progenitor cells
AL451062.1	1.1e-125	-1.31452	0.067	0.236	2.84e-121	0	AL451062.1	Retinal progenitor cells
CPE	0	-1.33958	0.213	0.584	0	0	CPE	Retinal progenitor cells
CRABP2	5.27e-178	-1.37617	0.066	0.285	1.36e-173	0	CRABP2	Retinal progenitor cells
GADD45G	1.19e-247	-1.4074	0.189	0.481	3.06e-243	0	GADD45G	Retinal progenitor cells
MT-CO2	0	-1.43886	0.751	0.964	0	0	MT-CO2	Retinal progenitor cells
ROM1	2.6e-159	-1.44653	0.061	0.259	6.69e-155	0	ROM1	Retinal progenitor cells
MT-CO1	0	-1.44775	0.79	0.975	0	0	MT-CO1	Retinal progenitor cells
RTN1	1.85e-197	-1.45447	0.145	0.388	4.76e-193	0	RTN1	Retinal progenitor cells
MT-CO3	0	-1.45783	0.822	0.98	0	0	MT-CO3	Retinal progenitor cells
MT-ND2	0	-1.46271	0.422	0.863	0	0	MT-ND2	Retinal progenitor cells
CD24	1.26e-297	-1.46832	0.208	0.518	3.24e-293	0	CD24	Retinal progenitor cells
MT-ND1	0	-1.48763	0.559	0.914	0	0	MT-ND1	Retinal progenitor cells
MT-CYB	0	-1.49529	0.702	0.95	0	0	MT-CYB	Retinal progenitor cells
MT-ATP6	0	-1.52693	0.809	0.97	0	0	MT-ATP6	Retinal progenitor cells
PCBP4	0	-1.53486	0.207	0.56	0	0	PCBP4	Retinal progenitor cells
MT-ND3	0	-1.54016	0.654	0.934	0	0	MT-ND3	Retinal progenitor cells
MT-ND4	0	-1.55609	0.715	0.964	0	0	MT-ND4	Retinal progenitor cells
PDC	1.21e-132	-1.69374	0.104	0.282	3.11e-128	0	PDC	Retinal progenitor cells
OTX2	9.05e-243	-1.75653	0.131	0.393	2.33e-238	0	OTX2	Retinal progenitor cells
NEUROD4	7.43e-288	-1.84121	0.074	0.371	1.92e-283	0	NEUROD4	Retinal progenitor cells
GNB3	3.86e-214	-1.93072	0.125	0.37	9.95e-210	0	GNB3	Retinal progenitor cells
AIPL1	4.92e-182	-1.99071	0.099	0.318	1.27e-177	0	AIPL1	Retinal progenitor cells
STMN2	1.12e-256	-2.08684	0.384	0.648	2.87e-252	0	STMN2	Retinal progenitor cells
NEUROD1	0	-2.12953	0.126	0.447	0	0	NEUROD1	Retinal progenitor cells
NRL	5.47e-154	-2.37673	0.217	0.418	1.41e-149	0	NRL	Retinal progenitor cells
RCVRN	4.07e-129	-2.58108	0.265	0.437	1.05e-124	0	RCVRN	Retinal progenitor cells
SAT1.1	0	2.29264	0.898	0.443	0	1	SAT1	Muller glia
TF.1	0	2.1543	0.768	0.264	0	1	TF	Muller glia
C1orf61.1	0	1.98278	0.695	0.209	0	1	C1orf61	Muller glia
WIF1.1	0	1.7393	0.398	0.092	0	1	WIF1	Muller glia
CYR61	0	1.70329	0.804	0.29	0	1	CYR61	Muller glia
SFRP2.1	0	1.67589	0.899	0.387	0	1	SFRP2	Muller glia
PRSS35.1	0	1.64116	0.668	0.19	0	1	PRSS35	Muller glia
FOS	0	1.6061	0.934	0.691	0	1	FOS	Muller glia
SOX2.1	0	1.58361	0.989	0.532	0	1	SOX2	Muller glia
GAS1.1	0	1.5815	0.701	0.232	0	1	GAS1	Muller glia
VIM.1	0	1.55774	1	0.806	0	1	VIM	Muller glia
HES5.1	0	1.49978	0.777	0.351	0	1	HES5	Muller glia
HES1.1	0	1.48928	0.927	0.436	0	1	HES1	Muller glia
CLU.1	0	1.44794	0.955	0.556	0	1	CLU	Muller glia
SLC1A3.1	0	1.43933	0.644	0.197	0	1	SLC1A3	Muller glia
RLBP1.1	0	1.42634	0.558	0.108	0	1	RLBP1	Muller glia
PLP1.1	0	1.4142	0.724	0.203	0	1	PLP1	Muller glia
MCAM	0	1.40989	0.616	0.167	0	1	MCAM	Muller glia
TTYH1.1	0	1.36828	0.96	0.49	0	1	TTYH1	Muller glia
ZFP36L1.1	0	1.3659	0.934	0.429	0	1	ZFP36L1	Muller glia
HES4.1	0	1.33127	0.884	0.476	0	1	HES4	Muller glia
LUM.1	0	1.31993	0.463	0.1	0	1	LUM	Muller glia
LINC00461.1	0	1.30458	0.842	0.424	0	1	LINC00461	Muller glia
SPP1.1	0	1.28259	0.965	0.519	0	1	SPP1	Muller glia
SOX9.1	0	1.26267	0.849	0.375	0	1	SOX9	Muller glia
KDR.1	0	1.24576	0.62	0.173	0	1	KDR	Muller glia
GPM6B.1	0	1.24465	0.918	0.541	0	1	GPM6B	Muller glia
DKK3.1	0	1.22984	0.911	0.526	0	1	DKK3	Muller glia
RASD1	5.7e-59	1.21816	0.384	0.283	1.47e-54	1	RASD1	Muller glia
JUN.1	0	1.20309	0.966	0.781	0	1	JUN	Muller glia
GATB.1	0	1.18052	0.713	0.284	0	1	GATB	Muller glia
EGR1	0	1.17989	0.632	0.281	0	1	EGR1	Muller glia
QDPR.1	0	1.16774	0.753	0.364	0	1	QDPR	Muller glia
ZFP36L2.1	0	1.15332	0.966	0.592	0	1	ZFP36L2	Muller glia
ID3	7.46e-254	1.1494	0.588	0.319	1.92e-249	1	ID3	Muller glia
ID4	0	1.13515	0.754	0.367	0	1	ID4	Muller glia
NES.1	0	1.11887	0.672	0.277	0	1	NES	Muller glia
CA14.1	0	1.11288	0.603	0.192	0	1	CA14	Muller glia
ID1	0	1.10127	0.824	0.463	0	1	ID1	Muller glia
CMTM6.1	0	1.08937	0.749	0.362	0	1	CMTM6	Muller glia
DUSP1	8.25e-278	1.06021	0.863	0.637	2.13e-273	1	DUSP1	Muller glia
TRPM3.1	0	1.05639	0.581	0.198	0	1	TRPM3	Muller glia
DDHD1.1	0	1.0442	0.7	0.338	0	1	DDHD1	Muller glia
CCND1.1	0	1.03597	0.957	0.535	0	1	CCND1	Muller glia
NR4A1	0	1.03588	0.421	0.15	0	1	NR4A1	Muller glia
BTG2	1.18e-261	1.03221	0.698	0.435	3.05e-257	1	BTG2	Muller glia
METRN.1	0	1.01488	0.657	0.322	0	1	METRN	Muller glia
ID2	6.38e-283	1.00023	0.633	0.346	1.64e-278	1	ID2	Muller glia
MYO10.1	0	0.965512	0.692	0.306	0	1	MYO10	Muller glia
FOSB	1.14e-268	0.955097	0.574	0.292	2.93e-264	1	FOSB	Muller glia
TCF4.1	0	0.952639	0.867	0.572	0	1	TCF4	Muller glia
AL139246.5	0	0.943066	0.577	0.22	0	1	AL139246.5	Muller glia
ASPH	2.34e-292	0.933056	0.57	0.296	6.04e-288	1	ASPH	Muller glia
SPRY2.1	0	0.926022	0.563	0.246	0	1	SPRY2	Muller glia
SFRP1	0	0.924356	0.449	0.162	0	1	SFRP1	Muller glia
CREB5	0	0.91993	0.522	0.193	0	1	CREB5	Muller glia
BAMBI	0	0.918266	0.573	0.268	0	1	BAMBI	Muller glia
PMEPA1.1	0	0.910921	0.819	0.51	0	1	PMEPA1	Muller glia
MPZ	0	0.900669	0.3	0.047	0	1	MPZ	Muller glia
IER2	1.12e-222	0.898891	0.814	0.599	2.87e-218	1	IER2	Muller glia
FAM69C.1	0	0.898239	0.48	0.148	0	1	FAM69C	Muller glia
MTTP	0	0.893219	0.254	0.044	0	1	MTTP	Muller glia
GABRG3	0	0.88842	0.357	0.086	0	1	GABRG3	Muller glia
RTN4.1	0	0.883606	0.999	0.887	0	1	RTN4	Muller glia
IRX5	0	0.883114	0.39	0.114	0	1	IRX5	Muller glia
SELENOP.1	0	0.878167	0.731	0.371	0	1	SELENOP	Muller glia
SOX8.1	0	0.854463	0.381	0.115	0	1	SOX8	Muller glia
CNN3	0	0.854095	0.82	0.511	0	1	CNN3	Muller glia
BTG1.1	0	0.853869	0.992	0.907	0	1	BTG1	Muller glia
MEST	0	0.853005	0.841	0.527	0	1	MEST	Muller glia
STON2.1	0	0.851979	0.635	0.314	0	1	STON2	Muller glia
CXCR4	1.23e-271	0.850273	0.647	0.349	3.18e-267	1	CXCR4	Muller glia
COL2A1.1	0	0.847326	0.518	0.195	0	1	COL2A1	Muller glia
LGR4.1	0	0.846212	0.727	0.394	0	1	LGR4	Muller glia
ILDR2.1	0	0.834116	0.586	0.274	0	1	ILDR2	Muller glia
KIAA1147	0	0.833352	0.474	0.189	0	1	KIAA1147	Muller glia
LIMCH1.1	0	0.83302	0.579	0.243	0	1	LIMCH1	Muller glia
SLITRK2	1.79e-288	0.827036	0.417	0.166	4.61e-284	1	SLITRK2	Muller glia
LAMP5	0	0.823242	0.356	0.09	0	1	LAMP5	Muller glia
FLT1	0	0.813308	0.276	0.059	0	1	FLT1	Muller glia
F3	0	0.802291	0.286	0.061	0	1	F3	Muller glia
JUND	4.32e-181	0.802159	0.891	0.798	1.11e-176	1	JUND	Muller glia
CRYM	0	0.79464	0.353	0.113	0	1	CRYM	Muller glia
ST5	1.03e-261	0.789991	0.495	0.233	2.66e-257	1	ST5	Muller glia
FBXW7.1	0	0.782466	0.737	0.417	0	1	FBXW7	Muller glia
PYGL	0	0.78239	0.432	0.137	0	1	PYGL	Muller glia
AC009041.2.1	0	0.777044	0.439	0.154	0	1	AC009041.2	Muller glia
EPHX2	0	0.767889	0.437	0.164	0	1	EPHX2	Muller glia
NPVF	1.75e-248	0.765871	0.118	0.019	4.51e-244	1	NPVF	Muller glia
TOX3.1	1.18e-231	0.758893	0.652	0.391	3.03e-227	1	TOX3	Muller glia
REST.1	0	0.753142	0.517	0.222	0	1	REST	Muller glia
SPON1	0	0.746496	0.418	0.144	0	1	SPON1	Muller glia
RASSF4	2.6e-277	0.739512	0.506	0.233	6.69e-273	1	RASSF4	Muller glia
CRB1.1	9.52e-275	0.736674	0.571	0.281	2.45e-270	1	CRB1	Muller glia
RDH10	4.13e-245	0.725395	0.367	0.144	1.06e-240	1	RDH10	Muller glia
FAM184B.1	2.77e-270	0.720075	0.487	0.217	7.13e-266	1	FAM184B	Muller glia
MGARP	6.81e-299	0.719175	0.851	0.598	1.76e-294	1	MGARP	Muller glia
TMEM37	1.71e-288	0.717814	0.421	0.162	4.41e-284	1	TMEM37	Muller glia
DBI	4.41e-170	0.700752	0.775	0.568	1.14e-165	1	DBI	Muller glia
ATP6V0B.1	3e-130	-0.707567	0.423	0.6	7.72e-126	1	ATP6V0B	Muller glia
DLL3	2.18e-107	-0.713738	0.055	0.231	5.63e-103	1	DLL3	Muller glia
PTTG1	2.65e-29	-0.71867	0.09	0.165	6.83e-25	1	PTTG1	Muller glia
SYT4.1	4.3e-96	-0.722053	0.062	0.225	1.11e-91	1	SYT4	Muller glia
FSTL5.1	1.2e-81	-0.73229	0.08	0.228	3.08e-77	1	FSTL5	Muller glia
TUBB2B.1	4.76e-53	-0.732468	0.95	0.918	1.23e-48	1	TUBB2B	Muller glia
SLC38A5.1	5.94e-104	-0.735707	0.019	0.174	1.53e-99	1	SLC38A5	Muller glia
PCP4	5.43e-24	-0.736569	0.077	0.142	1.4e-19	1	PCP4	Muller glia
CCNG2.1	7.33e-102	-0.738018	0.22	0.409	1.89e-97	1	CCNG2	Muller glia
SLC1A7.1	1.57e-107	-0.738529	0.029	0.19	4.04e-103	1	SLC1A7	Muller glia
IMPG2.1	1.06e-94	-0.74918	0.023	0.167	2.72e-90	1	IMPG2	Muller glia
NEFM.1	1.38e-31	-0.75724	0.092	0.171	3.55e-27	1	NEFM	Muller glia
CHGB.1	5.63e-165	-0.758125	0.029	0.257	1.45e-160	1	CHGB	Muller glia
MAPT.1	1.54e-116	-0.763302	0.044	0.223	3.96e-112	1	MAPT	Muller glia
BTBD8	8.36e-73	-0.765045	0.132	0.276	2.15e-68	1	BTBD8	Muller glia
RND3	7.35e-45	-0.767669	0.163	0.277	1.89e-40	1	RND3	Muller glia
DCX	6.47e-108	-0.77246	0.05	0.22	1.67e-103	1	DCX	Muller glia
ISL1.1	3.6e-56	-0.773953	0.025	0.12	9.27e-52	1	ISL1	Muller glia
OLFM1.1	2.11e-74	-0.776093	0.058	0.192	5.44e-70	1	OLFM1	Muller glia
SCG5.1	1.25e-78	-0.776673	0.136	0.285	3.22e-74	1	SCG5	Muller glia
ELAVL4.1	2.27e-75	-0.781866	0.03	0.152	5.86e-71	1	ELAVL4	Muller glia
PODXL2.1	8.63e-137	-0.78203	0.172	0.394	2.22e-132	1	PODXL2	Muller glia
NEFL	1.01e-28	-0.79471	0.113	0.19	2.59e-24	1	NEFL	Muller glia
NUSAP1	1.01e-54	-0.802581	0.047	0.149	2.59e-50	1	NUSAP1	Muller glia
CXXC5	3.85e-147	-0.825516	0.469	0.641	9.92e-143	1	CXXC5	Muller glia
STMN1	0	-0.830736	0.977	0.979	0	1	STMN1	Muller glia
AMER2.1	1.64e-54	-0.833061	0.435	0.534	4.22e-50	1	AMER2	Muller glia
C4orf48.1	6e-74	-0.840301	0.289	0.427	1.54e-69	1	C4orf48	Muller glia
TULP1.1	3.39e-111	-0.84558	0.031	0.197	8.75e-107	1	TULP1	Muller glia
GNG3.1	3.74e-113	-0.846392	0.058	0.235	9.65e-109	1	GNG3	Muller glia
ZFHX3	4.75e-101	-0.846708	0.071	0.242	1.22e-96	1	ZFHX3	Muller glia
NRXN1.1	1.55e-134	-0.847398	0.059	0.266	4e-130	1	NRXN1	Muller glia
UBE2C.1	2.83e-52	-0.849884	0.032	0.126	7.29e-48	1	UBE2C	Muller glia
RXRG.1	6.62e-127	-0.854389	0.034	0.222	1.71e-122	1	RXRG	Muller glia
INSM1	1.68e-145	-0.85444	0.066	0.285	4.32e-141	1	INSM1	Muller glia
KIF5C	3.72e-106	-0.856548	0.151	0.335	9.59e-102	1	KIF5C	Muller glia
ELAVL3.1	4.66e-129	-0.868726	0.088	0.291	1.2e-124	1	ELAVL3	Muller glia
RAX2.1	7.4e-88	-0.889053	0.038	0.18	1.91e-83	1	RAX2	Muller glia
PKM.1	1.63e-199	-0.893345	0.684	0.795	4.2e-195	1	PKM	Muller glia
MIR124-2HG.1	1.32e-160	-0.908274	0.078	0.315	3.4e-156	1	MIR124-2HG	Muller glia
SRRM4.1	7.32e-176	-0.912	0.088	0.345	1.89e-171	1	SRRM4	Muller glia
TUBB2A.1	5.93e-51	-0.919003	0.441	0.53	1.53e-46	1	TUBB2A	Muller glia
RUNX1T1.1	6.36e-137	-0.921633	0.027	0.223	1.64e-132	1	RUNX1T1	Muller glia
CHRNA3.1	9.48e-175	-0.927574	0.023	0.257	2.44e-170	1	CHRNA3	Muller glia
LOXL1.1	5.1e-110	-0.933255	0.1	0.281	1.31e-105	1	LOXL1	Muller glia
BASP1.1	1.05e-99	-0.941603	0.682	0.734	2.71e-95	1	BASP1	Muller glia
UNC119.1	8.39e-105	-0.946218	0.146	0.329	2.16e-100	1	UNC119	Muller glia
LMO4.1	4.71e-43	-0.950287	0.269	0.383	1.21e-38	1	LMO4	Muller glia
PTMS.1	2.82e-301	-0.958213	0.8	0.873	7.27e-297	1	PTMS	Muller glia
ENO2.1	6.04e-175	-0.958762	0.173	0.427	1.55e-170	1	ENO2	Muller glia
CRMP1.1	2.05e-131	-0.96633	0.32	0.516	5.27e-127	1	CRMP1	Muller glia
NSG2.1	1.33e-157	-0.979211	0.05	0.276	3.42e-153	1	NSG2	Muller glia
NREP.1	3.01e-205	-0.980827	0.492	0.687	7.76e-201	1	NREP	Muller glia
ONECUT2.1	1.69e-88	-0.992856	0.03	0.171	4.34e-84	1	ONECUT2	Muller glia
SAMD11.1	3.61e-136	-0.998273	0.097	0.309	9.29e-132	1	SAMD11	Muller glia
STMN4.1	6.84e-97	-0.999407	0.156	0.326	1.76e-92	1	STMN4	Muller glia
SCG3.1	6.15e-238	-1.01493	0.128	0.444	1.58e-233	1	SCG3	Muller glia
APLP1.1	9.3e-215	-1.02439	0.069	0.352	2.4e-210	1	APLP1	Muller glia
FAM161A.1	1.85e-120	-1.02538	0.189	0.386	4.77e-116	1	FAM161A	Muller glia
ATOH7.1	3.7e-39	-1.02886	0.028	0.102	9.53e-35	1	ATOH7	Muller glia
TUBB.1	5.5e-258	-1.03942	0.871	0.912	1.42e-253	1	TUBB	Muller glia
TFAP2B.1	7.28e-80	-1.04786	0.046	0.179	1.88e-75	1	TFAP2B	Muller glia
PRDM1.1	6.47e-128	-1.0602	0.023	0.205	1.67e-123	1	PRDM1	Muller glia
TUBA1B	3.07e-167	-1.0642	0.749	0.827	7.92e-163	1	TUBA1B	Muller glia
CENPF.1	2.38e-44	-1.08261	0.059	0.15	6.13e-40	1	CENPF	Muller glia
RP1.1	3.6e-87	-1.08711	0.045	0.187	9.26e-83	1	RP1	Muller glia
CELF4.1	1.2e-167	-1.09044	0.056	0.295	3.09e-163	1	CELF4	Muller glia
PCSK1N.1	6.6e-138	-1.09085	0.211	0.424	1.7e-133	1	PCSK1N	Muller glia
UCHL1.1	1.1e-113	-1.09248	0.284	0.469	2.83e-109	1	UCHL1	Muller glia
JPT1.1	8.45e-158	-1.09376	0.427	0.596	2.18e-153	1	JPT1	Muller glia
CRX.1	1.61e-146	-1.09922	0.042	0.25	4.16e-142	1	CRX	Muller glia
SNAP25.1	2.09e-234	-1.09931	0.071	0.377	5.38e-230	1	SNAP25	Muller glia
NTM.1	7.52e-140	-1.10799	0.127	0.344	1.94e-135	1	NTM	Muller glia
SEZ6L2.1	1.62e-262	-1.13554	0.032	0.35	4.16e-258	1	SEZ6L2	Muller glia
FAM57B.1	6.95e-248	-1.16045	0.068	0.38	1.79e-243	1	FAM57B	Muller glia
TOP2A.1	1.03e-62	-1.16169	0.049	0.162	2.64e-58	1	TOP2A	Muller glia
LINC00599.1	4.13e-211	-1.16308	0.076	0.359	1.06e-206	1	LINC00599	Muller glia
HES6	2.95e-144	-1.16399	0.324	0.543	7.6e-140	1	HES6	Muller glia
TFAP2A.1	9.93e-73	-1.17179	0.074	0.208	2.56e-68	1	TFAP2A	Muller glia
SYP.1	5.39e-231	-1.18931	0.099	0.402	1.39e-226	1	SYP	Muller glia
NSG1.1	1.38e-123	-1.18934	0.088	0.28	3.57e-119	1	NSG1	Muller glia
MEIS2.1	3.42e-54	-1.19128	0.258	0.38	8.8e-50	1	MEIS2	Muller glia
SNCG.1	5.31e-56	-1.21684	0.099	0.212	1.37e-51	1	SNCG	Muller glia
CADPS.1	3.92e-214	-1.21945	0.063	0.346	1.01e-209	1	CADPS	Muller glia
INA.1	1.19e-185	-1.22577	0.098	0.354	3.06e-181	1	INA	Muller glia
TUBB4B.1	1.33e-212	-1.24741	0.533	0.692	3.42e-208	1	TUBB4B	Muller glia
TAGLN3.1	9.51e-209	-1.25587	0.218	0.488	2.45e-204	1	TAGLN3	Muller glia
NR2E3.1	1.65e-111	-1.25846	0.029	0.194	4.26e-107	1	NR2E3	Muller glia
PRPH.1	8.2e-31	-1.31374	0.053	0.12	2.11e-26	1	PRPH	Muller glia
GAP43.1	3.27e-66	-1.33309	0.128	0.256	8.43e-62	1	GAP43	Muller glia
DCT.1	3.78e-96	-1.35703	0.028	0.175	9.75e-92	1	DCT	Muller glia
HIST1H4C.1	2.59e-51	-1.36666	0.542	0.633	6.68e-47	1	HIST1H4C	Muller glia
TMSB10.1	0	-1.37404	0.941	0.977	0	1	TMSB10	Muller glia
ATP1A3.1	0	-1.37606	0.053	0.425	0	1	ATP1A3	Muller glia
MLLT11.1	9.88e-247	-1.44842	0.26	0.544	2.55e-242	1	MLLT11	Muller glia
CRABP2.1	1.84e-139	-1.45528	0.074	0.281	4.73e-135	1	CRABP2	Muller glia
AL451062.1.1	8.81e-117	-1.46668	0.056	0.234	2.27e-112	1	AL451062.1	Muller glia
ROM1.1	2.4e-131	-1.52652	0.062	0.256	6.17e-127	1	ROM1	Muller glia
CPE.1	0	-1.55293	0.225	0.578	0	1	CPE	Muller glia
RTN1.1	5.53e-166	-1.60734	0.152	0.384	1.43e-161	1	RTN1	Muller glia
GADD45G.1	2.09e-216	-1.60897	0.2	0.476	5.39e-212	1	GADD45G	Muller glia
PCBP4.1	0	-1.70544	0.234	0.553	0	1	PCBP4	Muller glia
CD24.1	6.21e-295	-1.75251	0.191	0.514	1.6e-290	1	CD24	Muller glia
PDC.1	6.33e-118	-1.83926	0.097	0.28	1.63e-113	1	PDC	Muller glia
OTX2.1	1.18e-211	-1.91526	0.125	0.389	3.03e-207	1	OTX2	Muller glia
NEUROD4.1	2.97e-236	-1.9232	0.074	0.367	7.65e-232	1	NEUROD4	Muller glia
GNB3.1	3.76e-169	-2.04101	0.135	0.366	9.7e-165	1	GNB3	Muller glia
AIPL1.1	2.96e-138	-2.08323	0.113	0.313	7.62e-134	1	AIPL1	Muller glia
NEUROD1.1	1.74e-280	-2.32219	0.12	0.443	4.49e-276	1	NEUROD1	Muller glia
NRL.1	1.47e-126	-2.53827	0.231	0.414	3.79e-122	1	NRL	Muller glia
STMN2.1	1.22e-282	-2.57704	0.39	0.643	3.15e-278	1	STMN2	Muller glia
RCVRN.1	3.65e-118	-2.87471	0.272	0.434	9.39e-114	1	RCVRN	Muller glia
HES1.2	0	1.5748	0.918	0.44	0	2	HES1	Retinal progenitor cells
CYR61.1	0	1.4638	0.753	0.296	0	2	CYR61	Retinal progenitor cells
FOS.1	0	1.46208	0.915	0.694	0	2	FOS	Retinal progenitor cells
HES5.2	0	1.39136	0.728	0.357	0	2	HES5	Retinal progenitor cells
EGR1.1	0	1.35113	0.61	0.284	0	2	EGR1	Retinal progenitor cells
ZFP36L1.2	0	1.28766	0.912	0.434	0	2	ZFP36L1	Retinal progenitor cells
VIM.2	0	1.24986	1	0.807	0	2	VIM	Retinal progenitor cells
CCND1.2	0	1.24857	0.957	0.538	0	2	CCND1	Retinal progenitor cells
ID3.1	5.96e-277	1.23763	0.606	0.32	1.54e-272	2	ID3	Retinal progenitor cells
TF.2	0	1.2202	0.661	0.273	0	2	TF	Retinal progenitor cells
ZFP36L2.2	0	1.20576	0.961	0.595	0	2	ZFP36L2	Retinal progenitor cells
SOX2.2	0	1.2028	0.955	0.537	0	2	SOX2	Retinal progenitor cells
TTYH1.2	0	1.18416	0.933	0.495	0	2	TTYH1	Retinal progenitor cells
SPP1.2	0	1.17289	0.949	0.523	0	2	SPP1	Retinal progenitor cells
SAT1.2	3.18e-284	1.16115	0.724	0.455	8.2e-280	2	SAT1	Retinal progenitor cells
AL139246.5.1	0	1.134	0.544	0.225	0	2	AL139246.5	Retinal progenitor cells
SFRP2.2	0	1.11866	0.834	0.394	0	2	SFRP2	Retinal progenitor cells
HES4.2	0	1.06623	0.828	0.482	0	2	HES4	Retinal progenitor cells
PRSS35.2	0	1.04064	0.539	0.201	0	2	PRSS35	Retinal progenitor cells
BAMBI.1	0	1.01512	0.588	0.27	0	2	BAMBI	Retinal progenitor cells
ID1.1	0	0.996765	0.787	0.467	0	2	ID1	Retinal progenitor cells
PLP1.2	0	0.991593	0.569	0.215	0	2	PLP1	Retinal progenitor cells
JUN.2	0	0.985851	0.952	0.783	0	2	JUN	Retinal progenitor cells
SOX9.2	0	0.960894	0.766	0.383	0	2	SOX9	Retinal progenitor cells
PMEPA1.2	0	0.940371	0.807	0.513	0	2	PMEPA1	Retinal progenitor cells
CLU.2	0	0.932529	0.912	0.561	0	2	CLU	Retinal progenitor cells
GAS1.2	6.82e-260	0.931715	0.524	0.245	1.76e-255	2	GAS1	Retinal progenitor cells
JUNB	7.32e-120	0.903608	0.609	0.449	1.89e-115	2	JUNB	Retinal progenitor cells
ID4.1	6.35e-261	0.898859	0.651	0.376	1.64e-256	2	ID4	Retinal progenitor cells
DAPL1	1.05e-281	0.886673	0.747	0.455	2.7e-277	2	DAPL1	Retinal progenitor cells
QDPR.2	5.52e-219	0.88507	0.624	0.374	1.42e-214	2	QDPR	Retinal progenitor cells
BTG2.1	5.93e-125	0.882883	0.61	0.442	1.53e-120	2	BTG2	Retinal progenitor cells
IER2.1	2.33e-215	0.871693	0.799	0.601	6e-211	2	IER2	Retinal progenitor cells
GPM6B.2	0	0.867647	0.834	0.548	0	2	GPM6B	Retinal progenitor cells
FOSB.1	6.78e-200	0.85872	0.542	0.296	1.75e-195	2	FOSB	Retinal progenitor cells
MYO10.2	3.3e-279	0.858341	0.614	0.313	8.5e-275	2	MYO10	Retinal progenitor cells
DKK3.2	0	0.84984	0.836	0.533	0	2	DKK3	Retinal progenitor cells
MEST.1	2.69e-305	0.847481	0.824	0.53	6.93e-301	2	MEST	Retinal progenitor cells
MCAM.1	3.68e-211	0.838399	0.413	0.181	9.47e-207	2	MCAM	Retinal progenitor cells
LINC00461.2	7.39e-287	0.828121	0.755	0.432	1.9e-282	2	LINC00461	Retinal progenitor cells
FXYD1.1	1.56e-243	0.823782	0.645	0.37	4.01e-239	2	FXYD1	Retinal progenitor cells
GATB.2	1.13e-242	0.813533	0.573	0.295	2.92e-238	2	GATB	Retinal progenitor cells
NR4A1.1	2.91e-165	0.796477	0.347	0.156	7.51e-161	2	NR4A1	Retinal progenitor cells
JUND.1	1.06e-180	0.794732	0.91	0.798	2.74e-176	2	JUND	Retinal progenitor cells
SLC1A3.2	4.78e-256	0.792179	0.484	0.209	1.23e-251	2	SLC1A3	Retinal progenitor cells
MYB.1	1.58e-260	0.7854	0.564	0.27	4.07e-256	2	MYB	Retinal progenitor cells
ASCL1.1	8.6e-260	0.782755	0.734	0.408	2.22e-255	2	ASCL1	Retinal progenitor cells
C1orf61.2	1.9e-148	0.765733	0.436	0.226	4.91e-144	2	C1orf61	Retinal progenitor cells
DUSP1.1	9.47e-143	0.764494	0.797	0.642	2.44e-138	2	DUSP1	Retinal progenitor cells
KDR.2	8.4e-263	0.761385	0.457	0.185	2.16e-258	2	KDR	Retinal progenitor cells
RLBP1.2	3.38e-246	0.74305	0.35	0.122	8.72e-242	2	RLBP1	Retinal progenitor cells
METRN.2	2.42e-183	0.737156	0.569	0.329	6.22e-179	2	METRN	Retinal progenitor cells
SELENOP.2	3.35e-206	0.735414	0.65	0.378	8.62e-202	2	SELENOP	Retinal progenitor cells
MT-CO2.1	0	0.732729	0.996	0.946	0	2	MT-CO2	Retinal progenitor cells
MT-CO3.1	0	0.730558	0.998	0.967	0	2	MT-CO3	Retinal progenitor cells
LIMCH1.2	2.61e-194	0.729663	0.491	0.25	6.72e-190	2	LIMCH1	Retinal progenitor cells
CA14.2	2.72e-207	0.725524	0.443	0.203	7e-203	2	CA14	Retinal progenitor cells
SMIM20	2.28e-178	0.719327	0.587	0.365	5.87e-174	2	SMIM20	Retinal progenitor cells
MT-CO1.1	0	0.70383	0.995	0.959	0	2	MT-CO1	Retinal progenitor cells
MT-CYB.1	5.9e-286	0.701154	0.99	0.929	1.52e-281	2	MT-CYB	Retinal progenitor cells
FABP7	3.35e-17	-0.701339	0.76	0.63	8.62e-13	2	FABP7	Retinal progenitor cells
GUK1.1	4.66e-96	-0.704214	0.331	0.534	1.2e-91	2	GUK1	Retinal progenitor cells
TTC3	7.93e-143	-0.705741	0.595	0.756	2.04e-138	2	TTC3	Retinal progenitor cells
SLC38A5.2	3.39e-87	-0.709729	0.023	0.173	8.74e-83	2	SLC38A5	Retinal progenitor cells
DCX.1	2.84e-86	-0.713644	0.058	0.219	7.32e-82	2	DCX	Retinal progenitor cells
NEFL.1	6.93e-20	-0.719828	0.121	0.19	1.79e-15	2	NEFL	Retinal progenitor cells
CXXC5.1	1.27e-110	-0.724871	0.451	0.641	3.26e-106	2	CXXC5	Retinal progenitor cells
KIF5C.1	3.52e-78	-0.727845	0.159	0.333	9.07e-74	2	KIF5C	Retinal progenitor cells
OLFM1.2	8.66e-62	-0.728091	0.061	0.19	2.23e-57	2	OLFM1	Retinal progenitor cells
IMPG2.2	9.66e-84	-0.730515	0.022	0.166	2.49e-79	2	IMPG2	Retinal progenitor cells
SLC1A7.2	3.67e-100	-0.734142	0.023	0.19	9.45e-96	2	SLC1A7	Retinal progenitor cells
ELAVL4.2	2.4e-59	-0.738223	0.036	0.151	6.19e-55	2	ELAVL4	Retinal progenitor cells
BTBD8.1	1.5e-76	-0.747639	0.112	0.276	3.87e-72	2	BTBD8	Retinal progenitor cells
NEFM.2	3.79e-33	-0.75094	0.082	0.171	9.76e-29	2	NEFM	Retinal progenitor cells
PCP4.1	2.75e-25	-0.753681	0.07	0.142	7.09e-21	2	PCP4	Retinal progenitor cells
ISL1.2	5.99e-50	-0.754441	0.024	0.119	1.54e-45	2	ISL1	Retinal progenitor cells
MAPT.2	4.71e-107	-0.754869	0.039	0.222	1.21e-102	2	MAPT	Retinal progenitor cells
CHGB.2	1.23e-146	-0.756892	0.028	0.256	3.16e-142	2	CHGB	Retinal progenitor cells
C4orf48.2	3.45e-63	-0.765673	0.275	0.427	8.89e-59	2	C4orf48	Retinal progenitor cells
TUBB2B.2	1.23e-59	-0.769264	0.933	0.919	3.16e-55	2	TUBB2B	Retinal progenitor cells
RXRG.2	4.62e-94	-0.773203	0.049	0.22	1.19e-89	2	RXRG	Retinal progenitor cells
ATP1B2	5.98e-69	-0.778453	0.281	0.441	1.54e-64	2	ATP1B2	Retinal progenitor cells
ZFHX3.1	1.11e-77	-0.778487	0.081	0.24	2.86e-73	2	ZFHX3	Retinal progenitor cells
GNG3.2	4.12e-91	-0.779833	0.064	0.233	1.06e-86	2	GNG3	Retinal progenitor cells
ATP6V0B.2	4.6e-151	-0.780565	0.364	0.602	1.18e-146	2	ATP6V0B	Retinal progenitor cells
UBE2C.2	1.06e-35	-0.780814	0.043	0.125	2.72e-31	2	UBE2C	Retinal progenitor cells
INSM1.1	3.33e-121	-0.783703	0.068	0.283	8.58e-117	2	INSM1	Retinal progenitor cells
HIST1H1C	1.12e-60	-0.789223	0.205	0.354	2.89e-56	2	HIST1H1C	Retinal progenitor cells
SCG5.2	2.39e-84	-0.807969	0.115	0.285	6.15e-80	2	SCG5	Retinal progenitor cells
CADM2	4.7e-133	-0.810841	0.209	0.46	1.21e-128	2	CADM2	Retinal progenitor cells
NRXN1.2	4e-116	-0.817008	0.06	0.265	1.03e-111	2	NRXN1	Retinal progenitor cells
TUBB.2	9.32e-134	-0.827036	0.882	0.911	2.4e-129	2	TUBB	Retinal progenitor cells
TULP1.2	1.48e-98	-0.836994	0.03	0.196	3.8e-94	2	TULP1	Retinal progenitor cells
FAM161A.2	1.83e-80	-0.840351	0.204	0.383	4.72e-76	2	FAM161A	Retinal progenitor cells
PODXL2.2	4.39e-150	-0.841178	0.136	0.394	1.13e-145	2	PODXL2	Retinal progenitor cells
ELAVL3.2	1.05e-112	-0.844951	0.087	0.289	2.69e-108	2	ELAVL3	Retinal progenitor cells
SRRM4.2	1.03e-151	-0.852338	0.086	0.343	2.66e-147	2	SRRM4	Retinal progenitor cells
PKM.2	1.25e-164	-0.854672	0.667	0.795	3.21e-160	2	PKM	Retinal progenitor cells
CCNG2.2	1.53e-143	-0.865133	0.154	0.412	3.95e-139	2	CCNG2	Retinal progenitor cells
SOX4	4.91e-134	-0.866768	0.967	0.974	1.27e-129	2	SOX4	Retinal progenitor cells
LOXL1.2	3.52e-94	-0.871577	0.098	0.279	9.08e-90	2	LOXL1	Retinal progenitor cells
CHRNA3.2	4.37e-143	-0.878453	0.032	0.255	1.13e-138	2	CHRNA3	Retinal progenitor cells
MIR124-2HG.2	6.94e-145	-0.882874	0.072	0.314	1.79e-140	2	MIR124-2HG	Retinal progenitor cells
FSTL5.2	1.96e-122	-0.891785	0.031	0.229	5.05e-118	2	FSTL5	Retinal progenitor cells
RAX2.2	3.72e-81	-0.893038	0.035	0.179	9.57e-77	2	RAX2	Retinal progenitor cells
RUNX1T1.2	2.06e-124	-0.915625	0.024	0.222	5.3e-120	2	RUNX1T1	Retinal progenitor cells
LMO4.2	4.25e-43	-0.923016	0.251	0.383	1.09e-38	2	LMO4	Retinal progenitor cells
UNC119.2	1.13e-107	-0.93358	0.123	0.329	2.9e-103	2	UNC119	Retinal progenitor cells
SAMD11.2	2.42e-115	-0.934917	0.097	0.307	6.24e-111	2	SAMD11	Retinal progenitor cells
CENPF.2	1.31e-31	-0.949819	0.067	0.149	3.37e-27	2	CENPF	Retinal progenitor cells
TUBB2A.2	2.88e-60	-0.951474	0.398	0.532	7.42e-56	2	TUBB2A	Retinal progenitor cells
APLP1.2	9.36e-177	-0.956837	0.076	0.35	2.41e-172	2	APLP1	Retinal progenitor cells
ENO2.2	2.87e-166	-0.95763	0.152	0.426	7.39e-162	2	ENO2	Retinal progenitor cells
BASP1.2	1.3e-106	-0.960997	0.622	0.737	3.36e-102	2	BASP1	Retinal progenitor cells
SCG3.2	8.12e-197	-0.967791	0.134	0.441	2.09e-192	2	SCG3	Retinal progenitor cells
NREP.2	3.28e-190	-0.978366	0.465	0.687	8.45e-186	2	NREP	Retinal progenitor cells
NSG2.2	1.42e-146	-0.981173	0.043	0.275	3.65e-142	2	NSG2	Retinal progenitor cells
AMER2.2	2.43e-92	-0.983688	0.356	0.537	6.25e-88	2	AMER2	Retinal progenitor cells
PTMS.2	2.63e-291	-0.985189	0.743	0.876	6.76e-287	2	PTMS	Retinal progenitor cells
ONECUT2.2	1.02e-87	-0.988691	0.021	0.17	2.62e-83	2	ONECUT2	Retinal progenitor cells
UCHL1.2	1.17e-89	-0.990693	0.278	0.468	3.01e-85	2	UCHL1	Retinal progenitor cells
TFAP2B.2	4.73e-65	-0.994776	0.051	0.177	1.22e-60	2	TFAP2B	Retinal progenitor cells
PRDM1.2	1.35e-99	-1.01089	0.035	0.203	3.49e-95	2	PRDM1	Retinal progenitor cells
CRMP1.2	1.26e-143	-1.01217	0.278	0.517	3.24e-139	2	CRMP1	Retinal progenitor cells
ATOH7.2	1.1e-38	-1.01805	0.023	0.101	2.85e-34	2	ATOH7	Retinal progenitor cells
PCSK1N.2	1.19e-112	-1.02558	0.213	0.422	3.08e-108	2	PCSK1N	Retinal progenitor cells
CRX.2	5.04e-118	-1.04583	0.052	0.248	1.3e-113	2	CRX	Retinal progenitor cells
SNAP25.2	3.57e-192	-1.046	0.081	0.374	9.2e-188	2	SNAP25	Retinal progenitor cells
NTM.2	2.75e-130	-1.08416	0.114	0.343	7.08e-126	2	NTM	Retinal progenitor cells
TOP2A.2	1.29e-41	-1.08607	0.065	0.161	3.32e-37	2	TOP2A	Retinal progenitor cells
FAM57B.2	1.46e-202	-1.0918	0.077	0.377	3.76e-198	2	FAM57B	Retinal progenitor cells
SNCG.2	4.91e-36	-1.09219	0.115	0.21	1.27e-31	2	SNCG	Retinal progenitor cells
CELF4.2	1.3e-155	-1.09942	0.049	0.294	3.34e-151	2	CELF4	Retinal progenitor cells
STMN4.2	3.47e-118	-1.09956	0.117	0.327	8.94e-114	2	STMN4	Retinal progenitor cells
NSG1.2	9.27e-96	-1.1026	0.099	0.278	2.39e-91	2	NSG1	Retinal progenitor cells
SEZ6L2.2	1.58e-227	-1.10282	0.033	0.348	4.08e-223	2	SEZ6L2	Retinal progenitor cells
JPT1.2	6.05e-161	-1.10518	0.381	0.597	1.56e-156	2	JPT1	Retinal progenitor cells
RP1.2	7.68e-85	-1.10567	0.037	0.187	1.98e-80	2	RP1	Retinal progenitor cells
TMSB10.2	6.65e-269	-1.11943	0.968	0.975	1.71e-264	2	TMSB10	Retinal progenitor cells
TFAP2A.2	1.8e-65	-1.13322	0.072	0.207	4.64e-61	2	TFAP2A	Retinal progenitor cells
MEIS2.2	3.73e-57	-1.16357	0.234	0.38	9.61e-53	2	MEIS2	Retinal progenitor cells
TAGLN3.2	2.22e-168	-1.16639	0.222	0.485	5.72e-164	2	TAGLN3	Retinal progenitor cells
INA.2	3.01e-169	-1.17567	0.087	0.353	7.77e-165	2	INA	Retinal progenitor cells
SYP.2	2.02e-211	-1.18314	0.09	0.401	5.21e-207	2	SYP	Retinal progenitor cells
CADPS.2	1.74e-194	-1.20716	0.057	0.344	4.49e-190	2	CADPS	Retinal progenitor cells
HIST1H4C.2	7.61e-25	-1.20869	0.555	0.632	1.96e-20	2	HIST1H4C	Retinal progenitor cells
TUBB4B.2	3.87e-185	-1.20965	0.503	0.692	9.96e-181	2	TUBB4B	Retinal progenitor cells
LINC00599.2	7.7e-208	-1.21817	0.059	0.358	1.98e-203	2	LINC00599	Retinal progenitor cells
NR2E3.2	2.23e-91	-1.22339	0.036	0.192	5.74e-87	2	NR2E3	Retinal progenitor cells
PRPH.2	5.33e-24	-1.23197	0.056	0.119	1.37e-19	2	PRPH	Retinal progenitor cells
GAP43.2	1.2e-57	-1.26978	0.124	0.256	3.1e-53	2	GAP43	Retinal progenitor cells
ATP1A3.2	2.96e-264	-1.28256	0.07	0.421	7.63e-260	2	ATP1A3	Retinal progenitor cells
DCT.2	6.97e-85	-1.33001	0.028	0.174	1.8e-80	2	DCT	Retinal progenitor cells
CRABP2.2	7.57e-116	-1.37934	0.078	0.279	1.95e-111	2	CRABP2	Retinal progenitor cells
CPE.2	4.88e-262	-1.3879	0.253	0.574	1.26e-257	2	CPE	Retinal progenitor cells
AL451062.1.2	7.23e-98	-1.40718	0.061	0.233	1.86e-93	2	AL451062.1	Retinal progenitor cells
MLLT11.2	2.26e-221	-1.41887	0.242	0.543	5.81e-217	2	MLLT11	Retinal progenitor cells
ROM1.2	2.15e-104	-1.46653	0.073	0.254	5.53e-100	2	ROM1	Retinal progenitor cells
RTN1.2	3.95e-131	-1.51019	0.164	0.382	1.02e-126	2	RTN1	Retinal progenitor cells
GADD45G.2	1.38e-178	-1.52074	0.204	0.474	3.54e-174	2	GADD45G	Retinal progenitor cells
PCBP4.2	1.35e-263	-1.61904	0.231	0.551	3.49e-259	2	PCBP4	Retinal progenitor cells
CD24.2	6.59e-246	-1.66099	0.195	0.512	1.7e-241	2	CD24	Retinal progenitor cells
PDC.2	3.91e-100	-1.80628	0.102	0.278	1.01e-95	2	PDC	Retinal progenitor cells
NEUROD4.2	7.19e-203	-1.88363	0.079	0.364	1.85e-198	2	NEUROD4	Retinal progenitor cells
OTX2.2	8.06e-192	-1.89689	0.118	0.388	2.08e-187	2	OTX2	Retinal progenitor cells
GNB3.2	7.4e-130	-1.92304	0.154	0.363	1.91e-125	2	GNB3	Retinal progenitor cells
AIPL1.2	2.21e-99	-1.93468	0.137	0.311	5.68e-95	2	AIPL1	Retinal progenitor cells
NEUROD1.2	4.93e-232	-2.20924	0.13	0.44	1.27e-227	2	NEUROD1	Retinal progenitor cells
STMN2.2	1.86e-207	-2.32738	0.404	0.641	4.79e-203	2	STMN2	Retinal progenitor cells
NRL.2	2.24e-89	-2.37413	0.256	0.411	5.78e-85	2	NRL	Retinal progenitor cells
RCVRN.2	4.74e-86	-2.66101	0.288	0.433	1.22e-81	2	RCVRN	Retinal progenitor cells
RCVRN.3	0	2.53646	0.963	0.398	0	3	RCVRN	Rod photoreceptors
NRL.3	0	2.50742	0.932	0.377	0	3	NRL	Rod photoreceptors
PDC.3	0	2.44035	0.872	0.239	0	3	PDC	Rod photoreceptors
AIPL1.3	0	2.19224	0.947	0.27	0	3	AIPL1	Rod photoreceptors
ROM1.3	0	2.13439	0.821	0.216	0	3	ROM1	Rod photoreceptors
AL451062.1.3	0	2.12998	0.754	0.197	0	3	AL451062.1	Rod photoreceptors
NR2E3.3	0	2.06537	0.73	0.157	0	3	NR2E3	Rod photoreceptors
GNB3.3	0	2.02563	0.939	0.323	0	3	GNB3	Rod photoreceptors
RP1.3	0	1.85596	0.639	0.156	0	3	RP1	Rod photoreceptors
NEUROD1.3	0	1.83374	0.945	0.398	0	3	NEUROD1	Rod photoreceptors
RAX2.3	0	1.70051	0.56	0.152	0	3	RAX2	Rod photoreceptors
GADD45G.3	0	1.66527	0.859	0.44	0	3	GADD45G	Rod photoreceptors
CRABP2.3	0	1.63055	0.641	0.25	0	3	CRABP2	Rod photoreceptors
NTM.3	0	1.55391	0.637	0.316	0	3	NTM	Rod photoreceptors
CRX.3	0	1.54265	0.657	0.217	0	3	CRX	Rod photoreceptors
SAMD11.3	0	1.51331	0.622	0.28	0	3	SAMD11	Rod photoreceptors
ARL4D.1	0	1.50533	0.549	0.262	0	3	ARL4D	Rod photoreceptors
FAM161A.3	0	1.50215	0.734	0.356	0	3	FAM161A	Rod photoreceptors
MRLN	0	1.48582	0.499	0.128	0	3	MRLN	Rod photoreceptors
OTX2.3	0	1.46295	0.883	0.349	0	3	OTX2	Rod photoreceptors
EPB41L2	0	1.45049	0.696	0.337	0	3	EPB41L2	Rod photoreceptors
TMEM91	0	1.44625	0.516	0.167	0	3	TMEM91	Rod photoreceptors
ATP1B2.1	0	1.42328	0.775	0.415	0	3	ATP1B2	Rod photoreceptors
LOXL1.3	0	1.42025	0.568	0.255	0	3	LOXL1	Rod photoreceptors
GNAT1	0	1.41391	0.374	0.093	0	3	GNAT1	Rod photoreceptors
BTBD8.2	0	1.40056	0.556	0.253	0	3	BTBD8	Rod photoreceptors
HIST1H1C.1	0	1.38358	0.626	0.332	0	3	HIST1H1C	Rod photoreceptors
TULP1.3	0	1.37255	0.544	0.17	0	3	TULP1	Rod photoreceptors
PCBP4.3	0	1.36073	0.881	0.517	0	3	PCBP4	Rod photoreceptors
TMEM244	0	1.34872	0.415	0.109	0	3	TMEM244	Rod photoreceptors
UNC119.3	0	1.34562	0.596	0.305	0	3	UNC119	Rod photoreceptors
AMER2.3	0	1.342	0.823	0.513	0	3	AMER2	Rod photoreceptors
TUBB4B.3	0	1.2734	0.894	0.672	0	3	TUBB4B	Rod photoreceptors
2001-03-01	0	1.2513	0.492	0.182	0	3	2001-03-01	Rod photoreceptors
CPE.3	0	1.24547	0.82	0.544	0	3	CPE	Rod photoreceptors
EPS8	0	1.22986	0.444	0.164	0	3	EPS8	Rod photoreceptors
IMPG2.3	0	1.22268	0.464	0.143	0	3	IMPG2	Rod photoreceptors
CABP5	0	1.21525	0.305	0.081	0	3	CABP5	Rod photoreceptors
STX3	0	1.19763	0.453	0.16	0	3	STX3	Rod photoreceptors
PTP4A3	5.64e-277	1.17545	0.442	0.185	1.45e-272	3	PTP4A3	Rod photoreceptors
LINC00599.3	7.16e-244	1.16508	0.591	0.331	1.84e-239	3	LINC00599	Rod photoreceptors
UBXN4	0	1.1569	0.778	0.587	0	3	UBXN4	Rod photoreceptors
ANKRD33B	0	1.1502	0.427	0.15	0	3	ANKRD33B	Rod photoreceptors
PRDM1.3	0	1.14538	0.497	0.179	0	3	PRDM1	Rod photoreceptors
MAK	0	1.14426	0.366	0.111	0	3	MAK	Rod photoreceptors
SLC38A5.3	3.02e-306	1.13327	0.422	0.152	7.77e-302	3	SLC38A5	Rod photoreceptors
FSTL5.3	0	1.13065	0.51	0.205	0	3	FSTL5	Rod photoreceptors
MYO9A	4.68e-205	1.12365	0.421	0.204	1.21e-200	3	MYO9A	Rod photoreceptors
RBP3	0	1.11586	0.383	0.124	0	3	RBP3	Rod photoreceptors
GNGT2	8.49e-289	1.11026	0.324	0.099	2.19e-284	3	GNGT2	Rod photoreceptors
SLC1A7.3	7.49e-306	1.09331	0.446	0.168	1.93e-301	3	SLC1A7	Rod photoreceptors
CHRNA3.3	7.96e-253	1.07863	0.495	0.231	2.05e-248	3	CHRNA3	Rod photoreceptors
PRDX1	0	1.07083	0.823	0.675	0	3	PRDX1	Rod photoreceptors
KCNV2	3.09e-231	1.06678	0.309	0.103	7.97e-227	3	KCNV2	Rod photoreceptors
FABP7.1	9.3e-256	1.05235	0.815	0.628	2.4e-251	3	FABP7	Rod photoreceptors
PTPN13	1e-171	1.03962	0.386	0.189	2.58e-167	3	PTPN13	Rod photoreceptors
DCT.3	3.91e-240	1.03124	0.409	0.154	1.01e-235	3	DCT	Rod photoreceptors
MAP1LC3B	4.78e-215	1.01558	0.71	0.554	1.23e-210	3	MAP1LC3B	Rod photoreceptors
ISOC1	7.73e-111	1.01471	0.353	0.202	1.99e-106	3	ISOC1	Rod photoreceptors
SYP.3	1.92e-206	1.01422	0.606	0.373	4.94e-202	3	SYP	Rod photoreceptors
NEUROD4.3	0	1.01169	0.721	0.331	0	3	NEUROD4	Rod photoreceptors
GSTP1	0	1.00235	0.911	0.785	0	3	GSTP1	Rod photoreceptors
AANAT	4.65e-240	1.0009	0.336	0.119	1.2e-235	3	AANAT	Rod photoreceptors
PIK3R1	2.94e-239	0.984666	0.688	0.457	7.58e-235	3	PIK3R1	Rod photoreceptors
ADGRV1	4.92e-183	0.984052	0.362	0.162	1.27e-178	3	ADGRV1	Rod photoreceptors
MPP4	2.9e-194	0.980495	0.266	0.089	7.47e-190	3	MPP4	Rod photoreceptors
CCDC181	5.07e-152	0.967607	0.48	0.291	1.31e-147	3	CCDC181	Rod photoreceptors
C11orf96	8.38e-60	0.965078	0.253	0.148	2.16e-55	3	C11orf96	Rod photoreceptors
SLC6A17	4.28e-211	0.940665	0.279	0.094	1.1e-206	3	SLC6A17	Rod photoreceptors
EYS	1.37e-248	0.934143	0.279	0.084	3.54e-244	3	EYS	Rod photoreceptors
CDKN1C	1.63e-126	0.9298	0.56	0.403	4.21e-122	3	CDKN1C	Rod photoreceptors
RALGPS2	8.61e-136	0.922524	0.435	0.258	2.22e-131	3	RALGPS2	Rod photoreceptors
SLC40A1	1.92e-167	0.922317	0.316	0.131	4.96e-163	3	SLC40A1	Rod photoreceptors
CNGB1	4.32e-201	0.911557	0.219	0.062	1.11e-196	3	CNGB1	Rod photoreceptors
PDE4DIP	4.72e-88	0.908222	0.316	0.185	1.22e-83	3	PDE4DIP	Rod photoreceptors
H3F3B	0	0.884822	0.997	0.991	0	3	H3F3B	Rod photoreceptors
MATK	2.01e-155	0.882336	0.25	0.093	5.18e-151	3	MATK	Rod photoreceptors
SNAP25.3	5.52e-161	0.87611	0.55	0.349	1.42e-156	3	SNAP25	Rod photoreceptors
PDE6B	4.9e-156	0.875317	0.286	0.117	1.26e-151	3	PDE6B	Rod photoreceptors
SLC17A7	3.45e-144	0.861185	0.318	0.143	8.89e-140	3	SLC17A7	Rod photoreceptors
IMPG1	1e-136	0.860825	0.199	0.068	2.58e-132	3	IMPG1	Rod photoreceptors
FAM57B.3	1.27e-124	0.837575	0.525	0.354	3.28e-120	3	FAM57B	Rod photoreceptors
LAPTM4B	2.34e-96	0.835066	0.569	0.479	6.03e-92	3	LAPTM4B	Rod photoreceptors
ARL6	3.64e-130	0.824046	0.294	0.135	9.37e-126	3	ARL6	Rod photoreceptors
PGRMC2	1.69e-115	0.823309	0.54	0.398	4.36e-111	3	PGRMC2	Rod photoreceptors
PPFIA2	2.07e-88	0.816991	0.366	0.229	5.32e-84	3	PPFIA2	Rod photoreceptors
BCL2L1	4.91e-111	0.816005	0.34	0.187	1.27e-106	3	BCL2L1	Rod photoreceptors
GPR160	8.33e-172	0.8083	0.185	0.052	2.15e-167	3	GPR160	Rod photoreceptors
BAZ2B	3.66e-131	0.804099	0.698	0.606	9.43e-127	3	BAZ2B	Rod photoreceptors
PRPH2	7.33e-155	0.790173	0.213	0.072	1.89e-150	3	PRPH2	Rod photoreceptors
SSX2IP	4.86e-105	0.789841	0.497	0.338	1.25e-100	3	SSX2IP	Rod photoreceptors
RIMS2	1.11e-57	0.789712	0.302	0.198	2.85e-53	3	RIMS2	Rod photoreceptors
YPEL2	1.36e-99	0.787378	0.358	0.209	3.5e-95	3	YPEL2	Rod photoreceptors
UQCC2	6.07e-80	0.772929	0.505	0.41	1.56e-75	3	UQCC2	Rod photoreceptors
NIPAL1	8.29e-123	0.771995	0.183	0.063	2.14e-118	3	NIPAL1	Rod photoreceptors
ZNF385B	3.65e-111	0.768266	0.259	0.117	9.4e-107	3	ZNF385B	Rod photoreceptors
TMEM108	4.2e-125	0.766805	0.229	0.091	1.08e-120	3	TMEM108	Rod photoreceptors
COL16A1	5.53e-112	0.764558	0.279	0.132	1.42e-107	3	COL16A1	Rod photoreceptors
C2orf71	8.55e-160	0.759089	0.198	0.062	2.2e-155	3	C2orf71	Rod photoreceptors
TMX1	7.35e-73	0.754413	0.462	0.359	1.89e-68	3	TMX1	Rod photoreceptors
TLE3	7.49e-62	0.749591	0.406	0.301	1.93e-57	3	TLE3	Rod photoreceptors
PLA2G4C	1.28e-117	0.744802	0.192	0.07	3.29e-113	3	PLA2G4C	Rod photoreceptors
REEP6	9.29e-106	0.743822	0.247	0.113	2.39e-101	3	REEP6	Rod photoreceptors
HEBP2	1.63e-50	0.733124	0.347	0.259	4.19e-46	3	HEBP2	Rod photoreceptors
SYTL4	2.71e-110	0.732461	0.219	0.09	6.97e-106	3	SYTL4	Rod photoreceptors
PNPLA3	3.41e-91	0.732023	0.253	0.127	8.78e-87	3	PNPLA3	Rod photoreceptors
GNG13	8.04e-113	0.72753	0.257	0.113	2.07e-108	3	GNG13	Rod photoreceptors
RXRG.3	2.97e-111	0.726746	0.372	0.203	7.65e-107	3	RXRG	Rod photoreceptors
YPEL3	4.57e-96	0.725889	0.606	0.53	1.18e-91	3	YPEL3	Rod photoreceptors
GPC6	2.39e-73	0.721203	0.236	0.125	6.16e-69	3	GPC6	Rod photoreceptors
GSE1	1.49e-66	0.718809	0.381	0.267	3.84e-62	3	GSE1	Rod photoreceptors
ABHD14A	1.18e-58	0.713067	0.393	0.298	3.04e-54	3	ABHD14A	Rod photoreceptors
ATP1A3.3	1.75e-100	0.706348	0.55	0.396	4.51e-96	3	ATP1A3	Rod photoreceptors
ZBTB7A	8.72e-59	0.70532	0.286	0.18	2.25e-54	3	ZBTB7A	Rod photoreceptors
SEC62	7.68e-111	0.703175	0.72	0.676	1.98e-106	3	SEC62	Rod photoreceptors
CTBS	1.35e-78	0.700214	0.25	0.131	3.48e-74	3	CTBS	Rod photoreceptors
KIF5C.2	6.8e-97	-0.701182	0.117	0.335	1.75e-92	3	KIF5C	Rod photoreceptors
CREB5.1	4.32e-110	-0.701457	0.025	0.222	1.11e-105	3	CREB5	Rod photoreceptors
MARCKSL1	6.39e-149	-0.703019	0.799	0.933	1.65e-144	3	MARCKSL1	Rod photoreceptors
LMO4.3	1.62e-54	-0.706133	0.202	0.385	4.18e-50	3	LMO4	Rod photoreceptors
STMN4.3	2.33e-81	-0.710379	0.133	0.325	5.99e-77	3	STMN4	Rod photoreceptors
RUNX1T1.3	2.18e-78	-0.711589	0.055	0.219	5.62e-74	3	RUNX1T1	Rod photoreceptors
FDFT1	7.59e-130	-0.713077	0.099	0.355	1.95e-125	3	FDFT1	Rod photoreceptors
PCDH9	2.19e-83	-0.725092	0.079	0.264	5.63e-79	3	PCDH9	Rod photoreceptors
GNAS	9.45e-190	-0.729631	0.609	0.857	2.43e-185	3	GNAS	Rod photoreceptors
TRPM3.2	2.32e-117	-0.731139	0.024	0.23	5.98e-113	3	TRPM3	Rod photoreceptors
CRMP1.3	3.72e-97	-0.734297	0.279	0.516	9.58e-93	3	CRMP1	Rod photoreceptors
DDHD1.2	4.19e-123	-0.746761	0.118	0.371	1.08e-118	3	DDHD1	Rod photoreceptors
TYMS	2.08e-86	-0.747279	0.096	0.287	5.35e-82	3	TYMS	Rod photoreceptors
ID4.2	1.16e-107	-0.747297	0.156	0.402	3e-103	3	ID4	Rod photoreceptors
EPHB2.1	2.11e-152	-0.749268	0.079	0.361	5.44e-148	3	EPHB2	Rod photoreceptors
FEZF2	6.77e-122	-0.751257	0.041	0.262	1.74e-117	3	FEZF2	Rod photoreceptors
SRGAP3	2.57e-155	-0.75222	0.191	0.511	6.63e-151	3	SRGAP3	Rod photoreceptors
MAPK10	1.33e-161	-0.752408	0.074	0.365	3.43e-157	3	MAPK10	Rod photoreceptors
MLLT11.3	7.6e-76	-0.754352	0.333	0.537	1.96e-71	3	MLLT11	Rod photoreceptors
HMGCS1	1.26e-94	-0.758825	0.119	0.332	3.24e-90	3	HMGCS1	Rod photoreceptors
MAB21L2	1.53e-142	-0.760652	0.058	0.314	3.94e-138	3	MAB21L2	Rod photoreceptors
HMGB2	6.92e-31	-0.76194	0.447	0.597	1.78e-26	3	HMGB2	Rod photoreceptors
FOS.2	1.86e-23	-0.763823	0.626	0.709	4.8e-19	3	FOS	Rod photoreceptors
ACTB	1.22e-238	-0.766084	0.842	0.963	3.14e-234	3	ACTB	Rod photoreceptors
CSRP2	9.46e-116	-0.767198	0.238	0.512	2.44e-111	3	CSRP2	Rod photoreceptors
CNN3.1	2.01e-150	-0.770717	0.235	0.543	5.17e-146	3	CNN3	Rod photoreceptors
ONECUT2.3	3.91e-52	-0.783384	0.049	0.168	1.01e-47	3	ONECUT2	Rod photoreceptors
VCAN	9.47e-137	-0.786048	0.044	0.287	2.44e-132	3	VCAN	Rod photoreceptors
MYB.2	1.69e-132	-0.788408	0.055	0.297	4.34e-128	3	MYB	Rod photoreceptors
TFAP2B.3	1.25e-41	-0.792208	0.07	0.176	3.22e-37	3	TFAP2B	Rod photoreceptors
SLC1A3.3	4.58e-110	-0.792595	0.033	0.233	1.18e-105	3	SLC1A3	Rod photoreceptors
METRN.3	1.69e-110	-0.79528	0.119	0.353	4.36e-106	3	METRN	Rod photoreceptors
NES.2	2.16e-122	-0.798911	0.076	0.312	5.56e-118	3	NES	Rod photoreceptors
C1orf61.3	1.2e-59	-0.802359	0.098	0.244	3.08e-55	3	C1orf61	Rod photoreceptors
BAMBI.2	1.65e-115	-0.804882	0.073	0.297	4.25e-111	3	BAMBI	Rod photoreceptors
RBFOX2	1.55e-122	-0.805805	0.065	0.295	4e-118	3	RBFOX2	Rod photoreceptors
GRIA4	1.03e-136	-0.806677	0.048	0.292	2.64e-132	3	GRIA4	Rod photoreceptors
ELAVL3.3	2.93e-113	-0.822684	0.071	0.289	7.55e-109	3	ELAVL3	Rod photoreceptors
TUBB2A.3	1.11e-68	-0.822974	0.327	0.535	2.86e-64	3	TUBB2A	Rod photoreceptors
ENO1	1.58e-182	-0.82671	0.668	0.888	4.07e-178	3	ENO1	Rod photoreceptors
PROX1	1.45e-118	-0.829204	0.056	0.279	3.74e-114	3	PROX1	Rod photoreceptors
ZNF385D	4.17e-126	-0.829406	0.116	0.374	1.07e-121	3	ZNF385D	Rod photoreceptors
TAGLN3.3	1.87e-108	-0.83093	0.237	0.483	4.81e-104	3	TAGLN3	Rod photoreceptors
RTN4.2	3.41e-219	-0.83482	0.703	0.903	8.79e-215	3	RTN4	Rod photoreceptors
FABP5	9.83e-183	-0.835293	0.254	0.602	2.53e-178	3	FABP5	Rod photoreceptors
ID2.1	1.33e-118	-0.838333	0.125	0.375	3.42e-114	3	ID2	Rod photoreceptors
PLP1.3	1.21e-108	-0.840044	0.043	0.243	3.11e-104	3	PLP1	Rod photoreceptors
TLE4	3.55e-160	-0.840651	0.108	0.407	9.15e-156	3	TLE4	Rod photoreceptors
TRH	5.71e-131	-0.841575	0.058	0.301	1.47e-126	3	TRH	Rod photoreceptors
AL139246.5.2	4.32e-77	-0.848913	0.078	0.249	1.11e-72	3	AL139246.5	Rod photoreceptors
PCSK1N.3	2.18e-99	-0.860842	0.195	0.422	5.61e-95	3	PCSK1N	Rod photoreceptors
ATOH7.3	9.9e-19	-0.876431	0.045	0.1	2.55e-14	3	ATOH7	Rod photoreceptors
LGR4.2	9.87e-177	-0.894456	0.113	0.429	2.54e-172	3	LGR4	Rod photoreceptors
RND3.1	2.78e-101	-0.895537	0.071	0.28	7.15e-97	3	RND3	Rod photoreceptors
C4orf48.3	2.05e-124	-0.900544	0.168	0.431	5.28e-120	3	C4orf48	Rod photoreceptors
PMEPA1.3	9.26e-153	-0.912816	0.234	0.543	2.39e-148	3	PMEPA1	Rod photoreceptors
JPT1.3	1.49e-139	-0.922504	0.319	0.599	3.83e-135	3	JPT1	Rod photoreceptors
NOVA1	2.91e-201	-0.925195	0.059	0.384	7.5e-197	3	NOVA1	Rod photoreceptors
H1F0	3.4e-178	-0.927076	0.158	0.485	8.75e-174	3	H1F0	Rod photoreceptors
PRSS35.3	4.06e-106	-0.930667	0.034	0.227	1.04e-101	3	PRSS35	Rod photoreceptors
GAS1.3	1.33e-120	-0.947364	0.049	0.27	3.44e-116	3	GAS1	Rod photoreceptors
TTYH1.3	2.62e-118	-0.955863	0.291	0.529	6.75e-114	3	TTYH1	Rod photoreceptors
CD24.3	9.82e-93	-0.960311	0.301	0.505	2.53e-88	3	CD24	Rod photoreceptors
TOP2A.3	5.97e-36	-0.963395	0.065	0.16	1.54e-31	3	TOP2A	Rod photoreceptors
TCF4.2	1.44e-178	-0.98041	0.274	0.605	3.71e-174	3	TCF4	Rod photoreceptors
FBXW7.2	5.32e-180	-0.988857	0.131	0.451	1.37e-175	3	FBXW7	Rod photoreceptors
EGR1.2	4.01e-112	-0.992551	0.088	0.312	1.03e-107	3	EGR1	Rod photoreceptors
CENPF.3	2.11e-44	-1.00006	0.045	0.15	5.43e-40	3	CENPF	Rod photoreceptors
BASP1.3	7.44e-177	-1.01116	0.429	0.746	1.92e-172	3	BASP1	Rod photoreceptors
TFAP2A.3	8.36e-50	-1.01601	0.082	0.206	2.15e-45	3	TFAP2A	Rod photoreceptors
NSG1.3	3.13e-90	-1.01753	0.09	0.278	8.08e-86	3	NSG1	Rod photoreceptors
MGARP.1	2.02e-256	-1.06729	0.23	0.632	5.21e-252	3	MGARP	Rod photoreceptors
RTN1.3	2.77e-71	-1.09902	0.208	0.378	7.12e-67	3	RTN1	Rod photoreceptors
GAP43.3	1.18e-54	-1.10201	0.112	0.256	3.04e-50	3	GAP43	Rod photoreceptors
CXCR4.1	3.2e-195	-1.14276	0.068	0.382	8.25e-191	3	CXCR4	Rod photoreceptors
MEST.2	1.3e-218	-1.19154	0.21	0.562	3.35e-214	3	MEST	Rod photoreceptors
SOX9.3	7.17e-192	-1.20239	0.103	0.418	1.85e-187	3	SOX9	Rod photoreceptors
ID3.2	3.74e-107	-1.22484	0.123	0.345	9.64e-103	3	ID3	Rod photoreceptors
LINC00461.3	1e-206	-1.25018	0.129	0.465	2.58e-202	3	LINC00461	Rod photoreceptors
PRPH.3	1.35e-37	-1.25778	0.034	0.12	3.48e-33	3	PRPH	Rod photoreceptors
TUBB2B.3	0	-1.27864	0.697	0.931	0	3	TUBB2B	Rod photoreceptors
TF.3	9.99e-94	-1.30052	0.104	0.303	2.57e-89	3	TF	Rod photoreceptors
HES4.3	1.39e-211	-1.32044	0.171	0.516	3.57e-207	3	HES4	Rod photoreceptors
SAT1.3	1.03e-117	-1.36177	0.231	0.481	2.65e-113	3	SAT1	Rod photoreceptors
MEG3	3.85e-248	-1.3753	0.196	0.574	9.92e-244	3	MEG3	Rod photoreceptors
ASCL1.2	6.72e-178	-1.38329	0.141	0.439	1.73e-173	3	ASCL1	Rod photoreceptors
DKK3.3	1.59e-305	-1.43382	0.145	0.569	4.09e-301	3	DKK3	Rod photoreceptors
RGS16	3.3e-205	-1.4571	0.174	0.507	8.49e-201	3	RGS16	Rod photoreceptors
CLU.3	3.4e-300	-1.46856	0.182	0.599	8.77e-296	3	CLU	Rod photoreceptors
CYR61.2	5.74e-169	-1.51353	0.058	0.333	1.48e-164	3	CYR61	Rod photoreceptors
STMN2.3	3.03e-74	-1.52424	0.466	0.637	7.8e-70	3	STMN2	Rod photoreceptors
TUBA1A	0	-1.53697	0.841	0.974	0	3	TUBA1A	Rod photoreceptors
MDK	1.49e-306	-1.53924	0.183	0.6	3.84e-302	3	MDK	Rod photoreceptors
SFRP2.3	3.68e-202	-1.56466	0.112	0.432	9.47e-198	3	SFRP2	Rod photoreceptors
IGFBP2	3.75e-267	-1.57143	0.113	0.504	9.66e-263	3	IGFBP2	Rod photoreceptors
ZFP36L1.3	8.55e-227	-1.58087	0.138	0.475	2.2e-222	3	ZFP36L1	Rod photoreceptors
MIAT.1	0	-1.58393	0.113	0.581	0	3	MIAT	Rod photoreceptors
SPP1.3	1.98e-225	-1.64852	0.228	0.561	5.11e-221	3	SPP1	Rod photoreceptors
CRABP1	0	-1.76514	0.69	0.908	0	3	CRABP1	Rod photoreceptors
SOX2.3	4.28e-253	-1.79738	0.24	0.574	1.1e-248	3	SOX2	Rod photoreceptors
PAX6	0	-1.84829	0.292	0.78	0	3	PAX6	Rod photoreceptors
CCND1.3	1.18e-187	-1.87466	0.303	0.572	3.05e-183	3	CCND1	Rod photoreceptors
HES1.3	4.88e-179	-1.97167	0.188	0.479	1.26e-174	3	HES1	Rod photoreceptors
VIM.3	1.57e-300	-2.08262	0.582	0.829	4.03e-296	3	VIM	Rod photoreceptors
HES5.3	2.18e-158	-2.12525	0.116	0.389	5.61e-154	3	HES5	Rod photoreceptors
ONECUT2.4	0	3.09003	0.937	0.125	0	4	ONECUT2	Horizontal cells
ONECUT1	0	2.80281	0.888	0.079	0	4	ONECUT1	Horizontal cells
CNTNAP2	0	2.65373	0.738	0.085	0	4	CNTNAP2	Horizontal cells
TFAP2B.4	0	2.42334	0.933	0.134	0	4	TFAP2B	Horizontal cells
LHX1	0	2.323	0.533	0.011	0	4	LHX1	Horizontal cells
STMN2.4	0	2.27793	1	0.611	0	4	STMN2	Horizontal cells
CACNG3	0	2.16013	0.692	0.028	0	4	CACNG3	Horizontal cells
PROX1.1	0	2.132	0.829	0.242	0	4	PROX1	Horizontal cells
AL512380.1	0	2.08458	0.434	0.069	0	4	AL512380.1	Horizontal cells
STMN4.4	0	2.07162	0.931	0.286	0	4	STMN4	Horizontal cells
C1QL1	0	1.85713	0.513	0.086	0	4	C1QL1	Horizontal cells
ONECUT3	0	1.79112	0.604	0.024	0	4	ONECUT3	Horizontal cells
PTF1A	0	1.72401	0.416	0.073	0	4	PTF1A	Horizontal cells
HTRA1	0	1.63082	0.574	0.093	0	4	HTRA1	Horizontal cells
CXXC5.2	0	1.57365	0.958	0.615	0	4	CXXC5	Horizontal cells
RTN1.4	0	1.53911	0.949	0.342	0	4	RTN1	Horizontal cells
TFAP2A.4	0	1.44331	0.78	0.172	0	4	TFAP2A	Horizontal cells
SOX4.1	0	1.43726	1	0.972	0	4	SOX4	Horizontal cells
NSG2.3	0	1.43658	0.751	0.24	0	4	NSG2	Horizontal cells
FAM107B	0	1.41508	0.598	0.189	0	4	FAM107B	Horizontal cells
TNR	0	1.39289	0.374	0.006	0	4	TNR	Horizontal cells
CNTN4	0	1.3737	0.514	0.071	0	4	CNTN4	Horizontal cells
IER5L	0	1.36001	0.565	0.241	0	4	IER5L	Horizontal cells
THSD7A	0	1.29869	0.648	0.228	0	4	THSD7A	Horizontal cells
PPP1R1A	0	1.2959	0.629	0.147	0	4	PPP1R1A	Horizontal cells
PCDH9.1	0	1.29281	0.549	0.241	0	4	PCDH9	Horizontal cells
TAGLN3.4	0	1.24907	0.889	0.452	0	4	TAGLN3	Horizontal cells
TPM3	0	1.21829	0.703	0.336	0	4	TPM3	Horizontal cells
MAPT.3	0	1.21551	0.669	0.19	0	4	MAPT	Horizontal cells
GRIA3	0	1.18264	0.355	0.025	0	4	GRIA3	Horizontal cells
TLE4.1	2.08e-246	1.16756	0.627	0.381	5.35e-242	4	TLE4	Horizontal cells
TANC1	0	1.14033	0.423	0.075	0	4	TANC1	Horizontal cells
CD24.4	0	1.12349	0.916	0.475	0	4	CD24	Horizontal cells
LHX1-DT	0	1.12022	0.297	0.004	0	4	LHX1-DT	Horizontal cells
MALT1	0	1.08405	0.395	0.115	0	4	MALT1	Horizontal cells
TUBB2B.4	0	1.07953	0.997	0.916	0	4	TUBB2B	Horizontal cells
ZEB2	0	1.07219	0.833	0.544	0	4	ZEB2	Horizontal cells
NDRG4	0	1.06446	0.534	0.174	0	4	NDRG4	Horizontal cells
CDC42EP3	0	1.06246	0.513	0.189	0	4	CDC42EP3	Horizontal cells
NHSL1	0	1.051	0.606	0.29	0	4	NHSL1	Horizontal cells
LINGO1	0	1.03092	0.5	0.149	0	4	LINGO1	Horizontal cells
JPT1.4	0	1.01659	0.878	0.572	0	4	JPT1	Horizontal cells
CAMK2N1	8.83e-288	1.01491	0.753	0.474	2.28e-283	4	CAMK2N1	Horizontal cells
NTRK2	0	1.00971	0.358	0.032	0	4	NTRK2	Horizontal cells
AL391650.1	0	1.00717	0.717	0.344	0	4	AL391650.1	Horizontal cells
HIST3H2A	0	1.00708	0.691	0.365	0	4	HIST3H2A	Horizontal cells
EVL	0	1.00409	0.726	0.404	0	4	EVL	Horizontal cells
SCRT2	0	1.0037	0.418	0.084	0	4	SCRT2	Horizontal cells
NDST3	0	0.999857	0.311	0.022	0	4	NDST3	Horizontal cells
LMO4.4	0	0.993046	0.699	0.361	0	4	LMO4	Horizontal cells
B3GAT2	0	0.986579	0.353	0.085	0	4	B3GAT2	Horizontal cells
AC016044.1	0	0.970711	0.305	0.006	0	4	AC016044.1	Horizontal cells
PLXNA2	0	0.96893	0.414	0.068	0	4	PLXNA2	Horizontal cells
APBB2	0	0.961847	0.442	0.126	0	4	APBB2	Horizontal cells
TMEFF2	0	0.960608	0.288	0.046	0	4	TMEFF2	Horizontal cells
RHOB	2.1e-203	0.945632	0.655	0.418	5.4e-199	4	RHOB	Horizontal cells
BARHL2	0	0.941102	0.408	0.09	0	4	BARHL2	Horizontal cells
IGLON5	0	0.929134	0.489	0.167	0	4	IGLON5	Horizontal cells
KIF5C.3	0	0.928477	0.7	0.306	0	4	KIF5C	Horizontal cells
TTC9B	0	0.912382	0.476	0.134	0	4	TTC9B	Horizontal cells
MLLT11.4	0	0.898711	0.867	0.511	0	4	MLLT11	Horizontal cells
GRIA4.1	5.76e-287	0.891777	0.58	0.266	1.48e-282	4	GRIA4	Horizontal cells
CELF4.3	0	0.891669	0.662	0.263	0	4	CELF4	Horizontal cells
DRD2	0	0.888521	0.247	0.006	0	4	DRD2	Horizontal cells
RUNX1T1.4	0	0.880886	0.568	0.194	0	4	RUNX1T1	Horizontal cells
BASP1.4	0	0.864504	0.958	0.72	0	4	BASP1	Horizontal cells
TMOD1	0	0.860635	0.233	0.004	0	4	TMOD1	Horizontal cells
GPR85	0	0.854177	0.353	0.078	0	4	GPR85	Horizontal cells
INA.3	0	0.839669	0.747	0.319	0	4	INA	Horizontal cells
DCX.2	0	0.836821	0.544	0.194	0	4	DCX	Horizontal cells
NKAIN2	0	0.836457	0.235	0.011	0	4	NKAIN2	Horizontal cells
MTSS1	8.86e-222	0.825899	0.421	0.181	2.28e-217	4	MTSS1	Horizontal cells
MEGF11	0	0.805879	0.237	0.014	0	4	MEGF11	Horizontal cells
GALR2	0	0.805433	0.232	0.007	0	4	GALR2	Horizontal cells
PAK5	6.15e-301	0.802694	0.332	0.097	1.59e-296	4	PAK5	Horizontal cells
ARL4C	2.51e-182	0.797472	0.612	0.369	6.47e-178	4	ARL4C	Horizontal cells
PAX6.1	0	0.79671	0.969	0.746	0	4	PAX6	Horizontal cells
TENM2	0	0.795956	0.263	0.041	0	4	TENM2	Horizontal cells
NSG1.4	0	0.794574	0.703	0.248	0	4	NSG1	Horizontal cells
LMO1	2.1e-238	0.782084	0.328	0.111	5.41e-234	4	LMO1	Horizontal cells
TCEAL7	3.41e-205	0.773889	0.628	0.375	8.79e-201	4	TCEAL7	Horizontal cells
SCG5.3	0	0.764553	0.624	0.26	0	4	SCG5	Horizontal cells
CITED2	4.69e-180	0.763384	0.652	0.415	1.21e-175	4	CITED2	Horizontal cells
MEGF10	0	0.762169	0.258	0.029	0	4	MEGF10	Horizontal cells
MAGI2	5.74e-236	0.76073	0.387	0.148	1.48e-231	4	MAGI2	Horizontal cells
ZBTB38	2e-210	0.758252	0.364	0.143	5.14e-206	4	ZBTB38	Horizontal cells
FLRT3	0	0.753656	0.267	0.06	0	4	FLRT3	Horizontal cells
TMSB10.3	0	0.745004	0.997	0.973	0	4	TMSB10	Horizontal cells
MT-ND1.1	0	0.743709	0.989	0.883	0	4	MT-ND1	Horizontal cells
CRMP1.4	7.76e-300	0.731016	0.831	0.489	2e-295	4	CRMP1	Horizontal cells
RAB11FIP4	0	0.729446	0.279	0.052	0	4	RAB11FIP4	Horizontal cells
SEMA6A	4.18e-170	0.728478	0.463	0.236	1.08e-165	4	SEMA6A	Horizontal cells
ELAVL3.4	2.89e-257	0.727127	0.594	0.264	7.44e-253	4	ELAVL3	Horizontal cells
BCL11A	1.4e-187	0.720182	0.496	0.253	3.62e-183	4	BCL11A	Horizontal cells
LNP1	1.96e-285	0.718186	0.277	0.072	5.04e-281	4	LNP1	Horizontal cells
TRIB1	3.64e-174	0.716247	0.306	0.118	9.37e-170	4	TRIB1	Horizontal cells
MTRNR2L8	7.26e-78	0.714792	0.341	0.2	1.87e-73	4	MTRNR2L8	Horizontal cells
NTRK1	0	0.714659	0.228	0.034	0	4	NTRK1	Horizontal cells
NT5C3B	1.04e-171	0.713969	0.513	0.289	2.68e-167	4	NT5C3B	Horizontal cells
MT1F	0	0.711357	0.247	0.036	0	4	MT1F	Horizontal cells
PCSK1N.4	7.09e-230	0.708531	0.728	0.396	1.83e-225	4	PCSK1N	Horizontal cells
CCNI	0	0.707588	0.975	0.893	0	4	CCNI	Horizontal cells
YPEL2.1	1.14e-172	0.706154	0.435	0.205	2.94e-168	4	YPEL2	Horizontal cells
COX6A1	1.7e-250	0.704631	0.891	0.702	4.38e-246	4	COX6A1	Horizontal cells
CALR	1.02e-112	-0.701852	0.514	0.691	2.62e-108	4	CALR	Horizontal cells
LMAN1	5.09e-111	-0.702066	0.256	0.489	1.31e-106	4	LMAN1	Horizontal cells
ODC1	1.09e-113	-0.705276	0.342	0.573	2.82e-109	4	ODC1	Horizontal cells
IER2.2	4.48e-78	-0.707134	0.456	0.619	1.16e-73	4	IER2	Horizontal cells
PKM.3	3.88e-105	-0.710604	0.692	0.793	9.99e-101	4	PKM	Horizontal cells
CRYBG3	5.51e-102	-0.714954	0.015	0.196	1.42e-97	4	CRYBG3	Horizontal cells
LHX9	1.41e-55	-0.715444	0.046	0.171	3.64e-51	4	LHX9	Horizontal cells
FAM89A	4.66e-108	-0.718362	0.025	0.219	1.2e-103	4	FAM89A	Horizontal cells
RBP1	5.92e-122	-0.718621	0.771	0.852	1.52e-117	4	RBP1	Horizontal cells
TMEM98	7.46e-125	-0.71959	0.19	0.446	1.92e-120	4	TMEM98	Horizontal cells
GRID2	1.65e-110	-0.720826	0.032	0.235	4.24e-106	4	GRID2	Horizontal cells
SYNE2	1.93e-105	-0.721933	0.211	0.441	4.97e-101	4	SYNE2	Horizontal cells
TBX2-AS1	5.48e-118	-0.723456	0.086	0.316	1.41e-113	4	TBX2-AS1	Horizontal cells
CA14.3	2.81e-106	-0.724357	0.031	0.225	7.23e-102	4	CA14	Horizontal cells
CLIC1	3.44e-129	-0.72918	0.078	0.323	8.87e-125	4	CLIC1	Horizontal cells
PBX1	1.24e-102	-0.729534	0.218	0.452	3.2e-98	4	PBX1	Horizontal cells
WIF1.2	1.1e-52	-0.732314	0.012	0.114	2.84e-48	4	WIF1	Horizontal cells
SORBS2	1.2e-125	-0.738418	0.086	0.329	3.08e-121	4	SORBS2	Horizontal cells
SPARC	2.02e-72	-0.739321	0.026	0.169	5.19e-68	4	SPARC	Horizontal cells
SLC1A7.4	2.33e-92	-0.740282	0.021	0.189	6e-88	4	SLC1A7	Horizontal cells
SLC38A5.4	5.51e-85	-0.745825	0.017	0.172	1.42e-80	4	SLC38A5	Horizontal cells
TOX3.2	1.3e-101	-0.747227	0.195	0.416	3.35e-97	4	TOX3	Horizontal cells
DBI.1	4.71e-100	-0.750599	0.41	0.588	1.21e-95	4	DBI	Horizontal cells
CCDC181.1	1.08e-116	-0.756094	0.082	0.311	2.78e-112	4	CCDC181	Horizontal cells
IMPG2.4	1.93e-80	-0.75721	0.017	0.165	4.96e-76	4	IMPG2	Horizontal cells
SLC16A1	1.88e-124	-0.759254	0.097	0.339	4.85e-120	4	SLC16A1	Horizontal cells
TFDP2	7.23e-116	-0.762387	0.212	0.453	1.86e-111	4	TFDP2	Horizontal cells
DDHD1.3	3.59e-86	-0.76407	0.171	0.369	9.25e-82	4	DDHD1	Horizontal cells
MAP1B	2.86e-135	-0.764446	0.846	0.875	7.38e-131	4	MAP1B	Horizontal cells
SMIM20.1	1.11e-122	-0.764669	0.14	0.388	2.85e-118	4	SMIM20	Horizontal cells
COL2A1.2	1.32e-117	-0.767585	0.018	0.223	3.4e-113	4	COL2A1	Horizontal cells
H2AFZ	1.61e-157	-0.768673	0.799	0.869	4.16e-153	4	H2AFZ	Horizontal cells
MCAM.2	3.27e-99	-0.771211	0.022	0.201	8.43e-95	4	MCAM	Horizontal cells
SRRM4.3	2.15e-102	-0.774156	0.125	0.34	5.53e-98	4	SRRM4	Horizontal cells
KDR.3	7.14e-112	-0.776509	0.014	0.208	1.84e-107	4	KDR	Horizontal cells
RARRES2	2.63e-109	-0.777468	0.053	0.26	6.78e-105	4	RARRES2	Horizontal cells
ZFHX4	2.81e-93	-0.78842	0.044	0.228	7.23e-89	4	ZFHX4	Horizontal cells
TBX2	1.65e-136	-0.79836	0.126	0.389	4.24e-132	4	TBX2	Horizontal cells
FOSB.2	9.45e-81	-0.800642	0.136	0.317	2.43e-76	4	FOSB	Horizontal cells
EML1	2.94e-158	-0.804614	0.063	0.337	7.57e-154	4	EML1	Horizontal cells
LAPTM4A	1.49e-162	-0.810285	0.24	0.528	3.84e-158	4	LAPTM4A	Horizontal cells
LINC01833.1	5.7e-120	-0.816857	0.161	0.404	1.47e-115	4	LINC01833	Horizontal cells
ID4.3	1.81e-103	-0.818336	0.174	0.4	4.67e-99	4	ID4	Horizontal cells
PTTG1.1	3.55e-54	-0.826147	0.045	0.166	9.15e-50	4	PTTG1	Horizontal cells
UBE2C.3	1.5e-40	-0.827784	0.032	0.125	3.86e-36	4	UBE2C	Horizontal cells
EGR1.3	1.28e-41	-0.828001	0.186	0.307	3.29e-37	4	EGR1	Horizontal cells
MIAT.2	2.37e-68	-0.828514	0.431	0.565	6.11e-64	4	MIAT	Horizontal cells
NUSAP1.1	2.92e-60	-0.83415	0.027	0.149	7.51e-56	4	NUSAP1	Horizontal cells
ANXA5	4.37e-165	-0.834624	0.075	0.362	1.13e-160	4	ANXA5	Horizontal cells
SMC4	1.26e-79	-0.839497	0.078	0.249	3.25e-75	4	SMC4	Horizontal cells
DEK	5.83e-121	-0.839619	0.477	0.668	1.5e-116	4	DEK	Horizontal cells
CRB1.2	1.66e-145	-0.846469	0.055	0.31	4.27e-141	4	CRB1	Horizontal cells
PLEKHB1	7.8e-138	-0.851907	0.025	0.258	2.01e-133	4	PLEKHB1	Horizontal cells
PTPRZ1	7.4e-118	-0.858081	0.223	0.46	1.91e-113	4	PTPRZ1	Horizontal cells
SLC1A3.4	3.06e-113	-0.859569	0.03	0.233	7.88e-109	4	SLC1A3	Horizontal cells
RXRG.4	4.78e-104	-0.85994	0.03	0.22	1.23e-99	4	RXRG	Horizontal cells
JUNB.1	7.6e-57	-0.860062	0.323	0.464	1.96e-52	4	JUNB	Horizontal cells
TULP1.4	3.53e-100	-0.864826	0.018	0.196	9.1e-96	4	TULP1	Horizontal cells
RTN4.3	2.71e-230	-0.864888	0.837	0.896	6.97e-226	4	RTN4	Horizontal cells
SMAD2	2.35e-158	-0.86911	0.163	0.451	6.06e-154	4	SMAD2	Horizontal cells
VSX2	2.41e-141	-0.871547	0.031	0.271	6.22e-137	4	VSX2	Horizontal cells
CRNDE	4.51e-171	-0.874223	0.037	0.317	1.16e-166	4	CRNDE	Horizontal cells
GADD45G.4	5.23e-32	-0.879696	0.385	0.463	1.35e-27	4	GADD45G	Horizontal cells
MSI1	3.36e-147	-0.881347	0.266	0.53	8.64e-143	4	MSI1	Horizontal cells
GSTP1.1	1.02e-130	-0.885366	0.712	0.794	2.64e-126	4	GSTP1	Horizontal cells
TMX1.1	5.91e-146	-0.88603	0.111	0.376	1.52e-141	4	TMX1	Horizontal cells
TPI1	7.3e-259	-0.886834	0.774	0.897	1.88e-254	4	TPI1	Horizontal cells
NOTCH1.1	3.31e-160	-0.893468	0.036	0.303	8.52e-156	4	NOTCH1	Horizontal cells
SOX9.4	2.62e-92	-0.893797	0.213	0.412	6.75e-88	4	SOX9	Horizontal cells
LIMCH1.3	3.85e-151	-0.89675	0.025	0.274	9.91e-147	4	LIMCH1	Horizontal cells
STON2.2	1.28e-168	-0.897955	0.06	0.346	3.28e-164	4	STON2	Horizontal cells
GATB.3	2.51e-125	-0.900916	0.086	0.32	6.46e-121	4	GATB	Horizontal cells
CHRNA3.4	3.28e-133	-0.901103	0.027	0.254	8.45e-129	4	CHRNA3	Horizontal cells
CKS2	4.46e-98	-0.902236	0.113	0.319	1.15e-93	4	CKS2	Horizontal cells
B2M	8.98e-125	-0.909262	0.073	0.307	2.31e-120	4	B2M	Horizontal cells
ILDR2.2	5.31e-158	-0.909907	0.039	0.304	1.37e-153	4	ILDR2	Horizontal cells
RAX2.4	1.18e-84	-0.911898	0.022	0.179	3.03e-80	4	RAX2	Horizontal cells
PGRMC2.1	2.39e-152	-0.913832	0.14	0.418	6.16e-148	4	PGRMC2	Horizontal cells
VCAN.1	2.53e-159	-0.915891	0.025	0.288	6.51e-155	4	VCAN	Horizontal cells
RASD1.1	1.15e-73	-0.924591	0.125	0.297	2.96e-69	4	RASD1	Horizontal cells
IGFBP2.1	1.95e-70	-0.92551	0.332	0.493	5.02e-66	4	IGFBP2	Horizontal cells
TLE3.1	3.21e-152	-0.928437	0.057	0.318	8.28e-148	4	TLE3	Horizontal cells
MYB.3	3.5e-148	-0.929831	0.044	0.297	9.02e-144	4	MYB	Horizontal cells
LHX2	6.17e-161	-0.936669	0.067	0.34	1.59e-156	4	LHX2	Horizontal cells
TAGLN2	9.84e-174	-0.938361	0.059	0.346	2.53e-169	4	TAGLN2	Horizontal cells
NR2F1	2.48e-160	-0.94009	0.191	0.481	6.39e-156	4	NR2F1	Horizontal cells
PLP1.4	3.55e-127	-0.946392	0.025	0.244	9.14e-123	4	PLP1	Horizontal cells
GNAI2	1.78e-181	-0.947287	0.182	0.493	4.58e-177	4	GNAI2	Horizontal cells
LDHA	5.92e-250	-0.949472	0.663	0.845	1.53e-245	4	LDHA	Horizontal cells
CADM2.1	1.26e-153	-0.9649	0.18	0.46	3.26e-149	4	CADM2	Horizontal cells
SYT1	1.83e-182	-0.976265	0.552	0.754	4.71e-178	4	SYT1	Horizontal cells
GAS1.4	3.42e-119	-1.00202	0.052	0.27	8.8e-115	4	GAS1	Horizontal cells
CSRP2.1	5.63e-140	-1.00918	0.247	0.511	1.45e-135	4	CSRP2	Horizontal cells
PRDM1.4	1.62e-94	-1.01255	0.028	0.202	4.17e-90	4	PRDM1	Horizontal cells
TYMS.1	1.58e-124	-1.01279	0.062	0.288	4.06e-120	4	TYMS	Horizontal cells
FBXW7.3	2.97e-147	-1.02032	0.18	0.448	7.64e-143	4	FBXW7	Horizontal cells
LGI4	1.96e-182	-1.02179	0.033	0.326	5.06e-178	4	LGI4	Horizontal cells
PRSS35.4	4.57e-123	-1.03251	0.018	0.228	1.18e-118	4	PRSS35	Horizontal cells
ATP1B2.2	4.2e-122	-1.0335	0.21	0.443	1.08e-117	4	ATP1B2	Horizontal cells
TMEM123	2.78e-218	-1.0381	0.053	0.387	7.15e-214	4	TMEM123	Horizontal cells
MYO10.3	2.64e-167	-1.04011	0.063	0.341	6.8e-163	4	MYO10	Horizontal cells
GNG5	1.15e-219	-1.04143	0.305	0.616	2.97e-215	4	GNG5	Horizontal cells
BTG2.2	4.41e-111	-1.04663	0.24	0.461	1.14e-106	4	BTG2	Horizontal cells
LOXL1.4	2.14e-135	-1.06321	0.046	0.281	5.52e-131	4	LOXL1	Horizontal cells
ID3.3	5.52e-59	-1.06586	0.188	0.342	1.42e-54	4	ID3	Horizontal cells
BSG	3.46e-271	-1.07225	0.537	0.778	8.92e-267	4	BSG	Horizontal cells
PRPH.4	0.000188967	-1.07339	0.096	0.117	1	4	PRPH	Horizontal cells
AL139246.5.3	6e-105	-1.07699	0.053	0.25	1.54e-100	4	AL139246.5	Horizontal cells
QDPR.3	4.71e-160	-1.09194	0.121	0.4	1.21e-155	4	QDPR	Horizontal cells
HIST1H1C.2	1.78e-118	-1.09575	0.129	0.356	4.59e-114	4	HIST1H1C	Horizontal cells
CNN3.2	1.1e-222	-1.10132	0.205	0.545	2.83e-218	4	CNN3	Horizontal cells
CCDC34	6.32e-179	-1.10442	0.1	0.401	1.63e-174	4	CCDC34	Horizontal cells
HMGN2	8.25e-254	-1.10944	0.754	0.867	2.13e-249	4	HMGN2	Horizontal cells
CXCR4.2	2.9e-165	-1.12242	0.1	0.38	7.48e-161	4	CXCR4	Horizontal cells
CENPF.4	5.99e-53	-1.13921	0.036	0.15	1.54e-48	4	CENPF	Horizontal cells
CRX.4	2.7e-131	-1.14337	0.026	0.248	6.94e-127	4	CRX	Horizontal cells
C1orf61.4	4.39e-115	-1.15084	0.04	0.247	1.13e-110	4	C1orf61	Horizontal cells
NFIB	6.44e-184	-1.19695	0.043	0.335	1.66e-179	4	NFIB	Horizontal cells
RP1.4	1.33e-94	-1.19759	0.018	0.187	3.42e-90	4	RP1	Horizontal cells
PMEPA1.4	3.74e-187	-1.19993	0.241	0.542	9.63e-183	4	PMEPA1	Horizontal cells
TOP2A.4	1.23e-63	-1.20088	0.032	0.162	3.16e-59	4	TOP2A	Horizontal cells
FXYD1.2	2.6e-234	-1.23865	0.052	0.4	6.7e-230	4	FXYD1	Horizontal cells
SLC2A1	1.49e-278	-1.24525	0.154	0.543	3.83e-274	4	SLC2A1	Horizontal cells
FAM161A.4	9.05e-166	-1.24719	0.106	0.387	2.33e-161	4	FAM161A	Horizontal cells
SSX2IP.1	5.18e-213	-1.26456	0.039	0.36	1.33e-208	4	SSX2IP	Horizontal cells
NR2E3.4	2.89e-96	-1.28043	0.02	0.192	7.43e-92	4	NR2E3	Horizontal cells
DAPL1.1	4.92e-219	-1.2859	0.143	0.486	1.27e-214	4	DAPL1	Horizontal cells
HIST1H4C.3	1.97e-32	-1.28788	0.557	0.631	5.07e-28	4	HIST1H4C	Horizontal cells
CRABP2.4	1.93e-87	-1.30842	0.097	0.277	4.97e-83	4	CRABP2	Horizontal cells
DCT.4	3.93e-80	-1.32283	0.023	0.173	1.01e-75	4	DCT	Horizontal cells
TCF4.3	3.14e-238	-1.3337	0.269	0.605	8.08e-234	4	TCF4	Horizontal cells
CDH2	0	-1.33391	0.194	0.64	0	4	CDH2	Horizontal cells
EPB41L2.1	2.72e-219	-1.33798	0.04	0.369	7.01e-215	4	EPB41L2	Horizontal cells
SELENOP.3	1.87e-251	-1.34942	0.046	0.409	4.82e-247	4	SELENOP	Horizontal cells
PIK3R1.1	1.99e-221	-1.39352	0.148	0.483	5.12e-217	4	PIK3R1	Horizontal cells
FOS.3	4.12e-95	-1.41487	0.615	0.71	1.06e-90	4	FOS	Horizontal cells
DKK3.4	6.62e-270	-1.44725	0.197	0.566	1.7e-265	4	DKK3	Horizontal cells
MEST.3	2.1e-270	-1.46629	0.193	0.562	5.42e-266	4	MEST	Horizontal cells
CADM1	0	-1.4689	0.165	0.607	0	4	CADM1	Horizontal cells
HES4.4	4.8e-222	-1.48074	0.181	0.515	1.24e-217	4	HES4	Horizontal cells
CLU.4	1.2e-242	-1.49057	0.273	0.594	3.09e-238	4	CLU	Horizontal cells
GPM6B.3	0	-1.52686	0.151	0.583	0	4	GPM6B	Horizontal cells
ROM1.4	2.31e-114	-1.54473	0.05	0.254	5.96e-110	4	ROM1	Horizontal cells
HES6.1	1.16e-188	-1.54571	0.253	0.544	3e-184	4	HES6	Horizontal cells
AL451062.1.4	2.97e-113	-1.55089	0.034	0.233	7.65e-109	4	AL451062.1	Horizontal cells
TUBB4B.4	4.94e-280	-1.55607	0.423	0.695	1.27e-275	4	TUBB4B	Horizontal cells
CKB	0	-1.58978	0.959	0.983	0	4	CKB	Horizontal cells
TUBA1B.1	0	-1.59451	0.663	0.83	0	4	TUBA1B	Horizontal cells
HMGB2.1	7.58e-201	-1.61903	0.313	0.604	1.95e-196	4	HMGB2	Horizontal cells
LINC00461.4	0	-1.6582	0.054	0.468	0	4	LINC00461	Horizontal cells
CYR61.3	7.82e-183	-1.6668	0.047	0.333	2.01e-178	4	CYR61	Horizontal cells
TF.4	7.31e-150	-1.67562	0.052	0.305	1.88e-145	4	TF	Horizontal cells
SFRP2.4	8.63e-210	-1.6854	0.111	0.432	2.22e-205	4	SFRP2	Horizontal cells
MEIS2.3	4.3e-211	-1.69135	0.058	0.388	1.11e-206	4	MEIS2	Horizontal cells
ASCL1.3	2.28e-241	-1.70032	0.09	0.441	5.87e-237	4	ASCL1	Horizontal cells
ID1.2	5.82e-286	-1.71545	0.114	0.502	1.5e-281	4	ID1	Horizontal cells
NEUROD4.4	8.42e-139	-1.73824	0.127	0.36	2.17e-134	4	NEUROD4	Horizontal cells
SAT1.4	2.64e-161	-1.73931	0.21	0.482	6.8e-157	4	SAT1	Horizontal cells
RAX	0	-1.77043	0.082	0.557	0	4	RAX	Horizontal cells
TTYH1.4	0	-1.78916	0.13	0.536	0	4	TTYH1	Horizontal cells
ZFP36L1.4	9.02e-284	-1.89436	0.095	0.476	2.32e-279	4	ZFP36L1	Horizontal cells
SPP1.4	2.63e-243	-1.90006	0.242	0.56	6.78e-239	4	SPP1	Horizontal cells
PDC.4	1.92e-129	-1.98752	0.056	0.279	4.94e-125	4	PDC	Horizontal cells
OTX2.4	1.5e-208	-2.04707	0.078	0.388	3.86e-204	4	OTX2	Horizontal cells
GNB3.4	2.18e-147	-2.09118	0.12	0.364	5.63e-143	4	GNB3	Horizontal cells
AIPL1.4	4.35e-138	-2.15241	0.077	0.313	1.12e-133	4	AIPL1	Horizontal cells
NEUROD1.4	1.72e-193	-2.20329	0.149	0.437	4.43e-189	4	NEUROD1	Horizontal cells
CRABP1.1	0	-2.23364	0.702	0.907	0	4	CRABP1	Horizontal cells
HES5.4	2.17e-152	-2.2512	0.13	0.388	5.59e-148	4	HES5	Horizontal cells
SOX2.4	0	-2.49105	0.112	0.58	0	4	SOX2	Horizontal cells
ZFP36L2.3	0	-2.51902	0.147	0.637	0	4	ZFP36L2	Horizontal cells
HES1.4	2.09e-265	-2.56008	0.119	0.482	5.39e-261	4	HES1	Horizontal cells
CCND1.4	0	-2.61222	0.175	0.578	0	4	CCND1	Horizontal cells
FABP7.2	0	-2.71282	0.231	0.657	0	4	FABP7	Horizontal cells
NRL.4	1.56e-165	-2.79622	0.151	0.415	4.03e-161	4	NRL	Horizontal cells
VIM.4	0	-2.80342	0.526	0.831	0	4	VIM	Horizontal cells
RCVRN.4	5.07e-167	-3.11492	0.176	0.437	1.31e-162	4	RCVRN	Horizontal cells
MEIS2.4	0	2.74964	0.856	0.349	0	5	MEIS2	Amacrine cells
PCP4.2	0	2.43926	0.439	0.123	0	5	PCP4	Amacrine cells
RND3.2	0	2.32584	0.752	0.247	0	5	RND3	Amacrine cells
TFAP2A.5	0	2.30156	0.77	0.173	0	5	TFAP2A	Amacrine cells
RALYL	0	2.24258	0.617	0.102	0	5	RALYL	Amacrine cells
GAD2	0	1.91441	0.647	0.079	0	5	GAD2	Amacrine cells
TFAP2C	0	1.82508	0.446	0.052	0	5	TFAP2C	Amacrine cells
PCDH9.2	0	1.80256	0.656	0.236	0	5	PCDH9	Amacrine cells
LMO4.5	1.92e-91	1.79708	0.496	0.371	4.94e-87	5	LMO4	Amacrine cells
CELF4.4	0	1.77133	0.722	0.26	0	5	CELF4	Amacrine cells
ZFHX3.2	0	1.74057	0.636	0.212	0	5	ZFHX3	Amacrine cells
KIF5C.4	0	1.71217	0.792	0.302	0	5	KIF5C	Amacrine cells
ZNF503	0	1.70333	0.529	0.105	0	5	ZNF503	Amacrine cells
ZNF385D.1	0	1.69233	0.797	0.34	0	5	ZNF385D	Amacrine cells
LHX9.1	0	1.6921	0.473	0.15	0	5	LHX9	Amacrine cells
CXCL14	7.4e-180	1.66925	0.109	0.019	1.91e-175	5	CXCL14	Amacrine cells
RBFOX2.1	0	1.63541	0.784	0.261	0	5	RBFOX2	Amacrine cells
RD3L	0	1.62006	0.459	0.045	0	5	RD3L	Amacrine cells
TFAP2B.5	0	1.57633	0.568	0.152	0	5	TFAP2B	Amacrine cells
BHLHE22	0	1.55646	0.493	0.161	0	5	BHLHE22	Amacrine cells
TAGLN3.5	0	1.52966	0.856	0.453	0	5	TAGLN3	Amacrine cells
MIR181A1HG	0	1.52472	0.662	0.206	0	5	MIR181A1HG	Amacrine cells
RTN1.5	0	1.52409	0.898	0.345	0	5	RTN1	Amacrine cells
FAT3	0	1.48767	0.593	0.203	0	5	FAT3	Amacrine cells
ZFHX4.1	0	1.42559	0.55	0.203	0	5	ZFHX4	Amacrine cells
RELN	0	1.41155	0.359	0.083	0	5	RELN	Amacrine cells
NRXN1.3	0	1.41003	0.679	0.234	0	5	NRXN1	Amacrine cells
PAX6.2	0	1.40787	0.969	0.746	0	5	PAX6	Amacrine cells
DCX.3	0	1.3987	0.667	0.188	0	5	DCX	Amacrine cells
SCG5.4	0	1.39541	0.744	0.254	0	5	SCG5	Amacrine cells
PBX1.1	0	1.38583	0.686	0.43	0	5	PBX1	Amacrine cells
RPRM	0	1.38222	0.363	0.092	0	5	RPRM	Amacrine cells
SCN2A	0	1.36523	0.538	0.09	0	5	SCN2A	Amacrine cells
PRDM8	0	1.36326	0.322	0.08	0	5	PRDM8	Amacrine cells
JPH4	0	1.34427	0.521	0.091	0	5	JPH4	Amacrine cells
PRKCB	0	1.33028	0.421	0.082	0	5	PRKCB	Amacrine cells
TUBB2A.4	0	1.3153	0.897	0.507	0	5	TUBB2A	Amacrine cells
AL512380.1.1	0	1.30391	0.437	0.069	0	5	AL512380.1	Amacrine cells
FEZ1	0	1.29935	0.652	0.225	0	5	FEZ1	Amacrine cells
TAC1	6.05e-295	1.29732	0.248	0.058	1.56e-290	5	TAC1	Amacrine cells
RUNX1T1.5	0	1.28802	0.536	0.196	0	5	RUNX1T1	Amacrine cells
ELAVL3.5	0	1.28418	0.717	0.258	0	5	ELAVL3	Amacrine cells
GAD1	0	1.27552	0.38	0.022	0	5	GAD1	Amacrine cells
NREP.3	0	1.27435	0.919	0.664	0	5	NREP	Amacrine cells
GRIA2	0	1.27097	0.513	0.13	0	5	GRIA2	Amacrine cells
ANK3	0	1.26747	0.619	0.216	0	5	ANK3	Amacrine cells
RBFOX1	0	1.25594	0.37	0.069	0	5	RBFOX1	Amacrine cells
SYT1.1	0	1.25096	0.94	0.735	0	5	SYT1	Amacrine cells
OLFM3	0	1.21807	0.298	0.064	0	5	OLFM3	Amacrine cells
PCLO	6.25e-297	1.21052	0.536	0.245	1.61e-292	5	PCLO	Amacrine cells
PCSK1N.5	0	1.19921	0.834	0.391	0	5	PCSK1N	Amacrine cells
GRIA4.2	0	1.19504	0.644	0.263	0	5	GRIA4	Amacrine cells
CD24.5	0	1.18911	0.894	0.476	0	5	CD24	Amacrine cells
MLLT11.5	0	1.18704	0.876	0.511	0	5	MLLT11	Amacrine cells
NRXN2	0	1.18588	0.488	0.125	0	5	NRXN2	Amacrine cells
SYT6	0	1.16902	0.299	0.019	0	5	SYT6	Amacrine cells
LHFPL6	0	1.16824	0.341	0.071	0	5	LHFPL6	Amacrine cells
NBEA	0	1.16001	0.651	0.334	0	5	NBEA	Amacrine cells
FGF14	0	1.15488	0.343	0.038	0	5	FGF14	Amacrine cells
PKIA	0	1.14963	0.68	0.31	0	5	PKIA	Amacrine cells
GNG3.3	0	1.14853	0.625	0.205	0	5	GNG3	Amacrine cells
NSG2.4	1.63e-171	1.13138	0.479	0.253	4.2e-167	5	NSG2	Amacrine cells
C1QL2	0	1.12549	0.177	0.008	0	5	C1QL2	Amacrine cells
CRABP1.2	0	1.11648	0.993	0.893	0	5	CRABP1	Amacrine cells
MIR124-2HG.3	0	1.10567	0.655	0.284	0	5	MIR124-2HG	Amacrine cells
DPYSL2	0	1.09899	0.777	0.503	0	5	DPYSL2	Amacrine cells
SV2A	0	1.09658	0.481	0.149	0	5	SV2A	Amacrine cells
MAPT.4	0	1.09646	0.604	0.194	0	5	MAPT	Amacrine cells
DCC	0	1.09196	0.333	0.045	0	5	DCC	Amacrine cells
PCBP3	0	1.0913	0.545	0.207	0	5	PCBP3	Amacrine cells
PCDH7	1.96e-181	1.06617	0.378	0.171	5.05e-177	5	PCDH7	Amacrine cells
ADGRL3	0	1.06368	0.489	0.192	0	5	ADGRL3	Amacrine cells
SNTG1	0	1.06116	0.305	0.038	0	5	SNTG1	Amacrine cells
AP1S2	1.74e-221	1.05781	0.572	0.32	4.47e-217	5	AP1S2	Amacrine cells
KIDINS220	1.94e-298	1.05256	0.689	0.401	5.01e-294	5	KIDINS220	Amacrine cells
STMN2.5	0	1.0522	0.98	0.612	0	5	STMN2	Amacrine cells
POU2F2	0	1.04665	0.432	0.115	0	5	POU2F2	Amacrine cells
INA.4	0	1.04593	0.751	0.319	0	5	INA	Amacrine cells
STMN4.5	0	1.03585	0.709	0.297	0	5	STMN4	Amacrine cells
GABRA2	0	1.03225	0.278	0.033	0	5	GABRA2	Amacrine cells
NSG1.5	0	1.02754	0.723	0.247	0	5	NSG1	Amacrine cells
DLG2	0	1.02753	0.38	0.077	0	5	DLG2	Amacrine cells
CACNA1A	0	1.0262	0.378	0.107	0	5	CACNA1A	Amacrine cells
PTPRK	8.69e-294	1.02217	0.42	0.154	2.24e-289	5	PTPRK	Amacrine cells
CRMP1.5	0	1.02184	0.842	0.489	0	5	CRMP1	Amacrine cells
SH3BP5	0	1.01791	0.478	0.149	0	5	SH3BP5	Amacrine cells
NNAT	0	1.01506	0.941	0.792	0	5	NNAT	Amacrine cells
BASP1.5	0	0.995298	0.936	0.721	0	5	BASP1	Amacrine cells
CEP170	6.73e-282	0.991002	0.682	0.398	1.73e-277	5	CEP170	Amacrine cells
ADGRB3	0	0.982122	0.371	0.106	0	5	ADGRB3	Amacrine cells
FARP1	3.24e-189	0.980623	0.502	0.274	8.35e-185	5	FARP1	Amacrine cells
KHDRBS3	3.66e-190	0.974901	0.403	0.186	9.43e-186	5	KHDRBS3	Amacrine cells
ARHGEF12	0	0.972465	0.541	0.228	0	5	ARHGEF12	Amacrine cells
MAP2	8.49e-273	0.961967	0.713	0.443	2.19e-268	5	MAP2	Amacrine cells
LY6H	0	0.956909	0.425	0.135	0	5	LY6H	Amacrine cells
RGS8	0	0.956145	0.312	0.043	0	5	RGS8	Amacrine cells
AC024610.2	0	0.956099	0.258	0.015	0	5	AC024610.2	Amacrine cells
SLC32A1	0	0.955324	0.34	0.041	0	5	SLC32A1	Amacrine cells
NRP1	0	0.953912	0.389	0.105	0	5	NRP1	Amacrine cells
TBX3	9.09e-250	0.949989	0.283	0.082	2.34e-245	5	TBX3	Amacrine cells
APC	2.89e-250	0.949681	0.521	0.247	7.44e-246	5	APC	Amacrine cells
CELF5	0	0.943934	0.401	0.11	0	5	CELF5	Amacrine cells
SOX4.2	0	0.940581	0.998	0.972	0	5	SOX4	Amacrine cells
CEP126	6.5e-257	0.940102	0.443	0.182	1.67e-252	5	CEP126	Amacrine cells
PLPPR1	4.28e-291	0.935621	0.47	0.186	1.1e-286	5	PLPPR1	Amacrine cells
CSRNP3	1.14e-254	0.931365	0.594	0.311	2.93e-250	5	CSRNP3	Amacrine cells
TTC9B.1	0	0.922846	0.43	0.136	0	5	TTC9B	Amacrine cells
AUTS2	5.77e-247	0.921709	0.485	0.219	1.49e-242	5	AUTS2	Amacrine cells
IGFBP4	9.17e-249	0.918055	0.319	0.104	2.36e-244	5	IGFBP4	Amacrine cells
RAB3A	3.09e-292	0.907074	0.515	0.216	7.97e-288	5	RAB3A	Amacrine cells
C1QL1.1	6.51e-247	0.9064	0.311	0.095	1.68e-242	5	C1QL1	Amacrine cells
JPT1.5	0	0.900369	0.885	0.571	0	5	JPT1	Amacrine cells
NRXN3	9.89e-300	0.899137	0.394	0.128	2.55e-295	5	NRXN3	Amacrine cells
NTM.4	1.45e-295	0.898025	0.655	0.316	3.73e-291	5	NTM	Amacrine cells
MARCKSL1.1	0	0.896322	0.987	0.924	0	5	MARCKSL1	Amacrine cells
AL391650.1.1	1.79e-256	0.895944	0.65	0.347	4.61e-252	5	AL391650.1	Amacrine cells
NEGR1	0	0.892095	0.298	0.044	0	5	NEGR1	Amacrine cells
MYT1L	0	0.891065	0.361	0.086	0	5	MYT1L	Amacrine cells
ZBTB38.1	1.76e-286	0.885147	0.401	0.142	4.53e-282	5	ZBTB38	Amacrine cells
SOBP	0	0.883981	0.345	0.092	0	5	SOBP	Amacrine cells
FRMD4A	3.96e-199	0.877961	0.436	0.204	1.02e-194	5	FRMD4A	Amacrine cells
TTC3.1	0	0.877528	0.909	0.739	0	5	TTC3	Amacrine cells
SNAP25.4	3.37e-121	0.867059	0.555	0.349	8.67e-117	5	SNAP25	Amacrine cells
WIPF3	0	0.862392	0.238	0.017	0	5	WIPF3	Amacrine cells
APLP1.3	2.33e-241	0.859169	0.617	0.322	6.01e-237	5	APLP1	Amacrine cells
GPR85.1	0	0.85609	0.328	0.079	0	5	GPR85	Amacrine cells
IGLON5.1	2.35e-273	0.848581	0.439	0.169	6.06e-269	5	IGLON5	Amacrine cells
CADM2.2	9.04e-200	0.84695	0.689	0.436	2.33e-195	5	CADM2	Amacrine cells
SEZ6L2.3	4.79e-265	0.842542	0.635	0.317	1.23e-260	5	SEZ6L2	Amacrine cells
PEG3	6.54e-185	0.842246	0.359	0.152	1.68e-180	5	PEG3	Amacrine cells
DPYSL4	9.29e-183	0.827599	0.568	0.339	2.39e-178	5	DPYSL4	Amacrine cells
RASGEF1B	8.54e-197	0.827118	0.473	0.229	2.2e-192	5	RASGEF1B	Amacrine cells
PTPRD	3.64e-129	0.82157	0.396	0.212	9.37e-125	5	PTPRD	Amacrine cells
SLC38A1	7.39e-241	0.81731	0.485	0.215	1.9e-236	5	SLC38A1	Amacrine cells
BZW2	7.25e-218	0.817268	0.613	0.347	1.87e-213	5	BZW2	Amacrine cells
CACNB4	0	0.816403	0.284	0.049	0	5	CACNB4	Amacrine cells
VPS41	1.84e-138	0.816297	0.354	0.173	4.75e-134	5	VPS41	Amacrine cells
THRA	1.87e-198	0.815105	0.554	0.309	4.83e-194	5	THRA	Amacrine cells
NOVA1.1	5.67e-216	0.813647	0.622	0.356	1.46e-211	5	NOVA1	Amacrine cells
AC004158.1	0	0.81213	0.183	0.026	0	5	AC004158.1	Amacrine cells
MAB21L2.1	4.23e-156	0.811939	0.51	0.292	1.09e-151	5	MAB21L2	Amacrine cells
RIMS1	8.53e-87	0.809865	0.189	0.078	2.2e-82	5	RIMS1	Amacrine cells
KCNC1	0	0.801729	0.284	0.048	0	5	KCNC1	Amacrine cells
GNG2	1.31e-263	0.800446	0.374	0.13	3.36e-259	5	GNG2	Amacrine cells
CRIM1	1.66e-121	0.796347	0.277	0.123	4.26e-117	5	CRIM1	Amacrine cells
SBK1	9.62e-204	0.793639	0.478	0.232	2.48e-199	5	SBK1	Amacrine cells
MAP6	1.59e-183	0.793448	0.557	0.316	4.1e-179	5	MAP6	Amacrine cells
CCNI.1	0	0.791509	0.957	0.894	0	5	CCNI	Amacrine cells
ESRRG	3.95e-41	0.780525	0.259	0.17	1.02e-36	5	ESRRG	Amacrine cells
FIBCD1	0	0.779406	0.19	0.033	0	5	FIBCD1	Amacrine cells
AC245297.3	7.12e-303	0.779157	0.317	0.087	1.83e-298	5	AC245297.3	Amacrine cells
SEMA6A.1	1.12e-108	0.774309	0.408	0.239	2.89e-104	5	SEMA6A	Amacrine cells
SCRT2.1	9.61e-284	0.769699	0.312	0.089	2.48e-279	5	SCRT2	Amacrine cells
APBB2.1	2.33e-227	0.769621	0.357	0.13	6.01e-223	5	APBB2	Amacrine cells
DPF3	1.81e-256	0.768953	0.291	0.086	4.67e-252	5	DPF3	Amacrine cells
NETO2	2.84e-183	0.767573	0.265	0.091	7.32e-179	5	NETO2	Amacrine cells
SRGAP3.1	7.01e-184	0.767125	0.705	0.486	1.81e-179	5	SRGAP3	Amacrine cells
ARHGEF4	3.86e-213	0.765898	0.252	0.075	9.95e-209	5	ARHGEF4	Amacrine cells
BARHL2.1	2.99e-238	0.763034	0.307	0.095	7.71e-234	5	BARHL2	Amacrine cells
MAPK10.1	9.18e-165	0.762909	0.567	0.341	2.36e-160	5	MAPK10	Amacrine cells
TCEAL2	4.45e-194	0.762345	0.507	0.261	1.15e-189	5	TCEAL2	Amacrine cells
ABLIM1	2.45e-151	0.761906	0.33	0.145	6.32e-147	5	ABLIM1	Amacrine cells
GAS7	9.16e-281	0.752262	0.231	0.052	2.36e-276	5	GAS7	Amacrine cells
EEF1B2	1.08e-191	0.750275	0.841	0.706	2.79e-187	5	EEF1B2	Amacrine cells
AC027031.2	1.15e-144	0.749713	0.345	0.155	2.97e-140	5	AC027031.2	Amacrine cells
NPTX2	1.86e-161	0.749038	0.234	0.079	4.8e-157	5	NPTX2	Amacrine cells
CD200	1.32e-185	0.745572	0.39	0.171	3.41e-181	5	CD200	Amacrine cells
TMEM132A	9.98e-161	0.74461	0.542	0.318	2.57e-156	5	TMEM132A	Amacrine cells
CFL1	0	0.743691	0.956	0.891	0	5	CFL1	Amacrine cells
PLXNA2.1	5.61e-240	0.742768	0.269	0.075	1.45e-235	5	PLXNA2	Amacrine cells
LRRN3	1.57e-72	0.742695	0.405	0.265	4.06e-68	5	LRRN3	Amacrine cells
TCEAL5	3.82e-191	0.735396	0.364	0.15	9.83e-187	5	TCEAL5	Amacrine cells
DPYSL3	1.78e-189	0.7318	0.428	0.191	4.58e-185	5	DPYSL3	Amacrine cells
CCDC88A	1.81e-158	0.731732	0.776	0.616	4.66e-154	5	CCDC88A	Amacrine cells
GABRG2	0	0.731698	0.26	0.055	0	5	GABRG2	Amacrine cells
SPOCK3	0	0.731055	0.192	0.031	0	5	SPOCK3	Amacrine cells
TERF2IP	1.07e-244	0.730785	0.865	0.69	2.77e-240	5	TERF2IP	Amacrine cells
HSPA12A	4.12e-232	0.730308	0.258	0.074	1.06e-227	5	HSPA12A	Amacrine cells
SNCB	0	0.728107	0.233	0.039	0	5	SNCB	Amacrine cells
MAGI2.1	3.12e-160	0.723338	0.345	0.15	8.04e-156	5	MAGI2	Amacrine cells
VAMP2	2.1e-212	0.722864	0.853	0.712	5.41e-208	5	VAMP2	Amacrine cells
LUC7L3	1.25e-207	0.721631	0.867	0.751	3.21e-203	5	LUC7L3	Amacrine cells
ASXL3	1.03e-307	0.72071	0.291	0.074	2.64e-303	5	ASXL3	Amacrine cells
CHD3	7.25e-154	0.719854	0.389	0.189	1.87e-149	5	CHD3	Amacrine cells
SCN3A	1.16e-259	0.717006	0.293	0.084	3e-255	5	SCN3A	Amacrine cells
NLGN4X	5.59e-87	0.713196	0.266	0.133	1.44e-82	5	NLGN4X	Amacrine cells
CDH8	0	0.711237	0.168	0.018	0	5	CDH8	Amacrine cells
POU6F2	6.17e-178	0.706687	0.224	0.068	1.59e-173	5	POU6F2	Amacrine cells
CACNA1D	0	0.705428	0.231	0.027	0	5	CACNA1D	Amacrine cells
CAMKV	0	0.705347	0.214	0.023	0	5	CAMKV	Amacrine cells
PARD3	5.15e-86	0.704387	0.337	0.193	1.33e-81	5	PARD3	Amacrine cells
XIST	4.1e-34	0.703797	0.468	0.397	1.06e-29	5	XIST	Amacrine cells
NRIP1	3.62e-84	0.703696	0.451	0.304	9.33e-80	5	NRIP1	Amacrine cells
EVL.1	2.36e-139	0.703694	0.61	0.41	6.09e-135	5	EVL	Amacrine cells
PAPPA	0	0.703275	0.191	0.016	0	5	PAPPA	Amacrine cells
SRRM4.4	1.77e-138	0.702361	0.54	0.32	4.55e-134	5	SRRM4	Amacrine cells
RCN1	1.74e-129	-0.705432	0.205	0.478	4.48e-125	5	RCN1	Amacrine cells
TCF7L2	1.01e-128	-0.706012	0.039	0.272	2.61e-124	5	TCF7L2	Amacrine cells
MT-CYB.2	5.14e-150	-0.706304	0.914	0.933	1.32e-145	5	MT-CYB	Amacrine cells
CRYBG3.1	7.37e-101	-0.709545	0.015	0.196	1.9e-96	5	CRYBG3	Amacrine cells
BSG.1	6.91e-125	-0.709671	0.625	0.773	1.78e-120	5	BSG	Amacrine cells
ANKRD33B.1	3.65e-78	-0.709773	0.022	0.17	9.39e-74	5	ANKRD33B	Amacrine cells
SLC2A1.1	3.13e-118	-0.710254	0.28	0.537	8.06e-114	5	SLC2A1	Amacrine cells
IMPG2.5	1.85e-69	-0.710628	0.027	0.165	4.77e-65	5	IMPG2	Amacrine cells
SLC38A5.5	2.27e-79	-0.713015	0.021	0.172	5.84e-75	5	SLC38A5	Amacrine cells
NELL2	2.43e-138	-0.713724	0.098	0.366	6.27e-134	5	NELL2	Amacrine cells
GADD45A	1.24e-69	-0.719398	0.107	0.275	3.19e-65	5	GADD45A	Amacrine cells
BAMBI.3	5.44e-82	-0.720399	0.109	0.295	1.4e-77	5	BAMBI	Amacrine cells
PRSS23.1	4.54e-111	-0.724536	0.019	0.215	1.17e-106	5	PRSS23	Amacrine cells
SLC16A1.1	4.67e-118	-0.727311	0.102	0.339	1.2e-113	5	SLC16A1	Amacrine cells
COL2A1.3	3.9e-108	-0.72865	0.026	0.223	1e-103	5	COL2A1	Amacrine cells
DNAJB1	9.42e-30	-0.729344	0.307	0.42	2.43e-25	5	DNAJB1	Amacrine cells
ITGB8	6.03e-136	-0.729734	0.027	0.264	1.55e-131	5	ITGB8	Amacrine cells
RPS6	0	-0.730217	0.966	0.989	0	5	RPS6	Amacrine cells
KDR.4	4.23e-104	-0.734934	0.02	0.208	1.09e-99	5	KDR	Amacrine cells
CLGN	2.65e-130	-0.740887	0.049	0.285	6.84e-126	5	CLGN	Amacrine cells
STON2.3	2.81e-125	-0.74396	0.098	0.344	7.25e-121	5	STON2	Amacrine cells
H2AFZ.1	1.41e-155	-0.744996	0.777	0.87	3.64e-151	5	H2AFZ	Amacrine cells
TMX1.2	2.16e-111	-0.749649	0.141	0.374	5.56e-107	5	TMX1	Amacrine cells
CCDC181.2	2.25e-116	-0.752146	0.081	0.311	5.8e-112	5	CCDC181	Amacrine cells
PRDX6	1.95e-147	-0.754349	0.189	0.476	5.03e-143	5	PRDX6	Amacrine cells
H2AFV	2.33e-139	-0.755225	0.312	0.581	6.01e-135	5	H2AFV	Amacrine cells
CHRNA3.5	9.66e-95	-0.75539	0.062	0.252	2.49e-90	5	CHRNA3	Amacrine cells
CST3	3.57e-141	-0.760847	0.166	0.446	9.2e-137	5	CST3	Amacrine cells
METRN.4	2.59e-78	-0.76535	0.163	0.351	6.66e-74	5	METRN	Amacrine cells
FSTL5.4	2.49e-77	-0.765763	0.063	0.227	6.41e-73	5	FSTL5	Amacrine cells
SIX6	5.5e-154	-0.766026	0.399	0.674	1.42e-149	5	SIX6	Amacrine cells
RPS7	0	-0.766211	0.969	0.988	0	5	RPS7	Amacrine cells
ODC1.1	2.2e-137	-0.767242	0.309	0.575	5.66e-133	5	ODC1	Amacrine cells
LMAN1.1	1.64e-143	-0.768046	0.209	0.491	4.22e-139	5	LMAN1	Amacrine cells
BAZ2B.1	1.51e-117	-0.770993	0.389	0.621	3.88e-113	5	BAZ2B	Amacrine cells
2004-09-01	2.03e-120	-0.771082	0.052	0.276	5.23e-116	5	2004-09-01	Amacrine cells
PGRMC2.2	3.85e-115	-0.775099	0.174	0.416	9.92e-111	5	PGRMC2	Amacrine cells
TPPP3	2.72e-140	-0.783342	0.033	0.275	7.01e-136	5	TPPP3	Amacrine cells
SMIM20.2	3.1e-141	-0.787706	0.117	0.389	8e-137	5	SMIM20	Amacrine cells
RARRES2.1	1.77e-125	-0.788722	0.035	0.261	4.55e-121	5	RARRES2	Amacrine cells
CREB5.2	9.39e-119	-0.790309	0.017	0.222	2.42e-114	5	CREB5	Amacrine cells
VSX2.1	1.78e-133	-0.792435	0.034	0.271	4.58e-129	5	VSX2	Amacrine cells
SNCG.3	3.26e-30	-0.802505	0.113	0.21	8.41e-26	5	SNCG	Amacrine cells
JUNB.2	1.37e-73	-0.803814	0.282	0.466	3.52e-69	5	JUNB	Amacrine cells
CLIC1.1	7.02e-164	-0.804343	0.045	0.324	1.81e-159	5	CLIC1	Amacrine cells
MCAM.3	9.03e-111	-0.804632	0.011	0.202	2.33e-106	5	MCAM	Amacrine cells
SRI	3.16e-175	-0.807784	0.159	0.477	8.14e-171	5	SRI	Amacrine cells
UBE2C.4	5.67e-45	-0.809166	0.027	0.125	1.46e-40	5	UBE2C	Amacrine cells
PTTG1.2	2.51e-59	-0.810902	0.038	0.166	6.47e-55	5	PTTG1	Amacrine cells
SMC4.1	1.43e-83	-0.814627	0.071	0.249	3.68e-79	5	SMC4	Amacrine cells
RXRG.5	1.19e-99	-0.825065	0.033	0.22	3.07e-95	5	RXRG	Amacrine cells
CRNDE.1	1.9e-164	-0.826752	0.039	0.316	4.9e-160	5	CRNDE	Amacrine cells
ILDR2.3	2.15e-135	-0.828466	0.058	0.303	5.54e-131	5	ILDR2	Amacrine cells
NUSAP1.2	3.3e-59	-0.832272	0.027	0.149	8.5e-55	5	NUSAP1	Amacrine cells
LIMCH1.4	1.29e-139	-0.836123	0.032	0.274	3.32e-135	5	LIMCH1	Amacrine cells
ANXA5.1	1.15e-169	-0.840001	0.071	0.362	2.95e-165	5	ANXA5	Amacrine cells
PLEKHB1.1	3.19e-138	-0.840809	0.023	0.258	8.22e-134	5	PLEKHB1	Amacrine cells
GNAI2.1	5.37e-150	-0.842269	0.211	0.492	1.38e-145	5	GNAI2	Amacrine cells
TULP1.5	1.31e-96	-0.846596	0.02	0.195	3.37e-92	5	TULP1	Amacrine cells
ZIC2	3.19e-159	-0.847206	0.138	0.435	8.21e-155	5	ZIC2	Amacrine cells
TYMS.2	1.43e-84	-0.847439	0.102	0.286	3.68e-80	5	TYMS	Amacrine cells
ATP1B2.3	1.2e-80	-0.860717	0.255	0.441	3.1e-76	5	ATP1B2	Amacrine cells
QDPR.4	4.77e-102	-0.86614	0.176	0.397	1.23e-97	5	QDPR	Amacrine cells
MYB.4	3.93e-143	-0.869755	0.045	0.297	1.01e-138	5	MYB	Amacrine cells
LINC01833.2	1.97e-157	-0.871748	0.114	0.406	5.06e-153	5	LINC01833	Amacrine cells
GATB.4	6.96e-127	-0.875701	0.08	0.32	1.79e-122	5	GATB	Amacrine cells
DBI.2	1.24e-156	-0.884647	0.318	0.593	3.2e-152	5	DBI	Amacrine cells
CKS2.1	1.81e-105	-0.886445	0.102	0.32	4.66e-101	5	CKS2	Amacrine cells
MSI1.1	1.69e-166	-0.887845	0.232	0.531	4.35e-162	5	MSI1	Amacrine cells
BTG3	6.4e-180	-0.88929	0.06	0.358	1.65e-175	5	BTG3	Amacrine cells
NOTCH1.2	3.81e-168	-0.893196	0.027	0.303	9.81e-164	5	NOTCH1	Amacrine cells
PLP1.5	3.16e-118	-0.89687	0.032	0.244	8.15e-114	5	PLP1	Amacrine cells
RAX2.5	6.96e-78	-0.899521	0.028	0.179	1.79e-73	5	RAX2	Amacrine cells
B2M.1	1.48e-131	-0.9007	0.063	0.308	3.82e-127	5	B2M	Amacrine cells
DEK.1	5.42e-153	-0.902447	0.423	0.67	1.4e-148	5	DEK	Amacrine cells
HMGN2.1	7.26e-171	-0.911985	0.767	0.866	1.87e-166	5	HMGN2	Amacrine cells
TAGLN2.1	2.25e-181	-0.927932	0.048	0.346	5.79e-177	5	TAGLN2	Amacrine cells
PIK3R1.2	2.89e-98	-0.939072	0.264	0.477	7.45e-94	5	PIK3R1	Amacrine cells
MYO10.4	1.4e-160	-0.964148	0.062	0.341	3.6e-156	5	MYO10	Amacrine cells
PRPH.5	8.38e-31	-0.965007	0.04	0.12	2.16e-26	5	PRPH	Amacrine cells
JUND.2	3.54e-141	-0.970152	0.653	0.811	9.13e-137	5	JUND	Amacrine cells
GAS1.5	1.63e-112	-0.971313	0.057	0.27	4.21e-108	5	GAS1	Amacrine cells
CMTM6.2	8.72e-191	-0.97549	0.082	0.399	2.25e-186	5	CMTM6	Amacrine cells
NES.3	3.32e-154	-0.976826	0.049	0.313	8.54e-150	5	NES	Amacrine cells
C1orf61.5	2.18e-78	-0.979526	0.077	0.245	5.61e-74	5	C1orf61	Amacrine cells
SOX9.5	1.2e-118	-0.985757	0.178	0.414	3.09e-114	5	SOX9	Amacrine cells
FAM161A.5	2.75e-102	-0.990424	0.169	0.384	7.1e-98	5	FAM161A	Amacrine cells
HSPB1	7.31e-127	-1.00113	0.166	0.421	1.88e-122	5	HSPB1	Amacrine cells
TMEM123.1	3.36e-218	-1.00914	0.047	0.388	8.64e-214	5	TMEM123	Amacrine cells
PRDX1.1	1.26e-205	-1.01406	0.424	0.694	3.24e-201	5	PRDX1	Amacrine cells
PRSS35.5	3.6e-122	-1.02485	0.017	0.228	9.28e-118	5	PRSS35	Amacrine cells
ATOH7.4	7.7e-37	-1.02802	0.021	0.101	1.98e-32	5	ATOH7	Amacrine cells
AMER2.4	1.02e-84	-1.03311	0.363	0.536	2.62e-80	5	AMER2	Amacrine cells
MDK.1	1.47e-110	-1.03383	0.404	0.589	3.8e-106	5	MDK	Amacrine cells
TOP2A.5	2.81e-44	-1.04284	0.053	0.16	7.25e-40	5	TOP2A	Amacrine cells
PRDM1.5	8.69e-100	-1.04477	0.023	0.202	2.24e-95	5	PRDM1	Amacrine cells
LGI4.1	4.9e-181	-1.04642	0.035	0.326	1.26e-176	5	LGI4	Amacrine cells
GPM6B.4	1.72e-166	-1.04831	0.292	0.576	4.44e-162	5	GPM6B	Amacrine cells
CDKN1C.1	1.41e-157	-1.05647	0.135	0.424	3.64e-153	5	CDKN1C	Amacrine cells
EGR1.4	1.67e-95	-1.06444	0.11	0.31	4.3e-91	5	EGR1	Amacrine cells
LOXL1.5	1.3e-141	-1.0673	0.038	0.281	3.34e-137	5	LOXL1	Amacrine cells
CENPF.5	1.22e-41	-1.08787	0.049	0.149	3.14e-37	5	CENPF	Amacrine cells
AL139246.5.4	4.64e-115	-1.09385	0.041	0.251	1.19e-110	5	AL139246.5	Amacrine cells
CRX.5	2.03e-124	-1.11807	0.031	0.247	5.23e-120	5	CRX	Amacrine cells
DAPL1.2	5.26e-184	-1.11944	0.166	0.485	1.35e-179	5	DAPL1	Amacrine cells
FXYD1.3	1.02e-220	-1.14995	0.057	0.4	2.62e-216	5	FXYD1	Amacrine cells
RP1.5	1.97e-83	-1.15051	0.028	0.186	5.06e-79	5	RP1	Amacrine cells
RASD1.2	8.36e-130	-1.15195	0.064	0.3	2.15e-125	5	RASD1	Amacrine cells
PMEPA1.5	6.25e-184	-1.16494	0.235	0.542	1.61e-179	5	PMEPA1	Amacrine cells
CSRP2.2	5.09e-197	-1.16863	0.186	0.514	1.31e-192	5	CSRP2	Amacrine cells
HIST1H1C.3	1.7e-144	-1.17642	0.098	0.358	4.38e-140	5	HIST1H1C	Amacrine cells
NFIB.1	6.37e-178	-1.18726	0.046	0.335	1.64e-173	5	NFIB	Amacrine cells
DUSP1.2	2.44e-157	-1.19852	0.426	0.661	6.29e-153	5	DUSP1	Amacrine cells
CNN3.3	4e-274	-1.20358	0.151	0.547	1.03e-269	5	CNN3	Amacrine cells
MEST.4	8.82e-198	-1.20545	0.246	0.56	2.27e-193	5	MEST	Amacrine cells
SSX2IP.2	5.21e-207	-1.21735	0.039	0.36	1.34e-202	5	SSX2IP	Amacrine cells
NR2E3.5	6.99e-94	-1.26563	0.022	0.192	1.8e-89	5	NR2E3	Amacrine cells
CXCR4.3	1.24e-211	-1.27212	0.055	0.382	3.19e-207	5	CXCR4	Amacrine cells
CKB.1	0	-1.27409	0.974	0.982	0	5	CKB	Amacrine cells
EPB41L2.2	6.19e-198	-1.27811	0.057	0.368	1.59e-193	5	EPB41L2	Amacrine cells
DCT.5	1.05e-71	-1.29534	0.031	0.173	2.69e-67	5	DCT	Amacrine cells
SELENOP.4	3.53e-238	-1.29858	0.053	0.408	9.08e-234	5	SELENOP	Amacrine cells
PCBP4.4	2.63e-150	-1.31464	0.317	0.545	6.77e-146	5	PCBP4	Amacrine cells
RGS16.1	6.94e-132	-1.31575	0.261	0.503	1.79e-127	5	RGS16	Amacrine cells
IER2.3	1.34e-249	-1.32611	0.286	0.627	3.45e-245	5	IER2	Amacrine cells
CRABP2.5	6.12e-107	-1.35528	0.072	0.278	1.58e-102	5	CRABP2	Amacrine cells
BTG2.3	1.62e-212	-1.37334	0.133	0.466	4.17e-208	5	BTG2	Amacrine cells
TUBA1B.2	2.32e-240	-1.38241	0.678	0.83	5.98e-236	5	TUBA1B	Amacrine cells
CLU.5	7.48e-218	-1.38293	0.282	0.594	1.93e-213	5	CLU	Amacrine cells
GSTP1.2	0	-1.4024	0.476	0.806	0	5	GSTP1	Amacrine cells
ID3.4	3.61e-136	-1.41435	0.095	0.346	9.31e-132	5	ID3	Amacrine cells
FOS.4	1.33e-131	-1.43692	0.55	0.713	3.42e-127	5	FOS	Amacrine cells
AL451062.1.5	1.37e-97	-1.4383	0.048	0.232	3.52e-93	5	AL451062.1	Amacrine cells
TUBB4B.5	2.01e-249	-1.4496	0.423	0.695	5.17e-245	5	TUBB4B	Amacrine cells
GNG5.1	0	-1.48656	0.119	0.625	0	5	GNG5	Amacrine cells
GADD45G.5	3.55e-150	-1.4955	0.216	0.471	9.14e-146	5	GADD45G	Amacrine cells
HES6.2	4.43e-188	-1.52859	0.248	0.544	1.14e-183	5	HES6	Amacrine cells
ROM1.5	4.35e-112	-1.53173	0.05	0.254	1.12e-107	5	ROM1	Amacrine cells
HES4.5	1.5e-252	-1.54578	0.149	0.517	3.86e-248	5	HES4	Amacrine cells
TCF4.4	0	-1.575	0.167	0.61	0	5	TCF4	Amacrine cells
TF.5	4.47e-134	-1.61871	0.065	0.304	1.15e-129	5	TF	Amacrine cells
JUN.3	0	-1.64741	0.478	0.807	0	5	JUN	Amacrine cells
CYR61.4	3.05e-186	-1.67683	0.042	0.333	7.86e-182	5	CYR61	Amacrine cells
ASCL1.4	1.37e-247	-1.69532	0.08	0.442	3.54e-243	5	ASCL1	Amacrine cells
SAT1.5	2.58e-182	-1.7198	0.178	0.483	6.64e-178	5	SAT1	Amacrine cells
RAX.1	0	-1.72178	0.071	0.557	0	5	RAX	Amacrine cells
SOX2.5	0	-1.73982	0.147	0.578	0	5	SOX2	Amacrine cells
HMGB2.2	7.99e-268	-1.74505	0.231	0.607	2.06e-263	5	HMGB2	Amacrine cells
TTYH1.5	0	-1.74912	0.117	0.537	0	5	TTYH1	Amacrine cells
ID1.3	1.46e-299	-1.76001	0.098	0.502	3.76e-295	5	ID1	Amacrine cells
NEUROD4.5	2.97e-169	-1.79109	0.086	0.362	7.66e-165	5	NEUROD4	Amacrine cells
ZFP36L1.5	1.42e-278	-1.81781	0.089	0.476	3.65e-274	5	ZFP36L1	Amacrine cells
SFRP2.5	3.5e-263	-1.85589	0.059	0.434	9.01e-259	5	SFRP2	Amacrine cells
PDC.5	9.92e-104	-1.85785	0.083	0.278	2.56e-99	5	PDC	Amacrine cells
OTX2.5	1.74e-185	-1.90974	0.097	0.387	4.47e-181	5	OTX2	Amacrine cells
NEUROD1.5	9.97e-164	-1.93914	0.169	0.436	2.57e-159	5	NEUROD1	Amacrine cells
GNB3.5	2.05e-125	-1.97867	0.143	0.363	5.28e-121	5	GNB3	Amacrine cells
AIPL1.5	1.69e-113	-2.01616	0.102	0.311	4.36e-109	5	AIPL1	Amacrine cells
SPP1.5	0	-2.06425	0.142	0.565	0	5	SPP1	Amacrine cells
VIM.5	0	-2.24618	0.564	0.829	0	5	VIM	Amacrine cells
FABP7.3	5.3e-261	-2.35593	0.334	0.651	1.37e-256	5	FABP7	Amacrine cells
HES5.5	9.05e-182	-2.36081	0.098	0.39	2.33e-177	5	HES5	Amacrine cells
CCND1.5	4.27e-301	-2.4075	0.199	0.577	1.1e-296	5	CCND1	Amacrine cells
ZFP36L2.4	0	-2.50902	0.11	0.638	0	5	ZFP36L2	Amacrine cells
NRL.5	1.01e-121	-2.57607	0.199	0.413	2.59e-117	5	NRL	Amacrine cells
HES1.5	2.79e-255	-2.58615	0.126	0.481	7.18e-251	5	HES1	Amacrine cells
RCVRN.5	1.18e-105	-2.86204	0.252	0.433	3.04e-101	5	RCVRN	Amacrine cells
RCVRN.6	0	2.8817	0.999	0.399	0	6	RCVRN	Rod photoreceptors
NRL.6	0	2.87043	0.98	0.378	0	6	NRL	Rod photoreceptors
PDC.6	0	2.67264	0.952	0.238	0	6	PDC	Rod photoreceptors
AIPL1.6	0	2.62923	0.99	0.271	0	6	AIPL1	Rod photoreceptors
ROM1.6	0	2.54324	0.93	0.214	0	6	ROM1	Rod photoreceptors
RP1.6	0	2.5099	0.854	0.149	0	6	RP1	Rod photoreceptors
NR2E3.6	0	2.48141	0.909	0.152	0	6	NR2E3	Rod photoreceptors
GNGT1	0	2.33805	0.267	0.02	0	6	GNGT1	Rod photoreceptors
GNB3.6	0	2.25893	0.989	0.324	0	6	GNB3	Rod photoreceptors
RAX2.6	0	2.16616	0.804	0.143	0	6	RAX2	Rod photoreceptors
AL451062.1.6	0	2.16173	0.854	0.196	0	6	AL451062.1	Rod photoreceptors
GNAT1.1	0	2.15986	0.642	0.082	0	6	GNAT1	Rod photoreceptors
ARL4D.2	0	2.08926	0.771	0.254	0	6	ARL4D	Rod photoreceptors
NEUROD1.6	0	1.98329	0.98	0.399	0	6	NEUROD1	Rod photoreceptors
UNC119.4	0	1.87828	0.814	0.296	0	6	UNC119	Rod photoreceptors
SAMD11.4	0	1.85109	0.829	0.273	0	6	SAMD11	Rod photoreceptors
CRX.6	0	1.8142	0.841	0.211	0	6	CRX	Rod photoreceptors
EPB41L2.3	0	1.78144	0.87	0.331	0	6	EPB41L2	Rod photoreceptors
FAM161A.6	0	1.78035	0.871	0.352	0	6	FAM161A	Rod photoreceptors
CABP5.1	0	1.77348	0.554	0.071	0	6	CABP5	Rod photoreceptors
GADD45G.6	0	1.72872	0.95	0.438	0	6	GADD45G	Rod photoreceptors
ATP1B2.4	0	1.71633	0.913	0.411	0	6	ATP1B2	Rod photoreceptors
NTM.5	0	1.69512	0.837	0.309	0	6	NTM	Rod photoreceptors
KCNV2.1	0	1.63306	0.576	0.092	0	6	KCNV2	Rod photoreceptors
OTX2.6	0	1.63275	0.945	0.348	0	6	OTX2	Rod photoreceptors
BTBD8.3	0	1.60425	0.75	0.246	0	6	BTBD8	Rod photoreceptors
IMPG2.6	0	1.59477	0.72	0.133	0	6	IMPG2	Rod photoreceptors
RBP3.1	0	1.58411	0.636	0.114	0	6	RBP3	Rod photoreceptors
GNGT2.1	0	1.55172	0.577	0.089	0	6	GNGT2	Rod photoreceptors
TULP1.6	0	1.54708	0.75	0.162	0	6	TULP1	Rod photoreceptors
EPS8.1	0	1.53606	0.681	0.155	0	6	EPS8	Rod photoreceptors
LOXL1.6	0	1.53073	0.715	0.25	0	6	LOXL1	Rod photoreceptors
AMER2.5	0	1.51784	0.919	0.51	0	6	AMER2	Rod photoreceptors
MRLN.1	0	1.50404	0.663	0.123	0	6	MRLN	Rod photoreceptors
CRABP2.6	0	1.49105	0.7	0.25	0	6	CRABP2	Rod photoreceptors
MAK.1	0	1.47396	0.624	0.101	0	6	MAK	Rod photoreceptors
ANKRD33B.2	0	1.4722	0.655	0.141	0	6	ANKRD33B	Rod photoreceptors
PTPN13.1	0	1.46793	0.672	0.177	0	6	PTPN13	Rod photoreceptors
HIST1H1C.4	0	1.46223	0.758	0.327	0	6	HIST1H1C	Rod photoreceptors
STX3.1	0	1.46191	0.687	0.151	0	6	STX3	Rod photoreceptors
TMEM91.1	0	1.46062	0.651	0.163	0	6	TMEM91	Rod photoreceptors
CPE.4	0	1.45588	0.912	0.541	0	6	CPE	Rod photoreceptors
MARCH1.1	0	1.44335	0.67	0.175	0	6	2001-03-01	Rod photoreceptors
TMEM244.1	0	1.43463	0.598	0.102	0	6	TMEM244	Rod photoreceptors
MPP4.1	0	1.43328	0.502	0.08	0	6	MPP4	Rod photoreceptors
PCBP4.5	0	1.42571	0.95	0.516	0	6	PCBP4	Rod photoreceptors
CNGB1.1	0	1.40479	0.446	0.053	0	6	CNGB1	Rod photoreceptors
CNGA1	0	1.39806	0.248	0.017	0	6	CNGA1	Rod photoreceptors
IMPG1.1	0	1.39671	0.423	0.059	0	6	IMPG1	Rod photoreceptors
MYO9A.1	0	1.38275	0.636	0.196	0	6	MYO9A	Rod photoreceptors
TUBB4B.6	0	1.33397	0.949	0.671	0	6	TUBB4B	Rod photoreceptors
SLC6A17.1	0	1.33126	0.526	0.084	0	6	SLC6A17	Rod photoreceptors
FSTL5.5	0	1.29863	0.705	0.197	0	6	FSTL5	Rod photoreceptors
UBXN4.1	0	1.29259	0.895	0.582	0	6	UBXN4	Rod photoreceptors
LINC00599.4	0	1.29208	0.79	0.323	0	6	LINC00599	Rod photoreceptors
GPR160.1	0	1.28238	0.417	0.042	0	6	GPR160	Rod photoreceptors
SLC40A1.1	0	1.27642	0.535	0.122	0	6	SLC40A1	Rod photoreceptors
CHRNA3.6	0	1.27244	0.684	0.224	0	6	CHRNA3	Rod photoreceptors
SLC38A5.6	0	1.27004	0.631	0.144	0	6	SLC38A5	Rod photoreceptors
SLC1A7.5	0	1.26598	0.651	0.16	0	6	SLC1A7	Rod photoreceptors
MATK.1	0	1.23987	0.489	0.083	0	6	MATK	Rod photoreceptors
PDE6G	0	1.23913	0.324	0.032	0	6	PDE6G	Rod photoreceptors
PTP4A3.1	0	1.23203	0.616	0.178	0	6	PTP4A3	Rod photoreceptors
PIK3R1.3	0	1.23092	0.846	0.451	0	6	PIK3R1	Rod photoreceptors
NIPAL1.1	0	1.20237	0.421	0.053	0	6	NIPAL1	Rod photoreceptors
PDE6B.1	0	1.19649	0.518	0.107	0	6	PDE6B	Rod photoreceptors
RIMS2.1	0	1.19295	0.561	0.187	0	6	RIMS2	Rod photoreceptors
SYP.4	0	1.16277	0.785	0.367	0	6	SYP	Rod photoreceptors
LAPTM4B.1	0	1.15714	0.806	0.469	0	6	LAPTM4B	Rod photoreceptors
PRDM1.6	0	1.15572	0.645	0.174	0	6	PRDM1	Rod photoreceptors
PDE4DIP.1	0	1.14966	0.537	0.176	0	6	PDE4DIP	Rod photoreceptors
ISOC1.1	0	1.14914	0.56	0.194	0	6	ISOC1	Rod photoreceptors
SAG	0	1.136	0.148	0.008	0	6	SAG	Rod photoreceptors
RALGPS2.1	0	1.13241	0.635	0.25	0	6	RALGPS2	Rod photoreceptors
EYS.1	0	1.1232	0.462	0.077	0	6	EYS	Rod photoreceptors
GSTP1.3	0	1.12163	0.964	0.783	0	6	GSTP1	Rod photoreceptors
SLC17A7.1	0	1.09982	0.55	0.133	0	6	SLC17A7	Rod photoreceptors
PRDX1.2	0	1.09762	0.908	0.672	0	6	PRDX1	Rod photoreceptors
MAP1LC3B.1	0	1.09626	0.854	0.549	0	6	MAP1LC3B	Rod photoreceptors
CDKN1C.2	6.39e-294	1.09411	0.715	0.397	1.65e-289	6	CDKN1C	Rod photoreceptors
CCDC181.3	0	1.08993	0.673	0.283	0	6	CCDC181	Rod photoreceptors
ADGRV1.1	0	1.07952	0.542	0.155	0	6	ADGRV1	Rod photoreceptors
REEP6.1	0	1.07591	0.456	0.104	0	6	REEP6	Rod photoreceptors
YPEL2.2	0	1.04339	0.574	0.2	0	6	YPEL2	Rod photoreceptors
NEUROD4.6	0	1.03457	0.838	0.328	0	6	NEUROD4	Rod photoreceptors
PRPH2.1	0	1.03056	0.408	0.064	0	6	PRPH2	Rod photoreceptors
BAZ2B.2	0	1.0305	0.861	0.599	0	6	BAZ2B	Rod photoreceptors
SNAP25.5	0	1.02314	0.733	0.342	0	6	SNAP25	Rod photoreceptors
AANAT.1	0	1.00778	0.47	0.114	0	6	AANAT	Rod photoreceptors
SSX2IP.3	0	0.980856	0.697	0.33	0	6	SSX2IP	Rod photoreceptors
CDHR1	0	0.980136	0.431	0.091	0	6	CDHR1	Rod photoreceptors
ARL6.1	0	0.973989	0.466	0.128	0	6	ARL6	Rod photoreceptors
AKAP9	1.01e-297	0.969777	0.82	0.542	2.6e-293	6	AKAP9	Rod photoreceptors
PLEKHB1.2	6.07e-260	0.967673	0.542	0.234	1.56e-255	6	PLEKHB1	Rod photoreceptors
ZNF385B.1	0	0.964866	0.469	0.108	0	6	ZNF385B	Rod photoreceptors
ITSN1	2.47e-302	0.963304	0.571	0.247	6.37e-298	6	ITSN1	Rod photoreceptors
TLE3.2	1.31e-230	0.937384	0.584	0.293	3.37e-226	6	TLE3	Rod photoreceptors
CKAP4	1.84e-241	0.934174	0.647	0.364	4.74e-237	6	CKAP4	Rod photoreceptors
BCL2L1.1	0	0.930469	0.514	0.18	0	6	BCL2L1	Rod photoreceptors
SEPT4.1	1.81e-298	0.928878	0.591	0.252	4.67e-294	6	2004-09-01	Rod photoreceptors
SELENOK	3.35e-159	0.926151	0.689	0.486	8.62e-155	6	SELENOK	Rod photoreceptors
CADM2.3	2.04e-297	0.924167	0.766	0.433	5.26e-293	6	CADM2	Rod photoreceptors
PPFIA2.1	0	0.920626	0.558	0.221	0	6	PPFIA2	Rod photoreceptors
ZBTB7A.1	0	0.912053	0.479	0.172	0	6	ZBTB7A	Rod photoreceptors
PROM1	0	0.911569	0.459	0.144	0	6	PROM1	Rod photoreceptors
H3F3B.1	0	0.903592	0.999	0.991	0	6	H3F3B	Rod photoreceptors
SYCE1L	4.07e-273	0.903062	0.475	0.185	1.05e-268	6	SYCE1L	Rod photoreceptors
UQCC2.1	2.15e-242	0.90044	0.692	0.402	5.55e-238	6	UQCC2	Rod photoreceptors
DMD	0	0.899327	0.369	0.085	0	6	DMD	Rod photoreceptors
INHBB	0	0.894186	0.37	0.071	0	6	INHBB	Rod photoreceptors
AC055733.2	0	0.893019	0.319	0.045	0	6	AC055733.2	Rod photoreceptors
FAM57B.4	5.28e-249	0.891224	0.672	0.348	1.36e-244	6	FAM57B	Rod photoreceptors
ABCA1	0	0.890538	0.357	0.071	0	6	ABCA1	Rod photoreceptors
GSE1.1	3.58e-242	0.886013	0.556	0.259	9.23e-238	6	GSE1	Rod photoreceptors
PNPLA3.1	0	0.877798	0.426	0.12	0	6	PNPLA3	Rod photoreceptors
PGRMC2.3	1.25e-243	0.877228	0.69	0.392	3.21e-239	6	PGRMC2	Rod photoreceptors
RXRG.6	0	0.868556	0.562	0.195	0	6	RXRG	Rod photoreceptors
TMEM108.1	0	0.864854	0.38	0.085	0	6	TMEM108	Rod photoreceptors
AMOTL2	7.62e-210	0.86186	0.538	0.269	1.96e-205	6	AMOTL2	Rod photoreceptors
PLA2G4C.1	0	0.861449	0.343	0.064	0	6	PLA2G4C	Rod photoreceptors
CASZ1	6.75e-250	0.849351	0.56	0.253	1.74e-245	6	CASZ1	Rod photoreceptors
CPLX4	0	0.848857	0.275	0.054	0	6	CPLX4	Rod photoreceptors
C2orf71.1	0	0.848147	0.349	0.056	0	6	C2orf71	Rod photoreceptors
AC104938.1	0	0.840622	0.287	0.031	0	6	AC104938.1	Rod photoreceptors
GNB1	5.26e-103	0.837696	0.582	0.407	1.35e-98	6	GNB1	Rod photoreceptors
SEC62.1	4.34e-259	0.832868	0.863	0.67	1.12e-254	6	SEC62	Rod photoreceptors
CTBS.1	0	0.829465	0.423	0.124	0	6	CTBS	Rod photoreceptors
CCDC60	0	0.824067	0.372	0.081	0	6	CCDC60	Rod photoreceptors
TPD52	2.89e-263	0.823588	0.463	0.178	7.44e-259	6	TPD52	Rod photoreceptors
PRNP	1.23e-250	0.822063	0.552	0.25	3.16e-246	6	PRNP	Rod photoreceptors
LOXL1-AS1	4.63e-302	0.804478	0.331	0.09	1.19e-297	6	LOXL1-AS1	Rod photoreceptors
VPS36	6.01e-208	0.800096	0.523	0.254	1.55e-203	6	VPS36	Rod photoreceptors
USP2	0	0.799825	0.326	0.063	0	6	USP2	Rod photoreceptors
LMO1.1	0	0.79263	0.377	0.109	0	6	LMO1	Rod photoreceptors
LHX3	0	0.791385	0.332	0.072	0	6	LHX3	Rod photoreceptors
ATP1A3.4	1.56e-224	0.788524	0.711	0.389	4.01e-220	6	ATP1A3	Rod photoreceptors
DOCK8	0	0.787217	0.305	0.049	0	6	DOCK8	Rod photoreceptors
LLGL2	0	0.784639	0.347	0.068	0	6	LLGL2	Rod photoreceptors
HS3ST3B1	0	0.784583	0.296	0.055	0	6	HS3ST3B1	Rod photoreceptors
SYTL4.1	0	0.78027	0.333	0.086	0	6	SYTL4	Rod photoreceptors
EPHA8	0	0.779515	0.352	0.081	0	6	EPHA8	Rod photoreceptors
PAG1	5.52e-255	0.777721	0.454	0.171	1.42e-250	6	PAG1	Rod photoreceptors
ABHD14A.1	2.09e-214	0.777437	0.576	0.29	5.38e-210	6	ABHD14A	Rod photoreceptors
MAOA	0	0.777382	0.376	0.09	0	6	MAOA	Rod photoreceptors
PRCD	1.45e-265	0.771283	0.319	0.092	3.75e-261	6	PRCD	Rod photoreceptors
SLC6A15	9.44e-281	0.769848	0.348	0.105	2.43e-276	6	SLC6A15	Rod photoreceptors
ATP5F1A	4.48e-217	0.767475	0.839	0.665	1.15e-212	6	ATP5F1A	Rod photoreceptors
CDK5R2	8.39e-243	0.756354	0.386	0.139	2.16e-238	6	CDK5R2	Rod photoreceptors
GPC6.1	4.35e-274	0.755638	0.373	0.119	1.12e-269	6	GPC6	Rod photoreceptors
PLCH2	1.61e-303	0.755369	0.331	0.089	4.14e-299	6	PLCH2	Rod photoreceptors
HSPA4	1.78e-144	0.748368	0.51	0.288	4.58e-140	6	HSPA4	Rod photoreceptors
FAM19A4	0	0.748245	0.32	0.07	0	6	FAM19A4	Rod photoreceptors
LCORL	1.12e-176	0.748167	0.54	0.282	2.87e-172	6	LCORL	Rod photoreceptors
KIAA1614	3.3e-301	0.747603	0.339	0.094	8.49e-297	6	KIAA1614	Rod photoreceptors
KDM5B	7.81e-175	0.747104	0.664	0.415	2.01e-170	6	KDM5B	Rod photoreceptors
CAMK2B	6.16e-208	0.745715	0.422	0.17	1.59e-203	6	CAMK2B	Rod photoreceptors
IQSEC1	5.1e-233	0.744955	0.384	0.139	1.31e-228	6	IQSEC1	Rod photoreceptors
PCMTD2	1.74e-191	0.742723	0.604	0.328	4.48e-187	6	PCMTD2	Rod photoreceptors
SGK3	0	0.742666	0.3	0.065	0	6	SGK3	Rod photoreceptors
RRAD	3.06e-256	0.741282	0.369	0.114	7.89e-252	6	RRAD	Rod photoreceptors
COL16A1.1	4.23e-283	0.740656	0.4	0.127	1.09e-278	6	COL16A1	Rod photoreceptors
GUK1.2	8.01e-198	0.734364	0.767	0.513	2.06e-193	6	GUK1	Rod photoreceptors
DUSP2	4.73e-299	0.73432	0.225	0.045	1.22e-294	6	DUSP2	Rod photoreceptors
TMX4	9.6e-163	0.733155	0.564	0.322	2.47e-158	6	TMX4	Rod photoreceptors
CLUL1	0	0.732369	0.146	0.017	0	6	CLUL1	Rod photoreceptors
TMX1.3	9.47e-181	0.731853	0.621	0.352	2.44e-176	6	TMX1	Rod photoreceptors
AHI1	9.12e-161	0.730876	0.634	0.383	2.35e-156	6	AHI1	Rod photoreceptors
LRRC4C	1.96e-175	0.729004	0.515	0.254	5.05e-171	6	LRRC4C	Rod photoreceptors
DCT.6	0	0.728751	0.492	0.152	0	6	DCT	Rod photoreceptors
VAMP2.1	3.64e-209	0.726089	0.881	0.711	9.38e-205	6	VAMP2	Rod photoreceptors
MOK	9.19e-216	0.723351	0.415	0.163	2.37e-211	6	MOK	Rod photoreceptors
ANKRD11	1.31e-138	0.719467	0.696	0.492	3.37e-134	6	ANKRD11	Rod photoreceptors
GPR180	5.74e-285	0.714967	0.37	0.113	1.48e-280	6	GPR180	Rod photoreceptors
AC092040.1	0	0.713333	0.288	0.057	0	6	AC092040.1	Rod photoreceptors
YPEL3.1	3.75e-156	0.712852	0.72	0.525	9.66e-152	6	YPEL3	Rod photoreceptors
RNF8	4.12e-181	0.712368	0.468	0.223	1.06e-176	6	RNF8	Rod photoreceptors
GNB5	1.46e-175	0.710794	0.463	0.22	3.76e-171	6	GNB5	Rod photoreceptors
NUDT14	7.28e-210	0.710315	0.43	0.179	1.88e-205	6	NUDT14	Rod photoreceptors
ANXA4	0	0.707941	0.28	0.049	0	6	ANXA4	Rod photoreceptors
YBX3	2.47e-62	0.700364	0.382	0.247	6.36e-58	6	YBX3	Rod photoreceptors
SRSF9	4.98e-133	-0.702954	0.448	0.662	1.28e-128	6	SRSF9	Rod photoreceptors
DDHD1.4	7.12e-65	-0.703775	0.197	0.367	1.83e-60	6	DDHD1	Rod photoreceptors
ETFB	1.32e-97	-0.704543	0.371	0.567	3.4e-93	6	ETFB	Rod photoreceptors
CLIC1.2	1.63e-104	-0.706625	0.099	0.321	4.19e-100	6	CLIC1	Rod photoreceptors
PPIA	9.86e-179	-0.708764	0.818	0.895	2.54e-174	6	PPIA	Rod photoreceptors
PLPPR3	2.57e-77	-0.71023	0.113	0.292	6.63e-73	6	PLPPR3	Rod photoreceptors
LSAMP	3.35e-110	-0.713845	0.04	0.256	8.63e-106	6	LSAMP	Rod photoreceptors
LHX2.1	2.21e-83	-0.715128	0.144	0.336	5.71e-79	6	LHX2	Rod photoreceptors
ISL1.3	4.57e-35	-0.716482	0.032	0.118	1.18e-30	6	ISL1	Rod photoreceptors
NKAIN4	4.58e-112	-0.716562	0.04	0.257	1.18e-107	6	NKAIN4	Rod photoreceptors
TFDP2.1	2.69e-94	-0.716635	0.238	0.451	6.94e-90	6	TFDP2	Rod photoreceptors
ELAVL4.3	5.56e-47	-0.717647	0.039	0.15	1.43e-42	6	ELAVL4	Rod photoreceptors
KDR.5	3.02e-84	-0.718013	0.034	0.206	7.79e-80	6	KDR	Rod photoreceptors
NEFM.3	7.86e-21	-0.721018	0.096	0.169	2.03e-16	6	NEFM	Rod photoreceptors
FEZ1.1	1.17e-96	-0.724144	0.054	0.253	3.01e-92	6	FEZ1	Rod photoreceptors
VSX2.2	1.23e-88	-0.72565	0.075	0.268	3.17e-84	6	VSX2	Rod photoreceptors
GPM6B.5	5.73e-55	-0.728612	0.453	0.568	1.48e-50	6	GPM6B	Rod photoreceptors
QDPR.5	4.71e-55	-0.730905	0.242	0.394	1.21e-50	6	QDPR	Rod photoreceptors
COL2A1.4	2.39e-92	-0.730939	0.036	0.222	6.15e-88	6	COL2A1	Rod photoreceptors
PTTG1.3	1.19e-28	-0.731218	0.077	0.164	3.07e-24	6	PTTG1	Rod photoreceptors
UBE2C.5	9.18e-17	-0.732527	0.066	0.123	2.36e-12	6	UBE2C	Rod photoreceptors
FDFT1.1	3.19e-96	-0.736133	0.142	0.352	8.22e-92	6	FDFT1	Rod photoreceptors
RHEB	1.55e-112	-0.736346	0.333	0.557	3.99e-108	6	RHEB	Rod photoreceptors
NAP1L1	1.04e-139	-0.73744	0.658	0.805	2.67e-135	6	NAP1L1	Rod photoreceptors
CFL1.1	3.95e-193	-0.739494	0.819	0.897	1.02e-188	6	CFL1	Rod photoreceptors
GATB.5	2.58e-71	-0.739914	0.142	0.316	6.64e-67	6	GATB	Rod photoreceptors
TLE4.2	5.5e-90	-0.741338	0.187	0.402	1.42e-85	6	TLE4	Rod photoreceptors
LHX9.2	3.29e-47	-0.741897	0.053	0.17	8.47e-43	6	LHX9	Rod photoreceptors
PPP1R14B	6.59e-82	-0.74324	0.304	0.486	1.7e-77	6	PPP1R14B	Rod photoreceptors
BNIP3	1.12e-75	-0.744882	0.459	0.617	2.87e-71	6	BNIP3	Rod photoreceptors
SNCA	4.07e-48	-0.74547	0.087	0.214	1.05e-43	6	SNCA	Rod photoreceptors
GNAI2.2	1.63e-100	-0.74639	0.27	0.488	4.2e-96	6	GNAI2	Rod photoreceptors
HSPB1.1	6.99e-71	-0.747937	0.228	0.418	1.8e-66	6	HSPB1	Rod photoreceptors
DCX.4	5.63e-77	-0.750545	0.051	0.217	1.45e-72	6	DCX	Rod photoreceptors
ACTG1	0	-0.756183	0.986	0.995	0	6	ACTG1	Rod photoreceptors
ZFHX3.3	2.86e-57	-0.758657	0.092	0.238	7.36e-53	6	ZFHX3	Rod photoreceptors
DBI.3	6.59e-107	-0.767476	0.387	0.589	1.7e-102	6	DBI	Rod photoreceptors
CREB5.3	8.3e-104	-0.768677	0.023	0.221	2.14e-99	6	CREB5	Rod photoreceptors
UCHL1.3	7.02e-30	-0.769214	0.372	0.462	1.81e-25	6	UCHL1	Rod photoreceptors
NUSAP1.3	3.48e-35	-0.772555	0.054	0.147	8.96e-31	6	NUSAP1	Rod photoreceptors
GNG3.4	8.64e-72	-0.773578	0.069	0.231	2.23e-67	6	GNG3	Rod photoreceptors
MAPK10.2	3.11e-118	-0.775146	0.118	0.362	8.02e-114	6	MAPK10	Rod photoreceptors
TMEM98.1	1.48e-120	-0.779427	0.202	0.444	3.81e-116	6	TMEM98	Rod photoreceptors
ZEB2.1	6.41e-110	-0.78141	0.341	0.567	1.65e-105	6	ZEB2	Rod photoreceptors
CKS2.2	1.48e-61	-0.7819	0.154	0.317	3.82e-57	6	CKS2	Rod photoreceptors
RBP1.1	5.17e-133	-0.783575	0.73	0.854	1.33e-128	6	RBP1	Rod photoreceptors
TRPM3.3	1.56e-107	-0.786757	0.025	0.229	4.01e-103	6	TRPM3	Rod photoreceptors
NEFL.2	2.04e-23	-0.800815	0.109	0.189	5.25e-19	6	NEFL	Rod photoreceptors
SLC1A3.5	1.98e-88	-0.802224	0.047	0.231	5.11e-84	6	SLC1A3	Rod photoreceptors
RUNX1T1.6	7.93e-72	-0.804025	0.058	0.218	2.04e-67	6	RUNX1T1	Rod photoreceptors
FEZF2.1	9.07e-111	-0.805448	0.044	0.261	2.34e-106	6	FEZF2	Rod photoreceptors
STMN1.1	4.46e-293	-0.827484	0.954	0.98	1.15e-288	6	STMN1	Rod photoreceptors
BAMBI.4	2.4e-91	-0.830427	0.096	0.295	6.19e-87	6	BAMBI	Rod photoreceptors
PMEPA1.6	9.9e-77	-0.832542	0.366	0.535	2.55e-72	6	PMEPA1	Rod photoreceptors
PLP1.6	1.53e-86	-0.835789	0.059	0.242	3.94e-82	6	PLP1	Rod photoreceptors
ID2.2	4.2e-78	-0.839008	0.18	0.371	1.08e-73	6	ID2	Rod photoreceptors
HMGCS1.1	1.36e-71	-0.839193	0.156	0.329	3.51e-67	6	HMGCS1	Rod photoreceptors
RTN4.4	4.02e-200	-0.849698	0.816	0.897	1.03e-195	6	RTN4	Rod photoreceptors
EPHB2.2	8.08e-126	-0.851011	0.108	0.358	2.08e-121	6	EPHB2	Rod photoreceptors
GAPDH	0	-0.85339	0.954	0.985	0	6	GAPDH	Rod photoreceptors
MAB21L2.2	1.95e-134	-0.854669	0.06	0.313	5.03e-130	6	MAB21L2	Rod photoreceptors
SCG5.5	5.44e-83	-0.858547	0.098	0.284	1.4e-78	6	SCG5	Rod photoreceptors
LMO4.6	1.77e-33	-0.861392	0.261	0.382	4.56e-29	6	LMO4	Rod photoreceptors
TUBB.3	2.12e-119	-0.869053	0.867	0.911	5.47e-115	6	TUBB	Rod photoreceptors
VCAN.2	2.76e-120	-0.870038	0.053	0.286	7.11e-116	6	VCAN	Rod photoreceptors
PROX1.2	3.93e-86	-0.874028	0.088	0.277	1.01e-81	6	PROX1	Rod photoreceptors
MYB.5	1.43e-121	-0.874152	0.061	0.295	3.69e-117	6	MYB	Rod photoreceptors
CRMP1.6	1.51e-79	-0.880213	0.35	0.512	3.9e-75	6	CRMP1	Rod photoreceptors
HMGB2.3	1.97e-15	-0.881907	0.569	0.591	5.07e-11	6	HMGB2	Rod photoreceptors
C1orf61.6	1.62e-48	-0.892335	0.114	0.243	4.18e-44	6	C1orf61	Rod photoreceptors
PCDH9.3	3.82e-82	-0.898971	0.079	0.263	9.83e-78	6	PCDH9	Rod photoreceptors
CSRP2.3	1.15e-106	-0.904733	0.282	0.509	2.95e-102	6	CSRP2	Rod photoreceptors
TYMS.3	8.56e-82	-0.905776	0.103	0.286	2.21e-77	6	TYMS	Rod photoreceptors
GRIA4.3	4.81e-135	-0.919335	0.041	0.291	1.24e-130	6	GRIA4	Rod photoreceptors
NES.4	4.64e-121	-0.919381	0.075	0.311	1.2e-116	6	NES	Rod photoreceptors
MARCKSL1.2	5.7e-231	-0.929572	0.869	0.929	1.47e-226	6	MARCKSL1	Rod photoreceptors
TMSB10.4	1.37e-132	-0.932042	0.959	0.975	3.53e-128	6	TMSB10	Rod photoreceptors
METRN.5	3.74e-106	-0.937501	0.128	0.351	9.65e-102	6	METRN	Rod photoreceptors
EGR1.5	2.18e-66	-0.942432	0.141	0.308	5.61e-62	6	EGR1	Rod photoreceptors
GNAS.1	3.74e-212	-0.946083	0.713	0.852	9.64e-208	6	GNAS	Rod photoreceptors
LGR4.3	1.28e-141	-0.946705	0.154	0.425	3.3e-137	6	LGR4	Rod photoreceptors
ATOH7.5	2.41e-17	-0.946816	0.045	0.1	6.2e-13	6	ATOH7	Rod photoreceptors
RBFOX2.2	8.22e-125	-0.948515	0.058	0.295	2.12e-120	6	RBFOX2	Rod photoreceptors
TMSB15A	1.03e-172	-0.948977	0.353	0.616	2.64e-168	6	TMSB15A	Rod photoreceptors
ENO1.1	9.08e-207	-0.950701	0.768	0.882	2.34e-202	6	ENO1	Rod photoreceptors
ELAVL3.6	1.37e-120	-0.955209	0.057	0.289	3.53e-116	6	ELAVL3	Rod photoreceptors
CNN3.4	1.78e-147	-0.957914	0.286	0.54	4.59e-143	6	CNN3	Rod photoreceptors
KIF5C.5	6.59e-116	-0.96591	0.1	0.334	1.7e-111	6	KIF5C	Rod photoreceptors
ONECUT2.5	8.6e-61	-0.969981	0.034	0.168	2.22e-56	6	ONECUT2	Rod photoreceptors
TTYH1.6	5.19e-65	-0.970058	0.422	0.522	1.34e-60	6	TTYH1	Rod photoreceptors
PRSS35.6	7e-93	-0.971827	0.04	0.226	1.8e-88	6	PRSS35	Rod photoreceptors
ZNF385D.2	1.64e-121	-0.996176	0.124	0.372	4.23e-117	6	ZNF385D	Rod photoreceptors
GAS1.6	6.02e-104	-0.996763	0.06	0.269	1.55e-99	6	GAS1	Rod photoreceptors
NNAT.1	1.56e-166	-1.00169	0.624	0.806	4.02e-162	6	NNAT	Rod photoreceptors
TRH.1	2.19e-134	-1.0054	0.05	0.3	5.64e-130	6	TRH	Rod photoreceptors
TFAP2B.6	4.9e-50	-1.00849	0.057	0.176	1.26e-45	6	TFAP2B	Rod photoreceptors
AL139246.5.5	3.1e-75	-1.00984	0.08	0.248	7.98e-71	6	AL139246.5	Rod photoreceptors
TCF4.5	7.47e-123	-1.02383	0.39	0.598	1.92e-118	6	TCF4	Rod photoreceptors
PCSK1N.6	7.02e-94	-1.0241	0.221	0.42	1.81e-89	6	PCSK1N	Rod photoreceptors
RND3.3	3.36e-91	-1.03931	0.08	0.279	8.66e-87	6	RND3	Rod photoreceptors
NOVA1.2	2.7e-195	-1.03974	0.054	0.382	6.96e-191	6	NOVA1	Rod photoreceptors
FABP5.1	1.23e-188	-1.04379	0.31	0.598	3.16e-184	6	FABP5	Rod photoreceptors
MLLT11.6	3.48e-82	-1.05739	0.385	0.534	8.98e-78	6	MLLT11	Rod photoreceptors
FBXW7.4	8.31e-144	-1.06042	0.178	0.447	2.14e-139	6	FBXW7	Rod photoreceptors
ACTB.1	0	-1.06082	0.897	0.96	0	6	ACTB	Rod photoreceptors
C4orf48.4	1.23e-131	-1.09513	0.172	0.43	3.17e-127	6	C4orf48	Rod photoreceptors
SNCG.4	2.72e-34	-1.09625	0.108	0.21	7e-30	6	SNCG	Rod photoreceptors
CENPF.6	1.13e-40	-1.10235	0.047	0.149	2.91e-36	6	CENPF	Rod photoreceptors
TFAP2A.6	1.48e-40	-1.112	0.095	0.205	3.82e-36	6	TFAP2A	Rod photoreceptors
TOP2A.6	1.6e-36	-1.11781	0.062	0.16	4.13e-32	6	TOP2A	Rod photoreceptors
JPT1.6	3.28e-143	-1.13044	0.38	0.595	8.46e-139	6	JPT1	Rod photoreceptors
NSG1.6	7.03e-86	-1.14726	0.092	0.277	1.81e-81	6	NSG1	Rod photoreceptors
STMN4.6	1.77e-103	-1.15185	0.112	0.325	4.55e-99	6	STMN4	Rod photoreceptors
TAGLN3.6	1.14e-135	-1.15557	0.236	0.482	2.93e-131	6	TAGLN3	Rod photoreceptors
TUBB2A.5	1.29e-90	-1.16052	0.354	0.533	3.33e-86	6	TUBB2A	Rod photoreceptors
H1F0.1	2.94e-189	-1.18457	0.162	0.483	7.58e-185	6	H1F0	Rod photoreceptors
CXCR4.4	7.9e-172	-1.21762	0.082	0.379	2.04e-167	6	CXCR4	Rod photoreceptors
MGARP.2	1.66e-251	-1.25577	0.28	0.628	4.28e-247	6	MGARP	Rod photoreceptors
SOX9.6	1.7e-171	-1.27637	0.119	0.416	4.37e-167	6	SOX9	Rod photoreceptors
CD24.6	4.12e-101	-1.27869	0.33	0.503	1.06e-96	6	CD24	Rod photoreceptors
LINC00461.5	1.99e-155	-1.29398	0.193	0.46	5.13e-151	6	LINC00461	Rod photoreceptors
ID3.5	5.31e-92	-1.324	0.143	0.343	1.37e-87	6	ID3	Rod photoreceptors
GAP43.4	7.61e-62	-1.32702	0.103	0.255	1.96e-57	6	GAP43	Rod photoreceptors
MEST.5	3.53e-199	-1.32954	0.254	0.558	9.1e-195	6	MEST	Rod photoreceptors
PRPH.6	1.23e-41	-1.35021	0.025	0.12	3.17e-37	6	PRPH	Rod photoreceptors
TF.6	7.58e-76	-1.42676	0.128	0.301	1.95e-71	6	TF	Rod photoreceptors
RTN1.6	1.13e-87	-1.45029	0.197	0.378	2.91e-83	6	RTN1	Rod photoreceptors
BASP1.6	1.2e-259	-1.46337	0.465	0.743	3.1e-255	6	BASP1	Rod photoreceptors
SAT1.6	1e-80	-1.47677	0.309	0.476	2.59e-76	6	SAT1	Rod photoreceptors
ASCL1.5	2.11e-152	-1.50494	0.175	0.436	5.44e-148	6	ASCL1	Rod photoreceptors
HES4.6	5.43e-208	-1.5346	0.191	0.514	1.4e-203	6	HES4	Rod photoreceptors
MEG3.1	4.36e-241	-1.57365	0.212	0.571	1.12e-236	6	MEG3	Rod photoreceptors
CYR61.5	5.44e-160	-1.58535	0.053	0.332	1.4e-155	6	CYR61	Rod photoreceptors
DKK3.5	1.23e-301	-1.63168	0.155	0.566	3.16e-297	6	DKK3	Rod photoreceptors
ZFP36L1.6	1.55e-194	-1.66241	0.17	0.471	4e-190	6	ZFP36L1	Rod photoreceptors
RGS16.2	1.33e-198	-1.67511	0.19	0.505	3.43e-194	6	RGS16	Rod photoreceptors
IGFBP2.2	1.45e-257	-1.72992	0.118	0.502	3.75e-253	6	IGFBP2	Rod photoreceptors
MIAT.3	0	-1.73998	0.126	0.578	0	6	MIAT	Rod photoreceptors
SFRP2.6	1.65e-196	-1.74863	0.114	0.431	4.25e-192	6	SFRP2	Rod photoreceptors
TUBB2B.5	0	-1.75446	0.741	0.928	0	6	TUBB2B	Rod photoreceptors
CLU.6	0	-1.7954	0.19	0.597	0	6	CLU	Rod photoreceptors
MDK.2	0	-1.83615	0.178	0.598	0	6	MDK	Rod photoreceptors
SPP1.6	9.36e-221	-1.89153	0.25	0.558	2.41e-216	6	SPP1	Rod photoreceptors
SOX2.6	1.47e-200	-1.90478	0.32	0.569	3.78e-196	6	SOX2	Rod photoreceptors
TUBA1A.1	0	-2.09511	0.849	0.973	0	6	TUBA1A	Rod photoreceptors
STMN2.6	3.08e-120	-2.12066	0.477	0.635	7.93e-116	6	STMN2	Rod photoreceptors
PAX6.3	0	-2.17744	0.308	0.776	0	6	PAX6	Rod photoreceptors
CCND1.6	3.09e-187	-2.18404	0.328	0.57	7.96e-183	6	CCND1	Rod photoreceptors
HES5.6	3.36e-141	-2.2811	0.133	0.387	8.65e-137	6	HES5	Rod photoreceptors
HES1.6	2.2e-188	-2.3123	0.185	0.477	5.68e-184	6	HES1	Rod photoreceptors
CRABP1.3	0	-2.39046	0.667	0.908	0	6	CRABP1	Rod photoreceptors
VIM.6	0	-2.43884	0.609	0.826	0	6	VIM	Rod photoreceptors
PTF1A.1	0	2.44079	0.601	0.068	0	7	PTF1A	T2
PRDM13	0	1.73493	0.528	0.058	0	7	PRDM13	T2
STMN2.7	0	1.66311	0.979	0.614	0	7	STMN2	T2
ONECUT2.6	0	1.60498	0.464	0.15	0	7	ONECUT2	T2
TFAP2B.7	0	1.5484	0.701	0.149	0	7	TFAP2B	T2
IGFBP2.3	2.13e-302	1.47929	0.763	0.474	5.49e-298	7	IGFBP2	T2
ACKR3	0	1.46883	0.414	0.051	0	7	ACKR3	T2
RUNX1T1.7	0	1.42601	0.631	0.194	0	7	RUNX1T1	T2
SOX4.3	0	1.36883	0.999	0.973	0	7	SOX4	T2
SPATS2L	0	1.36555	0.431	0.093	0	7	SPATS2L	T2
HIF1A	3.76e-288	1.28531	0.738	0.48	9.69e-284	7	HIF1A	T2
AL391650.1.2	0	1.26655	0.747	0.345	0	7	AL391650.1	T2
MIR181A1HG.1	0	1.23018	0.556	0.214	0	7	MIR181A1HG	T2
PAX6.4	0	1.2294	0.965	0.748	0	7	PAX6	T2
CD24.7	0	1.21303	0.89	0.479	0	7	CD24	T2
BNIP3.1	0	1.20769	0.845	0.601	0	7	BNIP3	T2
VEGFA	1.6e-185	1.20742	0.525	0.284	4.13e-181	7	VEGFA	T2
FAM162A	1.55e-258	1.20021	0.612	0.33	4e-254	7	FAM162A	T2
MLLT11.7	0	1.17969	0.868	0.514	0	7	MLLT11	T2
PLXNA2.2	0	1.16713	0.42	0.07	0	7	PLXNA2	T2
NHLH2	0	1.16333	0.411	0.098	0	7	NHLH2	T2
SOX11	1.5e-281	1.13327	0.853	0.627	3.87e-277	7	SOX11	T2
TFAP2A.7	0	1.12913	0.586	0.184	0	7	TFAP2A	T2
ENO1.2	0	1.0918	0.953	0.874	0	7	ENO1	T2
NREP.4	0	1.06772	0.913	0.666	0	7	NREP	T2
LHX9.3	7.32e-102	1.03595	0.321	0.159	1.89e-97	7	LHX9	T2
CABP1	0	1.03477	0.358	0.063	0	7	CABP1	T2
NRP1.1	2.72e-261	1.03289	0.35	0.109	7.02e-257	7	NRP1	T2
STC2	0	1.03214	0.312	0.056	0	7	STC2	T2
PGK1	2.49e-263	1.02963	0.85	0.665	6.42e-259	7	PGK1	T2
CXXC5.3	8.28e-280	1.01144	0.83	0.623	2.13e-275	7	CXXC5	T2
ST18	0	1.00675	0.349	0.079	0	7	ST18	T2
CELF4.5	1.88e-274	0.995554	0.602	0.268	4.85e-270	7	CELF4	T2
HMX1	1.77e-157	0.991425	0.719	0.542	4.57e-153	7	HMX1	T2
RBP1.2	1.15e-205	0.987139	0.93	0.845	2.97e-201	7	RBP1	T2
STMN4.7	7.51e-225	0.981286	0.611	0.304	1.94e-220	7	STMN4	T2
BARHL2.2	0	0.951483	0.356	0.095	0	7	BARHL2	T2
MARCKSL1.3	0	0.951359	0.987	0.924	0	7	MARCKSL1	T2
CCDC88A.1	1.81e-231	0.951024	0.82	0.615	4.67e-227	7	CCDC88A	T2
GPC2	2.07e-249	0.945712	0.564	0.267	5.32e-245	7	GPC2	T2
BZW2.1	1.6e-214	0.917926	0.614	0.349	4.11e-210	7	BZW2	T2
ZNF385D.3	3.87e-195	0.907632	0.62	0.351	9.98e-191	7	ZNF385D	T2
TUBB2B.6	0	0.902356	0.98	0.918	0	7	TUBB2B	T2
NRXN3.1	1.42e-283	0.897314	0.408	0.13	3.67e-279	7	NRXN3	T2
ELAVL3.7	8.62e-244	0.875937	0.594	0.266	2.22e-239	7	ELAVL3	T2
BASP1.7	5.06e-266	0.871508	0.905	0.724	1.3e-261	7	BASP1	T2
AP1S2.1	4.27e-127	0.866392	0.519	0.324	1.1e-122	7	AP1S2	T2
ZNF804A	2.66e-181	0.855961	0.277	0.09	6.86e-177	7	ZNF804A	T2
MIR124-2HG.4	9.24e-198	0.854171	0.566	0.291	2.38e-193	7	MIR124-2HG	T2
JPT1.7	1.87e-206	0.82666	0.814	0.576	4.82e-202	7	JPT1	T2
GRIA2.1	3.72e-250	0.825582	0.403	0.137	9.59e-246	7	GRIA2	T2
CRABP1.4	1.17e-170	0.822645	0.976	0.895	3.02e-166	7	CRABP1	T2
PPP1R14B.1	7.32e-162	0.801263	0.691	0.47	1.89e-157	7	PPP1R14B	T2
APLP1.4	6.71e-189	0.797412	0.6	0.324	1.73e-184	7	APLP1	T2
PFKFB3	6.93e-187	0.785563	0.341	0.127	1.78e-182	7	PFKFB3	T2
TMSB10.5	0	0.778918	0.993	0.974	0	7	TMSB10	T2
GAPDH.1	0	0.774246	0.996	0.983	0	7	GAPDH	T2
ONECUT1.1	1.47e-183	0.763756	0.316	0.108	3.78e-179	7	ONECUT1	T2
KDM6B	1.9e-107	0.758614	0.428	0.247	4.89e-103	7	KDM6B	T2
RNF165	3.69e-115	0.757664	0.573	0.383	9.52e-111	7	RNF165	T2
PCSK1N.7	2.38e-208	0.756657	0.726	0.398	6.12e-204	7	PCSK1N	T2
MIF.1	1.66e-135	0.749383	0.815	0.675	4.28e-131	7	MIF	T2
EFNA5	2.35e-145	0.747827	0.358	0.157	6.07e-141	7	EFNA5	T2
TAGLN3.7	3.4e-191	0.719365	0.747	0.46	8.76e-187	7	TAGLN3	T2
PFKP	1.91e-101	0.719279	0.245	0.104	4.93e-97	7	PFKP	T2
CELF3	1.42e-153	0.714832	0.379	0.168	3.67e-149	7	CELF3	T2
SLC16A3	3.03e-118	0.712176	0.317	0.142	7.81e-114	7	SLC16A3	T2
DNM1	1.21e-87	0.70417	0.359	0.2	3.12e-83	7	DNM1	T2
2006-09-01	1.19e-110	0.700837	0.506	0.318	3.06e-106	7	2006-09-01	T2
SLC1A7.6	2.92e-77	-0.700701	0.021	0.188	7.52e-73	7	SLC1A7	T2
SPARC.1	5.86e-58	-0.703721	0.029	0.168	1.51e-53	7	SPARC	T2
CDH2.1	3.91e-115	-0.70637	0.355	0.631	1.01e-110	7	CDH2	T2
TLE4.3	3.15e-110	-0.706813	0.133	0.403	8.12e-106	7	TLE4	T2
ANKRD33B.3	2.06e-73	-0.708255	0.013	0.169	5.31e-69	7	ANKRD33B	T2
MCAM.4	1.93e-80	-0.713604	0.025	0.2	4.97e-76	7	MCAM	T2
SMAD2.1	2.14e-117	-0.714116	0.164	0.449	5.52e-113	7	SMAD2	T2
IMPG2.7	2.35e-65	-0.717775	0.02	0.164	6.05e-61	7	IMPG2	T2
PMEPA1.7	9.98e-65	-0.721875	0.349	0.535	2.57e-60	7	PMEPA1	T2
HES6.3	2.55e-37	-0.740114	0.401	0.536	6.57e-33	7	HES6	T2
CRNDE.2	6.02e-117	-0.744133	0.063	0.314	1.55e-112	7	CRNDE	T2
DBI.4	2.49e-102	-0.746243	0.35	0.59	6.4e-98	7	DBI	T2
KDR.6	2.36e-92	-0.748481	0.016	0.207	6.09e-88	7	KDR	T2
COL2A1.5	9.21e-97	-0.759278	0.023	0.222	2.37e-92	7	COL2A1	T2
TYMS.4	3.95e-62	-0.761596	0.114	0.285	1.02e-57	7	TYMS	T2
ATP1B2.5	1.5e-61	-0.768024	0.257	0.44	3.86e-57	7	ATP1B2	T2
TMEM123.2	4.27e-124	-0.775392	0.11	0.383	1.1e-119	7	TMEM123	T2
HSPA1B	2.62e-30	-0.779078	0.413	0.535	6.76e-26	7	HSPA1B	T2
ILDR2.4	7.71e-111	-0.782461	0.061	0.302	1.99e-106	7	ILDR2	T2
CKS2.3	4.69e-71	-0.793712	0.126	0.317	1.21e-66	7	CKS2	T2
DEK.2	5.75e-106	-0.798677	0.44	0.668	1.48e-101	7	DEK	T2
PLEKHB1.3	1.69e-114	-0.803686	0.025	0.256	4.35e-110	7	PLEKHB1	T2
VSX2.3	1.67e-115	-0.805594	0.033	0.269	4.29e-111	7	VSX2	T2
PTTG1.4	7.64e-51	-0.807294	0.038	0.165	1.97e-46	7	PTTG1	T2
BAMBI.5	2.98e-87	-0.808758	0.088	0.294	7.67e-83	7	BAMBI	T2
SMC4.2	4.88e-67	-0.809528	0.078	0.248	1.26e-62	7	SMC4	T2
DNAJB1.1	1.57e-31	-0.811192	0.297	0.42	4.04e-27	7	DNAJB1	T2
NUSAP1.4	4.15e-53	-0.815753	0.024	0.148	1.07e-48	7	NUSAP1	T2
B2M.2	1.56e-94	-0.818439	0.082	0.305	4.03e-90	7	B2M	T2
RTN4.5	3.06e-180	-0.819512	0.801	0.897	7.89e-176	7	RTN4	T2
UBE2C.6	1.47e-37	-0.820778	0.028	0.124	3.79e-33	7	UBE2C	T2
RXRG.7	5.22e-88	-0.820969	0.029	0.218	1.35e-83	7	RXRG	T2
CCDC181.4	2.33e-118	-0.825925	0.06	0.31	6.01e-114	7	CCDC181	T2
MYO10.5	1.4e-110	-0.828193	0.089	0.338	3.6e-106	7	MYO10	T2
GATB.6	6.25e-107	-0.830634	0.079	0.318	1.61e-102	7	GATB	T2
NFIB.2	3.57e-97	-0.831365	0.098	0.331	9.21e-93	7	NFIB	T2
PGRMC2.4	2.19e-123	-0.835243	0.14	0.416	5.65e-119	7	PGRMC2	T2
TULP1.7	7.86e-82	-0.836606	0.021	0.194	2.02e-77	7	TULP1	T2
PRDX1.3	2.96e-126	-0.836717	0.448	0.692	7.62e-122	7	PRDX1	T2
SLC1A3.6	1.8e-95	-0.839796	0.03	0.231	4.65e-91	7	SLC1A3	T2
MYB.6	3.75e-114	-0.844959	0.054	0.295	9.67e-110	7	MYB	T2
LIMCH1.5	2.45e-126	-0.848661	0.024	0.273	6.32e-122	7	LIMCH1	T2
PLP1.7	3.43e-98	-0.855708	0.034	0.242	8.83e-94	7	PLP1	T2
DKK3.6	1.83e-116	-0.864457	0.29	0.559	4.7e-112	7	DKK3	T2
MEST.6	1.21e-102	-0.866276	0.316	0.555	3.1e-98	7	MEST	T2
GAS1.7	2.72e-76	-0.883435	0.082	0.267	7e-72	7	GAS1	T2
RAX2.7	4.03e-71	-0.896307	0.022	0.178	1.04e-66	7	RAX2	T2
IER2.4	6.53e-106	-0.900385	0.387	0.62	1.68e-101	7	IER2	T2
HMGN2.2	8.02e-152	-0.909888	0.745	0.866	2.07e-147	7	HMGN2	T2
MAP1B.1	1.35e-199	-0.917379	0.665	0.882	3.48e-195	7	MAP1B	T2
JUN.4	3.44e-98	-0.927632	0.626	0.798	8.86e-94	7	JUN	T2
CCDC34.1	1.19e-126	-0.942989	0.122	0.398	3.06e-122	7	CCDC34	T2
RASD1.3	1.49e-73	-0.952605	0.108	0.296	3.84e-69	7	RASD1	T2
PRDM1.7	3.38e-81	-0.974337	0.026	0.201	8.71e-77	7	PRDM1	T2
ID4.4	4.82e-122	-0.975965	0.131	0.401	1.24e-117	7	ID4	T2
PRSS35.7	4.1e-98	-0.981705	0.024	0.226	1.06e-93	7	PRSS35	T2
PRPH.7	0.000682207	-0.985782	0.097	0.117	1	7	PRPH	T2
AL139246.5.6	1.05e-89	-0.986457	0.049	0.249	2.7e-85	7	AL139246.5	T2
GADD45G.7	1.32e-50	-0.992481	0.324	0.465	3.39e-46	7	GADD45G	T2
LGI4.2	9.17e-154	-0.994423	0.033	0.324	2.36e-149	7	LGI4	T2
QDPR.6	8.49e-131	-0.996304	0.118	0.398	2.19e-126	7	QDPR	T2
HIST1H1C.5	1.34e-99	-1.04214	0.125	0.355	3.44e-95	7	HIST1H1C	T2
CRX.7	1.75e-101	-1.04281	0.034	0.246	4.51e-97	7	CRX	T2
TOP2A.7	2.14e-36	-1.06647	0.056	0.16	5.52e-32	7	TOP2A	T2
FOSB.3	5.99e-141	-1.07308	0.045	0.32	1.54e-136	7	FOSB	T2
BTG2.4	2.3e-119	-1.08587	0.197	0.461	5.93e-115	7	BTG2	T2
TUBB4B.7	3.12e-120	-1.08948	0.494	0.69	8.04e-116	7	TUBB4B	T2
AMER2.6	4.68e-96	-1.09129	0.32	0.536	1.21e-91	7	AMER2	T2
SOX9.7	1.3e-141	-1.09298	0.123	0.415	3.36e-137	7	SOX9	T2
DUSP1.3	6.69e-112	-1.10307	0.441	0.659	1.72e-107	7	DUSP1	T2
CENPF.7	1.77e-42	-1.10521	0.039	0.149	4.57e-38	7	CENPF	T2
SSX2IP.4	7.39e-151	-1.10645	0.065	0.357	1.9e-146	7	SSX2IP	T2
JUNB.3	1.72e-97	-1.1119	0.239	0.467	4.44e-93	7	JUNB	T2
GSTP1.4	2.71e-212	-1.11659	0.519	0.802	6.97e-208	7	GSTP1	T2
RP1.7	2.01e-77	-1.12371	0.02	0.186	5.17e-73	7	RP1	T2
GPM6B.6	5.65e-170	-1.12655	0.254	0.575	1.46e-165	7	GPM6B	T2
CADM1.1	8.61e-215	-1.13402	0.226	0.601	2.22e-210	7	CADM1	T2
EPB41L2.4	1.21e-147	-1.14812	0.075	0.365	3.11e-143	7	EPB41L2	T2
SELENOP.5	5.17e-175	-1.15956	0.078	0.405	1.33e-170	7	SELENOP	T2
FXYD1.4	8.38e-193	-1.17018	0.052	0.398	2.16e-188	7	FXYD1	T2
FAM161A.7	2.43e-146	-1.2155	0.095	0.386	6.27e-142	7	FAM161A	T2
EGR1.6	1.05e-97	-1.21586	0.093	0.31	2.71e-93	7	EGR1	T2
NR2E3.7	4.83e-79	-1.2266	0.023	0.191	1.24e-74	7	NR2E3	T2
MEG3.2	8.94e-184	-1.26155	0.23	0.569	2.3e-179	7	MEG3	T2
PIK3R1.4	1.21e-188	-1.29599	0.133	0.481	3.12e-184	7	PIK3R1	T2
DCT.7	1.73e-71	-1.31206	0.018	0.173	4.46e-67	7	DCT	T2
ID3.6	5.93e-100	-1.31667	0.115	0.344	1.53e-95	7	ID3	T2
HMGB2.4	4.9e-110	-1.32612	0.374	0.599	1.26e-105	7	HMGB2	T2
ASCL1.6	1.4e-133	-1.33417	0.163	0.436	3.6e-129	7	ASCL1	T2
HIST1H4C.4	4.09e-78	-1.40123	0.435	0.635	1.05e-73	7	HIST1H4C	T2
TUBA1B.3	7.08e-220	-1.42452	0.656	0.829	1.82e-215	7	TUBA1B	T2
AL451062.1.7	8.2e-90	-1.42878	0.039	0.231	2.11e-85	7	AL451062.1	T2
CRABP2.7	3.9e-107	-1.43094	0.053	0.278	1.01e-102	7	CRABP2	T2
RAX.2	1.12e-265	-1.47497	0.134	0.551	2.87e-261	7	RAX	T2
HES4.7	9.08e-214	-1.49868	0.147	0.514	2.34e-209	7	HES4	T2
ROM1.7	7.16e-105	-1.50935	0.037	0.253	1.84e-100	7	ROM1	T2
SAT1.7	1.23e-111	-1.52174	0.233	0.479	3.16e-107	7	SAT1	T2
NEUROD1.7	5.07e-62	-1.53589	0.296	0.429	1.31e-57	7	NEUROD1	T2
TF.7	2.54e-113	-1.57234	0.065	0.303	6.54e-109	7	TF	T2
ID1.4	5.65e-217	-1.57838	0.132	0.498	1.45e-212	7	ID1	T2
CYR61.6	3.68e-155	-1.60721	0.045	0.331	9.48e-151	7	CYR61	T2
CKB.2	0	-1.60814	0.924	0.984	0	7	CKB	T2
TTYH1.7	5.08e-247	-1.66158	0.144	0.533	1.31e-242	7	TTYH1	T2
SFRP2.7	4.01e-179	-1.66436	0.108	0.43	1.03e-174	7	SFRP2	T2
SPP1.7	6.54e-202	-1.73607	0.227	0.558	1.68e-197	7	SPP1	T2
ZFP36L1.7	1.58e-228	-1.77265	0.101	0.473	4.06e-224	7	ZFP36L1	T2
PDC.7	8.39e-90	-1.78235	0.078	0.277	2.16e-85	7	PDC	T2
OTX2.7	3.71e-162	-1.85509	0.089	0.386	9.57e-158	7	OTX2	T2
SOX2.7	7.91e-220	-1.8835	0.241	0.571	2.04e-215	7	SOX2	T2
GNB3.7	3.65e-109	-1.89053	0.134	0.362	9.4e-105	7	GNB3	T2
VIM.7	1.33e-234	-1.98104	0.657	0.824	3.43e-230	7	VIM	T2
AIPL1.7	5.24e-116	-2.07623	0.076	0.311	1.35e-111	7	AIPL1	T2
FABP7.4	9.33e-187	-2.08961	0.349	0.649	2.4e-182	7	FABP7	T2
HES5.7	5.78e-137	-2.22855	0.118	0.387	1.49e-132	7	HES5	T2
FOS.5	2.07e-257	-2.23389	0.416	0.717	5.34e-253	7	FOS	T2
ZFP36L2.5	0	-2.37794	0.148	0.633	0	7	ZFP36L2	T2
CCND1.7	1.85e-273	-2.37873	0.173	0.575	4.78e-269	7	CCND1	T2
HES1.7	1.39e-206	-2.39571	0.135	0.478	3.59e-202	7	HES1	T2
NRL.7	1.16e-115	-2.50429	0.17	0.413	2.98e-111	7	NRL	T2
RCVRN.7	5.22e-118	-2.80285	0.195	0.434	1.34e-113	7	RCVRN	T2
TYMS.5	0	1.6345	0.865	0.254	0	8	TYMS	Proliferating retinal progenitor cells
PCLAF	0	1.6159	0.681	0.103	0	8	PCLAF	Proliferating retinal progenitor cells
HELLS	0	1.46187	0.744	0.196	0	8	HELLS	Proliferating retinal progenitor cells
CCND1.8	0	1.39806	0.989	0.542	0	8	CCND1	Proliferating retinal progenitor cells
GINS2	0	1.38209	0.696	0.167	0	8	GINS2	Proliferating retinal progenitor cells
PCNA	0	1.29105	0.729	0.252	0	8	PCNA	Proliferating retinal progenitor cells
UHRF1	0	1.21335	0.538	0.083	0	8	UHRF1	Proliferating retinal progenitor cells
MCM3	0	1.19938	0.615	0.155	0	8	MCM3	Proliferating retinal progenitor cells
DUT	0	1.19517	0.82	0.476	0	8	DUT	Proliferating retinal progenitor cells
MCM7	0	1.15012	0.728	0.289	0	8	MCM7	Proliferating retinal progenitor cells
E2F1	0	1.14358	0.547	0.115	0	8	E2F1	Proliferating retinal progenitor cells
TUBA1B.4	0	1.08692	0.993	0.816	0	8	TUBA1B	Proliferating retinal progenitor cells
HES1.8	0	1.05682	0.9	0.447	0	8	HES1	Proliferating retinal progenitor cells
RARRES2.2	0	1.04652	0.674	0.233	0	8	RARRES2	Proliferating retinal progenitor cells
NASP	0	1.03592	0.881	0.562	0	8	NASP	Proliferating retinal progenitor cells
DHFR	0	1.00933	0.492	0.12	0	8	DHFR	Proliferating retinal progenitor cells
MCM5	0	0.997337	0.52	0.118	0	8	MCM5	Proliferating retinal progenitor cells
METRN.6	0	0.97253	0.712	0.327	0	8	METRN	Proliferating retinal progenitor cells
MCM4	0	0.97194	0.491	0.109	0	8	MCM4	Proliferating retinal progenitor cells
CDT1	0	0.9698	0.494	0.109	0	8	CDT1	Proliferating retinal progenitor cells
MCM6	0	0.948616	0.449	0.099	0	8	MCM6	Proliferating retinal progenitor cells
CHEK1	0	0.929345	0.452	0.088	0	8	CHEK1	Proliferating retinal progenitor cells
ZFP36L1.8	0	0.916694	0.886	0.441	0	8	ZFP36L1	Proliferating retinal progenitor cells
BRCA1	0	0.916182	0.425	0.09	0	8	BRCA1	Proliferating retinal progenitor cells
SFRP2.8	0	0.906096	0.827	0.401	0	8	SFRP2	Proliferating retinal progenitor cells
SOX2.8	0	0.903299	0.968	0.542	0	8	SOX2	Proliferating retinal progenitor cells
ASCL1.7	1.87e-268	0.883727	0.806	0.41	4.81e-264	8	ASCL1	Proliferating retinal progenitor cells
UNG	0	0.877376	0.479	0.144	0	8	UNG	Proliferating retinal progenitor cells
COL2A1.6	0	0.876196	0.583	0.199	0	8	COL2A1	Proliferating retinal progenitor cells
RMI2	0	0.876036	0.414	0.067	0	8	RMI2	Proliferating retinal progenitor cells
DEK.3	0	0.869906	0.92	0.648	0	8	DEK	Proliferating retinal progenitor cells
PRSS23.2	2.48e-273	0.863905	0.519	0.193	6.39e-269	8	PRSS23	Proliferating retinal progenitor cells
CENPK	0	0.86018	0.43	0.085	0	8	CENPK	Proliferating retinal progenitor cells
CENPU	0	0.85349	0.464	0.106	0	8	CENPU	Proliferating retinal progenitor cells
CENPH	0	0.852227	0.464	0.118	0	8	CENPH	Proliferating retinal progenitor cells
VIM.8	0	0.851266	1	0.81	0	8	VIM	Proliferating retinal progenitor cells
FAM111B	0	0.845477	0.343	0.056	0	8	FAM111B	Proliferating retinal progenitor cells
FEN1	0	0.841353	0.48	0.158	0	8	FEN1	Proliferating retinal progenitor cells
MEST.7	1.93e-273	0.839807	0.876	0.532	4.98e-269	8	MEST	Proliferating retinal progenitor cells
MDK.3	9.49e-242	0.8315	0.871	0.569	2.45e-237	8	MDK	Proliferating retinal progenitor cells
ID3.7	1.09e-130	0.824823	0.575	0.325	2.81e-126	8	ID3	Proliferating retinal progenitor cells
RPA3	1.4e-252	0.823735	0.612	0.289	3.6e-248	8	RPA3	Proliferating retinal progenitor cells
COL9A1	0	0.821685	0.417	0.104	0	8	COL9A1	Proliferating retinal progenitor cells
ZFP36L2.6	1.49e-265	0.818284	0.953	0.6	3.84e-261	8	ZFP36L2	Proliferating retinal progenitor cells
MYB.7	1.16e-285	0.81183	0.652	0.271	2.99e-281	8	MYB	Proliferating retinal progenitor cells
CYR61.7	3.5e-270	0.800393	0.698	0.305	9e-266	8	CYR61	Proliferating retinal progenitor cells
SNRPB	2.45e-236	0.784725	0.798	0.529	6.32e-232	8	SNRPB	Proliferating retinal progenitor cells
[truncated: 9,364 more rows]

## Sheet: RPCs_T1_T2_T3
Pseudotime RPCs, T1, T2 and T3
	p_val	avg_log2FC	pct.1	pct.2	p_val_adj	cluster	gene
SAT1	0	1.55406	0.668	0.352	0	late RPCs	SAT1
FOS	0	1.33861	0.877	0.655	0	late RPCs	FOS
CYR61	0	1.32591	0.659	0.294	0	late RPCs	CYR61
TF	0	1.27611	0.584	0.242	0	late RPCs	TF
HES1	0	1.18646	0.861	0.484	0	late RPCs	HES1
CCND1	0	1.01809	0.95	0.637	0	late RPCs	CCND1
VIM	0	1.00338	0.998	0.871	0	late RPCs	VIM
SPP1	0	0.97604	0.933	0.607	0	late RPCs	SPP1
QDPR	0	0.966934	0.583	0.307	0	late RPCs	QDPR
TTYH1	0	0.959578	0.896	0.516	0	late RPCs	TTYH1
ZFP36L2	0	0.919694	0.943	0.678	0	late RPCs	ZFP36L2
ZFP36L1	0	0.89567	0.863	0.52	0	late RPCs	ZFP36L1
GAS1	9.07495e-240	0.874682	0.493	0.266	2.32908e-235	late RPCs	GAS1
PLP1	0	0.873801	0.485	0.191	0	late RPCs	PLP1
SOX2	0	0.835323	0.948	0.761	0	late RPCs	SOX2
JUN	0	0.831264	0.925	0.824	0	late RPCs	JUN
DUSP1	1.4302e-232	0.828544	0.735	0.577	3.67061e-228	late RPCs	DUSP1
MCAM	1.46787e-232	0.825487	0.367	0.151	3.76728e-228	late RPCs	MCAM
EGR1	1.24133e-162	0.809853	0.472	0.286	3.18588e-158	late RPCs	EGR1
ID1	0	0.8079	0.711	0.465	0	late RPCs	ID1
SOX9	0	0.798387	0.729	0.441	0	late RPCs	SOX9
GPM6B	0	0.786078	0.82	0.576	0	late RPCs	GPM6B
JUNB	2.32935e-113	0.783387	0.498	0.366	5.97827e-109	late RPCs	JUNB
FOSB	1.28875e-207	0.762346	0.423	0.209	3.30759e-203	late RPCs	FOSB
BAMBI	2.74064e-230	0.761341	0.509	0.283	7.03385e-226	late RPCs	BAMBI
HES4	0	0.760931	0.788	0.529	0	late RPCs	HES4
LINC00461	1.11307e-281	0.747996	0.719	0.489	2.8567e-277	late RPCs	LINC00461
NR4A1	8.21861e-183	0.738854	0.248	0.081	2.10931e-178	late RPCs	NR4A1
PRSS35	3.7837e-221	0.725716	0.447	0.214	9.71086e-217	late RPCs	PRSS35
LUM	2.86268e-186	0.724567	0.237	0.07	7.34707e-182	late RPCs	LUM
PMEPA1	0	0.714174	0.81	0.585	0	late RPCs	PMEPA1
GATB	5.64097e-245	0.710531	0.534	0.289	1.44775e-240	late RPCs	GATB
KDR	6.15178e-229	0.704028	0.407	0.18	1.57885e-224	late RPCs	KDR
TAGLN3	1.96259e-200	-0.703174	0.249	0.45	5.03699e-196	late RPCs	TAGLN3
MFNG	0	-0.708327	0.041	0.237	0	late RPCs	MFNG
AMER2	1.9589e-96	-0.734752	0.374	0.508	5.02752e-92	late RPCs	AMER2
PRDM13	3.84451e-224	-0.737323	0.012	0.131	9.86693e-220	late RPCs	PRDM13
NRL	3.13654e-65	-0.741408	0.207	0.316	8.04993e-61	late RPCs	NRL
CSRP2	1.48878e-87	-0.758857	0.582	0.679	3.82097e-83	late RPCs	CSRP2
FAM162A	1.62377e-116	-0.776452	0.253	0.399	4.1674e-112	late RPCs	FAM162A
SOX4	7.02303e-176	-0.781085	0.963	0.97	1.80246e-171	late RPCs	SOX4
CADPS	7.14542e-250	-0.782252	0.053	0.226	1.83387e-245	late RPCs	CADPS
BNIP3	2.7037e-136	-0.812954	0.512	0.639	6.93905e-132	late RPCs	BNIP3
MLLT11	6.80724e-207	-0.819077	0.283	0.483	1.74708e-202	late RPCs	MLLT11
SOX11	2.00761e-154	-0.824701	0.602	0.72	5.15254e-150	late RPCs	SOX11
SRRM4	0	-0.8453	0.101	0.34	0	late RPCs	SRRM4
RBP1	0	-0.846739	0.879	0.918	0	late RPCs	RBP1
ATP1A3	0	-0.85096	0.063	0.274	0	late RPCs	ATP1A3
LINC00599	8.12091e-302	-0.85925	0.064	0.267	2.08423e-297	late RPCs	LINC00599
FAM89A	2.66796e-184	-0.869377	0.138	0.313	6.84733e-180	late RPCs	FAM89A
SH3BGRL3	6.46076e-201	-0.876029	0.352	0.535	1.65815e-196	late RPCs	SH3BGRL3
MYBL1	1.18402e-187	-0.876592	0.129	0.296	3.03878e-183	late RPCs	MYBL1
SYP	6.84255e-288	-0.903354	0.089	0.3	1.75614e-283	late RPCs	SYP
DLL3	0	-0.939982	0.09	0.31	0	late RPCs	DLL3
STMN2	6.98562e-128	-0.979114	0.409	0.547	1.79286e-123	late RPCs	STMN2
SCG3	0	-1.03972	0.134	0.44	0	late RPCs	SCG3
CCNG2	0	-1.07408	0.181	0.452	0	late RPCs	CCNG2
HES6	3.48479e-221	-1.11119	0.541	0.686	8.94371e-217	late RPCs	HES6
CD24	1.8227e-304	-1.18631	0.212	0.448	4.67797e-300	late RPCs	CD24
FABP7	5.45818e-07	-1.23877	0.693	0.598	0.0140084	late RPCs	FABP7
INSM1	0	-1.24959	0.097	0.389	0	late RPCs	INSM1
VXN	0	-1.32061	0.028	0.287	0	late RPCs	VXN
PTF1A	9.02035e-295	-1.32154	0.015	0.169	2.31507e-290	late RPCs	PTF1A
FAM131C	0	-1.34995	0.046	0.32	0	late RPCs	FAM131C
GADD45A	0	-1.39571	0.177	0.415	0	late RPCs	GADD45A
PCBP4	0	-1.56511	0.216	0.54	0	late RPCs	PCBP4
GADD45G	0	-1.60981	0.208	0.512	0	late RPCs	GADD45G
OTX2	0	-2.01692	0.119	0.429	0	late RPCs	OTX2
NEUROD1	0	-2.03871	0.13	0.474	0	late RPCs	NEUROD1
ATOH7	0	-2.20109	0.037	0.234	0	late RPCs	ATOH7
NEUROD4	0	-2.41546	0.07	0.476	0	late RPCs	NEUROD4
SFRP2	7.66529e-175	0.969138	0.852	0.635	1.9673e-170	early RPCs	SFRP2
DAPL1	4.57408e-221	0.92932	0.805	0.557	1.17394e-216	early RPCs	DAPL1
ID3	5.53086e-103	0.910057	0.602	0.399	1.41949e-98	early RPCs	ID3
KPNA2	1.13981e-28	-0.768763	0.145	0.24	2.92533e-24	early RPCs	KPNA2
SOX4.1	4.55997e-112	-0.778035	0.954	0.968	1.17032e-107	early RPCs	SOX4
VXN.1	1.00785e-65	-0.832098	0.024	0.156	2.58664e-61	early RPCs	VXN
FAM131C.1	7.09491e-83	-0.91806	0.024	0.185	1.82091e-78	early RPCs	FAM131C
INSM1.1	1.10666e-95	-0.950032	0.056	0.248	2.84024e-91	early RPCs	INSM1
HIST1H4C	6.96263e-08	-0.976063	0.535	0.57	0.00178696	early RPCs	HIST1H4C
PTTG1	7.36392e-27	-1.00544	0.133	0.22	1.88995e-22	early RPCs	PTTG1
PCBP4.1	2.03064e-71	-1.01463	0.206	0.377	5.21164e-67	early RPCs	PCBP4
GADD45A.1	1.52204e-66	-1.03046	0.14	0.3	3.90631e-62	early RPCs	GADD45A
RASD1	2.98416e-97	-1.04743	0.077	0.284	7.65885e-93	early RPCs	RASD1
UBE2S	5.25865e-65	-1.04949	0.281	0.44	1.34963e-60	early RPCs	UBE2S
RGS16	1.69311e-187	-1.29549	0.421	0.697	4.34538e-183	early RPCs	RGS16
OTX2.1	8.57152e-88	-1.4613	0.09	0.277	2.19988e-83	early RPCs	OTX2
GADD45G.1	6.04757e-140	-1.48781	0.111	0.373	1.55211e-135	early RPCs	GADD45G
HES6.1	7.26177e-162	-1.5354	0.392	0.635	1.86373e-157	early RPCs	HES6
NEUROD1.1	2.03388e-111	-1.55752	0.088	0.306	5.21994e-107	early RPCs	NEUROD1
ATOH7.1	9.79223e-41	-1.65957	0.038	0.134	2.51318e-36	early RPCs	ATOH7
NEUROD4.1	2.23238e-108	-1.6834	0.062	0.272	5.72941e-104	early RPCs	NEUROD4
ATOH7.2	0	2.7096	0.421	0.083	0	T1	ATOH7
HES6.2	0	1.9038	0.972	0.557	0	T1	HES6
GADD45A.2	0	1.67784	0.642	0.233	0	T1	GADD45A
MYBL1.1	0	1.66433	0.66	0.143	0	T1	MYBL1
NEUROD1.2	0	1.55297	0.65	0.23	0	T1	NEUROD1
HIST1H4C.1	3.05801e-29	1.32566	0.638	0.556	7.8484e-25	T1	HIST1H4C
UBE2S.1	4.27229e-122	1.26143	0.627	0.392	1.09648e-117	T1	UBE2S
OLIG2	0	1.1485	0.413	0.053	0	T1	OLIG2
MFAP4	0	1.14147	0.445	0.072	0	T1	MFAP4
INSM1.2	3.35581e-282	1.13053	0.536	0.183	8.61268e-278	T1	INSM1
TUBA1B	1.5686e-144	1.0573	0.9	0.828	4.02582e-140	T1	TUBA1B
SH3BGRL3.1	1.46766e-178	1.01093	0.682	0.399	3.76675e-174	T1	SH3BGRL3
HMGN2	2.77023e-186	1.00552	0.943	0.867	7.10981e-182	T1	HMGN2
TRH	1.59568e-93	0.997651	0.547	0.342	4.0953e-89	T1	TRH
DLL1	0	0.957673	0.405	0.081	0	T1	DLL1
E2F1	1.51593e-298	0.951136	0.572	0.193	3.89063e-294	T1	E2F1
SHD	0	0.949218	0.451	0.095	0	T1	SHD
NEUROG2	0	0.94508	0.305	0.05	0	T1	NEUROG2
RGS16.1	6.60694e-132	0.877889	0.873	0.633	1.69567e-127	T1	RGS16
UBE2T	6.0493e-153	0.873649	0.401	0.163	1.55255e-148	T1	UBE2T
DLL4	1.05855e-273	0.872497	0.435	0.121	2.71676e-269	T1	DLL4
GADD45G.2	2.24746e-141	0.863607	0.605	0.305	5.76811e-137	T1	GADD45G
MIAT	3.78793e-139	0.862814	0.889	0.641	9.72173e-135	T1	MIAT
PTMA	0	0.840698	1	0.998	0	T1	PTMA
IDH2	1.45686e-209	0.824491	0.615	0.289	3.73904e-205	T1	IDH2
HIST1H1D	1.07647e-57	0.819001	0.379	0.224	2.76276e-53	T1	HIST1H1D
VXN.2	1.27872e-287	0.814658	0.42	0.104	3.28183e-283	T1	VXN
PCLAF	5.16827e-118	0.791906	0.406	0.184	1.32644e-113	T1	PCLAF
PMAIP1	3.65319e-221	0.790711	0.44	0.146	9.37591e-217	T1	PMAIP1
CLDN5	6.2766e-56	0.788973	0.137	0.048	1.61089e-51	T1	CLDN5
VSTM2B	2.68948e-198	0.77634	0.543	0.222	6.90256e-194	T1	VSTM2B
MAD2L1	6.38276e-136	0.773063	0.44	0.198	1.63814e-131	T1	MAD2L1
HSP90AA1	1.55484e-171	0.772751	0.994	0.975	3.99048e-167	T1	HSP90AA1
FAM131C.2	2.42348e-198	0.770777	0.412	0.132	6.21986e-194	T1	FAM131C
SCG3.1	4.2041e-185	0.74818	0.544	0.23	1.07898e-180	T1	SCG3
TTC14	7.15859e-140	0.74485	0.627	0.349	1.83725e-135	T1	TTC14
PTTG1.1	1.41548e-114	0.737527	0.408	0.184	3.63283e-110	T1	PTTG1
H2AFZ	6.7081e-120	0.736456	0.924	0.87	1.72163e-115	T1	H2AFZ
CCDC34	1.90936e-90	0.732674	0.664	0.464	4.90037e-86	T1	CCDC34
PBK	2.2331e-166	0.722889	0.299	0.089	5.73124e-162	T1	PBK
HMGB3	1.69046e-123	0.715527	0.605	0.354	4.33855e-119	T1	HMGB3
MEG3	4.46936e-58	-0.711718	0.54	0.638	1.14706e-53	T1	MEG3
LIMCH1	2.09098e-64	-0.716072	0.22	0.4	5.3665e-60	T1	LIMCH1
AL391650.1	1.3871e-67	-0.717458	0.108	0.285	3.55998e-63	T1	AL391650.1
QDPR.1	2.33385e-62	-0.722093	0.309	0.485	5.98982e-58	T1	QDPR
METRN	3.29157e-60	-0.724912	0.358	0.503	8.44781e-56	T1	METRN
BAMBI.1	1.79427e-53	-0.738918	0.288	0.428	4.60498e-49	T1	BAMBI
EGR1.1	4.71072e-30	-0.74333	0.305	0.403	1.20901e-25	T1	EGR1
WIF1	2.69217e-44	-0.784694	0.048	0.17	6.90947e-40	T1	WIF1
ID1.1	1.13312e-61	-0.792174	0.519	0.616	2.90814e-57	T1	ID1
C1orf61	1.15556e-45	-0.800339	0.177	0.321	2.96574e-41	T1	C1orf61
FOSB.1	1.11055e-57	-0.800512	0.189	0.349	2.85022e-53	T1	FOSB
MGARP	3.2756e-126	-0.816558	0.543	0.711	8.40682e-122	T1	MGARP
JUN.1	7.46422e-116	-0.825422	0.84	0.887	1.91569e-111	T1	JUN
TRPM3	1.45289e-78	-0.83618	0.146	0.343	3.72883e-74	T1	TRPM3
ZFP36L2.1	2.34208e-116	-0.847496	0.771	0.837	6.01094e-112	T1	ZFP36L2
VIM.1	1.05321e-201	-0.85728	0.976	0.94	2.70306e-197	T1	VIM
SOX9.1	1.09024e-106	-0.864979	0.427	0.628	2.7981e-102	T1	SOX9
HES4.1	6.56692e-113	-0.872715	0.517	0.697	1.6854e-108	T1	HES4
ZFP36L1.1	2.35352e-135	-0.949609	0.597	0.731	6.04032e-131	T1	ZFP36L1
DKK3	3.27346e-153	-0.964829	0.544	0.719	8.40133e-149	T1	DKK3
SPP1.1	1.89392e-176	-1.01608	0.636	0.813	4.86074e-172	T1	SPP1
PLP1.1	4.24769e-128	-1.06672	0.113	0.39	1.09017e-123	T1	PLP1
SFRP2.1	4.22527e-112	-1.12104	0.563	0.677	1.08441e-107	T1	SFRP2
DAPL1.1	4.27333e-165	-1.15239	0.347	0.621	1.09675e-160	T1	DAPL1
PRSS35.1	4.26405e-122	-1.20818	0.118	0.376	1.09437e-117	T1	PRSS35
CYR61.1	2.79747e-104	-1.20905	0.326	0.525	7.17971e-100	T1	CYR61
FOS.1	3.78701e-122	-1.23838	0.719	0.79	9.71935e-118	T1	FOS
TTYH1.1	8.96668e-294	-1.39508	0.458	0.768	2.3013e-289	T1	TTYH1
SAT1.1	1.68735e-107	-1.41033	0.347	0.556	4.3306e-103	T1	SAT1
ID3.1	4.02521e-79	-1.43537	0.276	0.445	1.03307e-74	T1	ID3
FABP7.1	6.82871e-130	-1.72905	0.467	0.675	1.75259e-125	T1	FABP7
TF.1	2.72768e-162	-1.75668	0.159	0.473	7.00058e-158	T1	TF
HES1.1	7.47125e-210	-1.76354	0.473	0.728	1.9175e-205	T1	HES1
PTF1A.1	0	3.15367	0.845	0.026	0	T2	PTF1A
PRDM13.1	0	2.33439	0.724	0.015	0	T2	PRDM13
STMN2.1	0	2.30726	0.925	0.435	0	T2	STMN2
CCK	0	2.24342	0.254	0.02	0	T2	CCK
FAM162A.1	0	2.08635	0.795	0.281	0	T2	FAM162A
NEUROD4.2	0	2.01171	0.858	0.2	0	T2	NEUROD4
SPATS2L	0	1.9688	0.598	0.049	0	T2	SPATS2L
IGFBP2	1.1646e-227	1.96301	0.829	0.562	2.98895e-223	T2	IGFBP2
CD9	0	1.93947	0.454	0.062	0	T2	CD9
BNIP3.1	0	1.88568	0.93	0.54	0	T2	BNIP3
SOX11.1	0	1.86425	0.955	0.63	0	T2	SOX11
HIF1A	0	1.8341	0.872	0.422	0	T2	HIF1A
GATM	0	1.74713	0.561	0.057	0	T2	GATM
CD24.1	0	1.69247	0.754	0.281	0	T2	CD24
THBS3	0	1.66709	0.62	0.045	0	T2	THBS3
PPP1R14A	0	1.65536	0.499	0.019	0	T2	PPP1R14A
DNM1	0	1.65495	0.532	0.055	0	T2	DNM1
ACKR3	0	1.61168	0.492	0.041	0	T2	ACKR3
PGK1	0	1.59954	0.925	0.595	0	T2	PGK1
KIRREL2	0	1.55564	0.517	0.017	0	T2	KIRREL2
TNNI1	0	1.54449	0.333	0.013	0	T2	TNNI1
ONECUT2	0	1.53818	0.364	0.059	0	T2	ONECUT2
MLLT11.1	0	1.53586	0.784	0.339	0	T2	MLLT11
MIF	2.74666e-214	1.50117	0.858	0.614	7.04931e-210	T2	MIF
ST18	0	1.50019	0.554	0.048	0	T2	ST18
GAL	0	1.45064	0.242	0.012	0	T2	GAL
APLP1	0	1.44911	0.621	0.115	0	T2	APLP1
CXXC5	0	1.43277	0.894	0.518	0	T2	CXXC5
TFAP2C	0	1.43021	0.449	0.017	0	T2	TFAP2C
ELAVL3	0	1.42016	0.629	0.138	0	T2	ELAVL3
ENO1	0	1.41873	0.982	0.906	0	T2	ENO1
CDKN1C	6.75344e-35	1.39433	0.446	0.314	1.73327e-30	T2	CDKN1C
PTMS	8.79897e-302	1.3915	0.968	0.784	2.25826e-297	T2	PTMS
LOXL1	0	1.36379	0.553	0.139	0	T2	LOXL1
PPP1R14C	0	1.36038	0.348	0.015	0	T2	PPP1R14C
PDLIM4	4.72699e-230	1.35653	0.646	0.267	1.21318e-225	T2	PDLIM4
RNF165	1.03387e-286	1.35391	0.753	0.308	2.65344e-282	T2	RNF165
TPI1	0	1.33437	0.977	0.851	0	T2	TPI1
RBP1.1	0	1.32957	0.982	0.889	0	T2	RBP1
TMSB4X	1.05883e-211	1.31304	0.981	0.95	2.71748e-207	T2	TMSB4X
NREP	9.33827e-291	1.30543	0.88	0.499	2.39667e-286	T2	NREP
GADD45A.3	3.37457e-209	1.27844	0.639	0.253	8.66083e-205	T2	GADD45A
SLC16A3	0	1.27282	0.44	0.067	0	T2	SLC16A3
RUNX1T1	0	1.26796	0.446	0.04	0	T2	RUNX1T1
LIMD2	1.75056e-246	1.26009	0.626	0.23	4.49281e-242	T2	LIMD2
CCNG2.1	9.59941e-256	1.25378	0.699	0.268	2.46369e-251	T2	CCNG2
NDUFA4L2	1.8932e-294	1.25152	0.184	0.013	4.85891e-290	T2	NDUFA4L2
PARP1	7.6839e-232	1.24998	0.841	0.511	1.97207e-227	T2	PARP1
BASP1	2.08496e-251	1.24553	0.921	0.681	5.35105e-247	T2	BASP1
TMSB10	0	1.23204	0.999	0.964	0	T2	TMSB10
MSRB1	0	1.21898	0.401	0.053	0	T2	MSRB1
SETBP1	0	1.21584	0.556	0.121	0	T2	SETBP1
SOX4.2	6.53328e-268	1.18723	0.994	0.964	1.67677e-263	T2	SOX4
FNDC5	0	1.14709	0.433	0.071	0	T2	FNDC5
PPP1R14B	9.76459e-195	1.14121	0.765	0.429	2.50608e-190	T2	PPP1R14B
ATP1A3.1	0	1.14031	0.579	0.122	0	T2	ATP1A3
HOMER3	1.36315e-226	1.12548	0.531	0.17	3.49854e-222	T2	HOMER3
ATP6V0B	2.25486e-218	1.12074	0.802	0.431	5.78709e-214	T2	ATP6V0B
NHLH1	0	1.11927	0.362	0.029	0	T2	NHLH1
TAGLN3.1	1.88187e-216	1.11475	0.703	0.308	4.82981e-212	T2	TAGLN3
TSC22D1	4.56554e-165	1.11265	0.843	0.582	1.17175e-160	T2	TSC22D1
ETFB	3.54834e-213	1.10633	0.842	0.528	9.1068e-209	T2	ETFB
SH3BGRL3.2	2.65346e-172	1.09326	0.74	0.408	6.8101e-168	T2	SH3BGRL3
SPON2	0	1.09172	0.324	0.018	0	T2	SPON2
CADPS.1	0	1.08529	0.496	0.1	0	T2	CADPS
SLCO5A1	1.20846e-294	1.05988	0.509	0.121	3.1015e-290	T2	SLCO5A1
HILPDA	3.32199e-142	1.05515	0.454	0.171	8.5259e-138	T2	HILPDA
PCSK1N	3.07712e-163	1.0547	0.54	0.213	7.89744e-159	T2	PCSK1N
BTBD17	0	1.05445	0.365	0.058	0	T2	BTBD17
STC2	0	1.04657	0.313	0.018	0	T2	STC2
FAM131C.3	1.29996e-171	1.03042	0.457	0.142	3.33636e-167	T2	FAM131C
NOVA2	0	1.03022	0.403	0.066	0	T2	NOVA2
SSR4	2.5982e-200	1.02734	0.854	0.556	6.66829e-196	T2	SSR4
PTPRF	4.0876e-204	1.02028	0.647	0.265	1.04908e-199	T2	PTPRF
GPC2	1.78768e-259	1.01926	0.553	0.159	4.58807e-255	T2	GPC2
MARCKSL1	2.50359e-279	1.01693	0.984	0.917	6.42546e-275	T2	MARCKSL1
CELF3	0	1.00917	0.42	0.054	0	T2	CELF3
GAPDH	2.47497e-297	1.00565	1	0.99	6.352e-293	T2	GAPDH
LDHA	4.66669e-218	1.003	0.964	0.827	1.19771e-213	T2	LDHA
HSPB1	1.10933e-72	1.00189	0.664	0.464	2.84708e-68	T2	HSPB1
DDIT4	7.99975e-105	1.00116	0.822	0.616	2.05314e-100	T2	DDIT4
DUSP26	6.89371e-254	0.998935	0.428	0.098	1.76927e-249	T2	DUSP26
TBX3	2.52319e-182	0.991234	0.35	0.089	6.47576e-178	T2	TBX3
VAX2	2.23586e-188	0.982472	0.44	0.133	5.73833e-184	T2	VAX2
PFKFB3	0	0.9773	0.405	0.062	0	T2	PFKFB3
CAMK4	4.37801e-267	0.962295	0.408	0.087	1.12362e-262	T2	CAMK4
GPI	2.5126e-166	0.959791	0.557	0.22	6.44859e-162	T2	GPI
2011-09-01	2.75557e-122	0.958806	0.675	0.394	7.07217e-118	T2	2011-09-01
CRMP1	3.1514e-174	0.95518	0.68	0.327	8.08806e-170	T2	CRMP1
CYB5A	1.83371e-185	0.955063	0.362	0.094	4.70621e-181	T2	CYB5A
CABP1	0	0.949725	0.305	0.018	0	T2	CABP1
LRRN3	4.94506e-172	0.948302	0.586	0.225	1.26915e-167	T2	LRRN3
CCDC85B	9.85859e-186	0.937845	0.52	0.185	2.53021e-181	T2	CCDC85B
ARRB2	1.35382e-247	0.937606	0.395	0.086	3.47458e-243	T2	ARRB2
VASH2	2.10401e-274	0.933919	0.391	0.075	5.39994e-270	T2	VASH2
JPT1	1.8815e-168	0.932313	0.836	0.514	4.82886e-164	T2	JPT1
SLC6A9	0	0.924577	0.304	0.03	0	T2	SLC6A9
SEC61G	9.56072e-195	0.92248	0.911	0.671	2.45376e-190	T2	SEC61G
ORAI2	1.01427e-186	0.921228	0.421	0.122	2.60312e-182	T2	ORAI2
SCRN1	2.61984e-182	0.9201	0.504	0.17	6.72382e-178	T2	SCRN1
KDM6B	9.94204e-212	0.917574	0.488	0.144	2.55162e-207	T2	KDM6B
CCDC88A	2.03577e-135	0.914584	0.824	0.56	5.2248e-131	T2	CCDC88A
RBFOX3	0	0.911781	0.288	0.021	0	T2	RBFOX3
VEGFA	1.62717e-97	0.910563	0.505	0.245	4.17614e-93	T2	VEGFA
CELF4	2.18972e-264	0.903369	0.372	0.069	5.61992e-260	T2	CELF4
GADD45G.3	3.15653e-145	0.903337	0.674	0.314	8.10125e-141	T2	GADD45G
LINC00599.1	9.41211e-278	0.902889	0.522	0.124	2.41562e-273	T2	LINC00599
AL391650.1.1	1.32528e-155	0.895396	0.586	0.242	3.40132e-151	T2	AL391650.1
NRXN3	0	0.891697	0.344	0.048	0	T2	NRXN3
MIR7-3HG	2.9883e-270	0.890871	0.348	0.059	7.66946e-266	T2	MIR7-3HG
STMN4	6.15833e-104	0.89006	0.354	0.131	1.58054e-99	T2	STMN4
VIPR2	3.10512e-236	0.884023	0.424	0.096	7.96929e-232	T2	VIPR2
BARHL2	0	0.877807	0.269	0.016	0	T2	BARHL2
RCOR2	2.16156e-137	0.876616	0.561	0.25	5.54764e-133	T2	RCOR2
PHC2	2.23939e-129	0.875606	0.637	0.331	5.74738e-125	T2	PHC2
NNAT	1.44201e-102	0.875439	0.917	0.765	3.70092e-98	T2	NNAT
PCBP4.2	3.40777e-194	0.858527	0.749	0.326	8.74604e-190	T2	PCBP4
L1CAM	0	0.847026	0.275	0.025	0	T2	L1CAM
DPYSL4	3.20784e-152	0.845745	0.546	0.218	8.23291e-148	T2	DPYSL4
SCG3.2	5.30015e-170	0.843455	0.613	0.24	1.36028e-165	T2	SCG3
NKD2	0	0.84089	0.326	0.041	0	T2	NKD2
KIF1A	9.80988e-159	0.837453	0.5	0.185	2.51771e-154	T2	KIF1A
APBA2	3.16267e-220	0.824678	0.4	0.095	8.11699e-216	T2	APBA2
2006-09-01	1.10391e-132	0.821651	0.542	0.233	2.83319e-128	T2	2006-09-01
PTMA.1	0	0.817133	1	0.998	0	T2	PTMA
SLCO3A1	4.31603e-208	0.814102	0.286	0.053	1.10771e-203	T2	SLCO3A1
SEZ6L2	1.6123e-244	0.810129	0.362	0.07	4.13796e-240	T2	SEZ6L2
INA	3.07557e-169	0.809545	0.399	0.114	7.89345e-165	T2	INA
FSCN1	4.0291e-115	0.808826	0.68	0.388	1.03407e-110	T2	FSCN1
DYNC1H1	7.80425e-105	0.807179	0.627	0.364	2.00296e-100	T2	DYNC1H1
TLE3	1.40721e-91	0.806539	0.531	0.274	3.61161e-87	T2	TLE3
PLXNA2	0	0.797468	0.289	0.021	0	T2	PLXNA2
CHRNA3	5.49339e-255	0.796711	0.352	0.064	1.40988e-250	T2	CHRNA3
PKM	1.10347e-113	0.791753	0.884	0.714	2.83206e-109	T2	PKM
MGLL	2.13626e-135	0.791229	0.32	0.093	5.4827e-131	T2	MGLL
CHD4	1.4593e-106	0.784023	0.632	0.352	3.7453e-102	T2	CHD4
ZNF385A	1.24129e-126	0.783889	0.668	0.352	3.18577e-122	T2	ZNF385A
PFKP	3.17459e-280	0.770436	0.272	0.034	8.14759e-276	T2	PFKP
HES6.3	4.02667e-30	0.767112	0.712	0.595	1.03345e-25	T2	HES6
PAX6	4.26452e-149	0.764778	0.954	0.818	1.09449e-144	T2	PAX6
FSTL5	4.04781e-229	0.763589	0.301	0.052	1.03887e-224	T2	FSTL5
PTP4A3	3.28921e-192	0.763484	0.317	0.068	8.44176e-188	T2	PTP4A3
ZNF385D	2.00735e-91	0.762004	0.568	0.306	5.15187e-87	T2	ZNF385D
AP1S2	4.16436e-87	0.759482	0.471	0.232	1.06878e-82	T2	AP1S2
TFAP2B	8.64544e-127	0.746211	0.217	0.047	2.21885e-122	T2	TFAP2B
SCARB2	6.89989e-107	0.744104	0.754	0.484	1.77086e-102	T2	SCARB2
MIAT.1	4.90171e-125	0.743529	0.908	0.652	1.25802e-120	T2	MIAT
MTUS1	3.79845e-96	0.74183	0.517	0.247	9.74873e-92	T2	MTUS1
BZW2	9.67014e-131	0.739236	0.493	0.2	2.48184e-126	T2	BZW2
PODXL2	3.61528e-124	0.736998	0.441	0.167	9.27861e-120	T2	PODXL2
EPHA4	1.02117e-251	0.730497	0.276	0.04	2.62084e-247	T2	EPHA4
NOL4	4.61889e-137	0.728986	0.434	0.151	1.18544e-132	T2	NOL4
SCRT1	0	0.726172	0.255	0.013	0	T2	SCRT1
SLC25A6	9.08766e-143	0.723573	0.944	0.787	2.33235e-138	T2	SLC25A6
BCL7A	1.30002e-104	0.722265	0.569	0.284	3.33651e-100	T2	BCL7A
FTL	1.18424e-198	0.715448	0.99	0.939	3.03935e-194	T2	FTL
RAB3A	2.97589e-184	0.71438	0.274	0.053	7.63763e-180	T2	RAB3A
RGS16.2	1.63759e-78	0.712462	0.845	0.647	4.20287e-74	T2	RGS16
BSG	3.46652e-125	0.704319	0.928	0.773	8.89683e-121	T2	BSG
APCDD1L	8.90739e-270	0.703066	0.238	0.026	2.28608e-265	T2	APCDD1L
S100A6	1.30769e-29	0.702326	0.315	0.193	3.35618e-25	T2	S100A6
MIDN	6.31015e-95	0.702097	0.699	0.429	1.6195e-90	T2	MIDN
FAM57B	1.26835e-157	0.702024	0.381	0.11	3.25523e-153	T2	FAM57B
DACH1	4.43904e-54	-0.700615	0.293	0.513	1.13928e-49	T2	DACH1
NR2E1	4.84642e-59	-0.701123	0.036	0.248	1.24383e-54	T2	NR2E1
SORCS1	4.26363e-52	-0.701659	0.069	0.27	1.09426e-47	T2	SORCS1
DNAJB1	1.67736e-13	-0.703742	0.365	0.442	4.30494e-09	T2	DNAJB1
CLIC1	2.26667e-54	-0.704369	0.204	0.422	5.81741e-50	T2	CLIC1
E2F1.1	4.08393e-47	-0.708919	0.063	0.248	1.04814e-42	T2	E2F1
FAM111A	3.62264e-58	-0.714741	0.035	0.241	9.2975e-54	T2	FAM111A
MYBL1.2	2.13713e-40	-0.717624	0.05	0.212	5.48494e-36	T2	MYBL1
RHEB	3.55733e-63	-0.721423	0.455	0.624	9.12987e-59	T2	RHEB
SSX2IP	6.79979e-35	-0.722184	0.194	0.364	1.74517e-30	T2	SSX2IP
FABP5	2.77699e-56	-0.722565	0.464	0.633	7.12715e-52	T2	FABP5
BAZ2B	1.27914e-58	-0.72666	0.413	0.614	3.2829e-54	T2	BAZ2B
PCLAF.1	2.56159e-44	-0.735459	0.047	0.221	6.57431e-40	T2	PCLAF
TRPM3.1	1.03765e-43	-0.740454	0.144	0.334	2.66312e-39	T2	TRPM3
ISYNA1	3.25535e-57	-0.74426	0.199	0.423	8.35484e-53	T2	ISYNA1
IFITM3	1.32684e-66	-0.755267	0.023	0.247	3.40534e-62	T2	IFITM3
CRYM	4.06002e-56	-0.757456	0.018	0.211	1.042e-51	T2	CRYM
NR4A1.1	6.45657e-43	-0.76184	0.028	0.187	1.65708e-38	T2	NR4A1
ETV5	3.7283e-55	-0.764455	0.07	0.278	9.56869e-51	T2	ETV5
SOX8	1.48073e-48	-0.7647	0.042	0.222	3.80029e-44	T2	SOX8
ADAMTS6	1.34129e-58	-0.765414	0.069	0.285	3.44243e-54	T2	ADAMTS6
TBX2-AS1	1.99982e-65	-0.781332	0.157	0.411	5.13255e-61	T2	TBX2-AS1
CDH2	1.75074e-82	-0.781985	0.534	0.722	4.49327e-78	T2	CDH2
SPRY2	5.35834e-53	-0.784969	0.172	0.386	1.37522e-48	T2	SPRY2
ODF2L	8.60374e-68	-0.800821	0.094	0.342	2.20815e-63	T2	ODF2L
LINC00461.1	2.31502e-64	-0.802207	0.4	0.637	5.94151e-60	T2	LINC00461
LGR4	3.72276e-65	-0.805401	0.379	0.593	9.55447e-61	T2	LGR4
PYGL	5.86903e-67	-0.805414	0.024	0.249	1.50629e-62	T2	PYGL
HES4.2	6.61593e-76	-0.806344	0.441	0.694	1.69798e-71	T2	HES4
DBI	7.57827e-76	-0.808392	0.507	0.678	1.94496e-71	T2	DBI
LHX2	3.43313e-66	-0.818032	0.271	0.5	8.81114e-62	T2	LHX2
LUM.1	3.01019e-43	-0.818825	0.021	0.176	7.72564e-39	T2	LUM
PRSS23	4.34763e-52	-0.820448	0.136	0.342	1.11582e-47	T2	PRSS23
CRNDE	3.88536e-72	-0.822584	0.14	0.405	9.97178e-68	T2	CRNDE
CDK6	9.4531e-71	-0.831205	0.088	0.338	2.42614e-66	T2	CDK6
CA14	6.97638e-64	-0.833586	0.096	0.333	1.79049e-59	T2	CA14
MYO10	1.68858e-61	-0.836786	0.268	0.499	4.33374e-57	T2	MYO10
RLBP1	1.06105e-58	-0.838228	0.017	0.216	2.72318e-54	T2	RLBP1
MOB3B	1.55765e-72	-0.842361	0.042	0.289	3.99771e-68	T2	MOB3B
RARRES2	5.15877e-72	-0.85475	0.13	0.396	1.324e-67	T2	RARRES2
RNF180	7.46746e-66	-0.87522	0.101	0.339	1.91652e-61	T2	RNF180
HMGN2.1	1.75149e-82	-0.88835	0.833	0.879	4.4952e-78	T2	HMGN2
CREB5	3.40001e-68	-0.89317	0.078	0.321	8.72612e-64	T2	CREB5
LINC01833	9.58816e-86	-0.900468	0.305	0.581	2.4608e-81	T2	LINC01833
SMIM20	7.38143e-82	-0.904065	0.232	0.508	1.89444e-77	T2	SMIM20
B2M	1.45115e-79	-0.904431	0.151	0.432	3.72437e-75	T2	B2M
MCAM.1	1.01886e-62	-0.914886	0.063	0.29	2.6149e-58	T2	MCAM
TMEM37	6.05955e-82	-0.918813	0.017	0.277	1.55518e-77	T2	TMEM37
TOX3	2.1221e-82	-0.928189	0.27	0.544	5.44636e-78	T2	TOX3
WIF1.1	5.78753e-41	-0.931872	0.018	0.166	1.48537e-36	T2	WIF1
SMAD2	6.70113e-80	-0.935282	0.232	0.504	1.71984e-75	T2	SMAD2
PIK3R1	6.5872e-51	-0.936757	0.228	0.434	1.6906e-46	T2	PIK3R1
ZNF608	2.24559e-89	-0.938385	0.14	0.442	5.76331e-85	T2	ZNF608
DDHD1	1.58781e-70	-0.957061	0.252	0.501	4.0751e-66	T2	DDHD1
LGI4	9.97642e-80	-0.967978	0.103	0.381	2.56045e-75	T2	LGI4
REST	3.97548e-95	-0.971512	0.066	0.372	1.02031e-90	T2	REST
FBXW7	2.22115e-85	-0.973795	0.318	0.585	5.70057e-81	T2	FBXW7
FZD5	2.38652e-88	-0.974209	0.094	0.383	6.125e-84	T2	FZD5
VSX2	8.85505e-102	-1.00235	0.073	0.396	2.27265e-97	T2	VSX2
PTTG1.2	2.96054e-26	-1.01234	0.091	0.217	7.59823e-22	T2	PTTG1
MYB	1.42857e-104	-1.02074	0.159	0.493	3.66641e-100	T2	MYB
MAP1B	1.43477e-171	-1.02326	0.695	0.897	3.68234e-167	T2	MAP1B
AC009041.2	1.58883e-80	-1.02371	0.048	0.315	4.07772e-76	T2	AC009041.2
KDR.1	1.52644e-88	-1.0254	0.043	0.329	3.91761e-84	T2	KDR
CKB	1.65892e-290	-1.02577	0.972	0.997	4.25761e-286	T2	CKB
DEK	2.07416e-111	-1.03587	0.563	0.752	5.32334e-107	T2	DEK
SLC1A3	5.38697e-85	-1.04042	0.096	0.379	1.38257e-80	T2	SLC1A3
STON2	9.0211e-102	-1.04633	0.15	0.471	2.31527e-97	T2	STON2
ID1.2	1.03276e-109	-1.05526	0.298	0.628	2.65057e-105	T2	ID1
JUN.2	4.97731e-114	-1.06578	0.774	0.889	1.27743e-109	T2	JUN
BAMBI.2	2.49798e-85	-1.06774	0.145	0.432	6.41108e-81	T2	BAMBI
JUNB.1	2.41774e-46	-1.08661	0.278	0.453	6.20513e-42	T2	JUNB
IER2	1.76645e-93	-1.09331	0.464	0.68	4.53359e-89	T2	IER2
AES	5.83947e-146	-1.14261	0.215	0.597	1.4987e-141	T2	AES
CCDC34.1	1.19114e-99	-1.14276	0.199	0.507	3.05706e-95	T2	CCDC34
COL2A1	2.71937e-111	-1.14463	0.042	0.374	6.97927e-107	T2	COL2A1
HIST1H4C.2	4.00023e-13	-1.1649	0.533	0.567	1.02666e-08	T2	HIST1H4C
OTX2.2	4.25827e-19	-1.16974	0.16	0.258	1.09288e-14	T2	OTX2
SELENOP	8.95168e-132	-1.17916	0.227	0.59	2.29745e-127	T2	SELENOP
GATB.1	3.72159e-110	-1.18965	0.114	0.452	9.55145e-106	T2	GATB
QDPR.2	3.76373e-86	-1.19323	0.214	0.483	9.65962e-82	T2	QDPR
LIMCH1.1	1.64018e-114	-1.20456	0.062	0.403	4.20952e-110	T2	LIMCH1
TLE4	2.84487e-120	-1.20514	0.095	0.451	7.30136e-116	T2	TLE4
FOSB.2	3.9364e-97	-1.21956	0.051	0.352	1.01028e-92	T2	FOSB
MEG3.1	8.68179e-122	-1.23212	0.315	0.649	2.22818e-117	T2	MEG3
RAX	5.58996e-163	-1.28742	0.366	0.717	1.43466e-158	T2	RAX
GAS1.1	3.57986e-97	-1.29135	0.11	0.417	9.1877e-93	T2	GAS1
DUSP1.1	4.07728e-110	-1.29653	0.449	0.683	1.04643e-105	T2	DUSP1
PLP1.2	1.87985e-112	-1.30209	0.047	0.382	4.82463e-108	T2	PLP1
ID4	9.80802e-132	-1.32615	0.174	0.537	2.51723e-127	T2	ID4
EGR1.2	1.03912e-76	-1.34895	0.151	0.41	2.66691e-72	T2	EGR1
PRSS35.2	4.51247e-104	-1.35172	0.05	0.369	1.15813e-99	T2	PRSS35
SOX9.2	2.52557e-155	-1.35217	0.233	0.632	6.48188e-151	T2	SOX9
FXYD1	3.11511e-168	-1.41565	0.115	0.553	7.99492e-164	T2	FXYD1
GPM6B.1	1.42819e-190	-1.42102	0.376	0.74	3.66544e-186	T2	GPM6B
TTYH1.2	3.16233e-224	-1.54824	0.328	0.763	8.11612e-220	T2	TTYH1
TUBA1B.1	2.85223e-171	-1.6103	0.724	0.844	7.32025e-167	T2	TUBA1B
SOX2.1	2.38383e-273	-1.62549	0.561	0.89	6.11809e-269	T2	SOX2
ASCL1	1.04587e-190	-1.64038	0.275	0.693	2.68422e-186	T2	ASCL1
FABP7.2	5.5482e-97	-1.72655	0.412	0.67	1.42394e-92	T2	FABP7
SAT1.2	3.24134e-97	-1.8305	0.288	0.55	8.31891e-93	T2	SAT1
ID3.2	7.33139e-102	-1.8339	0.141	0.447	1.8816e-97	T2	ID3
ZFP36L1.2	7.5692e-280	-1.96994	0.232	0.751	1.94263e-275	T2	ZFP36L1
VIM.2	0	-1.98781	0.851	0.95	0	T2	VIM
TF.2	4.0456e-129	-2.03832	0.098	0.463	1.0383e-124	T2	TF
CYR61.2	1.65531e-201	-2.11055	0.054	0.535	4.24836e-197	T2	CYR61
SFRP2.2	2.1298e-265	-2.21177	0.186	0.699	5.46613e-261	T2	SFRP2
ZFP36L2.2	0	-2.3041	0.38	0.862	0	T2	ZFP36L2
SPP1.2	0	-2.3282	0.275	0.831	0	T2	SPP1
FOS.2	2.0431e-252	-2.5959	0.487	0.803	5.24361e-248	T2	FOS
HES1.2	8.49229e-267	-2.67797	0.237	0.733	2.17955e-262	T2	HES1
CCND1.1	0	-2.93317	0.252	0.857	0	T2	CCND1
OTX2.3	0	3.012	0.84	0.174	0	T3	OTX2
FABP7.3	2.31129e-154	2.8607	0.7	0.646	5.93194e-150	T3	FABP7
NEUROD4.3	0	2.60964	0.793	0.172	0	T3	NEUROD4
PCBP4.3	0	2.29487	0.873	0.287	0	T3	PCBP4
NEUROD1.3	0	2.29301	0.843	0.203	0	T3	NEUROD1
TFF1	0	2.15531	0.134	0	0	T3	TFF1
VXN.3	0	2.01684	0.608	0.077	0	T3	VXN
GADD45G.4	0	1.95992	0.786	0.279	0	T3	GADD45G
PIK3R1.1	0	1.89466	0.694	0.385	0	T3	PIK3R1
NRL.1	0	1.80023	0.572	0.212	0	T3	NRL
AMER2.1	0	1.77153	0.761	0.388	0	T3	AMER2
FAM89A.1	0	1.75967	0.538	0.17	0	T3	FAM89A
RCVRN	2.14258e-152	1.73388	0.474	0.236	5.49894e-148	T3	RCVRN
DCT	0	1.72941	0.224	0.028	0	T3	DCT
SYP.1	0	1.71074	0.586	0.126	0	T3	SYP
CSRP2.1	1.68212e-282	1.71067	0.783	0.602	4.31716e-278	T3	CSRP2
SSX2IP.1	0	1.69944	0.703	0.306	0	T3	SSX2IP
CRX	0	1.63339	0.507	0.038	0	T3	CRX
AL451062.1	0	1.56116	0.414	0.059	0	T3	AL451062.1
FAM131C.4	0	1.53419	0.491	0.12	0	T3	FAM131C
LINC00599.2	0	1.50337	0.513	0.103	0	T3	LINC00599
INSM1.3	0	1.47818	0.614	0.171	0	T3	INSM1
PRDM1	0	1.46614	0.359	0.033	0	T3	PRDM1
RXRG	0	1.44758	0.402	0.051	0	T3	RXRG
KCNK3	0	1.41025	0.454	0.036	0	T3	KCNK3
GNB3	1.86006e-279	1.39819	0.397	0.113	4.77384e-275	T3	GNB3
DLL3.1	0	1.39235	0.521	0.14	0	T3	DLL3
SLC38A5	0	1.36658	0.347	0.021	0	T3	SLC38A5
ATP1A3.2	0	1.36338	0.489	0.109	0	T3	ATP1A3
NEUROG1	0	1.35207	0.32	0.009	0	T3	NEUROG1
CCNG2.2	0	1.33931	0.621	0.254	0	T3	CCNG2
SRRM4.1	0	1.33414	0.566	0.156	0	T3	SRRM4
KLHDC8A	0	1.3185	0.417	0.037	0	T3	KLHDC8A
KLHL35	0	1.31163	0.318	0.018	0	T3	KLHL35
SSTR2	0	1.29666	0.323	0.037	0	T3	SSTR2
CADPS.2	0	1.2846	0.409	0.09	0	T3	CADPS
CD24.2	5.73793e-229	1.28134	0.576	0.279	1.47264e-224	T3	CD24
CHGB	0	1.27494	0.339	0.045	0	T3	CHGB
NLK	0	1.25919	0.414	0.051	0	T3	NLK
AIPL1	2.47392e-137	1.24938	0.274	0.094	6.34932e-133	T3	AIPL1
ATOH7.3	3.52243e-243	1.24671	0.348	0.091	9.04031e-239	T3	ATOH7
EML4	1.32702e-282	1.23761	0.514	0.194	3.4058e-278	T3	EML4
EPB41	3.26908e-259	1.21314	0.614	0.306	8.39008e-255	T3	EPB41
BSG.1	0	1.19346	0.886	0.77	0	T3	BSG
CPE	2.17438e-237	1.18214	0.591	0.294	5.58055e-233	T3	CPE
SOX4.3	0	1.17211	0.97	0.966	0	T3	SOX4
SCG3.3	0	1.17	0.592	0.222	0	T3	SCG3
NDRG1	1.3852e-273	1.15038	0.471	0.164	3.55512e-269	T3	NDRG1
HIST1H4C.3	0.00030637	1.14867	0.575	0.564	1	T3	HIST1H4C
PDE6H	5.36432e-121	1.14506	0.123	0.023	1.37675e-116	T3	PDE6H
MFNG.1	0	1.13474	0.436	0.084	0	T3	MFNG
SYT1	9.01678e-202	1.13108	0.771	0.641	2.31416e-197	T3	SYT1
LHX4	0	1.11449	0.349	0.017	0	T3	LHX4
MPPED2	3.13869e-234	1.0984	0.645	0.346	8.05544e-230	T3	MPPED2
2004-09-01	3.92879e-241	1.09272	0.423	0.141	1.00832e-236	T3	2004-09-01
TMX1	1.175e-211	1.07703	0.573	0.291	3.01564e-207	T3	TMX1
COL16A1	0	1.05002	0.306	0.03	0	T3	COL16A1
TULP1	1.77964e-245	1.03991	0.186	0.025	4.56745e-241	T3	TULP1
NFIB	1.25186e-120	1.03036	0.557	0.343	3.2129e-116	T3	NFIB
MIR7-3HG.1	0	0.999818	0.319	0.047	0	T3	MIR7-3HG
SAMD11	3.35603e-251	0.997438	0.38	0.11	8.61326e-247	T3	SAMD11
HMGA1	8.62765e-71	0.977018	0.643	0.473	2.21429e-66	T3	HMGA1
CRYBG3	1.40377e-201	0.970132	0.378	0.129	3.60278e-197	T3	CRYBG3
GRINA	2.59969e-228	0.942248	0.481	0.188	6.6721e-224	T3	GRINA
SEMA5A	3.31549e-164	0.941447	0.418	0.179	8.50921e-160	T3	SEMA5A
RHOBTB3	7.13696e-171	0.933298	0.672	0.433	1.8317e-166	T3	RHOBTB3
ATP2B1	4.50604e-169	0.929077	0.522	0.262	1.15648e-164	T3	ATP2B1
YPEL2	1.46003e-304	0.920864	0.346	0.077	3.74718e-300	T3	YPEL2
CADM2	3.97755e-168	0.915462	0.529	0.267	1.02084e-163	T3	CADM2
SLC1A7	0	0.910595	0.25	0.02	0	T3	SLC1A7
RASD1.1	3.34223e-174	0.903005	0.504	0.224	8.57783e-170	T3	RASD1
AGAP1	1.83117e-188	0.888542	0.361	0.126	4.69969e-184	T3	AGAP1
CADM3	7.06067e-148	0.881014	0.612	0.382	1.81212e-143	T3	CADM3
ROM1	5.23679e-216	0.879274	0.242	0.05	1.34402e-211	T3	ROM1
C11orf96	2.67573e-167	0.864311	0.254	0.07	6.86726e-163	T3	C11orf96
ZHX1	4.7394e-164	0.863439	0.43	0.187	1.21637e-159	T3	ZHX1
SESN3	4.19621e-90	0.862878	0.402	0.23	1.07696e-85	T3	SESN3
NEDD4L	1.58486e-170	0.861626	0.375	0.142	4.06753e-166	T3	NEDD4L
PAK3	1.86848e-164	0.859903	0.392	0.158	4.79545e-160	T3	PAK3
GUK1	1.14444e-109	0.859877	0.541	0.347	2.93721e-105	T3	GUK1
UNC119	3.8006e-121	0.85901	0.311	0.128	9.75423e-117	T3	UNC119
CALB1	2.5298e-96	0.852184	0.104	0.02	6.49272e-92	T3	CALB1
TPD52	1.31836e-197	0.851805	0.23	0.05	3.38356e-193	T3	TPD52
ACTC1	0	0.84365	0.197	0.013	0	T3	ACTC1
IGSF21	0	0.84235	0.154	0.009	0	T3	IGSF21
MDGA1	0	0.838158	0.295	0.045	0	T3	MDGA1
CHRNA1	0	0.833146	0.244	0.02	0	T3	CHRNA1
TUBB	0.00593958	0.830147	0.933	0.902	1	T3	TUBB
TAGLN3.2	8.47606e-134	0.828354	0.544	0.307	2.17538e-129	T3	TAGLN3
SLC1A2	0	0.823695	0.185	0.012	0	T3	SLC1A2
DST	4.71594e-144	0.820878	0.726	0.515	1.21035e-139	T3	DST
ANKRD33B	0	0.812744	0.23	0.023	0	T3	ANKRD33B
C3orf70	1.83547e-212	0.812562	0.205	0.037	4.71072e-208	T3	C3orf70
CCDC181	1.33412e-115	0.81124	0.439	0.232	3.42401e-111	T3	CCDC181
TLE3.1	2.84987e-134	0.810246	0.501	0.264	7.31419e-130	T3	TLE3
HNRNPH3	1.62655e-163	0.809441	0.804	0.683	4.17454e-159	T3	HNRNPH3
SNAP25	9.02376e-196	0.807119	0.325	0.096	2.31595e-191	T3	SNAP25
STK39	5.95612e-126	0.804472	0.357	0.154	1.52864e-121	T3	STK39
PTH2	7.84431e-31	0.802847	0.164	0.088	2.01324e-26	T3	PTH2
GRAMD2B	0	0.798935	0.258	0.032	0	T3	GRAMD2B
ATP1B1	8.52401e-07	0.782965	0.253	0.23	0.0218769	T3	ATP1B1
FAM161A	7.68123e-101	0.782233	0.442	0.251	1.97139e-96	T3	FAM161A
HIST1H1C	3.29459e-83	0.775762	0.437	0.256	8.45558e-79	T3	HIST1H1C
PCP2	1.93871e-170	0.770126	0.119	0.014	4.9757e-166	T3	PCP2
GADD45GIP1	1.21159e-117	0.764554	0.64	0.458	3.10956e-113	T3	GADD45GIP1
CA10	0	0.764362	0.146	0.008	0	T3	CA10
MAP7	2.36317e-239	0.75441	0.259	0.053	6.06507e-235	T3	MAP7
SPARC	1.68843e-74	0.753585	0.324	0.176	4.33336e-70	T3	SPARC
LBH	2.22177e-136	0.752067	0.28	0.096	5.70217e-132	T3	LBH
SEZ6L2.1	1.43449e-223	0.751183	0.279	0.064	3.68163e-219	T3	SEZ6L2
ZNF385A.1	2.32196e-107	0.748722	0.553	0.35	5.95931e-103	T3	ZNF385A
H3F3B	0	0.739098	0.997	0.991	0	T3	H3F3B
ATP6V0B.1	2.66205e-115	0.735741	0.64	0.432	6.83216e-111	T3	ATP6V0B
STMN1	4.78457e-268	0.729477	0.993	0.981	1.22796e-263	T3	STMN1
SLC17A7	0	0.729127	0.202	0.014	0	T3	SLC17A7
TMA16	1.13798e-68	0.724402	0.396	0.246	2.92062e-64	T3	TMA16
GSE1	2.40647e-131	0.723109	0.368	0.158	6.1762e-127	T3	GSE1
GDE1	3.13924e-116	0.720632	0.321	0.137	8.05685e-112	T3	GDE1
CAMK2B	3.6583e-277	0.715239	0.205	0.026	9.38902e-273	T3	CAMK2B
MLLT11.2	3.40274e-78	0.71111	0.528	0.348	8.73312e-74	T3	MLLT11
ITSN1	3.36947e-106	0.709928	0.298	0.127	8.64774e-102	T3	ITSN1
ZEB1	1.28803e-93	0.70584	0.465	0.272	3.30574e-89	T3	ZEB1
CD44	2.70079e-222	0.704574	0.23	0.044	6.93158e-218	T3	CD44
PEX5L	0	0.700316	0.183	0.013	0	T3	PEX5L
SQLE	6.53356e-100	-0.701304	0.214	0.468	1.67684e-95	T3	SQLE
DNAJB1.1	3.18115e-37	-0.711865	0.317	0.452	8.16442e-33	T3	DNAJB1
BTG1	2.97183e-140	-0.714065	0.829	0.964	7.6272e-136	T3	BTG1
DKK1	1.30022e-68	-0.716166	0.022	0.174	3.33701e-64	T3	DKK1
RASSF4	3.72764e-91	-0.716511	0.112	0.334	9.56699e-87	T3	RASSF4
HMGN3	1.05418e-125	-0.716624	0.459	0.696	2.70555e-121	T3	HMGN3
LHX2.1	9.98105e-114	-0.717416	0.246	0.516	2.56164e-109	T3	LHX2
SOX8.1	2.75945e-69	-0.718432	0.061	0.229	7.08213e-65	T3	SOX8
MEG3.2	7.99773e-81	-0.72698	0.446	0.65	2.05262e-76	T3	MEG3
CRB1	3.36435e-98	-0.727722	0.203	0.455	8.6346e-94	T3	CRB1
CMTM6	1.16955e-112	-0.741973	0.293	0.556	3.00164e-108	T3	CMTM6
IFITM3.1	1.35509e-108	-0.748259	0.032	0.259	3.47785e-104	T3	IFITM3
MLEC	5.73195e-115	-0.751154	0.193	0.464	1.47111e-110	T3	MLEC
DBI.1	1.53588e-129	-0.755456	0.444	0.696	3.94184e-125	T3	DBI
MUM1	3.8493e-128	-0.760226	0.438	0.704	9.87922e-124	T3	MUM1
COL4A2	1.22794e-118	-0.76671	0.045	0.292	3.15151e-114	T3	COL4A2
JUNB.2	4.70205e-43	-0.766952	0.316	0.458	1.20678e-38	T3	JUNB
FILIP1	4.41513e-100	-0.770051	0.037	0.25	1.13314e-95	T3	FILIP1
CRYM.1	4.31403e-96	-0.775176	0.023	0.221	1.10719e-91	T3	CRYM
L1TD1	2.06366e-73	-0.781191	0.033	0.198	5.29639e-69	T3	L1TD1
JUND	8.81917e-109	-0.786915	0.802	0.877	2.26344e-104	T3	JUND
RNF180.1	1.97273e-97	-0.788231	0.117	0.35	5.06301e-93	T3	RNF180
RTN4	7.75235e-236	-0.793426	0.859	0.972	1.98964e-231	T3	RTN4
GLI3	2.33858e-115	-0.798843	0.034	0.269	6.00196e-111	T3	GLI3
ST5	7.75869e-105	-0.799363	0.114	0.359	1.99127e-100	T3	ST5
PLEKHA1	1.27851e-113	-0.799541	0.296	0.561	3.28131e-109	T3	PLEKHA1
FOSB.3	3.20466e-97	-0.806654	0.12	0.359	8.22475e-93	T3	FOSB
HMGCS1	4.89336e-91	-0.808087	0.141	0.368	1.25588e-86	T3	HMGCS1
MCAM.2	9.71587e-81	-0.809838	0.098	0.297	2.49358e-76	T3	MCAM
CCDC34.2	1.22698e-114	-0.811987	0.242	0.519	3.14904e-110	T3	CCDC34
FABP5.1	1.00771e-163	-0.8141	0.326	0.66	2.58629e-159	T3	FABP5
LUM.2	8.62168e-71	-0.817073	0.027	0.184	2.21276e-66	T3	LUM
DUSP1.2	5.24934e-86	-0.82271	0.498	0.69	1.34724e-81	T3	DUSP1
LINC01833.1	7.78878e-124	-0.823497	0.321	0.594	1.99899e-119	T3	LINC01833
HEY1	1.12722e-90	-0.828615	0.068	0.277	2.89301e-86	T3	HEY1
RLBP1.1	4.75707e-91	-0.829493	0.031	0.225	1.2209e-86	T3	RLBP1
PRSS23.1	3.32823e-108	-0.838286	0.108	0.357	8.54189e-104	T3	PRSS23
FZD5.1	1.81022e-121	-0.85385	0.128	0.395	4.64594e-117	T3	FZD5
HSPA1B	2.53759e-43	-0.854188	0.445	0.574	6.51273e-39	T3	HSPA1B
VCAN	4.15528e-114	-0.857785	0.105	0.362	1.06645e-109	T3	VCAN
MOB3B.1	3.99239e-127	-0.858293	0.045	0.302	1.02465e-122	T3	MOB3B
WIF1.2	7.14835e-60	-0.858511	0.032	0.172	1.83462e-55	T3	WIF1
HMX1	1.39393e-143	-0.859099	0.386	0.665	3.57751e-139	T3	HMX1
GNAI2	5.17815e-157	-0.862119	0.362	0.651	1.32897e-152	T3	GNAI2
ETV5.1	4.08923e-131	-0.864368	0.034	0.294	1.0495e-126	T3	ETV5
TMEM37.1	3.73434e-124	-0.869705	0.037	0.288	9.58418e-120	T3	TMEM37
ASCL1.1	3.7047e-141	-0.875277	0.412	0.698	9.5081e-137	T3	ASCL1
KIAA1147	5.42724e-109	-0.887286	0.094	0.337	1.3929e-104	T3	KIAA1147
ADAMTS6.1	3.273e-134	-0.897234	0.037	0.301	8.40015e-130	T3	ADAMTS6
TAGLN2	8.94442e-148	-0.911646	0.131	0.441	2.29558e-143	T3	TAGLN2
PTPRZ1	2.03363e-154	-0.912829	0.279	0.598	5.2193e-150	T3	PTPRZ1
LIMCH1.2	3.52181e-123	-0.923391	0.139	0.412	9.03873e-119	T3	LIMCH1
MYO10.1	2.47777e-133	-0.929621	0.23	0.517	6.35919e-129	T3	MYO10
SPRY2.1	2.7582e-137	-0.951018	0.118	0.405	7.07891e-133	T3	SPRY2
FAM69C	1.84479e-159	-0.959615	0.022	0.317	4.73466e-155	T3	FAM69C
SRGAP3	9.61605e-159	-0.959728	0.233	0.557	2.46796e-154	T3	SRGAP3
CA14.1	2.33032e-141	-0.963064	0.067	0.35	5.98076e-137	T3	CA14
HSPA1A	9.98764e-64	-0.963592	0.539	0.703	2.56333e-59	T3	HSPA1A
ID4.1	1.24518e-142	-0.978982	0.253	0.547	3.19576e-138	T3	ID4
CREB5.1	2.89661e-139	-0.980434	0.06	0.337	7.43415e-135	T3	CREB5
AC009041.2.1	1.05114e-125	-1.00314	0.067	0.327	2.69776e-121	T3	AC009041.2
RARRES2.1	2.5082e-168	-1.02348	0.089	0.416	6.4373e-164	T3	RARRES2
DDHD1.1	2.80955e-146	-1.03342	0.222	0.518	7.21071e-142	T3	DDHD1
FBXW7.1	1.31608e-178	-1.03495	0.265	0.606	3.37771e-174	T3	FBXW7
KDR.2	7.68519e-152	-1.03872	0.052	0.344	1.9724e-147	T3	KDR
REST.1	3.35897e-188	-1.05051	0.049	0.391	8.62079e-184	T3	REST
MGARP.1	3.19787e-229	-1.0765	0.394	0.732	8.20734e-225	T3	MGARP
ID2	1.17731e-140	-1.07704	0.142	0.441	3.02157e-136	T3	ID2
SLC1A3.1	2.99639e-171	-1.08286	0.07	0.398	7.69024e-167	T3	SLC1A3
EGR1.3	2.37285e-103	-1.08729	0.172	0.422	6.08991e-99	T3	EGR1
C1orf61.1	1.02846e-81	-1.09019	0.132	0.327	2.63954e-77	T3	C1orf61
GAS1.2	6.51312e-123	-1.09322	0.16	0.427	1.67159e-118	T3	GAS1
LGR4.1	1.46172e-215	-1.09626	0.245	0.623	3.75151e-211	T3	LGR4
STON2.1	4.71013e-196	-1.10077	0.128	0.491	1.20885e-191	T3	STON2
TLE4.1	9.16966e-209	-1.14421	0.094	0.471	2.35339e-204	T3	TLE4
COL2A1.1	1.65014e-198	-1.14616	0.041	0.393	4.23509e-194	T3	COL2A1
GATB.2	1.74442e-177	-1.16598	0.135	0.468	4.47706e-173	T3	GATB
TRPM3.2	5.38706e-190	-1.18859	0.025	0.36	1.38259e-185	T3	TRPM3
BAMBI.3	5.39987e-183	-1.19324	0.113	0.452	1.38588e-178	T3	BAMBI
IGFBP2.1	1.56674e-182	-1.20141	0.271	0.621	4.02103e-178	T3	IGFBP2
LINC00461.2	2.30416e-196	-1.2032	0.332	0.659	5.91364e-192	T3	LINC00461
DAPL1.2	2.99251e-222	-1.21783	0.246	0.635	7.68027e-218	T3	DAPL1
NES	1.65268e-229	-1.27086	0.092	0.484	4.24159e-225	T3	NES
QDPR.3	4.05303e-173	-1.27814	0.184	0.502	1.04021e-168	T3	QDPR
GPM6B.2	2.74167e-274	-1.28206	0.403	0.757	7.0365e-270	T3	GPM6B
MYB.1	5.37545e-258	-1.30528	0.097	0.519	1.37961e-253	T3	MYB
PLP1.3	8.42835e-199	-1.34495	0.052	0.399	2.16314e-194	T3	PLP1
PRSS35.3	7.37057e-177	-1.3573	0.061	0.385	1.89166e-172	T3	PRSS35
METRN.1	2.07145e-229	-1.35865	0.145	0.532	5.31638e-225	T3	METRN
JUN.3	0	-1.41451	0.699	0.906	0	T3	JUN
SOX9.3	8.66954e-277	-1.41694	0.244	0.653	2.22504e-272	T3	SOX9
PAX6.1	0	-1.42373	0.462	0.875	0	T3	PAX6
PMEPA1.1	0	-1.46898	0.34	0.763	0	T3	PMEPA1
AL139246.5	6.13861e-186	-1.53714	0.111	0.451	1.57547e-181	T3	AL139246.5
ID1.3	1.0841e-284	-1.53824	0.237	0.654	2.78235e-280	T3	ID1
CRABP1	0	-1.58522	0.718	0.99	0	T3	CRABP1
MEST	0	-1.63371	0.305	0.792	0	T3	MEST
SOX2.2	0	-1.72686	0.52	0.914	0	T3	SOX2
HES4.3	0	-1.74069	0.266	0.731	0	T3	HES4
ID3.3	2.95013e-188	-1.7697	0.123	0.466	7.5715e-184	T3	ID3
SPP1.3	0	-1.89537	0.406	0.844	0	T3	SPP1
SAT1.3	1.34604e-207	-1.90288	0.232	0.572	3.45462e-203	T3	SAT1
DKK3.1	0	-1.97027	0.188	0.767	0	T3	DKK3
CYR61.3	0	-2.05434	0.06	0.561	0	T3	CYR61
ZFP36L2.3	0	-2.12774	0.459	0.878	0	T3	ZFP36L2
TTYH1.3	0	-2.14357	0.231	0.8	0	T3	TTYH1
CLU	0	-2.15749	0.23	0.856	0	T3	CLU
SFRP2.3	0	-2.16593	0.194	0.726	0	T3	SFRP2
TF.3	1.12206e-254	-2.19566	0.078	0.485	2.87977e-250	T3	TF
ZFP36L1.3	0	-2.19606	0.191	0.785	0	T3	ZFP36L1
FOS.3	0	-2.28645	0.474	0.822	0	T3	FOS
HES5	0	-2.36844	0.2	0.657	0	T3	HES5
CCND1.2	0	-2.66882	0.359	0.876	0	T3	CCND1
HES1.3	0	-2.82123	0.162	0.77	0	T3	HES1
VIM.3	0	-2.85922	0.638	0.984	0	T3	VIM

## Sheet: RPC_T1_T2_RGCs-HCs_ACs
	p_val	avg_log2FC	pct.1	pct.2	p_val_adj	cluster	gene
PRPH	0	4.00818	0.771	0.064	0	RGCs	PRPH
SNCG	0	3.41967	0.851	0.155	0	RGCs	SNCG
GAP43	0	3.38973	0.884	0.228	0	RGCs	GAP43
NEFL	0	2.94255	0.804	0.129	0	RGCs	NEFL
NEFM	0	2.89972	0.792	0.11	0	RGCs	NEFM
ISL1	0	2.63532	0.771	0.046	0	RGCs	ISL1
OLFM1	0	2.59497	0.788	0.096	0	RGCs	OLFM1
NRN1	0	2.56242	0.744	0.049	0	RGCs	NRN1
UCHL1	0	2.44493	0.916	0.43	0	RGCs	UCHL1
ELAVL4	0	2.40724	0.81	0.102	0	RGCs	ELAVL4
NSG1	0	2.27218	0.883	0.28	0	RGCs	NSG1
SNCA	0	2.23197	0.763	0.177	0	RGCs	SNCA
TUBA1A	0	2.20593	0.999	0.99	0	RGCs	TUBA1A
TUBB2A	0	2.14287	0.952	0.52	0	RGCs	TUBB2A
EEF1A2	0	2.07942	0.718	0.112	0	RGCs	EEF1A2
RTN1	0	1.96752	0.944	0.41	0	RGCs	RTN1
C4orf48	0	1.91524	0.903	0.437	0	RGCs	C4orf48
INA	0	1.85513	0.897	0.326	0	RGCs	INA
SYT4	0	1.85479	0.761	0.128	0	RGCs	SYT4
S100A10	0	1.85387	0.478	0.038	0	RGCs	S100A10
RBPMS	0	1.8459	0.65	0.034	0	RGCs	RBPMS
IRX2	0	1.81574	0.661	0.021	0	RGCs	IRX2
ACAT2	0	1.7979	0.745	0.21	0	RGCs	ACAT2
TMSB10	0	1.75515	0.996	0.973	0	RGCs	TMSB10
CALM2	0	1.74628	0.986	0.935	0	RGCs	CALM2
CDKN2D	0	1.7247	0.809	0.152	0	RGCs	CDKN2D
CNTN2	0	1.69565	0.451	0.019	0	RGCs	CNTN2
GNG3	0	1.68049	0.848	0.22	0	RGCs	GNG3
HMGCS1	0	1.6756	0.787	0.297	0	RGCs	HMGCS1
MAP1B	0	1.67459	0.952	0.834	0	RGCs	MAP1B
TUBB	0	1.66629	0.979	0.906	0	RGCs	TUBB
EBF1	0	1.65791	0.728	0.054	0	RGCs	EBF1
STMN2	0	1.62324	0.992	0.651	0	RGCs	STMN2
TUBB2B	0	1.60777	0.993	0.948	0	RGCs	TUBB2B
PCSK1N	0	1.59943	0.909	0.419	0	RGCs	PCSK1N
CRMP1	0	1.59555	0.911	0.494	0	RGCs	CRMP1
BASP1	0	1.47554	0.967	0.767	0	RGCs	BASP1
ANK2	0	1.47445	0.781	0.172	0	RGCs	ANK2
MLLT11	0	1.4513	0.925	0.528	0	RGCs	MLLT11
CALB2	0	1.4393	0.516	0.033	0	RGCs	CALB2
YWHAH	0	1.43143	0.886	0.506	0	RGCs	YWHAH
EBF3	0	1.40603	0.654	0.024	0	RGCs	EBF3
ENO2	0	1.39914	0.839	0.319	0	RGCs	ENO2
SCG5	0	1.38203	0.837	0.286	0	RGCs	SCG5
PPP1R1A	0	1.36713	0.78	0.173	0	RGCs	PPP1R1A
RGS10	0	1.36565	0.49	0.011	0	RGCs	RGS10
PAFAH1B3	0	1.35199	0.895	0.516	0	RGCs	PAFAH1B3
ELAVL2	0	1.33506	0.747	0.123	0	RGCs	ELAVL2
JPT1	0	1.33234	0.942	0.604	0	RGCs	JPT1
PLPPR3	0	1.32667	0.806	0.288	0	RGCs	PLPPR3
CD24	0	1.31504	0.935	0.503	0	RGCs	CD24
MAPT	0	1.3139	0.804	0.204	0	RGCs	MAPT
FKBP1B	0	1.31092	0.673	0.079	0	RGCs	FKBP1B
MGST3	0	1.28696	0.867	0.526	0	RGCs	MGST3
POU6F2	0	1.24496	0.613	0.033	0	RGCs	POU6F2
DPYSL3	0	1.22192	0.773	0.172	0	RGCs	DPYSL3
TXN	0	1.19724	0.867	0.531	0	RGCs	TXN
MSMO1	0	1.19673	0.759	0.281	0	RGCs	MSMO1
SQLE	0	1.18425	0.79	0.389	0	RGCs	SQLE
TBCB	0	1.17956	0.829	0.377	0	RGCs	TBCB
POU4F1	0	1.17723	0.487	0.013	0	RGCs	POU4F1
POU4F2	0	1.17601	0.552	0.014	0	RGCs	POU4F2
MAP1LC3B	0	1.17424	0.848	0.447	0	RGCs	MAP1LC3B
PGM2L1	0	1.15568	0.713	0.149	0	RGCs	PGM2L1
CEND1	0	1.13139	0.632	0.081	0	RGCs	CEND1
DCX	0	1.12386	0.808	0.227	0	RGCs	DCX
HMGCR	0	1.12058	0.711	0.201	0	RGCs	HMGCR
PKM	0	1.11176	0.936	0.735	0	RGCs	PKM
MAP1LC3A	0	1.11109	0.744	0.199	0	RGCs	MAP1LC3A
CHRNA3	0	1.10466	0.606	0.074	0	RGCs	CHRNA3
DYNLT1	0	1.10365	0.844	0.461	0	RGCs	DYNLT1
PPP1R14B	0	1.09242	0.845	0.472	0	RGCs	PPP1R14B
CALM3	0	1.09007	0.883	0.529	0	RGCs	CALM3
CXADR	0	1.0858	0.746	0.184	0	RGCs	CXADR
KLF7	0	1.08468	0.716	0.165	0	RGCs	KLF7
GDI1	0	1.07086	0.806	0.314	0	RGCs	GDI1
VDAC3	0	1.06878	0.813	0.356	0	RGCs	VDAC3
VAT1	0	1.06841	0.672	0.107	0	RGCs	VAT1
TMSB4X	0	1.06653	0.974	0.931	0	RGCs	TMSB4X
SERPINE2	0	1.06383	0.411	0.093	0	RGCs	SERPINE2
ISLR2	0	1.05985	0.678	0.114	0	RGCs	ISLR2
ATP1B1	0	1.05235	0.788	0.29	0	RGCs	ATP1B1
YWHAQ	0	1.0452	0.924	0.76	0	RGCs	YWHAQ
LY6H	0	1.04381	0.592	0.145	0	RGCs	LY6H
CALM1	0	1.04366	0.926	0.679	0	RGCs	CALM1
IDI1	0	1.04206	0.751	0.316	0	RGCs	IDI1
FXYD7	0	1.03415	0.493	0.036	0	RGCs	FXYD7
MIF	0	1.03232	0.889	0.667	0	RGCs	MIF
TAGLN3	0	1.03204	0.9	0.491	0	RGCs	TAGLN3
APLP1	0	1.01678	0.812	0.297	0	RGCs	APLP1
RAC3	0	1.01662	0.656	0.12	0	RGCs	RAC3
MXRA7	0	1.01188	0.706	0.21	0	RGCs	MXRA7
CCNI	0	1.00346	0.968	0.896	0	RGCs	CCNI
ATP5F1E	0	1.00265	0.946	0.808	0	RGCs	ATP5F1E
TFAP2D	0	1.00115	0.339	0.01	0	RGCs	TFAP2D
PODXL2	0	0.998603	0.82	0.311	0	RGCs	PODXL2
RAB6B	0	0.997542	0.681	0.112	0	RGCs	RAB6B
VSTM2L	0	0.99332	0.576	0.064	0	RGCs	VSTM2L
ACOT7	0	0.988938	0.639	0.082	0	RGCs	ACOT7
FDFT1	0	0.985856	0.751	0.332	0	RGCs	FDFT1
NTM	0	0.980136	0.697	0.209	0	RGCs	NTM
RBFOX3	0	0.978573	0.618	0.066	0	RGCs	RBFOX3
SLC17A6	0	0.976057	0.511	0.01	0	RGCs	SLC17A6
ELAVL3	0	0.974633	0.848	0.325	0	RGCs	ELAVL3
RAB3A	0	0.970585	0.743	0.202	0	RGCs	RAB3A
ACTB	0	0.969412	0.99	0.963	0	RGCs	ACTB
TMEM14A	0	0.968783	0.673	0.118	0	RGCs	TMEM14A
CDKN1C	0	0.965529	0.713	0.29	0	RGCs	CDKN1C
IRX1	0	0.965278	0.402	0.008	0	RGCs	IRX1
C14orf132	0	0.951228	0.719	0.229	0	RGCs	C14orf132
STMN4	0	0.946264	0.852	0.348	0	RGCs	STMN4
KLC1	0	0.945553	0.788	0.269	0	RGCs	KLC1
HSPA8	0	0.940607	0.917	0.748	0	RGCs	HSPA8
PRDX5	0	0.937144	0.875	0.564	0	RGCs	PRDX5
NAGK	0	0.937128	0.675	0.166	0	RGCs	NAGK
COMTD1	0	0.935764	0.548	0.026	0	RGCs	COMTD1
GDAP1L1	0	0.934308	0.672	0.141	0	RGCs	GDAP1L1
SVBP	0	0.92993	0.767	0.283	0	RGCs	SVBP
FDPS	0	0.929468	0.783	0.398	0	RGCs	FDPS
GNAO1	0	0.926573	0.621	0.086	0	RGCs	GNAO1
MVD	0	0.922813	0.576	0.09	0	RGCs	MVD
KIF5A	0	0.91376	0.607	0.113	0	RGCs	KIF5A
OLFM2	0	0.913401	0.631	0.094	0	RGCs	OLFM2
ALCAM	0	0.913398	0.454	0.015	0	RGCs	ALCAM
TMEM97	0	0.910576	0.622	0.198	0	RGCs	TMEM97
STMN1	0	0.907539	0.994	0.985	0	RGCs	STMN1
ATL1	0	0.903533	0.707	0.179	0	RGCs	ATL1
KLHL35	0	0.901417	0.479	0.06	0	RGCs	KLHL35
L1CAM	0	0.898109	0.67	0.117	0	RGCs	L1CAM
NKAIN3	0	0.897605	0.476	0.04	0	RGCs	NKAIN3
ARL6IP5	0	0.893062	0.787	0.332	0	RGCs	ARL6IP5
MAP4	0	0.886587	0.753	0.249	0	RGCs	MAP4
OPTN	0	0.879892	0.612	0.076	0	RGCs	OPTN
GNAS	0	0.877025	0.953	0.856	0	RGCs	GNAS
AKAP12	0	0.875011	0.654	0.165	0	RGCs	AKAP12
NKAIN1	0	0.872495	0.626	0.125	0	RGCs	NKAIN1
ATP1A3	0	0.870234	0.782	0.267	0	RGCs	ATP1A3
STMN3	0	0.866986	0.737	0.219	0	RGCs	STMN3
RUNDC3B	0	0.857662	0.562	0.052	0	RGCs	RUNDC3B
CRABP2	0	0.856623	0.484	0.077	0	RGCs	CRABP2
FAM57B	0	0.855236	0.759	0.251	0	RGCs	FAM57B
PCMT1	0	0.851718	0.783	0.327	0	RGCs	PCMT1
CRABP1	0	0.850023	0.985	0.953	0	RGCs	CRABP1
EDIL3	0	0.849168	0.594	0.098	0	RGCs	EDIL3
POU2F2	0	0.849117	0.61	0.101	0	RGCs	POU2F2
MEIS3	0	0.848601	0.646	0.155	0	RGCs	MEIS3
PBX3	0	0.847506	0.617	0.099	0	RGCs	PBX3
LINGO1	0	0.84693	0.662	0.149	0	RGCs	LINGO1
GABBR2	0	0.844583	0.527	0.052	0	RGCs	GABBR2
CCDC184	0	0.843347	0.592	0.068	0	RGCs	CCDC184
DPYSL2	0	0.839308	0.878	0.501	0	RGCs	DPYSL2
SNAP25	0	0.838866	0.737	0.218	0	RGCs	SNAP25
YWHAB	0	0.838374	0.909	0.629	0	RGCs	YWHAB
SLC18A2	0	0.83825	0.452	0.033	0	RGCs	SLC18A2
CPE	0	0.836448	0.849	0.411	0	RGCs	CPE
DSTN	0	0.836357	0.879	0.587	0	RGCs	DSTN
CDC42	0	0.836189	0.858	0.558	0	RGCs	CDC42
TTC9B	0	0.827023	0.656	0.15	0	RGCs	TTC9B
ADCY1	0	0.82648	0.55	0.078	0	RGCs	ADCY1
KIF5C	0	0.826366	0.837	0.346	0	RGCs	KIF5C
ARL8A	0	0.819155	0.699	0.19	0	RGCs	ARL8A
MSTN	0	0.813233	0.343	0.01	0	RGCs	MSTN
CNIH2	0	0.806482	0.636	0.138	0	RGCs	CNIH2
PKIA	0	0.805579	0.804	0.331	0	RGCs	PKIA
SMIM18	0	0.803647	0.519	0.037	0	RGCs	SMIM18
DYNLRB1	0	0.802837	0.849	0.504	0	RGCs	DYNLRB1
FASN	0	0.795568	0.61	0.119	0	RGCs	FASN
TRAPPC1	0	0.794595	0.779	0.331	0	RGCs	TRAPPC1
ATP6V1G2	0	0.79441	0.658	0.173	0	RGCs	ATP6V1G2
SEZ6L2	0	0.791275	0.712	0.238	0	RGCs	SEZ6L2
YWHAZ	0	0.790196	0.859	0.54	0	RGCs	YWHAZ
AP2M1	0	0.789244	0.86	0.531	0	RGCs	AP2M1
HRAS	0	0.788768	0.702	0.188	0	RGCs	HRAS
AC010931.2	0	0.786039	0.594	0.118	0	RGCs	AC010931.2
CHRNB3	0	0.784994	0.457	0.006	0	RGCs	CHRNB3
SELENOW	0	0.782476	0.832	0.452	0	RGCs	SELENOW
SPTBN1	0	0.780369	0.682	0.201	0	RGCs	SPTBN1
PHPT1	0	0.780157	0.809	0.402	0	RGCs	PHPT1
DYNC1LI1	0	0.778992	0.746	0.262	0	RGCs	DYNC1LI1
ZC2HC1A	0	0.778066	0.765	0.303	0	RGCs	ZC2HC1A
TPM1	0	0.775513	0.647	0.162	0	RGCs	TPM1
DNER	0	0.774394	0.69	0.231	0	RGCs	DNER
NHLH2	0	0.773672	0.594	0.112	0	RGCs	NHLH2
SCD	0	0.772439	0.604	0.153	0	RGCs	SCD
WRB	0	0.764098	0.74	0.295	0	RGCs	WRB
DDAH2	0	0.761568	0.799	0.467	0	RGCs	DDAH2
GRB2	0	0.76073	0.71	0.222	0	RGCs	GRB2
ANXA6	0	0.758936	0.44	0.038	0	RGCs	ANXA6
TMEM163	0	0.756003	0.358	0.011	0	RGCs	TMEM163
DCTN3	0	0.754753	0.835	0.446	0	RGCs	DCTN3
RBFOX2	0	0.754172	0.827	0.335	0	RGCs	RBFOX2
TUBB4A	0	0.753263	0.632	0.119	0	RGCs	TUBB4A
CYCS	0	0.750244	0.802	0.417	0	RGCs	CYCS
REEP1	0	0.749949	0.507	0.06	0	RGCs	REEP1
ATP6V0B	0	0.747045	0.863	0.512	0	RGCs	ATP6V0B
PTMS	0	0.746843	0.961	0.826	0	RGCs	PTMS
CRIP2	0	0.746384	0.693	0.223	0	RGCs	CRIP2
SMS	0	0.742081	0.741	0.277	0	RGCs	SMS
AP3S1	0	0.739981	0.698	0.209	0	RGCs	AP3S1
RAB3B	0	0.739033	0.506	0.072	0	RGCs	RAB3B
C16orf45	0	0.731586	0.8	0.412	0	RGCs	C16orf45
FSD1	0	0.730444	0.59	0.101	0	RGCs	FSD1
MARCKSL1	0	0.730429	0.977	0.945	0	RGCs	MARCKSL1
PRUNE2	0	0.727795	0.433	0.018	0	RGCs	PRUNE2
RBPMS2	0	0.725554	0.436	0.014	0	RGCs	RBPMS2
ANXA2	0	0.723449	0.447	0.076	0	RGCs	ANXA2
ARPP19	0	0.720367	0.791	0.364	0	RGCs	ARPP19
SH3BGRL3	0	0.719775	0.766	0.37	0	RGCs	SH3BGRL3
MAGED2	0	0.718874	0.835	0.512	0	RGCs	MAGED2
FIBP	0	0.715458	0.711	0.239	0	RGCs	FIBP
NPDC1	0	0.715038	0.707	0.202	0	RGCs	NPDC1
PGAM1	0	0.713743	0.88	0.58	0	RGCs	PGAM1
FAM241B	0	0.713617	0.617	0.132	0	RGCs	FAM241B
HCFC1R1	0	0.710985	0.577	0.103	0	RGCs	HCFC1R1
DPYSL4	0	0.710633	0.77	0.303	0	RGCs	DPYSL4
TUBA1B	0	0.710449	0.932	0.755	0	RGCs	TUBA1B
KCNQ1OT1	0	0.709166	0.744	0.324	0	RGCs	KCNQ1OT1
RAB33A	0	0.706373	0.636	0.157	0	RGCs	RAB33A
GNG2	0	0.705349	0.61	0.128	0	RGCs	GNG2
MSI2	1.82561e-90	-0.714172	0.633	0.587	4.68543e-86	RGCs	MSI2
WIF1	2.76149e-86	-0.715638	0.009	0.116	7.08737e-82	RGCs	WIF1
TOX3	2.62466e-40	-0.716468	0.386	0.399	6.73618e-36	RGCs	TOX3
HSPB1	2.6204e-10	-0.72234	0.465	0.402	6.72524e-06	RGCs	HSPB1
PLEKHA1	3.0072e-23	-0.725358	0.478	0.415	7.71798e-19	RGCs	PLEKHA1
CDK6	5.2544e-155	-0.731287	0.027	0.211	1.34854e-150	RGCs	CDK6
H1F0	2.02021e-41	-0.732914	0.578	0.516	5.18487e-37	RGCs	H1F0
MID1	2.18459e-135	-0.737915	0.084	0.268	5.60675e-131	RGCs	MID1
EPHB2	1.8829e-69	-0.744602	0.32	0.392	4.83245e-65	RGCs	EPHB2
SSX2IP	2.20676e-81	-0.746372	0.098	0.222	5.66365e-77	RGCs	SSX2IP
ST5	1.1908e-105	-0.748647	0.099	0.248	3.05619e-101	RGCs	ST5
SOX4	1.97536e-143	-0.749011	0.979	0.979	5.06976e-139	RGCs	SOX4
TCF7L2	4.16954e-167	-0.751839	0.032	0.232	1.07011e-162	RGCs	TCF7L2
DKK3	1.31254e-64	-0.754091	0.711	0.607	3.36863e-60	RGCs	DKK3
LIMCH1	2.89454e-41	-0.75555	0.2	0.263	7.42883e-37	RGCs	LIMCH1
OTX2	5.90536e-64	-0.756011	0.057	0.164	1.51561e-59	RGCs	OTX2
TBX2-AS1	3.76857e-121	-0.75843	0.127	0.295	9.67203e-117	RGCs	TBX2-AS1
N4BP2L2	3.76446e-199	-0.761969	0.713	0.708	9.6615e-195	RGCs	N4BP2L2
NFIB	1.08048e-103	-0.765224	0.086	0.238	2.77305e-99	RGCs	NFIB
ITGB8	2.05427e-158	-0.767782	0.041	0.233	5.27228e-154	RGCs	ITGB8
PDLIM4	3.94813e-151	-0.770717	0.068	0.264	1.01329e-146	RGCs	PDLIM4
DEK	2.12311e-106	-0.779854	0.664	0.61	5.44897e-102	RGCs	DEK
KIAA1147	1.43837e-111	-0.781437	0.078	0.232	3.69157e-107	RGCs	KIAA1147
FAM184B	5.67344e-145	-0.782337	0.066	0.253	1.45609e-140	RGCs	FAM184B
H2AFV	1.59817e-117	-0.788006	0.468	0.517	4.1017e-113	RGCs	H2AFV
MSI1	3.11491e-81	-0.791206	0.4	0.446	7.99443e-77	RGCs	MSI1
LMAN1	4.15357e-70	-0.791914	0.405	0.431	1.06601e-65	RGCs	LMAN1
CA14	6.69654e-140	-0.79433	0.06	0.239	1.71867e-135	RGCs	CA14
REST	1.3871e-144	-0.796092	0.072	0.257	3.55999e-140	RGCs	REST
VSX2	1.28637e-175	-0.796606	0.036	0.247	3.30146e-171	RGCs	VSX2
PNISR	0	-0.796693	0.839	0.864	0	RGCs	PNISR
PRSS23	2.52167e-119	-0.796726	0.071	0.23	6.47188e-115	RGCs	PRSS23
RPL13A	0	-0.79901	0.979	0.976	0	RGCs	RPL13A
SAT1	1.0181e-12	-0.799938	0.647	0.427	2.61296e-08	RGCs	SAT1
MAB21L1	0	-0.800796	0.861	0.89	0	RGCs	MAB21L1
RARRES2	3.57767e-157	-0.805127	0.057	0.254	9.18209e-153	RGCs	RARRES2
LGI4	1.21132e-123	-0.80517	0.085	0.253	3.10886e-119	RGCs	LGI4
MGARP	1.74432e-211	-0.806647	0.675	0.724	4.47679e-207	RGCs	MGARP
B2M	1.10808e-141	-0.809131	0.101	0.285	2.84389e-137	RGCs	B2M
SPRY2	1.66015e-108	-0.812716	0.139	0.288	4.26079e-104	RGCs	SPRY2
HMX1	6.87788e-137	-0.816643	0.553	0.606	1.76521e-132	RGCs	HMX1
CNN3	5.14627e-82	-0.817463	0.547	0.524	1.32079e-77	RGCs	CNN3
MCAM	3.63878e-135	-0.817752	0.025	0.189	9.33893e-131	RGCs	MCAM
CCDC34	5.63585e-60	-0.818814	0.282	0.354	1.44644e-55	RGCs	CCDC34
KDR	4.41254e-171	-0.820506	0.016	0.213	1.13248e-166	RGCs	KDR
COL2A1	6.40594e-169	-0.822168	0.035	0.238	1.64408e-164	RGCs	COL2A1
SMIM20	6.34952e-64	-0.830976	0.319	0.372	1.6296e-59	RGCs	SMIM20
AC009041.2	6.99709e-152	-0.834274	0.025	0.207	1.7958e-147	RGCs	AC009041.2
FZD5	1.53248e-160	-0.837248	0.057	0.253	3.93312e-156	RGCs	FZD5
SLC2A1	2.92429e-94	-0.838787	0.458	0.502	7.50519e-90	RGCs	SLC2A1
FEZF2	2.70724e-131	-0.84083	0.111	0.282	6.94813e-127	RGCs	FEZF2
HMGN2	1.07649e-270	-0.864632	0.847	0.816	2.7628e-266	RGCs	HMGN2
MALAT1	0	-0.876023	0.996	1	0	RGCs	MALAT1
QDPR	2.54656e-20	-0.882349	0.404	0.365	6.53574e-16	RGCs	QDPR
NAP1L1	0	-0.884846	0.828	0.809	0	RGCs	NAP1L1
MUM1	4.16407e-151	-0.908201	0.533	0.578	1.06871e-146	RGCs	MUM1
CREB5	3.52515e-186	-0.914665	0.04	0.256	9.04729e-182	RGCs	CREB5
HES4	4.04821e-20	-0.916046	0.645	0.508	1.03897e-15	RGCs	HES4
ID2	1.04736e-79	-0.917303	0.291	0.392	2.68805e-75	RGCs	ID2
NEUROD4	1.00419e-88	-0.936809	0.057	0.192	2.57725e-84	RGCs	NEUROD4
TFDP2	1.21152e-132	-0.93814	0.357	0.463	3.10936e-128	RGCs	TFDP2
CRB1	2.9398e-182	-0.944272	0.103	0.321	7.54501e-178	RGCs	CRB1
DDHD1	4.71604e-88	-0.945594	0.281	0.376	1.21037e-83	RGCs	DDHD1
ZEB2	1.68074e-182	-0.945874	0.527	0.604	4.31361e-178	RGCs	ZEB2
ID1	1.31498e-106	-0.952397	0.301	0.443	3.3749e-102	RGCs	ID1
FOSB	1.80853e-118	-0.959407	0.109	0.27	4.6416e-114	RGCs	FOSB
ONECUT2	1.08628e-12	-0.960257	0.321	0.209	2.78793e-08	RGCs	ONECUT2
ILDR2	4.79404e-227	-0.963673	0.049	0.305	1.23039e-222	RGCs	ILDR2
NOTCH1	9.72367e-253	-0.978827	0.03	0.306	2.49558e-248	RGCs	NOTCH1
ID4	2.77297e-88	-0.978986	0.303	0.397	7.11683e-84	RGCs	ID4
TFAP2A	4.69524e-122	-0.980847	0.12	0.314	1.20503e-117	RGCs	TFAP2A
SLC1A3	3.10136e-205	-0.98099	0.027	0.257	7.95964e-201	RGCs	SLC1A3
PNRC1	1.47575e-284	-0.991933	0.576	0.678	3.7875e-280	RGCs	PNRC1
ID3	1.64276e-09	-0.993788	0.355	0.334	4.21614e-05	RGCs	ID3
LGR4	1.52045e-167	-0.998195	0.312	0.468	3.90223e-163	RGCs	LGR4
XIST	2.03001e-153	-0.999561	0.153	0.383	5.21002e-149	RGCs	XIST
CMTM6	1.25401e-167	-1.00127	0.209	0.392	3.21841e-163	RGCs	CMTM6
TMEM123	2.04413e-214	-1.00548	0.103	0.346	5.24627e-210	RGCs	TMEM123
DNAJB1	6.78631e-13	-1.02468	0.454	0.396	1.74171e-08	RGCs	DNAJB1
LHX2	4.31389e-249	-1.0294	0.073	0.351	1.10716e-244	RGCs	LHX2
GATB	1.12727e-131	-1.03149	0.156	0.321	2.89313e-127	RGCs	GATB
HES6	8.55317e-07	-1.03918	0.581	0.458	0.0219517	RGCs	HES6
PROX1	1.38253e-94	-1.06044	0.19	0.316	3.54827e-90	RGCs	PROX1
RPL7	0	-1.07119	0.963	0.973	0	RGCs	RPL7
METRN	8.45525e-184	-1.07471	0.161	0.376	2.17004e-179	RGCs	METRN
CDC42EP4	9.37083e-214	-1.08921	0.274	0.472	2.40502e-209	RGCs	CDC42EP4
PLP1	6.09152e-229	-1.0939	0.021	0.27	1.56339e-224	RGCs	PLP1
MYB	9.42215e-254	-1.10832	0.051	0.325	2.41819e-249	RGCs	MYB
BAMBI	2.49557e-204	-1.11296	0.083	0.318	6.40488e-200	RGCs	BAMBI
FABP7	1.27987e-167	-1.11365	0.387	0.538	3.28478e-163	RGCs	FABP7
CLU	1.19418e-162	-1.1182	0.683	0.644	3.06487e-158	RGCs	CLU
SIX6	0	-1.12677	0.507	0.662	0	RGCs	SIX6
BTG2	1.24926e-69	-1.13273	0.348	0.404	3.20623e-65	RGCs	BTG2
C1orf61	5.28693e-180	-1.13274	0.037	0.252	1.35689e-175	RGCs	C1orf61
GAS1	3.12718e-189	-1.15125	0.06	0.281	8.02592e-185	RGCs	GAS1
TFAP2B	4.19295e-158	-1.15425	0.078	0.289	1.07612e-153	RGCs	TFAP2B
PRSS35	1.71265e-215	-1.15505	0.014	0.249	4.39551e-211	RGCs	PRSS35
JUNB	2.41807e-77	-1.1741	0.319	0.394	6.20597e-73	RGCs	JUNB
NES	3.8655e-274	-1.18738	0.073	0.361	9.92081e-270	RGCs	NES
PTPRZ1	5.57078e-292	-1.18952	0.136	0.448	1.42974e-287	RGCs	PTPRZ1
CKB	0	-1.19339	0.984	0.979	0	RGCs	CKB
FBXW7	7.09612e-260	-1.20119	0.277	0.514	1.82122e-255	RGCs	FBXW7
MYO10	1.56728e-284	-1.20464	0.051	0.35	4.02241e-280	RGCs	MYO10
FXYD1	1.79602e-239	-1.20496	0.102	0.368	4.6095e-235	RGCs	FXYD1
MDK	1.85891e-218	-1.23078	0.593	0.652	4.7709e-214	RGCs	MDK
DUSP1	3.69304e-133	-1.2556	0.62	0.607	9.47818e-129	RGCs	DUSP1
HSPA1A	3.98284e-14	-1.27107	0.791	0.658	1.0222e-09	RGCs	HSPA1A
RPS20	0	-1.27524	0.778	0.832	0	RGCs	RPS20
PTF1A	1.63484e-94	-1.28291	0.035	0.163	4.19582e-90	RGCs	PTF1A
TCF4	8.06942e-252	-1.29151	0.433	0.603	2.07102e-247	RGCs	TCF4
RAX	2.02313e-200	-1.30725	0.301	0.483	5.19236e-196	RGCs	RAX
HSPA1B	2.90211e-43	-1.32441	0.59	0.527	7.44826e-39	RGCs	HSPA1B
SELENOP	2.02772e-307	-1.32976	0.073	0.388	5.20415e-303	RGCs	SELENOP
MEST	4.09872e-209	-1.3411	0.513	0.581	1.05194e-204	RGCs	MEST
DAPL1	6.61271e-216	-1.35038	0.285	0.485	1.69715e-211	RGCs	DAPL1
EGR1	2.87751e-127	-1.36815	0.148	0.31	7.38512e-123	RGCs	EGR1
GPM6B	5.8401e-259	-1.40746	0.395	0.558	1.49886e-254	RGCs	GPM6B
PMEPA1	9.9679e-261	-1.41768	0.387	0.561	2.55826e-256	RGCs	PMEPA1
AL139246.5	6.56845e-224	-1.48538	0.044	0.292	1.68579e-219	RGCs	AL139246.5
RORB	0	-1.4882	0.853	0.949	0	RGCs	RORB
LINC00461	0	-1.54083	0.166	0.526	0	RGCs	LINC00461
SOX9	0	-1.56663	0.109	0.471	0	RGCs	SOX9
JUN	0	-1.56824	0.701	0.793	0	RGCs	JUN
BTG1	0	-1.57246	0.854	0.938	0	RGCs	BTG1
CYR61	7.79087e-287	-1.76574	0.068	0.36	1.99953e-282	RGCs	CYR61
VIM	1.36333e-260	-1.82403	0.877	0.823	3.49899e-256	RGCs	VIM
ASCL1	0	-1.87131	0.073	0.467	0	RGCs	ASCL1
TF	2.55411e-274	-1.87673	0.041	0.33	6.55511e-270	RGCs	TF
RGS16	0	-1.89165	0.232	0.558	0	RGCs	RGS16
SFRP2	0	-1.96634	0.162	0.471	0	RGCs	SFRP2
TTYH1	0	-2.00757	0.144	0.544	0	RGCs	TTYH1
ZFP36L1	0	-2.10127	0.096	0.518	0	RGCs	ZFP36L1
SPP1	0	-2.19346	0.321	0.606	0	RGCs	SPP1
FOS	5.29746e-303	-2.27265	0.637	0.699	1.35959e-298	RGCs	FOS
ZFP36L2	0	-2.54987	0.181	0.595	0	RGCs	ZFP36L2
SOX2	0	-2.60162	0.089	0.622	0	RGCs	SOX2
HES5	1.82717e-261	-2.66941	0.192	0.438	4.68943e-257	RGCs	HES5
HES1	0	-2.80504	0.127	0.522	0	RGCs	HES1
CCND1	0	-2.86137	0.161	0.606	0	RGCs	CCND1
HES1.1	0	3.29479	0.873	0.164	0	RPCs	HES1
CCND1.1	0	3.00719	0.952	0.239	0	RPCs	CCND1
ZFP36L2.1	0	2.98917	0.952	0.227	0	RPCs	ZFP36L2
VIM.1	0	2.80001	0.999	0.706	0	RPCs	VIM
SPP1.1	0	2.59144	0.939	0.288	0	RPCs	SPP1
ZFP36L1.1	0	2.56975	0.878	0.146	0	RPCs	ZFP36L1
SOX2.1	0	2.55392	0.953	0.245	0	RPCs	SOX2
SFRP2.1	0	2.54691	0.803	0.148	0	RPCs	SFRP2
FOS.1	0	2.54112	0.875	0.553	0	RPCs	FOS
TTYH1.1	0	2.48577	0.905	0.177	0	RPCs	TTYH1
TF.1	0	2.47379	0.585	0.069	0	RPCs	TF
CYR61.1	0	2.41183	0.656	0.068	0	RPCs	CYR61
HES5.1	0	2.18647	0.685	0.194	0	RPCs	HES5
SAT1.1	0	2.05323	0.642	0.321	0	RPCs	SAT1
ID3.1	0	1.97089	0.532	0.192	0	RPCs	ID3
ID1.1	0	1.86299	0.713	0.207	0	RPCs	ID1
HES4.1	0	1.8059	0.795	0.328	0	RPCs	HES4
SOX9.1	0	1.76922	0.737	0.184	0	RPCs	SOX9
GPM6B.1	0	1.74148	0.817	0.325	0	RPCs	GPM6B
ASCL1.1	0	1.72193	0.717	0.184	0	RPCs	ASCL1
EGR1.1	0	1.71557	0.48	0.143	0	RPCs	EGR1
PRSS35.1	0	1.70219	0.464	0.032	0	RPCs	PRSS35
PMEPA1.1	0	1.68869	0.802	0.339	0	RPCs	PMEPA1
JUN.1	0	1.63905	0.935	0.665	0	RPCs	JUN
PLP1.1	0	1.626	0.5	0.038	0	RPCs	PLP1
SELENOP.1	0	1.61397	0.641	0.123	0	RPCs	SELENOP
CLU.1	0	1.57968	0.896	0.466	0	RPCs	CLU
QDPR.1	0	1.55727	0.578	0.216	0	RPCs	QDPR
RAX.1	0	1.51451	0.738	0.249	0	RPCs	RAX
FXYD1.1	0	1.49763	0.606	0.125	0	RPCs	FXYD1
GAS1.1	0	1.49403	0.466	0.089	0	RPCs	GAS1
MYB.1	0	1.44358	0.556	0.086	0	RPCs	MYB
GATB.1	0	1.39677	0.525	0.129	0	RPCs	GATB
BAMBI.1	0	1.38484	0.509	0.118	0	RPCs	BAMBI
LIMCH1.1	0	1.3825	0.476	0.089	0	RPCs	LIMCH1
MEST.1	0	1.37355	0.806	0.398	0	RPCs	MEST
MYO10.1	0	1.36296	0.55	0.128	0	RPCs	MYO10
CKB.1	0	1.35618	0.999	0.965	0	RPCs	CKB
COL2A1.1	0	1.32709	0.443	0.036	0	RPCs	COL2A1
DAPL1.1	0	1.30689	0.685	0.287	0	RPCs	DAPL1
JUNB.1	0	1.30255	0.505	0.293	0	RPCs	JUNB
SLC1A3.1	0	1.28923	0.438	0.065	0	RPCs	SLC1A3
METRN.1	0	1.28153	0.547	0.197	0	RPCs	METRN
DUSP1.1	0	1.27344	0.729	0.52	0	RPCs	DUSP1
FOSB.1	0	1.2515	0.429	0.112	0	RPCs	FOSB
IER2	0	1.24473	0.717	0.44	0	RPCs	IER2
STON2	0	1.23478	0.542	0.18	0	RPCs	STON2
KDR.1	0	1.22993	0.39	0.033	0	RPCs	KDR
AL139246.5.1	0	1.2207	0.47	0.1	0	RPCs	AL139246.5
BTG2.1	0	1.21939	0.528	0.298	0	RPCs	BTG2
MCAM.1	0	1.21518	0.341	0.035	0	RPCs	MCAM
DDHD1.1	0	1.20372	0.541	0.23	0	RPCs	DDHD1
CMTM6.1	0	1.20293	0.579	0.207	0	RPCs	CMTM6
LINC01833	0	1.1834	0.604	0.263	0	RPCs	LINC01833
CNN3.1	0	1.18223	0.724	0.38	0	RPCs	CNN3
AC009041.2.1	0	1.17635	0.362	0.047	0	RPCs	AC009041.2
LINC00461.1	0	1.16971	0.693	0.313	0	RPCs	LINC00461
FZD5.1	0	1.16782	0.432	0.072	0	RPCs	FZD5
CA14.1	0	1.1482	0.407	0.07	0	RPCs	CA14
WIF1.1	0	1.12701	0.212	0.018	0	RPCs	WIF1
GNAI2	0	1.10941	0.654	0.343	0	RPCs	GNAI2
ID4.1	0	1.10182	0.597	0.226	0	RPCs	ID4
PRSS23.1	0	1.08717	0.378	0.081	0	RPCs	PRSS23
ADAMTS6	0	1.08317	0.353	0.041	0	RPCs	ADAMTS6
FAM69C	0	1.08008	0.36	0.032	0	RPCs	FAM69C
LGI4.1	0	1.07554	0.413	0.092	0	RPCs	LGI4
REST.1	0	1.06971	0.425	0.086	0	RPCs	REST
LHX2.1	0	1.06545	0.523	0.156	0	RPCs	LHX2
NOTCH1.1	0	1.0653	0.468	0.118	0	RPCs	NOTCH1
TRPM3	0	1.06074	0.411	0.123	0	RPCs	TRPM3
ILDR2.1	0	1.05038	0.467	0.122	0	RPCs	ILDR2
TMEM37	0	1.04803	0.331	0.028	0	RPCs	TMEM37
SPRY2.1	0	1.04639	0.445	0.135	0	RPCs	SPRY2
JUND	0	1.04602	0.879	0.753	0	RPCs	JUND
RLBP1	0	1.04479	0.278	0.019	0	RPCs	RLBP1
B2M.1	0	1.03711	0.457	0.112	0	RPCs	B2M
TBX2-AS1.1	0	1.03663	0.466	0.127	0	RPCs	TBX2-AS1
DKK3.1	0	1.03472	0.812	0.479	0	RPCs	DKK3
RARRES2.1	0	1.02686	0.412	0.088	0	RPCs	RARRES2
SMIM20.1	0	1.02518	0.54	0.234	0	RPCs	SMIM20
ETV5	0	1.02385	0.335	0.044	0	RPCs	ETV5
C1orf61.1	0	1.01449	0.359	0.12	0	RPCs	C1orf61
NES.1	0	1.00998	0.502	0.186	0	RPCs	NES
CCDC34.1	0	0.99384	0.508	0.221	0	RPCs	CCDC34
LGR4.1	0	0.987213	0.625	0.313	0	RPCs	LGR4
MDK.1	0	0.979603	0.763	0.555	0	RPCs	MDK
LUM	0	0.979573	0.222	0.02	0	RPCs	LUM
MOB3B	0	0.979439	0.333	0.041	0	RPCs	MOB3B
FABP7.1	0	0.978404	0.709	0.373	0	RPCs	FABP7
CRB1.1	0	0.971327	0.472	0.155	0	RPCs	CRB1
SLC2A1.1	0	0.951412	0.663	0.371	0	RPCs	SLC2A1
MUM1.1	0	0.943597	0.718	0.463	0	RPCs	MUM1
PYGL	0	0.939746	0.3	0.031	0	RPCs	PYGL
BTG1.1	0	0.935291	0.969	0.894	0	RPCs	BTG1
CRYM	0	0.923586	0.275	0.027	0	RPCs	CRYM
SOX8	0	0.922775	0.258	0.028	0	RPCs	SOX8
RNF180	0	0.920963	0.367	0.108	0	RPCs	RNF180
TMEM123.1	0	0.916316	0.503	0.17	0	RPCs	TMEM123
IFITM3	0	0.908924	0.303	0.025	0	RPCs	IFITM3
DEK.1	0	0.908397	0.736	0.53	0	RPCs	DEK
TOX3.1	0	0.907555	0.537	0.293	0	RPCs	TOX3
GLI3	0	0.903779	0.292	0.03	0	RPCs	GLI3
NR4A1	0	0.899949	0.235	0.043	0	RPCs	NR4A1
TCF7L2.1	0	0.898775	0.364	0.086	0	RPCs	TCF7L2
CRNDE	0	0.890306	0.411	0.169	0	RPCs	CRNDE
NR2E1	0	0.889669	0.292	0.027	0	RPCs	NR2E1
VSX2.1	0	0.888254	0.397	0.083	0	RPCs	VSX2
CREB5.1	0	0.888172	0.385	0.107	0	RPCs	CREB5
TGIF1	0	0.883128	0.358	0.091	0	RPCs	TGIF1
EEF1D	0	0.865422	0.833	0.658	0	RPCs	EEF1D
PTPRZ1.1	0	0.86422	0.581	0.273	0	RPCs	PTPRZ1
CLGN	0	0.863739	0.379	0.142	0	RPCs	CLGN
DKK1	0	0.859669	0.208	0.024	0	RPCs	DKK1
TCF4.1	0	0.856667	0.753	0.45	0	RPCs	TCF4
ST5.1	0	0.856347	0.365	0.125	0	RPCs	ST5
ARHGEF26	0	0.85201	0.358	0.097	0	RPCs	ARHGEF26
FAM184B.1	0	0.847372	0.372	0.118	0	RPCs	FAM184B
FILIP1	0	0.846208	0.272	0.039	0	RPCs	FILIP1
PLEKHB1	0	0.840876	0.293	0.038	0	RPCs	PLEKHB1
COL4A2	0	0.839836	0.315	0.073	0	RPCs	COL4A2
PLEKHA1.1	0	0.837875	0.548	0.331	0	RPCs	PLEKHA1
OSTC	0	0.828788	0.595	0.365	0	RPCs	OSTC
SIX6.1	0	0.82665	0.77	0.543	0	RPCs	SIX6
DNAJB1.1	5.17753e-67	0.825059	0.434	0.382	1.32881e-62	RPCs	DNAJB1
BCHE	0	0.824402	0.371	0.111	0	RPCs	BCHE
KIAA1147.1	0	0.814794	0.342	0.112	0	RPCs	KIAA1147
TAGLN2	0	0.812625	0.435	0.178	0	RPCs	TAGLN2
CDH2	0	0.809151	0.721	0.477	0	RPCs	CDH2
TFDP2.1	0	0.806742	0.59	0.341	0	RPCs	TFDP2
RDH10	0	0.801149	0.249	0.041	0	RPCs	RDH10
CADM1	0	0.79932	0.668	0.432	0	RPCs	CADM1
LMAN1.1	0	0.792384	0.56	0.329	0	RPCs	LMAN1
CDC42EP4.1	0	0.790249	0.572	0.349	0	RPCs	CDC42EP4
RPS6	0	0.788509	0.998	0.979	0	RPCs	RPS6
SNRPG	0	0.788363	0.847	0.688	0	RPCs	SNRPG
RTN4	0	0.787901	0.98	0.865	0	RPCs	RTN4
SORCS1	0	0.786339	0.3	0.07	0	RPCs	SORCS1
NFIB.1	0	0.78412	0.34	0.125	0	RPCs	NFIB
CDK6.1	0	0.78206	0.332	0.076	0	RPCs	CDK6
CTGF	0	0.779479	0.177	0.031	0	RPCs	CTGF
SPON1	0	0.777836	0.273	0.051	0	RPCs	SPON1
ITGB8.1	0	0.770013	0.346	0.102	0	RPCs	ITGB8
CALD1	0	0.769987	0.524	0.299	0	RPCs	CALD1
CLIC1	0	0.766564	0.437	0.209	0	RPCs	CLIC1
TIMP1	0	0.764149	0.32	0.078	0	RPCs	TIMP1
CDCA7L	0	0.764098	0.323	0.084	0	RPCs	CDCA7L
FEZF2.1	0	0.761926	0.393	0.157	0	RPCs	FEZF2
FOXP2	0	0.759958	0.248	0.039	0	RPCs	FOXP2
HSPA1B.1	2.30578e-56	0.758359	0.554	0.522	5.91779e-52	RPCs	HSPA1B
TPPP3	3.1245e-289	0.753131	0.367	0.191	8.01904e-285	RPCs	TPPP3
EML1	0	0.750518	0.375	0.168	0	RPCs	EML1
HSPA1A.1	2.79496e-49	0.750217	0.696	0.662	7.17326e-45	RPCs	HSPA1A
EPHX2	0	0.749045	0.278	0.068	0	RPCs	EPHX2
RCN1	0	0.73847	0.612	0.393	0	RPCs	RCN1
ANGPTL1	0	0.736876	0.22	0.021	0	RPCs	ANGPTL1
FBXW7.1	0	0.717259	0.635	0.366	0	RPCs	FBXW7
FAM111A	0	0.71512	0.231	0.023	0	RPCs	FAM111A
DIO3	0	0.708755	0.191	0.01	0	RPCs	DIO3
BTG3	0	0.707651	0.423	0.217	0	RPCs	BTG3
ISYNA1	3.92475e-269	0.705368	0.447	0.286	1.00729e-264	RPCs	ISYNA1
TMEM98	0	0.70367	0.566	0.376	0	RPCs	TMEM98
ASPH	1.40927e-233	0.70312	0.395	0.241	3.6169e-229	RPCs	ASPH
AIF1L	0	0.702359	0.238	0.032	0	RPCs	AIF1L
CCDC112	0	-0.700131	0.164	0.443	0	RPCs	CCDC112
NOVA2	0	-0.700455	0.049	0.312	0	RPCs	NOVA2
APBB2	0	-0.701476	0.059	0.302	0	RPCs	APBB2
GNAO1.1	0	-0.701737	0.022	0.265	0	RPCs	GNAO1
CEND1.1	0	-0.703198	0.023	0.26	0	RPCs	CEND1
YWHAQ.1	0	-0.70459	0.712	0.837	0	RPCs	YWHAQ
FNBP1L	0	-0.707785	0.265	0.544	0	RPCs	FNBP1L
VASH2	0	-0.708537	0.062	0.316	0	RPCs	VASH2
HK1	0	-0.709493	0.083	0.359	0	RPCs	HK1
TBCB.1	0	-0.709523	0.315	0.534	0	RPCs	TBCB
SLC16A3	0	-0.712939	0.064	0.291	0	RPCs	SLC16A3
TAC1	0	-0.714548	0.014	0.168	0	RPCs	TAC1
MTSS1	0	-0.722584	0.065	0.323	0	RPCs	MTSS1
ACAT2.1	3.64749e-164	-0.723366	0.206	0.345	9.36129e-160	RPCs	ACAT2
CCDC88A	0	-0.723835	0.526	0.757	0	RPCs	CCDC88A
DYNC1I2	0	-0.725233	0.407	0.66	0	RPCs	DYNC1I2
COX7A2	0	-0.725364	0.681	0.848	0	RPCs	COX7A2
APC	0	-0.725455	0.132	0.389	0	RPCs	APC
RTN3	0	-0.730519	0.531	0.733	0	RPCs	RTN3
S100A10.1	2.30244e-190	-0.731146	0.036	0.147	5.90921e-186	RPCs	S100A10
RUFY3	0	-0.734196	0.202	0.499	0	RPCs	RUFY3
GNG2.1	0	-0.736697	0.042	0.31	0	RPCs	GNG2
FAM162A	6.72537e-223	-0.737338	0.256	0.445	1.72607e-218	RPCs	FAM162A
OTX2.1	1.49659e-31	-0.737833	0.123	0.168	3.84099e-27	RPCs	OTX2
SPATS2L	2.53705e-300	-0.738511	0.044	0.203	6.51134e-296	RPCs	SPATS2L
NKAIN1.1	0	-0.740971	0.044	0.307	0	RPCs	NKAIN1
FNDC5	0	-0.742178	0.038	0.298	0	RPCs	FNDC5
ATP6V1G2.1	0	-0.744422	0.083	0.36	0	RPCs	ATP6V1G2
YWHAG	0	-0.746739	0.203	0.486	0	RPCs	YWHAG
COX6A1	0	-0.749851	0.583	0.783	0	RPCs	COX6A1
VAMP2	0	-0.753778	0.584	0.775	0	RPCs	VAMP2
GPI	0	-0.755527	0.221	0.503	0	RPCs	GPI
FAM131C	1.46603e-271	-0.756933	0.042	0.193	3.76257e-267	RPCs	FAM131C
MAP6	0	-0.757154	0.209	0.488	0	RPCs	MAP6
PGM2L1.1	0	-0.75809	0.082	0.338	0	RPCs	PGM2L1
CADM2	0	-0.758592	0.235	0.48	0	RPCs	CADM2
KLC1.1	0	-0.765626	0.182	0.462	0	RPCs	KLC1
STXBP1	0	-0.766891	0.084	0.379	0	RPCs	STXBP1
EDIL3.1	0	-0.772604	0.026	0.273	0	RPCs	EDIL3
SCRT2	0	-0.77318	0.014	0.264	0	RPCs	SCRT2
CD200	0	-0.77915	0.059	0.353	0	RPCs	CD200
NPDC1.1	0	-0.782655	0.102	0.399	0	RPCs	NPDC1
KIF1A	0	-0.788675	0.141	0.447	0	RPCs	KIF1A
NRXN2	0	-0.790698	0.055	0.308	0	RPCs	NRXN2
SLC25A6	0	-0.791357	0.766	0.892	0	RPCs	SLC25A6
NNAT	0	-0.791491	0.726	0.906	0	RPCs	NNAT
ARHGEF12	0	-0.793	0.121	0.382	0	RPCs	ARHGEF12
CELF5	0	-0.797094	0.025	0.284	0	RPCs	CELF5
ADD2	0	-0.801565	0.039	0.334	0	RPCs	ADD2
ARL4C	0	-0.802432	0.217	0.462	0	RPCs	ARL4C
CSRNP3	0	-0.805246	0.158	0.43	0	RPCs	CSRNP3
DUSP26	0	-0.805449	0.095	0.391	0	RPCs	DUSP26
DYNC1H1	0	-0.811066	0.317	0.596	0	RPCs	DYNC1H1
CACNG3	0	-0.815387	0.008	0.169	0	RPCs	CACNG3
LY6H.1	0	-0.822843	0.081	0.302	0	RPCs	LY6H
GADD45G	9.84689e-239	-0.82328	0.196	0.393	2.52721e-234	RPCs	GADD45G
PRKCB	0	-0.824488	0.015	0.237	0	RPCs	PRKCB
PLXNA2	0	-0.825386	0.014	0.219	0	RPCs	PLXNA2
INSM1	0	-0.826573	0.087	0.323	0	RPCs	INSM1
CFL1	0	-0.827352	0.861	0.94	0	RPCs	CFL1
ATP1B1.1	0	-0.830511	0.21	0.471	0	RPCs	ATP1B1
SV2A	0	-0.833303	0.053	0.325	0	RPCs	SV2A
EBF1.1	0	-0.834214	0.018	0.246	0	RPCs	EBF1
DTD1	0	-0.834918	0.225	0.539	0	RPCs	DTD1
CAMK2N1	0	-0.836278	0.362	0.599	0	RPCs	CAMK2N1
NRP1	0	-0.84113	0.041	0.281	0	RPCs	NRP1
PKM.1	0	-0.841832	0.689	0.818	0	RPCs	PKM
ATCAY	0	-0.842646	0.03	0.332	0	RPCs	ATCAY
PAX6	0	-0.845222	0.875	0.93	0	RPCs	PAX6
NRXN3	0	-0.845438	0.041	0.269	0	RPCs	NRXN3
NEUROD1	1.74685e-215	-0.850289	0.132	0.297	4.48329e-211	RPCs	NEUROD1
CHGB	0	-0.850843	0.03	0.322	0	RPCs	CHGB
IGLON5	0	-0.852914	0.069	0.385	0	RPCs	IGLON5
MYT1L	0	-0.857821	0.015	0.263	0	RPCs	MYT1L
ANK2.1	0	-0.857972	0.12	0.36	0	RPCs	ANK2
DNM1	0	-0.85983	0.046	0.312	0	RPCs	DNM1
CCNG2	0	-0.860118	0.16	0.437	0	RPCs	CCNG2
MAP2	0	-0.864416	0.313	0.629	0	RPCs	MAP2
CELF3	0	-0.876481	0.027	0.349	0	RPCs	CELF3
GADD45A	4.99008e-229	-0.881989	0.162	0.337	1.2807e-224	RPCs	GADD45A
ELAVL2.1	0	-0.882996	0.052	0.328	0	RPCs	ELAVL2
SRRM4	0	-0.889052	0.096	0.383	0	RPCs	SRRM4
CALM2.1	0	-0.89367	0.93	0.952	0	RPCs	CALM2
SYT1	0	-0.898072	0.618	0.79	0	RPCs	SYT1
AP1S2	0	-0.903979	0.226	0.501	0	RPCs	AP1S2
ZNF503	0	-0.905646	0.038	0.253	0	RPCs	ZNF503
GDAP1L1.1	0	-0.911751	0.035	0.35	0	RPCs	GDAP1L1
L1CAM.1	0	-0.913134	0.019	0.326	0	RPCs	L1CAM
NHLH2.1	0	-0.915497	0.014	0.303	0	RPCs	NHLH2
SH3BP5	0	-0.915564	0.033	0.328	0	RPCs	SH3BP5
SOX11	0	-0.917933	0.591	0.732	0	RPCs	SOX11
DPYSL2.1	0	-0.923646	0.407	0.663	0	RPCs	DPYSL2
GDI1.1	0	-0.926231	0.193	0.524	0	RPCs	GDI1
PAFAH1B3.1	0	-0.928899	0.437	0.668	0	RPCs	PAFAH1B3
FEZ1	0	-0.929213	0.163	0.472	0	RPCs	FEZ1
JPH4	0	-0.930262	0.011	0.293	0	RPCs	JPH4
KIDINS220	0	-0.930324	0.267	0.585	0	RPCs	KIDINS220
GAD2	1.43228e-306	-0.931078	0.054	0.218	3.67594e-302	RPCs	GAD2
PGK1	0	-0.936458	0.576	0.773	0	RPCs	PGK1
LINGO1.1	0	-0.940433	0.042	0.354	0	RPCs	LINGO1
POU2F2.1	0	-0.943108	0.016	0.289	0	RPCs	POU2F2
BARHL2	0	-0.949892	0.014	0.286	0	RPCs	BARHL2
LHX9	1.44305e-69	-0.95393	0.165	0.235	3.70358e-65	RPCs	LHX9
SBK1	0	-0.954797	0.097	0.446	0	RPCs	SBK1
MAP1LC3A.1	0	-0.957988	0.091	0.413	0	RPCs	MAP1LC3A
ZFHX4	0	-0.959755	0.119	0.361	0	RPCs	ZFHX4
AL391650.1	0	-0.963101	0.263	0.614	0	RPCs	AL391650.1
SLC38A1	0	-0.966122	0.072	0.409	0	RPCs	SLC38A1
TFAP2C	0	-0.966647	0.015	0.18	0	RPCs	TFAP2C
SYP	0	-0.968741	0.086	0.433	0	RPCs	SYP
PLPPR3.1	0	-0.978607	0.192	0.486	0	RPCs	PLPPR3
STMN1.1	0	-0.981323	0.979	0.991	0	RPCs	STMN1
DPYSL4.1	0	-0.983607	0.164	0.52	0	RPCs	DPYSL4
TTC9B.1	0	-0.984502	0.032	0.361	0	RPCs	TTC9B
TERF2IP	0	-0.987455	0.528	0.819	0	RPCs	TERF2IP
MIF.1	0	-0.988073	0.607	0.766	0	RPCs	MIF
LINC00599	0	-0.989413	0.064	0.374	0	RPCs	LINC00599
CADPS	0	-1.00423	0.057	0.375	0	RPCs	CADPS
PKIA.1	0	-1.00796	0.209	0.538	0	RPCs	PKIA
SCN2A	0	-1.00999	0.012	0.295	0	RPCs	SCN2A
BNIP3	0	-1.01476	0.512	0.739	0	RPCs	BNIP3
TUBB.1	0	-1.01817	0.88	0.944	0	RPCs	TUBB
ZNF385D	0	-1.01821	0.318	0.56	0	RPCs	ZNF385D
PCBP3	0	-1.02194	0.052	0.397	0	RPCs	PCBP3
CDKN2D.1	0	-1.02642	0.081	0.367	0	RPCs	CDKN2D
C1QL1	0	-1.0271	0.029	0.23	0	RPCs	C1QL1
PRDM13	0	-1.02819	0.011	0.209	0	RPCs	PRDM13
NTM.1	0	-1.03692	0.128	0.389	0	RPCs	NTM
PPP1R14B.1	0	-1.05039	0.359	0.648	0	RPCs	PPP1R14B
TTC3	0	-1.0577	0.593	0.845	0	RPCs	TTC3
ATP6V0B.1	0	-1.05844	0.369	0.704	0	RPCs	ATP6V0B
CPE.1	0	-1.07983	0.266	0.626	0	RPCs	CPE
CCNI.1	0	-1.08909	0.855	0.944	0	RPCs	CCNI
CEP170	0	-1.09011	0.241	0.616	0	RPCs	CEP170
BZW2	0	-1.09269	0.187	0.577	0	RPCs	BZW2
EVL	0	-1.09303	0.251	0.621	0	RPCs	EVL
PTMS.1	0	-1.09439	0.747	0.919	0	RPCs	PTMS
SNAP25.1	0	-1.0962	0.08	0.447	0	RPCs	SNAP25
RALYL	0	-1.1091	0.061	0.29	0	RPCs	RALYL
DPYSL3.1	0	-1.11783	0.045	0.413	0	RPCs	DPYSL3
PCBP4	0	-1.12025	0.225	0.555	0	RPCs	PCBP4
MARCKSL1.1	0	-1.12287	0.916	0.974	0	RPCs	MARCKSL1
ANK3	0	-1.12858	0.111	0.447	0	RPCs	ANK3
CXXC5	0	-1.12989	0.465	0.736	0	RPCs	CXXC5
GRIA2	0	-1.13514	0.015	0.371	0	RPCs	GRIA2
CNTNAP2	0	-1.13613	0.026	0.211	0	RPCs	CNTNAP2
GPC2	0	-1.14003	0.092	0.514	0	RPCs	GPC2
PCDH9	0	-1.14548	0.165	0.416	0	RPCs	PCDH9
NRN1.1	0	-1.16837	0.047	0.221	0	RPCs	NRN1
SYT4.1	0	-1.17545	0.062	0.332	0	RPCs	SYT4
SNCA.1	0	-1.18524	0.15	0.341	0	RPCs	SNCA
RAB3A.1	0	-1.18636	0.055	0.444	0	RPCs	RAB3A
AL512380.1	0	-1.2144	0.02	0.22	0	RPCs	AL512380.1
EEF1A2.1	0	-1.2279	0.054	0.304	0	RPCs	EEF1A2
PODXL2.1	0	-1.27197	0.142	0.561	0	RPCs	PODXL2
FAM57B.1	0	-1.28214	0.076	0.506	0	RPCs	FAM57B
OLFM1.1	0	-1.29355	0.072	0.283	0	RPCs	OLFM1
PPP1R1A.1	0	-1.295	0.043	0.418	0	RPCs	PPP1R1A
ONECUT1	0	-1.31114	0.01	0.267	0	RPCs	ONECUT1
MIR124-2HG	0	-1.31241	0.08	0.481	0	RPCs	MIR124-2HG
NEUROD4.1	0	-1.3186	0.073	0.248	0	RPCs	NEUROD4
ISL1.1	0	-1.33425	0.03	0.235	0	RPCs	ISL1
MIR181A1HG	0	-1.33486	0.095	0.41	0	RPCs	MIR181A1HG
SCG3	0	-1.33569	0.13	0.615	0	RPCs	SCG3
ZFHX3	0	-1.34726	0.092	0.412	0	RPCs	ZFHX3
ENO2.1	0	-1.36171	0.16	0.565	0	RPCs	ENO2
RBFOX2.1	0	-1.36317	0.156	0.588	0	RPCs	RBFOX2
NRXN1	0	-1.3674	0.057	0.432	0	RPCs	NRXN1
RND3	0	-1.39656	0.192	0.459	0	RPCs	RND3
ATP1A3.1	0	-1.41065	0.064	0.544	0	RPCs	ATP1A3
ATOH7	3.15543e-194	-1.4423	0.033	0.143	8.09842e-190	RPCs	ATOH7
KIF5C.1	0	-1.44596	0.183	0.588	0	RPCs	KIF5C
DCX.1	0	-1.4481	0.065	0.49	0	RPCs	DCX
PCP4	1.6691e-228	-1.45695	0.074	0.219	4.28376e-224	RPCs	PCP4
ELAVL4.1	0	-1.45783	0.04	0.322	0	RPCs	ELAVL4
TUBA1A.1	0	-1.45862	0.986	0.995	0	RPCs	TUBA1A
MAPT.1	0	-1.46135	0.042	0.471	0	RPCs	MAPT
SEZ6L2.1	0	-1.47584	0.036	0.505	0	RPCs	SEZ6L2
NEFL.1	4.22271e-307	-1.4812	0.116	0.303	1.08376e-302	RPCs	NEFL
NSG2	0	-1.48563	0.043	0.445	0	RPCs	NSG2
NEFM.1	0	-1.49305	0.088	0.294	0	RPCs	NEFM
APLP1.1	0	-1.52917	0.095	0.574	0	RPCs	APLP1
C4orf48.1	0	-1.53795	0.293	0.658	0	RPCs	C4orf48
GNG3.1	0	-1.55035	0.062	0.491	0	RPCs	GNG3
NREP	0	-1.58987	0.464	0.854	0	RPCs	NREP
SCG5.1	0	-1.59286	0.113	0.55	0	RPCs	SCG5
SOX4.1	0	-1.61038	0.963	0.991	0	RPCs	SOX4
TUBB2B.1	0	-1.6412	0.92	0.979	0	RPCs	TUBB2B
ELAVL3.1	0	-1.65099	0.092	0.627	0	RPCs	ELAVL3
UCHL1.1	0	-1.70342	0.311	0.637	0	RPCs	UCHL1
LMO4	0	-1.70343	0.246	0.497	0	RPCs	LMO4
RUNX1T1	0	-1.71172	0.028	0.502	0	RPCs	RUNX1T1
PTF1A.1	0	-1.75329	0.015	0.242	0	RPCs	PTF1A
JPT1.1	0	-1.79824	0.413	0.829	0	RPCs	JPT1
CRMP1.1	0	-1.81495	0.275	0.76	0	RPCs	CRMP1
BASP1.1	0	-1.82247	0.63	0.918	0	RPCs	BASP1
TMSB10.1	0	-1.84565	0.957	0.99	0	RPCs	TMSB10
PCSK1N.1	0	-1.86694	0.213	0.693	0	RPCs	PCSK1N
CELF4	0	-1.89214	0.052	0.564	0	RPCs	CELF4
TUBB2A.1	0	-1.90935	0.381	0.73	0	RPCs	TUBB2A
ONECUT2.1	0	-1.93528	0.023	0.375	0	RPCs	ONECUT2
SNCG.1	0	-1.95317	0.126	0.348	0	RPCs	SNCG
MEIS2	1.39464e-237	-1.95483	0.238	0.393	3.57935e-233	RPCs	MEIS2
STMN4.1	0	-1.95491	0.135	0.63	0	RPCs	STMN4
TAGLN3.1	0	-1.99297	0.233	0.783	0	RPCs	TAGLN3
TFAP2B.1	0	-2.02049	0.045	0.419	0	RPCs	TFAP2B
INA.1	0	-2.03352	0.096	0.637	0	RPCs	INA
NSG1.1	0	-2.04125	0.1	0.563	0	RPCs	NSG1
GAP43.1	0	-2.16897	0.15	0.446	0	RPCs	GAP43
TFAP2A.1	0	-2.21886	0.069	0.449	0	RPCs	TFAP2A
PRPH.1	0	-2.24127	0.069	0.235	0	RPCs	PRPH
MLLT11.1	0	-2.2495	0.28	0.81	0	RPCs	MLLT11
CD24.1	0	-2.52804	0.221	0.819	0	RPCs	CD24
RTN1.1	0	-2.60384	0.165	0.723	0	RPCs	RTN1
STMN2.1	0	-3.55109	0.408	0.915	0	RPCs	STMN2
PTF1A.2	0	2.53325	0.7	0.065	0	T2	PTF1A
NEUROD4.2	0	1.94084	0.516	0.123	0	T2	NEUROD4
PRDM13.1	0	1.89518	0.602	0.055	0	T2	PRDM13
FAM162A.1	0	1.59149	0.683	0.318	0	T2	FAM162A
SPATS2L.1	0	1.58952	0.489	0.084	0	T2	SPATS2L
HIF1A	0	1.55704	0.794	0.439	0	T2	HIF1A
IGFBP2	0	1.54917	0.798	0.547	0	T2	IGFBP2
ACKR3	0	1.50264	0.433	0.045	0	T2	ACKR3
SOX11.1	0	1.4084	0.904	0.638	0	T2	SOX11
BNIP3.1	0	1.35009	0.876	0.608	0	T2	BNIP3
CCK	2.81919e-234	1.30278	0.113	0.014	7.23546e-230	T2	CCK
RBP1	0	1.29083	0.961	0.844	0	T2	RBP1
GAL	0	1.27303	0.117	0.009	0	T2	GAL
ST18	0	1.25976	0.433	0.054	0	T2	ST18
CD9	0	1.22434	0.229	0.037	0	T2	CD9
ENO1	0	1.16259	0.97	0.9	0	T2	ENO1
GATM	0	1.11325	0.31	0.039	0	T2	GATM
THBS3	0	1.08584	0.356	0.051	0	T2	THBS3
PGK1.1	0	1.07507	0.883	0.661	0	T2	PGK1
GADD45A.1	5.47265e-216	1.06587	0.459	0.234	1.40456e-211	T2	GADD45A
CCNG2.1	0	1.05068	0.581	0.28	0	T2	CCNG2
KIRREL2	0	1.01373	0.294	0.017	0	T2	KIRREL2
PPP1R14A	0	1.00212	0.275	0.038	0	T2	PPP1R14A
PARP1	1.30984e-279	1.001	0.693	0.468	3.36171e-275	T2	PARP1
CXXC5.1	0	0.985994	0.856	0.586	0	T2	CXXC5
DNM1.1	7.50148e-282	0.968041	0.411	0.167	1.92526e-277	T2	DNM1
PTMS.2	0	0.962551	0.959	0.829	0	T2	PTMS
TPI1	0	0.961839	0.964	0.859	0	T2	TPI1
PDLIM4.1	1.3332e-247	0.958664	0.448	0.206	3.42167e-243	T2	PDLIM4
LINC00599.1	0	0.92382	0.52	0.201	0	T2	LINC00599
STC2	0	0.923192	0.301	0.065	0	T2	STC2
SETBP1	0	0.920283	0.39	0.114	0	T2	SETBP1
VEGFA	2.83109e-163	0.917939	0.505	0.306	7.26601e-159	T2	VEGFA
SOX4.2	0	0.889642	0.993	0.977	0	T2	SOX4
ONECUT2.2	1.37086e-174	0.889125	0.408	0.198	3.51831e-170	T2	ONECUT2
LIMD2	8.8924e-221	0.858557	0.45	0.228	2.28223e-216	T2	LIMD2
TNNI1	0	0.844561	0.144	0.016	0	T2	TNNI1
RNF165	1.12591e-240	0.838361	0.641	0.397	2.88965e-236	T2	RNF165
CABP1	0	0.837012	0.337	0.08	0	T2	CABP1
LOXL1	2.8384e-213	0.833791	0.31	0.119	7.28475e-209	T2	LOXL1
NDUFA4L2	3.82301e-190	0.833021	0.129	0.025	9.81176e-186	T2	NDUFA4L2
MIF.2	8.77994e-205	0.820116	0.832	0.679	2.25337e-200	T2	MIF
SLCO5A1	0	0.81354	0.391	0.135	0	T2	SLCO5A1
SPON2	0	0.810183	0.222	0.021	0	T2	SPON2
RUNX1T1.1	5.95206e-253	0.803956	0.542	0.264	1.5276e-248	T2	RUNX1T1
DDIT4	9.11053e-152	0.792521	0.771	0.637	2.33822e-147	T2	DDIT4
PLXNA2.1	0	0.791796	0.36	0.098	0	T2	PLXNA2
PHC2	1.3572e-210	0.769715	0.564	0.34	3.48326e-206	T2	PHC2
CCDC88A.1	1.01097e-223	0.74538	0.809	0.637	2.59465e-219	T2	CCDC88A
GAPDH	0	0.744299	0.999	0.99	0	T2	GAPDH
MSRB1	3.30576e-274	0.734356	0.234	0.058	8.48424e-270	T2	MSRB1
KDM6B	2.85347e-190	0.731716	0.448	0.233	7.32344e-186	T2	KDM6B
SLC16A3.1	1.02279e-164	0.727545	0.355	0.171	2.62499e-160	T2	SLC16A3
LDHA	4.03682e-278	0.723462	0.93	0.825	1.03605e-273	T2	LDHA
ZNF385A	8.35354e-227	0.721639	0.668	0.437	2.14394e-222	T2	ZNF385A
AL391650.1.1	6.44595e-192	0.720273	0.66	0.436	1.65435e-187	T2	AL391650.1
CYB5A	6.048e-127	0.717225	0.279	0.135	1.55222e-122	T2	CYB5A
NHLH2.2	5.68884e-145	0.715309	0.326	0.158	1.46004e-140	T2	NHLH2
SSR4	4.45653e-224	0.707763	0.761	0.583	1.14377e-219	T2	SSR4
NREP.1	7.1606e-298	0.706499	0.897	0.657	1.83777e-293	T2	NREP
ORAI2	3.56926e-159	0.703726	0.354	0.176	9.1605e-155	T2	ORAI2
GPC2.1	3.76107e-219	0.703038	0.554	0.302	9.65279e-215	T2	GPC2
MYO10.2	1.22337e-83	-0.702012	0.172	0.328	3.13978e-79	T2	MYO10
LINC01833.1	5.98077e-109	-0.704228	0.237	0.433	1.53497e-104	T2	LINC01833
AES	9.0454e-186	-0.707897	0.285	0.562	2.3215e-181	T2	AES
LGI4.2	4.71273e-116	-0.720068	0.071	0.252	1.20952e-111	T2	LGI4
VSX2.2	1.89564e-128	-0.727012	0.054	0.241	4.86516e-124	T2	VSX2
CADM1.1	2.10111e-146	-0.735571	0.325	0.563	5.39251e-142	T2	CADM1
CREB5.2	1.46942e-115	-0.73607	0.071	0.248	3.77128e-111	T2	CREB5
MEIS2.1	1.03204e-27	-0.740088	0.245	0.339	2.64874e-23	T2	MEIS2
RTN4.1	2.41449e-274	-0.740222	0.86	0.922	6.19679e-270	T2	RTN4
FABP7.2	1.37224e-78	-0.747116	0.384	0.536	3.52185e-74	T2	FABP7
STON2.1	6.17048e-144	-0.756244	0.137	0.363	1.58365e-139	T2	STON2
CCDC34.2	8.41972e-121	-0.757366	0.164	0.37	2.16092e-116	T2	CCDC34
AC009041.2.2	5.90748e-118	-0.761144	0.035	0.203	1.51616e-113	T2	AC009041.2
KDR.2	1.11417e-132	-0.767001	0.028	0.208	2.85951e-128	T2	KDR
IER2.1	1.44279e-90	-0.770143	0.433	0.576	3.70293e-86	T2	IER2
SLC1A3.2	2.18001e-116	-0.771039	0.07	0.247	5.59501e-112	T2	SLC1A3
EEF1A2.2	3.84132e-64	-0.773803	0.093	0.212	9.85874e-60	T2	EEF1A2
AL512380.1.1	2.31061e-64	-0.776379	0.041	0.149	5.93019e-60	T2	AL512380.1
HES4.2	9.97265e-162	-0.786707	0.296	0.561	2.55948e-157	T2	HES4
MYB.2	3.81036e-135	-0.803274	0.107	0.313	9.77928e-131	T2	MYB
RALYL.1	4.52349e-101	-0.808362	0.053	0.213	1.16095e-96	T2	RALYL
COL2A1.2	6.21527e-153	-0.818476	0.033	0.236	1.59515e-148	T2	COL2A1
BAMBI.2	6.35997e-117	-0.826329	0.121	0.308	1.63229e-112	T2	BAMBI
NRN1.2	2.0976e-56	-0.828542	0.059	0.159	5.38348e-52	T2	NRN1
JUN.2	1.27035e-105	-0.838998	0.691	0.793	3.26035e-101	T2	JUN
GATB.2	4.71745e-146	-0.867368	0.107	0.326	1.21073e-141	T2	GATB
JUNB.2	1.78603e-62	-0.876032	0.269	0.4	4.58385e-58	T2	JUNB
OLFM1.2	8.36097e-51	-0.880817	0.106	0.206	2.14584e-46	T2	OLFM1
LIMCH1.2	1.87847e-181	-0.888593	0.046	0.285	4.8211e-177	T2	LIMCH1
DUSP1.2	2.54441e-107	-0.898206	0.465	0.63	6.53022e-103	T2	DUSP1
FOSB.2	1.54929e-147	-0.908915	0.065	0.274	3.97626e-143	T2	FOSB
CKB.2	0	-0.921495	0.944	0.985	0	T2	CKB
ISL1.2	9.43751e-72	-0.927699	0.047	0.162	2.42214e-67	T2	ISL1
GAS1.2	3.75173e-109	-0.928354	0.099	0.272	9.6288e-105	T2	GAS1
TUBB2A.2	4.01851e-70	-0.933435	0.511	0.591	1.03135e-65	T2	TUBB2A
NEFM.2	1.52684e-24	-0.946686	0.15	0.214	3.91862e-20	T2	NEFM
SELENOP.2	2.36349e-156	-0.961543	0.146	0.373	6.06589e-152	T2	SELENOP
NSG1.2	1.05106e-70	-0.964966	0.26	0.381	2.69755e-66	T2	NSG1
PLP1.2	1.03038e-163	-0.980393	0.046	0.263	2.64448e-159	T2	PLP1
QDPR.2	9.01301e-161	-0.986936	0.162	0.401	2.31319e-156	T2	QDPR
TUBA1B.1	9.30068e-244	-1.02174	0.68	0.795	2.38702e-239	T2	TUBA1B
ID1.2	3.47147e-158	-1.02609	0.22	0.452	8.90953e-154	T2	ID1
RAX.2	2.25414e-180	-1.03111	0.24	0.489	5.78526e-176	T2	RAX
ELAVL4.2	1.97286e-120	-1.03654	0.051	0.223	5.06335e-116	T2	ELAVL4
PRSS35.2	1.26019e-150	-1.03745	0.04	0.242	3.23429e-146	T2	PRSS35
SOX9.2	2.80682e-197	-1.06452	0.187	0.454	7.20369e-193	T2	SOX9
NEFL.2	6.34976e-40	-1.06996	0.144	0.235	1.62967e-35	T2	NEFL
GPM6B.2	2.3332e-201	-1.07488	0.316	0.566	5.98815e-197	T2	GPM6B
ID4.2	3.99972e-187	-1.09314	0.159	0.417	1.02653e-182	T2	ID4
FXYD1.2	9.50885e-215	-1.10402	0.091	0.365	2.44045e-210	T2	FXYD1
EGR1.2	4.12628e-111	-1.10721	0.131	0.309	1.05901e-106	T2	EGR1
GAP43.2	1.2209e-07	-1.11476	0.317	0.32	0.00313343	T2	GAP43
MAP1B.1	0	-1.15546	0.687	0.875	0	T2	MAP1B
SNCG.2	1.01215e-23	-1.18584	0.203	0.261	2.59768e-19	T2	SNCG
TLE4	0	-1.21039	0.115	0.495	0	T2	TLE4
ASCL1.2	3.94955e-174	-1.26018	0.209	0.441	1.01365e-169	T2	ASCL1
TTYH1.2	2.17159e-254	-1.38284	0.24	0.524	5.57339e-250	T2	TTYH1
SOX2.2	4.33907e-193	-1.41536	0.39	0.57	1.11362e-188	T2	SOX2
SAT1.2	9.3468e-167	-1.47626	0.26	0.487	2.39886e-162	T2	SAT1
ID3.2	3.66903e-178	-1.51175	0.125	0.368	9.41656e-174	T2	ID3
TF.2	4.52651e-159	-1.53795	0.095	0.317	1.16173e-154	T2	TF
MEG3	0	-1.60169	0.261	0.673	0	T2	MEG3
CYR61.2	2.45121e-250	-1.6345	0.065	0.356	6.29103e-246	T2	CYR61
ZFP36L1.2	0	-1.71452	0.17	0.501	0	T2	ZFP36L1
SFRP2.2	1.64754e-282	-1.72339	0.156	0.467	4.2284e-278	T2	SFRP2
PRPH.2	6.49217e-53	-1.74066	0.078	0.176	1.66621e-48	T2	PRPH
VIM.2	0	-1.7936	0.74	0.844	0	T2	VIM
SPP1.2	0	-1.85522	0.263	0.61	0	T2	SPP1
FOS.2	0	-2.04258	0.467	0.723	0	T2	FOS
ZFP36L2.2	0	-2.1932	0.254	0.578	0	T2	ZFP36L2
HES1.2	7.7687e-300	-2.31751	0.191	0.507	1.99384e-295	T2	HES1
CCND1.2	0	-2.45612	0.217	0.591	0	T2	CCND1
ATOH7.1	0	3.10188	0.478	0.07	0	T1	ATOH7
OTX2.2	0	2.96381	0.819	0.103	0	T1	OTX2
NEUROD1.1	0	2.48524	0.823	0.185	0	T1	NEUROD1
VXN	0	2.32697	0.611	0.023	0	T1	VXN
HES6.1	0	2.28236	0.95	0.443	0	T1	HES6
GADD45G.1	0	2.13366	0.783	0.277	0	T1	GADD45G
FAM131C.1	0	2.0741	0.633	0.094	0	T1	FAM131C
MYBL1	0	1.8006	0.593	0.059	0	T1	MYBL1
GADD45A.2	0	1.79341	0.645	0.236	0	T1	GADD45A
SSX2IP.1	0	1.76585	0.632	0.176	0	T1	SSX2IP
NEUROD4.3	0	1.74591	0.675	0.139	0	T1	NEUROD4
OLIG2	0	1.54321	0.46	0.017	0	T1	OLIG2
PCBP4.1	0	1.51041	0.762	0.39	0	T1	PCBP4
INSM1.1	0	1.50204	0.633	0.194	0	T1	INSM1
CSRP2	7.03894e-291	1.4411	0.792	0.454	1.80654e-286	T1	CSRP2
RASD1	0	1.42546	0.587	0.168	0	T1	RASD1
NEUROG2	0	1.40731	0.385	0.031	0	T1	NEUROG2
DLL4	0	1.3941	0.496	0.062	0	T1	DLL4
MPPED2	0	1.37632	0.746	0.324	0	T1	MPPED2
MFNG	0	1.35573	0.497	0.041	0	T1	MFNG
STK39	0	1.31034	0.481	0.104	0	T1	STK39
FAM89A	0	1.28968	0.459	0.095	0	T1	FAM89A
DLL3	7.70925e-302	1.23885	0.523	0.179	1.97858e-297	T1	DLL3
RGS16.1	5.17861e-245	1.23242	0.835	0.49	1.32909e-240	T1	RGS16
2004-09-01	0	1.2151	0.491	0.15	0	T1	2004-09-01
GNG5	0	1.20198	0.864	0.516	0	T1	GNG5
KLHDC8A	0	1.19721	0.401	0.069	0	T1	KLHDC8A
PTH2	1.9897e-159	1.19299	0.204	0.047	5.10655e-155	T1	PTH2
SMAD2	2.72584e-287	1.18848	0.726	0.357	6.99586e-283	T1	SMAD2
MFAP4	0	1.18549	0.367	0.035	0	T1	MFAP4
SESN3	2.34982e-281	1.17554	0.48	0.154	6.0308e-277	T1	SESN3
CRX	0	1.15623	0.342	0.035	0	T1	CRX
SEMA5A	0	1.12087	0.448	0.119	0	T1	SEMA5A
SH3BGRL3.1	4.24088e-175	1.12019	0.682	0.408	1.08842e-170	T1	SH3BGRL3
PIK3R1	8.87408e-138	1.11709	0.549	0.307	2.27753e-133	T1	PIK3R1
NELL2	2.81505e-272	1.0962	0.678	0.316	7.22481e-268	T1	NELL2
RORB.1	0	1.09437	0.988	0.932	0	T1	RORB
MSI1.1	1.55229e-271	1.09135	0.772	0.417	3.98395e-267	T1	MSI1
MIAT	1.59516e-226	1.08765	0.891	0.652	4.09399e-222	T1	MIAT
BSG	3.82191e-283	1.07555	0.914	0.714	9.80894e-279	T1	BSG
FABP7.3	2.42708e-31	1.07477	0.614	0.51	6.22909e-27	T1	FABP7
PRDM1	0	1.04548	0.262	0.028	0	T1	PRDM1
CBFA2T2	0	1.03607	0.472	0.125	0	T1	CBFA2T2
AMER2	5.55119e-140	1.02414	0.639	0.396	1.42471e-135	T1	AMER2
HNRNPH3	1.18027e-261	1.01705	0.884	0.678	3.02916e-257	T1	HNRNPH3
PAK3	2.67652e-236	1.01096	0.524	0.205	6.86928e-232	T1	PAK3
ZEB1	8.45982e-246	1.00197	0.573	0.234	2.17121e-241	T1	ZEB1
PFN2	4.25371e-148	0.997303	0.644	0.394	1.09171e-143	T1	PFN2
TTC14	2.36504e-187	0.995507	0.63	0.336	6.06987e-183	T1	TTC14
CCNG2.2	1.26839e-196	0.99288	0.612	0.298	3.25533e-192	T1	CCNG2
CRYBG3	0	0.978531	0.377	0.076	0	T1	CRYBG3
SRRM4.1	2.50525e-241	0.976328	0.588	0.238	6.42973e-237	T1	SRRM4
NEUROG1	0	0.972049	0.21	0.004	0	T1	NEUROG1
CCDC181	2.98823e-247	0.959619	0.461	0.152	7.66929e-243	T1	CCDC181
DSP	1.07503e-240	0.950365	0.366	0.1	2.75907e-236	T1	DSP
RBP1.1	0	0.940472	0.975	0.851	0	T1	RBP1
ZBTB18	2.40429e-238	0.939625	0.509	0.179	6.17061e-234	T1	ZBTB18
RXRG	2.59145e-209	0.927757	0.328	0.094	6.65096e-205	T1	RXRG
RHOBTB3	1.77673e-185	0.927559	0.719	0.43	4.55999e-181	T1	RHOBTB3
ALDH7A1	1.85395e-122	0.910312	0.517	0.286	4.75817e-118	T1	ALDH7A1
TRH	2.0896e-33	0.883023	0.443	0.334	5.36295e-29	T1	TRH
GRAMD2B	0	0.875838	0.257	0.012	0	T1	GRAMD2B
SHD	2.19621e-267	0.844011	0.381	0.098	5.63657e-263	T1	SHD
SERPINF1	0	0.839764	0.291	0.042	0	T1	SERPINF1
FRYL	1.29781e-145	0.838917	0.559	0.286	3.33083e-141	T1	FRYL
RBPJ	1.04009e-179	0.837404	0.838	0.595	2.66939e-175	T1	RBPJ
CHRNA1	0	0.835762	0.259	0.006	0	T1	CHRNA1
UBE2S	1.02005e-42	0.82905	0.574	0.435	2.61796e-38	T1	UBE2S
TLE3	2.2358e-160	0.828642	0.484	0.21	5.73818e-156	T1	TLE3
TMEM123.2	5.93791e-195	0.827255	0.631	0.29	1.52396e-190	T1	TMEM123
GOLIM4	3.47329e-163	0.826349	0.448	0.185	8.9142e-159	T1	GOLIM4
HIST1H1C	3.06113e-131	0.823825	0.404	0.168	7.85639e-127	T1	HIST1H1C
DLL1	3.31507e-257	0.823734	0.275	0.055	8.50812e-253	T1	DLL1
ZHX1	4.40894e-160	0.822111	0.485	0.219	1.13155e-155	T1	ZHX1
MIR7-3HG	3.78523e-224	0.811809	0.283	0.065	9.71479e-220	T1	MIR7-3HG
ODC1	8.35986e-155	0.811056	0.778	0.519	2.14556e-150	T1	ODC1
KCNK3	0	0.809589	0.287	0.042	0	T1	KCNK3
DST	6.42133e-141	0.806772	0.748	0.495	1.64803e-136	T1	DST
KLHL35.1	7.50815e-80	0.803169	0.256	0.11	1.92697e-75	T1	KLHL35
NRL	8.82287e-106	0.801709	0.418	0.191	2.26439e-101	T1	NRL
CKB.3	3.81626e-222	0.795493	1	0.978	9.79444e-218	T1	CKB
TMX1	2.73686e-151	0.786561	0.485	0.224	7.02414e-147	T1	TMX1
PCSK2	3.94975e-140	0.783091	0.34	0.131	1.0137e-135	T1	PCSK2
RAX.3	2.11068e-168	0.779933	0.775	0.436	5.41706e-164	T1	RAX
VSX2.3	8.49939e-109	0.765939	0.427	0.203	2.18137e-104	T1	VSX2
MDK.2	8.93059e-105	0.760827	0.81	0.632	2.29204e-100	T1	MDK
ATP2B1	9.157e-113	0.742612	0.497	0.268	2.35014e-108	T1	ATP2B1
ASCL1.3	7.3734e-122	0.734153	0.694	0.392	1.89238e-117	T1	ASCL1
CHD7	5.76348e-127	0.733279	0.712	0.459	1.4792e-122	T1	CHD7
RCOR2	2.81643e-120	0.731228	0.492	0.256	7.22838e-116	T1	RCOR2
MIB1	6.65001e-136	0.730024	0.423	0.186	1.70673e-131	T1	MIB1
EML4	1.7793e-123	0.724167	0.354	0.143	4.56656e-119	T1	EML4
RHBDL3	5.99573e-298	0.722071	0.314	0.061	1.5388e-293	T1	RHBDL3
TFDP2.2	5.09218e-134	0.716393	0.699	0.43	1.30691e-129	T1	TFDP2
KREMEN1	2.12874e-190	0.705142	0.317	0.09	5.46341e-186	T1	KREMEN1
COMT	9.52128e-124	0.703754	0.59	0.343	2.44364e-119	T1	COMT
TCF4.2	4.57788e-154	0.702531	0.858	0.56	1.17491e-149	T1	TCF4
DPYSL2.2	8.07843e-56	-0.700545	0.425	0.563	2.07333e-51	T1	DPYSL2
LRRN3	4.10501e-62	-0.701167	0.136	0.337	1.05355e-57	T1	LRRN3
PBX1	6.31279e-50	-0.705583	0.281	0.458	1.62018e-45	T1	PBX1
ID2.1	6.54102e-39	-0.708516	0.241	0.388	1.67875e-34	T1	ID2
GPI.1	6.2983e-67	-0.710329	0.195	0.395	1.61646e-62	T1	GPI
PMEPA1.2	6.79096e-41	-0.710627	0.423	0.544	1.7429e-36	T1	PMEPA1
LY6H.2	1.37143e-70	-0.729119	0.035	0.22	3.51978e-66	T1	LY6H
GAD2.1	4.4864e-41	-0.73099	0.036	0.156	1.15143e-36	T1	GAD2
PHPT1.1	4.68327e-86	-0.731064	0.243	0.474	1.20196e-81	T1	PHPT1
MIR124-2HG.1	1.02398e-52	-0.735123	0.148	0.321	2.62806e-48	T1	MIR124-2HG
NES.2	8.99696e-55	-0.743406	0.158	0.332	2.30907e-50	T1	NES
TRPM3.1	4.84471e-68	-0.746089	0.067	0.258	1.24339e-63	T1	TRPM3
QDPR.3	7.67355e-40	-0.746454	0.233	0.38	1.96942e-35	T1	QDPR
PODXL2.2	1.325e-61	-0.748027	0.212	0.394	3.40062e-57	T1	PODXL2
ID1.3	2.31865e-23	-0.749304	0.352	0.428	5.95082e-19	T1	ID1
GRIA2.1	2.39875e-82	-0.758382	0.027	0.233	6.1564e-78	T1	GRIA2
METRN.2	2.98266e-47	-0.758892	0.199	0.356	7.65501e-43	T1	METRN
ARL6IP5.1	7.45032e-84	-0.763833	0.18	0.41	1.91212e-79	T1	ARL6IP5
FAT3	4.86807e-60	-0.769714	0.081	0.259	1.24939e-55	T1	FAT3
CNTNAP2.1	2.312e-32	-0.770605	0.037	0.138	5.93374e-28	T1	CNTNAP2
NRN1.3	2.04754e-27	-0.77668	0.059	0.153	5.25501e-23	T1	NRN1
TMSB10.2	1.30964e-41	-0.776947	0.988	0.975	3.36119e-37	T1	TMSB10
CITED2	3.06795e-75	-0.787757	0.217	0.441	7.8739e-71	T1	CITED2
PKIA.2	1.61001e-81	-0.792417	0.183	0.412	4.13208e-77	T1	PKIA
ZNF385D.1	1.03881e-49	-0.792596	0.296	0.468	2.66611e-45	T1	ZNF385D
CLU.2	3.71776e-72	-0.798293	0.493	0.66	9.54164e-68	T1	CLU
PLP1.3	4.91907e-51	-0.800894	0.089	0.245	1.26248e-46	T1	PLP1
DAAM1	2.44731e-103	-0.801659	0.522	0.715	6.28102e-99	T1	DAAM1
NRXN1.1	4.45782e-58	-0.811764	0.104	0.284	1.1441e-53	T1	NRXN1
ANK3.1	1.11215e-73	-0.813654	0.105	0.318	2.85432e-69	T1	ANK3
PRSS35.3	4.09718e-39	-0.814107	0.094	0.224	1.05154e-34	T1	PRSS35
HES4.3	4.58448e-54	-0.829682	0.372	0.538	1.17661e-49	T1	HES4
CRMP1.2	6.08298e-50	-0.842908	0.486	0.557	1.5612e-45	T1	CRMP1
AP1S2.1	4.736e-82	-0.843933	0.168	0.398	1.21549e-77	T1	AP1S2
AL512380.1.2	4.96386e-41	-0.847233	0.026	0.142	1.27397e-36	T1	AL512380.1
EEF1A2.3	7.82912e-45	-0.847332	0.068	0.206	2.00934e-40	T1	EEF1A2
NREP.2	1.79343e-84	-0.85249	0.602	0.694	4.60284e-80	T1	NREP
ZFHX4.1	7.86164e-68	-0.870865	0.078	0.27	2.01769e-63	T1	ZFHX4
ONECUT2.3	5.08895e-12	-0.873953	0.168	0.229	1.30608e-07	T1	ONECUT2
ZFP36L2.3	1.55113e-11	-0.884141	0.587	0.533	3.98097e-07	T1	ZFP36L2
RAB3A.2	1.53764e-99	-0.890307	0.052	0.294	3.94635e-95	T1	RAB3A
TLE4.1	1.86201e-90	-0.897945	0.22	0.462	4.77886e-86	T1	TLE4
PTF1A.3	1.3241e-21	-0.902769	0.069	0.151	3.39831e-17	T1	PTF1A
ISL1.3	7.0045e-35	-0.905142	0.047	0.154	1.7977e-30	T1	ISL1
AL391650.1.2	1.40765e-99	-0.90522	0.217	0.481	3.61272e-95	T1	AL391650.1
RALYL.2	3.70546e-70	-0.908049	0.024	0.204	9.51006e-66	T1	RALYL
PAFAH1B3.2	5.54489e-100	-0.910079	0.382	0.582	1.42309e-95	T1	PAFAH1B3
DCX.2	3.1873e-85	-0.9256	0.098	0.323	8.18022e-81	T1	DCX
MGST3.1	1.59306e-113	-0.92881	0.369	0.588	4.08859e-109	T1	MGST3
TUBB2B.2	1.38399e-93	-0.929851	0.956	0.954	3.552e-89	T1	TUBB2B
OLFM1.3	9.06475e-42	-0.932008	0.07	0.201	2.32647e-37	T1	OLFM1
ZFP36L1.3	9.852e-38	-0.941138	0.382	0.464	2.52852e-33	T1	ZFP36L1
ENO2.2	5.29695e-83	-0.941145	0.188	0.406	1.35946e-78	T1	ENO2
PPP1R1A.2	3.10756e-94	-0.942425	0.044	0.273	7.97556e-90	T1	PPP1R1A
RBFOX2.2	7.55275e-87	-0.942829	0.194	0.418	1.93841e-82	T1	RBFOX2
ZFHX3.1	1.00169e-59	-0.957264	0.107	0.287	2.57084e-55	T1	ZFHX3
C4orf48.2	4.04368e-62	-0.961644	0.37	0.511	1.03781e-57	T1	C4orf48
NTM.2	1.64178e-94	-0.981086	0.055	0.293	4.21362e-90	T1	NTM
KIF5C.2	1.64283e-78	-1.00014	0.227	0.428	4.21631e-74	T1	KIF5C
GRIA4	2.83733e-114	-1.00774	0.123	0.407	7.282e-110	T1	GRIA4
FEZ1.1	1.13228e-126	-1.01275	0.066	0.359	2.90601e-122	T1	FEZ1
NSG2.1	1.94883e-85	-1.01489	0.067	0.288	5.00168e-81	T1	NSG2
SNCA.2	4.48439e-62	-1.01639	0.091	0.271	1.15092e-57	T1	SNCA
SFRP2.3	3.34627e-30	-1.0173	0.354	0.433	8.5882e-26	T1	SFRP2
NEFL.3	4.90182e-21	-1.02082	0.14	0.229	1.25805e-16	T1	NEFL
MIR181A1HG.1	6.05669e-72	-1.0341	0.09	0.288	1.55445e-67	T1	MIR181A1HG
MAPT.2	1.73927e-108	-1.05682	0.05	0.305	4.46384e-104	T1	MAPT
APLP1.2	7.82619e-114	-1.06402	0.12	0.387	2.00859e-109	T1	APLP1
NEFM.3	3.04926e-28	-1.06493	0.109	0.213	7.82592e-24	T1	NEFM
MLLT11.2	9.29075e-66	-1.0655	0.504	0.589	2.38447e-61	T1	MLLT11
PCP4.1	3.85064e-19	-1.06818	0.084	0.162	9.88267e-15	T1	PCP4
GNG3.2	4.95533e-95	-1.0774	0.088	0.323	1.27179e-90	T1	GNG3
VIM.3	6.64352e-47	-1.08608	0.872	0.828	1.70506e-42	T1	VIM
FOS.3	1.4615e-42	-1.11254	0.611	0.695	3.75093e-38	T1	FOS
TUBA1A.2	1.64991e-158	-1.12649	0.989	0.992	4.23449e-154	T1	TUBA1A
CD24.2	1.97106e-83	-1.13321	0.421	0.573	5.05873e-79	T1	CD24
SCG5.2	6.99599e-98	-1.1353	0.141	0.379	1.79552e-93	T1	SCG5
CRABP1.1	1.53337e-212	-1.13545	0.948	0.958	3.93539e-208	T1	CRABP1
DKK3.2	2.3766e-142	-1.1491	0.365	0.639	6.09954e-138	T1	DKK3
RUNX1T1.2	4.15901e-111	-1.16978	0.052	0.317	1.06741e-106	T1	RUNX1T1
CYR61.3	8.32607e-58	-1.19451	0.159	0.33	2.13689e-53	T1	CYR61
RND3.1	5.79983e-74	-1.21681	0.147	0.359	1.48853e-69	T1	RND3
ID3.3	1.69684e-54	-1.21727	0.174	0.348	4.35495e-50	T1	ID3
UCHL1.2	8.12683e-71	-1.21823	0.347	0.508	2.08575e-66	T1	UCHL1
PCDH9.1	4.19196e-103	-1.23795	0.072	0.325	1.07587e-98	T1	PCDH9
PAX6.1	1.01277e-298	-1.24533	0.735	0.919	2.59927e-294	T1	PAX6
TTYH1.3	1.73428e-91	-1.28579	0.314	0.499	4.45102e-87	T1	TTYH1
CELF4.1	1.15289e-107	-1.29678	0.099	0.362	2.95889e-103	T1	CELF4
SAT1.3	7.46112e-65	-1.31644	0.285	0.47	1.9149e-60	T1	SAT1
INA.2	1.78391e-120	-1.36507	0.156	0.423	4.57842e-116	T1	INA
SNCG.3	4.22499e-34	-1.37391	0.142	0.261	1.08434e-29	T1	SNCG
LMO4.1	1.63685e-79	-1.51146	0.179	0.405	4.20098e-75	T1	LMO4
PCSK1N.2	1.5505e-159	-1.5249	0.199	0.508	3.97935e-155	T1	PCSK1N
TFAP2B.2	3.5557e-92	-1.53491	0.051	0.274	9.1257e-88	T1	TFAP2B
TF.3	4.63077e-75	-1.56254	0.102	0.302	1.18849e-70	T1	TF
HES1.3	6.54086e-72	-1.5809	0.304	0.478	1.67871e-67	T1	HES1
NSG1.3	1.51925e-132	-1.59861	0.094	0.384	3.89916e-128	T1	NSG1
STMN4.2	1.20478e-150	-1.60194	0.13	0.439	3.09208e-146	T1	STMN4
MEIS2.2	9.43112e-41	-1.63004	0.199	0.336	2.4205e-36	T1	MEIS2
GAP43.3	8.21793e-67	-1.68817	0.146	0.332	2.10913e-62	T1	GAP43
TUBB2A.3	3.47629e-166	-1.698	0.315	0.599	8.9219e-162	T1	TUBB2A
TFAP2A.2	3.7748e-90	-1.72876	0.078	0.301	9.68802e-86	T1	TFAP2A
PRPH.3	2.5001e-36	-1.79196	0.058	0.171	6.4165e-32	T1	PRPH
RTN1.2	8.5527e-179	-2.01443	0.177	0.506	2.19505e-174	T1	RTN1
STMN2.2	7.95848e-203	-2.59493	0.501	0.712	2.04254e-198	T1	STMN2
ONECUT2.4	0	2.83262	0.908	0.154	0	HCs	ONECUT2
ONECUT1.1	0	2.72108	0.856	0.085	0	HCs	ONECUT1
CNTNAP2.2	0	2.65547	0.721	0.071	0	HCs	CNTNAP2
LHX1	0	2.30333	0.519	0.009	0	HCs	LHX1
CACNG3.1	0	2.07127	0.669	0.041	0	HCs	CACNG3
PROX1.1	0	2.06442	0.814	0.245	0	HCs	PROX1
TFAP2B.3	0	1.96875	0.898	0.193	0	HCs	TFAP2B
AL512380.1.3	0	1.86909	0.426	0.105	0	HCs	AL512380.1
ONECUT3	0	1.75193	0.577	0.024	0	HCs	ONECUT3
HTRA1	0	1.71469	0.552	0.05	0	HCs	HTRA1
C1QL1.1	0	1.71312	0.505	0.107	0	HCs	C1QL1
STMN4.3	0	1.66874	0.903	0.368	0	HCs	STMN4
STMN2.3	0	1.60497	0.989	0.669	0	HCs	STMN2
CXXC5.2	0	1.55268	0.936	0.587	0	HCs	CXXC5
NSG2.2	0	1.41066	0.727	0.227	0	HCs	NSG2
TNR	0	1.38472	0.366	0.005	0	HCs	TNR
FAM107B	0	1.36567	0.587	0.196	0	HCs	FAM107B
IER5L	0	1.33517	0.55	0.235	0	HCs	IER5L
CNTN4	0	1.32903	0.504	0.08	0	HCs	CNTN4
THSD7A	0	1.31279	0.63	0.208	0	HCs	THSD7A
PTF1A.4	4.60674e-288	1.23228	0.392	0.12	1.18232e-283	HCs	PTF1A
SOX4.3	0	1.16673	0.994	0.977	0	HCs	SOX4
TPM3	0	1.1285	0.685	0.345	0	HCs	TPM3
GRIA3	0	1.10739	0.344	0.035	0	HCs	GRIA3
MALT1	0	1.10093	0.387	0.095	0	HCs	MALT1
LHX1-DT	0	1.09817	0.289	0.004	0	HCs	LHX1-DT
TANC1	0	1.0747	0.416	0.085	0	HCs	TANC1
NHSL1	4.65669e-308	1.04711	0.585	0.271	1.19514e-303	HCs	NHSL1
YPEL2	0	1.04647	0.425	0.114	0	HCs	YPEL2
PCDH9.2	1.00181e-204	1.0389	0.537	0.285	2.57115e-200	HCs	PCDH9
B3GAT2	0	1.03129	0.344	0.06	0	HCs	B3GAT2
TLE4.2	2.0884e-168	0.997575	0.622	0.428	5.35988e-164	HCs	TLE4
LMO1	0	0.993672	0.322	0.045	0	HCs	LMO1
PPP1R1A.3	0	0.992942	0.608	0.222	0	HCs	PPP1R1A
RTN1.3	0	0.98242	0.922	0.44	0	HCs	RTN1
CDC42EP3	6.10741e-294	0.9714	0.501	0.203	1.56747e-289	HCs	CDC42EP3
RHOB	3.00576e-192	0.966339	0.637	0.403	7.71428e-188	HCs	RHOB
NDST3	0	0.955033	0.303	0.032	0	HCs	NDST3
AC016044.1	0	0.948428	0.301	0.008	0	HCs	AC016044.1
SEPT4.1	0	0.93451	0.442	0.144	0	HCs	2004-09-01
MAPT.3	0	0.926747	0.651	0.251	0	HCs	MAPT
NTRK2	0	0.921855	0.344	0.048	0	HCs	NTRK2
TMEFF2	0	0.919073	0.283	0.064	0	HCs	TMEFF2
ZEB2.1	2.69528e-272	0.915505	0.816	0.57	6.91745e-268	HCs	ZEB2
CAMK2N1.1	2.8153e-215	0.887831	0.727	0.474	7.22546e-211	HCs	CAMK2N1
DRD2	0	0.882881	0.243	0.008	0	HCs	DRD2
TAGLN3.2	0	0.871777	0.861	0.516	0	HCs	TAGLN3
ARL4C.1	2.20567e-191	0.855938	0.588	0.334	5.66085e-187	HCs	ARL4C
TFAP2A.3	0	0.853747	0.751	0.238	0	HCs	TFAP2A
NDRG4	6.67938e-244	0.851732	0.513	0.235	1.71426e-239	HCs	NDRG4
TMOD1	0	0.847259	0.226	0.003	0	HCs	TMOD1
LINGO1.2	2.20676e-263	0.846389	0.481	0.194	5.66364e-259	HCs	LINGO1
SCRT2.1	2.78886e-291	0.828504	0.403	0.132	7.15761e-287	HCs	SCRT2
NKAIN2	0	0.82363	0.235	0.016	0	HCs	NKAIN2
HIST3H2A	1.28308e-220	0.823549	0.674	0.406	3.29303e-216	HCs	HIST3H2A
MEGF11	0	0.809686	0.233	0.01	0	HCs	MEGF11
EVL.1	4.50388e-212	0.797798	0.707	0.437	1.15592e-207	HCs	EVL
APBB2.1	1.80645e-214	0.775565	0.423	0.175	4.63626e-210	HCs	APBB2
GALR2	0	0.772627	0.222	0.011	0	HCs	GALR2
PLXNA2.2	0	0.771782	0.398	0.104	0	HCs	PLXNA2
MEGF10	0	0.762854	0.251	0.024	0	HCs	MEGF10
TENM2	0	0.755743	0.26	0.052	0	HCs	TENM2
MT-ND1	4.47319e-295	0.754246	0.971	0.868	1.14804e-290	HCs	MT-ND1
MTSS1.1	2.19875e-160	0.747565	0.406	0.193	5.6431e-156	HCs	MTSS1
MAP7	2.56618e-283	0.743026	0.293	0.073	6.58611e-279	HCs	MAP7
CITED2.1	5.31781e-159	0.73919	0.634	0.405	1.36482e-154	HCs	CITED2
GPR85	1.11631e-257	0.737604	0.346	0.108	2.86502e-253	HCs	GPR85
ROBO2	5.04663e-152	0.724552	0.424	0.213	1.29522e-147	HCs	ROBO2
NDRG1	7.09713e-206	0.723095	0.408	0.163	1.82148e-201	HCs	NDRG1
FLRT3	1.32877e-272	0.719449	0.262	0.06	3.41028e-268	HCs	FLRT3
LINC01896	0	0.717445	0.182	0.006	0	HCs	LINC01896
LNP1	5.05227e-283	0.710299	0.272	0.063	1.29667e-278	HCs	LNP1
IGLON5.1	1.20821e-186	0.710042	0.473	0.227	3.10086e-182	HCs	IGLON5
MTRNR2L12	5.92484e-136	0.701374	0.65	0.452	1.52061e-131	HCs	MTRNR2L12
TBX2-AS1.2	1.39818e-99	-0.703134	0.09	0.291	3.58843e-95	HCs	TBX2-AS1
FEZF2.2	1.30891e-96	-0.703894	0.081	0.276	3.35932e-92	HCs	FEZF2
GRID2	6.74983e-111	-0.718715	0.041	0.244	1.73234e-106	HCs	GRID2
PLEKHA1.2	1.74658e-93	-0.72039	0.23	0.444	4.4826e-89	HCs	PLEKHA1
RALYL.3	3.35614e-56	-0.728422	0.071	0.205	8.61355e-52	HCs	RALYL
MCAM.2	6.94613e-87	-0.734632	0.022	0.181	1.78272e-82	HCs	MCAM
KDR.3	2.23879e-100	-0.741393	0.024	0.202	5.74586e-96	HCs	KDR
PTPRZ1.2	8.07423e-91	-0.741811	0.224	0.423	2.07225e-86	HCs	PTPRZ1
CADM2.1	8.30657e-100	-0.7482	0.175	0.396	2.13188e-95	HCs	CADM2
SORBS2	7.80981e-123	-0.751459	0.086	0.322	2.00439e-118	HCs	SORBS2
CA14.2	5.52068e-107	-0.751603	0.038	0.232	1.41688e-102	HCs	CA14
SSX2IP.2	1.25844e-93	-0.757305	0.044	0.222	3.22979e-89	HCs	SSX2IP
ANXA5	3.98516e-141	-0.759619	0.082	0.34	1.02279e-136	HCs	ANXA5
RND3.2	1.01208e-30	-0.760814	0.243	0.356	2.5975e-26	HCs	RND3
SNCG.4	3.05093e-09	-0.765578	0.338	0.245	7.83022e-05	HCs	SNCG
VSX2.4	4.90543e-112	-0.769257	0.036	0.236	1.25898e-107	HCs	VSX2
SMAD2.1	1.19764e-117	-0.769695	0.165	0.403	3.07373e-113	HCs	SMAD2
LGR4.2	1.28698e-110	-0.772145	0.238	0.467	3.30303e-106	HCs	LGR4
SPRY2.2	2.71141e-107	-0.775104	0.08	0.287	6.95885e-103	HCs	SPRY2
RCN1.1	5.93353e-143	-0.775714	0.246	0.511	1.52284e-138	HCs	RCN1
LAPTM4A	4.12711e-160	-0.777104	0.234	0.515	1.05922e-155	HCs	LAPTM4A
BHLHE22	5.33526e-88	-0.77968	0.03	0.193	1.36929e-83	HCs	BHLHE22
LGI4.3	3.06394e-116	-0.779873	0.039	0.249	7.86361e-112	HCs	LGI4
CRNDE.1	8.15626e-148	-0.785988	0.045	0.296	2.0933e-143	HCs	CRNDE
NEUROD4.4	4.20199e-14	-0.789112	0.128	0.178	1.07844e-09	HCs	NEUROD4
RGS16.2	2.37598e-23	-0.789284	0.471	0.516	6.09794e-19	HCs	RGS16
MAP1B.2	9.3759e-100	-0.79051	0.839	0.852	2.40633e-95	HCs	MAP1B
TOX3.2	7.60882e-108	-0.793738	0.195	0.418	1.9528e-103	HCs	TOX3
TAGLN2.1	2.83432e-135	-0.794616	0.069	0.311	7.27427e-131	HCs	TAGLN2
COL2A1.3	3.32836e-115	-0.801007	0.027	0.229	8.54224e-111	HCs	COL2A1
NRN1.4	2.52931e-43	-0.803656	0.055	0.156	6.49147e-39	HCs	NRN1
BNIP3.2	4.46675e-89	-0.810637	0.521	0.655	1.14639e-84	HCs	BNIP3
NFIB.2	4.40779e-103	-0.811358	0.044	0.235	1.13126e-98	HCs	NFIB
TPI1.1	6.32114e-203	-0.815147	0.762	0.884	1.62232e-198	HCs	TPI1
TBX2	5.1125e-129	-0.81704	0.128	0.376	1.31212e-124	HCs	TBX2
SMIM20.2	4.8149e-124	-0.817709	0.144	0.387	1.23574e-119	HCs	SMIM20
DDHD1.2	2.1054e-97	-0.818289	0.174	0.382	5.4035e-93	HCs	DDHD1
TRH.1	6.72329e-84	-0.822208	0.168	0.359	1.72553e-79	HCs	TRH
TMEM98.1	6.34027e-164	-0.822394	0.192	0.485	1.62723e-159	HCs	TMEM98
CSRP2.1	2.72376e-124	-0.823696	0.249	0.499	6.99052e-120	HCs	CSRP2
BSG.1	6.8385e-187	-0.846885	0.535	0.747	1.7551e-182	HCs	BSG
TFDP2.3	1.49604e-139	-0.857397	0.212	0.472	3.83958e-135	HCs	TFDP2
NEFM.4	4.16402e-15	-0.861401	0.154	0.211	1.0687e-10	HCs	NEFM
EGR1.3	2.97558e-42	-0.861978	0.18	0.298	7.63682e-38	HCs	EGR1
NOTCH1.2	3.13524e-138	-0.876877	0.049	0.29	8.04659e-134	HCs	NOTCH1
PBX1.1	1.21961e-128	-0.878061	0.212	0.471	3.13013e-124	HCs	PBX1
SYT1.1	3.69195e-142	-0.879919	0.546	0.734	9.47539e-138	HCs	SYT1
SLC1A3.3	6.0359e-122	-0.881806	0.033	0.244	1.54911e-117	HCs	SLC1A3
ILDR2.2	2.31385e-141	-0.886783	0.048	0.292	5.93851e-137	HCs	ILDR2
GNG5.1	1.15976e-155	-0.899778	0.304	0.563	2.97653e-151	HCs	GNG5
RBP1.2	1.69737e-180	-0.908212	0.759	0.869	4.35629e-176	HCs	RBP1
CRB1.2	4.07331e-149	-0.911818	0.06	0.314	1.04541e-144	HCs	CRB1
LINC01833.2	6.21719e-147	-0.912777	0.163	0.434	1.59564e-142	HCs	LINC01833
STON2.2	5.9769e-176	-0.915784	0.068	0.362	1.53397e-171	HCs	STON2
GATB.3	1.25035e-122	-0.925462	0.092	0.319	3.20903e-118	HCs	GATB
ID4.3	1.94042e-112	-0.925597	0.175	0.406	4.9801e-108	HCs	ID4
LIMCH1.3	4.17721e-148	-0.933528	0.032	0.277	1.07208e-143	HCs	LIMCH1
CCDC34.3	1.19845e-135	-0.934489	0.114	0.367	3.07583e-131	HCs	CCDC34
ZFHX4.2	3.21671e-136	-0.940553	0.043	0.28	8.25568e-132	HCs	ZFHX4
TMEM123.3	4.15833e-162	-0.944679	0.066	0.338	1.06724e-157	HCs	TMEM123
HMGCS1.1	2.8818e-92	-0.950983	0.193	0.383	7.39615e-88	HCs	HMGCS1
LHX2.2	2.50541e-153	-0.954044	0.075	0.337	6.43013e-149	HCs	LHX2
PCP4.2	3.23765e-17	-0.954182	0.102	0.163	8.30944e-13	HCs	PCP4
GNAI2.1	4.61573e-188	-0.959658	0.19	0.505	1.18463e-183	HCs	GNAI2
SOX9.3	4.319e-117	-0.962222	0.216	0.441	1.10847e-112	HCs	SOX9
VCAN	1.46825e-179	-0.965858	0.033	0.32	3.76828e-175	HCs	VCAN
MYB.3	2.91513e-155	-0.977163	0.051	0.311	7.48168e-151	HCs	MYB
NEFL.4	1.46203e-25	-0.987626	0.149	0.231	3.7523e-21	HCs	NEFL
RTN4.2	0	-0.995512	0.827	0.923	0	HCs	RTN4
BTG2.2	4.38102e-83	-1.00071	0.23	0.413	1.12439e-78	HCs	BTG2
TUBA1B.2	8.24672e-182	-1.0113	0.675	0.791	2.11652e-177	HCs	TUBA1B
LDHA.1	7.07716e-298	-1.02203	0.657	0.857	1.81635e-293	HCs	LDHA
ELAVL4.3	6.28915e-88	-1.02383	0.049	0.217	1.61411e-83	HCs	ELAVL4
GAS1.3	2.89538e-119	-1.02825	0.055	0.27	7.431e-115	HCs	GAS1
PLP1.4	5.55778e-136	-1.03756	0.03	0.256	1.42641e-131	HCs	PLP1
MYO10.3	1.95542e-156	-1.04611	0.07	0.333	5.01857e-152	HCs	MYO10
NR2F1	9.52357e-192	-1.05138	0.195	0.509	2.44422e-187	HCs	NR2F1
PRSS35.4	2.2055e-129	-1.08998	0.021	0.236	5.6604e-125	HCs	PRSS35
QDPR.4	1.02286e-153	-1.1026	0.126	0.396	2.62518e-149	HCs	QDPR
GAP43.4	4.41265e-09	-1.1112	0.3	0.322	0.000113251	HCs	GAP43
CNN3.2	4.84802e-239	-1.11284	0.205	0.56	1.24424e-234	HCs	CNN3
C1orf61.2	2.04421e-110	-1.12216	0.043	0.24	5.24646e-106	HCs	C1orf61
ID3.4	1.05734e-63	-1.1233	0.196	0.352	2.71366e-59	HCs	ID3
LHX9.1	1.53045e-97	-1.12409	0.042	0.222	3.9279e-93	HCs	LHX9
CXCR4	2.31553e-189	-1.1625	0.112	0.416	5.94281e-185	HCs	CXCR4
SLC2A1.2	3.38613e-253	-1.17581	0.161	0.531	8.6905e-249	HCs	SLC2A1
FBXW7.2	5.87691e-210	-1.1769	0.185	0.512	1.50831e-205	HCs	FBXW7
MIAT.1	3.28152e-220	-1.18021	0.423	0.692	8.42202e-216	HCs	MIAT
PMEPA1.3	2.39564e-206	-1.20689	0.253	0.566	6.14842e-202	HCs	PMEPA1
FXYD1.3	8.58063e-193	-1.21593	0.058	0.359	2.20222e-188	HCs	FXYD1
CDH2.1	0	-1.23601	0.198	0.621	0	HCs	CDH2
FABP7.4	5.72941e-187	-1.25781	0.245	0.545	1.47045e-182	HCs	FABP7
SELENOP.3	5.78334e-212	-1.27287	0.053	0.374	1.4843e-207	HCs	SELENOP
CADM1.2	1.69876e-289	-1.31616	0.172	0.57	4.35986e-285	HCs	CADM1
AL139246.5.2	1.43296e-124	-1.32899	0.059	0.278	3.67769e-120	HCs	AL139246.5
IGFBP2.1	1.12196e-194	-1.34674	0.319	0.606	2.87952e-190	HCs	IGFBP2
DAPL1.2	1.83664e-219	-1.37389	0.156	0.488	4.71375e-215	HCs	DAPL1
TCF4.3	6.44116e-246	-1.39658	0.276	0.611	1.65312e-241	HCs	TCF4
FOS.4	4.45819e-80	-1.40973	0.602	0.699	1.14419e-75	HCs	FOS
HES6.2	6.8176e-122	-1.41904	0.266	0.497	1.74974e-117	HCs	HES6
CKB.4	0	-1.45376	0.959	0.982	0	HCs	CKB
GPM6B.3	0	-1.49367	0.163	0.573	0	HCs	GPM6B
ASCL1.4	1.21081e-220	-1.50955	0.109	0.443	3.10754e-216	HCs	ASCL1
ID1.4	2.04812e-223	-1.53346	0.121	0.454	5.25651e-219	HCs	ID1
HES4.4	8.7063e-273	-1.56502	0.186	0.563	2.23447e-268	HCs	HES4
MEST.2	0	-1.57006	0.199	0.611	0	HCs	MEST
RAX.4	2.96548e-296	-1.57204	0.094	0.495	7.61091e-292	HCs	RAX
SAT1.4	2.96628e-160	-1.58519	0.213	0.484	7.61297e-156	HCs	SAT1
PRPH.4	1.75934e-25	-1.60242	0.097	0.171	4.51536e-21	HCs	PRPH
CLU.3	0	-1.61032	0.275	0.689	0	HCs	CLU
DKK3.3	0	-1.63834	0.202	0.665	0	HCs	DKK3
CYR61.4	1.28733e-197	-1.65517	0.049	0.347	3.30394e-193	HCs	CYR61
SFRP2.4	5.52972e-236	-1.71438	0.119	0.46	1.4192e-231	HCs	SFRP2
TF.4	1.40878e-159	-1.74404	0.054	0.313	3.61564e-155	HCs	TF
LINC00461.2	0	-1.78088	0.064	0.518	0	HCs	LINC00461
TTYH1.4	1.80488e-296	-1.80181	0.142	0.523	4.63222e-292	HCs	TTYH1
ZFP36L1.4	9.14537e-287	-1.84924	0.113	0.495	2.34716e-282	HCs	ZFP36L1
SPP1.3	3.19256e-291	-1.92471	0.252	0.599	8.19372e-287	HCs	SPP1
MEIS2.3	3.91482e-185	-2.02022	0.06	0.355	1.00474e-180	HCs	MEIS2
ZFP36L2.4	0	-2.24519	0.172	0.574	0	HCs	ZFP36L2
SOX2.3	0	-2.30504	0.14	0.59	0	HCs	SOX2
HES1.4	1.21125e-260	-2.31046	0.143	0.5	3.10868e-256	HCs	HES1
HES5.2	1.05301e-194	-2.42829	0.134	0.432	2.70256e-190	HCs	HES5
CCND1.3	0	-2.49273	0.198	0.579	0	HCs	CCND1
VIM.4	0	-2.62418	0.542	0.861	0	HCs	VIM
CRABP1.2	0	-2.63985	0.704	0.984	0	HCs	CRABP1
MEIS2.4	0	3.11994	0.803	0.245	0	ACs	MEIS2
TFAP2A.4	0	2.40249	0.756	0.205	0	ACs	TFAP2A
RND3.3	0	2.19009	0.692	0.285	0	ACs	RND3
LMO4.2	1.20668e-246	2.18697	0.536	0.365	3.09694e-242	ACs	LMO4
PCP4.3	0	2.10417	0.373	0.12	0	ACs	PCP4
RALYL.4	0	1.95193	0.463	0.146	0	ACs	RALYL
LHX9.2	0	1.91595	0.52	0.151	0	ACs	LHX9
CELF4.2	0	1.80692	0.681	0.288	0	ACs	CELF4
MIR181A1HG.2	0	1.7759	0.663	0.208	0	ACs	MIR181A1HG
GAD2.2	0	1.72392	0.538	0.081	0	ACs	GAD2
ZNF385D.2	0	1.61822	0.761	0.405	0	ACs	ZNF385D
NRXN1.2	0	1.57865	0.617	0.213	0	ACs	NRXN1
ZFHX3.2	0	1.5683	0.533	0.231	0	ACs	ZFHX3
ZNF503.1	0	1.53324	0.439	0.114	0	ACs	ZNF503
TFAP2C.1	0	1.45107	0.337	0.07	0	ACs	TFAP2C
ZFHX4.3	0	1.39153	0.463	0.222	0	ACs	ZFHX4
RD3L	0	1.39	0.322	0.022	0	ACs	RD3L
FAT3.1	0	1.38766	0.507	0.203	0	ACs	FAT3
PCDH9.3	0	1.38356	0.532	0.271	0	ACs	PCDH9
SYT1.2	0	1.37309	0.879	0.688	0	ACs	SYT1
BHLHE22.1	0	1.36789	0.398	0.14	0	ACs	BHLHE22
RUNX1T1.3	0	1.35825	0.546	0.257	0	ACs	RUNX1T1
KIF5C.3	0	1.33647	0.679	0.369	0	ACs	KIF5C
PRDM8	0	1.31511	0.24	0.058	0	ACs	PRDM8
MIR124-2HG.2	0	1.3076	0.604	0.26	0	ACs	MIR124-2HG
SCN2A.1	0	1.29921	0.456	0.126	0	ACs	SCN2A
PBX1.2	0	1.29665	0.616	0.417	0	ACs	PBX1
JPH4.1	0	1.29339	0.447	0.125	0	ACs	JPH4
RBFOX2.3	0	1.2878	0.696	0.354	0	ACs	RBFOX2
NTM.3	0	1.24723	0.528	0.234	0	ACs	NTM
RPRM	1.9652e-289	1.24076	0.31	0.107	5.04368e-285	ACs	RPRM
TFAP2B.4	0	1.2277	0.532	0.212	0	ACs	TFAP2B
ANK3.2	0	1.20914	0.548	0.262	0	ACs	ANK3
CADM2.2	0	1.20302	0.595	0.337	0	ACs	CADM2
GRIA2.2	0	1.16253	0.448	0.18	0	ACs	GRIA2
NBEA	0	1.15189	0.566	0.302	0	ACs	NBEA
PCLO	1.34151e-249	1.13686	0.445	0.234	3.44298e-245	ACs	PCLO
CPLX3	0	1.11109	0.312	0.055	0	ACs	CPLX3
PRKCB.1	8.30957e-285	1.10226	0.315	0.113	2.13265e-280	ACs	PRKCB
CSRNP3.1	0	1.09669	0.529	0.277	0	ACs	CSRNP3
AC004158.1	0	1.0877	0.215	0.022	0	ACs	AC004158.1
PDGFRA	0	1.0795	0.188	0.029	0	ACs	PDGFRA
FARP1	9.14771e-228	1.07601	0.46	0.265	2.34776e-223	ACs	FARP1
DLG2	0	1.0588	0.333	0.088	0	ACs	DLG2
GAD1	0	1.05715	0.263	0.016	0	ACs	GAD1
TAC1.1	2.87401e-104	1.05665	0.192	0.087	7.37614e-100	ACs	TAC1
DCX.3	0	1.05459	0.576	0.262	0	ACs	DCX
SNTG1	0	1.04487	0.246	0.03	0	ACs	SNTG1
RASGEF1B	0	1.04394	0.418	0.163	0	ACs	RASGEF1B
NRP1.1	0	1.04176	0.373	0.145	0	ACs	NRP1
RELN	1.01825e-214	1.04113	0.281	0.111	2.61334e-210	ACs	RELN
PAX6.2	0	1.03587	0.951	0.899	0	ACs	PAX6
SEZ6L2.2	0	1.0354	0.559	0.261	0	ACs	SEZ6L2
FEZ1.2	0	1.02945	0.558	0.302	0	ACs	FEZ1
NRXN2.1	0	1.02816	0.396	0.166	0	ACs	NRXN2
C1QL2	0	1.02442	0.14	0.004	0	ACs	C1QL2
SRRM4.2	1.04049e-279	1.02301	0.46	0.226	2.67043e-275	ACs	SRRM4
SCG5.3	0	1.01406	0.632	0.318	0	ACs	SCG5
GRIA4.1	2.01801e-289	1.01037	0.585	0.354	5.17923e-285	ACs	GRIA4
OLFM3	2.2528e-182	1.00743	0.221	0.08	5.7818e-178	ACs	OLFM3
ARHGEF12.1	1.24831e-301	0.994735	0.478	0.234	3.2038e-297	ACs	ARHGEF12
AC024610.2	0	0.994556	0.224	0.011	0	ACs	AC024610.2
LHFPL6	6.3411e-248	0.984355	0.27	0.093	1.62744e-243	ACs	LHFPL6
POU2F2.2	8.80773e-296	0.983954	0.364	0.14	2.2605e-291	ACs	POU2F2
XIST.1	2.31081e-115	0.982706	0.476	0.329	5.93069e-111	ACs	XIST
DCC	0	0.977659	0.265	0.053	0	ACs	DCC
ADGRL3	1.95397e-253	0.972837	0.408	0.193	5.01485e-249	ACs	ADGRL3
PCBP3.1	1.47773e-297	0.972192	0.453	0.215	3.79259e-293	ACs	PCBP3
TTC3.1	0	0.969656	0.867	0.715	0	ACs	TTC3
NSG2.3	2.4004e-199	0.94936	0.448	0.244	6.16063e-195	ACs	NSG2
FGF14	0	0.94903	0.249	0.046	0	ACs	FGF14
NREP.3	0	0.948542	0.849	0.66	0	ACs	NREP
KIDINS220.1	2.70907e-251	0.946623	0.614	0.421	6.95283e-247	ACs	KIDINS220
TAGLN3.3	0	0.931479	0.769	0.51	0	ACs	TAGLN3
CELF5.1	1.33869e-266	0.926958	0.351	0.143	3.43575e-262	ACs	CELF5
AL512380.1.4	0	0.926949	0.357	0.097	0	ACs	AL512380.1
AUTS2	2.61621e-229	0.925299	0.421	0.214	6.71451e-225	ACs	AUTS2
PTPRK	1.08884e-244	0.923011	0.359	0.151	2.79451e-240	ACs	PTPRK
MYT1L.1	7.26172e-285	0.919364	0.34	0.126	1.86372e-280	ACs	MYT1L
SLC32A1	0	0.911673	0.294	0.053	0	ACs	SLC32A1
SOX4.4	0	0.911487	0.998	0.976	0	ACs	SOX4
AP1S2.2	2.85055e-157	0.909317	0.512	0.361	7.31595e-153	ACs	AP1S2
AC027031.2	1.89205e-275	0.904221	0.281	0.09	4.85595e-271	ACs	AC027031.2
PCDH7	1.35702e-107	0.901367	0.328	0.201	3.4828e-103	ACs	PCDH7
GABRA2	2.68547e-305	0.897857	0.201	0.042	6.89227e-301	ACs	GABRA2
TBX3	2.53629e-218	0.894269	0.266	0.094	6.5094e-214	ACs	TBX3
DPYSL2.3	4.05062e-237	0.890315	0.689	0.53	1.03959e-232	ACs	DPYSL2
RBFOX1	5.74688e-260	0.886671	0.277	0.092	1.47494e-255	ACs	RBFOX1
CEP170.1	1.15278e-238	0.885561	0.616	0.429	2.95861e-234	ACs	CEP170
PPFIA2	5.09633e-205	0.883624	0.312	0.136	1.30797e-200	ACs	PPFIA2
SYT6	0	0.880235	0.212	0.017	0	ACs	SYT6
KHDRBS3	1.05492e-122	0.876854	0.316	0.181	2.70745e-118	ACs	KHDRBS3
SV2A.1	4.00528e-220	0.875106	0.376	0.18	1.02795e-215	ACs	SV2A
ELAVL3.2	1.41927e-275	0.865472	0.616	0.361	3.64256e-271	ACs	ELAVL3
CADPS.1	9.75327e-165	0.865371	0.384	0.214	2.50318e-160	ACs	CADPS
PARD3	4.31896e-143	0.85626	0.345	0.19	1.10846e-138	ACs	PARD3
AKAP9	1.47588e-216	0.854008	0.653	0.49	3.78784e-212	ACs	AKAP9
NNAT.1	0	0.851665	0.898	0.817	0	ACs	NNAT
MAP2.1	1.54415e-234	0.851445	0.643	0.469	3.96307e-230	ACs	MAP2
APC.1	4.4083e-181	0.848472	0.431	0.253	1.13139e-176	ACs	APC
CD24.3	0	0.835899	0.827	0.518	0	ACs	CD24
SNAP25.2	4.83023e-170	0.830818	0.443	0.264	1.23968e-165	ACs	SNAP25
RGS8	0	0.830039	0.249	0.053	0	ACs	RGS8
CRABP1.3	1.10706e-240	0.820298	0.968	0.955	2.84126e-236	ACs	CRABP1
CEP126	1.30394e-168	0.820051	0.375	0.203	3.34655e-164	ACs	CEP126
NRXN3.1	4.02968e-221	0.820037	0.34	0.143	1.03422e-216	ACs	NRXN3
SH3BP5.1	2.93558e-232	0.802641	0.378	0.172	7.53418e-228	ACs	SH3BP5
TFAP2E	0	0.801318	0.145	0.008	0	ACs	TFAP2E
RTN1.4	0	0.796316	0.821	0.427	0	ACs	RTN1
VAMP2.1	1.25613e-266	0.795963	0.779	0.679	3.22387e-262	ACs	VAMP2
CPE.2	4.62958e-191	0.79445	0.623	0.447	1.18818e-186	ACs	CPE
PLPPR1	8.74808e-173	0.793798	0.394	0.216	2.24519e-168	ACs	PLPPR1
GAS7	0	0.788754	0.197	0.027	0	ACs	GAS7
CACNA1A	5.63497e-126	0.787375	0.285	0.15	1.44622e-121	ACs	CACNA1A
SLC38A1.1	2.21731e-162	0.779301	0.409	0.24	5.69074e-158	ACs	SLC38A1
LUC7L3	4.40497e-288	0.779116	0.835	0.766	1.13053e-283	ACs	LUC7L3
PCSK1N.3	0	0.777156	0.748	0.443	0	ACs	PCSK1N
PKIA.3	7.61772e-181	0.776595	0.548	0.372	1.95509e-176	ACs	PKIA
GABPB1-AS1	1.25677e-171	0.776135	0.683	0.57	3.22549e-167	ACs	GABPB1-AS1
AC245297.3	5.18428e-244	0.775688	0.259	0.084	1.33055e-239	ACs	AC245297.3
NEGR1	0	0.772724	0.21	0.032	0	ACs	NEGR1
FRMD4A	1.48162e-149	0.771081	0.359	0.198	3.80257e-145	ACs	FRMD4A
PEG3	3.49126e-139	0.767961	0.299	0.153	8.96031e-135	ACs	PEG3
TERF2IP.1	0	0.762536	0.803	0.676	0	ACs	TERF2IP
TUBB2A.4	0	0.757191	0.825	0.539	0	ACs	TUBB2A
FIBCD1	9.22715e-261	0.757159	0.177	0.038	2.36815e-256	ACs	FIBCD1
DPF3	1.82176e-262	0.756951	0.23	0.064	4.67554e-258	ACs	DPF3
ADGRB3	5.17646e-155	0.756889	0.272	0.125	1.32854e-150	ACs	ADGRB3
AL391650.1.3	2.83809e-184	0.755978	0.612	0.439	7.28396e-180	ACs	AL391650.1
KCNC1	6.1611e-283	0.752673	0.235	0.062	1.58125e-278	ACs	KCNC1
CRIM1	3.20931e-118	0.75216	0.222	0.1	8.23669e-114	ACs	CRIM1
THRA	5.42942e-156	0.749631	0.467	0.304	1.39346e-151	ACs	THRA
IGFBP4	1.92891e-121	0.742162	0.24	0.114	4.95056e-117	ACs	IGFBP4
APLP1.3	1.17457e-195	0.740252	0.555	0.338	3.01452e-191	ACs	APLP1
GABRG2	2.40087e-274	0.736108	0.209	0.051	6.16184e-270	ACs	GABRG2
CACNA1D	0	0.732229	0.2	0.03	0	ACs	CACNA1D
CTTNBP2	1.86518e-141	0.730313	0.276	0.131	4.78699e-137	ACs	CTTNBP2
HIP1R	1.57017e-165	0.728414	0.255	0.107	4.02984e-161	ACs	HIP1R
ZBTB38	9.51674e-139	0.726833	0.307	0.159	2.44247e-134	ACs	ZBTB38
SRGAP3	5.71806e-160	0.726746	0.65	0.529	1.46754e-155	ACs	SRGAP3
SYP.1	3.3958e-128	0.724177	0.413	0.263	8.71533e-124	ACs	SYP
NETO2	2.50513e-128	0.722931	0.227	0.102	6.42941e-124	ACs	NETO2
MLLT11.3	2.58107e-276	0.722854	0.794	0.548	6.62432e-272	ACs	MLLT11
CACNB4	5.01103e-230	0.722722	0.228	0.07	1.28608e-225	ACs	CACNB4
SPOCK1	4.76168e-73	0.722621	0.214	0.119	1.22209e-68	ACs	SPOCK1
ATP1A3.2	6.16245e-172	0.721007	0.503	0.311	1.58159e-167	ACs	ATP1A3
CCDC88A.2	5.66904e-184	0.710432	0.745	0.644	1.45496e-179	ACs	CCDC88A
MEIS1	1.93263e-111	0.708808	0.47	0.344	4.9601e-107	ACs	MEIS1
LY6H.3	1.91007e-144	0.706858	0.347	0.184	4.90218e-140	ACs	LY6H
ADAMTS6.1	9.91262e-175	-0.704009	0.011	0.202	2.54407e-170	ACs	ADAMTS6
SSX2IP.3	5.38573e-143	-0.709253	0.047	0.232	1.38225e-138	ACs	SSX2IP
MYL6	0	-0.713787	0.711	0.894	0	ACs	MYL6
MAP1B.3	4.44256e-168	-0.717815	0.713	0.875	1.14018e-163	ACs	MAP1B
B2M.2	1.88416e-186	-0.720112	0.061	0.293	4.8357e-182	ACs	B2M
LMAN1.2	3.97004e-210	-0.725457	0.181	0.47	1.01891e-205	ACs	LMAN1
TPT1	0	-0.726304	0.927	0.987	0	ACs	TPT1
TGIF1.1	6.4006e-194	-0.732191	0.021	0.237	1.64271e-189	ACs	TGIF1
FEZF2.3	6.53776e-188	-0.73222	0.06	0.292	1.67792e-183	ACs	FEZF2
EEF1D.1	3.49988e-253	-0.734111	0.482	0.776	8.98244e-249	ACs	EEF1D
TMSB4X.1	1.15566e-239	-0.735013	0.853	0.952	2.966e-235	ACs	TMSB4X
CA14.3	1.44914e-159	-0.740249	0.046	0.243	3.71921e-155	ACs	CA14
CLGN.1	4.90044e-203	-0.746179	0.042	0.278	1.2577e-198	ACs	CLGN
PRDX6	6.85594e-252	-0.751517	0.153	0.472	1.75958e-247	ACs	PRDX6
SDCBP	7.98098e-271	-0.7537	0.065	0.371	2.04832e-266	ACs	SDCBP
NELL2.1	4.32976e-240	-0.7538	0.09	0.383	1.11123e-235	ACs	NELL2
ODC1.1	6.50414e-230	-0.756376	0.273	0.581	1.66929e-225	ACs	ODC1
KDR.4	2.83232e-165	-0.761534	0.023	0.214	7.26916e-161	ACs	KDR
VSX2.5	9.59132e-188	-0.771673	0.032	0.249	2.46161e-183	ACs	VSX2
RPS6.1	0	-0.772742	0.943	0.995	0	ACs	RPS6
OSTC.1	4.33207e-266	-0.77606	0.179	0.513	1.11182e-261	ACs	OSTC
RPS7	0	-0.778739	0.94	0.992	0	ACs	RPS7
RARRES2.2	1.49466e-193	-0.790203	0.035	0.259	3.83604e-189	ACs	RARRES2
SH3BGRL3.2	4.99221e-172	-0.791393	0.213	0.463	1.28125e-167	ACs	SH3BGRL3
FZD5.2	1.61635e-195	-0.792014	0.034	0.258	4.14836e-191	ACs	FZD5
SLC2A1.3	1.23536e-220	-0.802274	0.24	0.54	3.17056e-216	ACs	SLC2A1
MCAM.3	6.94253e-164	-0.810887	0.011	0.192	1.7818e-159	ACs	MCAM
NRN1.5	3.68738e-93	-0.816065	0.038	0.165	9.46365e-89	ACs	NRN1
NEUROD4.5	1.23898e-50	-0.819368	0.09	0.188	3.17985e-46	ACs	NEUROD4
GSTP1	0	-0.819728	0.412	0.75	0	ACs	GSTP1
CRNDE.2	1.55845e-256	-0.821799	0.036	0.313	3.99977e-252	ACs	CRNDE
NFIB.3	2.89416e-167	-0.823381	0.044	0.247	7.42786e-163	ACs	NFIB
PROX1.2	1.0316e-135	-0.823624	0.126	0.328	2.64761e-131	ACs	PROX1
PRSS23.2	4.43894e-196	-0.824839	0.022	0.24	1.13925e-191	ACs	PRSS23
ANXA5.1	2.05549e-275	-0.83393	0.057	0.36	5.27542e-271	ACs	ANXA5
DNAJB1.2	5.2453e-83	-0.838767	0.257	0.429	1.34621e-78	ACs	DNAJB1
RASD1.1	1.12457e-124	-0.83912	0.052	0.22	2.88622e-120	ACs	RASD1
COL2A1.4	2.36496e-198	-0.84633	0.022	0.242	6.06967e-194	ACs	COL2A1
FABP7.5	2.75972e-138	-0.846751	0.329	0.549	7.08281e-134	ACs	FABP7
NKAIN4	4.25376e-270	-0.851733	0.039	0.329	1.09173e-265	ACs	NKAIN4
METRN.3	1.34728e-173	-0.85475	0.143	0.381	3.45779e-169	ACs	METRN
ZIC2	4.63829e-250	-0.858447	0.142	0.451	1.19042e-245	ACs	ZIC2
ONECUT1.2	7.1831e-129	-0.865947	0.024	0.18	1.84354e-124	ACs	ONECUT1
BTG3.1	3.57845e-282	-0.867883	0.048	0.349	9.1841e-278	ACs	BTG3
BAMBI.3	2.36258e-170	-0.870345	0.094	0.317	6.06357e-166	ACs	BAMBI
RTN4.3	0	-0.875264	0.788	0.936	0	ACs	RTN4
ONECUT2.5	7.0744e-42	-0.88646	0.145	0.238	1.81565e-37	ACs	ONECUT2
TPPP3.1	9.59254e-265	-0.888579	0.028	0.307	2.46193e-260	ACs	TPPP3
LGI4.4	3.01061e-206	-0.890808	0.032	0.263	7.72674e-202	ACs	LGI4
NEFL.5	1.10602e-49	-0.892671	0.132	0.239	2.8386e-45	ACs	NEFL
NEFM.5	3.15723e-56	-0.893476	0.111	0.222	8.10303e-52	ACs	NEFM
STON2.3	9.57521e-266	-0.895767	0.077	0.379	2.45748e-261	ACs	STON2
TAGLN2.2	4.97808e-270	-0.896122	0.041	0.331	1.27762e-265	ACs	TAGLN2
GADD45A.3	5.62002e-150	-0.90426	0.086	0.293	1.44238e-145	ACs	GADD45A
CLIC1.1	0	-0.905156	0.034	0.353	0	ACs	CLIC1
ILDR2.3	7.52742e-228	-0.910576	0.05	0.307	1.93191e-223	ACs	ILDR2
C1orf61.3	1.85548e-108	-0.911475	0.086	0.245	4.76208e-104	ACs	C1orf61
RCN1.2	0	-0.917879	0.163	0.542	0	ACs	RCN1
GNAI2.2	8.15958e-305	-0.931407	0.178	0.527	2.09416e-300	ACs	GNAI2
HSPA1A.2	3.67419e-81	-0.932224	0.55	0.698	9.42982e-77	ACs	HSPA1A
SMIM20.3	3.59386e-277	-0.939152	0.096	0.411	9.22365e-273	ACs	SMIM20
ISL1.4	5.43569e-111	-0.939646	0.028	0.168	1.39507e-106	ACs	ISL1
CREB5.3	1.06863e-233	-0.952209	0.017	0.262	2.74263e-229	ACs	CREB5
DBI	0	-0.953023	0.261	0.627	0	ACs	DBI
LIMCH1.4	3.19545e-243	-0.95935	0.031	0.293	8.20113e-239	ACs	LIMCH1
NOTCH1.3	7.85747e-261	-0.966975	0.031	0.308	2.01662e-256	ACs	NOTCH1
CSRP2.2	4.70704e-302	-0.970138	0.174	0.528	1.20806e-297	ACs	CSRP2
CDKN1C.1	7.24469e-228	-0.983618	0.108	0.391	1.85935e-223	ACs	CDKN1C
GATB.4	2.04446e-228	-0.987515	0.072	0.337	5.24711e-224	ACs	GATB
SRI	0	-0.990977	0.128	0.524	0	ACs	SRI
MYB.4	1.299e-263	-1.01098	0.045	0.328	3.33388e-259	ACs	MYB
TMEM123.4	3.35674e-302	-1.0155	0.045	0.358	8.61507e-298	ACs	TMEM123
QDPR.5	1.32319e-222	-1.02827	0.134	0.411	3.39597e-218	ACs	QDPR
DUSP1.3	8.97665e-202	-1.0352	0.379	0.649	2.30386e-197	ACs	DUSP1
LINC01833.3	0	-1.0388	0.097	0.462	0	ACs	LINC01833
MYO10.4	3.78103e-253	-1.04249	0.066	0.35	9.70402e-249	ACs	MYO10
PLP1.5	8.34442e-221	-1.04348	0.03	0.27	2.14159e-216	ACs	PLP1
CMTM6.2	0	-1.05008	0.069	0.417	0	ACs	CMTM6
TUBA1B.3	2.48544e-263	-1.05225	0.628	0.807	6.37887e-259	ACs	TUBA1B
GPM6B.4	2.38002e-272	-1.07007	0.266	0.581	6.10832e-268	ACs	GPM6B
GAS1.4	3.48868e-204	-1.07107	0.049	0.284	8.95369e-200	ACs	GAS1
PRSS35.5	8.16774e-212	-1.12271	0.021	0.25	2.09625e-207	ACs	PRSS35
NES.3	0	-1.13606	0.044	0.368	0	ACs	NES
DAPL1.3	1.74587e-277	-1.1432	0.183	0.504	4.48079e-273	ACs	DAPL1
FXYD1.4	2.86241e-303	-1.15906	0.058	0.377	7.34637e-299	ACs	FXYD1
JUND.1	0	-1.16637	0.599	0.843	0	ACs	JUND
SOX9.4	7.37547e-270	-1.16699	0.16	0.465	1.89291e-265	ACs	SOX9
HSPB1.1	4.86288e-296	-1.19191	0.127	0.46	1.24806e-291	ACs	HSPB1
ATOH7.2	2.49617e-72	-1.2152	0.016	0.11	6.40642e-68	ACs	ATOH7
MDK.3	0	-1.22498	0.366	0.691	0	ACs	MDK
IER2.2	0	-1.23843	0.261	0.609	0	ACs	IER2
SELENOP.4	0	-1.24881	0.058	0.393	0	ACs	SELENOP
PTF1A.5	6.19709e-115	-1.26978	0.025	0.166	1.59048e-110	ACs	PTF1A
CNN3.3	0	-1.28384	0.137	0.594	0	ACs	CNN3
EGR1.4	2.85485e-206	-1.289	0.079	0.323	7.32698e-202	ACs	EGR1
PMEPA1.4	0	-1.32241	0.214	0.592	0	ACs	PMEPA1
MEST.3	0	-1.35346	0.234	0.63	0	ACs	MEST
CKB.5	0	-1.35489	0.954	0.984	0	ACs	CKB
GNG5.2	0	-1.37182	0.114	0.612	0	ACs	GNG5
BTG2.3	0	-1.37908	0.112	0.445	0	ACs	BTG2
TCF4.4	0	-1.38448	0.188	0.647	0	ACs	TCF4
AL139246.5.3	2.04116e-225	-1.38631	0.045	0.294	5.23865e-221	ACs	AL139246.5
CXCR4.1	0	-1.44087	0.052	0.445	0	ACs	CXCR4
SNCG.5	3.16922e-141	-1.46758	0.089	0.282	8.13381e-137	ACs	SNCG
ID3.5	1.06439e-242	-1.5258	0.099	0.378	2.73176e-238	ACs	ID3
HES6.3	1.57807e-245	-1.55755	0.224	0.519	4.05012e-241	ACs	HES6
RGS16.3	0	-1.57105	0.239	0.559	0	ACs	RGS16
CLU.4	0	-1.64068	0.237	0.721	0	ACs	CLU
RAX.5	0	-1.6444	0.076	0.523	0	ACs	RAX
FOS.5	2.4218e-251	-1.64573	0.489	0.725	6.21556e-247	ACs	FOS
ASCL1.5	0	-1.65929	0.094	0.467	0	ACs	ASCL1
TF.5	3.5606e-230	-1.66703	0.068	0.327	9.13827e-226	ACs	TF
ID1.5	0	-1.67797	0.096	0.479	0	ACs	ID1
CYR61.5	0	-1.71837	0.045	0.366	0	ACs	CYR61
HES4.5	0	-1.74837	0.125	0.597	0	ACs	HES4
SAT1.5	0	-1.75536	0.147	0.512	0	ACs	SAT1
JUN.3	0	-1.80348	0.432	0.84	0	ACs	JUN
TTYH1.5	0	-1.86773	0.117	0.552	0	ACs	TTYH1
PRPH.5	1.40884e-140	-1.87279	0.023	0.188	3.61578e-136	ACs	PRPH
ZFP36L1.5	0	-1.94811	0.093	0.522	0	ACs	ZFP36L1
SFRP2.5	0	-2.01141	0.059	0.491	0	ACs	SFRP2
SPP1.4	0	-2.15164	0.157	0.637	0	ACs	SPP1
ZFP36L2.5	0	-2.50851	0.126	0.607	0	ACs	ZFP36L2
VIM.5	0	-2.51108	0.545	0.88	0	ACs	VIM
CCND1.4	0	-2.57311	0.202	0.602	0	ACs	CCND1
SOX2.4	0	-2.5872	0.1	0.624	0	ACs	SOX2
HES5.3	0	-2.644	0.096	0.457	0	ACs	HES5
HES1.5	0	-2.67933	0.13	0.525	0	ACs	HES1

## Sheet: RPC_T2_HCs_ACs
Pseudotime RPCs, T2, HCs and ACs
	p_val	avg_log2FC	pct.1	pct.2	p_val_adj	cluster	gene
HES1	0	3.19277	0.873	0.176	0	RPCs	HES1
ZFP36L2	0	2.88334	0.952	0.242	0	RPCs	ZFP36L2
VIM	0	2.85421	0.999	0.65	0	RPCs	VIM
CCND1	0	2.84216	0.952	0.265	0	RPCs	CCND1
SFRP2	0	2.49014	0.803	0.144	0	RPCs	SFRP2
SPP1	0	2.48852	0.939	0.278	0	RPCs	SPP1
ZFP36L1	0	2.48399	0.878	0.163	0	RPCs	ZFP36L1
TF	0	2.42442	0.585	0.078	0	RPCs	TF
FOS	0	2.41206	0.875	0.525	0	RPCs	FOS
TTYH1	0	2.40553	0.905	0.188	0	RPCs	TTYH1
CYR61	0	2.37868	0.656	0.068	0	RPCs	CYR61
SOX2	0	2.36722	0.953	0.295	0	RPCs	SOX2
SAT1	0	2.27145	0.642	0.215	0	RPCs	SAT1
ID3	0	2.07418	0.532	0.139	0	RPCs	ID3
ID1	0	1.94911	0.713	0.176	0	RPCs	ID1
HES5	0	1.94872	0.685	0.195	0	RPCs	HES5
HES4	0	1.8888	0.795	0.225	0	RPCs	HES4
PRSS35	0	1.68119	0.464	0.038	0	RPCs	PRSS35
GPM6B	0	1.6623	0.817	0.302	0	RPCs	GPM6B
SOX9	0	1.65867	0.737	0.208	0	RPCs	SOX9
EGR1	0	1.64114	0.48	0.141	0	RPCs	EGR1
PLP1	0	1.60602	0.5	0.043	0	RPCs	PLP1
PMEPA1	0	1.59778	0.802	0.323	0	RPCs	PMEPA1
QDPR	0	1.58586	0.578	0.155	0	RPCs	QDPR
ASCL1	0	1.54692	0.717	0.22	0	RPCs	ASCL1
CLU	0	1.54334	0.896	0.396	0	RPCs	CLU
SELENOP	0	1.53056	0.641	0.139	0	RPCs	SELENOP
JUN	0	1.50804	0.935	0.653	0	RPCs	JUN
GAS1	0	1.43263	0.466	0.099	0	RPCs	GAS1
FXYD1	0	1.42365	0.606	0.133	0	RPCs	FXYD1
RAX	0	1.4195	0.738	0.232	0	RPCs	RAX
LIMCH1	0	1.41051	0.476	0.053	0	RPCs	LIMCH1
MYB	0	1.38381	0.556	0.097	0	RPCs	MYB
GATB	0	1.34806	0.525	0.121	0	RPCs	GATB
COL2A1	0	1.3225	0.443	0.037	0	RPCs	COL2A1
BAMBI	0	1.31353	0.509	0.129	0	RPCs	BAMBI
STON2	0	1.28552	0.542	0.114	0	RPCs	STON2
IER2	0	1.28071	0.717	0.401	0	RPCs	IER2
MYO10	0	1.26669	0.55	0.154	0	RPCs	MYO10
CKB	0	1.26137	0.999	0.959	0	RPCs	CKB
MEST	0	1.2498	0.806	0.36	0	RPCs	MEST
SLC1A3	0	1.23396	0.438	0.078	0	RPCs	SLC1A3
LINC01833	0	1.23074	0.604	0.199	0	RPCs	LINC01833
KDR	0	1.20632	0.39	0.039	0	RPCs	KDR
JUNB	0	1.20369	0.505	0.285	0	RPCs	JUNB
METRN	0	1.20202	0.547	0.208	0	RPCs	METRN
FOSB	0	1.19505	0.429	0.113	0	RPCs	FOSB
MCAM	0	1.18949	0.341	0.038	0	RPCs	MCAM
DAPL1	0	1.1721	0.685	0.288	0	RPCs	DAPL1
DUSP1	0	1.15296	0.729	0.488	0	RPCs	DUSP1
CNN3	0	1.15042	0.724	0.326	0	RPCs	CNN3
TUBA1B	0	1.14893	0.844	0.668	0	RPCs	TUBA1B
DDHD1	0	1.14248	0.541	0.213	0	RPCs	DDHD1
AC009041.2	0	1.13894	0.362	0.054	0	RPCs	AC009041.2
FZD5	0	1.12808	0.432	0.077	0	RPCs	FZD5
CMTM6	0	1.128	0.579	0.207	0	RPCs	CMTM6
BTG2	0	1.11705	0.528	0.282	0	RPCs	BTG2
CA14	0	1.11635	0.407	0.074	0	RPCs	CA14
WIF1	0	1.11297	0.212	0.021	0	RPCs	WIF1
GNAI2	0	1.10617	0.654	0.281	0	RPCs	GNAI2
ADAMTS6	0	1.08852	0.353	0.032	0	RPCs	ADAMTS6
RTN4	0	1.07304	0.98	0.84	0	RPCs	RTN4
TRPM3	0	1.0641	0.411	0.095	0	RPCs	TRPM3
FAM69C	0	1.06258	0.36	0.037	0	RPCs	FAM69C
AL139246.5	0	1.05091	0.47	0.117	0	RPCs	AL139246.5
PRSS23	0	1.04373	0.378	0.084	0	RPCs	PRSS23
JUND	0	1.04045	0.879	0.729	0	RPCs	JUND
RLBP1	0	1.0363	0.278	0.02	0	RPCs	RLBP1
LGI4	0	1.02789	0.413	0.094	0	RPCs	LGI4
TMEM37	0	1.02482	0.331	0.033	0	RPCs	TMEM37
REST	0	1.0234	0.425	0.091	0	RPCs	REST
ID4	0	1.01615	0.597	0.2	0	RPCs	ID4
ETV5	0	1.00994	0.335	0.042	0	RPCs	ETV5
CRNDE	0	1.00435	0.411	0.086	0	RPCs	CRNDE
TBX2-AS1	0	0.99439	0.466	0.127	0	RPCs	TBX2-AS1
DKK3	0	0.993289	0.812	0.404	0	RPCs	DKK3
SPRY2	0	0.991875	0.445	0.134	0	RPCs	SPRY2
LINC00461	0	0.985389	0.693	0.361	0	RPCs	LINC00461
B2M	0	0.981953	0.457	0.115	0	RPCs	B2M
LUM	0	0.975034	0.222	0.021	0	RPCs	LUM
NOTCH1	0	0.974164	0.468	0.146	0	RPCs	NOTCH1
RARRES2	0	0.971009	0.412	0.098	0	RPCs	RARRES2
LHX2	0	0.963169	0.523	0.183	0	RPCs	LHX2
SMIM20	0	0.96263	0.54	0.206	0	RPCs	SMIM20
ILDR2	0	0.96045	0.467	0.146	0	RPCs	ILDR2
MOB3B	0	0.959564	0.333	0.044	0	RPCs	MOB3B
CLIC1	0	0.952052	0.437	0.117	0	RPCs	CLIC1
TAGLN2	0	0.930655	0.435	0.121	0	RPCs	TAGLN2
CCDC34	0	0.929237	0.508	0.201	0	RPCs	CCDC34
PYGL	0	0.919003	0.3	0.036	0	RPCs	PYGL
CRYM	0	0.907208	0.275	0.028	0	RPCs	CRYM
IFITM3	0	0.904808	0.303	0.026	0	RPCs	IFITM3
CXCR4	0	0.90244	0.53	0.217	0	RPCs	CXCR4
SOX8	0	0.899098	0.258	0.033	0	RPCs	SOX8
CADM1	0	0.899026	0.668	0.342	0	RPCs	CADM1
DBI	0	0.891557	0.688	0.394	0	RPCs	DBI
GLI3	0	0.889811	0.292	0.032	0	RPCs	GLI3
C1orf61	8.74763e-303	0.88406	0.359	0.147	2.24508e-298	RPCs	C1orf61
RNF180	0	0.883833	0.367	0.102	0	RPCs	RNF180
LGR4	0	0.880681	0.625	0.313	0	RPCs	LGR4
NR4A1	0	0.878714	0.235	0.043	0	RPCs	NR4A1
SLC2A1	0	0.875426	0.663	0.342	0	RPCs	SLC2A1
CRB1	0	0.874255	0.472	0.171	0	RPCs	CRB1
NR2E1	0	0.870215	0.292	0.032	0	RPCs	NR2E1
NES	0	0.868523	0.502	0.222	0	RPCs	NES
RCN1	0	0.862581	0.612	0.3	0	RPCs	RCN1
COL4A2	0	0.861944	0.315	0.047	0	RPCs	COL4A2
TOX3	0	0.854501	0.537	0.263	0	RPCs	TOX3
DKK1	0	0.85263	0.208	0.024	0	RPCs	DKK1
MUM1	0	0.850569	0.718	0.44	0	RPCs	MUM1
FABP7	0	0.84718	0.709	0.369	0	RPCs	FABP7
CLGN	0	0.843772	0.379	0.114	0	RPCs	CLGN
DEK	0	0.839872	0.736	0.486	0	RPCs	DEK
TCF7L2	0	0.835552	0.364	0.103	0	RPCs	TCF7L2
TGIF1	0	0.83182	0.358	0.099	0	RPCs	TGIF1
MDK	0	0.826629	0.763	0.542	0	RPCs	MDK
TMEM98	0	0.820757	0.566	0.281	0	RPCs	TMEM98
OSTC	0	0.817195	0.595	0.305	0	RPCs	OSTC
PLEKHB1	0	0.814633	0.293	0.043	0	RPCs	PLEKHB1
EEF1D	0	0.812828	0.833	0.614	0	RPCs	EEF1D
VSX2	0	0.812698	0.397	0.098	0	RPCs	VSX2
FILIP1	0	0.81139	0.272	0.044	0	RPCs	FILIP1
TMEM123	0	0.798814	0.503	0.192	0	RPCs	TMEM123
ISYNA1	0	0.797475	0.447	0.197	0	RPCs	ISYNA1
ARHGEF26	0	0.797231	0.358	0.102	0	RPCs	ARHGEF26
CTGF	0	0.795295	0.177	0.014	0	RPCs	CTGF
RDH10	0	0.790321	0.249	0.038	0	RPCs	RDH10
ST5	0	0.78739	0.365	0.134	0	RPCs	ST5
CREB5	0	0.786017	0.385	0.129	0	RPCs	CREB5
TPPP3	0	0.784668	0.367	0.132	0	RPCs	TPPP3
BCHE	0	0.780894	0.371	0.111	0	RPCs	BCHE
CDH2	0	0.775879	0.721	0.414	0	RPCs	CDH2
PLEKHA1	0	0.771729	0.548	0.284	0	RPCs	PLEKHA1
PRDX6	0	0.771076	0.518	0.269	0	RPCs	PRDX6
FAM184B	0	0.769125	0.372	0.135	0	RPCs	FAM184B
SORCS1	0	0.764155	0.3	0.069	0	RPCs	SORCS1
TIMP1	0	0.755494	0.32	0.067	0	RPCs	TIMP1
EML1	0	0.749891	0.375	0.131	0	RPCs	EML1
ADGRL2	0	0.742403	0.282	0.058	0	RPCs	ADGRL2
SPON1	0	0.739779	0.273	0.059	0	RPCs	SPON1
EPHX2	0	0.736854	0.278	0.058	0	RPCs	EPHX2
RHEB	0	0.734643	0.635	0.392	0	RPCs	RHEB
SNRPG	0	0.732618	0.847	0.656	0	RPCs	SNRPG
FOXP2	0	0.732159	0.248	0.045	0	RPCs	FOXP2
KIAA1147	0	0.73206	0.342	0.123	0	RPCs	KIAA1147
RPS6	0	0.730168	0.998	0.977	0	RPCs	RPS6
BTG1	0	0.724277	0.969	0.908	0	RPCs	BTG1
CDCA7L	0	0.723463	0.323	0.086	0	RPCs	CDCA7L
ANGPTL1	0	0.723154	0.22	0.023	0	RPCs	ANGPTL1
CALD1	0	0.722597	0.524	0.264	0	RPCs	CALD1
CSPG5	0	0.706902	0.338	0.128	0	RPCs	CSPG5
CDK6	0	0.70625	0.332	0.091	0	RPCs	CDK6
PTPRZ1	0	0.705764	0.581	0.317	0	RPCs	PTPRZ1
LMAN1	0	0.704122	0.56	0.305	0	RPCs	LMAN1
DIO3	0	0.704051	0.191	0.011	0	RPCs	DIO3
NFIB	8.57071e-275	0.700755	0.34	0.138	2.19967e-270	RPCs	NFIB
MTSS1	0	-0.704286	0.065	0.253	0	RPCs	MTSS1
2006-09-01	0	-0.70857	0.218	0.445	0	RPCs	2006-09-01
RPAIN	0	-0.709576	0.414	0.629	0	RPCs	RPAIN
ONECUT3	0	-0.714861	0.003	0.161	0	RPCs	ONECUT3
AUTS2	4.79289e-251	-0.715375	0.133	0.318	1.23009e-246	RPCs	AUTS2
MAP1LC3A	0	-0.71746	0.091	0.305	0	RPCs	MAP1LC3A
THSD7A	2.73587e-237	-0.722611	0.121	0.297	7.02161e-233	RPCs	THSD7A
VEGFA	2.20474e-155	-0.722684	0.221	0.37	5.65847e-151	RPCs	VEGFA
TUBA1A	0	-0.723412	0.986	0.994	0	RPCs	TUBA1A
DLG2	0	-0.724363	0.024	0.186	0	RPCs	DLG2
DYNC1H1	1.30409e-305	-0.725561	0.317	0.531	3.34694e-301	RPCs	DYNC1H1
VASH2	0	-0.727997	0.062	0.268	0	RPCs	VASH2
PROX1	7.26761e-108	-0.729166	0.256	0.376	1.86523e-103	RPCs	PROX1
PRDM8	6.96972e-200	-0.729503	0.016	0.118	1.78878e-195	RPCs	PRDM8
KIF1A	0	-0.729555	0.141	0.371	0	RPCs	KIF1A
CD200	0	-0.730571	0.059	0.27	0	RPCs	CD200
FAM107B	1.25462e-266	-0.732855	0.115	0.3	3.21997e-262	RPCs	FAM107B
GDAP1L1	0	-0.734739	0.035	0.245	0	RPCs	GDAP1L1
CFL1	0	-0.738964	0.861	0.933	0	RPCs	CFL1
ARL4C	9.75002e-216	-0.739383	0.217	0.392	2.50234e-211	RPCs	ARL4C
TBX3	4.33029e-273	-0.745809	0.042	0.194	1.11137e-268	RPCs	TBX3
RASGEF1B	3.02599e-282	-0.746732	0.101	0.289	7.7662e-278	RPCs	RASGEF1B
L1CAM	0	-0.749886	0.019	0.215	0	RPCs	L1CAM
KDM6B	0	-0.755819	0.116	0.339	0	RPCs	KDM6B
STXBP1	0	-0.756883	0.084	0.312	0	RPCs	STXBP1
DTD1	0	-0.759164	0.225	0.462	0	RPCs	DTD1
CHGB	0	-0.76278	0.03	0.238	0	RPCs	CHGB
CADM2	2.13517e-215	-0.768241	0.235	0.413	5.4799e-211	RPCs	CADM2
SLC25A6	0	-0.768399	0.766	0.883	0	RPCs	SLC25A6
ADD2	0	-0.772492	0.039	0.261	0	RPCs	ADD2
CELF5	0	-0.779838	0.025	0.218	0	RPCs	CELF5
HIF1A	1.17989e-193	-0.780591	0.4	0.547	3.02818e-189	RPCs	HIF1A
SV2A	0	-0.782879	0.053	0.256	0	RPCs	SV2A
DPYSL2	9.7117e-269	-0.783162	0.407	0.593	2.49251e-264	RPCs	DPYSL2
MIF	4.68328e-248	-0.784019	0.607	0.726	1.20196e-243	RPCs	MIF
CABP1	0	-0.789416	0.02	0.224	0	RPCs	CABP1
SCRT2	0	-0.79299	0.014	0.218	0	RPCs	SCRT2
NHLH2	0	-0.796907	0.014	0.208	0	RPCs	NHLH2
LINGO1	0	-0.799405	0.042	0.254	0	RPCs	LINGO1
POU2F2	0	-0.801646	0.016	0.185	0	RPCs	POU2F2
ST18	0	-0.804396	0.009	0.209	0	RPCs	ST18
CPLX3	2.61688e-263	-0.818656	0.03	0.17	6.71623e-259	RPCs	CPLX3
RNF165	0	-0.818727	0.275	0.527	0	RPCs	RNF165
NRXN2	0	-0.82192	0.055	0.263	0	RPCs	NRXN2
STMN1	0	-0.823731	0.979	0.99	0	RPCs	STMN1
SH3BP5	0	-0.824672	0.033	0.249	0	RPCs	SH3BP5
ATCAY	0	-0.828082	0.03	0.261	0	RPCs	ATCAY
DUSP26	0	-0.828891	0.095	0.333	0	RPCs	DUSP26
ZNF385A	0	-0.829703	0.313	0.571	0	RPCs	ZNF385A
PPP1R14B	0	-0.831354	0.359	0.584	0	RPCs	PPP1R14B
MAP2	0	-0.831691	0.313	0.566	0	RPCs	MAP2
PRKCB	0	-0.840436	0.015	0.196	0	RPCs	PRKCB
FAM162A	1.74111e-173	-0.842367	0.256	0.403	4.46856e-169	RPCs	FAM162A
CSRNP3	0	-0.848394	0.158	0.376	0	RPCs	CSRNP3
IGLON5	0	-0.850343	0.069	0.318	0	RPCs	IGLON5
CAMK2N1	3.96604e-301	-0.85059	0.362	0.561	1.01789e-296	RPCs	CAMK2N1
DPYSL3	0	-0.855058	0.045	0.296	0	RPCs	DPYSL3
TTC9B	0	-0.856012	0.032	0.265	0	RPCs	TTC9B
NTM	3.09358e-216	-0.859715	0.128	0.289	7.93968e-212	RPCs	NTM
UCHL1	0	-0.862022	0.311	0.546	0	RPCs	UCHL1
MYT1L	0	-0.86203	0.015	0.224	0	RPCs	MYT1L
CCDC88A	0	-0.867427	0.526	0.74	0	RPCs	CCDC88A
NRP1	0	-0.868037	0.041	0.218	0	RPCs	NRP1
ARHGEF12	0	-0.872154	0.121	0.354	0	RPCs	ARHGEF12
INSM1	0	-0.873615	0.087	0.305	0	RPCs	INSM1
SPATS2L	0	-0.875861	0.044	0.217	0	RPCs	SPATS2L
KIDINS220	0	-0.884733	0.267	0.517	0	RPCs	KIDINS220
PKIA	0	-0.88967	0.209	0.452	0	RPCs	PKIA
SLC38A1	0	-0.893989	0.072	0.315	0	RPCs	SLC38A1
DPYSL4	0	-0.894026	0.164	0.439	0	RPCs	DPYSL4
FEZ1	0	-0.90039	0.163	0.403	0	RPCs	FEZ1
AP1S2	2.79787e-282	-0.900674	0.226	0.425	7.18073e-278	RPCs	AP1S2
LHX1	3.22e-257	-0.904891	0.008	0.122	8.26413e-253	RPCs	LHX1
CCNI	0	-0.909942	0.855	0.937	0	RPCs	CCNI
PGK1	0	-0.91124	0.576	0.733	0	RPCs	PGK1
FAM131C	1.07601e-278	-0.918309	0.042	0.199	2.76159e-274	RPCs	FAM131C
CELF3	0	-0.918561	0.027	0.299	0	RPCs	CELF3
SBK1	0	-0.920096	0.097	0.367	0	RPCs	SBK1
SYT1	0	-0.923444	0.618	0.75	0	RPCs	SYT1
ZFHX4	1.3774e-192	-0.927302	0.119	0.265	3.53511e-188	RPCs	ZFHX4
SOX11	6.85203e-258	-0.928156	0.591	0.698	1.75857e-253	RPCs	SOX11
DNM1	0	-0.929588	0.046	0.281	0	RPCs	DNM1
JPH4	0	-0.939004	0.011	0.231	0	RPCs	JPH4
ZNF503	0	-0.939335	0.038	0.203	0	RPCs	ZNF503
OTX2	6.63607e-74	-0.946551	0.123	0.204	1.70315e-69	RPCs	OTX2
PAX6	0	-0.949732	0.875	0.924	0	RPCs	PAX6
CPE	0	-0.959395	0.266	0.554	0	RPCs	CPE
ATP6V0B	0	-0.965336	0.369	0.653	0	RPCs	ATP6V0B
CACNG3	0	-0.968532	0.008	0.197	0	RPCs	CACNG3
NNAT	0	-0.972187	0.726	0.91	0	RPCs	NNAT
NRXN3	0	-0.974593	0.041	0.306	0	RPCs	NRXN3
SNAP25	0	-0.976809	0.08	0.353	0	RPCs	SNAP25
PLXNA2	0	-0.994058	0.014	0.275	0	RPCs	PLXNA2
PPP1R1A	0	-0.995389	0.043	0.301	0	RPCs	PPP1R1A
NEUROD1	3.68894e-213	-1.00124	0.132	0.296	9.46766e-209	RPCs	NEUROD1
SYP	0	-1.00197	0.086	0.382	0	RPCs	SYP
C4orf48	0	-1.00216	0.293	0.578	0	RPCs	C4orf48
PTMS	0	-1.00521	0.747	0.905	0	RPCs	PTMS
SRRM4	0	-1.00929	0.096	0.367	0	RPCs	SRRM4
SCN2A	0	-1.01167	0.012	0.241	0	RPCs	SCN2A
BARHL2	0	-1.01425	0.014	0.269	0	RPCs	BARHL2
GADD45G	9.46054e-255	-1.01852	0.196	0.394	2.42805e-250	RPCs	GADD45G
TERF2IP	0	-1.02766	0.528	0.798	0	RPCs	TERF2IP
CCNG2	0	-1.03075	0.16	0.449	0	RPCs	CCNG2
RAB3A	0	-1.03129	0.055	0.347	0	RPCs	RAB3A
BNIP3	0	-1.03183	0.512	0.695	0	RPCs	BNIP3
MARCKSL1	0	-1.04188	0.916	0.973	0	RPCs	MARCKSL1
ENO2	0	-1.05755	0.16	0.475	0	RPCs	ENO2
GADD45A	1.30532e-231	-1.06155	0.162	0.333	3.35011e-227	RPCs	GADD45A
EVL	0	-1.06706	0.251	0.56	0	RPCs	EVL
TTC3	0	-1.07153	0.593	0.824	0	RPCs	TTC3
C1QL1	0	-1.07376	0.029	0.206	0	RPCs	C1QL1
ANK3	0	-1.08094	0.111	0.363	0	RPCs	ANK3
GAD2	0	-1.08609	0.054	0.265	0	RPCs	GAD2
CEP170	0	-1.08956	0.241	0.559	0	RPCs	CEP170
CADPS	0	-1.08984	0.057	0.346	0	RPCs	CADPS
AL391650.1	0	-1.09058	0.263	0.585	0	RPCs	AL391650.1
BZW2	0	-1.09121	0.187	0.514	0	RPCs	BZW2
PCBP3	0	-1.10478	0.052	0.368	0	RPCs	PCBP3
PODXL2	0	-1.11665	0.142	0.477	0	RPCs	PODXL2
RALYL	1.15776e-203	-1.13571	0.061	0.192	2.97139e-199	RPCs	RALYL
PCBP4	0	-1.1374	0.225	0.503	0	RPCs	PCBP4
TFAP2C	0	-1.13957	0.015	0.227	0	RPCs	TFAP2C
GNG3	0	-1.14173	0.062	0.375	0	RPCs	GNG3
LINC00599	0	-1.15166	0.064	0.405	0	RPCs	LINC00599
GPC2	0	-1.15778	0.092	0.46	0	RPCs	GPC2
LHX9	1.46927e-142	-1.16442	0.165	0.283	3.77089e-138	RPCs	LHX9
FAM57B	0	-1.17705	0.076	0.424	0	RPCs	FAM57B
GRIA2	0	-1.1935	0.015	0.323	0	RPCs	GRIA2
ZNF385D	0	-1.2007	0.318	0.586	0	RPCs	ZNF385D
MAPT	0	-1.20691	0.042	0.363	0	RPCs	MAPT
PCDH9	2.09453e-304	-1.22761	0.165	0.367	5.37561e-300	RPCs	PCDH9
PRDM13	0	-1.23138	0.011	0.266	0	RPCs	PRDM13
CXXC5	0	-1.2663	0.465	0.718	0	RPCs	CXXC5
DCX	0	-1.26649	0.065	0.386	0	RPCs	DCX
TUBB2B	0	-1.28076	0.92	0.975	0	RPCs	TUBB2B
RBFOX2	0	-1.29749	0.156	0.511	0	RPCs	RBFOX2
TUBB2A	0	-1.30789	0.381	0.658	0	RPCs	TUBB2A
ATP1A3	0	-1.31295	0.064	0.467	0	RPCs	ATP1A3
NRXN1	0	-1.32395	0.057	0.342	0	RPCs	NRXN1
ZFHX3	0	-1.32474	0.092	0.339	0	RPCs	ZFHX3
SCG5	0	-1.32604	0.113	0.457	0	RPCs	SCG5
SCG3	0	-1.33411	0.13	0.556	0	RPCs	SCG3
CNTNAP2	0	-1.34275	0.026	0.231	0	RPCs	CNTNAP2
KIF5C	0	-1.36527	0.183	0.506	0	RPCs	KIF5C
AL512380.1	0	-1.37212	0.02	0.23	0	RPCs	AL512380.1
NSG1	0	-1.38457	0.1	0.458	0	RPCs	NSG1
APLP1	0	-1.39381	0.095	0.496	0	RPCs	APLP1
SEZ6L2	0	-1.40842	0.036	0.438	0	RPCs	SEZ6L2
TMSB10	0	-1.44202	0.957	0.988	0	RPCs	TMSB10
MIR124-2HG	0	-1.44944	0.08	0.479	0	RPCs	MIR124-2HG
CRMP1	0	-1.48193	0.275	0.711	0	RPCs	CRMP1
MIR181A1HG	0	-1.49813	0.095	0.419	0	RPCs	MIR181A1HG
RND3	0	-1.50448	0.192	0.41	0	RPCs	RND3
PCP4	4.59473e-219	-1.51393	0.074	0.221	1.17924e-214	RPCs	PCP4
ONECUT1	0	-1.51865	0.01	0.275	0	RPCs	ONECUT1
PCSK1N	0	-1.53815	0.213	0.623	0	RPCs	PCSK1N
ELAVL3	0	-1.54039	0.092	0.555	0	RPCs	ELAVL3
BASP1	0	-1.54224	0.63	0.902	0	RPCs	BASP1
ATOH7	7.21837e-153	-1.55609	0.033	0.128	1.85259e-148	RPCs	ATOH7
NEUROD4	0	-1.56889	0.073	0.31	0	RPCs	NEUROD4
JPT1	0	-1.57331	0.413	0.792	0	RPCs	JPT1
NREP	0	-1.58086	0.464	0.831	0	RPCs	NREP
NSG2	0	-1.58588	0.043	0.42	0	RPCs	NSG2
INA	0	-1.60448	0.096	0.552	0	RPCs	INA
RUNX1T1	0	-1.82814	0.028	0.473	0	RPCs	RUNX1T1
SOX4	0	-1.84759	0.963	0.995	0	RPCs	SOX4
STMN4	0	-1.87543	0.135	0.558	0	RPCs	STMN4
TAGLN3	0	-1.88933	0.233	0.746	0	RPCs	TAGLN3
LMO4	0	-1.91972	0.246	0.475	0	RPCs	LMO4
MLLT11	0	-2.01725	0.28	0.772	0	RPCs	MLLT11
CELF4	0	-2.01969	0.052	0.533	0	RPCs	CELF4
PTF1A	0	-2.0437	0.015	0.31	0	RPCs	PTF1A
MEIS2	3.27425e-246	-2.1543	0.238	0.388	8.40335e-242	RPCs	MEIS2
RTN1	0	-2.17854	0.165	0.651	0	RPCs	RTN1
ONECUT2	0	-2.20086	0.023	0.392	0	RPCs	ONECUT2
TFAP2B	0	-2.30444	0.045	0.53	0	RPCs	TFAP2B
CD24	0	-2.36343	0.221	0.781	0	RPCs	CD24
TFAP2A	0	-2.49058	0.069	0.555	0	RPCs	TFAP2A
STMN2	0	-3.32126	0.408	0.89	0	RPCs	STMN2
PTF1A.1	0	2.45799	0.7	0.07	0	T2	PTF1A
NEUROD4.1	0	1.87646	0.516	0.136	0	T2	NEUROD4
PRDM13.1	0	1.87302	0.602	0.059	0	T2	PRDM13
IGFBP2	0	1.67887	0.798	0.508	0	T2	IGFBP2
FAM162A.1	0	1.6373	0.683	0.269	0	T2	FAM162A
SPATS2L.1	0	1.60315	0.489	0.069	0	T2	SPATS2L
SOX11.1	0	1.5484	0.904	0.6	0	T2	SOX11
HIF1A.1	0	1.51504	0.794	0.418	0	T2	HIF1A
ACKR3	0	1.48899	0.433	0.048	0	T2	ACKR3
BNIP3.1	0	1.48659	0.876	0.557	0	T2	BNIP3
RBP1	0	1.30548	0.961	0.834	0	T2	RBP1
CCK	3.1971e-203	1.29884	0.113	0.015	8.20534e-199	T2	CCK
GAL	0	1.27972	0.117	0.005	0	T2	GAL
ST18.1	0	1.24629	0.433	0.054	0	T2	ST18
PGK1.1	0	1.2235	0.883	0.616	0	T2	PGK1
CD9	0	1.20873	0.229	0.042	0	T2	CD9
PTMS.1	0	1.17627	0.959	0.803	0	T2	PTMS
ENO1	0	1.16781	0.97	0.893	0	T2	ENO1
MIF.1	0	1.11305	0.832	0.639	0	T2	MIF
THBS3	0	1.10087	0.356	0.035	0	T2	THBS3
GATM	0	1.09951	0.31	0.041	0	T2	GATM
STMN2.1	0	1.09414	0.937	0.601	0	T2	STMN2
CD24.1	0	1.03277	0.829	0.446	0	T2	CD24
PPP1R14A	0	1.02646	0.275	0.025	0	T2	PPP1R14A
TPI1	0	1.02341	0.964	0.841	0	T2	TPI1
GADD45A.1	2.92165e-229	1.02165	0.459	0.212	7.49842e-225	T2	GADD45A
DNM1.1	0	1.01761	0.411	0.121	0	T2	DNM1
CCNG2.1	0	1.01308	0.581	0.257	0	T2	CCNG2
KIRREL2	0	1.01192	0.294	0.018	0	T2	KIRREL2
CXXC5.1	0	0.990743	0.856	0.547	0	T2	CXXC5
MLLT11.1	0	0.989906	0.833	0.475	0	T2	MLLT11
STC2	0	0.967262	0.301	0.04	0	T2	STC2
PARP1	3.18499e-259	0.952725	0.693	0.447	8.17428e-255	T2	PARP1
VEGFA.1	9.38636e-206	0.9505	0.505	0.26	2.40901e-201	T2	VEGFA
PPP1R14B.1	0	0.927452	0.715	0.43	0	T2	PPP1R14B
NHLH2.1	0	0.917653	0.326	0.074	0	T2	NHLH2
SETBP1	0	0.904759	0.39	0.103	0	T2	SETBP1
SLC16A3	0	0.897043	0.355	0.099	0	T2	SLC16A3
LINC00599.1	0	0.895185	0.52	0.186	0	T2	LINC00599
APLP1.1	0	0.877599	0.605	0.243	0	T2	APLP1
PDLIM4	2.28232e-186	0.877093	0.448	0.232	5.85758e-182	T2	PDLIM4
LIMD2	1.34737e-267	0.874149	0.45	0.19	3.45803e-263	T2	LIMD2
TMSB4X	2.28985e-127	0.870899	0.953	0.927	5.8769e-123	T2	TMSB4X
NREP.1	0	0.86439	0.897	0.606	0	T2	NREP
TNNI1	0	0.86355	0.144	0.008	0	T2	TNNI1
CDKN1C	9.73991e-32	0.861005	0.357	0.279	2.49975e-27	T2	CDKN1C
TMSB10.1	0	0.856778	0.995	0.969	0	T2	TMSB10
LOXL1	4.15176e-259	0.855487	0.31	0.098	1.06555e-254	T2	LOXL1
RUNX1T1.1	0	0.847153	0.542	0.202	0	T2	RUNX1T1
GAPDH	0	0.83687	0.999	0.989	0	T2	GAPDH
NDUFA4L2	1.98267e-193	0.831504	0.129	0.022	5.08852e-189	T2	NDUFA4L2
RNF165.1	1.39299e-246	0.821679	0.641	0.361	3.5751e-242	T2	RNF165
LDHA	0	0.819345	0.93	0.805	0	T2	LDHA
SPON2	0	0.815191	0.222	0.018	0	T2	SPON2
CABP1.1	0	0.809363	0.337	0.086	0	T2	CABP1
SOX4.1	0	0.808684	0.993	0.977	0	T2	SOX4
GPC2.1	0	0.804721	0.554	0.229	0	T2	GPC2
CYB5A	4.1895e-258	0.802741	0.279	0.081	1.07523e-253	T2	CYB5A
SLCO5A1	2.63547e-307	0.79	0.391	0.129	6.76394e-303	T2	SLCO5A1
PCBP4.1	7.61201e-259	0.789991	0.61	0.322	1.95362e-254	T2	PCBP4
ONECUT2.1	7.81082e-188	0.785321	0.408	0.174	2.00465e-183	T2	ONECUT2
DDIT4	5.39338e-152	0.782811	0.771	0.606	1.38421e-147	T2	DDIT4
PHC2	1.0712e-238	0.781927	0.564	0.297	2.74923e-234	T2	PHC2
FNDC5	0	0.773064	0.326	0.089	0	T2	FNDC5
PFKFB3	0	0.766145	0.365	0.104	0	T2	PFKFB3
ORAI2	4.66958e-262	0.762802	0.354	0.121	1.19845e-257	T2	ORAI2
BASP1.1	3.45497e-295	0.759294	0.915	0.742	8.86719e-291	T2	BASP1
SH3BGRL3	1.30581e-123	0.753179	0.521	0.344	3.35136e-119	T2	SH3BGRL3
DUSP26.1	2.77709e-245	0.751321	0.433	0.177	7.12739e-241	T2	DUSP26
KDM6B.1	6.85691e-241	0.751077	0.448	0.19	1.75983e-236	T2	KDM6B
MARCKSL1.1	0	0.750088	0.99	0.937	0	T2	MARCKSL1
PLXNA2.1	4.84526e-302	0.74547	0.36	0.108	1.24354e-297	T2	PLXNA2
PFKP	9.42414e-286	0.744197	0.257	0.061	2.41871e-281	T2	PFKP
NOVA2	6.83599e-285	0.741341	0.353	0.111	1.75446e-280	T2	NOVA2
RCOR2	7.91319e-224	0.739404	0.433	0.189	2.03092e-219	T2	RCOR2
ELAVL3.1	6.69848e-283	0.735656	0.605	0.276	1.71916e-278	T2	ELAVL3
MSRB1	2.82122e-306	0.73426	0.234	0.048	7.24067e-302	T2	MSRB1
SSR4	8.92296e-238	0.73212	0.761	0.543	2.29008e-233	T2	SSR4
PPP1R14C	0	0.726198	0.189	0.029	0	T2	PPP1R14C
NHLH1	0	0.717358	0.202	0.018	0	T2	NHLH1
AL391650.1.1	4.03656e-205	0.714136	0.66	0.385	1.03598e-200	T2	AL391650.1
CCDC88A.1	7.9641e-207	0.713928	0.809	0.603	2.04399e-202	T2	CCDC88A
CCDC85B	9.13876e-219	0.707466	0.438	0.197	2.34546e-214	T2	CCDC85B
ARRB2	1.49123e-254	0.705595	0.296	0.09	3.82725e-250	T2	ARRB2
OTX2.1	4.20402e-23	-0.70183	0.111	0.174	1.07896e-18	T2	OTX2
SMAD2	3.24863e-110	-0.703149	0.2	0.393	8.3376e-106	T2	SMAD2
MOB3B.1	3.71263e-132	-0.703816	0.033	0.215	9.52845e-128	T2	MOB3B
RTN4.1	1.08604e-214	-0.705385	0.86	0.918	2.78733e-210	T2	RTN4
LHX2.1	1.35594e-101	-0.705876	0.203	0.377	3.48001e-97	T2	LHX2
DDHD1.1	1.35555e-88	-0.715957	0.236	0.4	3.47901e-84	T2	DDHD1
CA14.1	1.6317e-115	-0.717418	0.084	0.266	4.18777e-111	T2	CA14
ADAMTS6.1	1.48376e-125	-0.721546	0.041	0.217	3.80806e-121	T2	ADAMTS6
AES	8.57054e-163	-0.722823	0.285	0.528	2.19963e-158	T2	AES
DNAJB1	1.08495e-32	-0.735315	0.329	0.407	2.78452e-28	T2	DNAJB1
PMEPA1.1	1.51295e-92	-0.742556	0.45	0.58	3.88297e-88	T2	PMEPA1
WIF1.1	6.9618e-75	-0.749136	0.021	0.132	1.78675e-70	T2	WIF1
MAP1B	4.18618e-233	-0.752518	0.687	0.86	1.07438e-228	T2	MAP1B
TMEM37.1	2.08529e-144	-0.755556	0.021	0.209	5.35188e-140	T2	TMEM37
HES5.1	2.09088e-125	-0.760847	0.252	0.471	5.36625e-121	T2	HES5
RALYL.1	5.82799e-45	-0.764552	0.053	0.14	1.49575e-40	T2	RALYL
SMIM20.1	2.7375e-125	-0.764798	0.199	0.402	7.02579e-121	T2	SMIM20
TOX3.1	6.29629e-117	-0.765319	0.23	0.428	1.61594e-112	T2	TOX3
REST.1	4.12265e-147	-0.768154	0.075	0.288	1.05808e-142	T2	REST
CADM1.1	2.32194e-133	-0.771249	0.325	0.535	5.95925e-129	T2	CADM1
CNTNAP2.1	3.02111e-40	-0.775651	0.06	0.141	7.75368e-36	T2	CNTNAP2
MCAM.1	5.59606e-117	-0.787882	0.043	0.214	1.43623e-112	T2	MCAM
LINC01833.1	5.58434e-117	-0.790846	0.237	0.428	1.43322e-112	T2	LINC01833
MEIS2.1	7.49077e-25	-0.806473	0.245	0.325	1.92251e-20	T2	MEIS2
FZD5.1	1.93689e-152	-0.812774	0.07	0.285	4.97103e-148	T2	FZD5
HSPA1B	2.2906e-46	-0.825664	0.45	0.54	5.87883e-42	T2	HSPA1B
AL512380.1.1	2.3124e-58	-0.82916	0.041	0.141	5.93478e-54	T2	AL512380.1
LGI4.1	1.31343e-146	-0.83236	0.071	0.284	3.37091e-142	T2	LGI4
VSX2.1	2.22946e-166	-0.838555	0.054	0.28	5.72191e-162	T2	VSX2
STON2.1	1.56165e-148	-0.846198	0.137	0.359	4.00799e-144	T2	STON2
MYO10.1	6.09672e-132	-0.847286	0.172	0.381	1.56472e-127	T2	MYO10
CREB5.1	6.33994e-154	-0.858421	0.071	0.288	1.62715e-149	T2	CREB5
IER2.1	5.92125e-109	-0.865729	0.433	0.579	1.51969e-104	T2	IER2
CCDC34.1	3.15784e-143	-0.871239	0.164	0.387	8.1046e-139	T2	CCDC34
AC009041.2.1	8.34846e-150	-0.876477	0.035	0.237	2.14263e-145	T2	AC009041.2
KDR.1	5.27954e-168	-0.881109	0.028	0.245	1.35499e-163	T2	KDR
FABP7.1	3.23173e-118	-0.88588	0.384	0.565	8.29424e-114	T2	FABP7
SLC1A3.1	6.6917e-157	-0.899323	0.07	0.289	1.71742e-152	T2	SLC1A3
TUBA1B.1	2.39099e-154	-0.904954	0.68	0.769	6.13647e-150	T2	TUBA1B
HES4.1	1.12988e-167	-0.909559	0.296	0.545	2.89984e-163	T2	HES4
COL2A1.1	1.9459e-191	-0.933141	0.033	0.274	4.99415e-187	T2	COL2A1
MYB.1	5.35495e-187	-0.941993	0.107	0.363	1.37435e-182	T2	MYB
BAMBI.1	4.8668e-161	-0.965549	0.121	0.352	1.24906e-156	T2	BAMBI
LIMCH1.1	2.18403e-199	-0.997523	0.046	0.301	5.60532e-195	T2	LIMCH1
GATB.1	1.55777e-182	-1.00045	0.107	0.358	3.99801e-178	T2	GATB
JUN.1	1.74316e-181	-1.00844	0.691	0.811	4.47383e-177	T2	JUN
JUNB.1	3.0271e-85	-1.02014	0.269	0.416	7.76906e-81	T2	JUNB
FOSB.1	1.68725e-180	-1.03633	0.065	0.305	4.33033e-176	T2	FOSB
DUSP1.1	1.40316e-146	-1.04826	0.465	0.632	3.60122e-142	T2	DUSP1
CKB.1	0	-1.06726	0.944	0.985	0	T2	CKB
GAS1.1	4.68045e-149	-1.07107	0.099	0.313	1.20124e-144	T2	GAS1
QDPR.1	7.82078e-173	-1.10823	0.162	0.4	2.0072e-168	T2	QDPR
SELENOP.1	4.29903e-222	-1.11694	0.146	0.43	1.10335e-217	T2	SELENOP
PLP1.1	3.78856e-212	-1.11907	0.046	0.309	9.72333e-208	T2	PLP1
ID1.1	2.85525e-197	-1.15366	0.22	0.481	7.32799e-193	T2	ID1
PRSS35.1	6.98028e-195	-1.18104	0.04	0.286	1.79149e-190	T2	PRSS35
RAX.1	4.00543e-238	-1.18535	0.24	0.525	1.02799e-233	T2	RAX
TLE4	1.93605e-283	-1.20473	0.115	0.455	4.96887e-279	T2	TLE4
ID4.1	5.97827e-221	-1.22331	0.159	0.438	1.53432e-216	T2	ID4
SOX9.1	1.52783e-283	-1.23481	0.187	0.52	3.92116e-279	T2	SOX9
GPM6B.1	1.77693e-275	-1.23578	0.316	0.599	4.5605e-271	T2	GPM6B
FXYD1.1	3.22692e-276	-1.25156	0.091	0.416	8.2819e-272	T2	FXYD1
EGR1.1	5.42934e-145	-1.26577	0.131	0.341	1.39344e-140	T2	EGR1
ASCL1.1	1.28117e-264	-1.44655	0.209	0.512	3.28811e-260	T2	ASCL1
MEG3	0	-1.50427	0.261	0.65	0	T2	MEG3
TTYH1.1	0	-1.57544	0.24	0.596	0	T2	TTYH1
SAT1.1	5.46766e-149	-1.59298	0.26	0.456	1.40328e-144	T2	SAT1
SOX2.1	0	-1.62827	0.39	0.662	0	T2	SOX2
ID3.1	1.02761e-186	-1.64519	0.125	0.37	2.63735e-182	T2	ID3
TF.1	3.74399e-217	-1.72525	0.095	0.37	9.60895e-213	T2	TF
CYR61.1	0	-1.81685	0.065	0.412	0	T2	CYR61
ZFP36L1.1	0	-1.9115	0.17	0.578	0	T2	ZFP36L1
SFRP2.1	0	-1.91497	0.156	0.526	0	T2	SFRP2
VIM.1	0	-1.97904	0.74	0.838	0	T2	VIM
SPP1.1	0	-2.05586	0.263	0.666	0	T2	SPP1
FOS.1	0	-2.24622	0.467	0.739	0	T2	FOS
ZFP36L2.1	0	-2.40558	0.254	0.654	0	T2	ZFP36L2
HES1.1	0	-2.53655	0.191	0.58	0	T2	HES1
CCND1.1	0	-2.67655	0.217	0.674	0	T2	CCND1
ATOH7.1	0	3.24111	0.478	0.049	0	T1	ATOH7
OTX2.2	0	2.93898	0.819	0.111	0	T1	OTX2
NEUROD1.1	0	2.49949	0.823	0.165	0	T1	NEUROD1
VXN	0	2.32267	0.611	0.024	0	T1	VXN
HES6	0	2.19678	0.95	0.419	0	T1	HES6
GADD45G.1	0	2.09037	0.783	0.257	0	T1	GADD45G
FAM131C.1	0	2.05587	0.633	0.08	0	T1	FAM131C
MYBL1	0	1.77339	0.593	0.064	0	T1	MYBL1
GADD45A.2	0	1.7561	0.645	0.216	0	T1	GADD45A
SSX2IP	0	1.69839	0.632	0.189	0	T1	SSX2IP
NEUROD4.2	0	1.65797	0.675	0.153	0	T1	NEUROD4
PCBP4.2	0	1.61612	0.762	0.333	0	T1	PCBP4
INSM1.1	0	1.56265	0.633	0.162	0	T1	INSM1
OLIG2	0	1.53653	0.46	0.018	0	T1	OLIG2
NEUROG2	0	1.39719	0.385	0.029	0	T1	NEUROG2
CSRP2	4.06602e-274	1.3828	0.792	0.437	1.04354e-269	T1	CSRP2
RASD1	0	1.36653	0.587	0.155	0	T1	RASD1
DLL4	0	1.36122	0.496	0.068	0	T1	DLL4
MFNG	0	1.34546	0.497	0.041	0	T1	MFNG
DLL3	0	1.34509	0.523	0.12	0	T1	DLL3
MPPED2	0	1.34195	0.746	0.301	0	T1	MPPED2
STK39	0	1.30128	0.481	0.09	0	T1	STK39
SH3BGRL3.1	1.5716e-239	1.28854	0.682	0.345	4.0335e-235	T1	SH3BGRL3
FAM89A	0	1.25326	0.459	0.103	0	T1	FAM89A
KLHDC8A	0	1.24904	0.401	0.031	0	T1	KLHDC8A
2004-09-01	0	1.18324	0.491	0.141	0	T1	2004-09-01
MFAP4	0	1.16532	0.367	0.04	0	T1	MFAP4
PTH2	1.38243e-127	1.16127	0.204	0.055	3.54801e-123	T1	PTH2
CRX	0	1.14955	0.342	0.037	0	T1	CRX
SESN3	6.34142e-276	1.14737	0.48	0.149	1.62752e-271	T1	SESN3
NELL2	0	1.14591	0.678	0.263	0	T1	NELL2
SMAD2.1	5.24699e-278	1.13864	0.726	0.336	1.34664e-273	T1	SMAD2
GNG5	0	1.13692	0.864	0.515	0	T1	GNG5
PIK3R1	1.39898e-140	1.09771	0.549	0.291	3.59048e-136	T1	PIK3R1
PFN2	4.13418e-189	1.07422	0.644	0.334	1.06104e-184	T1	PFN2
RGS16	4.31894e-187	1.07011	0.835	0.535	1.10845e-182	T1	RGS16
SEMA5A	7.64855e-264	1.06718	0.448	0.135	1.963e-259	T1	SEMA5A
BSG	9.78213e-275	1.06345	0.914	0.692	2.51058e-270	T1	BSG
PAK3	2.65052e-301	1.05494	0.524	0.162	6.80255e-297	T1	PAK3
MIAT	2.66156e-213	1.04481	0.891	0.628	6.83089e-209	T1	MIAT
RXRG	0	1.03915	0.328	0.041	0	T1	RXRG
PRDM1	0	1.0352	0.262	0.031	0	T1	PRDM1
CBFA2T2	0	1.03215	0.472	0.104	0	T1	CBFA2T2
MSI1	4.7759e-237	1.00687	0.772	0.42	1.22573e-232	T1	MSI1
KLHL35	7.07075e-268	1.00664	0.256	0.044	1.81471e-263	T1	KLHL35
HNRNPH3	1.93322e-252	1.00248	0.884	0.654	4.96162e-248	T1	HNRNPH3
ZEB1	6.38444e-279	1.00236	0.573	0.198	1.63857e-274	T1	ZEB1
AMER2	1.95257e-136	0.983173	0.639	0.374	5.01127e-132	T1	AMER2
NEUROG1	0	0.97305	0.21	0.004	0	T1	NEUROG1
CRYBG3	0	0.970795	0.377	0.067	0	T1	CRYBG3
SRRM4.1	2.33488e-270	0.968146	0.588	0.203	5.99246e-266	T1	SRRM4
FABP7.2	1.07567e-18	0.960901	0.614	0.532	2.76071e-14	T1	FABP7
RORB	3.60518e-266	0.953658	0.988	0.946	9.2527e-262	T1	RORB
TTC14	3.26037e-180	0.948073	0.63	0.321	8.36774e-176	T1	TTC14
CCNG2.2	3.37212e-193	0.944508	0.612	0.281	8.65454e-189	T1	CCNG2
RBP1.1	0	0.925571	0.975	0.843	0	T1	RBP1
CCDC181	7.31946e-230	0.918196	0.461	0.152	1.87854e-225	T1	CCDC181
RHOBTB3	4.33247e-188	0.911055	0.719	0.397	1.11193e-183	T1	RHOBTB3
UBE2S	2.48814e-66	0.900994	0.574	0.377	6.38582e-62	T1	UBE2S
DSP	4.24977e-193	0.896893	0.366	0.114	1.0907e-188	T1	DSP
ALDH7A1	3.34168e-132	0.891436	0.517	0.259	8.57641e-128	T1	ALDH7A1
ZBTB18	2.98584e-202	0.87216	0.509	0.19	7.66316e-198	T1	ZBTB18
PCSK2	9.21445e-275	0.871462	0.34	0.075	2.36489e-270	T1	PCSK2
GRAMD2B	0	0.868339	0.257	0.014	0	T1	GRAMD2B
CHRNA1	0	0.835281	0.259	0.007	0	T1	CHRNA1
TRH	1.16719e-31	0.825501	0.443	0.325	2.9956e-27	T1	TRH
SERPINF1	0	0.823787	0.291	0.044	0	T1	SERPINF1
ZHX1	5.78866e-184	0.819485	0.485	0.19	1.48566e-179	T1	ZHX1
ODC1	4.02327e-160	0.816478	0.778	0.486	1.03257e-155	T1	ODC1
SHD	4.60577e-243	0.814352	0.381	0.102	1.18207e-238	T1	SHD
DST	1.32217e-150	0.812828	0.748	0.456	3.39335e-146	T1	DST
KCNK3	0	0.808724	0.287	0.038	0	T1	KCNK3
MIR7-3HG	1.41223e-215	0.794494	0.283	0.065	3.62449e-211	T1	MIR7-3HG
GOLIM4	5.63239e-160	0.79403	0.448	0.178	1.44555e-155	T1	GOLIM4
DLL1	3.29888e-225	0.793459	0.275	0.059	8.46658e-221	T1	DLL1
RCOR2.1	3.33155e-168	0.791647	0.492	0.203	8.55043e-164	T1	RCOR2
TLE3	1.17083e-148	0.780691	0.484	0.209	3.00494e-144	T1	TLE3
RBPJ	8.95548e-157	0.774283	0.838	0.579	2.29842e-152	T1	RBPJ
NRL	9.3088e-88	0.773811	0.418	0.205	2.3891e-83	T1	NRL
FRYL	5.55167e-128	0.772062	0.559	0.288	1.42484e-123	T1	FRYL
TMX1	6.57174e-157	0.761291	0.485	0.207	1.68664e-152	T1	TMX1
HIST1H1C	2.22162e-105	0.758111	0.404	0.183	5.70178e-101	T1	HIST1H1C
ATP2B1	4.33777e-132	0.74497	0.497	0.233	1.11329e-127	T1	ATP2B1
TMEM123.1	1.71225e-145	0.719792	0.631	0.323	4.39449e-141	T1	TMEM123
CXCR4.1	1.85851e-98	0.710502	0.61	0.353	4.76985e-94	T1	CXCR4
MIB1	1.97633e-143	0.707499	0.423	0.171	5.07224e-139	T1	MIB1
GRINA	1.45617e-150	0.706959	0.455	0.188	3.73725e-146	T1	GRINA
RHBDL3	6.21501e-282	0.704026	0.314	0.061	1.59508e-277	T1	RHBDL3
EPB41	7.92294e-118	0.702737	0.549	0.288	2.03342e-113	T1	EPB41
DCX.1	3.92788e-42	-0.701881	0.098	0.237	1.00809e-37	T1	DCX
RAB3A.1	6.09072e-58	-0.706792	0.052	0.214	1.56318e-53	T1	RAB3A
PRDM13.2	3.0138e-38	-0.707485	0.035	0.148	7.73491e-34	T1	PRDM13
ANK3.1	7.87444e-43	-0.710099	0.105	0.249	2.02097e-38	T1	ANK3
C1orf61.1	2.85693e-22	-0.713885	0.168	0.259	7.33231e-18	T1	C1orf61
FOSB.2	9.27611e-41	-0.715111	0.138	0.28	2.38071e-36	T1	FOSB
BAMBI.2	3.18068e-44	-0.720103	0.179	0.329	8.1632e-40	T1	BAMBI
SPP1.2	8.7856e-23	-0.720853	0.622	0.605	2.25482e-18	T1	SPP1
PBX1	3.47461e-42	-0.726652	0.281	0.423	8.91758e-38	T1	PBX1
GRIA2.1	4.9357e-58	-0.730718	0.027	0.182	1.26675e-53	T1	GRIA2
LRRN3	8.23453e-52	-0.735501	0.136	0.307	2.11339e-47	T1	LRRN3
MLLT11.2	2.73071e-23	-0.745663	0.504	0.53	7.00837e-19	T1	MLLT11
NREP.2	2.0656e-47	-0.750938	0.602	0.653	5.30137e-43	T1	NREP
SOX9.2	5.39941e-44	-0.754844	0.353	0.481	1.38576e-39	T1	SOX9
MIR124-2HG.1	1.88174e-43	-0.758736	0.148	0.292	4.82948e-39	T1	MIR124-2HG
LHX9.1	1.16848e-10	-0.759352	0.178	0.228	2.99889e-06	T1	LHX9
SRGAP3	1.15795e-76	-0.765699	0.354	0.554	2.97187e-72	T1	SRGAP3
MGARP	7.65979e-107	-0.777139	0.574	0.736	1.96589e-102	T1	MGARP
JUN.2	1.08201e-49	-0.778359	0.778	0.794	2.77697e-45	T1	JUN
MAPT.1	2.91231e-60	-0.779896	0.05	0.216	7.47444e-56	T1	MAPT
GAD2.1	2.36321e-47	-0.782167	0.036	0.17	6.06519e-43	T1	GAD2
AP1S2.1	3.62282e-54	-0.786436	0.168	0.339	9.29796e-50	T1	AP1S2
ZFHX4.1	1.08073e-37	-0.789899	0.078	0.202	2.77368e-33	T1	ZFHX4
NTM.1	4.61019e-58	-0.796192	0.055	0.221	1.1832e-53	T1	NTM
FAT3	7.43908e-55	-0.799825	0.081	0.246	1.90924e-50	T1	FAT3
RBFOX2.1	3.1852e-49	-0.811877	0.194	0.346	8.17481e-45	T1	RBFOX2
CITED2	2.83899e-66	-0.815946	0.217	0.411	7.28628e-62	T1	CITED2
ID2	7.03719e-50	-0.818246	0.241	0.405	1.80609e-45	T1	ID2
TRPM3.1	1.30335e-73	-0.827768	0.067	0.267	3.34505e-69	T1	TRPM3
SCG5.1	7.49665e-51	-0.838493	0.141	0.298	1.92402e-46	T1	SCG5
CNTNAP2.2	4.73064e-32	-0.853065	0.037	0.137	1.21412e-27	T1	CNTNAP2
KIF5C.1	1.84031e-40	-0.853122	0.227	0.355	4.72316e-36	T1	KIF5C
QDPR.2	3.53378e-45	-0.853377	0.233	0.376	9.06944e-41	T1	QDPR
PMEPA1.2	1.78518e-66	-0.856005	0.423	0.572	4.58167e-62	T1	PMEPA1
CD24.2	3.47022e-36	-0.856953	0.421	0.509	8.90633e-32	T1	CD24
ZFHX3.1	6.60351e-34	-0.859714	0.107	0.225	1.69479e-29	T1	ZFHX3
RALYL.2	3.62969e-39	-0.859838	0.024	0.135	9.3156e-35	T1	RALYL
DAAM1	1.09928e-111	-0.860528	0.522	0.7	2.8213e-107	T1	DAAM1
ZNF385D.1	4.00984e-56	-0.860858	0.296	0.466	1.02912e-51	T1	ZNF385D
ID1.2	1.00911e-35	-0.86207	0.352	0.45	2.58989e-31	T1	ID1
APLP1.2	2.43879e-68	-0.870615	0.12	0.311	6.25916e-64	T1	APLP1
NES.1	4.13189e-79	-0.873904	0.158	0.377	1.06045e-74	T1	NES
TLE4.1	2.74864e-71	-0.880698	0.22	0.42	7.05438e-67	T1	TLE4
METRN.1	2.51717e-66	-0.881263	0.199	0.391	6.46031e-62	T1	METRN
AL512380.1.2	1.47176e-37	-0.890736	0.026	0.134	3.77728e-33	T1	AL512380.1
INA.1	5.44523e-64	-0.906339	0.156	0.339	1.39752e-59	T1	INA
CLU.1	2.79769e-94	-0.924008	0.493	0.656	7.18026e-90	T1	CLU
PLP1.2	1.783e-70	-0.924828	0.089	0.285	4.57608e-66	T1	PLP1
AL391650.1.2	5.75727e-86	-0.9364	0.217	0.442	1.4776e-81	T1	AL391650.1
FEZ1.1	1.83999e-93	-0.937519	0.066	0.301	4.72234e-89	T1	FEZ1
HES4.2	3.34738e-58	-0.93973	0.372	0.519	8.59105e-54	T1	HES4
PRSS35.2	5.53811e-56	-0.942528	0.094	0.262	1.42136e-51	T1	PRSS35
NSG1.1	1.48717e-74	-0.967312	0.094	0.296	3.81683e-70	T1	NSG1
CRABP1	1.62591e-169	-0.984152	0.948	0.953	4.17289e-165	T1	CRABP1
ONECUT2.2	2.76879e-10	-0.987766	0.168	0.212	7.10609e-06	T1	ONECUT2
NSG2.1	1.13366e-65	-1.00516	0.067	0.246	2.90955e-61	T1	NSG2
PCP4.1	3.12626e-16	-1.02632	0.084	0.153	8.02354e-12	T1	PCP4
GRIA4	3.61833e-105	-1.03962	0.123	0.384	9.28644e-101	T1	GRIA4
PTF1A.2	1.87771e-29	-1.04016	0.069	0.171	4.81914e-25	T1	PTF1A
ZFP36L2.2	2.96177e-41	-1.07771	0.587	0.595	7.60139e-37	T1	ZFP36L2
MIR181A1HG.1	6.19121e-66	-1.07874	0.09	0.271	1.58897e-61	T1	MIR181A1HG
ZFP36L1.2	9.51957e-76	-1.12001	0.382	0.529	2.4432e-71	T1	ZFP36L1
TUBB2A.1	1.02605e-99	-1.1262	0.315	0.537	2.63335e-95	T1	TUBB2A
PCSK1N.1	1.89146e-99	-1.16179	0.199	0.437	4.85443e-95	T1	PCSK1N
RUNX1T1.2	1.08693e-85	-1.16567	0.052	0.268	2.78961e-81	T1	RUNX1T1
SFRP2.2	1.11141e-57	-1.19091	0.354	0.48	2.85244e-53	T1	SFRP2
RND3.1	2.80635e-55	-1.21759	0.147	0.315	7.2025e-51	T1	RND3
PCDH9.1	6.75227e-81	-1.23019	0.072	0.282	1.73297e-76	T1	PCDH9
DKK3.1	3.58257e-154	-1.24604	0.365	0.626	9.19466e-150	T1	DKK3
VIM.2	7.87039e-81	-1.25358	0.872	0.819	2.01993e-76	T1	VIM
PAX6.1	1.47862e-285	-1.26735	0.735	0.913	3.79487e-281	T1	PAX6
CELF4.1	1.39919e-80	-1.29677	0.099	0.31	3.59103e-76	T1	CELF4
FOS.2	7.91182e-72	-1.29778	0.611	0.706	2.03057e-67	T1	FOS
ID3.2	1.20539e-57	-1.3347	0.174	0.347	3.09363e-53	T1	ID3
CYR61.2	6.1889e-84	-1.35947	0.159	0.376	1.58838e-79	T1	CYR61
SAT1.2	7.18267e-57	-1.41797	0.285	0.439	1.84343e-52	T1	SAT1
STMN4.1	6.99294e-99	-1.43117	0.13	0.366	1.79474e-94	T1	STMN4
TTYH1.2	2.29312e-144	-1.46143	0.314	0.562	5.88529e-140	T1	TTYH1
RTN1.1	4.94077e-112	-1.52003	0.177	0.429	1.26805e-107	T1	RTN1
LMO4.1	6.06133e-70	-1.59006	0.179	0.376	1.55564e-65	T1	LMO4
TFAP2B.1	2.91861e-112	-1.6649	0.051	0.308	7.49062e-108	T1	TFAP2B
MEIS2.2	2.98215e-38	-1.68976	0.199	0.323	7.65369e-34	T1	MEIS2
TF.2	1.08837e-101	-1.73299	0.102	0.348	2.79331e-97	T1	TF
HES1.2	9.31645e-116	-1.78157	0.304	0.54	2.39107e-111	T1	HES1
TFAP2A.1	6.29997e-109	-1.84622	0.078	0.333	1.61689e-104	T1	TFAP2A
STMN2.2	3.25689e-127	-2.23273	0.501	0.663	8.3588e-123	T1	STMN2
ONECUT2.3	0	2.79851	0.908	0.123	0	HCs	ONECUT2
ONECUT1.1	0	2.74059	0.856	0.055	0	HCs	ONECUT1
CNTNAP2.3	0	2.66278	0.721	0.056	0	HCs	CNTNAP2
LHX1.1	0	2.30268	0.519	0.009	0	HCs	LHX1
STMN2.3	0	2.20086	0.989	0.609	0	HCs	STMN2
CACNG3.1	0	2.08337	0.669	0.033	0	HCs	CACNG3
PROX1.1	0	1.98011	0.814	0.255	0	HCs	PROX1
STMN4.2	0	1.97944	0.903	0.28	0	HCs	STMN4
AL512380.1.3	0	1.88606	0.426	0.089	0	HCs	AL512380.1
TFAP2B.2	0	1.87156	0.898	0.214	0	HCs	TFAP2B
C1QL1.1	0	1.82174	0.505	0.07	0	HCs	C1QL1
ONECUT3.1	0	1.74789	0.577	0.022	0	HCs	ONECUT3
HTRA1	0	1.69572	0.552	0.053	0	HCs	HTRA1
RTN1.2	0	1.65585	0.922	0.347	0	HCs	RTN1
CXXC5.2	0	1.57106	0.936	0.55	0	HCs	CXXC5
NSG2.2	0	1.47581	0.727	0.172	0	HCs	NSG2
PPP1R1A.1	0	1.38932	0.608	0.119	0	HCs	PPP1R1A
IER5L	0	1.38897	0.55	0.185	0	HCs	IER5L
TNR	0	1.38598	0.366	0.004	0	HCs	TNR
FAM107B.1	0	1.37543	0.587	0.161	0	HCs	FAM107B
THSD7A.1	0	1.35643	0.63	0.158	0	HCs	THSD7A
CNTN4	0	1.34982	0.504	0.059	0	HCs	CNTN4
MAPT.2	0	1.29662	0.651	0.149	0	HCs	MAPT
TPM3	0	1.24376	0.685	0.277	0	HCs	TPM3
TAGLN3.1	0	1.13964	0.861	0.445	0	HCs	TAGLN3
PTF1A.3	2.37791e-227	1.10671	0.392	0.135	6.10291e-223	HCs	PTF1A
LHX1-DT	0	1.09511	0.289	0.005	0	HCs	LHX1-DT
NSG1.2	0	1.09375	0.688	0.23	0	HCs	NSG1
GRIA3	0	1.09209	0.344	0.036	0	HCs	GRIA3
SOX4.2	0	1.09056	0.994	0.977	0	HCs	SOX4
PCDH9.2	5.62125e-263	1.08634	0.537	0.233	1.44269e-258	HCs	PCDH9
MALT1	0	1.08434	0.387	0.086	0	HCs	MALT1
TUBB2B.1	0	1.0841	0.988	0.943	0	HCs	TUBB2B
YPEL2	0	1.05874	0.425	0.095	0	HCs	YPEL2
LINGO1.1	0	1.05678	0.481	0.108	0	HCs	LINGO1
TLE4.2	2.58796e-202	1.05244	0.622	0.378	6.64201e-198	HCs	TLE4
CD24.3	0	1.04742	0.889	0.455	0	HCs	CD24
TANC1	0	1.04701	0.416	0.088	0	HCs	TANC1
B3GAT2	0	1.03465	0.344	0.05	0	HCs	B3GAT2
NHSL1	0	1.01564	0.585	0.248	0	HCs	NHSL1
JPT1.1	0	1.00527	0.86	0.573	0	HCs	JPT1
LMO1	0	1.00322	0.322	0.033	0	HCs	LMO1
NDRG4	0	1.00099	0.513	0.16	0	HCs	NDRG4
INA.2	0	1.00094	0.717	0.277	0	HCs	INA
TMEFF2	0	0.998726	0.283	0.02	0	HCs	TMEFF2
ARL4C.1	2.38423e-272	0.99173	0.588	0.27	6.11912e-268	HCs	ARL4C
CAMK2N1.1	9.34917e-253	0.966495	0.727	0.43	2.39947e-248	HCs	CAMK2N1
NDST3	0	0.96334	0.303	0.021	0	HCs	NDST3
RHOB	1.30696e-207	0.956972	0.637	0.364	3.35431e-203	HCs	RHOB
AC016044.1	0	0.945066	0.301	0.009	0	HCs	AC016044.1
CDC42EP3	2.12113e-297	0.941277	0.501	0.188	5.44387e-293	HCs	CDC42EP3
NTRK2	0	0.929992	0.344	0.039	0	HCs	NTRK2
EVL.1	2.28738e-290	0.924876	0.707	0.369	5.87056e-286	HCs	EVL
TMSB10.2	0	0.919699	0.995	0.97	0	HCs	TMSB10
SEPT4.1	0	0.901649	0.442	0.133	0	HCs	2004-09-01
SCRT2.1	0	0.895883	0.403	0.081	0	HCs	SCRT2
TTC9B.1	0	0.895715	0.461	0.111	0	HCs	TTC9B
DRD2	0	0.891486	0.243	0.002	0	HCs	DRD2
C4orf48.1	1.53679e-282	0.884454	0.732	0.4	3.94418e-278	HCs	C4orf48
APBB2	0	0.883148	0.423	0.112	0	HCs	APBB2
ROBO2	1.42365e-283	0.862048	0.424	0.139	3.6538e-279	HCs	ROBO2
TMOD1	0	0.845909	0.226	0.003	0	HCs	TMOD1
MLLT11.3	2.04244e-294	0.841388	0.84	0.49	5.24191e-290	HCs	MLLT11
MTSS1.1	7.5213e-274	0.837383	0.406	0.129	1.93034e-269	HCs	MTSS1
NKAIN2	0	0.835593	0.235	0.007	0	HCs	NKAIN2
MT-ND1	0	0.827864	0.971	0.852	0	HCs	MT-ND1
COX6A1	3.48616e-292	0.825469	0.87	0.639	8.94722e-288	HCs	COX6A1
CRMP1.1	2.57202e-300	0.823228	0.807	0.456	6.6011e-296	HCs	CRMP1
ZEB2	7.9181e-222	0.813997	0.816	0.578	2.03218e-217	HCs	ZEB2
MEGF11	0	0.811733	0.233	0.009	0	HCs	MEGF11
HIST3H2A	2.25857e-227	0.811568	0.674	0.368	5.79661e-223	HCs	HIST3H2A
IGLON5.1	7.31051e-293	0.796431	0.473	0.16	1.87624e-288	HCs	IGLON5
BASP1.2	0	0.794629	0.944	0.745	0	HCs	BASP1
TENM2	0	0.783547	0.26	0.035	0	HCs	TENM2
GPR85	0	0.770719	0.346	0.071	0	HCs	GPR85
GALR2	0	0.767201	0.222	0.012	0	HCs	GALR2
SPTBN1	7.14371e-245	0.76509	0.454	0.169	1.83343e-240	HCs	SPTBN1
MEGF10	0	0.762218	0.251	0.025	0	HCs	MEGF10
DCX.2	2.88791e-292	0.760984	0.535	0.189	7.41183e-288	HCs	DCX
MGST3	8.70673e-211	0.758974	0.759	0.497	2.23458e-206	HCs	MGST3
PAK5	9.32145e-294	0.755534	0.327	0.08	2.39235e-289	HCs	PAK5
EEF1A2	2.35016e-221	0.752914	0.303	0.088	6.03169e-217	HCs	EEF1A2
TFAP2A.2	0	0.747949	0.751	0.26	0	HCs	TFAP2A
SCG5.2	4.8857e-287	0.747723	0.61	0.247	1.25391e-282	HCs	SCG5
MAP7	6.2686e-301	0.745975	0.293	0.065	1.60884e-296	HCs	MAP7
PCSK1N.2	3.50862e-206	0.736513	0.71	0.384	9.00488e-202	HCs	PCSK1N
CITED2.1	8.18391e-170	0.731395	0.634	0.367	2.1004e-165	HCs	CITED2
KIF5C.2	1.062e-280	0.730894	0.677	0.305	2.72564e-276	HCs	KIF5C
CCNI.1	0	0.727468	0.962	0.888	0	HCs	CCNI
PLXNA2.2	1.0202e-286	0.722277	0.398	0.114	2.61835e-282	HCs	PLXNA2
MT-ND3	9.0268e-243	0.718203	0.976	0.885	2.31673e-238	HCs	MT-ND3
TUBB2A.2	1.5392e-278	0.716944	0.827	0.483	3.95036e-274	HCs	TUBB2A
LINC01896	0	0.71539	0.182	0.006	0	HCs	LINC01896
CALB1	5.17146e-106	0.715355	0.102	0.021	1.32726e-101	HCs	CALB1
BARHL2.1	6.99868e-280	0.71081	0.39	0.112	1.79621e-275	HCs	BARHL2
FLRT3	2.44266e-279	0.710647	0.262	0.055	6.26908e-275	HCs	FLRT3
NT5C3B	2.35059e-181	0.708879	0.496	0.237	6.0328e-177	HCs	NT5C3B
MT1F	0	0.707279	0.239	0.027	0	HCs	MT1F
LNP1	6.57787e-284	0.704847	0.272	0.059	1.68821e-279	HCs	LNP1
RAB11FIP4	0	0.704204	0.268	0.038	0	HCs	RAB11FIP4
ENO1.1	3.10459e-148	-0.701051	0.838	0.913	7.96793e-144	HCs	ENO1
RBPJ.1	1.54094e-113	-0.701095	0.419	0.62	3.95482e-109	HCs	RBPJ
TMEM37.2	9.72614e-100	-0.70312	0.023	0.201	2.49621e-95	HCs	TMEM37
ARHGEF26.1	8.79491e-112	-0.708953	0.046	0.252	2.25721e-107	HCs	ARHGEF26
RLBP1.1	1.33433e-85	-0.709748	0.014	0.165	3.42456e-81	HCs	RLBP1
CADM2.1	7.08696e-69	-0.710303	0.175	0.343	1.81887e-64	HCs	CADM2
TPPP3.1	1.60485e-84	-0.718914	0.09	0.268	4.11885e-80	HCs	TPPP3
TLE3.1	7.30778e-97	-0.720681	0.062	0.25	1.87554e-92	HCs	TLE3
DARS	2.31126e-107	-0.721459	0.176	0.396	5.93184e-103	HCs	DARS
LMAN1.1	6.29332e-97	-0.721949	0.257	0.453	1.61518e-92	HCs	LMAN1
DDIT4.1	7.36507e-86	-0.723398	0.487	0.648	1.89025e-81	HCs	DDIT4
SLITRK2	1.0575e-102	-0.723519	0.017	0.196	2.71407e-98	HCs	SLITRK2
EML1.1	9.7135e-112	-0.724622	0.065	0.276	2.49297e-107	HCs	EML1
ADAMTS6.2	7.10306e-108	-0.725821	0.023	0.212	1.823e-103	HCs	ADAMTS6
MOB3B.2	7.80883e-114	-0.730599	0.016	0.209	2.00414e-109	HCs	MOB3B
ZBTB18.1	4.00389e-94	-0.730902	0.053	0.234	1.0276e-89	HCs	ZBTB18
BAMBI.3	4.06519e-76	-0.739994	0.16	0.337	1.04333e-71	HCs	BAMBI
OSTC.1	2.07346e-113	-0.744451	0.258	0.473	5.32153e-109	HCs	OSTC
PRSS23.1	2.06101e-97	-0.745631	0.06	0.251	5.28957e-93	HCs	PRSS23
FAM184B.1	2.56264e-103	-0.749616	0.074	0.275	6.57701e-99	HCs	FAM184B
MSI1.1	1.70129e-101	-0.74995	0.265	0.468	4.36636e-97	HCs	MSI1
EPHB2	4.35902e-97	-0.755982	0.211	0.414	1.11874e-92	HCs	EPHB2
FOSB.3	5.2632e-66	-0.758662	0.133	0.286	1.3508e-61	HCs	FOSB
RND3.2	3.17063e-17	-0.762206	0.243	0.309	8.13743e-13	HCs	RND3
BNIP3.2	5.29247e-59	-0.762585	0.521	0.614	1.35831e-54	HCs	BNIP3
CDK6.1	7.74786e-125	-0.76348	0.022	0.234	1.98849e-120	HCs	CDK6
NAP1L1	4.00386e-185	-0.763734	0.698	0.823	1.02759e-180	HCs	NAP1L1
WIF1.2	8.74234e-63	-0.766768	0.013	0.129	2.24372e-58	HCs	WIF1
KIAA1147.1	1.18076e-98	-0.770454	0.061	0.253	3.03041e-94	HCs	KIAA1147
BCHE.1	1.28334e-131	-0.775385	0.037	0.265	3.29368e-127	HCs	BCHE
FAM69C.1	3.18371e-124	-0.780645	0.014	0.22	8.17099e-120	HCs	FAM69C
B2M.1	2.38859e-127	-0.780858	0.076	0.311	6.13032e-123	HCs	B2M
OTX2.3	2.45261e-33	-0.786742	0.083	0.174	6.29464e-29	HCs	OTX2
MUM1.1	8.76699e-130	-0.789331	0.38	0.603	2.25005e-125	HCs	MUM1
LAPTM4A	5.1242e-142	-0.789959	0.234	0.485	1.31513e-137	HCs	LAPTM4A
GRID2	3.72173e-114	-0.790402	0.041	0.247	9.55182e-110	HCs	GRID2
JUNB.2	2.75443e-33	-0.791009	0.31	0.405	7.06924e-29	HCs	JUNB
METRN.2	6.2911e-74	-0.792017	0.228	0.395	1.61461e-69	HCs	METRN
RCN1.1	1.92933e-126	-0.792231	0.246	0.48	4.95162e-122	HCs	RCN1
SORBS2	3.32062e-110	-0.799099	0.086	0.3	8.52237e-106	HCs	SORBS2
RARRES2.1	3.15377e-114	-0.800567	0.064	0.277	8.09414e-110	HCs	RARRES2
AC009041.2.2	2.35185e-98	-0.801227	0.043	0.227	6.03602e-94	HCs	AC009041.2
TPI1.1	3.42408e-170	-0.803872	0.762	0.871	8.7879e-166	HCs	TPI1
TBX2-AS1.1	4.55643e-123	-0.804349	0.09	0.321	1.16941e-118	HCs	TBX2-AS1
FZD5.2	2.41367e-123	-0.808307	0.055	0.277	6.19469e-119	HCs	FZD5
FEZF2	4.55093e-120	-0.812691	0.081	0.307	1.168e-115	HCs	FEZF2
PLEKHA1.1	2.63016e-101	-0.81856	0.23	0.438	6.7503e-97	HCs	PLEKHA1
CRNDE.1	4.47912e-130	-0.820359	0.045	0.272	1.14957e-125	HCs	CRNDE
TAGLN2.1	4.3667e-130	-0.820521	0.069	0.303	1.12071e-125	HCs	TAGLN2
ANXA5	4.75798e-139	-0.822353	0.082	0.333	1.22114e-134	HCs	ANXA5
TMEM98.1	7.10467e-143	-0.83881	0.192	0.451	1.82341e-138	HCs	TMEM98
MCAM.2	9.42625e-107	-0.841528	0.022	0.209	2.41925e-102	HCs	MCAM
SMAD2.2	1.0888e-115	-0.844168	0.165	0.389	2.79441e-111	HCs	SMAD2
SYT1.1	5.53683e-108	-0.84567	0.546	0.701	1.42103e-103	HCs	SYT1
KDR.2	4.8672e-125	-0.848578	0.024	0.237	1.24917e-120	HCs	KDR
BHLHE22	8.01367e-97	-0.854122	0.03	0.206	2.05671e-92	HCs	BHLHE22
CA14.2	1.24518e-130	-0.856458	0.038	0.264	3.19576e-126	HCs	CA14
SSX2IP.1	2.97693e-110	-0.857712	0.044	0.244	7.64029e-106	HCs	SSX2IP
ZFHX4.2	2.55587e-86	-0.862382	0.043	0.211	6.55964e-82	HCs	ZFHX4
VSX2.2	1.25195e-139	-0.874424	0.036	0.272	3.21313e-135	HCs	VSX2
PTPRZ1.1	3.77657e-134	-0.878753	0.224	0.476	9.69256e-130	HCs	PTPRZ1
SPRY2.1	2.0633e-129	-0.881776	0.08	0.314	5.29547e-125	HCs	SPRY2
BSG.1	3.29394e-180	-0.885569	0.535	0.729	8.45391e-176	HCs	BSG
LGI4.2	4.3386e-139	-0.885885	0.039	0.279	1.1135e-134	HCs	LGI4
TOX3.2	2.87234e-121	-0.891501	0.195	0.424	7.37186e-117	HCs	TOX3
TUBA1B.2	4.49157e-117	-0.89238	0.675	0.765	1.15276e-112	HCs	TUBA1B
LGR4.1	1.97528e-143	-0.894697	0.238	0.496	5.06957e-139	HCs	LGR4
TRH.1	2.59552e-86	-0.899483	0.168	0.354	6.66139e-82	HCs	TRH
PBX1.1	3.65341e-112	-0.904402	0.212	0.437	9.37647e-108	HCs	PBX1
NEUROD4.3	2.02514e-23	-0.906699	0.128	0.2	5.19752e-19	HCs	NEUROD4
TBX2	4.64418e-145	-0.906718	0.128	0.39	1.19193e-140	HCs	TBX2
COL2A1.2	7.86866e-142	-0.908681	0.027	0.264	2.01949e-137	HCs	COL2A1
CSRP2.1	1.53574e-130	-0.910483	0.249	0.489	3.94149e-126	HCs	CSRP2
NFIB.1	2.35716e-123	-0.913859	0.044	0.262	6.04965e-119	HCs	NFIB
PCP4.2	1.03081e-13	-0.914609	0.102	0.154	2.64558e-09	HCs	PCP4
SMIM20.2	5.04697e-141	-0.926267	0.144	0.4	1.2953e-136	HCs	SMIM20
DDHD1.2	5.51096e-118	-0.936759	0.174	0.401	1.41439e-113	HCs	DDHD1
RBP1.2	6.92731e-191	-0.947476	0.759	0.864	1.77789e-186	HCs	RBP1
RTN4.2	1.40089e-293	-0.960869	0.827	0.92	3.59539e-289	HCs	RTN4
RGS16.1	2.47393e-57	-0.966535	0.471	0.569	6.34934e-53	HCs	RGS16
LDHA.1	5.12205e-251	-0.97522	0.657	0.844	1.31457e-246	HCs	LDHA
TFDP2	8.98743e-170	-0.97544	0.212	0.493	2.30662e-165	HCs	TFDP2
GNG5.1	1.35517e-178	-0.989081	0.304	0.57	3.47804e-174	HCs	GNG5
LINC01833.2	5.92756e-151	-0.994863	0.163	0.429	1.52131e-146	HCs	LINC01833
NOTCH1.1	4.04621e-177	-0.99837	0.049	0.337	1.03846e-172	HCs	NOTCH1
STON2.2	2.01997e-175	-1.00062	0.068	0.358	5.18426e-171	HCs	STON2
SLC1A3.2	6.6127e-153	-1.0035	0.033	0.284	1.69715e-148	HCs	SLC1A3
ILDR2.1	5.03726e-178	-1.00708	0.048	0.337	1.29281e-173	HCs	ILDR2
EGR1.2	3.33289e-61	-1.01142	0.18	0.325	8.55385e-57	HCs	EGR1
CRB1.1	1.06242e-182	-1.03063	0.06	0.353	2.7267e-178	HCs	CRB1
LIMCH1.2	4.44089e-160	-1.0358	0.032	0.292	1.13975e-155	HCs	LIMCH1
VCAN	6.28522e-176	-1.03619	0.033	0.315	1.6131e-171	HCs	VCAN
CCDC34.2	1.63713e-152	-1.04257	0.114	0.383	4.20169e-148	HCs	CCDC34
ID4.2	8.41564e-134	-1.04733	0.175	0.424	2.15987e-129	HCs	ID4
GATB.2	2.72211e-149	-1.05138	0.092	0.349	6.9863e-145	HCs	GATB
GNAI2.1	6.11949e-197	-1.05346	0.19	0.5	1.57057e-192	HCs	GNAI2
TMEM123.2	9.10867e-201	-1.06863	0.066	0.381	2.33774e-196	HCs	TMEM123
LHX2.2	4.03825e-196	-1.07993	0.075	0.385	1.03642e-191	HCs	LHX2
MYB.2	1.92731e-196	-1.10918	0.051	0.359	4.94644e-192	HCs	MYB
SOX9.3	3.19596e-174	-1.12374	0.216	0.502	8.20244e-170	HCs	SOX9
NR2F1	4.8e-205	-1.13383	0.195	0.513	1.23192e-200	HCs	NR2F1
BTG2.1	1.79429e-101	-1.13462	0.23	0.425	4.60504e-97	HCs	BTG2
CXCR4.2	1.08226e-179	-1.14871	0.112	0.404	2.77763e-175	HCs	CXCR4
GAS1.2	4.35749e-150	-1.16362	0.055	0.309	1.11835e-145	HCs	GAS1
PLP1.3	7.84668e-171	-1.16873	0.03	0.299	2.01385e-166	HCs	PLP1
MYO10.2	1.45179e-202	-1.18534	0.07	0.385	3.72601e-198	HCs	MYO10
QDPR.3	1.00666e-160	-1.21705	0.126	0.394	2.58358e-156	HCs	QDPR
CNN3.1	2.79025e-259	-1.22165	0.205	0.563	7.16118e-255	HCs	CNN3
LHX9.2	1.61655e-115	-1.22203	0.042	0.247	4.14887e-111	HCs	LHX9
PRSS35.3	2.44266e-161	-1.22586	0.021	0.277	6.2691e-157	HCs	PRSS35
ID3.3	8.20201e-69	-1.24706	0.196	0.351	2.10504e-64	HCs	ID3
MIAT.1	7.4413e-221	-1.2493	0.423	0.675	1.90981e-216	HCs	MIAT
C1orf61.2	4.40063e-139	-1.25653	0.043	0.278	1.12942e-134	HCs	C1orf61
SLC2A1.1	1.18186e-278	-1.28679	0.161	0.544	3.03324e-274	HCs	SLC2A1
FBXW7	7.72521e-265	-1.31634	0.185	0.555	1.98268e-260	HCs	FBXW7
IGFBP2.1	1.67153e-169	-1.321	0.319	0.579	4.28999e-165	HCs	IGFBP2
CDH2.1	0	-1.32228	0.198	0.611	0	HCs	CDH2
CADM1.2	9.4538e-268	-1.35162	0.172	0.545	2.42632e-263	HCs	CADM1
FXYD1.2	5.06072e-238	-1.35576	0.058	0.406	1.29883e-233	HCs	FXYD1
PMEPA1.3	2.09525e-261	-1.36049	0.253	0.599	5.37746e-257	HCs	PMEPA1
FABP7.3	2.49182e-229	-1.39125	0.245	0.574	6.39525e-225	HCs	FABP7
SELENOP.2	1.47379e-266	-1.42119	0.053	0.429	3.78249e-262	HCs	SELENOP
AL139246.5.1	9.67096e-160	-1.4869	0.059	0.321	2.48205e-155	HCs	AL139246.5
DAPL1.1	1.31436e-267	-1.52378	0.156	0.526	3.3733e-263	HCs	DAPL1
TCF4	1.557e-305	-1.54276	0.276	0.643	3.99604e-301	HCs	TCF4
HES6.1	6.11006e-125	-1.54739	0.266	0.482	1.56815e-120	HCs	HES6
CKB.2	0	-1.59348	0.959	0.981	0	HCs	CKB
FOS.3	1.03883e-132	-1.60311	0.602	0.711	2.66617e-128	HCs	FOS
GPM6B.2	0	-1.64737	0.163	0.606	0	HCs	GPM6B
ID1.3	1.59667e-256	-1.65532	0.121	0.482	4.09786e-252	HCs	ID1
HES4.3	5.7461e-272	-1.684	0.186	0.548	1.47474e-267	HCs	HES4
ASCL1.2	3.2788e-294	-1.68741	0.109	0.511	8.41505e-290	HCs	ASCL1
SAT1.3	1.15789e-143	-1.69425	0.213	0.454	2.97172e-139	HCs	SAT1
RAX.2	0	-1.71968	0.094	0.531	0	HCs	RAX
MEST.1	0	-1.71985	0.199	0.628	0	HCs	MEST
DKK3.2	0	-1.74343	0.202	0.657	0	HCs	DKK3
CLU.2	0	-1.74512	0.275	0.69	0	HCs	CLU
CYR61.3	1.22467e-247	-1.82841	0.049	0.398	3.14312e-243	HCs	CYR61
SFRP2.3	1.69377e-301	-1.89662	0.119	0.514	4.34706e-297	HCs	SFRP2
TF.3	3.89999e-204	-1.92249	0.054	0.364	1.00093e-199	HCs	TF
LINC00461.1	0	-1.94283	0.064	0.583	0	HCs	LINC00461
TTYH1.3	0	-1.98585	0.142	0.593	0	HCs	TTYH1
ZFP36L1.3	0	-2.037	0.113	0.568	0	HCs	ZFP36L1
MEIS2.3	3.34889e-177	-2.0878	0.06	0.345	8.59492e-173	HCs	MEIS2
SPP1.3	0	-2.11592	0.252	0.65	0	HCs	SPP1
ZFP36L2.3	0	-2.44788	0.172	0.647	0	HCs	ZFP36L2
CRABP1.1	0	-2.50326	0.704	0.983	0	HCs	CRABP1
SOX2.2	0	-2.50918	0.14	0.681	0	HCs	SOX2
HES1.3	0	-2.51969	0.143	0.569	0	HCs	HES1
HES5.2	9.33176e-247	-2.63427	0.134	0.476	2.395e-242	HCs	HES5
CCND1.2	0	-2.70334	0.198	0.656	0	HCs	CCND1
VIM.3	0	-2.80122	0.542	0.858	0	HCs	VIM
MEIS2.4	0	3.33336	0.803	0.212	0	ACs	MEIS2
TFAP2A.3	0	2.37099	0.756	0.222	0	ACs	TFAP2A
RND3.3	0	2.36476	0.692	0.221	0	ACs	RND3
PCP4.3	0	2.34748	0.373	0.102	0	ACs	PCP4
LMO4.2	2.06492e-279	2.21165	0.536	0.325	5.29961e-275	ACs	LMO4
RALYL.3	0	2.17944	0.463	0.058	0	ACs	RALYL
CELF4.2	0	1.93243	0.681	0.215	0	ACs	CELF4
LHX9.3	0	1.8924	0.52	0.163	0	ACs	LHX9
NRXN1.1	0	1.8642	0.617	0.115	0	ACs	NRXN1
ZFHX3.2	0	1.82411	0.533	0.151	0	ACs	ZFHX3
MIR181A1HG.2	0	1.82033	0.663	0.174	0	ACs	MIR181A1HG
GAD2.2	0	1.75079	0.538	0.082	0	ACs	GAD2
ZNF503.1	0	1.677	0.439	0.056	0	ACs	ZNF503
KIF5C.3	0	1.63914	0.679	0.277	0	ACs	KIF5C
TUBB2A.3	0	1.62343	0.825	0.457	0	ACs	TUBB2A
ZNF385D.2	0	1.61069	0.761	0.389	0	ACs	ZNF385D
ZFHX4.3	0	1.59626	0.463	0.136	0	ACs	ZFHX4
NTM.2	0	1.59552	0.528	0.143	0	ACs	NTM
RBFOX2.2	0	1.55784	0.696	0.26	0	ACs	RBFOX2
RTN1.3	0	1.55725	0.821	0.325	0	ACs	RTN1
SYT1.2	0	1.50866	0.879	0.644	0	ACs	SYT1
SCG5.3	0	1.49875	0.632	0.215	0	ACs	SCG5
PCDH9.3	0	1.47871	0.532	0.212	0	ACs	PCDH9
SCN2A.1	0	1.46248	0.456	0.059	0	ACs	SCN2A
RUNX1T1.3	0	1.44519	0.546	0.191	0	ACs	RUNX1T1
JPH4.1	0	1.44139	0.447	0.054	0	ACs	JPH4
TFAP2C.1	0	1.44091	0.337	0.077	0	ACs	TFAP2C
DCX.3	0	1.43196	0.576	0.154	0	ACs	DCX
ANK3.2	0	1.42632	0.548	0.174	0	ACs	ANK3
FAT3.1	0	1.42225	0.507	0.177	0	ACs	FAT3
RD3L	0	1.41456	0.322	0.018	0	ACs	RD3L
NSG1.3	0	1.40521	0.642	0.206	0	ACs	NSG1
PRDM8.1	0	1.38828	0.24	0.032	0	ACs	PRDM8
MIR124-2HG.2	0	1.34587	0.604	0.214	0	ACs	MIR124-2HG
BHLHE22.1	0	1.34343	0.398	0.143	0	ACs	BHLHE22
PBX1.2	0	1.33759	0.616	0.37	0	ACs	PBX1
PCSK1N.3	0	1.32695	0.748	0.351	0	ACs	PCSK1N
CADM2.2	0	1.32597	0.595	0.269	0	ACs	CADM2
SEZ6L2.1	0	1.28746	0.559	0.172	0	ACs	SEZ6L2
GRIA2.2	0	1.26419	0.448	0.113	0	ACs	GRIA2
CD24.4	0	1.26203	0.827	0.436	0	ACs	CD24
GNG3.1	0	1.2594	0.516	0.158	0	ACs	GNG3
TAGLN3.2	0	1.2563	0.769	0.433	0	ACs	TAGLN3
RPRM	0	1.25438	0.31	0.093	0	ACs	RPRM
TAC1	0	1.25102	0.192	0.026	0	ACs	TAC1
POU2F2.1	0	1.24969	0.364	0.047	0	ACs	POU2F2
PCLO	0	1.22763	0.445	0.175	0	ACs	PCLO
PRKCB.1	0	1.21674	0.315	0.063	0	ACs	PRKCB
NBEA	0	1.21635	0.566	0.252	0	ACs	NBEA
MLLT11.4	0	1.19311	0.794	0.473	0	ACs	MLLT11
INA.3	0	1.1922	0.642	0.26	0	ACs	INA
FEZ1.2	0	1.1903	0.558	0.227	0	ACs	FEZ1
CSRNP3.1	0	1.18321	0.529	0.214	0	ACs	CSRNP3
FARP1	0	1.17609	0.46	0.201	0	ACs	FARP1
ELAVL3.2	0	1.16154	0.616	0.265	0	ACs	ELAVL3
RELN	0	1.1508	0.281	0.058	0	ACs	RELN
DPYSL2.1	0	1.14269	0.689	0.462	0	ACs	DPYSL2
NRP1.1	0	1.14257	0.373	0.08	0	ACs	NRP1
NREP.3	0	1.13705	0.849	0.607	0	ACs	NREP
NRXN2.1	0	1.11973	0.396	0.111	0	ACs	NRXN2
KIDINS220.1	0	1.11633	0.614	0.347	0	ACs	KIDINS220
CPLX3.1	0	1.11477	0.312	0.057	0	ACs	CPLX3
TFAP2B.3	0	1.11364	0.532	0.239	0	ACs	TFAP2B
DLG2.1	0	1.10929	0.333	0.059	0	ACs	DLG2
CRMP1.2	0	1.10832	0.756	0.44	0	ACs	CRMP1
TTC3.1	0	1.09537	0.867	0.677	0	ACs	TTC3
AC004158.1	0	1.09399	0.215	0.021	0	ACs	AC004158.1
SNTG1	0	1.09112	0.246	0.008	0	ACs	SNTG1
PDGFRA	0	1.08979	0.188	0.03	0	ACs	PDGFRA
ELAVL4	0	1.08697	0.322	0.056	0	ACs	ELAVL4
SNAP25.1	0	1.07704	0.443	0.171	0	ACs	SNAP25
LHFPL6	0	1.07353	0.27	0.053	0	ACs	LHFPL6
CRABP1.2	0	1.06911	0.968	0.95	0	ACs	CRABP1
GAD1	0	1.06372	0.263	0.015	0	ACs	GAD1
PAX6.2	0	1.06311	0.951	0.889	0	ACs	PAX6
OLFM3	3.22492e-303	1.0584	0.221	0.048	8.27676e-299	ACs	OLFM3
DCC	0	1.05673	0.265	0.018	0	ACs	DCC
CELF5.1	0	1.05615	0.351	0.075	0	ACs	CELF5
RASGEF1B.1	0	1.05517	0.418	0.15	0	ACs	RASGEF1B
ARHGEF12.1	0	1.03978	0.478	0.189	0	ACs	ARHGEF12
APLP1.3	0	1.03763	0.555	0.244	0	ACs	APLP1
SRRM4.2	0	1.03729	0.46	0.185	0	ACs	SRRM4
CPE.1	0	1.03635	0.623	0.367	0	ACs	CPE
AP1S2.2	4.45566e-242	1.03394	0.512	0.288	1.14355e-237	ACs	AP1S2
MYT1L.1	0	1.03377	0.34	0.075	0	ACs	MYT1L
SV2A.1	0	1.03376	0.376	0.109	0	ACs	SV2A
PCBP3.1	0	1.02796	0.453	0.161	0	ACs	PCBP3
C1QL2	0	1.02536	0.14	0.004	0	ACs	C1QL2
CEP170.1	0	1.02147	0.616	0.356	0	ACs	CEP170
GRIA4.1	0	1.0211	0.585	0.319	0	ACs	GRIA4
MAPT.3	0	1.02013	0.466	0.15	0	ACs	MAPT
APC	0	1.01569	0.431	0.17	0	ACs	APC
NSG2.3	6.705e-280	1.01337	0.448	0.189	1.72084e-275	ACs	NSG2
LY6H	0	1.01033	0.347	0.103	0	ACs	LY6H
ADGRL3	0	1.00724	0.408	0.157	0	ACs	ADGRL3
PKIA.1	0	1.00699	0.548	0.286	0	ACs	PKIA
AC024610.2	0	1.00667	0.224	0.009	0	ACs	AC024610.2
RBFOX1	0	1.00368	0.277	0.041	0	ACs	RBFOX1
SH3BP5.1	0	1.00033	0.378	0.093	0	ACs	SH3BP5
FGF14	0	0.997347	0.249	0.02	0	ACs	FGF14
MAP2.1	0	0.995179	0.643	0.399	0	ACs	MAP2
PODXL2.1	0	0.974263	0.535	0.264	0	ACs	PODXL2
PPFIA2	0	0.974237	0.312	0.079	0	ACs	PPFIA2
KHDRBS3	3.83177e-225	0.972431	0.316	0.124	9.83425e-221	ACs	KHDRBS3
ATP1A3.1	0	0.966867	0.503	0.218	0	ACs	ATP1A3
GABRA2	0	0.966036	0.201	0.013	0	ACs	GABRA2
SLC38A1.1	0	0.963088	0.409	0.15	0	ACs	SLC38A1
VAMP2	0	0.950449	0.779	0.637	0	ACs	VAMP2
AUTS2.1	1.23236e-265	0.942778	0.421	0.186	3.16284e-261	ACs	AUTS2
AC027031.2	0	0.933745	0.281	0.073	0	ACs	AC027031.2
PCDH7	1.95145e-139	0.925048	0.328	0.173	5.00841e-135	ACs	PCDH7
RAB3A.2	0	0.924246	0.423	0.157	0	ACs	RAB3A
AL512380.1.4	0	0.916723	0.357	0.078	0	ACs	AL512380.1
SLC32A1	0	0.912826	0.294	0.055	0	ACs	SLC32A1
CADPS.1	7.12858e-238	0.911024	0.384	0.165	1.82955e-233	ACs	CADPS
BASP1.3	0	0.908131	0.89	0.742	0	ACs	BASP1
ENO2.1	4.44202e-276	0.905983	0.53	0.275	1.14004e-271	ACs	ENO2
AKAP9	5.53818e-253	0.903652	0.653	0.436	1.42137e-248	ACs	AKAP9
SYT6	0	0.897881	0.212	0.012	0	ACs	SYT6
IGFBP4	1.44598e-266	0.897534	0.24	0.064	3.7111e-262	ACs	IGFBP4
TBX3.1	3.93132e-223	0.89495	0.266	0.088	1.00897e-218	ACs	TBX3
CACNA1A	4.69236e-270	0.892443	0.285	0.088	1.20429e-265	ACs	CACNA1A
XIST	3.05329e-78	0.877099	0.476	0.364	7.83628e-74	ACs	XIST
UCHL1.1	8.17212e-218	0.87584	0.591	0.396	2.09737e-213	ACs	UCHL1
JPT1.2	0	0.872663	0.808	0.562	0	ACs	JPT1
PTPRK	2.95385e-192	0.871788	0.359	0.168	7.58107e-188	ACs	PTPRK
PARD3	1.53013e-150	0.862618	0.345	0.18	3.92708e-146	ACs	PARD3
CEP126	2.57471e-223	0.852958	0.375	0.164	6.60798e-219	ACs	CEP126
RGS8	0	0.848366	0.249	0.043	0	ACs	RGS8
FAM57B.1	6.82235e-256	0.848005	0.452	0.21	1.75096e-251	ACs	FAM57B
PLPPR1	8.45328e-235	0.844561	0.394	0.174	2.16954e-230	ACs	PLPPR1
TERF2IP.1	0	0.84355	0.803	0.635	0	ACs	TERF2IP
SOX4.3	0	0.831923	0.998	0.975	0	ACs	SOX4
THRA	6.0196e-218	0.821648	0.467	0.248	1.54493e-213	ACs	THRA
GABRG2	0	0.816998	0.209	0.016	0	ACs	GABRG2
DPYSL4.1	2.65376e-187	0.813785	0.465	0.269	6.81087e-183	ACs	DPYSL4
NRXN3.1	1.52769e-213	0.813432	0.34	0.14	3.92083e-209	ACs	NRXN3
SBK1.1	2.28583e-229	0.813245	0.418	0.195	5.86659e-225	ACs	SBK1
TCEAL2	8.52354e-238	0.812962	0.416	0.189	2.18757e-233	ACs	TCEAL2
SYP.1	1.66093e-207	0.807924	0.413	0.198	4.26276e-203	ACs	SYP
NEGR1	0	0.807886	0.21	0.018	0	ACs	NEGR1
MAP6	5.71377e-186	0.807159	0.47	0.271	1.46644e-181	ACs	MAP6
GAS7	0	0.806215	0.197	0.022	0	ACs	GAS7
TFAP2E	0	0.805154	0.145	0.007	0	ACs	TFAP2E
DPF3	0	0.805057	0.23	0.035	0	ACs	DPF3
SOBP	0	0.801932	0.257	0.06	0	ACs	SOBP
AC245297.3	0	0.801699	0.259	0.064	0	ACs	AC245297.3
BZW2.1	3.66942e-224	0.799724	0.541	0.312	9.41758e-220	ACs	BZW2
NNAT.1	0	0.796878	0.898	0.802	0	ACs	NNAT
NETO2	2.27222e-244	0.796606	0.227	0.062	5.83166e-240	ACs	NETO2
EDIL3	1.00603e-255	0.795619	0.245	0.068	2.58198e-251	ACs	EDIL3
SPOCK1	6.56713e-157	0.793309	0.214	0.076	1.68545e-152	ACs	SPOCK1
DPYSL3.1	4.79505e-233	0.791827	0.344	0.136	1.23065e-228	ACs	DPYSL3
MARCKSL1.2	0	0.790788	0.973	0.939	0	ACs	MARCKSL1
HIP1R	2.67471e-288	0.788972	0.255	0.066	6.86465e-284	ACs	HIP1R
KCNC1	0	0.788469	0.235	0.041	0	ACs	KCNC1
ADGRB3	8.95824e-223	0.788207	0.272	0.093	2.29913e-218	ACs	ADGRB3
TTC9B.2	5.86756e-242	0.785555	0.32	0.114	1.50591e-237	ACs	TTC9B
PEG3	3.95744e-172	0.783825	0.299	0.13	1.01568e-167	ACs	PEG3
CACNB4	0	0.782985	0.228	0.033	0	ACs	CACNB4
ZBTB38	8.93954e-237	0.782298	0.307	0.109	2.29433e-232	ACs	ZBTB38
GAP43	3.74446e-143	0.781408	0.364	0.199	9.61016e-139	ACs	GAP43
FRMD4A	3.88062e-178	0.779655	0.359	0.173	9.95961e-174	ACs	FRMD4A
STMN2.4	0	0.775057	0.955	0.588	0	ACs	STMN2
CRIM1	2.84228e-143	0.768517	0.222	0.086	7.29472e-139	ACs	CRIM1
ATCAY.1	9.49268e-230	0.76048	0.31	0.113	2.4363e-225	ACs	ATCAY
L1CAM.1	2.41168e-259	0.760383	0.278	0.084	6.18959e-255	ACs	L1CAM
AL391650.1.3	3.36583e-203	0.754553	0.612	0.387	8.63839e-199	ACs	AL391650.1
FIBCD1	6.41513e-233	0.749528	0.177	0.039	1.64644e-228	ACs	FIBCD1
HSPA12A	0	0.748906	0.202	0.032	0	ACs	HSPA12A
CTTNBP2	3.34002e-183	0.747502	0.276	0.107	8.57215e-179	ACs	CTTNBP2
CACNA1D	0	0.747343	0.2	0.024	0	ACs	CACNA1D
SCN3A	9.00007e-255	0.74712	0.256	0.074	2.30987e-250	ACs	SCN3A
TMEM59L	7.17923e-268	0.742791	0.255	0.07	1.84255e-263	ACs	TMEM59L
VPS41	2.97298e-126	0.733945	0.28	0.137	7.63015e-122	ACs	VPS41
CHD3	1.65974e-172	0.732886	0.326	0.149	4.25973e-168	ACs	CHD3
LUC7L3	2.06863e-250	0.732534	0.835	0.753	5.30915e-246	ACs	LUC7L3
GPR85.1	7.7927e-254	0.729452	0.251	0.07	2e-249	ACs	GPR85
KIF21A	8.32247e-157	0.728229	0.45	0.267	2.13596e-152	ACs	KIF21A
RTN3	1.64347e-196	0.72662	0.717	0.59	4.21797e-192	ACs	RTN3
STXBP1.1	2.19878e-175	0.722659	0.351	0.167	5.64316e-171	ACs	STXBP1
CDK5R1	4.93987e-174	0.720759	0.321	0.144	1.26782e-169	ACs	CDK5R1
CNTN1	1.88539e-200	0.720036	0.243	0.079	4.83885e-196	ACs	CNTN1
DNER	1.94498e-86	0.716155	0.333	0.21	4.99178e-82	ACs	DNER
PPP3CA	1.65358e-134	0.715883	0.362	0.199	4.24392e-130	ACs	PPP3CA
EEF1B2	5.23965e-182	0.714688	0.76	0.693	1.34476e-177	ACs	EEF1B2
GABPB1-AS1	4.31476e-147	0.710651	0.683	0.558	1.10738e-142	ACs	GABPB1-AS1
GNG2	2.72384e-226	0.710465	0.282	0.097	6.99074e-222	ACs	GNG2
EVL.2	1.11378e-153	0.708223	0.553	0.376	2.8585e-149	ACs	EVL
AFF3	1.46305e-211	0.707487	0.237	0.073	3.75492e-207	ACs	AFF3
NCAN	0	0.707139	0.21	0.04	0	ACs	NCAN
MYCBP2	2.34627e-134	0.705355	0.405	0.239	6.0217e-130	ACs	MYCBP2
WIPF3	0	0.703965	0.162	0.008	0	ACs	WIPF3
ARHGEF9	8.31636e-195	0.702279	0.289	0.112	2.13439e-190	ACs	ARHGEF9
CD200.1	2.46797e-175	0.701003	0.311	0.136	6.33404e-171	ACs	CD200
PTPRD	1.63641e-97	0.700435	0.319	0.187	4.19984e-93	ACs	PTPRD
RLBP1.2	3.04305e-137	-0.703568	0.015	0.175	7.80998e-133	ACs	RLBP1
SDCBP	5.62191e-204	-0.704015	0.065	0.317	1.44286e-199	ACs	SDCBP
CRYGD	4.16517e-208	-0.714372	0.046	0.29	1.06899e-203	ACs	CRYGD
PYGL.1	1.42929e-169	-0.71497	0.012	0.199	3.66828e-165	ACs	PYGL
CDK6.2	1.91101e-178	-0.720497	0.036	0.247	4.90462e-174	ACs	CDK6
REST.2	3.00567e-173	-0.720511	0.071	0.295	7.71405e-169	ACs	REST
RNF180.1	6.06799e-158	-0.723544	0.063	0.269	1.55735e-153	ACs	RNF180
SNRPG.1	5.00786e-263	-0.725235	0.536	0.795	1.28527e-258	ACs	SNRPG
GLUL	1.30752e-212	-0.729228	0.219	0.512	3.35576e-208	ACs	GLUL
PLEKHA1.2	1.38904e-159	-0.73651	0.213	0.457	3.56498e-155	ACs	PLEKHA1
RPS2	0	-0.738927	0.973	0.997	0	ACs	RPS2
NELL2.1	1.24324e-187	-0.741181	0.09	0.336	3.19076e-183	ACs	NELL2
CRB1.2	9.65705e-185	-0.746262	0.112	0.364	2.47848e-180	ACs	CRB1
TMEM37.3	4.89015e-180	-0.755474	0.015	0.215	1.25506e-175	ACs	TMEM37
TPT1	0	-0.758463	0.927	0.99	0	ACs	TPT1
LGR4.2	5.53766e-191	-0.758763	0.24	0.515	1.42124e-186	ACs	LGR4
SLC1A3.3	2.41793e-145	-0.761939	0.088	0.292	6.20562e-141	ACs	SLC1A3
WIF1.3	9.29055e-92	-0.762885	0.019	0.136	2.38442e-87	ACs	WIF1
MSI1.2	5.42286e-204	-0.763394	0.21	0.495	1.39178e-199	ACs	MSI1
BTG1.1	5.07942e-273	-0.76619	0.846	0.957	1.30363e-268	ACs	BTG1
ZBTB18.2	1.33136e-169	-0.766501	0.043	0.249	3.41692e-165	ACs	ZBTB18
ETV5.1	9.06356e-185	-0.766992	0.017	0.222	2.32616e-180	ACs	ETV5
TRPM3.2	7.35992e-175	-0.767535	0.065	0.291	1.88892e-170	ACs	TRPM3
TCF7L2.1	9.25853e-196	-0.769583	0.041	0.272	2.3762e-191	ACs	TCF7L2
TOX3.3	1.1679e-158	-0.775186	0.205	0.439	2.99742e-154	ACs	TOX3
ODC1.1	1.24323e-209	-0.780212	0.273	0.556	3.19074e-205	ACs	ODC1
DEK.1	6.09271e-213	-0.782445	0.386	0.657	1.56369e-208	ACs	DEK
HSPA1B.1	1.58259e-69	-0.783102	0.4	0.553	4.06172e-65	ACs	HSPA1B
SIX6	1.84565e-274	-0.783306	0.384	0.719	4.73686e-270	ACs	SIX6
TBX2-AS1.2	5.39538e-219	-0.783783	0.071	0.342	1.38472e-214	ACs	TBX2-AS1
PRDX6.1	2.02275e-224	-0.792688	0.153	0.442	5.19139e-220	ACs	PRDX6
GADD45G.2	3.21229e-68	-0.792919	0.182	0.319	8.24433e-64	ACs	GADD45G
AC009041.2.3	1.87133e-154	-0.793529	0.046	0.24	4.80277e-150	ACs	AC009041.2
FAM69C.2	4.65038e-205	-0.796109	0.014	0.235	1.19352e-200	ACs	FAM69C
ADAMTS6.3	3.98251e-203	-0.801549	0.011	0.228	1.02211e-198	ACs	ADAMTS6
CDKN1C.1	1.5455e-150	-0.802786	0.108	0.328	3.96652e-146	ACs	CDKN1C
ITGB8	2.23381e-218	-0.803996	0.03	0.275	5.73306e-214	ACs	ITGB8
KIAA1147.2	3.86801e-171	-0.811157	0.055	0.268	9.92725e-167	ACs	KIAA1147
TFDP2.1	1.3332e-211	-0.812581	0.228	0.511	3.42165e-207	ACs	TFDP2
SSX2IP.2	4.9941e-171	-0.819999	0.047	0.259	1.28174e-166	ACs	SSX2IP
JUNB.3	2.18587e-99	-0.820564	0.244	0.425	5.61003e-95	ACs	JUNB
DDHD1.3	1.12752e-163	-0.828456	0.179	0.417	2.89378e-159	ACs	DDHD1
B2M.2	4.09096e-230	-0.837071	0.061	0.331	1.04994e-225	ACs	B2M
TGIF1.1	5.84761e-232	-0.837891	0.021	0.27	1.50079e-227	ACs	TGIF1
CLGN.1	6.76494e-215	-0.838054	0.042	0.288	1.73622e-210	ACs	CLGN
CDC42EP4	3.47892e-226	-0.838454	0.226	0.523	8.92865e-222	ACs	CDC42EP4
EEF1D.1	0	-0.839199	0.482	0.772	0	ACs	EEF1D
LMAN1.2	1.03742e-237	-0.84082	0.181	0.483	2.66254e-233	ACs	LMAN1
RTN4.3	0	-0.844928	0.788	0.934	0	ACs	RTN4
NKAIN4	1.25697e-241	-0.851494	0.039	0.307	3.22601e-237	ACs	NKAIN4
FEZF2.1	1.30427e-229	-0.852285	0.06	0.328	3.3474e-225	ACs	FEZF2
CA14.3	1.31225e-199	-0.855991	0.046	0.279	3.3679e-195	ACs	CA14
OSTC.2	7.25866e-271	-0.862377	0.179	0.505	1.86294e-266	ACs	OSTC
CRNDE.2	1.38772e-228	-0.864813	0.036	0.291	3.5616e-224	ACs	CRNDE
RPS6.1	0	-0.875632	0.943	0.997	0	ACs	RPS6
RPS7	0	-0.879138	0.94	0.995	0	ACs	RPS7
KDR.3	3.26567e-208	-0.879974	0.023	0.253	8.38135e-204	ACs	KDR
VSX2.3	1.34872e-235	-0.887939	0.032	0.291	3.46148e-231	ACs	VSX2
ZIC2	2.29306e-254	-0.889115	0.142	0.454	5.88514e-250	ACs	ZIC2
GSTP1	0	-0.892635	0.412	0.748	0	ACs	GSTP1
SRI	1.14637e-304	-0.904416	0.128	0.477	2.94215e-300	ACs	SRI
ANXA5.1	2.43903e-272	-0.906817	0.057	0.357	6.25978e-268	ACs	ANXA5
RARRES2.2	1.4626e-239	-0.907458	0.035	0.299	3.75377e-235	ACs	RARRES2
CLIC1.1	5.66085e-275	-0.909954	0.034	0.326	1.45286e-270	ACs	CLIC1
FZD5.3	9.90965e-242	-0.912307	0.034	0.298	2.54331e-237	ACs	FZD5
SLC2A1.2	2.70006e-258	-0.922805	0.24	0.556	6.92971e-254	ACs	SLC2A1
MCAM.3	5.32917e-200	-0.92953	0.011	0.225	1.36773e-195	ACs	MCAM
DBI.1	1.05619e-293	-0.929868	0.261	0.598	2.71072e-289	ACs	DBI
TAGLN2.2	1.0004e-262	-0.931332	0.041	0.326	2.56752e-258	ACs	TAGLN2
RASD1.1	5.40968e-121	-0.936873	0.052	0.215	1.38839e-116	ACs	RASD1
NFIB.2	1.44562e-202	-0.937113	0.044	0.278	3.71019e-198	ACs	NFIB
TUBA1B.3	1.11409e-162	-0.937458	0.628	0.782	2.85932e-158	ACs	TUBA1B
PRSS23.2	2.78616e-234	-0.941618	0.022	0.273	7.15068e-230	ACs	PRSS23
RCN1.2	0	-0.943872	0.163	0.515	0	ACs	RCN1
NEUROD4.4	2.64592e-71	-0.948873	0.09	0.213	6.79075e-67	ACs	NEUROD4
BTG3	2.52059e-285	-0.949174	0.048	0.352	6.46909e-281	ACs	BTG3
TPPP3.2	2.27277e-248	-0.952822	0.028	0.294	5.83306e-244	ACs	TPPP3
ONECUT1.2	1.59821e-116	-0.960701	0.024	0.168	4.1018e-112	ACs	ONECUT1
PROX1.2	1.62848e-168	-0.963519	0.126	0.356	4.1795e-164	ACs	PROX1
COL2A1.3	1.61316e-245	-0.96571	0.022	0.283	4.14019e-241	ACs	COL2A1
DNAJB1.1	8.17524e-92	-0.975871	0.257	0.424	2.09818e-87	ACs	DNAJB1
FABP7.4	2.5888e-190	-0.991024	0.329	0.581	6.64416e-186	ACs	FABP7
STON2.3	3.96341e-268	-0.991201	0.077	0.378	1.01721e-263	ACs	STON2
GADD45A.3	1.53678e-141	-0.991262	0.086	0.282	3.94415e-137	ACs	GADD45A
METRN.3	2.14061e-228	-0.996023	0.143	0.424	5.49388e-224	ACs	METRN
LGI4.3	8.06172e-248	-1.00898	0.032	0.298	2.06904e-243	ACs	LGI4
BAMBI.4	2.79347e-225	-1.01474	0.094	0.364	7.16945e-221	ACs	BAMBI
ONECUT2.4	6.71618e-37	-1.01854	0.145	0.222	1.72371e-32	ACs	ONECUT2
GNAI2.2	0	-1.03625	0.178	0.526	0	ACs	GNAI2
ILDR2.2	2.9955e-291	-1.04313	0.05	0.358	7.68796e-287	ACs	ILDR2
C1orf61.3	1.40386e-150	-1.05768	0.086	0.286	3.603e-146	ACs	C1orf61
SMIM20.3	2.50172e-306	-1.06015	0.096	0.429	6.42066e-302	ACs	SMIM20
CSRP2.2	0	-1.06892	0.174	0.523	0	ACs	CSRP2
LIMCH1.3	9.35271e-266	-1.07338	0.031	0.311	2.40037e-261	ACs	LIMCH1
CREB5.2	4.17457e-287	-1.08086	0.017	0.305	1.0714e-282	ACs	CREB5
HSPA1A	1.4999e-90	-1.08865	0.55	0.68	3.8495e-86	ACs	HSPA1A
NOTCH1.2	0	-1.10124	0.031	0.363	0	ACs	NOTCH1
GATB.3	3.28125e-275	-1.12628	0.072	0.373	8.42132e-271	ACs	GATB
LINC01833.3	0	-1.13282	0.097	0.462	0	ACs	LINC01833
TMEM123.3	0	-1.15233	0.045	0.409	0	ACs	TMEM123
QDPR.4	1.67048e-235	-1.15465	0.134	0.413	4.28729e-231	ACs	QDPR
MYB.3	0	-1.15598	0.045	0.383	0	ACs	MYB
CMTM6.1	0	-1.18681	0.069	0.459	0	ACs	CMTM6
PLP1.4	6.00262e-281	-1.18757	0.03	0.32	1.54057e-276	ACs	PLP1
DUSP1.2	1.20225e-250	-1.19117	0.379	0.654	3.08557e-246	ACs	DUSP1
MYO10.3	0	-1.19487	0.066	0.409	0	ACs	MYO10
GAS1.3	4.40091e-258	-1.21971	0.049	0.329	1.12949e-253	ACs	GAS1
GPM6B.3	0	-1.23632	0.266	0.618	0	ACs	GPM6B
JUND.1	0	-1.26968	0.599	0.846	0	ACs	JUND
PRSS35.4	2.0801e-267	-1.27194	0.021	0.296	5.33859e-263	ACs	PRSS35
NES.2	0	-1.28773	0.044	0.427	0	ACs	NES
HSPB1	2.99599e-302	-1.30458	0.127	0.458	7.68922e-298	ACs	HSPB1
DAPL1.2	0	-1.30616	0.183	0.548	0	ACs	DAPL1
FXYD1.3	0	-1.31214	0.058	0.432	0	ACs	FXYD1
IER2.2	0	-1.34242	0.261	0.619	0	ACs	IER2
SOX9.4	0	-1.34322	0.16	0.535	0	ACs	SOX9
MDK.1	0	-1.38025	0.366	0.711	0	ACs	MDK
CNN3.2	0	-1.40617	0.137	0.604	0	ACs	CNN3
SELENOP.3	0	-1.41093	0.058	0.456	0	ACs	SELENOP
PTF1A.4	2.04829e-141	-1.42887	0.025	0.192	5.25695e-137	ACs	PTF1A
CXCR4.3	0	-1.43906	0.052	0.438	0	ACs	CXCR4
EGR1.3	1.70651e-251	-1.4538	0.079	0.357	4.37976e-247	ACs	EGR1
GNG5.2	0	-1.47603	0.114	0.63	0	ACs	GNG5
PMEPA1.4	0	-1.49048	0.214	0.633	0	ACs	PMEPA1
CKB.3	0	-1.50816	0.954	0.984	0	ACs	CKB
MEST.2	0	-1.5168	0.234	0.653	0	ACs	MEST
BTG2.2	0	-1.52803	0.112	0.464	0	ACs	BTG2
TCF4.1	0	-1.54468	0.188	0.689	0	ACs	TCF4
AL139246.5.2	2.72511e-287	-1.55874	0.045	0.344	6.99399e-283	ACs	AL139246.5
ID3.4	1.31151e-252	-1.6647	0.099	0.383	3.36599e-248	ACs	ID3
HES6.2	3.75631e-250	-1.70022	0.224	0.507	9.64057e-246	ACs	HES6
RGS16.2	0	-1.76503	0.239	0.624	0	ACs	RGS16
CLU.3	0	-1.78975	0.237	0.728	0	ACs	CLU
RAX.3	0	-1.8067	0.076	0.567	0	ACs	RAX
ID1.4	0	-1.81422	0.096	0.514	0	ACs	ID1
ASCL1.3	0	-1.85257	0.094	0.544	0	ACs	ASCL1
FOS.4	0	-1.85492	0.489	0.742	0	ACs	FOS
TF.4	7.79469e-304	-1.86058	0.068	0.384	2.00051e-299	ACs	TF
SAT1.4	0	-1.87877	0.147	0.485	0	ACs	SAT1
HES4.4	0	-1.8819	0.125	0.588	0	ACs	HES4
CYR61.4	0	-1.90686	0.045	0.425	0	ACs	CYR61
JUN.3	0	-1.98199	0.432	0.868	0	ACs	JUN
TTYH1.4	0	-2.06734	0.117	0.632	0	ACs	TTYH1
ZFP36L1.4	0	-2.15159	0.093	0.606	0	ACs	ZFP36L1
SFRP2.4	0	-2.20958	0.059	0.556	0	ACs	SFRP2
SPP1.4	0	-2.35886	0.157	0.699	0	ACs	SPP1
VIM.4	0	-2.70382	0.545	0.881	0	ACs	VIM
ZFP36L2.4	0	-2.72746	0.126	0.692	0	ACs	ZFP36L2
CCND1.3	0	-2.79998	0.202	0.69	0	ACs	CCND1
SOX2.3	0	-2.80763	0.1	0.73	0	ACs	SOX2
HES5.3	0	-2.86626	0.096	0.509	0	ACs	HES5
HES1.4	0	-2.90496	0.13	0.603	0	ACs	HES1

## Sheet: RPC-T1_T3_PR_BC
Pseudotime RPCs, T1, T3, PRs and BCs
	p_val	avg_log2FC	pct.1	pct.2	p_val_adj	cluster	gene
ATOH7	0	2.94524	0.478	0.101	0	T1	ATOH7
MIAT	0	2.52125	0.891	0.259	0	T1	MIAT
HES5	1.19275e-165	2.39136	0.398	0.147	3.0612e-161	T1	HES5
RGS16	0	2.29452	0.835	0.316	0	T1	RGS16
HES6	0	2.23579	0.95	0.568	0	T1	HES6
MDK	0	2.0836	0.81	0.29	0	T1	MDK
FAM131C	0	2.08083	0.633	0.097	0	T1	FAM131C
ASCL1	0	1.98369	0.694	0.214	0	T1	ASCL1
GADD45A	0	1.88492	0.645	0.261	0	T1	GADD45A
TRH	0	1.85569	0.443	0.08	0	T1	TRH
CCND1	1.7193e-149	1.83016	0.602	0.344	4.41259e-145	T1	CCND1
SOX2	0	1.7726	0.785	0.327	0	T1	SOX2
CXCR4	0	1.74846	0.61	0.127	0	T1	CXCR4
MYBL1	0	1.71956	0.593	0.092	0	T1	MYBL1
OLIG2	0	1.52374	0.46	0.027	0	T1	OLIG2
SH3BGRL3	2.08031e-276	1.51768	0.682	0.33	5.33913e-272	T1	SH3BGRL3
AL139246.5	1.96003e-98	1.49538	0.254	0.09	5.03043e-94	T1	AL139246.5
IGFBP2	1.44768e-276	1.48758	0.498	0.15	3.71547e-272	T1	IGFBP2
NEUROG2	0	1.47593	0.385	0.019	0	T1	NEUROG2
RORB	0	1.42608	0.988	0.869	0	T1	RORB
CRABP1	1.7016e-301	1.41428	0.948	0.725	4.36715e-297	T1	CRABP1
TCF4	0	1.39065	0.858	0.464	0	T1	TCF4
H1F0	3.0393e-280	1.37314	0.671	0.295	7.80038e-276	T1	H1F0
SPP1	4.39552e-217	1.31698	0.622	0.295	1.12811e-212	T1	SPP1
PFN2	4.96094e-247	1.30594	0.644	0.303	1.27323e-242	T1	PFN2
TFDP2	0	1.2962	0.699	0.291	0	T1	TFDP2
MEST	4.78003e-203	1.27863	0.617	0.304	1.22679e-198	T1	MEST
VIM	2.09118e-195	1.276	0.872	0.649	5.36701e-191	T1	VIM
STK39	0	1.2498	0.481	0.127	0	T1	STK39
PAX6	1.94389e-288	1.2416	0.735	0.356	4.98899e-284	T1	PAX6
LGR4	2.22608e-252	1.21945	0.507	0.174	5.71325e-248	T1	LGR4
RBP1	0	1.20492	0.975	0.8	0	T1	RBP1
VXN	5.38398e-191	1.19191	0.611	0.288	1.3818e-186	T1	VXN
DLL4	5.63823e-258	1.17982	0.496	0.164	1.44705e-253	T1	DLL4
CKB	0	1.17793	1	0.992	0	T1	CKB
NELL2	2.20386e-266	1.14771	0.678	0.31	5.65621e-262	T1	NELL2
SESN3	1.46088e-223	1.12964	0.48	0.163	3.74935e-219	T1	SESN3
FBXW7	4.92845e-197	1.11605	0.509	0.206	1.26489e-192	T1	FBXW7
EPHB2	3.5374e-271	1.10773	0.49	0.148	9.07874e-267	T1	EPHB2
PTH2	7.13119e-105	1.10515	0.204	0.056	1.83022e-100	T1	PTH2
SEMA5A	1.36837e-209	1.0671	0.448	0.149	3.51192e-205	T1	SEMA5A
TTC14	1.5439e-185	1.06521	0.63	0.336	3.96242e-181	T1	TTC14
LINC00461	1.34642e-187	1.06273	0.516	0.221	3.45558e-183	T1	LINC00461
RBPJ	1.13841e-234	1.03688	0.838	0.544	2.92174e-230	T1	RBPJ
PAK3	3.53317e-223	1.02644	0.524	0.193	9.06788e-219	T1	PAK3
TGFB2	0	1.0067	0.329	0.044	0	T1	TGFB2
DLL1	0	0.987382	0.275	0.027	0	T1	DLL1
NAP1L1	4.46501e-241	0.983465	0.914	0.693	1.14595e-236	T1	NAP1L1
ILDR2	2.59616e-229	0.977531	0.488	0.167	6.66306e-225	T1	ILDR2
CLU	4.51323e-148	0.974784	0.493	0.226	1.15832e-143	T1	CLU
SMIM20	7.88319e-178	0.970196	0.564	0.272	2.02322e-173	T1	SMIM20
FRYL	1.79751e-153	0.966314	0.559	0.287	4.6133e-149	T1	FRYL
TPPP3	4.0169e-198	0.954127	0.407	0.131	1.03094e-193	T1	TPPP3
GNG5	1.04567e-223	0.951305	0.864	0.598	2.68371e-219	T1	GNG5
CNN3	5.82905e-195	0.946062	0.667	0.353	1.49603e-190	T1	CNN3
ODC1	2.88829e-181	0.942504	0.778	0.518	7.41279e-177	T1	ODC1
SHD	3.78596e-253	0.939984	0.381	0.092	9.71666e-249	T1	SHD
NFIA	1.72402e-264	0.933183	0.295	0.049	4.4247e-260	T1	NFIA
SLITRK2	2.48525e-225	0.93074	0.365	0.092	6.37839e-221	T1	SLITRK2
PLEKHA1	4.01638e-109	0.930179	0.528	0.314	1.0308e-104	T1	PLEKHA1
PROX1	1.71369e-166	0.926768	0.463	0.178	4.39819e-162	T1	PROX1
HNRNPH3	5.05066e-207	0.909162	0.884	0.689	1.29625e-202	T1	HNRNPH3
CDK6	6.00103e-161	0.89062	0.376	0.13	1.54016e-156	T1	CDK6
TOX3	1.13343e-127	0.889752	0.565	0.312	2.90896e-123	T1	TOX3
SOX11	3.0252e-121	0.887899	0.748	0.531	7.76418e-117	T1	SOX11
E2F1	1.00411e-287	0.872551	0.278	0.038	2.57706e-283	T1	E2F1
HES1	1.94884e-30	0.868309	0.304	0.196	5.00169e-26	T1	HES1
UBE2S	6.12134e-37	0.857022	0.574	0.463	1.57104e-32	T1	UBE2S
RCOR2	4.11424e-161	0.856635	0.492	0.207	1.05592e-156	T1	RCOR2
GRID2	9.57798e-157	0.856631	0.391	0.139	2.45819e-152	T1	GRID2
HSPB1	5.21669e-89	0.854619	0.508	0.29	1.33886e-84	T1	HSPB1
VSTM2B	1.43259e-187	0.845073	0.294	0.07	3.67673e-183	T1	VSTM2B
MFAP4	4.2572e-120	0.841887	0.367	0.148	1.09261e-115	T1	MFAP4
SMAD2	7.27852e-128	0.840487	0.726	0.49	1.86803e-123	T1	SMAD2
GLUL	3.86214e-142	0.836974	0.634	0.366	9.91219e-138	T1	GLUL
NKAIN4	1.47539e-209	0.833398	0.34	0.084	3.78659e-205	T1	NKAIN4
TBX3	7.81001e-273	0.829381	0.276	0.04	2.00444e-268	T1	TBX3
DNAJB1	1.01091e-26	0.827116	0.448	0.349	2.5945e-22	T1	DNAJB1
TMSB15A	8.76428e-138	0.822246	0.665	0.412	2.24935e-133	T1	TMSB15A
ZBTB18	3.26477e-115	0.81793	0.509	0.27	8.37902e-111	T1	ZBTB18
ZFP36L1	4.49275e-95	0.814143	0.382	0.182	1.15306e-90	T1	ZFP36L1
CSRP2	6.83123e-202	0.8123	0.792	0.437	1.75324e-197	T1	CSRP2
MYO10	3.42822e-140	0.805554	0.442	0.192	8.79853e-136	T1	MYO10
TMEM123	4.8345e-137	0.804925	0.631	0.364	1.24077e-132	T1	TMEM123
LIMD2	2.66639e-195	0.802205	0.403	0.126	6.84328e-191	T1	LIMD2
NOTCH1	2.19002e-148	0.801611	0.423	0.17	5.62069e-144	T1	NOTCH1
LCA5	7.06055e-106	0.801519	0.431	0.214	1.81209e-101	T1	LCA5
TEAD2	1.97708e-292	0.792168	0.303	0.046	5.07418e-288	T1	TEAD2
PCSK2	1.41188e-142	0.786649	0.34	0.115	3.6236e-138	T1	PCSK2
GAS1	1.71617e-111	0.785039	0.276	0.093	4.40455e-107	T1	GAS1
DDX5	7.68099e-172	0.783801	0.92	0.765	1.97133e-167	T1	DDX5
MGARP	2.40475e-134	0.782284	0.574	0.308	6.17178e-130	T1	MGARP
ALDH7A1	4.56138e-77	0.782164	0.517	0.331	1.17068e-72	T1	ALDH7A1
PTPRG	3.3566e-149	0.781216	0.395	0.147	8.61472e-145	T1	PTPRG
INSM1	1.2969e-84	0.777563	0.633	0.438	3.32849e-80	T1	INSM1
FEZF2	2.99697e-234	0.77454	0.485	0.142	7.69172e-230	T1	FEZF2
KREMEN1	3.39416e-172	0.771543	0.317	0.088	8.71112e-168	T1	KREMEN1
CBFA2T2	4.84183e-127	0.766215	0.472	0.224	1.24266e-122	T1	CBFA2T2
RBM3	2.68347e-135	0.763642	0.67	0.409	6.88712e-131	T1	RBM3
BASP1	8.30156e-153	0.758549	0.844	0.592	2.13059e-148	T1	BASP1
RGR	1.39089e-144	0.75769	0.219	0.049	3.56972e-140	T1	RGR
SFRP2	3.82254e-118	0.754329	0.354	0.14	9.81054e-114	T1	SFRP2
ITGB1	1.75169e-147	0.750698	0.472	0.203	4.49572e-143	T1	ITGB1
DBI	4.09882e-91	0.749026	0.623	0.427	1.05196e-86	T1	DBI
ANXA5	4.15163e-99	0.744843	0.477	0.26	1.06552e-94	T1	ANXA5
TMEM98	5.77935e-129	0.744225	0.507	0.255	1.48327e-124	T1	TMEM98
RCN1	1.10871e-131	0.741738	0.551	0.286	2.84551e-127	T1	RCN1
ZC3H12C	8.12836e-229	0.735026	0.272	0.048	2.08614e-224	T1	ZC3H12C
ADAMTS18	4.1536e-200	0.730496	0.251	0.047	1.06602e-195	T1	ADAMTS18
CCDC34	7.14789e-38	0.730338	0.419	0.303	1.83451e-33	T1	CCDC34
EFNB2	1.00569e-91	0.72759	0.343	0.151	2.5811e-87	T1	EFNB2
WSB1	1.81247e-128	0.72657	0.848	0.642	4.6517e-124	T1	WSB1
ATP1B3	2.55786e-174	0.724719	0.335	0.096	6.56476e-170	T1	ATP1B3
HSPA1A	5.43489e-17	0.723088	0.624	0.602	1.39486e-12	T1	HSPA1A
RNF180	9.90674e-151	0.722715	0.264	0.069	2.54257e-146	T1	RNF180
PTTG1	3.63689e-35	0.719354	0.18	0.087	9.33409e-31	T1	PTTG1
MEG3	1.71588e-101	0.718927	0.586	0.332	4.40381e-97	T1	MEG3
MFNG	1.30513e-105	0.716408	0.497	0.267	3.34961e-101	T1	MFNG
PON2	2.52475e-201	0.709499	0.291	0.064	6.47978e-197	T1	PON2
MSI2	2.23644e-96	0.70716	0.651	0.437	5.73982e-92	T1	MSI2
DOK5	5.2788e-177	0.704582	0.22	0.04	1.3548e-172	T1	DOK5
FGD4	4.76547e-93	0.702185	0.43	0.223	1.22306e-88	T1	FGD4
KLHDC8A	2.35662e-76	0.70061	0.401	0.22	6.04828e-72	T1	KLHDC8A
ROGDI	4.81481e-85	-0.701928	0.145	0.403	1.23572e-80	T1	ROGDI
SEC62	8.7719e-104	-0.704079	0.647	0.794	2.25131e-99	T1	SEC62
PCBP4	7.09684e-170	-0.708834	0.762	0.934	1.8214e-165	T1	PCBP4
GPR160	3.12713e-72	-0.709804	0.011	0.19	8.02578e-68	T1	GPR160
NME3	7.58558e-88	-0.710079	0.136	0.397	1.94684e-83	T1	NME3
CA10	2.75526e-50	-0.71059	0.028	0.169	7.07139e-46	T1	CA10
LPCAT1	5.93257e-94	-0.710965	0.049	0.291	1.52259e-89	T1	LPCAT1
PGRMC2	1.4464e-67	-0.711829	0.431	0.607	3.71219e-63	T1	PGRMC2
UQCC2	1.97465e-74	-0.712539	0.407	0.606	5.06793e-70	T1	UQCC2
IQSEC1	2.33298e-87	-0.712573	0.061	0.297	5.98759e-83	T1	IQSEC1
TPI1	8.99833e-140	-0.713785	0.85	0.925	2.30942e-135	T1	TPI1
KCNQ1OT1	3.75324e-51	-0.714325	0.297	0.486	9.63268e-47	T1	KCNQ1OT1
PHPT1	1.79656e-81	-0.715125	0.243	0.489	4.61087e-77	T1	PHPT1
GPR180	9.58556e-90	-0.71821	0.06	0.299	2.46013e-85	T1	GPR180
PRDM8	1.76758e-27	-0.722505	0.059	0.158	4.53649e-23	T1	PRDM8
CPLX4	1.95599e-73	-0.732975	0.015	0.199	5.02005e-69	T1	CPLX4
ATP5F1A	1.07648e-92	-0.739403	0.666	0.752	2.76279e-88	T1	ATP5F1A
ZBTB7A	1.12837e-75	-0.74117	0.143	0.373	2.89595e-71	T1	ZBTB7A
NUDT14	3.86265e-92	-0.747516	0.09	0.342	9.9135e-88	T1	NUDT14
YPEL3	6.41078e-104	-0.748873	0.465	0.692	1.64533e-99	T1	YPEL3
AC027031.2	4.39874e-70	-0.749421	0.103	0.315	1.12894e-65	T1	AC027031.2
SLC1A2	3.76916e-80	-0.749824	0.037	0.247	9.67356e-76	T1	SLC1A2
CLSTN3	1.0706e-103	-0.751833	0.077	0.347	2.7477e-99	T1	CLSTN3
NEUROD4	2.68831e-113	-0.753107	0.675	0.857	6.89954e-109	T1	NEUROD4
CDK5R2	5.89651e-99	-0.758313	0.046	0.293	1.51334e-94	T1	CDK5R2
CDHR1	8.86155e-98	-0.759829	0.059	0.314	2.27432e-93	T1	CDHR1
RORA	6.99203e-87	-0.76163	0.164	0.423	1.7945e-82	T1	RORA
FAM213A	1.11312e-76	-0.762779	0.304	0.517	2.85683e-72	T1	FAM213A
ZFHX4	6.73277e-34	-0.764098	0.078	0.199	1.72797e-29	T1	ZFHX4
DNM1	1.74714e-97	-0.764858	0.052	0.299	4.48402e-93	T1	DNM1
IGSF21	1.21952e-79	-0.765887	0.027	0.23	3.1299e-75	T1	IGSF21
TMEM108	1.12038e-101	-0.772676	0.04	0.29	2.87544e-97	T1	TMEM108
PNPLA3	6.29301e-104	-0.776096	0.081	0.353	1.6151e-99	T1	PNPLA3
BCL2L1	1.49135e-91	-0.780567	0.162	0.422	3.82756e-87	T1	BCL2L1
LRRC4C	2.143e-77	-0.782628	0.127	0.363	5.50001e-73	T1	LRRC4C
CADM2	1.82073e-107	-0.783582	0.447	0.693	4.67291e-103	T1	CADM2
BAD	6.80985e-99	-0.784132	0.27	0.551	1.74775e-94	T1	BAD
NIPAL1	2.06607e-88	-0.784565	0.011	0.222	5.30257e-84	T1	NIPAL1
CPLX3	5.06796e-77	-0.786954	0.083	0.308	1.30069e-72	T1	CPLX3
AGAP1	3.31374e-94	-0.793459	0.225	0.495	8.50473e-90	T1	AGAP1
INHBB	8.57815e-103	-0.794935	0.021	0.265	2.20158e-98	T1	INHBB
PIK3R1	5.64437e-110	-0.796517	0.549	0.777	1.44863e-105	T1	PIK3R1
LBH	1.07117e-91	-0.799063	0.163	0.429	2.74915e-87	T1	LBH
TMX4	6.60635e-89	-0.80882	0.175	0.428	1.69552e-84	T1	TMX4
PODXL2	4.8111e-102	-0.812783	0.212	0.492	1.23477e-97	T1	PODXL2
REEP6	8.36031e-100	-0.816269	0.054	0.305	2.14567e-95	T1	REEP6
GRM6	1.26701e-111	-0.821482	0.022	0.283	3.25178e-107	T1	GRM6
CNGB1	5.14199e-84	-0.824184	0.016	0.222	1.31969e-79	T1	CNGB1
APLP1	1.09878e-98	-0.832346	0.12	0.386	2.82001e-94	T1	APLP1
ARL4C	4.06842e-94	-0.853769	0.224	0.488	1.04416e-89	T1	ARL4C
ARL6	2.34373e-113	-0.858382	0.088	0.374	6.01519e-109	T1	ARL6
CITED2	5.48268e-85	-0.860996	0.217	0.467	1.40713e-80	T1	CITED2
MCC	2.90536e-104	-0.867361	0.045	0.302	7.4566e-100	T1	MCC
LHX3	5.52745e-107	-0.870708	0.02	0.272	1.41862e-102	T1	LHX3
PDE6B	4.3152e-110	-0.878196	0.064	0.339	1.1075e-105	T1	PDE6B
PTMS	4.1348e-238	-0.879903	0.865	0.944	1.0612e-233	T1	PTMS
TPD52	7.51657e-98	-0.88167	0.142	0.417	1.92913e-93	T1	TPD52
VAMP2	4.53001e-169	-0.884986	0.675	0.831	1.16263e-164	T1	VAMP2
ITSN1	5.51755e-107	-0.885101	0.182	0.469	1.41608e-102	T1	ITSN1
UBXN4	4.38419e-147	-0.896703	0.622	0.8	1.1252e-142	T1	UBXN4
MAOA	5.79205e-132	-0.904383	0.024	0.32	1.48653e-127	T1	MAOA
LMO4	7.72852e-62	-0.914823	0.179	0.381	1.98352e-57	T1	LMO4
ARL6IP5	1.04857e-108	-0.91716	0.18	0.464	2.69116e-104	T1	ARL6IP5
CABP2	2.57276e-122	-0.918936	0.024	0.305	6.603e-118	T1	CABP2
DUSP26	6.06765e-133	-0.922839	0.107	0.43	1.55726e-128	T1	DUSP26
MIR124-2HG	1.76891e-95	-0.927223	0.148	0.412	4.5399e-91	T1	MIR124-2HG
IMPG1	1.78653e-101	-0.937126	0.008	0.242	4.58512e-97	T1	IMPG1
HIST1H1C	5.08423e-87	-0.9402	0.404	0.617	1.30487e-82	T1	HIST1H1C
NEUROD1	1.09382e-191	-0.944907	0.823	0.922	2.8073e-187	T1	NEUROD1
EYS	2.79723e-128	-0.952803	0.019	0.306	7.1791e-124	T1	EYS
SLC6A17	7.2359e-123	-0.974675	0.018	0.297	1.85709e-118	T1	SLC6A17
ADGRV1	2.62775e-120	-0.977574	0.119	0.42	6.74412e-116	T1	ADGRV1
MATK	1.62064e-124	-0.980629	0.025	0.31	4.15937e-120	T1	MATK
MEIS2	5.9498e-125	-0.982284	0.199	0.513	1.52702e-120	T1	MEIS2
MAP1LC3B	2.85127e-136	-0.984925	0.53	0.733	7.31779e-132	T1	MAP1LC3B
CDKN1C	1.28471e-90	-1.00805	0.322	0.56	3.2972e-86	T1	CDKN1C
PDE4DIP	2.99536e-123	-1.01638	0.052	0.342	7.68758e-119	T1	PDE4DIP
GNB5	8.80325e-141	-1.01716	0.077	0.404	2.25935e-136	T1	GNB5
ABHD14A	6.92403e-162	-1.03807	0.162	0.528	1.77705e-157	T1	ABHD14A
ZNF385B	8.5093e-147	-1.03889	0.064	0.4	2.18391e-142	T1	ZNF385B
PKM	1.32657e-136	-1.05247	0.73	0.839	3.40464e-132	T1	PKM
PLEKHB1	2.96191e-114	-1.05799	0.123	0.41	7.60174e-110	T1	PLEKHB1
NSG2	9.70238e-125	-1.05938	0.067	0.364	2.49012e-120	T1	NSG2
PAG1	2.90885e-138	-1.06947	0.052	0.369	7.46556e-134	T1	PAG1
CAMK2B	4.30524e-156	-1.07213	0.085	0.437	1.10494e-151	T1	CAMK2B
AMER2	6.22203e-173	-1.07362	0.639	0.829	1.59688e-168	T1	AMER2
PRDX1	2.90653e-205	-1.09202	0.658	0.838	7.45961e-201	T1	PRDX1
CHRNA3	3.66576e-143	-1.09253	0.206	0.537	9.40818e-139	T1	CHRNA3
LAPTM4B	1.05526e-152	-1.09299	0.354	0.65	2.70833e-148	T1	LAPTM4B
PRNP	5.82326e-163	-1.09884	0.128	0.491	1.49454e-158	T1	PRNP
SYP	3.92514e-207	-1.10995	0.404	0.76	1.00739e-202	T1	SYP
SEZ6L2	4.7127e-179	-1.11238	0.169	0.554	1.20951e-174	T1	SEZ6L2
PRDM1	1.02768e-136	-1.13394	0.262	0.585	2.63755e-132	T1	PRDM1
PTPN13	5.84664e-134	-1.13803	0.099	0.411	1.50054e-129	T1	PTPN13
MYO9A	1.41019e-130	-1.13869	0.101	0.411	3.61926e-126	T1	MYO9A
CRX	7.6976e-195	-1.13903	0.342	0.715	1.97559e-190	T1	CRX
MAK	3.92458e-155	-1.14362	0.044	0.382	1.00724e-150	T1	MAK
PDE6H	3.35555e-32	-1.15528	0.036	0.14	8.61202e-28	T1	PDE6H
AANAT	9.43347e-167	-1.15893	0.06	0.418	2.4211e-162	T1	AANAT
ENO2	2.15619e-177	-1.18644	0.188	0.564	5.53387e-173	T1	ENO2
PTP4A3	8.29143e-180	-1.19488	0.128	0.513	2.12799e-175	T1	PTP4A3
ISOC1	2.9112e-140	-1.21117	0.072	0.389	7.4716e-136	T1	ISOC1
GNGT2	1.21002e-145	-1.21784	0.031	0.351	3.10552e-141	T1	GNGT2
GUK1	1.49319e-190	-1.22893	0.433	0.723	3.83228e-186	T1	GUK1
CABP5	2.95499e-131	-1.23712	0.016	0.307	7.58399e-127	T1	CABP5
MPP4	2.68677e-138	-1.23719	0.017	0.32	6.8956e-134	T1	MPP4
SLC40A1	3.06145e-164	-1.24963	0.036	0.385	7.85722e-160	T1	SLC40A1
EPS8	2.65526e-170	-1.27684	0.072	0.435	6.81472e-166	T1	EPS8
PPFIA2	4.60321e-204	-1.2807	0.066	0.477	1.18141e-199	T1	PPFIA2
SAMD11	4.75514e-168	-1.29728	0.312	0.64	1.22041e-163	T1	SAMD11
SLC38A5	4.2435e-190	-1.29979	0.125	0.525	1.08909e-185	T1	SLC38A5
AKAP9	5.63774e-223	-1.30727	0.356	0.71	1.44693e-218	T1	AKAP9
RIMS2	1.47848e-174	-1.3077	0.058	0.426	3.79452e-170	T1	RIMS2
LINC00599	4.86331e-235	-1.31347	0.316	0.72	1.24817e-230	T1	LINC00599
SLC17A7	4.47872e-228	-1.32001	0.06	0.503	1.14946e-223	T1	SLC17A7
TMEM244	3.37837e-186	-1.33029	0.023	0.401	8.6706e-182	T1	TMEM244
RBP3	8.3836e-177	-1.33541	0.059	0.432	2.15165e-172	T1	RBP3
LOXL1	1.87375e-157	-1.33549	0.277	0.584	4.80897e-153	T1	LOXL1
GNG13	1.31194e-182	-1.34331	0.028	0.401	3.36708e-178	T1	GNG13
VSX1	6.5913e-11	-1.34393	0.125	0.18	1.69166e-06	T1	VSX1
KCNV2	5.15743e-161	-1.36298	0.018	0.358	1.32365e-156	T1	KCNV2
FAM57B	7.65805e-194	-1.36338	0.199	0.579	1.96544e-189	T1	FAM57B
GSTP1	0	-1.3708	0.786	0.945	0	T1	GSTP1
SNAP25	9.16529e-254	-1.37441	0.202	0.652	2.35227e-249	T1	SNAP25
PCP2	2.29811e-43	-1.37563	0.028	0.154	5.8981e-39	T1	PCP2
ANKRD33B	5.69686e-196	-1.38104	0.102	0.499	1.4621e-191	T1	ANKRD33B
SLC1A7	6.9041e-245	-1.4033	0.114	0.573	1.77194e-240	T1	SLC1A7
RRAD	1.52453e-122	-1.44847	0.063	0.353	3.91271e-118	T1	RRAD
ATP1A3	4.00003e-298	-1.45939	0.262	0.723	1.02661e-293	T1	ATP1A3
TMEM91	3.39125e-209	-1.4705	0.078	0.49	8.70365e-205	T1	TMEM91
ARL4D	3.89326e-161	-1.48646	0.219	0.556	9.99205e-157	T1	ARL4D
MRLN	4.81272e-211	-1.4997	0.048	0.459	1.23518e-206	T1	MRLN
GNAT1	6.63912e-146	-1.50061	0.02	0.337	1.70393e-141	T1	GNAT1
STX3	6.94228e-264	-1.50619	0.044	0.526	1.78174e-259	T1	STX3
2001-03-01	1.56251e-244	-1.54331	0.061	0.516	4.01019e-240	T1	2001-03-01
FAM161A	6.31981e-274	-1.57789	0.352	0.734	1.62198e-269	T1	FAM161A
IMPG2	5.65346e-250	-1.70111	0.035	0.497	1.45096e-245	T1	IMPG2
TULP1	3.32955e-300	-1.74827	0.078	0.588	8.54528e-296	T1	TULP1
BTBD8	9.10542e-261	-1.75942	0.109	0.573	2.33691e-256	T1	BTBD8
FSTL5	3.22294e-306	-1.76549	0.086	0.604	8.27168e-302	T1	FSTL5
ATP1B2	0	-1.77994	0.328	0.802	0	T1	ATP1B2
CADPS	1.72404e-301	-1.79625	0.175	0.664	4.42475e-297	T1	CADPS
EPB41L2	3.80344e-285	-1.82632	0.178	0.643	9.76154e-281	T1	EPB41L2
FABP7	8.83241e-214	-1.83841	0.614	0.85	2.26684e-209	T1	FABP7
UNC119	0	-1.8657	0.188	0.684	0	T1	UNC119
CPE	0	-1.95173	0.409	0.88	0	T1	CPE
RAX2	9.29698e-260	-1.95277	0.05	0.523	2.38607e-255	T1	RAX2
NTM	2.53426e-272	-2.06912	0.055	0.543	6.50418e-268	T1	NTM
DCT	3.62021e-204	-2.3007	0.073	0.478	9.29126e-200	T1	DCT
AL451062.1	0	-2.33251	0.167	0.657	0	T1	AL451062.1
NR2E3	2.84444e-294	-2.38501	0.062	0.567	7.30026e-290	T1	NR2E3
RP1	2.93622e-299	-2.41108	0.042	0.555	7.5358e-295	T1	RP1
CRABP2	1.17733e-296	-2.53338	0.106	0.6	3.02163e-292	T1	CRABP2
ROM1	0	-2.71008	0.115	0.715	0	T1	ROM1
PDC	0	-3.17359	0.136	0.712	0	T1	PDC
GNB3	0	-3.2637	0.196	0.882	0	T1	GNB3
AIPL1	0	-3.35288	0.158	0.779	0	T1	AIPL1
NRL	0	-3.38658	0.418	0.867	0	T1	NRL
RCVRN	0	-3.91542	0.347	0.841	0	T1	RCVRN
PHLDA1	1.18709e-295	2.50785	0.751	0.158	3.04667e-291	cone precursors	PHLDA1
C11orf96	6.43544e-119	2.37339	0.697	0.293	1.65166e-114	cone precursors	C11orf96
DCT.1	3.86068e-216	2.32639	0.932	0.407	9.90843e-212	cone precursors	DCT
S100A6	1.55542e-243	2.309	0.814	0.231	3.99199e-239	cone precursors	S100A6
THRB	0	2.16473	0.803	0.135	0	cone precursors	THRB
DLL3	6.7551e-160	2.00747	0.801	0.331	1.7337e-155	cone precursors	DLL3
SNCG	8.45057e-161	1.9909	0.517	0.118	2.16884e-156	cone precursors	SNCG
SERPINI2	0	1.85938	0.413	0.003	0	cone precursors	SERPINI2
MIR7-3HG	9.66011e-186	1.79083	0.749	0.237	2.47927e-181	cone precursors	MIR7-3HG
CHRNA5	0	1.70406	0.544	0.048	0	cone precursors	CHRNA5
S100A13	2.2417e-179	1.66989	0.541	0.114	5.75332e-175	cone precursors	S100A13
STMN2	2.45181e-123	1.59534	0.895	0.553	6.29256e-119	cone precursors	STMN2
RIMS1	0	1.59454	0.581	0.068	0	cone precursors	RIMS1
BHMT	0	1.57392	0.417	0.019	0	cone precursors	BHMT
STMN4	2.30814e-36	1.54605	0.404	0.2	5.92384e-32	cone precursors	STMN4
AC010247.2	0	1.52519	0.48	0.017	0	cone precursors	AC010247.2
PRDM1.1	1.54506e-145	1.4618	0.941	0.528	3.9654e-141	cone precursors	PRDM1
NRXN1	1.78787e-111	1.37699	0.677	0.275	4.58857e-107	cone precursors	NRXN1
PHACTR2	6.72106e-200	1.36172	0.522	0.095	1.72496e-195	cone precursors	PHACTR2
SYT4	4.99787e-97	1.35003	0.611	0.243	1.2827e-92	cone precursors	SYT4
GNAS	1.6254e-106	1.32757	0.956	0.766	4.1716e-102	cone precursors	GNAS
ONECUT3	0	1.26708	0.4	0.019	0	cone precursors	ONECUT3
PEG10	3.94719e-85	1.25347	0.528	0.191	1.01305e-80	cone precursors	PEG10
ONECUT1	5.21385e-220	1.24168	0.496	0.075	1.33814e-215	cone precursors	ONECUT1
CLIC1	2.92893e-84	1.23214	0.465	0.151	7.51709e-80	cone precursors	CLIC1
PPP1R14A	9.50185e-60	1.23166	0.277	0.075	2.43865e-55	cone precursors	PPP1R14A
SHOX2	0	1.21322	0.306	0.002	0	cone precursors	SHOX2
JUND	1.05836e-67	1.19938	0.906	0.763	2.71628e-63	cone precursors	JUND
PCAT4	1.21558e-104	1.19882	0.371	0.083	3.11979e-100	cone precursors	PCAT4
CLU.1	2.18562e-52	1.18035	0.524	0.25	5.60939e-48	cone precursors	CLU
SHC2	3.23532e-173	1.16557	0.369	0.052	8.30344e-169	cone precursors	SHC2
FAM57B.1	2.00836e-90	1.16037	0.854	0.517	5.15445e-86	cone precursors	FAM57B
GRIA2	2.53687e-188	1.13616	0.428	0.063	6.51087e-184	cone precursors	GRIA2
MTRNR2L12	1.05951e-67	1.11082	0.769	0.465	2.71924e-63	cone precursors	MTRNR2L12
HMGA1	5.5654e-84	1.09171	0.88	0.664	1.42836e-79	cone precursors	HMGA1
BASP1.1	8.74629e-72	1.07752	0.867	0.615	2.24474e-67	cone precursors	BASP1
ONECUT2	1.35804e-91	1.07347	0.391	0.101	3.4854e-87	cone precursors	ONECUT2
HOTAIRM1	3.6641e-97	1.07074	0.389	0.092	9.4039e-93	cone precursors	HOTAIRM1
SIX6	1.414e-90	1.04315	0.895	0.633	3.62902e-86	cone precursors	SIX6
ROBO2	1.81796e-87	1.0399	0.707	0.318	4.66579e-83	cone precursors	ROBO2
NXPH4	7.13078e-75	1.0194	0.386	0.115	1.83011e-70	cone precursors	NXPH4
UCHL1	4.25021e-51	1.012	0.681	0.408	1.09082e-46	cone precursors	UCHL1
C1QL1	5.09166e-155	1.0089	0.299	0.037	1.30677e-150	cone precursors	C1QL1
MXRA8	2.39817e-90	0.998781	0.454	0.136	6.15491e-86	cone precursors	MXRA8
FABP7.1	1.00072e-70	0.988156	0.959	0.815	2.56834e-66	cone precursors	FABP7
DAPL1	6.0514e-55	0.984309	0.668	0.373	1.55309e-50	cone precursors	DAPL1
FXYD7	1.15706e-92	0.981022	0.36	0.085	2.9696e-88	cone precursors	FXYD7
SH3BP5	3.7046e-69	0.978669	0.395	0.125	9.50786e-65	cone precursors	SH3BP5
RBP4	6.35747e-90	0.971688	0.362	0.087	1.63164e-85	cone precursors	RBP4
DCX	8.17782e-130	0.969352	0.4	0.077	2.09884e-125	cone precursors	DCX
INSM2	2.24339e-84	0.965818	0.476	0.154	5.75765e-80	cone precursors	INSM2
NEAT1	1.38828e-59	0.954424	0.424	0.155	3.56303e-55	cone precursors	NEAT1
GATA2	6.17503e-249	0.954216	0.266	0.016	1.58482e-244	cone precursors	GATA2
PRRT2	1.56613e-71	0.945697	0.585	0.249	4.01948e-67	cone precursors	PRRT2
SLC22A17	8.60324e-51	0.93796	0.369	0.138	2.20802e-46	cone precursors	SLC22A17
TUBB2B	7.41024e-60	0.929472	0.965	0.85	1.90184e-55	cone precursors	TUBB2B
INSM1.1	7.5926e-47	0.923458	0.712	0.453	1.94864e-42	cone precursors	INSM1
LHX9	9.76685e-101	0.919258	0.386	0.089	2.50666e-96	cone precursors	LHX9
SLC16A9	2.79121e-56	0.916344	0.354	0.12	7.16365e-52	cone precursors	SLC16A9
H2AFZ	1.08987e-74	0.915336	0.969	0.889	2.79715e-70	cone precursors	H2AFZ
TAGLN3	1.40516e-50	0.909226	0.712	0.429	3.60634e-46	cone precursors	TAGLN3
GALNT14	0	0.887932	0.236	0.004	0	cone precursors	GALNT14
RAB26	5.09042e-126	0.884649	0.384	0.074	1.30646e-121	cone precursors	RAB26
SVBP	6.84344e-56	0.876762	0.742	0.474	1.75637e-51	cone precursors	SVBP
TCEAL7	5.81895e-35	0.87415	0.465	0.244	1.49343e-30	cone precursors	TCEAL7
GUCY1A2	5.48106e-50	0.869757	0.428	0.175	1.40671e-45	cone precursors	GUCY1A2
KDELR1	2.34204e-62	0.863673	0.83	0.579	6.01085e-58	cone precursors	KDELR1
SUSD2	3.33014e-106	0.863054	0.293	0.051	8.54681e-102	cone precursors	SUSD2
LINC01315	1.63509e-112	0.85449	0.341	0.066	4.19645e-108	cone precursors	LINC01315
ELAVL4	4.46771e-77	0.833132	0.328	0.08	1.14664e-72	cone precursors	ELAVL4
KIF5C	1.69373e-45	0.830804	0.441	0.192	4.34695e-41	cone precursors	KIF5C
MT-ND4L	1.28726e-37	0.829143	0.74	0.532	3.30375e-33	cone precursors	MT-ND4L
XKR4	4.37349e-122	0.826303	0.306	0.049	1.12246e-117	cone precursors	XKR4
CERKL	4.22048e-55	0.809153	0.437	0.172	1.08319e-50	cone precursors	CERKL
MCC.1	1.32053e-56	0.807019	0.563	0.258	3.38913e-52	cone precursors	MCC
RAX	8.04774e-53	0.802358	0.843	0.574	2.06545e-48	cone precursors	RAX
SPAG1	8.2365e-114	0.799486	0.197	0.021	2.1139e-109	cone precursors	SPAG1
MT-CYB	3.37823e-57	0.792185	0.991	0.968	8.67022e-53	cone precursors	MT-CYB
ISL2	1.73306e-68	0.788074	0.378	0.113	4.44789e-64	cone precursors	ISL2
MSANTD4	2.55722e-39	0.778465	0.424	0.195	6.56311e-35	cone precursors	MSANTD4
MRLN.1	1.99094e-27	0.778398	0.635	0.397	5.10974e-23	cone precursors	MRLN
CRYAB	1.08461e-50	0.778152	0.238	0.062	2.78365e-46	cone precursors	CRYAB
ACTG1	7.67875e-118	0.776884	1	0.99	1.97075e-113	cone precursors	ACTG1
CCDC88C	1.07936e-67	0.776236	0.367	0.111	2.77017e-63	cone precursors	CCDC88C
SARS	9.88231e-21	0.770379	0.566	0.401	2.53629e-16	cone precursors	SARS
GUCY1B1	2.02145e-116	0.763703	0.264	0.038	5.18804e-112	cone precursors	GUCY1B1
GSTP1.1	5.17377e-72	0.761827	0.974	0.922	1.32785e-67	cone precursors	GSTP1
NLRP1	3.33476e-34	0.761557	0.517	0.293	8.55865e-30	cone precursors	NLRP1
NELL2.1	9.83925e-36	0.757603	0.59	0.349	2.52524e-31	cone precursors	NELL2
GNB2	2.38523e-49	0.750806	0.688	0.389	6.12168e-45	cone precursors	GNB2
BAD.1	1.23678e-37	0.738172	0.736	0.506	3.17419e-33	cone precursors	BAD
ANKRD65	1.34944e-59	0.734243	0.439	0.162	3.46334e-55	cone precursors	ANKRD65
GNG3	4.50859e-34	0.727994	0.312	0.125	1.15713e-29	cone precursors	GNG3
GRK3	1.47602e-67	0.721927	0.308	0.08	3.7882e-63	cone precursors	GRK3
INA	5.31072e-35	0.706846	0.539	0.301	1.363e-30	cone precursors	INA
SSTR2	2.96002e-37	0.705838	0.452	0.212	7.59688e-33	cone precursors	SSTR2
NECTIN3	4.77607e-49	0.702243	0.384	0.148	1.22578e-44	cone precursors	NECTIN3
EML4	2.59015e-19	-0.700667	0.249	0.44	6.64761e-15	cone precursors	EML4
CNGB1.1	6.59403e-20	-0.701419	0.028	0.202	1.69236e-15	cone precursors	CNGB1
ANK3	2.03023e-16	-0.703223	0.026	0.17	5.21059e-12	cone precursors	ANK3
FAM89A	1.91463e-15	-0.707408	0.26	0.432	4.9139e-11	cone precursors	FAM89A
IMPG2.1	5.80758e-17	-0.711877	0.275	0.443	1.49052e-12	cone precursors	IMPG2
HMGN2	3.8556e-48	-0.727318	0.836	0.93	9.89539e-44	cone precursors	HMGN2
RPL7	2.47831e-57	-0.735584	0.95	0.983	6.36057e-53	cone precursors	RPL7
STX3.1	1.69428e-21	-0.748059	0.275	0.471	4.34836e-17	cone precursors	STX3
RBP1.1	1.72736e-28	-0.748495	0.734	0.826	4.43326e-24	cone precursors	RBP1
EPB41	5.56587e-24	-0.750209	0.345	0.55	1.42848e-19	cone precursors	EPB41
CA10.1	4.69635e-18	-0.751948	0.009	0.156	1.20532e-13	cone precursors	CA10
RGS16.1	0.000439292	-0.753968	0.328	0.385	1	cone precursors	RGS16
RBP3.1	1.5927e-17	-0.779476	0.21	0.39	4.08766e-13	cone precursors	RBP3
ARL6IP5.1	4.85802e-24	-0.784204	0.214	0.435	1.24681e-19	cone precursors	ARL6IP5
LHX3.1	8.17225e-27	-0.785356	0.028	0.248	2.09741e-22	cone precursors	LHX3
MAK.1	1.22264e-24	-0.799001	0.118	0.347	3.13792e-20	cone precursors	MAK
MIR124-2HG.1	3.33526e-19	-0.806202	0.197	0.385	8.55995e-15	cone precursors	MIR124-2HG
FAM131C.1	1.14251e-15	-0.808862	0.031	0.172	2.93226e-11	cone precursors	FAM131C
TLE3	3.87778e-25	-0.815021	0.249	0.482	9.95233e-21	cone precursors	TLE3
FOS	2.52016e-13	-0.821384	0.561	0.645	6.46799e-09	cone precursors	FOS
POLR2J3.1	9.20356e-22	-0.822335	0.227	0.435	2.36209e-17	cone precursors	POLR2J3.1
VSX2	1.20188e-17	-0.824367	0.098	0.269	3.08462e-13	cone precursors	VSX2
GADD45G	7.25819e-37	-0.830327	0.755	0.851	1.86282e-32	cone precursors	GADD45G
SLC6A17.1	6.614e-27	-0.837861	0.046	0.269	1.69748e-22	cone precursors	SLC6A17
LOXL1.1	1.99357e-21	-0.86688	0.376	0.551	5.11651e-17	cone precursors	LOXL1
CCND1.1	1.18292e-11	-0.87707	0.245	0.382	3.03597e-07	cone precursors	CCND1
XIST	7.30985e-24	-0.877777	0.229	0.478	1.87607e-19	cone precursors	XIST
CKAP4	7.11593e-30	-0.881436	0.214	0.468	1.8263e-25	cone precursors	CKAP4
MYO9A.1	1.69183e-28	-0.88249	0.131	0.38	4.34209e-24	cone precursors	MYO9A
LAPTM4B.1	5.14461e-30	-0.89223	0.432	0.618	1.32036e-25	cone precursors	LAPTM4B
MPP4.1	1.27063e-25	-0.909611	0.066	0.289	3.26108e-21	cone precursors	MPP4
RIMS2.1	1.35372e-26	-0.916124	0.151	0.388	3.47432e-22	cone precursors	RIMS2
ANKRD33B.1	4.43381e-31	-0.917363	0.192	0.457	1.13794e-26	cone precursors	ANKRD33B
SOX4	2.75006e-62	-0.923786	0.967	0.98	7.05803e-58	cone precursors	SOX4
TCF4.1	1.14003e-23	-0.933869	0.325	0.522	2.92589e-19	cone precursors	TCF4
UNC119.1	1.15133e-24	-0.939823	0.456	0.626	2.9549e-20	cone precursors	UNC119
SLC1A7.1	6.04242e-35	-0.945323	0.255	0.524	1.55079e-30	cone precursors	SLC1A7
PTPN13.1	2.79689e-28	-0.949724	0.138	0.38	7.17823e-24	cone precursors	PTPN13
TMEM244.1	1.80112e-30	-0.958699	0.105	0.361	4.62256e-26	cone precursors	TMEM244
GNGT2.1	3.94262e-28	-0.965734	0.079	0.318	1.01187e-23	cone precursors	GNGT2
AL451062.1.1	1.22691e-21	-0.987069	0.463	0.599	3.14886e-17	cone precursors	AL451062.1
CSRP2.1	1.7597e-13	-0.995085	0.349	0.488	4.51628e-09	cone precursors	CSRP2
TMEM91.1	8.35148e-31	-1.00192	0.188	0.447	2.14341e-26	cone precursors	TMEM91
ZFP36L2	4.86248e-34	-1.00558	0.341	0.59	1.24796e-29	cone precursors	ZFP36L2
NFIB	6.78027e-35	-1.02695	0.153	0.451	1.74016e-30	cone precursors	NFIB
EPS8.1	2.66068e-35	-1.04056	0.116	0.398	6.82864e-31	cone precursors	EPS8
CABP5.1	8.56696e-28	-1.04123	0.048	0.278	2.19871e-23	cone precursors	CABP5
KCNV2.1	2.44354e-26	-1.05177	0.096	0.322	6.27133e-22	cone precursors	KCNV2
SSX2IP	5.63627e-47	-1.0605	0.317	0.627	1.44655e-42	cone precursors	SSX2IP
EPB41L2.1	9.03056e-35	-1.089	0.356	0.592	2.31769e-30	cone precursors	EPB41L2
GNB3.1	6.71333e-42	-1.09137	0.745	0.796	1.72297e-37	cone precursors	GNB3
PDE6H.1	3.83516e-10	-1.16376	0.033	0.13	9.84293e-06	cone precursors	PDE6H
ARL4D.1	7.3299e-36	-1.2597	0.245	0.523	1.88122e-31	cone precursors	ARL4D
PTPRZ1	9.17304e-49	-1.30075	0.096	0.439	2.35426e-44	cone precursors	PTPRZ1
RAX2.1	1.86256e-38	-1.31137	0.179	0.473	4.78027e-34	cone precursors	RAX2
GNAT1.1	1.28877e-34	-1.3145	0.037	0.306	3.30763e-30	cone precursors	GNAT1
ROM1.1	2.00368e-37	-1.36342	0.476	0.644	5.14244e-33	cone precursors	ROM1
AIPL1.1	5.08863e-37	-1.3985	0.651	0.701	1.306e-32	cone precursors	AIPL1
NTM.1	1.77675e-59	-1.72617	0.098	0.495	4.56003e-55	cone precursors	NTM
VSX1.1	1.42655e-19	-1.81145	0.017	0.179	3.66125e-15	cone precursors	VSX1
RP1.1	1.30734e-53	-1.86402	0.153	0.502	3.35528e-49	cone precursors	RP1
RCVRN.1	1.04299e-61	-1.8843	0.611	0.784	2.67683e-57	cone precursors	RCVRN
NR2E3.1	5.67834e-73	-2.05682	0.07	0.519	1.45735e-68	cone precursors	NR2E3
PDC.1	2.21405e-88	-2.34221	0.192	0.655	5.68235e-84	cone precursors	PDC
NRL.1	7.37029e-105	-2.39664	0.456	0.822	1.89158e-100	cone precursors	NRL
PDE6H.2	0	2.88999	0.486	0.067	0	cones	PDE6H
RRAD.1	0	2.03646	0.767	0.241	0	cones	RRAD
DCT.2	0	1.99245	0.902	0.348	0	cones	DCT
CRABP2.1	0	1.62451	0.887	0.478	0	cones	CRABP2
RXRG	0	1.60789	0.839	0.401	0	cones	RXRG
HOTAIRM1.1	0	1.52032	0.484	0.04	0	cones	HOTAIRM1
GUK1.1	0	1.34862	0.917	0.648	0	cones	GUK1
CCDC141	0	1.30459	0.499	0.052	0	cones	CCDC141
RBP4.1	0	1.29483	0.494	0.032	0	cones	RBP4
SPON2	0	1.24547	0.524	0.112	0	cones	SPON2
ATP5A1	2.34332e-74	1.24199	0.197	0.073	6.01414e-70	cones	ATP5A1
THRB.1	0	1.22157	0.604	0.086	0	cones	THRB
ISL2.1	0	1.19588	0.522	0.057	0	cones	ISL2
DHRS7	0	1.16853	0.664	0.21	0	cones	DHRS7
PCAT4.1	0	1.16291	0.453	0.034	0	cones	PCAT4
GNB2L1	4.0879e-60	1.04772	0.197	0.077	1.04916e-55	cones	GNB2L1
PLEKHB1.1	4.67433e-269	1.04583	0.705	0.319	1.19967e-264	cones	PLEKHB1
HDDC2	7.66661e-277	1.04353	0.646	0.264	1.96764e-272	cones	HDDC2
PPA1	2.80234e-261	1.04232	0.81	0.49	7.1922e-257	cones	PPA1
PRDM1.2	4.15611e-232	1.01772	0.849	0.493	1.06667e-227	cones	PRDM1
CLTB	3.79801e-257	0.989818	0.613	0.229	9.74759e-253	cones	CLTB
LMO4.1	7.32046e-234	0.974273	0.674	0.302	1.8788e-229	cones	LMO4
CPLX1	0	0.970625	0.456	0.067	0	cones	CPLX1
OLFM1	0	0.965812	0.508	0.117	0	cones	OLFM1
SIX6.1	7.6937e-249	0.956299	0.862	0.606	1.97459e-244	cones	SIX6
ATP5G2	4.84327e-66	0.94793	0.197	0.075	1.24303e-61	cones	ATP5G2
GLTSCR2	7.85395e-70	0.926775	0.197	0.073	2.01572e-65	cones	GLTSCR2
MPP4.2	2.82333e-212	0.920421	0.579	0.231	7.24608e-208	cones	MPP4
FAM57B.2	5.76653e-216	0.905627	0.815	0.483	1.47998e-211	cones	FAM57B
CPLX4.1	2.23872e-251	0.903438	0.456	0.129	5.74567e-247	cones	CPLX4
MCC.2	2.3562e-267	0.88668	0.607	0.213	6.04718e-263	cones	MCC
KCTD17	0	0.884544	0.483	0.109	0	cones	KCTD17
RPLP0	0	0.86512	0.985	0.971	0	cones	RPLP0
FAM213A.1	1.17614e-199	0.83285	0.777	0.442	3.01856e-195	cones	FAM213A
ALDOA	1.13983e-49	0.830389	0.299	0.163	2.92537e-45	cones	ALDOA
GSTP1.2	8.82834e-262	0.794399	0.969	0.917	2.26579e-257	cones	GSTP1
MDFI	0	0.790937	0.338	0.033	0	cones	MDFI
ATP5L	1.0533e-65	0.790481	0.197	0.074	2.7033e-61	cones	ATP5L
CNTN1	0	0.789902	0.417	0.078	0	cones	CNTN1
KCNV2.2	4.93229e-182	0.787178	0.602	0.267	1.26587e-177	cones	KCNV2
ATP5E	3.57343e-68	0.785728	0.196	0.072	9.17121e-64	cones	ATP5E
LHX3.2	1.05269e-211	0.783894	0.532	0.192	2.70172e-207	cones	LHX3
APMAP	1.41322e-190	0.783647	0.679	0.332	3.62702e-186	cones	APMAP
HMGA1.1	1.58974e-167	0.775049	0.863	0.641	4.08007e-163	cones	HMGA1
CABP2.1	2.92088e-221	0.767328	0.58	0.218	7.49645e-217	cones	CABP2
GNB3.2	3.42054e-179	0.762807	0.975	0.764	8.77882e-175	cones	GNB3
VXN.1	9.50455e-128	0.760411	0.563	0.291	2.43934e-123	cones	VXN
IFI27L2	1.92083e-169	0.7584	0.581	0.264	4.92982e-165	cones	IFI27L2
WWC1	0	0.755724	0.422	0.087	0	cones	WWC1
TTN	0	0.753576	0.33	0.045	0	cones	TTN
SLC40A1.1	6.7587e-176	0.743728	0.637	0.292	1.73462e-171	cones	SLC40A1
ENAH	4.2982e-156	0.742368	0.766	0.47	1.10313e-151	cones	ENAH
C14orf2	3.9886e-69	0.740932	0.196	0.072	1.02367e-64	cones	C14orf2
PCSK1N	1.69975e-153	0.734692	0.609	0.289	4.36242e-149	cones	PCSK1N
MAP1B	1.68861e-189	0.723504	0.961	0.89	4.33381e-185	cones	MAP1B
PRDM8.1	1.38745e-19	-0.700904	0.081	0.156	3.56088e-15	cones	PRDM8
CA10.2	2.31242e-46	-0.711361	0.042	0.169	5.93484e-42	cones	CA10
SOX2.1	5.00467e-33	-0.722284	0.295	0.401	1.28445e-28	cones	SOX2
SIX3	3.83996e-109	-0.735774	0.687	0.786	9.85527e-105	cones	SIX3
MYO9A.2	7.20422e-42	-0.747043	0.27	0.387	1.84896e-37	cones	MYO9A
NNAT	7.1039e-89	-0.753061	0.707	0.778	1.82322e-84	cones	NNAT
DDIT4	3.58268e-52	-0.771832	0.506	0.607	9.19496e-48	cones	DDIT4
FEZF2.1	1.99734e-45	-0.775358	0.071	0.205	5.12617e-41	cones	FEZF2
CABP5.2	7.04066e-25	-0.775467	0.194	0.282	1.80698e-20	cones	CABP5
MDK.1	6.38449e-09	-0.781165	0.341	0.36	0.000163858	cones	MDK
BTBD8.1	9.80058e-56	-0.792423	0.403	0.532	2.51532e-51	cones	BTBD8
PROX1.1	2.41031e-63	-0.818955	0.069	0.239	6.18605e-59	cones	PROX1
CCNG2	9.14532e-97	-0.822995	0.516	0.648	2.34715e-92	cones	CCNG2
HES5.1	1.61056e-12	-0.824828	0.124	0.188	4.13349e-08	cones	HES5
MEG3.1	2.69858e-38	-0.827456	0.262	0.382	6.92592e-34	cones	MEG3
BTG1	2.54991e-191	-0.833248	0.83	0.901	6.54434e-187	cones	BTG1
EML4.1	2.38236e-81	-0.866723	0.274	0.459	6.11432e-77	cones	EML4
PTPRZ1.1	5.75869e-83	-0.86907	0.251	0.456	1.47797e-78	cones	PTPRZ1
GNAT1.2	1.32073e-24	-0.871828	0.222	0.309	3.38965e-20	cones	GNAT1
FAM131C.2	1.25753e-57	-0.908426	0.039	0.187	3.22746e-53	cones	FAM131C
CRYBG3	6.76451e-88	-0.918342	0.217	0.437	1.73611e-83	cones	CRYBG3
SSX2IP.1	2.27727e-102	-0.950987	0.494	0.635	5.8446e-98	cones	SSX2IP
EPB41.1	4.86078e-121	-0.956315	0.346	0.575	1.24752e-116	cones	EPB41
VSX2.1	5.94503e-75	-0.977598	0.098	0.29	1.52579e-70	cones	VSX2
RGS16.2	1.51522e-21	-1.0129	0.327	0.392	3.88882e-17	cones	RGS16
CD24	7.19138e-73	-1.02819	0.357	0.51	1.84567e-68	cones	CD24
TCF4.2	1.72999e-110	-1.05692	0.33	0.545	4.44002e-106	cones	TCF4
ZBTB20	1.42163e-120	-1.06353	0.203	0.462	3.64862e-116	cones	ZBTB20
RORB.1	3.1865e-184	-1.07875	0.848	0.89	8.17816e-180	cones	RORB
RBP1.2	2.46324e-185	-1.08997	0.752	0.834	6.32189e-181	cones	RBP1
MIAT.1	9.38954e-49	-1.11098	0.218	0.361	2.40983e-44	cones	MIAT
ROM1.2	2.41407e-87	-1.12355	0.541	0.654	6.19572e-83	cones	ROM1
PCP2.1	2.6245e-23	-1.16365	0.066	0.149	6.73577e-19	cones	PCP2
NR2E3.2	8.44201e-82	-1.19785	0.355	0.527	2.16664e-77	cones	NR2E3
SOX4.1	0	-1.33094	0.932	0.987	0	cones	SOX4
FABP7.2	4.36563e-68	-1.33165	0.835	0.817	1.12044e-63	cones	FABP7
NFIB.1	4.23184e-138	-1.33334	0.199	0.48	1.0861e-133	cones	NFIB
NRL.2	7.56283e-133	-1.43271	0.758	0.817	1.941e-128	cones	NRL
CSRP2.2	4.56765e-107	-1.57355	0.303	0.512	1.17229e-102	cones	CSRP2
ATOH7.1	1.36157e-37	-1.663	0.054	0.165	3.49448e-33	cones	ATOH7
VSX1.2	1.10214e-55	-1.7481	0.047	0.194	2.82864e-51	cones	VSX1
FABP7.3	0	1.7807	0.97	0.806	0	T3	FABP7
CSRP2.3	4.90053e-258	1.49824	0.859	0.447	1.25772e-253	T3	CSRP2
NFIB.2	2.51978e-204	1.30315	0.796	0.407	6.467e-200	T3	NFIB
BNIP3	6.80618e-120	1.0781	0.772	0.515	1.74681e-115	T3	BNIP3
BSG	1.12425e-224	1.01734	0.976	0.838	2.88538e-220	T3	BSG
ATOH7.2	3.68984e-151	0.981192	0.419	0.124	9.46998e-147	T3	ATOH7
NEUROD4.1	4.60969e-145	0.969298	0.969	0.821	1.18308e-140	T3	NEUROD4
CD44	4.30759e-179	0.943182	0.395	0.105	1.10554e-174	T3	CD44
DLL3.1	1.59865e-125	0.927573	0.643	0.32	4.10293e-121	T3	DLL3
TMA16	3.92105e-111	0.920357	0.64	0.353	1.00634e-106	T3	TMA16
RBP1.3	7.33065e-185	0.893386	0.972	0.809	1.88141e-180	T3	RBP1
CALB1	1.73458e-32	0.890966	0.144	0.055	4.45179e-28	T3	CALB1
MDK.2	4.21207e-79	0.889096	0.582	0.336	1.08103e-74	T3	MDK
SPARC	8.34872e-118	0.884	0.464	0.188	2.1427e-113	T3	SPARC
SEMA5A.1	3.41176e-109	0.879258	0.422	0.166	8.75629e-105	T3	SEMA5A
CADM3	7.59578e-121	0.858082	0.753	0.456	1.94946e-116	T3	CADM3
CD24.1	3.49396e-87	0.813368	0.717	0.467	8.96724e-83	T3	CD24
PTH2.1	6.84241e-67	0.80743	0.206	0.063	1.7561e-62	T3	PTH2
PCSK2.1	9.20656e-91	0.751952	0.341	0.125	2.36286e-86	T3	PCSK2
VXN.2	3.04423e-51	0.727298	0.514	0.312	7.81302e-47	T3	VXN
CHRNA1	3.72322e-135	0.723168	0.306	0.077	9.55564e-131	T3	CHRNA1
FAM162A	4.31548e-57	0.716694	0.47	0.272	1.10757e-52	T3	FAM162A
GNG5.1	1.25376e-72	0.710469	0.806	0.616	3.21777e-68	T3	GNG5
EPS8.2	1.13611e-37	-0.703534	0.219	0.404	2.91583e-33	T3	EPS8
ARL6IP5.2	9.38927e-45	-0.708278	0.238	0.445	2.40976e-40	T3	ARL6IP5
MCC.3	1.1156e-51	-0.726964	0.075	0.287	2.86318e-47	T3	MCC
LHX3.3	3.77507e-51	-0.736165	0.054	0.257	9.68872e-47	T3	LHX3
IMPG2.2	2.49341e-41	-0.758176	0.269	0.453	6.39935e-37	T3	IMPG2
FAM57B.3	4.3386e-45	-0.758237	0.356	0.546	1.1135e-40	T3	FAM57B
IMPG1.1	1.20721e-43	-0.771202	0.049	0.228	3.09832e-39	T3	IMPG1
STX3.2	9.27692e-55	-0.77824	0.254	0.484	2.38092e-50	T3	STX3
PDE4DIP.1	7.94034e-51	-0.784968	0.106	0.323	2.03789e-46	T3	PDE4DIP
MATK.1	9.19836e-53	-0.78809	0.078	0.292	2.36076e-48	T3	MATK
GNG13.1	1.72135e-48	-0.789617	0.153	0.372	4.41785e-44	T3	GNG13
PLEKHB1.2	2.52231e-38	-0.793249	0.21	0.389	6.4735e-34	T3	PLEKHB1
GNGT2.2	1.0613e-41	-0.812734	0.135	0.326	2.72384e-37	T3	GNGT2
TULP1.1	2.7172e-58	-0.841107	0.32	0.541	6.97371e-54	T3	TULP1
ARL4D.2	2.99198e-25	-0.848346	0.411	0.522	7.67891e-21	T3	ARL4D
PTPN13.2	3.2048e-48	-0.85431	0.181	0.389	8.22511e-44	T3	PTPN13
ISOC1.1	2.578e-49	-0.858448	0.15	0.367	6.61645e-45	T3	ISOC1
CABP5.3	1.60434e-48	-0.951911	0.085	0.287	4.11754e-44	T3	CABP5
KCNV2.3	2.32274e-52	-1.00153	0.118	0.332	5.96131e-48	T3	KCNV2
RIMS2.2	1.05528e-70	-1.00919	0.137	0.402	2.70838e-66	T3	RIMS2
MPP4.3	5.0063e-60	-1.01514	0.07	0.3	1.28487e-55	T3	MPP4
NR2E3.3	1.4416e-45	-1.03947	0.346	0.517	3.69986e-41	T3	NR2E3
TUBA1B	1.56923e-121	-1.04828	0.673	0.848	4.02743e-117	T3	TUBA1B
FSTL5.1	4.28177e-86	-1.06157	0.276	0.562	1.09892e-81	T3	FSTL5
GNAT1.3	1.24765e-42	-1.08848	0.124	0.312	3.2021e-38	T3	GNAT1
GNB3.3	1.71748e-111	-1.12573	0.646	0.808	4.40793e-107	T3	GNB3
UNC119.2	4.69292e-86	-1.14355	0.395	0.641	1.20444e-81	T3	UNC119
PDE6H.3	1.25778e-19	-1.17475	0.041	0.135	3.22809e-15	T3	PDE6H
PDC.2	1.67715e-72	-1.31492	0.5	0.651	4.30442e-68	T3	PDC
CRABP2.2	2.46228e-72	-1.44331	0.332	0.555	6.31943e-68	T3	CRABP2
RAX2.2	2.47247e-96	-1.47207	0.186	0.488	6.34559e-92	T3	RAX2
VSX1.3	9.33792e-16	-1.48506	0.092	0.181	2.39658e-11	T3	VSX1
NTM.2	1.03414e-103	-1.56224	0.183	0.508	2.65413e-99	T3	NTM
RP1.2	1.06485e-92	-1.57208	0.222	0.514	2.73294e-88	T3	RP1
RCVRN.2	3.01676e-121	-1.62943	0.633	0.791	7.7425e-117	T3	RCVRN
AIPL1.2	1.65141e-161	-1.91171	0.446	0.723	4.23833e-157	T3	AIPL1
NRL.3	0	1.43823	0.995	0.709	0	rod precursors	NRL
NR2E3.4	0	1.41767	0.859	0.311	0	rod precursors	NR2E3
PDC.3	0	1.38867	0.951	0.47	0	rod precursors	PDC
AL451062.1.2	0	1.32437	0.827	0.469	0	rod precursors	AL451062.1
TMEM91.2	0	1.28492	0.723	0.284	0	rod precursors	TMEM91
EPB41L2.2	0	1.14262	0.827	0.452	0	rod precursors	EPB41L2
RCVRN.3	0	1.12169	0.99	0.664	0	rod precursors	RCVRN
MYO9A.3	0	1.06034	0.61	0.242	0	rod precursors	MYO9A
ROM1.3	0	1.03989	0.912	0.491	0	rod precursors	ROM1
NTM.3	0	1.00513	0.732	0.345	0	rod precursors	NTM
MRLN.2	0	0.993429	0.661	0.269	0	rod precursors	MRLN
SLC6A17.2	0	0.968005	0.489	0.138	0	rod precursors	SLC6A17
ANKRD33B.2	0	0.966137	0.653	0.337	0	rod precursors	ANKRD33B
HIST1H1C.1	3.32553e-289	0.952993	0.757	0.499	8.53498e-285	rod precursors	HIST1H1C
MARCH1.1	0	0.926405	0.661	0.349	0	rod precursors	2001-03-01
EPS8.3	0	0.914348	0.613	0.268	0	rod precursors	EPS8
RP1.3	0	0.902373	0.76	0.344	0	rod precursors	RP1
SYTL4	0	0.895644	0.436	0.124	0	rod precursors	SYTL4
NEUROD1.1	0	0.867609	0.977	0.873	0	rod precursors	NEUROD1
AMER2.1	0	0.866574	0.913	0.746	0	rod precursors	AMER2
AIPL1.3	0	0.864058	0.958	0.559	0	rod precursors	AIPL1
ATP1B2.1	0	0.844646	0.875	0.669	0	rod precursors	ATP1B2
BTBD8.2	1.18805e-248	0.840396	0.681	0.424	3.04913e-244	rod precursors	BTBD8
MAP1LC3B.1	0	0.830211	0.83	0.641	0	rod precursors	MAP1LC3B
BAZ2B	0	0.823812	0.848	0.697	0	rod precursors	BAZ2B
TMEM244.2	1.77355e-296	0.821864	0.565	0.238	4.55181e-292	rod precursors	TMEM244
IMPG2.3	1.14596e-299	0.819234	0.659	0.318	2.9411e-295	rod precursors	IMPG2
UBXN4.1	0	0.803168	0.882	0.721	0	rod precursors	UBXN4
CDKN1C.1	1.06944e-210	0.785486	0.684	0.446	2.74471e-206	rod precursors	CDKN1C
MAK.2	1.06533e-281	0.778416	0.542	0.229	2.73417e-277	rod precursors	MAK
ADGRV1.1	1.6839e-222	0.768775	0.557	0.286	4.32173e-218	rod precursors	ADGRV1
PAG1.1	2.24578e-211	0.745844	0.496	0.238	5.76379e-207	rod precursors	PAG1
CASZ1	2.61919e-199	0.720324	0.559	0.307	6.72214e-195	rod precursors	CASZ1
FAM161A.1	7.12664e-275	0.71285	0.834	0.605	1.82905e-270	rod precursors	FAM161A
PKM.1	1.82583e-226	0.712666	0.878	0.796	4.68598e-222	rod precursors	PKM
LOXL1.2	1.88141e-192	0.710534	0.699	0.462	4.82864e-188	rod precursors	LOXL1
GNB3.4	0	0.710339	0.968	0.7	0	rod precursors	GNB3
TLE3.1	3.50376e-184	0.704675	0.627	0.39	8.99241e-180	rod precursors	TLE3
TMSB4X	2.06018e-139	-0.700118	0.913	0.94	5.28746e-135	rod precursors	TMSB4X
TRH.1	6.55046e-49	-0.706936	0.07	0.157	1.68118e-44	rod precursors	TRH
BASP1.2	1.83346e-133	-0.707993	0.523	0.678	4.70557e-129	rod precursors	BASP1
CD24.2	2.53488e-51	-0.713117	0.439	0.515	6.50578e-47	rod precursors	CD24
ASCL1.1	1.20802e-39	-0.730697	0.219	0.306	3.10039e-35	rod precursors	ASCL1
TAGLN3.1	1.37959e-139	-0.739336	0.312	0.507	3.54072e-135	rod precursors	TAGLN3
SH3BGRL3.1	7.76736e-90	-0.743031	0.277	0.428	1.99349e-85	rod precursors	SH3BGRL3
PROX1.2	1.10722e-69	-0.748085	0.138	0.256	2.84169e-65	rod precursors	PROX1
KLHL35	5.63595e-119	-0.757023	0.058	0.21	1.44647e-114	rod precursors	KLHL35
THRB.2	4.50504e-113	-0.758255	0.063	0.211	1.15622e-108	rod precursors	THRB
ZFHX4.1	7.22164e-44	-0.762151	0.126	0.215	1.85343e-39	rod precursors	ZFHX4
SSTR2.1	4.33804e-102	-0.76721	0.123	0.274	1.11336e-97	rod precursors	SSTR2
LMO4.2	1.07938e-75	-0.780963	0.269	0.401	2.77023e-71	rod precursors	LMO4
H1F0.1	2.25365e-101	-0.800138	0.241	0.399	5.78399e-97	rod precursors	H1F0
TUBA1A	4.08455e-289	-0.804279	0.883	0.939	1.0483e-284	rod precursors	TUBA1A
GADD45A.1	3.20679e-56	-0.817478	0.241	0.348	8.23022e-52	rod precursors	GADD45A
TUBB2B.1	4.66474e-278	-0.82722	0.781	0.894	1.19721e-273	rod precursors	TUBB2B
CA10.3	2.16039e-115	-0.833205	0.056	0.202	5.54463e-111	rod precursors	CA10
IGSF21.1	1.06133e-162	-0.833362	0.077	0.272	2.7239e-158	rod precursors	IGSF21
DLL3.2	1.917e-98	-0.884681	0.246	0.402	4.91999e-94	rod precursors	DLL3
HES5.2	3.48695e-08	-0.903	0.16	0.189	0.000894925	rod precursors	HES5
PRDM8.2	9.91357e-87	-0.916717	0.065	0.188	2.54432e-82	rod precursors	PRDM8
FEZF2.2	1.70793e-130	-0.929572	0.077	0.245	4.38339e-126	rod precursors	FEZF2
FAM131C.3	3.62067e-113	-0.985941	0.07	0.218	9.29244e-109	rod precursors	FAM131C
VSX2.2	9.1374e-173	-1.03138	0.125	0.337	2.34511e-168	rod precursors	VSX2
VXN.3	6.53469e-169	-1.11515	0.193	0.403	1.67713e-164	rod precursors	VXN
CSRP2.4	4.90817e-97	-1.17993	0.397	0.529	1.25968e-92	rod precursors	CSRP2
MDK.3	4.948e-129	-1.2037	0.242	0.419	1.2699e-124	rod precursors	MDK
PCP2.2	2.12747e-11	-1.20481	0.115	0.15	5.46016e-07	rod precursors	PCP2
PDE6H.4	2.25308e-26	-1.23915	0.088	0.147	5.78252e-22	rod precursors	PDE6H
RGS16.3	3.43266e-126	-1.34393	0.272	0.442	8.80992e-122	rod precursors	RGS16
MIAT.2	2.55957e-208	-1.3723	0.182	0.426	6.56913e-204	rod precursors	MIAT
ATOH7.3	4.40547e-79	-1.78796	0.073	0.191	1.13067e-74	rod precursors	ATOH7
VSX1.4	1.42217e-120	-1.94042	0.072	0.227	3.64999e-116	rod precursors	VSX1
VSX1.5	0	3.6021	0.701	0.071	0	BPs	VSX1
PCP2.3	0	2.74411	0.388	0.09	0	BPs	PCP2
PRDM8.3	0	2.14709	0.558	0.066	0	BPs	PRDM8
CA10.4	0	2.05529	0.693	0.047	0	BPs	CA10
ZFHX4.2	0	1.93211	0.52	0.119	0	BPs	ZFHX4
TMEM215	0	1.72888	0.447	0.014	0	BPs	TMEM215
VSX2.3	0	1.72051	0.735	0.172	0	BPs	VSX2
CADPS.1	0	1.70311	0.912	0.542	0	BPs	CADPS
IGSF21.2	0	1.68723	0.654	0.117	0	BPs	IGSF21
ZFHX3	0	1.65986	0.523	0.12	0	BPs	ZFHX3
ISL1	1.33104e-289	1.57088	0.256	0.035	3.4161e-285	BPs	ISL1
WFDC1	0	1.55631	0.348	0.02	0	BPs	WFDC1
ANK3.1	0	1.5562	0.512	0.098	0	BPs	ANK3
CD24.3	0	1.51103	0.824	0.424	0	BPs	CD24
SLC1A2.1	0	1.50687	0.614	0.144	0	BPs	SLC1A2
GSG1	0	1.46386	0.344	0.053	0	BPs	GSG1
LRTM1	0	1.45307	0.362	0.017	0	BPs	LRTM1
FEZF2.3	2.26597e-229	1.44034	0.416	0.142	5.81562e-225	BPs	FEZF2
IGF1	0	1.32563	0.336	0.008	0	BPs	IGF1
SSTR2.2	0	1.32285	0.512	0.165	0	BPs	SSTR2
NETO1	0	1.31166	0.314	0.01	0	BPs	NETO1
HHIP	0	1.29988	0.355	0.054	0	BPs	HHIP
SLC38A1	0	1.2839	0.499	0.149	0	BPs	SLC38A1
NRXN3	0	1.28154	0.485	0.062	0	BPs	NRXN3
DOK6	0	1.26134	0.371	0.026	0	BPs	DOK6
PTPRD	0	1.24786	0.508	0.138	0	BPs	PTPRD
STMN4.1	0	1.2446	0.534	0.144	0	BPs	STMN4
MAP4	0	1.21211	0.702	0.32	0	BPs	MAP4
KHDRBS3	4.02588e-247	1.21156	0.419	0.134	1.03324e-242	BPs	KHDRBS3
NOVA1	0	1.20049	0.498	0.122	0	BPs	NOVA1
PROX1.3	1.06624e-230	1.15249	0.465	0.167	2.73651e-226	BPs	PROX1
APC	4.71238e-285	1.14945	0.536	0.198	1.20943e-280	BPs	APC
KLHL35.1	0	1.12626	0.437	0.103	0	BPs	KLHL35
CRYBG3.1	2.58693e-216	1.12096	0.659	0.357	6.63934e-212	BPs	CRYBG3
CRMP1	4.76192e-298	1.12027	0.763	0.433	1.22215e-293	BPs	CRMP1
BCAT1	0	1.09799	0.335	0.028	0	BPs	BCAT1
FRMD3	0	1.09734	0.303	0.015	0	BPs	FRMD3
KCNMA1	0	1.08694	0.366	0.066	0	BPs	KCNMA1
PCDH9	7.64291e-182	1.08626	0.37	0.128	1.96155e-177	BPs	PCDH9
C3orf70	8.80495e-238	1.08525	0.436	0.147	2.25979e-233	BPs	C3orf70
LMO4.3	1.52108e-114	1.06277	0.543	0.318	3.90384e-110	BPs	LMO4
CSRP2.5	2.10823e-57	1.0614	0.6	0.46	5.41077e-53	BPs	CSRP2
SYNE1	6.91359e-140	1.04992	0.28	0.092	1.77437e-135	BPs	SYNE1
TRNP1	5.34311e-272	1.04857	0.167	0.01	1.37131e-267	BPs	TRNP1
THSD7A	7.82125e-204	1.04451	0.523	0.235	2.00732e-199	BPs	THSD7A
TMSB4X.1	4.49839e-202	1.03533	0.96	0.925	1.15451e-197	BPs	TMSB4X
FOXN3	1.61677e-245	1.01734	0.533	0.211	4.14944e-241	BPs	FOXN3
VCAN	1.35707e-199	1.01338	0.314	0.086	3.48291e-195	BPs	VCAN
ZEB2	2.85977e-189	0.980285	0.697	0.428	7.3396e-185	BPs	ZEB2
SAMSN1	0	0.978769	0.273	0.009	0	BPs	SAMSN1
CCDC88A	2.60617e-92	0.972583	0.683	0.523	6.68874e-88	BPs	CCDC88A
GNAO1	2.58536e-179	0.969164	0.24	0.054	6.63532e-175	BPs	GNAO1
GABRA1	0	0.965642	0.342	0.053	0	BPs	GABRA1
PLXDC2	0	0.963963	0.314	0.039	0	BPs	PLXDC2
RUNX1T1	0	0.960118	0.363	0.072	0	BPs	RUNX1T1
CPLX3.1	1.9959e-90	0.944924	0.427	0.25	5.12247e-86	BPs	CPLX3
NSG1	2.351e-186	0.942764	0.346	0.109	6.03385e-182	BPs	NSG1
MEG3.2	2.57362e-82	0.932717	0.521	0.335	6.6052e-78	BPs	MEG3
MACROD2	4.88413e-256	0.91994	0.374	0.098	1.25351e-251	BPs	MACROD2
TMEM176B	0	0.91636	0.216	0.012	0	BPs	TMEM176B
PLXDC1	8.4625e-249	0.915498	0.376	0.1	2.1719e-244	BPs	PLXDC1
GNG13.2	5.4503e-121	0.915415	0.542	0.317	1.39882e-116	BPs	GNG13
HPCA	3.37933e-237	0.913799	0.408	0.126	8.67306e-233	BPs	HPCA
MIR124-2HG.2	9.48543e-190	0.913076	0.625	0.331	2.43444e-185	BPs	MIR124-2HG
IRS1	1.86468e-223	0.907696	0.301	0.071	4.78571e-219	BPs	IRS1
RND3	2.84899e-177	0.905885	0.334	0.105	7.31193e-173	BPs	RND3
TPD52.1	2.93778e-110	0.894852	0.552	0.349	7.53982e-106	BPs	TPD52
LINC01896	7.5953e-129	0.893985	0.233	0.069	1.94933e-124	BPs	LINC01896
SERPINI1	9.56822e-120	0.877843	0.139	0.025	2.45568e-115	BPs	SERPINI1
TMEM196	0	0.876627	0.214	0.011	0	BPs	TMEM196
TAGLN3.2	2.49208e-194	0.870434	0.688	0.391	6.39593e-190	BPs	TAGLN3
TRPM1	0	0.870383	0.187	0.004	0	BPs	TRPM1
GRIK1	4.09406e-200	0.863302	0.278	0.067	1.05074e-195	BPs	GRIK1
LIN7A	0	0.851394	0.265	0.025	0	BPs	LIN7A
REV3L	1.26878e-150	0.844946	0.388	0.159	3.25633e-146	BPs	REV3L
APLP1.1	4.6294e-161	0.844096	0.572	0.309	1.18814e-156	BPs	APLP1
ASIC4	2.04205e-191	0.84037	0.351	0.112	5.24092e-187	BPs	ASIC4
ITM2C	3.30721e-143	0.839992	0.504	0.263	8.48796e-139	BPs	ITM2C
MAP7	8.14012e-169	0.839057	0.484	0.221	2.08916e-164	BPs	MAP7
ZNF804A	0	0.838173	0.227	0.02	0	BPs	ZNF804A
TUBA1A.1	9.12176e-296	0.836792	0.98	0.908	2.3411e-291	BPs	TUBA1A
STMN1	0	0.825027	0.99	0.97	0	BPs	STMN1
HEBP1	6.87315e-125	0.822848	0.342	0.145	1.76399e-120	BPs	HEBP1
CELF3	1.46418e-213	0.819041	0.406	0.135	3.75781e-209	BPs	CELF3
MLLT11	4.82421e-162	0.818466	0.708	0.468	1.23813e-157	BPs	MLLT11
PRKCB	0	0.80452	0.232	0.021	0	BPs	PRKCB
NDUFA4	2.93465e-185	0.799905	0.911	0.806	7.53177e-181	BPs	NDUFA4
SCD5	9.056e-159	0.786426	0.483	0.226	2.32422e-154	BPs	SCD5
CAMK2N1	3.35642e-96	0.783233	0.662	0.488	8.61424e-92	BPs	CAMK2N1
CAMK1D	1.7029e-246	0.779984	0.3	0.063	4.37049e-242	BPs	CAMK1D
SCG5	7.48824e-176	0.767731	0.392	0.14	1.92186e-171	BPs	SCG5
MRPS30-DT	5.23337e-133	0.767537	0.254	0.078	1.34314e-128	BPs	MRPS30-DT
GABRR3	4.28895e-302	0.76621	0.242	0.027	1.10076e-297	BPs	GABRR3
TUBB2B.2	2.13893e-235	0.76527	0.956	0.835	5.48956e-231	BPs	TUBB2B
APLP2	9.1303e-115	0.765207	0.567	0.35	2.34329e-110	BPs	APLP2
TBX2	3.76494e-136	0.759316	0.562	0.311	9.66271e-132	BPs	TBX2
NPR3	1.36429e-290	0.754776	0.164	0.007	3.50144e-286	BPs	NPR3
NNAT.1	3.66954e-162	0.747608	0.897	0.744	9.41787e-158	BPs	NNAT
CHN2	1.77081e-241	0.741266	0.239	0.038	4.5448e-237	BPs	CHN2
CLTB.1	1.03513e-136	0.74079	0.491	0.244	2.65666e-132	BPs	CLTB
ST18	6.53456e-147	0.735146	0.285	0.089	1.67709e-142	BPs	ST18
TSPAN13	4.99116e-175	0.734861	0.333	0.106	1.28098e-170	BPs	TSPAN13
CD200	1.69926e-187	0.729958	0.346	0.107	4.36115e-183	BPs	CD200
EPB41.2	2.53256e-116	0.729304	0.717	0.51	6.49981e-112	BPs	EPB41
ATCAY	1.77303e-161	0.723943	0.364	0.132	4.55049e-157	BPs	ATCAY
AUTS2	4.61333e-149	0.722149	0.417	0.177	1.18401e-144	BPs	AUTS2
FAM171B	1.3692e-168	0.714655	0.281	0.079	3.51406e-164	BPs	FAM171B
BHLHE22	4.07462e-120	0.712755	0.324	0.128	1.04575e-115	BPs	BHLHE22
AGAP1.1	8.11807e-119	0.711152	0.644	0.424	2.0835e-114	BPs	AGAP1
MAPT	1.71868e-159	0.708687	0.336	0.113	4.41099e-155	BPs	MAPT
TLE1	2.6323e-120	0.70404	0.364	0.157	6.7558e-116	BPs	TLE1
PCSK1N.1	2.02993e-126	0.702916	0.543	0.295	5.20982e-122	BPs	PCSK1N
ACTC1	1.85878e-157	0.701632	0.254	0.067	4.77055e-153	BPs	ACTC1
JPT1	1.06165e-114	0.70159	0.667	0.456	2.72472e-110	BPs	JPT1
ESAM	0	0.70004	0.189	0.007	0	BPs	ESAM
VXN.4	1.92679e-38	-0.71149	0.218	0.351	4.94511e-34	BPs	VXN
CKAP4.1	1.69486e-80	-0.717107	0.285	0.492	4.34985e-76	BPs	CKAP4
ZIC2	1.0545e-89	-0.717756	0.235	0.467	2.70637e-85	BPs	ZIC2
SOX2.2	2.4612e-59	-0.719815	0.232	0.416	6.31666e-55	BPs	SOX2
MIR7-3HG.1	2.7066e-76	-0.723078	0.095	0.287	6.9465e-72	BPs	MIR7-3HG
TMX4.1	1.52532e-92	-0.723412	0.197	0.434	3.91474e-88	BPs	TMX4
TULP1.2	1.97581e-80	-0.723706	0.355	0.555	5.07093e-76	BPs	TULP1
NIPAL1.1	5.31815e-93	-0.728233	0.03	0.226	1.3649e-88	BPs	NIPAL1
IFT22	5.21009e-102	-0.730878	0.195	0.442	1.33717e-97	BPs	IFT22
ASCL1.2	4.42149e-52	-0.731755	0.14	0.302	1.13478e-47	BPs	ASCL1
RASD1	2.79214e-80	-0.733781	0.289	0.513	7.16603e-76	BPs	RASD1
PROM1	3.79117e-102	-0.73672	0.105	0.342	9.73005e-98	BPs	PROM1
CNGB1.2	3.51084e-77	-0.739271	0.046	0.224	9.01057e-73	BPs	CNGB1
TMEM108.1	2.06651e-118	-0.742357	0.052	0.297	5.30369e-114	BPs	TMEM108
MDK.4	2.47846e-30	-0.747655	0.259	0.376	6.36097e-26	BPs	MDK
FXYD1	4.74578e-101	-0.748633	0.159	0.404	1.21801e-96	BPs	FXYD1
JUNB	3.26273e-77	-0.751799	0.347	0.544	8.37379e-73	BPs	JUNB
S100A6.1	9.79441e-63	-0.75344	0.108	0.28	2.51374e-58	BPs	S100A6
EML1	6.52152e-114	-0.753528	0.174	0.439	1.67375e-109	BPs	EML1
BCL2L1.1	6.37872e-104	-0.754411	0.179	0.428	1.6371e-99	BPs	BCL2L1
MSI1	8.73343e-121	-0.761341	0.464	0.696	2.24144e-116	BPs	MSI1
DUSP1	2.56797e-68	-0.761451	0.545	0.679	6.59068e-64	BPs	DUSP1
INHBB.1	3.06242e-116	-0.763713	0.036	0.271	7.8597e-112	BPs	INHBB
ZBTB18.1	1.85767e-109	-0.763796	0.095	0.341	4.76771e-105	BPs	ZBTB18
DAPL1.1	3.27633e-91	-0.767004	0.189	0.422	8.40871e-87	BPs	DAPL1
HES5.3	1.58171e-12	-0.770736	0.126	0.189	4.05945e-08	BPs	HES5
GNG5.2	4.9641e-118	-0.771372	0.425	0.672	1.27404e-113	BPs	GNG5
PHLDA1.1	1.83884e-61	-0.774585	0.052	0.204	4.71938e-57	BPs	PHLDA1
LGI4	2.19934e-93	-0.778488	0.2	0.436	5.64462e-89	BPs	LGI4
MEIS2.1	1.58213e-121	-0.783994	0.236	0.518	4.06052e-117	BPs	MEIS2
MPPED2	1.92645e-130	-0.788558	0.411	0.662	4.94424e-126	BPs	MPPED2
SLC6A17.3	5.8952e-95	-0.791525	0.079	0.296	1.513e-90	BPs	SLC6A17
PDE6B.1	2.17869e-104	-0.801466	0.105	0.342	5.5916e-100	BPs	PDE6B
ADGRV1.2	7.33563e-110	-0.811486	0.166	0.422	1.88269e-105	BPs	ADGRV1
TMEM91.3	7.88221e-79	-0.817633	0.271	0.469	2.02297e-74	BPs	TMEM91
SYCE1L	3.85504e-114	-0.831305	0.09	0.341	9.89396e-110	BPs	SYCE1L
C11orf96.1	3.84302e-59	-0.835101	0.159	0.336	9.86311e-55	BPs	C11orf96
HEBP2	2.35654e-123	-0.835398	0.164	0.44	6.04805e-119	BPs	HEBP2
SELENOP	9.72489e-111	-0.842404	0.183	0.446	2.49589e-106	BPs	SELENOP
IMPG1.2	1.69091e-97	-0.847479	0.038	0.246	4.33971e-93	BPs	IMPG1
LRRC4C.1	5.95498e-114	-0.856017	0.118	0.374	1.52835e-109	BPs	LRRC4C
MAP1LC3B.2	2.66162e-130	-0.857131	0.566	0.734	6.83105e-126	BPs	MAP1LC3B
AHI1	2.7207e-138	-0.859987	0.261	0.546	6.98267e-134	BPs	AHI1
2004-09-01	3.54599e-125	-0.8699	0.274	0.544	9.10077e-121	BPs	2004-09-01
ID1	3.30876e-81	-0.879867	0.235	0.444	8.49194e-77	BPs	ID1
SIX6.2	1.48295e-136	-0.883018	0.457	0.678	3.80599e-132	BPs	SIX6
EYS.1	1.48118e-134	-0.883464	0.047	0.312	3.80145e-130	BPs	EYS
ISOC1.2	8.04386e-99	-0.892793	0.148	0.386	2.06446e-94	BPs	ISOC1
TLE3.2	1.01171e-127	-0.893655	0.234	0.519	2.59655e-123	BPs	TLE3
MYO9A.4	1.28821e-97	-0.894714	0.178	0.408	3.30618e-93	BPs	MYO9A
SLC2A1	2.96521e-135	-0.895061	0.243	0.528	7.61022e-131	BPs	SLC2A1
MATK.2	1.21126e-127	-0.897816	0.056	0.315	3.10869e-123	BPs	MATK
UBXN4.2	7.83991e-177	-0.900364	0.627	0.806	2.01211e-172	BPs	UBXN4
ROBO2.1	1.12621e-145	-0.909849	0.086	0.379	2.89042e-141	BPs	ROBO2
PGRMC2.1	1.67697e-159	-0.937129	0.338	0.632	4.30394e-155	BPs	PGRMC2
PLEKHB1.3	3.14216e-109	-0.937713	0.165	0.414	8.06435e-105	BPs	PLEKHB1
CRX.1	1.20143e-155	-0.939276	0.481	0.703	3.08346e-151	BPs	CRX
FAM57B.4	6.46701e-113	-0.947706	0.345	0.565	1.65976e-108	BPs	FAM57B
EPS8.4	2.86386e-144	-1.00577	0.139	0.436	7.3501e-140	BPs	EPS8
ANKRD33B.3	3.61827e-145	-1.02267	0.202	0.495	9.28628e-141	BPs	ANKRD33B
CASZ1.1	3.14606e-164	-1.03488	0.127	0.447	8.07437e-160	BPs	CASZ1
SLC38A5.1	1.25692e-159	-1.0605	0.211	0.524	3.22588e-155	BPs	SLC38A5
GNGT2.3	2.02091e-144	-1.07854	0.07	0.356	5.18667e-140	BPs	GNGT2
MAK.3	1.63685e-172	-1.08079	0.07	0.39	4.20098e-168	BPs	MAK
SAMD11.1	3.56889e-142	-1.08242	0.396	0.637	9.15956e-138	BPs	SAMD11
GNGT1	4.45984e-29	-1.08507	0.024	0.1	1.14462e-24	BPs	GNGT1
PDE6H.5	3.89156e-27	-1.09162	0.056	0.14	9.98769e-23	BPs	PDE6H
PKM.2	7.43015e-188	-1.09164	0.723	0.844	1.90695e-183	BPs	PKM
PRDX1.1	5.422e-258	-1.09241	0.652	0.846	1.39156e-253	BPs	PRDX1
MARCH1.2	5.09671e-169	-1.11823	0.19	0.509	1.30807e-164	BPs	2001-03-01
ARL4D.3	2.99393e-96	-1.12648	0.345	0.545	7.68393e-92	BPs	ARL4D
MPP4.4	5.03806e-141	-1.14073	0.051	0.325	1.29302e-136	BPs	MPP4
GADD45G.1	5.07912e-256	-1.14358	0.677	0.881	1.30356e-251	BPs	GADD45G
SLC40A1.2	4.16275e-175	-1.1449	0.068	0.393	1.06837e-170	BPs	SLC40A1
RBP3.2	1.45306e-176	-1.14916	0.103	0.438	3.72929e-172	BPs	RBP3
NTM.4	1.1704e-110	-1.1557	0.277	0.519	3.00383e-106	BPs	NTM
HIST1H1C.2	9.83409e-156	-1.1693	0.356	0.634	2.52392e-151	BPs	HIST1H1C
PTPN13.3	4.66369e-185	-1.19982	0.088	0.426	1.19694e-180	BPs	PTPN13
TMEM244.3	3.59107e-189	-1.20742	0.067	0.407	9.21648e-185	BPs	TMEM244
KCNV2.4	4.9458e-154	-1.21164	0.067	0.362	1.26934e-149	BPs	KCNV2
GNB3.5	1.17194e-213	-1.22048	0.714	0.809	3.00777e-209	BPs	GNB3
ZFP36L2.1	3.05998e-201	-1.24105	0.301	0.634	7.85343e-197	BPs	ZFP36L2
MRLN.3	4.49236e-190	-1.24985	0.118	0.462	1.15296e-185	BPs	MRLN
GNAT1.4	3.8667e-127	-1.27016	0.075	0.339	9.92387e-123	BPs	GNAT1
LOXL1.3	1.50165e-192	-1.28021	0.272	0.597	3.85399e-188	BPs	LOXL1
RRAD.2	2.23627e-130	-1.37019	0.091	0.359	5.73938e-126	BPs	RRAD
CDKN1C.2	8.4895e-200	-1.37285	0.249	0.583	2.17883e-195	BPs	CDKN1C
NEUROD1.2	0	-1.37515	0.727	0.944	0	BPs	NEUROD1
EPB41L2.3	4.43818e-228	-1.38392	0.3	0.638	1.13906e-223	BPs	EPB41L2
AMER2.2	0	-1.43049	0.539	0.856	0	BPs	AMER2
RXRG.1	3.80943e-242	-1.48276	0.13	0.527	9.77691e-238	BPs	RXRG
IMPG2.4	4.72189e-253	-1.48705	0.094	0.503	1.21187e-248	BPs	IMPG2
CHRNA3.1	0	-1.53826	0.106	0.569	0	BPs	CHRNA3
FAM161A.2	0	-1.59844	0.339	0.751	0	BPs	FAM161A
RAX2.3	1.17031e-238	-1.61985	0.133	0.525	3.00359e-234	BPs	RAX2
RAX.1	0	-1.65663	0.187	0.66	0	BPs	RAX
ROM1.4	4.79583e-231	-1.69141	0.41	0.682	1.23085e-226	BPs	ROM1
HES6.1	2.14535e-248	-1.69336	0.314	0.676	5.50603e-244	BPs	HES6
ATOH7.4	7.95719e-61	-1.72218	0.032	0.172	2.04221e-56	BPs	ATOH7
PRDM1.3	0	-1.7591	0.155	0.618	0	BPs	PRDM1
AL451062.1.3	1.31883e-275	-1.80872	0.264	0.658	3.38477e-271	BPs	AL451062.1
NR2E3.5	6.98345e-260	-1.84267	0.159	0.568	1.7923e-255	BPs	NR2E3
RP1.4	3.73251e-269	-1.92747	0.136	0.557	9.5795e-265	BPs	RP1
CRABP2.3	4.33978e-250	-2.01101	0.229	0.595	1.1138e-245	BPs	CRABP2
DCT.3	1.11299e-237	-2.17227	0.097	0.489	2.85649e-233	BPs	DCT
NRL.4	0	-2.25996	0.679	0.834	0	BPs	NRL
AIPL1.4	0	-2.42	0.317	0.772	0	BPs	AIPL1
PDC.4	0	-2.48388	0.251	0.712	0	BPs	PDC
RCVRN.4	0	-2.84852	0.498	0.832	0	BPs	RCVRN
GNGT1.1	0	3.18468	0.451	0.049	0	rods	GNGT1
GNAT1.5	0	2.16366	0.712	0.252	0	rods	GNAT1
CNGA1	0	2.08661	0.415	0.045	0	rods	CNGA1
ARL4D.4	0	1.89968	0.83	0.479	0	rods	ARL4D
SAG	0	1.80129	0.268	0.017	0	rods	SAG
CABP5.4	0	1.78038	0.649	0.229	0	rods	CABP5
RP1.5	0	1.75777	0.854	0.45	0	rods	RP1
RAX2.4	0	1.63994	0.829	0.423	0	rods	RAX2
ROM1.5	0	1.60776	0.938	0.606	0	rods	ROM1
PDE6G	1.35439e-273	1.57546	0.43	0.097	3.47605e-269	rods	PDE6G
CNGB1.3	6.14897e-258	1.54792	0.521	0.16	1.57813e-253	rods	CNGB1
KCNV2.5	6.12381e-207	1.53234	0.623	0.281	1.57168e-202	rods	KCNV2
UNC119.3	4.73012e-250	1.5214	0.853	0.595	1.21399e-245	rods	UNC119
GPR160.1	1.66524e-284	1.5013	0.496	0.131	4.27385e-280	rods	GPR160
RCVRN.5	0	1.48241	1	0.754	0	rods	RCVRN
GNB1	6.46256e-151	1.44671	0.628	0.396	1.65862e-146	rods	GNB1
IMPG1.3	2.11832e-164	1.43259	0.47	0.185	5.43666e-160	rods	IMPG1
PDC.5	0	1.41671	0.974	0.602	0	rods	PDC
NRL.5	0	1.40195	0.996	0.789	0	rods	NRL
NR2E3.6	4.66898e-265	1.3342	0.89	0.461	1.19829e-260	rods	NR2E3
NTM.5	5.85118e-209	1.33024	0.809	0.445	1.50171e-204	rods	NTM
AIPL1.5	0	1.32801	0.992	0.668	0	rods	AIPL1
CLUL1	0	1.31578	0.266	0.021	0	rods	CLUL1
GNGT2.4	5.42368e-147	1.22303	0.567	0.282	1.39199e-142	rods	GNGT2
MPP4.5	3.52314e-115	1.19866	0.51	0.256	9.04215e-111	rods	MPP4
YBX3	1.54696e-68	1.14088	0.442	0.275	3.97027e-64	rods	YBX3
SELENOK	4.94646e-120	1.13574	0.713	0.542	1.26951e-115	rods	SELENOK
SAMD11.2	1.09789e-151	1.13538	0.785	0.578	2.81773e-147	rods	SAMD11
CADM1	1.25016e-108	1.12121	0.72	0.612	3.20854e-104	rods	CADM1
SVIP	1.52196e-83	1.08169	0.284	0.109	3.90611e-79	rods	SVIP
CITED2.1	1.62945e-92	1.027	0.602	0.417	4.18199e-88	rods	CITED2
PDE4DIP.2	3.42522e-89	1.02566	0.493	0.284	8.79083e-85	rods	PDE4DIP
NIPAL1.2	3.44919e-102	1.02098	0.396	0.173	8.85235e-98	rods	NIPAL1
AF131216.1	6.71296e-191	1.01164	0.266	0.048	1.72288e-186	rods	AF131216.1
PLEKHB1.4	9.24217e-86	0.988612	0.558	0.354	2.372e-81	rods	PLEKHB1
DMD	3.62915e-92	0.982941	0.383	0.176	9.31422e-88	rods	DMD
MATK.3	1.1529e-89	0.964693	0.467	0.253	2.95893e-85	rods	MATK
ID1.1	1.14445e-57	0.940365	0.551	0.396	2.93724e-53	rods	ID1
RBP3.3	2.78597e-69	0.938932	0.548	0.366	7.15018e-65	rods	RBP3
LAPTM4B.2	2.64585e-123	0.93423	0.762	0.595	6.79056e-119	rods	LAPTM4B
LENG8	3.49462e-42	0.927542	0.381	0.252	8.96895e-38	rods	LENG8
REEP6.1	3.94271e-66	0.913713	0.428	0.256	1.0119e-61	rods	REEP6
PTPN13.4	1.98512e-97	0.909039	0.578	0.349	5.0948e-93	rods	PTPN13
ISOC1.3	2.56093e-85	0.906841	0.541	0.327	6.57264e-81	rods	ISOC1
SLC40A1.3	8.64847e-67	0.904344	0.503	0.323	2.21963e-62	rods	SLC40A1
PPP2R2B	1.09961e-95	0.890801	0.291	0.102	2.82215e-91	rods	PPP2R2B
EPB41L2.4	2.49235e-120	0.877141	0.794	0.561	6.39661e-116	rods	EPB41L2
GNB3.6	6.00834e-196	0.869066	0.978	0.774	1.54204e-191	rods	GNB3
RTBDN	3.80824e-99	0.849187	0.22	0.059	9.77386e-95	rods	RTBDN
MIR124-2HG.3	4.40508e-57	0.846081	0.517	0.363	1.13056e-52	rods	MIR124-2HG
ARL6IP5.3	9.68133e-74	0.84543	0.575	0.411	2.48471e-69	rods	ARL6IP5
EPS8.5	5.0738e-77	0.8235	0.567	0.369	1.30219e-72	rods	EPS8
DUSP1.1	2.33525e-75	0.820621	0.787	0.643	5.99343e-71	rods	DUSP1
TRAC	5.31239e-137	0.811664	0.24	0.054	1.36342e-132	rods	TRAC
CPLX4.2	1.71875e-66	0.805493	0.335	0.158	4.41116e-62	rods	CPLX4
ATP1B1	1.766e-53	0.805052	0.414	0.256	4.53243e-49	rods	ATP1B1
PRPH2	6.24625e-63	0.802329	0.363	0.193	1.6031e-58	rods	PRPH2
FAM161A.3	2.53568e-104	0.802139	0.826	0.67	6.50782e-100	rods	FAM161A
PRCD	6.91614e-51	0.799322	0.341	0.191	1.77503e-46	rods	PRCD
RS1	8.88126e-125	0.798938	0.231	0.054	2.27938e-120	rods	RS1
LRRC4C.2	1.52572e-47	0.797251	0.462	0.319	3.91577e-43	rods	LRRC4C
FOS.1	8.56626e-60	0.794	0.757	0.63	2.19853e-55	rods	FOS
BTBD8.3	1.75511e-80	0.791199	0.699	0.494	4.5045e-76	rods	BTBD8
CKAP4.2	1.33256e-56	0.786473	0.582	0.446	3.42002e-52	rods	CKAP4
RIMS2.3	1.81145e-58	0.781677	0.53	0.363	4.64908e-54	rods	RIMS2
DNAAF4	5.00973e-60	0.777925	0.276	0.123	1.28575e-55	rods	DNAAF4
DUSP2	4.59962e-34	0.776902	0.22	0.113	1.18049e-29	rods	DUSP2
MAK.4	2.66582e-56	0.775078	0.491	0.322	6.84183e-52	rods	MAK
SYCE1L.1	2.35712e-46	0.764941	0.431	0.286	6.04954e-42	rods	SYCE1L
SLC6A15	1.12994e-49	0.762577	0.343	0.196	2.89998e-45	rods	SLC6A15
HMGN2.1	2.09719e-161	0.761826	0.956	0.923	5.38244e-157	rods	HMGN2
PDE6B.2	1.49697e-45	0.760793	0.431	0.29	3.84198e-41	rods	PDE6B
LGALSL	1.46611e-50	0.758439	0.275	0.135	3.76278e-46	rods	LGALSL
IER2	3.45993e-50	0.75553	0.705	0.623	8.87991e-46	rods	IER2
CPE.1	5.38366e-97	0.752817	0.866	0.814	1.38172e-92	rods	CPE
UBAP1L	3.75345e-55	0.752519	0.238	0.102	9.63324e-51	rods	UBAP1L
ELOVL4	2.74545e-36	0.749501	0.304	0.185	7.0462e-32	rods	ELOVL4
ANXA4	2.05183e-60	0.745323	0.28	0.126	5.26603e-56	rods	ANXA4
CRX.2	4.44377e-75	0.745045	0.769	0.656	1.14049e-70	rods	CRX
TMEM244.4	1.87513e-45	0.723463	0.485	0.338	4.81252e-41	rods	TMEM244
LMO1	1.73012e-35	0.712976	0.343	0.223	4.44034e-31	rods	LMO1
TUBA1B.1	6.28326e-115	0.711296	0.915	0.825	1.6126e-110	rods	TUBA1B
IMPDH1	1.41135e-51	0.70452	0.258	0.12	3.62223e-47	rods	IMPDH1
RCOR2.1	3.84521e-62	-0.700736	0.045	0.265	9.86873e-58	rods	RCOR2
MIR7-3HG.2	9.1975e-63	-0.715198	0.052	0.278	2.36054e-58	rods	MIR7-3HG
TAGLN3.3	1.98933e-76	-0.719675	0.164	0.468	5.10562e-72	rods	TAGLN3
NAP1L1.1	1.27265e-79	-0.721799	0.466	0.749	3.26626e-75	rods	NAP1L1
BNIP3.1	1.40455e-55	-0.722054	0.303	0.562	3.60478e-51	rods	BNIP3
PRDM8.4	3.24081e-31	-0.732055	0.033	0.157	8.31755e-27	rods	PRDM8
PROX1.4	8.00763e-52	-0.750606	0.043	0.233	2.05516e-47	rods	PROX1
TUBA1A.2	6.15954e-95	-0.757037	0.808	0.931	1.58085e-90	rods	TUBA1A
PHLDA1.2	8.80132e-45	-0.757857	0.031	0.195	2.25886e-40	rods	PHLDA1
ASCL1.3	1.09709e-45	-0.775074	0.097	0.295	2.81569e-41	rods	ASCL1
FEZF2.4	1.83783e-44	-0.788639	0.038	0.202	4.71678e-40	rods	FEZF2
SSTR2.3	5.40333e-59	-0.789282	0.036	0.241	1.38676e-54	rods	SSTR2
BASP1.3	1.1058e-81	-0.814144	0.337	0.655	2.83802e-77	rods	BASP1
ALDOA.1	3.1393e-25	-0.814611	0.075	0.194	8.057e-21	rods	ALDOA
ATP5A1.1	4.88011e-26	-0.824764	0.008	0.1	1.25248e-21	rods	ATP5A1
CADPS.2	3.12151e-59	-0.828456	0.385	0.624	8.01136e-55	rods	CADPS
ZEB2.1	7.05485e-89	-0.838383	0.176	0.503	1.81063e-84	rods	ZEB2
NEUROD4.2	6.50227e-83	-0.847243	0.674	0.851	1.66881e-78	rods	NEUROD4
FAM131C.4	6.80061e-46	-0.860889	0.021	0.182	1.74538e-41	rods	FAM131C
TCF4.3	4.08219e-76	-0.873995	0.243	0.544	1.04769e-71	rods	TCF4
CADM3.1	3.70737e-105	-0.889813	0.157	0.516	9.51497e-101	rods	CADM3
MT-CO1	9.38035e-167	-0.900923	0.942	0.979	2.40747e-162	rods	MT-CO1
ATP5G2.1	1.66485e-26	-0.903028	0.008	0.101	4.27285e-22	rods	ATP5G2
TUBB2B.3	1.32726e-120	-0.903735	0.646	0.877	3.40641e-116	rods	TUBB2B
H1F0.2	5.82224e-80	-0.908337	0.088	0.371	1.49428e-75	rods	H1F0
VSX2.4	1.12339e-64	-0.922103	0.058	0.285	2.88319e-60	rods	VSX2
HES6.2	6.28601e-52	-0.945027	0.402	0.64	1.6133e-47	rods	HES6
RORB.2	5.51113e-99	-0.952002	0.727	0.901	1.41443e-94	rods	RORB
CD24.4	1.47038e-77	-0.952307	0.214	0.518	3.77372e-73	rods	CD24
MEG3.3	2.30949e-81	-1.02647	0.103	0.393	5.92731e-77	rods	MEG3
NFIB.3	7.13398e-74	-1.03789	0.191	0.467	1.83094e-69	rods	NFIB
VXN.5	7.133e-78	-1.0757	0.085	0.356	1.83068e-73	rods	VXN
NNAT.2	3.13862e-129	-1.08176	0.451	0.802	8.05526e-125	rods	NNAT
DCT.4	9.55205e-48	-1.19405	0.238	0.446	2.45153e-43	rods	DCT
MDK.5	2.34807e-76	-1.20893	0.111	0.384	6.02632e-72	rods	MDK
RBP1.4	3.22338e-163	-1.21426	0.537	0.853	8.2728e-159	rods	RBP1
DLL3.3	5.18608e-107	-1.23962	0.055	0.379	1.33101e-102	rods	DLL3
PCP2.4	1.99519e-30	-1.2467	0.03	0.149	5.12066e-26	rods	PCP2
RGS16.4	1.08346e-85	-1.36594	0.113	0.412	2.78069e-81	rods	RGS16
MIAT.3	2.94972e-95	-1.37556	0.067	0.37	7.57045e-91	rods	MIAT
GNB2L1.1	6.40769e-27	-1.4617	0.008	0.103	1.64453e-22	rods	GNB2L1
CSRP2.6	1.59998e-111	-1.55505	0.165	0.517	4.10634e-107	rods	CSRP2
ATOH7.5	4.06109e-34	-1.6099	0.032	0.162	1.04228e-29	rods	ATOH7
VSX1.6	1.49526e-40	-1.69058	0.037	0.188	3.83759e-36	rods	VSX1
FABP7.4	4.65966e-126	-1.97276	0.668	0.836	1.1959e-121	rods	FABP7
