# Supplementary material for: Spatiotemporal single cell analyses reveal a transient population of retinal progenitor cells in the ciliary margin of developing human retina
Source: Research Square preprint supplement (doi:10.21203/rs.3.rs-3160527/v1), 2023-07-13
Supplement: Supplementary file 4 [file 87f61de74f4486a48797d731.xlsx]

## Sheet: Sample Overview
Overview of human eye samples used for spatial transcriptiomics.Samples were profiled to a mean depth of 8543,21 counts per cell and 2249,11 genes per cell.
Sample	Stage (PCW)	Sex	Section	Number Of Spot per Section	Median Number Of Genes per Spot	Mean Number Reads per Spots
15817	8	male	A1	447	2560	9574.83
			B1	450	2350.5	9735.62
			C1	389	1750	5689.36
			D1	504	2192.5	7755.82
15870	10		A1	1181	1712	3525.82
			B1	1222	1579	3138.58
			C1	1212	1339	2591.87
			D1	1188	1700	3331.27
15685	11	female	A1	1154	1348	6049.62
			B1	1181	1400	6177.98
			C1	976	1112.5	5340.84
			D1	1060	995	4778.55
14749	13	male	A1	11224	1256	4077.63
			B1	1183	1237	3994.09
			C1	1153	1221	4368.82
			D1	1295	1086	3496.99

## Sheet: PCW8_15817
ST: 15817; 8 PCW
	p_val	avg_log2FC	pct.1	pct.2	p_val_adj	cluster	gene	Symbol	cell fate
1	4.95e-68	3.49746	0.786	0.68	1.66e-63	0	ENSG00000131711	MAP1B	Vitreous
2	5.01e-60	3.49357	0.646	0.348	1.68e-55	0	ENSG00000281508	AL078639.1	Vitreous
3	2.75e-37	3.09528	0.457	0.203	9.21e-33	0	ENSG00000151233	GXYLT1	Vitreous
4	2.08e-34	3.0698	0.689	0.704	6.98e-30	0	ENSG00000136938	ANP32B	Vitreous
5	1.33e-30	3.0677	0.511	0.318	4.47e-26	0	ENSG00000123200	ZC3H13	Vitreous
6	7.61e-09	2.98174	0.42	0.749	0.000255197	0	ENSG00000198786	MT-ND5	Vitreous
7	2.07e-57	2.93453	0.246	0.819	6.93e-53	0	ENSG00000186010	NDUFA13	Vitreous
8	2.17e-26	2.73058	0.683	0.818	7.27e-22	0	ENSG00000115053	NCL	Vitreous
9	1.26e-61	2.69236	0.817	0.956	4.21e-57	0	ENSG00000187109	NAP1L1	Vitreous
10	7.23e-15	2.61914	0.44	0.335	2.42e-10	0	ENSG00000148516	ZEB1	Vitreous
11	3.94e-70	2.52326	0.854	0.743	1.32e-65	0	ENSG00000269028	MTRNR2L12	Vitreous
12	7.44e-15	2.32478	0.449	0.347	2.5e-10	0	ENSG00000064393	HIPK2	Vitreous
13	5.66e-10	2.22474	0.383	0.302	1.9e-05	0	ENSG00000270647	TAF15	Vitreous
14	9.19e-20	2.10165	0.334	0.162	3.08e-15	0	ENSG00000198826	ARHGAP11A	Vitreous
15	3.11e-34	2.05323	0.749	0.958	1.04e-29	0	ENSG00000096384	HSP90AB1	Vitreous
16	1.22e-07	2.04539	0.326	0.249	0.00410065	0	ENSG00000137831	UACA	Vitreous
17	1.07e-29	2.01157	0.717	0.924	3.59e-25	0	ENSG00000070756	PABPC1	Vitreous
18	3.64e-05	1.97421	0.411	0.422	1	0	ENSG00000047410	TPR	Vitreous
19	0.000687083	1.95954	0.463	0.551	1	0	ENSG00000107581	EIF3A	Vitreous
20	1.41e-05	1.9402	0.446	0.475	0.471452	0	ENSG00000173473	SMARCC1	Vitreous
21	1.56e-19	1.90854	0.057	0.296	5.22e-15	0	ENSG00000103051	COG4	Vitreous
22	2.52e-23	1.82133	0.014	0.262	8.45e-19	0	ENSG00000160963	COL26A1	Vitreous
23	1.86e-20	1.79735	0.083	0.351	6.24e-16	0	ENSG00000134759	ELP2	Vitreous
24	8.04e-11	1.78371	0.631	0.648	2.7e-06	0	ENSG00000197943	PLCG2	Vitreous
25	2.38e-25	1.78323	0.066	0.36	7.98e-21	0	ENSG00000172172	MRPL13	Vitreous
26	2.02e-08	1.74793	0.374	0.31	0.000677089	0	ENSG00000198162	MAN1A2	Vitreous
27	1.73e-10	1.73847	0.22	0.108	5.8e-06	0	ENSG00000198157	HMGN5	Vitreous
28	0.00375504	1.68397	0.403	0.456	1	0	ENSG00000154380	ENAH	Vitreous
29	1.77e-08	1.65313	0.02	0.122	0.000594719	0	ENSG00000175287	PHYHD1	Vitreous
30	2e-13	1.62103	0.623	0.826	6.71e-09	0	ENSG00000119335	SET	Vitreous
31	0.00537047	1.6126	0.306	0.297	1	0	ENSG00000158417	EIF5B	Vitreous
32	2.92e-08	1.59521	0.043	0.158	0.000978874	0	ENSG00000133424	LARGE1	Vitreous
33	7.35e-08	1.57143	0.237	0.144	0.00246367	0	ENSG00000165323	FAT3	Vitreous
34	4.04e-07	1.49444	0.266	0.183	0.013542	0	ENSG00000180354	MTURN	Vitreous
35	3.29e-11	1.44152	0.109	0.305	1.1e-06	0	ENSG00000173273	TNKS	Vitreous
36	2.07e-10	1.41019	0.069	0.219	6.95e-06	0	ENSG00000114446	IFT57	Vitreous
37	2.48e-13	1.37878	0.097	0.297	8.3e-09	0	ENSG00000092421	SEMA6A	Vitreous
38	3.06e-35	1.36229	0.177	0.019	1.03e-30	0	ENSG00000092853	CLSPN	Vitreous
39	0.00208288	1.34091	0.211	0.167	1	0	ENSG00000078177	N4BP2	Vitreous
40	0.000999811	1.3135	0.314	0.272	1	0	ENSG00000197061	HIST1H4C	Vitreous
41	1.25e-28	1.2933	0.794	0.977	4.18e-24	0	ENSG00000135486	HNRNPA1	Vitreous
42	7.91e-15	1.2631	0.537	0.425	2.65e-10	0	ENSG00000104435	STMN2	Vitreous
43	2.34e-06	1.21647	0.286	0.208	0.0785769	0	ENSG00000167232	ZNF91	Vitreous
44	1.24e-47	1.18726	0.851	0.986	4.14e-43	0	ENSG00000187514	PTMA	Vitreous
45	9.94e-07	1.15982	0.634	0.899	0.0333482	0	ENSG00000080824	HSP90AA1	Vitreous
46	1.24e-28	1.15396	0.114	0.462	4.16e-24	0	ENSG00000102226	USP11	Vitreous
47	0.000158916	1.13677	0.214	0.155	1	0	ENSG00000165288	BRWD3	Vitreous
48	0.000183425	1.12355	0.297	0.24	1	0	ENSG00000104722	NEFM	Vitreous
49	2.28e-08	1.11345	0.631	0.887	0.000764628	0	ENSG00000065978	YBX1	Vitreous
50	3.29e-05	1.10065	0.357	0.278	1	0	ENSG00000135406	PRPH	Vitreous
51	4.24e-26	1.07753	0.049	0.338	1.42e-21	0	ENSG00000109861	CTSC	Vitreous
52	7.76e-73	1.07454	0.929	0.996	2.6e-68	0	ENSG00000198918	RPL39	Vitreous
53	0.00368714	1.00285	0.34	0.555	1	0	ENSG00000100941	PNN	Vitreous
54	0.00425357	0.989516	0.223	0.354	1	0	ENSG00000117523	PRRC2C	Vitreous
55	2.81e-06	0.986747	0.034	0.12	0.0943555	0	ENSG00000250303	AP002884.1	Vitreous
56	4.67e-09	0.983295	0.094	0.247	0.00015647	0	ENSG00000205352	PRR13	Vitreous
57	0.000972215	0.974676	0.16	0.107	1	0	ENSG00000139971	ARMH4	Vitreous
58	0.00176402	0.95425	0.286	0.468	1	0	ENSG00000119707	RBM25	Vitreous
59	1.22e-25	0.940884	0.911	0.98	4.11e-21	0	ENSG00000198840	MT-ND3	Vitreous
60	0.00788542	0.928665	0.271	0.433	1	0	ENSG00000039560	RAI14	Vitreous
61	0.00378695	0.888615	0.374	0.653	1	0	ENSG00000164346	NSA2	Vitreous
62	0.00864073	0.88146	0.269	0.422	1	0	ENSG00000153914	SREK1	Vitreous
63	7.63e-06	0.861645	0.069	0.17	0.256032	0	ENSG00000196199	MPHOSPH8	Vitreous
64	4.33e-13	0.859738	0.1	0.302	1.45e-08	0	ENSG00000019995	ZRANB1	Vitreous
65	2.72e-31	0.857976	0.903	0.992	9.12e-27	0	ENSG00000198899	MT-ATP6	Vitreous
66	4.66e-18	0.851145	0.049	0.27	1.56e-13	0	ENSG00000130706	ADRM1	Vitreous
67	0.000627174	0.847725	0.134	0.083	1	0	ENSG00000139613	SMARCC2	Vitreous
68	1.98e-07	0.821543	0.729	0.934	0.00662773	0	ENSG00000198888	MT-ND1	Vitreous
69	1.77e-06	0.816136	0.286	0.531	0.0592692	0	ENSG00000135316	SYNCRIP	Vitreous
70	0.00115063	0.814863	0.249	0.185	1	0	ENSG00000277586	NEFL	Vitreous
71	0.000343657	0.812126	0.263	0.433	1	0	ENSG00000083896	YTHDC1	Vitreous
72	1.07e-24	0.809299	0.886	0.997	3.59e-20	0	ENSG00000198712	MT-CO2	Vitreous
73	2.13e-05	0.804725	0.289	0.513	0.713316	0	ENSG00000164985	PSIP1	Vitreous
74	5.96e-11	0.802821	0.1	0.283	2e-06	0	ENSG00000148943	LIN7C	Vitreous
75	2.57e-33	0.797655	0.923	0.997	8.63e-29	0	ENSG00000198938	MT-CO3	Vitreous
76	2.48e-13	0.795741	0.117	0.339	8.33e-09	0	ENSG00000029725	RABEP1	Vitreous
77	3.94e-18	0.788436	0.114	0.018	1.32e-13	0	ENSG00000099715	PCDH11Y	Vitreous
78	4.15e-14	0.777871	0.077	0.282	1.39e-09	0	ENSG00000133313	CNDP2	Vitreous
79	2.38e-51	0.769946	0.911	0.999	7.97e-47	0	ENSG00000213741	RPS29	Vitreous
80	2.45e-19	0.7617	0.106	0.376	8.21e-15	0	ENSG00000090238	YPEL3	Vitreous
81	9.3e-16	0.757055	0.089	0.313	3.12e-11	0	ENSG00000015171	ZMYND11	Vitreous
82	1.01e-06	0.755741	0.023	0.108	0.0337422	0	ENSG00000136643	RPS6KC1	Vitreous
83	0.00198522	0.751979	0.266	0.211	1	0	ENSG00000162374	ELAVL4	Vitreous
84	0.000178471	0.750698	0.3	0.49	1	0	ENSG00000212907	MT-ND4L	Vitreous
85	5.87e-20	0.748739	0.2	0.515	1.97e-15	0	ENSG00000184613	NELL2	Vitreous
86	1.54e-05	0.743141	0.071	0.167	0.515597	0	ENSG00000224531	SMIM13	Vitreous
87	3.92e-51	0.742838	0.909	0.998	1.31e-46	0	ENSG00000138326	RPS24	Vitreous
88	1.09e-16	0.737344	0.143	0.414	3.65e-12	0	ENSG00000179195	ZNF664	Vitreous
89	1.74e-07	0.730826	0.234	0.452	0.00584359	0	ENSG00000170275	CRTAP	Vitreous
90	9.98e-06	0.719213	0.246	0.436	0.33484	0	ENSG00000126777	KTN1	Vitreous
91	7.15e-25	0.713427	0.043	0.319	2.4e-20	0	ENSG00000206503	HLA-A	Vitreous
92	0.00102975	0.711716	0.163	0.273	1	0	ENSG00000054267	ARID4B	Vitreous
93	4.95e-48	0.710564	0.894	0.998	1.66e-43	0	ENSG00000177600	RPLP2	Vitreous
94	0.0077284	0.705226	0.151	0.242	1	0	ENSG00000101745	ANKRD12	Vitreous
95	8.79e-20	0.703332	0.86	0.992	2.95e-15	0	ENSG00000198886	MT-ND4	Vitreous
96	3.79e-07	0.701657	0.149	0.3	0.012699	0	ENSG00000167614	TTYH1	Vitreous
97	4.32e-08	0.700721	0.26	0.515	0.00145029	0	ENSG00000101132	PFDN4	Vitreous
98	1.01e-28	0.697143	0.057	0.375	3.4e-24	0	ENSG00000184787	UBE2G2	Vitreous
99	4.88e-05	0.692922	0.137	0.265	1	0	ENSG00000144674	GOLGA4	Vitreous
100	2.74e-10	0.691	0.08	0.243	9.18e-06	0	ENSG00000070081	NUCB2	Vitreous
101	6.23e-07	0.678173	0.031	0.124	0.0208952	0	ENSG00000108387	2004-09-01	Vitreous
102	2.83e-25	0.67724	0.866	0.992	9.48e-21	0	ENSG00000172809	RPL38	Vitreous
103	6.15e-21	0.673494	0.817	0.985	2.06e-16	0	ENSG00000166441	RPL27A	Vitreous
104	2.68e-17	0.667091	0.791	0.987	8.99e-13	0	ENSG00000131469	RPL27	Vitreous
105	4.57e-07	0.663419	0.229	0.442	0.0153283	0	ENSG00000086758	HUWE1	Vitreous
106	7.18e-06	0.661213	0.171	0.327	0.240964	0	ENSG00000170606	HSPA4	Vitreous
107	7.37e-29	0.656929	0.169	0.552	2.47e-24	0	ENSG00000204392	LSM2	Vitreous
108	8.82e-33	0.649076	0.883	0.996	2.96e-28	0	ENSG00000171858	RPS21	Vitreous
109	2.32e-06	0.648798	0.029	0.112	0.0778482	0	ENSG00000198719	DLL1	Vitreous
110	2.63e-10	0.640208	0.246	0.515	8.82e-06	0	ENSG00000149136	SSRP1	Vitreous
111	1.46e-05	0.635116	0.243	0.449	0.488386	0	ENSG00000113141	IK	Vitreous
112	6.25e-09	0.634579	0.083	0.23	0.000209617	0	ENSG00000023516	AKAP11	Vitreous
113	2.93e-10	0.633676	0.017	0.138	9.83e-06	0	ENSG00000021762	OSBPL5	Vitreous
114	3.75e-05	0.632267	0.183	0.331	1	0	ENSG00000139218	SCAF11	Vitreous
115	1.34e-06	0.62961	0.8	0.991	0.0448531	0	ENSG00000198727	MT-CYB	Vitreous
116	8.46e-20	0.626649	0.806	0.994	2.84e-15	0	ENSG00000125691	RPL23	Vitreous
117	2.52e-09	0.626167	0.146	0.331	8.44e-05	0	ENSG00000132688	NES	Vitreous
118	0.00157007	0.623675	0.36	0.592	1	0	ENSG00000137309	HMGA1	Vitreous
119	7.79e-08	0.618402	0.049	0.165	0.0026128	0	ENSG00000163681	SLMAP	Vitreous
120	2.61e-16	0.610149	0.329	0.713	8.76e-12	0	ENSG00000099783	HNRNPM	Vitreous
121	6.52e-15	0.609038	0.109	0.344	2.19e-10	0	ENSG00000136146	MED4	Vitreous
122	4.04e-08	0.607553	0.226	0.459	0.00135465	0	ENSG00000135720	DYNC1LI2	Vitreous
123	1.15e-33	0.604755	0.923	1	3.85e-29	0	ENSG00000145592	RPL37	Vitreous
124	1.47e-06	0.597605	0.12	0.253	0.0493923	0	ENSG00000005810	MYCBP2	Vitreous
125	1.68e-06	0.595186	0.226	0.424	0.0562343	0	ENSG00000117614	SYF2	Vitreous
126	5.13e-08	0.593763	0.054	0.17	0.00171935	0	ENSG00000148384	INPP5E	Vitreous
127	5.98e-19	0.590173	0.097	0.358	2.01e-14	0	ENSG00000174851	YIF1A	Vitreous
128	4.72e-08	0.582713	0.383	0.735	0.00158392	0	ENSG00000096746	HNRNPH3	Vitreous
129	6.93e-07	0.582478	0.251	0.47	0.0232474	0	ENSG00000170759	KIF5B	Vitreous
130	5.55e-19	0.58242	0.811	0.988	1.86e-14	0	ENSG00000008988	RPS20	Vitreous
131	8.28e-29	0.576426	0.926	0.999	2.78e-24	0	ENSG00000177954	RPS27	Vitreous
132	3.01e-33	0.575018	0.137	0.531	1.01e-28	0	ENSG00000107874	CUEDC2	Vitreous
133	0.000832107	0.572977	0.054	0.117	1	0	ENSG00000120251	GRIA2	Vitreous
134	7.99e-13	0.572465	0.769	0.968	2.68e-08	0	ENSG00000167552	TUBA1A	Vitreous
135	7.08e-08	0.571505	0.257	0.499	0.00237554	0	ENSG00000153147	SMARCA5	Vitreous
136	1.24e-08	0.571488	0.111	0.268	0.000415857	0	ENSG00000138398	PPIG	Vitreous
137	4.66e-07	0.563432	0.143	0.303	0.0156439	0	ENSG00000146463	ZMYM4	Vitreous
138	7.04e-26	0.56321	0.086	0.399	2.36e-21	0	ENSG00000174080	CTSF	Vitreous
139	0.000161051	0.562521	0.114	0.216	1	0	ENSG00000102781	KATNAL1	Vitreous
140	5.51e-29	0.559203	0.877	0.995	1.85e-24	0	ENSG00000105640	RPL18A	Vitreous
141	2.48e-05	0.555806	0.163	0.303	0.830276	0	ENSG00000048649	RSF1	Vitreous
142	4.53e-06	0.552498	0.114	0.051	0.152055	0	ENSG00000196418	ZNF124	Vitreous
143	4.44e-06	0.550278	0.211	0.385	0.148846	0	ENSG00000115561	CHMP3	Vitreous
144	6.45e-06	0.549671	0.44	0.821	0.216479	0	ENSG00000147677	EIF3H	Vitreous
145	4.73e-08	0.54866	0.243	0.465	0.00158521	0	ENSG00000078674	PCM1	Vitreous
146	3.6e-15	0.544256	0.309	0.676	1.21e-10	0	ENSG00000126756	UXT	Vitreous
147	5.06e-19	0.543638	0.814	0.994	1.7e-14	0	ENSG00000147604	RPL7	Vitreous
148	1.11e-09	0.543209	0.803	0.991	3.73e-05	0	ENSG00000188846	RPL14	Vitreous
149	2.67e-09	0.542696	0.037	0.162	8.94e-05	0	ENSG00000112893	MAN2A1	Vitreous
150	1.06e-05	0.541182	0.126	0.249	0.355304	0	ENSG00000139116	KIF21A	Vitreous
151	4.09e-15	0.541024	0.129	0.369	1.37e-10	0	ENSG00000133706	LARS	Vitreous
152	0.00018925	0.539074	0.037	0.103	1	0	ENSG00000180998	GPR137C	Vitreous
153	5.78e-18	0.537804	0.329	0.716	1.94e-13	0	ENSG00000122565	CBX3	Vitreous
154	2.83e-09	0.536081	0.217	0.438	9.48e-05	0	ENSG00000149187	CELF1	Vitreous
155	8.13e-14	0.533602	0.774	0.985	2.73e-09	0	ENSG00000170889	RPS9	Vitreous
156	0.00197106	0.533454	0.274	0.434	1	0	ENSG00000171634	BPTF	Vitreous
157	7.26e-05	0.532728	0.106	0.21	1	0	ENSG00000158526	TSR2	Vitreous
158	6.95e-05	0.532518	0.18	0.315	1	0	ENSG00000100592	DAAM1	Vitreous
159	5.37e-07	0.531315	0.16	0.319	0.018011	0	ENSG00000168461	RAB31	Vitreous
160	3.96e-13	0.52828	0.151	0.392	1.33e-08	0	ENSG00000173575	CHD2	Vitreous
161	0.000209736	0.527511	0.163	0.292	1	0	ENSG00000140259	MFAP1	Vitreous
162	9.36e-19	0.527276	0.88	0.998	3.14e-14	0	ENSG00000233927	RPS28	Vitreous
163	1e-35	0.526414	0.134	0.543	3.36e-31	0	ENSG00000178057	NDUFAF3	Vitreous
164	4.56e-18	0.526075	0.06	0.29	1.53e-13	0	ENSG00000145715	RASA1	Vitreous
165	1.34e-07	0.52127	0.183	0.371	0.00450674	0	ENSG00000171316	CHD7	Vitreous
166	5.28e-05	0.520893	0.117	0.231	1	0	ENSG00000165525	NEMF	Vitreous
167	1.13e-09	0.518901	0.457	0.857	3.78e-05	0	ENSG00000125534	PPDPF	Vitreous
168	4.01e-06	0.50758	0.274	0.508	0.134542	0	ENSG00000047849	MAP4	Vitreous
169	4.65e-05	0.507556	0.386	0.69	1	0	ENSG00000158164	TMSB15A	Vitreous
170	0.00594959	0.506496	0.109	0.069	1	0	ENSG00000128487	SPECC1	Vitreous
171	1.06e-05	0.504664	0.177	0.332	0.354431	0	ENSG00000134744	TUT4	Vitreous
172	1.71e-96	2.78325	0.955	0.415	5.73e-92	1	ENSG00000111341	MGP	periocular mesenchyme
173	1.41e-98	2.25702	1	0.74	4.72e-94	1	ENSG00000168542	COL3A1	periocular mesenchyme
174	1.37e-112	2.25448	0.852	0.206	4.59e-108	1	ENSG00000133110	POSTN	periocular mesenchyme
175	3.39e-103	2.20984	1	0.456	1.14e-98	1	ENSG00000011465	DCN	periocular mesenchyme
176	1.96e-122	2.20019	0.937	0.281	6.56e-118	1	ENSG00000189129	PLAC9	periocular mesenchyme
177	4.34e-102	2.0555	1	0.675	1.46e-97	1	ENSG00000100097	LGALS1	periocular mesenchyme
178	3.11e-111	2.00689	0.955	0.365	1.04e-106	1	ENSG00000087245	MMP2	periocular mesenchyme
179	2.08e-61	1.91986	0.861	0.461	6.99e-57	1	ENSG00000197747	S100A10	periocular mesenchyme
180	1.84e-102	1.87262	0.996	0.542	6.16e-98	1	ENSG00000077942	FBLN1	periocular mesenchyme
181	2.55e-93	1.83757	1	0.567	8.54e-89	1	ENSG00000163430	FSTL1	periocular mesenchyme
182	1.68e-66	1.82475	0.924	0.516	5.64e-62	1	ENSG00000197956	S100A6	periocular mesenchyme
183	4.53e-139	1.80959	0.673	0.065	1.52e-134	1	ENSG00000164920	OSR2	periocular mesenchyme
184	7.76e-84	1.79131	1	0.756	2.6e-79	1	ENSG00000164692	COL1A2	periocular mesenchyme
185	1.91e-81	1.76962	1	0.706	6.41e-77	1	ENSG00000108821	COL1A1	periocular mesenchyme
186	5.27e-104	1.75871	0.839	0.228	1.77e-99	1	ENSG00000163520	FBLN2	periocular mesenchyme
187	2.53e-97	1.69343	0.857	0.26	8.47e-93	1	ENSG00000137573	SULF1	periocular mesenchyme
188	2.52e-106	1.69312	0.928	0.283	8.44e-102	1	ENSG00000166482	MFAP4	periocular mesenchyme
189	1.47e-112	1.68623	0.843	0.185	4.92e-108	1	ENSG00000113083	LOX	periocular mesenchyme
190	2.36e-99	1.68479	0.991	0.429	7.93e-95	1	ENSG00000130635	COL5A1	periocular mesenchyme
191	1.31e-99	1.68324	0.843	0.219	4.39e-95	1	ENSG00000164932	CTHRC1	periocular mesenchyme
192	1.87e-90	1.66848	0.987	0.553	6.28e-86	1	ENSG00000117122	MFAP2	periocular mesenchyme
193	3.14e-79	1.5593	0.964	0.46	1.05e-74	1	ENSG00000163191	S100A11	periocular mesenchyme
194	3.07e-80	1.55203	0.857	0.295	1.03e-75	1	ENSG00000163359	COL6A3	periocular mesenchyme
195	2.42e-78	1.54698	0.883	0.369	8.1e-74	1	ENSG00000166147	FBN1	periocular mesenchyme
196	1.23e-88	1.51446	0.982	0.479	4.12e-84	1	ENSG00000204262	COL5A2	periocular mesenchyme
197	2.54e-79	1.48918	0.897	0.336	8.53e-75	1	ENSG00000120708	TGFBI	periocular mesenchyme
198	1.34e-91	1.44769	0.843	0.225	4.49e-87	1	ENSG00000084636	COL16A1	periocular mesenchyme
199	1.3e-66	1.43755	0.623	0.17	4.36e-62	1	ENSG00000158747	NBL1	periocular mesenchyme
200	1.64e-78	1.43313	0.839	0.274	5.49e-74	1	ENSG00000101825	MXRA5	periocular mesenchyme
201	3.71e-75	1.42933	0.879	0.346	1.24e-70	1	ENSG00000178695	KCTD12	periocular mesenchyme
202	2.27e-55	1.42332	0.951	0.585	7.62e-51	1	ENSG00000115461	IGFBP5	periocular mesenchyme
203	3.58e-71	1.42111	0.987	0.525	1.2e-66	1	ENSG00000115414	FN1	periocular mesenchyme
204	6.04e-84	1.41423	0.897	0.322	2.03e-79	1	ENSG00000137070	IL11RA	periocular mesenchyme
205	2.66e-73	1.40812	0.942	0.452	8.91e-69	1	ENSG00000142173	COL6A2	periocular mesenchyme
206	2.49e-73	1.37685	1	0.739	8.35e-69	1	ENSG00000113140	SPARC	periocular mesenchyme
207	4.02e-66	1.32399	0.664	0.194	1.35e-61	1	ENSG00000115884	SDC1	periocular mesenchyme
208	1.2e-64	1.31739	0.892	0.461	4.04e-60	1	ENSG00000143320	CRABP2	periocular mesenchyme
209	6.82e-78	1.31672	0.713	0.184	2.29e-73	1	ENSG00000116132	PRRX1	periocular mesenchyme
210	2.99e-82	1.31581	0.798	0.231	1e-77	1	ENSG00000140092	FBLN5	periocular mesenchyme
211	1.71e-59	1.31549	0.915	0.587	5.75e-55	1	ENSG00000142156	COL6A1	periocular mesenchyme
212	1.06e-43	1.30954	0.484	0.133	3.55e-39	1	ENSG00000167779	IGFBP6	periocular mesenchyme
213	5.32e-62	1.30604	0.735	0.24	1.78e-57	1	ENSG00000151617	EDNRA	periocular mesenchyme
214	3.08e-75	1.30075	0.587	0.118	1.03e-70	1	ENSG00000075223	SEMA3C	periocular mesenchyme
215	1.35e-74	1.2978	0.928	0.362	4.51e-70	1	ENSG00000111799	COL12A1	periocular mesenchyme
216	3.97e-95	1.25873	0.601	0.091	1.33e-90	1	ENSG00000184347	SLIT3	periocular mesenchyme
217	7.58e-57	1.25383	0.556	0.129	2.54e-52	1	ENSG00000106819	ASPN	periocular mesenchyme
218	1.05e-74	1.24058	0.848	0.313	3.52e-70	1	ENSG00000124942	AHNAK	periocular mesenchyme
219	1.32e-64	1.23664	0.964	0.674	4.42e-60	1	ENSG00000002586	CD99	periocular mesenchyme
220	1.38e-63	1.23242	0.803	0.311	4.64e-59	1	ENSG00000109099	PMP22	periocular mesenchyme
221	6.16e-61	1.19302	0.758	0.28	2.07e-56	1	ENSG00000160932	LY6E	periocular mesenchyme
222	1.05e-83	1.17662	0.61	0.112	3.51e-79	1	ENSG00000146592	CREB5	periocular mesenchyme
223	9.42e-80	1.17512	0.717	0.174	3.16e-75	1	ENSG00000172819	RARG	periocular mesenchyme
224	5.8e-49	1.16731	0.753	0.294	1.95e-44	1	ENSG00000078596	ITM2A	periocular mesenchyme
225	3.9e-51	1.16598	0.664	0.258	1.31e-46	1	ENSG00000160789	LMNA	periocular mesenchyme
226	1.09e-60	1.15969	0.744	0.253	3.66e-56	1	ENSG00000143387	CTSK	periocular mesenchyme
227	4.04e-59	1.15423	0.717	0.238	1.35e-54	1	ENSG00000112769	LAMA4	periocular mesenchyme
228	5.98e-84	1.15317	0.556	0.085	2e-79	1	ENSG00000104213	PDGFRL	periocular mesenchyme
229	9.57e-95	1.14392	0.413	0.027	3.21e-90	1	ENSG00000173698	ADGRG2	periocular mesenchyme
230	5.89e-61	1.14227	0.749	0.271	1.97e-56	1	ENSG00000142227	EMP3	periocular mesenchyme
231	4.83e-45	1.14139	0.825	0.368	1.62e-40	1	ENSG00000106809	OGN	periocular mesenchyme
232	2.86e-62	1.1216	0.623	0.149	9.59e-58	1	ENSG00000186340	THBS2	periocular mesenchyme
233	7.34e-52	1.11731	0.771	0.312	2.46e-47	1	ENSG00000144857	BOC	periocular mesenchyme
234	6.5e-56	1.11176	0.794	0.331	2.18e-51	1	ENSG00000180447	GAS1	periocular mesenchyme
235	5.93e-93	1.11154	0.511	0.057	1.99e-88	1	ENSG00000149451	ADAM33	periocular mesenchyme
236	1.24e-49	1.11046	0.605	0.204	4.14e-45	1	ENSG00000090006	LTBP4	periocular mesenchyme
237	2.5e-61	1.10851	0.969	0.668	8.4e-57	1	ENSG00000110651	CD81	periocular mesenchyme
238	1.74e-43	1.08253	0.839	0.462	5.83e-39	1	ENSG00000038427	VCAN	periocular mesenchyme
239	1.3e-52	1.07942	0.726	0.255	4.34e-48	1	ENSG00000118257	NRP2	periocular mesenchyme
240	1.24e-72	1.07823	0.57	0.108	4.16e-68	1	ENSG00000124749	COL21A1	periocular mesenchyme
241	1.51e-42	1.06307	0.592	0.194	5.06e-38	1	ENSG00000122176	FMOD	periocular mesenchyme
242	8.74e-55	1.05811	0.57	0.156	2.93e-50	1	ENSG00000134013	LOXL2	periocular mesenchyme
243	9.91e-54	1.05335	0.821	0.364	3.32e-49	1	ENSG00000077782	FGFR1	periocular mesenchyme
244	2.38e-57	1.05257	0.785	0.284	8e-53	1	ENSG00000116774	OLFML3	periocular mesenchyme
245	4.96e-47	1.05156	0.578	0.188	1.66e-42	1	ENSG00000156103	MMP16	periocular mesenchyme
246	3.83e-66	1.03636	0.673	0.179	1.28e-61	1	ENSG00000183798	EMILIN3	periocular mesenchyme
247	2.31e-69	1.03427	0.641	0.138	7.74e-65	1	ENSG00000185559	DLK1	periocular mesenchyme
248	8.78e-63	1.03258	0.735	0.246	2.94e-58	1	ENSG00000169184	MN1	periocular mesenchyme
249	1.31e-53	1.02589	0.924	0.551	4.41e-49	1	ENSG00000118971	CCND2	periocular mesenchyme
250	1.59e-43	1.02272	0.668	0.278	5.32e-39	1	ENSG00000182580	EPHB3	periocular mesenchyme
251	4.16e-49	1.01139	0.762	0.297	1.39e-44	1	ENSG00000049323	LTBP1	periocular mesenchyme
252	7.61e-47	0.996634	0.592	0.198	2.55e-42	1	ENSG00000135269	TES	periocular mesenchyme
253	4.21e-40	0.977344	0.565	0.197	1.41e-35	1	ENSG00000128573	FOXP2	periocular mesenchyme
254	5.35e-53	0.965387	0.771	0.29	1.79e-48	1	ENSG00000134853	PDGFRA	periocular mesenchyme
255	1.84e-51	0.964716	0.731	0.294	6.18e-47	1	ENSG00000125844	RRBP1	periocular mesenchyme
256	2.47e-56	0.9629	1	0.939	8.3e-52	1	ENSG00000026025	VIM	periocular mesenchyme
257	2.45e-41	0.959093	0.444	0.117	8.23e-37	1	ENSG00000154734	ADAMTS1	periocular mesenchyme
258	9.54e-47	0.954061	0.794	0.334	3.2e-42	1	ENSG00000189184	PCDH18	periocular mesenchyme
259	1.16e-51	0.952846	0.534	0.128	3.89e-47	1	ENSG00000169908	TM4SF1	periocular mesenchyme
260	1.18e-57	0.950795	0.605	0.15	3.94e-53	1	ENSG00000122691	TWIST1	periocular mesenchyme
261	2.33e-43	0.940783	0.901	0.51	7.82e-39	1	ENSG00000149257	SERPINH1	periocular mesenchyme
262	6.12e-44	0.940444	0.839	0.418	2.05e-39	1	ENSG00000106333	PCOLCE	periocular mesenchyme
263	3.7e-39	0.935711	0.919	0.621	1.24e-34	1	ENSG00000185650	ZFP36L1	periocular mesenchyme
264	4.73e-47	0.931935	0.928	0.514	1.59e-42	1	ENSG00000138829	FBN2	periocular mesenchyme
265	1.09e-49	0.925603	0.641	0.202	3.66e-45	1	ENSG00000129009	ISLR	periocular mesenchyme
266	2.2e-46	0.914318	0.57	0.183	7.36e-42	1	ENSG00000114251	WNT5A	periocular mesenchyme
267	8.73e-36	0.904428	0.61	0.219	2.93e-31	1	ENSG00000147257	GPC3	periocular mesenchyme
268	7.12e-47	0.896061	0.848	0.368	2.39e-42	1	ENSG00000049540	ELN	periocular mesenchyme
269	2.45e-42	0.895161	0.614	0.234	8.22e-38	1	ENSG00000158966	CACHD1	periocular mesenchyme
270	2.92e-35	0.885817	0.673	0.298	9.78e-31	1	ENSG00000020181	ADGRA2	periocular mesenchyme
271	1.01e-36	0.885179	0.704	0.372	3.38e-32	1	ENSG00000129116	PALLD	periocular mesenchyme
272	5.23e-69	0.881867	0.26	0.01	1.75e-64	1	ENSG00000164530	PI16	periocular mesenchyme
273	6.7e-48	0.881144	0.493	0.128	2.25e-43	1	ENSG00000136859	ANGPTL2	periocular mesenchyme
274	2.09e-54	0.874754	0.43	0.08	7.01e-50	1	ENSG00000255690	TRIL	periocular mesenchyme
275	3.04e-103	0.873671	0.377	0.014	1.02e-98	1	ENSG00000183770	FOXL2	periocular mesenchyme
276	2.55e-80	0.873448	0.368	0.026	8.57e-76	1	ENSG00000143867	OSR1	periocular mesenchyme
277	1.23e-39	0.871965	0.848	0.541	4.13e-35	1	ENSG00000035862	TIMP2	periocular mesenchyme
278	3.31e-42	0.869594	0.587	0.207	1.11e-37	1	ENSG00000232527	AC245595.1	periocular mesenchyme
279	5.77e-44	0.866876	0.646	0.24	1.94e-39	1	ENSG00000147862	NFIB	periocular mesenchyme
280	1.18e-41	0.866548	0.74	0.327	3.97e-37	1	ENSG00000169604	ANTXR1	periocular mesenchyme
281	3.86e-41	0.858973	0.848	0.497	1.3e-36	1	ENSG00000123384	LRP1	periocular mesenchyme
282	2.53e-49	0.851722	0.561	0.146	8.47e-45	1	ENSG00000069011	PITX1	periocular mesenchyme
283	7.37e-64	0.842461	0.493	0.087	2.47e-59	1	ENSG00000167157	PRRX2	periocular mesenchyme
284	3.99e-37	0.837286	0.78	0.42	1.34e-32	1	ENSG00000164111	ANXA5	periocular mesenchyme
285	3.63e-42	0.836275	0.565	0.191	1.22e-37	1	ENSG00000134247	PTGFRN	periocular mesenchyme
286	9.72e-61	0.833301	0.484	0.093	3.26e-56	1	ENSG00000087116	ADAMTS2	periocular mesenchyme
287	3.21e-34	0.833221	0.552	0.223	1.08e-29	1	ENSG00000138835	RGS3	periocular mesenchyme
288	7.41e-54	0.829964	0.52	0.112	2.49e-49	1	ENSG00000148935	GAS2	periocular mesenchyme
289	1.71e-42	0.825463	0.332	0.061	5.74e-38	1	ENSG00000170381	SEMA3E	periocular mesenchyme
290	3.65e-86	0.822528	0.395	0.028	1.22e-81	1	ENSG00000180318	ALX1	periocular mesenchyme
291	1.83e-35	0.821473	0.74	0.391	6.12e-31	1	ENSG00000083444	PLOD1	periocular mesenchyme
292	3.02e-58	0.811831	0.561	0.131	1.01e-53	1	ENSG00000183160	TMEM119	periocular mesenchyme
293	6.77e-42	0.809845	0.83	0.421	2.27e-37	1	ENSG00000141753	IGFBP4	periocular mesenchyme
294	2.47e-35	0.809269	0.668	0.299	8.29e-31	1	ENSG00000104870	FCGRT	periocular mesenchyme
295	3.76e-38	0.807782	0.552	0.198	1.26e-33	1	ENSG00000122694	GLIPR2	periocular mesenchyme
296	1.05e-40	0.807764	0.587	0.197	3.51e-36	1	ENSG00000146250	PRSS35	periocular mesenchyme
297	9.12e-37	0.806659	0.583	0.22	3.06e-32	1	ENSG00000168487	BMP1	periocular mesenchyme
298	2.14e-37	0.804855	0.874	0.558	7.18e-33	1	ENSG00000136240	KDELR2	periocular mesenchyme
299	1e-38	0.803994	0.426	0.103	3.36e-34	1	ENSG00000233608	TWIST2	periocular mesenchyme
300	7.75e-39	0.800267	0.673	0.281	2.6e-34	1	ENSG00000011028	MRC2	periocular mesenchyme
301	2.42e-41	0.789575	0.655	0.259	8.13e-37	1	ENSG00000124440	HIF3A	periocular mesenchyme
302	3.35e-53	0.787751	0.323	0.04	1.12e-48	1	ENSG00000116678	LEPR	periocular mesenchyme
303	2.69e-33	0.778179	0.798	0.478	9.03e-29	1	ENSG00000102265	TIMP1	periocular mesenchyme
304	2.08e-30	0.775979	0.448	0.153	6.99e-26	1	ENSG00000161638	ITGA5	periocular mesenchyme
305	5.97e-41	0.774345	0.52	0.146	2e-36	1	ENSG00000166250	CLMP	periocular mesenchyme
306	4.36e-22	0.773889	0.695	0.428	1.46e-17	1	ENSG00000091136	LAMB1	periocular mesenchyme
307	1.85e-37	0.768573	0.74	0.338	6.19e-33	1	ENSG00000100234	TIMP3	periocular mesenchyme
308	6.11e-45	0.768201	0.327	0.054	2.05e-40	1	ENSG00000187398	LUZP2	periocular mesenchyme
309	6.21e-51	0.767978	0.453	0.089	2.08e-46	1	ENSG00000165124	SVEP1	periocular mesenchyme
310	8.81e-20	0.765715	0.502	0.261	2.95e-15	1	ENSG00000148180	GSN	periocular mesenchyme
311	2.14e-63	0.765556	0.233	0.008	7.18e-59	1	ENSG00000006016	CRLF1	periocular mesenchyme
312	4.05e-35	0.756541	0.695	0.315	1.36e-30	1	ENSG00000082781	ITGB5	periocular mesenchyme
313	5.03e-37	0.755732	0.605	0.235	1.69e-32	1	ENSG00000167601	AXL	periocular mesenchyme
314	2.7e-36	0.754566	0.448	0.127	9.04e-32	1	ENSG00000168140	VASN	periocular mesenchyme
315	7.54e-26	0.74973	0.713	0.426	2.53e-21	1	ENSG00000196628	TCF4	periocular mesenchyme
316	2.33e-34	0.749465	0.686	0.282	7.83e-30	1	ENSG00000171812	COL8A2	periocular mesenchyme
317	1.74e-40	0.747262	0.314	0.051	5.84e-36	1	ENSG00000005102	MEOX1	periocular mesenchyme
318	2.2e-21	0.745882	0.439	0.195	7.39e-17	1	ENSG00000011201	ANOS1	periocular mesenchyme
319	3.23e-56	0.742665	0.372	0.05	1.08e-51	1	ENSG00000112837	TBX18	periocular mesenchyme
320	9.95e-34	0.741128	0.444	0.138	3.34e-29	1	ENSG00000100300	TSPO	periocular mesenchyme
321	5.11e-50	0.735416	0.43	0.084	1.71e-45	1	ENSG00000077274	CAPN6	periocular mesenchyme
322	4.7e-40	0.735248	0.408	0.095	1.58e-35	1	ENSG00000078098	FAP	periocular mesenchyme
323	2.69e-32	0.729996	0.821	0.49	9.03e-28	1	ENSG00000128595	CALU	periocular mesenchyme
324	1.07e-31	0.728381	0.57	0.244	3.58e-27	1	ENSG00000110811	P3H3	periocular mesenchyme
325	1.02e-40	0.724055	0.57	0.19	3.43e-36	1	ENSG00000197256	KANK2	periocular mesenchyme
326	8.65e-34	0.718902	0.874	0.593	2.9e-29	1	ENSG00000068697	LAPTM4A	periocular mesenchyme
327	6.93e-27	0.714597	0.709	0.42	2.32e-22	1	ENSG00000090863	GLG1	periocular mesenchyme
328	1.2e-16	0.714343	0.583	0.37	4.03e-12	1	ENSG00000115738	ID2	periocular mesenchyme
329	5.27e-40	0.711346	0.529	0.154	1.77e-35	1	ENSG00000120820	GLT8D2	periocular mesenchyme
330	1.56e-34	0.710765	0.3	0.058	5.22e-30	1	ENSG00000168477	TNXB	periocular mesenchyme
331	1.64e-35	0.710738	0.892	0.514	5.52e-31	1	ENSG00000135916	ITM2C	periocular mesenchyme
332	5.34e-43	0.709802	0.529	0.15	1.79e-38	1	ENSG00000165424	ZCCHC24	periocular mesenchyme
333	1.64e-29	0.704034	0.561	0.238	5.49e-25	1	ENSG00000146242	TPBG	periocular mesenchyme
334	1.47e-33	0.700263	0.543	0.215	4.92e-29	1	ENSG00000183722	LHFPL6	periocular mesenchyme
335	1.79e-38	0.69891	0.359	0.076	6.01e-34	1	ENSG00000168938	PPIC	periocular mesenchyme
336	1.65e-35	0.695777	0.426	0.112	5.54e-31	1	ENSG00000160801	PTH1R	periocular mesenchyme
337	4.04e-27	0.694449	0.583	0.265	1.36e-22	1	ENSG00000136732	GYPC	periocular mesenchyme
338	8.27e-22	0.694072	0.238	0.056	2.77e-17	1	ENSG00000240583	AQP1	periocular mesenchyme
339	5.06e-41	0.689418	0.471	0.124	1.7e-36	1	ENSG00000150961	SEC24D	periocular mesenchyme
340	1.47e-39	0.688574	0.565	0.181	4.91e-35	1	ENSG00000138080	EMILIN1	periocular mesenchyme
341	5.97e-37	0.685355	0.422	0.114	2e-32	1	ENSG00000166448	TMEM130	periocular mesenchyme
342	8.74e-68	0.68024	0.305	0.02	2.93e-63	1	ENSG00000136826	KLF4	periocular mesenchyme
343	1.2e-29	0.678958	0.43	0.14	4.01e-25	1	ENSG00000101955	SRPX	periocular mesenchyme
344	9.2e-23	0.678357	0.471	0.212	3.08e-18	1	ENSG00000143061	IGSF3	periocular mesenchyme
345	1.08e-32	0.678315	0.785	0.434	3.62e-28	1	ENSG00000139329	LUM	periocular mesenchyme
346	8.54e-29	0.677646	0.601	0.279	2.86e-24	1	ENSG00000165801	ARHGEF40	periocular mesenchyme
347	1.05e-17	0.67712	0.52	0.261	3.53e-13	1	ENSG00000164093	PITX2	periocular mesenchyme
348	2.41e-46	0.676664	0.345	0.057	8.08e-42	1	ENSG00000026508	CD44	periocular mesenchyme
349	1.48e-53	0.673758	0.309	0.034	4.95e-49	1	ENSG00000266524	GDF10	periocular mesenchyme
350	4.63e-33	0.670586	0.574	0.234	1.55e-28	1	ENSG00000164294	GPX8	periocular mesenchyme
351	1.22e-46	0.667536	0.269	0.029	4.09e-42	1	ENSG00000156427	FGF18	periocular mesenchyme
352	3.89e-38	0.66685	0.377	0.086	1.3e-33	1	ENSG00000107485	GATA3	periocular mesenchyme
353	1.02e-41	0.664746	0.453	0.11	3.41e-37	1	ENSG00000164741	DLC1	periocular mesenchyme
354	1.84e-08	0.663738	0.35	0.212	0.00061767	1	ENSG00000135919	SERPINE2	periocular mesenchyme
355	4.88e-26	0.659428	0.686	0.37	1.64e-21	1	ENSG00000134250	NOTCH2	periocular mesenchyme
356	4.55e-50	0.657379	0.381	0.062	1.53e-45	1	ENSG00000163145	C1QTNF7	periocular mesenchyme
357	9.66e-25	0.657103	0.892	0.611	3.24e-20	1	ENSG00000115457	IGFBP2	periocular mesenchyme
358	7.49e-26	0.656919	0.628	0.317	2.51e-21	1	ENSG00000106624	AEBP1	periocular mesenchyme
359	3.7e-27	0.655052	0.399	0.13	1.24e-22	1	ENSG00000135333	EPHA7	periocular mesenchyme
360	8.23e-33	0.654194	0.534	0.179	2.76e-28	1	ENSG00000198759	EGFL6	periocular mesenchyme
361	1.99e-38	0.65312	0.417	0.101	6.69e-34	1	ENSG00000134363	FST	periocular mesenchyme
362	6.68e-34	0.652393	0.484	0.146	2.24e-29	1	ENSG00000154864	PIEZO2	periocular mesenchyme
363	3.52e-34	0.650646	0.552	0.2	1.18e-29	1	ENSG00000197380	DACT3	periocular mesenchyme
364	1.46e-23	0.637625	0.682	0.393	4.88e-19	1	ENSG00000109113	RAB34	periocular mesenchyme
365	3.41e-36	0.636715	0.466	0.138	1.14e-31	1	ENSG00000198121	LPAR1	periocular mesenchyme
366	4.22e-28	0.636463	0.278	0.061	1.42e-23	1	ENSG00000134531	EMP1	periocular mesenchyme
367	1.88e-27	0.635567	0.417	0.138	6.3e-23	1	ENSG00000230630	DNM3OS	periocular mesenchyme
368	8.28e-31	0.634744	0.444	0.143	2.78e-26	1	ENSG00000115935	WIPF1	periocular mesenchyme
369	1.26e-28	0.631132	0.493	0.181	4.23e-24	1	ENSG00000128606	LRRC17	periocular mesenchyme
370	2.74e-58	0.629989	0.26	0.017	9.2e-54	1	ENSG00000106483	SFRP4	periocular mesenchyme
371	5.55e-43	0.625608	0.399	0.082	1.86e-38	1	ENSG00000122870	BICC1	periocular mesenchyme
372	5.08e-24	0.621989	0.843	0.618	1.7e-19	1	ENSG00000185624	P4HB	periocular mesenchyme
373	3.05e-27	0.621915	0.87	0.608	1.02e-22	1	ENSG00000269893	SNHG8	periocular mesenchyme
374	7.94e-32	0.621804	0.408	0.118	2.66e-27	1	ENSG00000169744	LDB2	periocular mesenchyme
375	3.63e-48	0.621605	0.377	0.063	1.22e-43	1	ENSG00000173068	BNC2	periocular mesenchyme
376	8.28e-22	0.621321	0.489	0.23	2.78e-17	1	ENSG00000126603	GLIS2	periocular mesenchyme
377	3.73e-25	0.618601	0.848	0.542	1.25e-20	1	ENSG00000130508	PXDN	periocular mesenchyme
378	9.37e-16	0.617594	0.543	0.315	3.14e-11	1	ENSG00000169855	ROBO1	periocular mesenchyme
379	2.66e-21	0.614937	0.628	0.368	8.93e-17	1	ENSG00000138674	SEC31A	periocular mesenchyme
380	2.94e-21	0.612439	0.354	0.124	9.87e-17	1	ENSG00000148175	STOM	periocular mesenchyme
381	1.17e-31	0.612252	0.22	0.032	3.93e-27	1	ENSG00000213145	CRIP1	periocular mesenchyme
382	1.61e-37	0.611771	0.457	0.119	5.4e-33	1	ENSG00000187955	COL14A1	periocular mesenchyme
383	4.37e-26	0.602863	0.955	0.777	1.47e-21	1	ENSG00000111678	C12orf57	periocular mesenchyme
384	6.37e-59	0.601294	0.529	0.108	2.14e-54	1	ENSG00000024422	EHD2	periocular mesenchyme
385	9.31e-40	0.601207	0.247	0.031	3.12e-35	1	ENSG00000196549	MME	periocular mesenchyme
386	3.37e-22	0.601173	0.605	0.331	1.13e-17	1	ENSG00000129353	SLC44A2	periocular mesenchyme
387	7.21e-35	0.599019	0.448	0.122	2.42e-30	1	ENSG00000176971	FIBIN	periocular mesenchyme
388	1.16e-21	0.598958	0.453	0.203	3.9e-17	1	ENSG00000127334	DYRK2	periocular mesenchyme
389	9.99e-29	0.597952	0.955	0.732	3.35e-24	1	ENSG00000135404	CD63	periocular mesenchyme
390	6.64e-26	0.597313	0.489	0.198	2.23e-21	1	ENSG00000107957	SH3PXD2A	periocular mesenchyme
391	8.71e-34	0.5961	0.359	0.08	2.92e-29	1	ENSG00000206384	COL6A6	periocular mesenchyme
392	6.7e-41	0.594621	0.327	0.054	2.25e-36	1	ENSG00000092607	TBX15	periocular mesenchyme
393	2.36e-25	0.590136	0.471	0.185	7.91e-21	1	ENSG00000071967	CYBRD1	periocular mesenchyme
394	9.15e-30	0.588837	0.43	0.133	3.07e-25	1	ENSG00000178882	RFLNA	periocular mesenchyme
395	3.49e-21	0.588556	0.435	0.184	1.17e-16	1	ENSG00000155760	FZD7	periocular mesenchyme
396	6.37e-23	0.586183	0.61	0.317	2.14e-18	1	ENSG00000196562	SULF2	periocular mesenchyme
397	1.07e-33	0.583546	0.309	0.064	3.59e-29	1	ENSG00000154654	NCAM2	periocular mesenchyme
398	2.71e-26	0.580924	0.632	0.316	9.08e-22	1	ENSG00000173848	NET1	periocular mesenchyme
399	2.22e-17	0.577593	0.52	0.284	7.44e-13	1	ENSG00000136205	TNS3	periocular mesenchyme
400	1.07e-30	0.576109	0.39	0.11	3.58e-26	1	ENSG00000159403	C1R	periocular mesenchyme
401	2.71e-20	0.576098	0.587	0.29	9.1e-16	1	ENSG00000060718	COL11A1	periocular mesenchyme
402	2.09e-21	0.575966	0.785	0.555	7.02e-17	1	ENSG00000163584	RPL22L1	periocular mesenchyme
403	1.4e-15	0.572877	0.439	0.209	4.71e-11	1	ENSG00000092758	COL9A3	periocular mesenchyme
404	0.000138952	0.572813	0.229	0.142	1	1	ENSG00000118785	SPP1	periocular mesenchyme
405	1.39e-19	0.572667	0.484	0.235	4.65e-15	1	ENSG00000166949	SMAD3	periocular mesenchyme
406	2.99e-19	0.572663	0.583	0.323	1e-14	1	ENSG00000141756	FKBP10	periocular mesenchyme
407	3.5e-38	0.571682	0.274	0.041	1.17e-33	1	ENSG00000154736	ADAMTS5	periocular mesenchyme
408	9.03e-19	0.571669	0.637	0.374	3.03e-14	1	ENSG00000162407	PLPP3	periocular mesenchyme
409	8e-33	0.571544	0.233	0.036	2.68e-28	1	ENSG00000147408	CSGALNACT1	periocular mesenchyme
410	3.42e-27	0.571046	0.91	0.643	1.15e-22	1	ENSG00000163479	SSR2	periocular mesenchyme
411	2.3e-22	0.570862	0.529	0.246	7.7e-18	1	ENSG00000091986	CCDC80	periocular mesenchyme
412	4.17e-37	0.570571	0.345	0.07	1.4e-32	1	ENSG00000183801	OLFML1	periocular mesenchyme
413	4.59e-18	0.569685	0.48	0.239	1.54e-13	1	ENSG00000142449	FBN3	periocular mesenchyme
414	8.49e-20	0.568804	0.578	0.287	2.85e-15	1	ENSG00000182492	BGN	periocular mesenchyme
415	1.51e-36	0.564759	0.372	0.086	5.07e-32	1	ENSG00000196159	FAT4	periocular mesenchyme
416	1.52e-21	0.558953	0.309	0.096	5.09e-17	1	ENSG00000125378	BMP4	periocular mesenchyme
417	2.31e-20	0.556913	0.57	0.311	7.75e-16	1	ENSG00000141696	P3H4	periocular mesenchyme
418	2.1e-44	0.556288	0.256	0.028	7.06e-40	1	ENSG00000119681	LTBP2	periocular mesenchyme
419	3.26e-26	0.555509	0.444	0.157	1.09e-21	1	ENSG00000135272	MDFIC	periocular mesenchyme
420	9.79e-18	0.555287	0.3	0.109	3.28e-13	1	ENSG00000127863	TNFRSF19	periocular mesenchyme
421	6.96e-21	0.554473	0.906	0.7	2.34e-16	1	ENSG00000102316	MAGED2	periocular mesenchyme
422	1.32e-22	0.551959	0.444	0.168	4.43e-18	1	ENSG00000106034	CPED1	periocular mesenchyme
423	6.24e-63	0.550007	0.22	0.006	2.09e-58	1	ENSG00000123610	TNFAIP6	periocular mesenchyme
424	2.09e-18	0.548799	0.283	0.089	7.02e-14	1	ENSG00000134533	RERG	periocular mesenchyme
425	1.4e-19	0.548776	0.466	0.209	4.71e-15	1	ENSG00000197321	SVIL	periocular mesenchyme
426	3.38e-23	0.546978	0.762	0.474	1.13e-18	1	ENSG00000155366	RHOC	periocular mesenchyme
427	4.04e-24	0.545294	0.363	0.116	1.35e-19	1	ENSG00000157613	CREB3L1	periocular mesenchyme
428	6.25e-23	0.545041	0.39	0.14	2.1e-18	1	ENSG00000183386	FHL3	periocular mesenchyme
429	3.4e-34	0.541158	1	0.871	1.14e-29	1	ENSG00000140264	SERF2	periocular mesenchyme
430	6.3e-17	0.539881	0.614	0.379	2.11e-12	1	ENSG00000166341	DCHS1	periocular mesenchyme
431	6.1e-23	0.537754	0.48	0.209	2.04e-18	1	ENSG00000155254	MARVELD1	periocular mesenchyme
432	8.04e-21	0.536754	0.318	0.105	2.7e-16	1	ENSG00000204291	COL15A1	periocular mesenchyme
433	3.18e-19	0.535867	0.448	0.207	1.07e-14	1	ENSG00000205978	NYNRIN	periocular mesenchyme
434	1.63e-32	0.533561	0.417	0.114	5.48e-28	1	ENSG00000177469	CAVIN1	periocular mesenchyme
435	2.49e-16	0.531434	0.466	0.236	8.35e-12	1	ENSG00000100968	NFATC4	periocular mesenchyme
436	4.32e-23	0.529125	0.996	0.828	1.45e-18	1	ENSG00000132475	H3F3B	periocular mesenchyme
437	8.69e-21	0.528159	0.646	0.355	2.91e-16	1	ENSG00000197043	ANXA6	periocular mesenchyme
438	1.41e-26	0.523678	0.3	0.075	4.73e-22	1	ENSG00000055813	CCDC85A	periocular mesenchyme
439	3.34e-21	0.523224	0.336	0.116	1.12e-16	1	ENSG00000044446	PHKA2	periocular mesenchyme
440	6.61e-16	0.522046	0.511	0.282	2.22e-11	1	ENSG00000196776	CD47	periocular mesenchyme
441	3.38e-19	0.521778	0.359	0.139	1.13e-14	1	ENSG00000182158	CREB3L2	periocular mesenchyme
442	3.08e-18	0.52127	0.583	0.34	1.03e-13	1	ENSG00000185070	FLRT2	periocular mesenchyme
443	2e-33	0.521072	0.332	0.072	6.7e-29	1	ENSG00000132622	HSPA12B	periocular mesenchyme
444	1.21e-20	0.520662	0.408	0.167	4.06e-16	1	ENSG00000182704	TSKU	periocular mesenchyme
445	2.95e-23	0.520464	0.587	0.293	9.91e-19	1	ENSG00000166025	AMOTL1	periocular mesenchyme
446	9.5e-18	0.5199	0.695	0.46	3.19e-13	1	ENSG00000135535	CD164	periocular mesenchyme
447	1.23e-24	0.518774	1	0.856	4.11e-20	1	ENSG00000110492	MDK	periocular mesenchyme
448	1.46e-21	0.518299	0.502	0.22	4.89e-17	1	ENSG00000145685	LHFPL2	periocular mesenchyme
449	3.82e-25	0.518184	0.583	0.269	1.28e-20	1	ENSG00000018408	WWTR1	periocular mesenchyme
450	1.03e-16	0.517011	0.354	0.144	3.45e-12	1	ENSG00000104368	PLAT	periocular mesenchyme
451	1.72e-23	0.514619	0.695	0.368	5.77e-19	1	ENSG00000140937	CDH11	periocular mesenchyme
452	7.9e-12	0.513282	0.426	0.244	2.65e-07	1	ENSG00000099250	NRP1	periocular mesenchyme
453	1.29e-15	0.512684	0.413	0.205	4.34e-11	1	ENSG00000197324	LRP10	periocular mesenchyme
454	2.7e-12	0.51162	0.448	0.261	9.04e-08	1	ENSG00000136068	FLNB	periocular mesenchyme
455	1.39e-14	0.511261	0.623	0.433	4.65e-10	1	ENSG00000186395	KRT10	periocular mesenchyme
456	5.07e-19	0.511056	0.444	0.2	1.7e-14	1	ENSG00000079150	FKBP7	periocular mesenchyme
457	1.62e-13	0.507276	0.377	0.184	5.44e-09	1	ENSG00000198832	SELENOM	periocular mesenchyme
458	2.71e-22	0.50666	0.372	0.129	9.08e-18	1	ENSG00000163638	ADAMTS9	periocular mesenchyme
459	5.37e-14	0.50542	0.471	0.271	1.8e-09	1	ENSG00000196937	FAM3C	periocular mesenchyme
460	7.65e-22	0.504286	0.368	0.124	2.57e-17	1	ENSG00000119147	C2orf40	periocular mesenchyme
461	2.73e-20	0.503805	0.534	0.26	9.16e-16	1	ENSG00000180340	FZD2	periocular mesenchyme
462	1.78e-18	0.503556	0.538	0.294	5.97e-14	1	ENSG00000087884	AAMDC	periocular mesenchyme
463	3.78e-27	0.502247	0.305	0.075	1.27e-22	1	ENSG00000172403	SYNPO2	periocular mesenchyme
464	1.59e-17	0.500817	0.641	0.407	5.32e-13	1	ENSG00000074842	MYDGF	periocular mesenchyme
465	2.04e-27	0.500407	0.323	0.084	6.85e-23	1	ENSG00000144668	ITGA9	periocular mesenchyme
466	3.7e-124	2.60489	0.977	0.348	1.24e-119	2	ENSG00000106809	OGN	periocular mesenchyme
467	1.52e-86	2.24382	0.679	0.154	5.11e-82	2	ENSG00000181195	PENK	periocular mesenchyme
468	1.07e-78	1.82284	1	0.74	3.6e-74	2	ENSG00000168542	COL3A1	periocular mesenchyme
469	1.57e-82	1.81291	0.982	0.527	5.27e-78	2	ENSG00000115414	FN1	periocular mesenchyme
470	4.38e-47	1.58126	0.674	0.233	1.47e-42	2	ENSG00000133110	POSTN	periocular mesenchyme
471	1.42e-70	1.50214	1	0.757	4.76e-66	2	ENSG00000164692	COL1A2	periocular mesenchyme
472	2.28e-66	1.45353	0.995	0.677	7.64e-62	2	ENSG00000100097	LGALS1	periocular mesenchyme
473	1.82e-80	1.43905	0.931	0.363	6.12e-76	2	ENSG00000111799	COL12A1	periocular mesenchyme
474	3.38e-71	1.40034	1	0.707	1.13e-66	2	ENSG00000108821	COL1A1	periocular mesenchyme
475	1.41e-50	1.38594	0.917	0.469	4.72e-46	2	ENSG00000011465	DCN	periocular mesenchyme
476	5.4e-67	1.34695	0.991	0.569	1.81e-62	2	ENSG00000163430	FSTL1	periocular mesenchyme
477	2.95e-56	1.33778	0.651	0.191	9.89e-52	2	ENSG00000109193	SULT1E1	periocular mesenchyme
478	5.03e-29	1.33629	0.555	0.268	1.69e-24	2	ENSG00000107562	CXCL12	periocular mesenchyme
479	1.91e-45	1.29788	0.702	0.323	6.42e-41	2	ENSG00000144857	BOC	periocular mesenchyme
480	8.08e-50	1.29229	0.596	0.197	2.71e-45	2	ENSG00000146250	PRSS35	periocular mesenchyme
481	2.14e-35	1.28314	0.716	0.39	7.19e-31	2	ENSG00000105894	PTN	periocular mesenchyme
482	1.6e-55	1.28276	0.55	0.131	5.37e-51	2	ENSG00000106819	ASPN	periocular mesenchyme
483	1.06e-47	1.25773	0.67	0.265	3.56e-43	2	ENSG00000118257	NRP2	periocular mesenchyme
484	1.18e-52	1.24355	0.651	0.214	3.97e-48	2	ENSG00000147257	GPC3	periocular mesenchyme
485	6.69e-44	1.19961	0.702	0.307	2.25e-39	2	ENSG00000049323	LTBP1	periocular mesenchyme
486	4.61e-43	1.14154	0.872	0.523	1.55e-38	2	ENSG00000138829	FBN2	periocular mesenchyme
487	2.27e-42	1.14043	0.688	0.299	7.62e-38	2	ENSG00000116774	OLFML3	periocular mesenchyme
488	4.51e-57	1.13705	1	0.74	1.51e-52	2	ENSG00000113140	SPARC	periocular mesenchyme
489	4.96e-46	1.12193	0.872	0.475	1.67e-41	2	ENSG00000163191	S100A11	periocular mesenchyme
490	2.47e-44	1.11634	0.468	0.121	8.29e-40	2	ENSG00000148935	GAS2	periocular mesenchyme
491	1.19e-36	1.10822	0.693	0.37	3.99e-32	2	ENSG00000140937	CDH11	periocular mesenchyme
492	1.69e-23	1.05318	0.183	0.031	5.65e-19	2	ENSG00000090382	LYZ	periocular mesenchyme
493	5.19e-70	1.05274	0.413	0.049	1.74e-65	2	ENSG00000170577	SIX2	periocular mesenchyme
494	2.02e-37	1.04289	0.385	0.095	6.77e-33	2	ENSG00000152785	BMP3	periocular mesenchyme
495	3.07e-33	1.03273	0.606	0.254	1.03e-28	2	ENSG00000164932	CTHRC1	periocular mesenchyme
496	2.72e-38	1.02271	0.72	0.349	9.13e-34	2	ENSG00000137070	IL11RA	periocular mesenchyme
497	2.27e-47	1.00746	0.477	0.119	7.6e-43	2	ENSG00000176971	FIBIN	periocular mesenchyme
498	3.32e-34	0.988762	0.661	0.301	1.11e-29	2	ENSG00000101825	MXRA5	periocular mesenchyme
499	8e-30	0.98704	0.601	0.289	2.68e-25	2	ENSG00000060718	COL11A1	periocular mesenchyme
500	4.44e-35	0.981096	0.353	0.081	1.49e-30	2	ENSG00000206384	COL6A6	periocular mesenchyme
501	3.94e-28	0.977534	0.606	0.295	1.32e-23	2	ENSG00000171812	COL8A2	periocular mesenchyme
502	3.76e-26	0.969012	0.615	0.314	1.26e-21	2	ENSG00000078596	ITM2A	periocular mesenchyme
503	1.36e-39	0.968817	0.477	0.137	4.55e-35	2	ENSG00000169908	TM4SF1	periocular mesenchyme
504	1.07e-27	0.95709	0.656	0.351	3.59e-23	2	ENSG00000180447	GAS1	periocular mesenchyme
505	1.35e-28	0.93081	0.56	0.25	4.54e-24	2	ENSG00000054598	FOXC1	periocular mesenchyme
506	8.43e-27	0.916468	0.706	0.427	2.83e-22	2	ENSG00000091136	LAMB1	periocular mesenchyme
507	3.03e-31	0.899664	0.716	0.363	1.02e-26	2	ENSG00000120708	TGFBI	periocular mesenchyme
508	6.64e-31	0.870249	0.757	0.431	2.23e-26	2	ENSG00000106333	PCOLCE	periocular mesenchyme
509	3.37e-34	0.855928	0.894	0.594	1.13e-29	2	ENSG00000115461	IGFBP5	periocular mesenchyme
510	1.1e-31	0.84919	0.427	0.134	3.68e-27	2	ENSG00000178882	RFLNA	periocular mesenchyme
511	6.72e-39	0.847746	0.33	0.065	2.25e-34	2	ENSG00000126778	SIX1	periocular mesenchyme
512	8.43e-61	0.840268	0.995	0.872	2.83e-56	2	ENSG00000140264	SERF2	periocular mesenchyme
513	2.5e-28	0.831825	0.44	0.158	8.39e-24	2	ENSG00000166250	CLMP	periocular mesenchyme
514	2.34e-20	0.828338	0.459	0.213	7.85e-16	2	ENSG00000128573	FOXP2	periocular mesenchyme
515	2.44e-20	0.821521	0.601	0.383	8.17e-16	2	ENSG00000134250	NOTCH2	periocular mesenchyme
516	4.86e-44	0.820026	0.995	0.838	1.63e-39	2	ENSG00000277443	MARCKS	periocular mesenchyme
517	2.07e-26	0.819705	0.427	0.155	6.95e-22	2	ENSG00000154864	PIEZO2	periocular mesenchyme
518	1.31e-20	0.797313	0.528	0.27	4.38e-16	2	ENSG00000140092	FBLN5	periocular mesenchyme
519	1.77e-19	0.79313	0.472	0.241	5.95e-15	2	ENSG00000150687	PRSS23	periocular mesenchyme
520	1.01e-40	0.792195	0.876	0.447	3.4e-36	2	ENSG00000130635	COL5A1	periocular mesenchyme
521	1.3e-28	0.790236	0.849	0.573	4.37e-24	2	ENSG00000117122	MFAP2	periocular mesenchyme
522	2.35e-25	0.7752	0.523	0.245	7.89e-21	2	ENSG00000180730	SHISA2	periocular mesenchyme
523	5.15e-17	0.771944	0.555	0.35	1.73e-12	2	ENSG00000162878	PKDCC	periocular mesenchyme
524	1.46e-13	0.768941	0.541	0.388	4.9e-09	2	ENSG00000162407	PLPP3	periocular mesenchyme
525	3.43e-18	0.767641	0.459	0.229	1.15e-13	2	ENSG00000129009	ISLR	periocular mesenchyme
526	1.45e-24	0.762156	0.638	0.397	4.87e-20	2	ENSG00000038382	TRIO	periocular mesenchyme
527	8.77e-18	0.761127	0.317	0.12	2.94e-13	2	ENSG00000159307	SCUBE1	periocular mesenchyme
528	3.13e-20	0.75294	0.752	0.658	1.05e-15	2	ENSG00000137409	MTCH1	periocular mesenchyme
529	6.22e-22	0.752677	0.417	0.167	2.09e-17	2	ENSG00000069011	PITX1	periocular mesenchyme
530	3.61e-41	0.750018	1	0.939	1.21e-36	2	ENSG00000026025	VIM	periocular mesenchyme
531	4.29e-21	0.746221	0.67	0.444	1.44e-16	2	ENSG00000141753	IGFBP4	periocular mesenchyme
532	7.31e-16	0.741336	0.408	0.197	2.45e-11	2	ENSG00000198759	EGFL6	periocular mesenchyme
533	3.92e-17	0.735517	0.399	0.189	1.32e-12	2	ENSG00000087303	NID2	periocular mesenchyme
534	1.1e-14	0.728658	0.408	0.214	3.69e-10	2	ENSG00000092758	COL9A3	periocular mesenchyme
535	1.14e-11	0.725428	0.353	0.195	3.81e-07	2	ENSG00000136040	PLXNC1	periocular mesenchyme
536	4.04e-23	0.722332	0.743	0.476	1.36e-18	2	ENSG00000038427	VCAN	periocular mesenchyme
537	8.89e-55	0.717596	0.234	0.013	2.98e-50	2	ENSG00000168779	SHOX2	periocular mesenchyme
538	5.42e-13	0.714357	0.642	0.527	1.82e-08	2	ENSG00000123384	LRP1	periocular mesenchyme
539	3.6e-22	0.708036	0.367	0.132	1.21e-17	2	ENSG00000187955	COL14A1	periocular mesenchyme
540	2.48e-20	0.703457	0.56	0.309	8.31e-16	2	ENSG00000160932	LY6E	periocular mesenchyme
541	3.19e-23	0.682861	0.647	0.324	1.07e-18	2	ENSG00000166482	MFAP4	periocular mesenchyme
542	7.65e-21	0.682647	0.303	0.097	2.57e-16	2	ENSG00000044524	EPHA3	periocular mesenchyme
543	9.47e-18	0.681878	0.569	0.358	3.17e-13	2	ENSG00000131477	RAMP2	periocular mesenchyme
544	4.99e-23	0.672209	0.862	0.701	1.67e-18	2	ENSG00000117519	CNN3	periocular mesenchyme
545	7.84e-20	0.671398	0.702	0.508	2.63e-15	2	ENSG00000128595	CALU	periocular mesenchyme
546	2.64e-19	0.66979	0.72	0.486	8.86e-15	2	ENSG00000143320	CRABP2	periocular mesenchyme
547	2.56e-15	0.667456	0.514	0.305	8.6e-11	2	ENSG00000142227	EMP3	periocular mesenchyme
548	1.07e-12	0.653301	0.505	0.348	3.6e-08	2	ENSG00000143013	LMO4	periocular mesenchyme
549	1.23e-23	0.649939	0.968	0.851	4.13e-19	2	ENSG00000251562	MALAT1	periocular mesenchyme
550	6.55e-15	0.647869	0.376	0.178	2.2e-10	2	ENSG00000106034	CPED1	periocular mesenchyme
551	1.76e-18	0.639822	0.683	0.495	5.89e-14	2	ENSG00000102265	TIMP1	periocular mesenchyme
552	8.54e-10	0.635681	0.472	0.344	2.86e-05	2	ENSG00000137166	FOXP4	periocular mesenchyme
553	1.06e-18	0.630284	0.537	0.269	3.55e-14	2	ENSG00000084636	COL16A1	periocular mesenchyme
554	2.21e-15	0.630145	0.5	0.27	7.41e-11	2	ENSG00000112769	LAMA4	periocular mesenchyme
555	1.97e-09	0.62429	0.477	0.355	6.6e-05	2	ENSG00000185070	FLRT2	periocular mesenchyme
556	1.72e-09	0.619893	0.459	0.327	5.78e-05	2	ENSG00000169855	ROBO1	periocular mesenchyme
557	4.55e-19	0.61347	0.858	0.688	1.52e-14	2	ENSG00000106484	MEST	periocular mesenchyme
558	5.55e-17	0.61258	0.252	0.082	1.86e-12	2	ENSG00000173376	NDNF	periocular mesenchyme
559	2.04e-12	0.611537	0.578	0.44	6.85e-08	2	ENSG00000186395	KRT10	periocular mesenchyme
560	5.07e-12	0.609023	0.39	0.224	1.7e-07	2	ENSG00000197380	DACT3	periocular mesenchyme
561	1.53e-20	0.594787	0.257	0.069	5.13e-16	2	ENSG00000176692	FOXC2	periocular mesenchyme
562	3.93e-13	0.593538	0.303	0.134	1.32e-08	2	ENSG00000119147	C2orf40	periocular mesenchyme
563	5.72e-10	0.592376	0.417	0.273	1.92e-05	2	ENSG00000147862	NFIB	periocular mesenchyme
564	1.34e-11	0.5903	0.367	0.195	4.49e-07	2	ENSG00000112699	GMDS	periocular mesenchyme
565	4.1e-20	0.58899	0.702	0.402	1.38e-15	2	ENSG00000087245	MMP2	periocular mesenchyme
566	2.35e-18	0.587996	0.128	0.018	7.89e-14	2	ENSG00000143546	S100A8	periocular mesenchyme
567	4.86e-06	0.583376	0.33	0.236	0.162862	2	ENSG00000150471	ADGRL3	periocular mesenchyme
568	6.65e-10	0.582579	0.472	0.331	2.23e-05	2	ENSG00000125844	RRBP1	periocular mesenchyme
569	2.08e-22	0.576541	0.541	0.229	6.98e-18	2	ENSG00000113083	LOX	periocular mesenchyme
570	3.33e-14	0.574544	0.505	0.314	1.12e-09	2	ENSG00000170017	ALCAM	periocular mesenchyme
571	6.44e-08	0.568245	0.335	0.204	0.00215954	2	ENSG00000128606	LRRC17	periocular mesenchyme
572	1.04e-12	0.56349	0.505	0.329	3.48e-08	2	ENSG00000204388	HSPA1B	periocular mesenchyme
573	2.72e-10	0.561349	0.312	0.163	9.12e-06	2	ENSG00000204472	AIF1	periocular mesenchyme
574	7.77e-07	0.557317	0.505	0.419	0.0260594	2	ENSG00000109113	RAB34	periocular mesenchyme
575	1.22e-12	0.554986	0.303	0.139	4.1e-08	2	ENSG00000163638	ADAMTS9	periocular mesenchyme
576	1.89e-09	0.554388	0.505	0.375	6.35e-05	2	ENSG00000197043	ANXA6	periocular mesenchyme
577	4.25e-12	0.554214	0.307	0.146	1.43e-07	2	ENSG00000112559	MDFI	periocular mesenchyme
578	2.69e-08	0.551794	0.385	0.248	0.000900973	2	ENSG00000168487	BMP1	periocular mesenchyme
579	3.03e-12	0.551498	0.537	0.358	1.02e-07	2	ENSG00000124942	AHNAK	periocular mesenchyme
580	2.34e-11	0.54995	0.532	0.394	7.85e-07	2	ENSG00000083857	FAT1	periocular mesenchyme
581	0.000103191	0.547637	0.431	0.375	1	2	ENSG00000058668	ATP2B4	periocular mesenchyme
582	4.94e-13	0.546966	0.619	0.401	1.66e-08	2	ENSG00000049540	ELN	periocular mesenchyme
583	6.73e-12	0.545902	0.472	0.278	2.26e-07	2	ENSG00000151617	EDNRA	periocular mesenchyme
584	7.21e-10	0.543465	0.248	0.11	2.42e-05	2	ENSG00000137801	THBS1	periocular mesenchyme
585	8.04e-11	0.54229	0.587	0.448	2.7e-06	2	ENSG00000164111	ANXA5	periocular mesenchyme
586	3.23e-11	0.54021	0.339	0.18	1.08e-06	2	ENSG00000118292	C1orf54	periocular mesenchyme
587	5.47e-30	0.53644	0.858	0.497	1.83e-25	2	ENSG00000204262	COL5A2	periocular mesenchyme
588	4.96e-14	0.535464	0.771	0.629	1.66e-09	2	ENSG00000102804	TSC22D1	periocular mesenchyme
589	2.81e-18	0.535112	0.835	0.688	9.44e-14	2	ENSG00000110651	CD81	periocular mesenchyme
590	2.63e-08	0.533854	0.28	0.152	0.000882563	2	ENSG00000150961	SEC24D	periocular mesenchyme
591	1.59e-23	0.532759	0.775	0.476	5.32e-19	2	ENSG00000142173	COL6A2	periocular mesenchyme
592	2.14e-16	0.53067	0.179	0.043	7.18e-12	2	ENSG00000017427	IGF1	periocular mesenchyme
593	1.27e-10	0.528505	0.528	0.382	4.25e-06	2	ENSG00000162576	MXRA8	periocular mesenchyme
594	1.05e-22	0.527106	0.743	0.479	3.52e-18	2	ENSG00000197747	S100A10	periocular mesenchyme
595	4.83e-18	0.525577	0.606	0.33	1.62e-13	2	ENSG00000189129	PLAC9	periocular mesenchyme
596	2.45e-16	0.523694	0.775	0.573	8.22e-12	2	ENSG00000118971	CCND2	periocular mesenchyme
597	5.9e-12	0.522968	0.339	0.172	1.98e-07	2	ENSG00000135272	MDFIC	periocular mesenchyme
598	6.11e-20	0.520564	0.211	0.049	2.05e-15	2	ENSG00000186564	FOXD2	periocular mesenchyme
599	6.48e-15	0.52006	0.817	0.684	2.17e-10	2	ENSG00000113387	SUB1	periocular mesenchyme
600	0.000391553	0.517383	0.399	0.357	1	2	ENSG00000114861	FOXP1	periocular mesenchyme
601	2.9e-11	0.516016	0.349	0.181	9.74e-07	2	ENSG00000120820	GLT8D2	periocular mesenchyme
602	4.48e-22	0.513115	0.252	0.06	1.5e-17	2	ENSG00000005102	MEOX1	periocular mesenchyme
603	1.64e-29	0.512688	0.995	0.947	5.49e-25	2	ENSG00000008988	RPS20	periocular mesenchyme
604	0.000662743	0.509941	0.33	0.279	1	2	ENSG00000109814	UGDH	periocular mesenchyme
605	1.15e-07	0.509904	0.482	0.392	0.00387306	2	ENSG00000189171	S100A13	periocular mesenchyme
606	2.94e-08	0.508495	0.307	0.18	0.000986718	2	ENSG00000146648	EGFR	periocular mesenchyme
607	1.16e-10	0.506916	0.257	0.113	3.9e-06	2	ENSG00000119699	TGFB3	periocular mesenchyme
608	3.25e-06	0.504881	0.472	0.403	0.109118	2	ENSG00000117114	ADGRL2	periocular mesenchyme
609	1.47e-06	0.503245	0.257	0.151	0.0493082	2	ENSG00000135333	EPHA7	periocular mesenchyme
610	1.14e-06	0.502541	0.339	0.223	0.0382019	2	ENSG00000156103	MMP16	periocular mesenchyme
611	2.01e-100	4.77707	1	0.605	6.73e-96	3	ENSG00000244752	CRYBB2	lens fibre
612	1.02e-110	4.73475	1	0.402	3.41e-106	3	ENSG00000163499	CRYBA2	lens fibre
613	2.36e-98	4.65279	1	0.657	7.92e-94	3	ENSG00000100122	CRYBB1	lens fibre
614	9.11e-103	4.64852	1	0.52	3.06e-98	3	ENSG00000118231	CRYGD	lens fibre
615	2.4e-100	4.64038	1	0.554	8.04e-96	3	ENSG00000196431	CRYBA4	lens fibre
616	7.52e-110	4.62692	1	0.425	2.52e-105	3	ENSG00000163254	CRYGC	lens fibre
617	1.26e-97	4.56468	1	0.653	4.23e-93	3	ENSG00000108255	CRYBA1	lens fibre
618	4.61e-104	4.48616	1	0.49	1.54e-99	3	ENSG00000213139	CRYGS	lens fibre
619	9.39e-100	4.38382	1	0.684	3.15e-95	3	ENSG00000109846	CRYAB	lens fibre
620	4.41e-111	4.33962	1	0.418	1.48e-106	3	ENSG00000145692	BHMT	lens fibre
621	1.5e-107	4.07368	1	0.468	5.03e-103	3	ENSG00000100053	CRYBB3	lens fibre
622	1.06e-160	3.7192	1	0.174	3.57e-156	3	ENSG00000105370	LIM2	lens fibre
623	5.89e-203	3.247	0.951	0.081	1.98e-198	3	ENSG00000135517	MIP	lens fibre
624	1.79e-116	3.01258	1	0.355	6.02e-112	3	ENSG00000196154	S100A4	lens fibre
625	4.88e-127	2.89576	0.957	0.215	1.64e-122	3	ENSG00000152583	SPARCL1	lens fibre
626	2.1e-209	2.85298	0.963	0.078	7.05e-205	3	ENSG00000257345	LINC02413	lens fibre
627	4.57e-111	2.40405	0.988	0.344	1.53e-106	3	ENSG00000124570	SERPINB6	lens fibre
628	3.29e-89	2.37157	0.994	0.708	1.1e-84	3	ENSG00000164687	FABP5	lens fibre
629	2.93e-71	2.30868	0.951	0.561	9.84e-67	3	ENSG00000109472	CPE	lens fibre
630	1.04e-113	2.27819	0.982	0.229	3.5e-109	3	ENSG00000165092	ALDH1A1	lens fibre
631	1.73e-247	2.23592	0.951	0.047	5.81e-243	3	ENSG00000121743	GJA3	lens fibre
632	1.18e-97	2.20028	0.927	0.262	3.94e-93	3	ENSG00000166033	HTRA1	lens fibre
633	3.45e-233	2.07194	0.89	0.041	1.16e-228	3	ENSG00000205221	VIT	lens fibre
634	2.99e-230	2.02398	0.823	0.029	1e-225	3	ENSG00000182187	CRYGB	lens fibre
635	1.23e-90	2.0207	0.921	0.29	4.13e-86	3	ENSG00000150938	CRIM1	lens fibre
636	3.64e-148	1.99576	0.933	0.14	1.22e-143	3	ENSG00000160307	S100B	lens fibre
637	2.15e-221	1.96309	0.909	0.051	7.22e-217	3	ENSG00000125864	BFSP1	lens fibre
638	1.86e-111	1.77051	0.927	0.22	6.25e-107	3	ENSG00000115129	TP53I3	lens fibre
639	2.6e-252	1.7548	0.878	0.028	8.71e-248	3	ENSG00000161798	AQP5	lens fibre
640	1.06e-75	1.74548	0.982	0.574	3.57e-71	3	ENSG00000171159	C9orf16	lens fibre
641	1.31e-179	1.72587	0.793	0.048	4.38e-175	3	ENSG00000182853	VMO1	lens fibre
642	2.48e-205	1.6987	0.866	0.053	8.31e-201	3	ENSG00000196116	TDRD7	lens fibre
643	5.49e-101	1.69083	0.878	0.208	1.84e-96	3	ENSG00000110888	CAPRIN2	lens fibre
644	6.72e-76	1.66657	0.994	0.586	2.26e-71	3	ENSG00000129757	CDKN1C	lens fibre
645	2.39e-90	1.65094	0.97	0.332	8.02e-86	3	ENSG00000178573	MAF	lens fibre
646	4.13e-176	1.64884	0.787	0.048	1.38e-171	3	ENSG00000186790	FOXE3	lens fibre
647	7.05e-91	1.55957	0.915	0.272	2.37e-86	3	ENSG00000167642	SPINT2	lens fibre
648	6.03e-42	1.47704	0.957	0.651	2.02e-37	3	ENSG00000117394	SLC2A1	lens fibre
649	4.05e-191	1.46684	0.884	0.065	1.36e-186	3	ENSG00000117707	PROX1	lens fibre
650	2.25e-185	1.4527	0.793	0.045	7.54e-181	3	ENSG00000047457	CP	lens fibre
651	9.3e-70	1.45	0.854	0.231	3.12e-65	3	ENSG00000092068	SLC7A8	lens fibre
652	6.06e-150	1.43526	0.561	0.02	2.03e-145	3	ENSG00000168582	CRYGA	lens fibre
653	5.36e-137	1.43243	0.866	0.116	1.8e-132	3	ENSG00000090530	P3H2	lens fibre
654	3.15e-104	1.42625	0.878	0.164	1.06e-99	3	ENSG00000132205	EMILIN2	lens fibre
655	1.26e-89	1.42521	0.896	0.229	4.22e-85	3	ENSG00000174136	RGMB	lens fibre
656	4.18e-72	1.41027	0.976	0.478	1.4e-67	3	ENSG00000205531	NAP1L4	lens fibre
657	1.5e-223	1.39979	0.799	0.026	5.04e-219	3	ENSG00000173890	GPR160	lens fibre
658	1.44e-68	1.3573	0.994	0.705	4.82e-64	3	ENSG00000089220	PEBP1	lens fibre
659	2.01e-126	1.35158	0.848	0.12	6.73e-122	3	ENSG00000166394	CYB5R2	lens fibre
660	6.12e-81	1.33737	0.835	0.21	2.05e-76	3	ENSG00000091129	NRCAM	lens fibre
661	1.37e-66	1.33236	0.994	0.745	4.6e-62	3	ENSG00000106211	HSPB1	lens fibre
662	5.79e-57	1.3312	0.915	0.488	1.94e-52	3	ENSG00000197982	C1orf122	lens fibre
663	3.46e-39	1.32632	0.902	0.535	1.16e-34	3	ENSG00000120885	CLU	lens fibre
664	2.9e-76	1.32292	0.817	0.191	9.72e-72	3	ENSG00000101384	JAG1	lens fibre
665	2.37e-102	1.3215	0.872	0.154	7.95e-98	3	ENSG00000170276	HSPB2	lens fibre
666	9.68e-146	1.29836	0.872	0.101	3.25e-141	3	ENSG00000131981	LGALS3	lens fibre
667	1.95e-94	1.26612	0.921	0.246	6.52e-90	3	ENSG00000108960	MMD	lens fibre
668	1.62e-260	1.24655	0.817	0.015	5.44e-256	3	ENSG00000257588	AC025154.2	lens fibre
669	6.75e-181	1.20759	0.683	0.026	2.26e-176	3	ENSG00000174403	MIR1-1HG-AS1	lens fibre
670	5.39e-226	1.20276	0.726	0.014	1.81e-221	3	ENSG00000276076	CRYAA2	lens fibre
671	3.15e-71	1.19842	0.726	0.178	1.06e-66	3	ENSG00000108679	LGALS3BP	lens fibre
672	4.99e-44	1.19762	0.909	0.472	1.67e-39	3	ENSG00000187498	COL4A1	lens fibre
673	1.36e-150	1.19429	0.585	0.023	4.57e-146	3	ENSG00000277893	SRD5A2	lens fibre
674	6.51e-45	1.19218	0.841	0.366	2.18e-40	3	ENSG00000182985	CADM1	lens fibre
675	2.79e-59	1.19198	0.927	0.372	9.35e-55	3	ENSG00000101198	NKAIN4	lens fibre
676	8.56e-91	1.18956	0.921	0.242	2.87e-86	3	ENSG00000100360	IFT27	lens fibre
677	7.75e-66	1.18456	0.988	0.764	2.6e-61	3	ENSG00000177700	POLR2L	lens fibre
678	8.19e-220	1.11763	0.665	0.008	2.75e-215	3	ENSG00000160202	CRYAA	lens fibre
679	1.32e-57	1.08696	0.921	0.454	4.43e-53	3	ENSG00000178127	NDUFV2	lens fibre
680	9.56e-107	1.0796	0.86	0.149	3.21e-102	3	ENSG00000117155	SSX2IP	lens fibre
681	4.68e-58	1.07933	0.945	0.426	1.57e-53	3	ENSG00000182534	MXRA7	lens fibre
682	1.02e-74	1.06918	0.866	0.238	3.44e-70	3	ENSG00000094975	SUCO	lens fibre
683	9.4e-153	1.06695	0.799	0.069	3.15e-148	3	ENSG00000184792	OSBP2	lens fibre
684	1.06e-134	1.06059	0.805	0.082	3.54e-130	3	ENSG00000164125	FAM198B	lens fibre
685	2.68e-95	1.05437	0.701	0.1	9e-91	3	ENSG00000198399	ITSN2	lens fibre
686	2.49e-47	1.0528	0.634	0.159	8.36e-43	3	ENSG00000003989	SLC7A2	lens fibre
687	3.93e-46	1.0404	0.841	0.341	1.32e-41	3	ENSG00000123989	CHPF	lens fibre
688	1.86e-58	1.03893	0.872	0.27	6.24e-54	3	ENSG00000163453	IGFBP7	lens fibre
689	5.75e-56	1.03713	0.927	0.411	1.93e-51	3	ENSG00000103187	COTL1	lens fibre
690	1.08e-189	1.0285	0.774	0.036	3.61e-185	3	ENSG00000105227	PRX	lens fibre
691	9.44e-120	1.00176	0.799	0.098	3.17e-115	3	ENSG00000112183	RBM24	lens fibre
692	1.56e-95	0.99902	0.732	0.111	5.24e-91	3	ENSG00000204103	MAFB	lens fibre
693	8.75e-70	0.998028	0.774	0.17	2.93e-65	3	ENSG00000068078	FGFR3	lens fibre
694	3.79e-59	0.985523	0.89	0.324	1.27e-54	3	ENSG00000125818	PSMF1	lens fibre
695	3.14e-50	0.977701	0.86	0.298	1.05e-45	3	ENSG00000134853	PDGFRA	lens fibre
696	1.04e-94	0.95687	0.756	0.116	3.5e-90	3	ENSG00000187193	MT1X	lens fibre
697	2.71e-198	0.950858	0.701	0.022	9.1e-194	3	ENSG00000167588	GPD1	lens fibre
698	6.89e-88	0.94902	0.634	0.085	2.31e-83	3	ENSG00000197565	COL4A6	lens fibre
699	2.61e-55	0.948765	0.951	0.44	8.76e-51	3	ENSG00000091527	CDV3	lens fibre
700	1.08e-113	0.947097	0.762	0.098	3.64e-109	3	ENSG00000116353	MECR	lens fibre
701	1.61e-61	0.941096	0.896	0.279	5.39e-57	3	ENSG00000092969	TGFB2	lens fibre
702	2.19e-215	0.939041	0.701	0.014	7.34e-211	3	ENSG00000232560	LINC01549	lens fibre
703	1.86e-28	0.932721	0.994	0.756	6.24e-24	3	ENSG00000074800	ENO1	lens fibre
704	5.12e-54	0.932424	0.988	0.834	1.72e-49	3	ENSG00000240972	MIF	lens fibre
705	2.44e-61	0.92928	0.933	0.347	8.19e-57	3	ENSG00000224877	NDUFAF8	lens fibre
706	4.39e-114	0.924965	0.707	0.076	1.47e-109	3	ENSG00000126218	F10	lens fibre
707	5.03e-32	0.922456	0.89	0.504	1.69e-27	3	ENSG00000134871	COL4A2	lens fibre
708	9.14e-171	0.919704	0.756	0.044	3.07e-166	3	ENSG00000106733	NMRK1	lens fibre
709	8.67e-83	0.911211	0.713	0.125	2.91e-78	3	ENSG00000140263	SORD	lens fibre
710	9.41e-57	0.904261	0.921	0.365	3.16e-52	3	ENSG00000178449	COX14	lens fibre
711	1.98e-75	0.886877	0.591	0.084	6.65e-71	3	ENSG00000170801	HTRA3	lens fibre
712	4.53e-223	0.882481	0.652	0.006	1.52e-218	3	ENSG00000267628	AC104423.1	lens fibre
713	2.39e-68	0.882339	0.793	0.188	8.02e-64	3	ENSG00000086062	B4GALT1	lens fibre
714	1.11e-103	0.872302	0.732	0.092	3.71e-99	3	ENSG00000071282	LMCD1	lens fibre
715	1.75e-117	0.870905	0.744	0.086	5.86e-113	3	ENSG00000139438	FAM222A	lens fibre
716	9.78e-41	0.86646	0.732	0.242	3.28e-36	3	ENSG00000188153	COL4A5	lens fibre
717	6.82e-81	0.863806	0.854	0.175	2.29e-76	3	ENSG00000118985	ELL2	lens fibre
718	1.37e-58	0.862746	0.756	0.197	4.59e-54	3	ENSG00000185565	LSAMP	lens fibre
719	5.51e-112	0.859211	0.72	0.084	1.85e-107	3	ENSG00000187123	LYPD6	lens fibre
720	2.28e-35	0.852999	0.994	0.67	7.65e-31	3	ENSG00000272398	CD24	lens fibre
721	3.73e-23	0.84159	0.902	0.555	1.25e-18	3	ENSG00000168209	DDIT4	lens fibre
722	1.83e-54	0.837688	0.902	0.287	6.15e-50	3	ENSG00000083067	TRPM3	lens fibre
723	1.21e-27	0.832575	0.817	0.399	4.05e-23	3	ENSG00000124006	OBSL1	lens fibre
724	1.56e-60	0.823081	0.793	0.207	5.22e-56	3	ENSG00000088367	EPB41L1	lens fibre
725	1.44e-44	0.81953	0.896	0.367	4.82e-40	3	ENSG00000079819	EPB41L2	lens fibre
726	3.93e-19	0.812486	0.994	0.931	1.32e-14	3	ENSG00000087086	FTL	lens fibre
727	1.29e-57	0.805643	0.848	0.255	4.32e-53	3	ENSG00000153310	FAM49B	lens fibre
728	1.01e-39	0.804365	0.915	0.452	3.39e-35	3	ENSG00000138495	COX17	lens fibre
729	2e-187	0.803941	0.683	0.022	6.72e-183	3	ENSG00000248329	APELA	lens fibre
730	1.31e-36	0.802705	0.756	0.279	4.41e-32	3	ENSG00000132002	DNAJB1	lens fibre
731	1.11e-108	0.791615	0.665	0.07	3.73e-104	3	ENSG00000167306	MYO5B	lens fibre
732	1.78e-53	0.785507	0.841	0.257	5.96e-49	3	ENSG00000060982	BCAT1	lens fibre
733	2.54e-120	0.783233	0.732	0.076	8.51e-116	3	ENSG00000177459	ERICH5	lens fibre
734	1.19e-187	0.775857	0.726	0.028	3.99e-183	3	ENSG00000182968	SOX1	lens fibre
735	2.46e-50	0.772626	0.585	0.132	8.26e-46	3	ENSG00000113739	STC2	lens fibre
736	4.74e-128	0.771585	0.677	0.054	1.59e-123	3	ENSG00000021355	SERPINB1	lens fibre
737	4.56e-101	0.768441	0.75	0.104	1.53e-96	3	ENSG00000107438	PDLIM1	lens fibre
738	1.28e-89	0.766552	0.726	0.111	4.3e-85	3	ENSG00000129595	EPB41L4A	lens fibre
739	1.72e-41	0.762186	0.866	0.345	5.78e-37	3	ENSG00000143153	ATP1B1	lens fibre
740	3.12e-58	0.760025	1	0.956	1.05e-53	3	ENSG00000111640	GAPDH	lens fibre
741	3.23e-56	0.75891	0.799	0.216	1.08e-51	3	ENSG00000120549	KIAA1217	lens fibre
742	3.13e-27	0.757518	0.927	0.648	1.05e-22	3	ENSG00000105223	PLD3	lens fibre
743	1.29e-38	0.754016	0.97	0.55	4.31e-34	3	ENSG00000168268	NT5DC2	lens fibre
744	1.98e-23	0.746538	0.902	0.576	6.63e-19	3	ENSG00000084234	APLP2	lens fibre
745	5.64e-150	0.745003	0.598	0.025	1.89e-145	3	ENSG00000107859	PITX3	lens fibre
746	3.24e-80	0.744075	0.726	0.126	1.09e-75	3	ENSG00000077585	GPR137B	lens fibre
747	2.92e-49	0.742001	0.774	0.231	9.78e-45	3	ENSG00000091986	CCDC80	lens fibre
748	1.28e-36	0.740825	0.884	0.442	4.3e-32	3	ENSG00000138175	ARL3	lens fibre
749	2.5e-42	0.735754	0.726	0.229	8.37e-38	3	ENSG00000134323	MYCN	lens fibre
750	1.84e-45	0.731718	0.78	0.234	6.18e-41	3	ENSG00000125266	EFNB2	lens fibre
751	4.39e-65	0.724175	0.787	0.194	1.47e-60	3	ENSG00000060656	PTPRU	lens fibre
752	5.39e-39	0.717288	0.988	0.676	1.81e-34	3	ENSG00000054148	PHPT1	lens fibre
753	2.2e-65	0.71015	0.677	0.129	7.37e-61	3	ENSG00000120256	LRP11	lens fibre
754	8.25e-38	0.705495	0.994	0.835	2.77e-33	3	ENSG00000140319	SRP14	lens fibre
755	1.97e-35	0.703355	0.976	0.662	6.62e-31	3	ENSG00000117592	PRDX6	lens fibre
756	5.53e-54	0.701152	0.848	0.25	1.86e-49	3	ENSG00000153904	DDAH1	lens fibre
757	9.69e-43	0.70104	0.872	0.365	3.25e-38	3	ENSG00000100075	SLC25A1	lens fibre
758	3.22e-38	0.697939	0.884	0.446	1.08e-33	3	ENSG00000153048	CARHSP1	lens fibre
759	3.13e-109	0.697812	0.537	0.036	1.05e-104	3	ENSG00000154175	ABI3BP	lens fibre
760	2.9e-155	0.689845	0.537	0.013	9.73e-151	3	ENSG00000132840	BHMT2	lens fibre
761	2.1e-111	0.688411	0.628	0.055	7.03e-107	3	ENSG00000101197	BIRC7	lens fibre
762	4.07e-37	0.687901	0.695	0.226	1.37e-32	3	ENSG00000101680	LAMA1	lens fibre
763	2.18e-112	0.685403	0.604	0.047	7.32e-108	3	ENSG00000152076	CCDC74B	lens fibre
764	2.41e-116	0.682972	0.567	0.036	8.08e-112	3	ENSG00000188064	WNT7B	lens fibre
765	4.43e-113	0.68107	0.585	0.044	1.49e-108	3	ENSG00000170542	SERPINB9	lens fibre
766	1.26e-49	0.679452	0.854	0.278	4.24e-45	3	ENSG00000115350	POLE4	lens fibre
767	5.89e-76	0.677785	0.762	0.136	1.98e-71	3	ENSG00000154330	PGM5	lens fibre
768	2.45e-141	0.676948	0.61	0.031	8.23e-137	3	ENSG00000065833	ME1	lens fibre
769	2.91e-126	0.671019	0.591	0.037	9.78e-122	3	ENSG00000150556	LYPD6B	lens fibre
770	3.17e-36	0.666369	0.982	0.662	1.06e-31	3	ENSG00000266402	SNHG25	lens fibre
771	7.59e-36	0.656782	0.902	0.406	2.54e-31	3	ENSG00000085662	AKR1B1	lens fibre
772	5.19e-103	0.654565	0.628	0.061	1.74e-98	3	ENSG00000104267	CA2	lens fibre
773	6.98e-63	0.653472	0.835	0.216	2.34e-58	3	ENSG00000168273	SMIM4	lens fibre
774	2.3e-68	0.651933	0.713	0.14	7.72e-64	3	ENSG00000253982	AC100810.1	lens fibre
775	3.46e-36	0.648311	0.829	0.326	1.16e-31	3	ENSG00000099204	ABLIM1	lens fibre
776	1.97e-65	0.646722	0.738	0.161	6.6e-61	3	ENSG00000143499	SMYD2	lens fibre
777	1.29e-39	0.637364	0.976	0.526	4.33e-35	3	ENSG00000197956	S100A6	lens fibre
778	1.44e-49	0.636228	0.75	0.191	4.83e-45	3	ENSG00000236782	AL391650.1	lens fibre
779	4.59e-40	0.634113	0.884	0.367	1.54e-35	3	ENSG00000166228	PCBD1	lens fibre
780	1.22e-82	0.633181	0.488	0.044	4.08e-78	3	ENSG00000142910	TINAGL1	lens fibre
781	1.08e-81	0.63032	0.64	0.092	3.63e-77	3	ENSG00000260025	AC009414.2	lens fibre
782	3.78e-66	0.629164	0.659	0.119	1.27e-61	3	ENSG00000115415	STAT1	lens fibre
783	4.15e-62	0.627905	0.646	0.124	1.39e-57	3	ENSG00000105738	SIPA1L3	lens fibre
784	2.9e-165	0.627684	0.598	0.018	9.74e-161	3	ENSG00000182759	MAFA	lens fibre
785	4.47e-50	0.627415	0.665	0.164	1.5e-45	3	ENSG00000068615	REEP1	lens fibre
786	1.64e-57	0.627089	0.713	0.162	5.5e-53	3	ENSG00000176485	PLA2G16	lens fibre
787	1.38e-157	0.626376	0.579	0.018	4.63e-153	3	ENSG00000166682	TMPRSS5	lens fibre
788	1.69e-60	0.625406	0.64	0.124	5.68e-56	3	ENSG00000145391	SETD7	lens fibre
789	1.8e-58	0.624322	0.677	0.151	6.03e-54	3	ENSG00000116212	LRRC42	lens fibre
790	8.07e-51	0.619473	0.854	0.241	2.71e-46	3	ENSG00000075340	ADD2	lens fibre
791	2.58e-40	0.619082	0.854	0.367	8.65e-36	3	ENSG00000255198	SNHG9	lens fibre
792	5.56e-45	0.615897	0.841	0.301	1.87e-40	3	ENSG00000103260	METRN	lens fibre
793	1.6e-34	0.614182	0.512	0.137	5.38e-30	3	ENSG00000198756	COLGALT2	lens fibre
794	3.41e-129	0.61104	0.561	0.028	1.14e-124	3	ENSG00000002587	HS3ST1	lens fibre
795	2.3e-27	0.60645	0.97	0.7	7.71e-23	3	ENSG00000116288	PARK7	lens fibre
796	3.87e-28	0.604498	0.994	0.765	1.3e-23	3	ENSG00000127540	UQCR11	lens fibre
797	2.81e-16	0.597628	0.646	0.31	9.41e-12	3	ENSG00000116133	DHCR24	lens fibre
798	8.32e-59	0.596942	0.64	0.117	2.79e-54	3	ENSG00000135046	ANXA1	lens fibre
799	2.46e-54	0.592759	0.665	0.148	8.26e-50	3	ENSG00000112186	CAP2	lens fibre
800	4.38e-40	0.591862	0.854	0.349	1.47e-35	3	ENSG00000149187	CELF1	lens fibre
801	1.03e-92	0.591609	0.604	0.068	3.45e-88	3	ENSG00000134548	SPX	lens fibre
802	1.03e-45	0.586673	0.841	0.289	3.44e-41	3	ENSG00000163170	BOLA3	lens fibre
803	5.56e-30	0.585551	0.957	0.582	1.87e-25	3	ENSG00000150779	TIMM8B	lens fibre
804	1.85e-31	0.583829	0.915	0.483	6.21e-27	3	ENSG00000105254	TBCB	lens fibre
805	8.48e-78	0.583096	0.622	0.088	2.84e-73	3	ENSG00000161714	PLCD3	lens fibre
806	1.51e-68	0.574863	0.652	0.111	5.05e-64	3	ENSG00000146733	PSPH	lens fibre
807	2.79e-27	0.574369	0.89	0.435	9.36e-23	3	ENSG00000105701	FKBP8	lens fibre
808	7.26e-156	0.570822	0.457	0.004	2.43e-151	3	ENSG00000154764	WNT7A	lens fibre
809	1.01e-24	0.566959	0.921	0.482	3.38e-20	3	ENSG00000197694	SPTAN1	lens fibre
810	1.58e-41	0.557221	0.677	0.191	5.31e-37	3	ENSG00000110429	FBXO3	lens fibre
811	8.33e-30	0.553395	0.823	0.338	2.79e-25	3	ENSG00000214026	MRPL23	lens fibre
812	6.3e-52	0.551512	0.689	0.165	2.11e-47	3	ENSG00000093072	ADA2	lens fibre
813	1.91e-25	0.547436	0.915	0.563	6.41e-21	3	ENSG00000185088	RPS27L	lens fibre
814	2.65e-23	0.545844	0.933	0.662	8.9e-19	3	ENSG00000204387	C6orf48	lens fibre
815	1.33e-64	0.542758	0.646	0.117	4.47e-60	3	ENSG00000141198	TOM1L1	lens fibre
816	3.01e-52	0.542312	0.628	0.137	1.01e-47	3	ENSG00000257093	KIAA1147	lens fibre
817	6.9e-54	0.539624	0.61	0.122	2.31e-49	3	ENSG00000007237	GAS7	lens fibre
818	8.22e-32	0.537616	0.738	0.284	2.76e-27	3	ENSG00000093010	COMT	lens fibre
819	1.84e-34	0.536916	0.689	0.225	6.18e-30	3	ENSG00000137463	MGARP	lens fibre
820	6.48e-60	0.534631	0.616	0.116	2.17e-55	3	ENSG00000107789	MINPP1	lens fibre
821	3.45e-41	0.532456	0.738	0.22	1.16e-36	3	ENSG00000174574	AKIRIN1	lens fibre
822	1.81e-25	0.517472	0.921	0.451	6.06e-21	3	ENSG00000128245	YWHAH	lens fibre
823	3.13e-81	0.517191	0.652	0.093	1.05e-76	3	ENSG00000106305	AIMP2	lens fibre
824	1.01e-21	0.507717	0.994	0.821	3.4e-17	3	ENSG00000065978	YBX1	lens fibre
825	1.05e-25	0.506939	0.866	0.467	3.54e-21	3	ENSG00000171222	SCAND1	lens fibre
826	1.35e-34	0.505517	0.677	0.215	4.51e-30	3	ENSG00000102753	KPNA3	lens fibre
827	4.34e-59	0.503379	0.713	0.151	1.45e-54	3	ENSG00000235169	SMIM1	lens fibre
828	3.1e-69	0.502638	0.622	0.095	1.04e-64	3	ENSG00000140807	NKD1	lens fibre
829	6.92e-32	0.502019	0.848	0.371	2.32e-27	3	ENSG00000179262	RAD23A	lens fibre
830	3.57e-33	0.500195	0.75	0.296	1.2e-28	3	ENSG00000174080	CTSF	lens fibre
831	1.74e-30	0.500046	0.86	0.378	5.84e-26	3	ENSG00000160691	SHC1	lens fibre
832	1.07e-68	2.95698	0.919	0.321	3.59e-64	4	ENSG00000080166	DCT	ciliary margin zone
833	2.98e-50	2.51694	0.933	0.441	1e-45	4	ENSG00000185664	PMEL	ciliary margin zone
834	1.22e-77	2.30481	0.711	0.129	4.09e-73	4	ENSG00000134245	WNT2B	ciliary margin zone
835	7.15e-120	2.26978	0.748	0.077	2.4e-115	4	ENSG00000105825	TFPI2	ciliary margin zone
836	3.39e-55	1.99663	0.97	0.535	1.14e-50	4	ENSG00000152661	GJA1	ciliary margin zone
837	5.85e-41	1.92595	0.97	0.588	1.96e-36	4	ENSG00000145423	SFRP2	ciliary margin zone
838	4.45e-59	1.80908	0.904	0.297	1.49e-54	4	ENSG00000083067	TRPM3	ciliary margin zone
839	3.56e-53	1.74106	0.963	0.456	1.19e-48	4	ENSG00000163331	DAPL1	ciliary margin zone
840	1.01e-44	1.73463	0.793	0.295	3.37e-40	4	ENSG00000127920	GNG11	ciliary margin zone
841	4.25e-29	1.65493	0.948	0.754	1.42e-24	4	ENSG00000136156	ITM2B	ciliary margin zone
842	8.56e-67	1.65152	0.889	0.259	2.87e-62	4	ENSG00000160111	CPAMD8	ciliary margin zone
843	1.35e-111	1.64218	0.659	0.06	4.51e-107	4	ENSG00000143882	ATP6V1C2	ciliary margin zone
844	1.72e-92	1.63442	0.659	0.077	5.78e-88	4	ENSG00000169507	SLC38A11	ciliary margin zone
845	1.63e-63	1.63256	0.844	0.244	5.48e-59	4	ENSG00000189056	RELN	ciliary margin zone
846	5.52e-95	1.62528	0.726	0.097	1.85e-90	4	ENSG00000077498	TYR	ciliary margin zone
847	4.26e-33	1.56869	0.807	0.415	1.43e-28	4	ENSG00000104763	ASAH1	ciliary margin zone
848	5.36e-71	1.52769	0.748	0.144	1.8e-66	4	ENSG00000107165	TYRP1	ciliary margin zone
849	2.98e-73	1.52118	0.719	0.137	9.99e-69	4	ENSG00000103257	SLC7A5	ciliary margin zone
850	1.86e-33	1.48045	0.83	0.398	6.22e-29	4	ENSG00000132386	SERPINF1	ciliary margin zone
851	2.34e-40	1.41023	0.993	0.659	7.86e-36	4	ENSG00000117318	ID3	ciliary margin zone
852	1.52e-79	1.34357	0.748	0.126	5.09e-75	4	ENSG00000049089	COL9A2	ciliary margin zone
853	3.04e-51	1.21467	0.904	0.343	1.02e-46	4	ENSG00000175745	NR2F1	ciliary margin zone
854	2.52e-40	1.18927	0.985	0.79	8.45e-36	4	ENSG00000084207	GSTP1	ciliary margin zone
855	9.07e-58	1.17832	0.733	0.181	3.04e-53	4	ENSG00000086696	HSD17B2	ciliary margin zone
856	1.96e-124	1.14502	0.696	0.056	6.56e-120	4	ENSG00000123892	RAB38	ciliary margin zone
857	1.16e-30	1.14389	0.837	0.456	3.89e-26	4	ENSG00000168003	SLC3A2	ciliary margin zone
858	5.98e-70	1.1421	0.726	0.124	2.01e-65	4	ENSG00000134160	TRPM1	ciliary margin zone
859	9.01e-51	1.13507	0.793	0.226	3.02e-46	4	ENSG00000112280	COL9A1	ciliary margin zone
860	9.72e-86	1.13219	0.526	0.047	3.26e-81	4	ENSG00000103175	WFDC1	ciliary margin zone
861	2.06e-141	1.12526	0.593	0.025	6.91e-137	4	ENSG00000166558	SLC38A8	ciliary margin zone
862	8.76e-80	1.09212	0.844	0.172	2.94e-75	4	ENSG00000103154	NECAB2	ciliary margin zone
863	1.75e-68	1.08334	0.696	0.118	5.86e-64	4	ENSG00000162344	FGF19	ciliary margin zone
864	1.28e-43	1.07917	0.993	0.473	4.28e-39	4	ENSG00000007372	PAX6	ciliary margin zone
865	6.62e-50	1.06158	0.704	0.167	2.22e-45	4	ENSG00000165588	OTX2	ciliary margin zone
866	4.24e-36	1.05069	0.711	0.227	1.42e-31	4	ENSG00000184254	ALDH1A3	ciliary margin zone
867	5.76e-58	1.0227	0.741	0.178	1.93e-53	4	ENSG00000103064	SLC7A6	ciliary margin zone
868	5.06e-70	1.01204	0.778	0.15	1.7e-65	4	ENSG00000119614	VSX2	ciliary margin zone
869	2.22e-39	1.01196	0.867	0.318	7.44e-35	4	ENSG00000134438	RAX	ciliary margin zone
870	4.28e-65	0.974194	0.837	0.189	1.43e-60	4	ENSG00000106689	LHX2	ciliary margin zone
871	6.84e-55	0.972515	0.637	0.129	2.29e-50	4	ENSG00000239922	AC092958.1	ciliary margin zone
872	1.74e-42	0.9662	0.83	0.291	5.84e-38	4	ENSG00000215612	HMX1	ciliary margin zone
873	1.17e-25	0.965786	0.711	0.265	3.91e-21	4	ENSG00000165092	ALDH1A1	ciliary margin zone
874	9.64e-49	0.950923	0.63	0.128	3.23e-44	4	ENSG00000188505	NCCRP1	ciliary margin zone
875	1.04e-69	0.930751	0.652	0.1	3.49e-65	4	ENSG00000081479	LRP2	ciliary margin zone
876	7.34e-52	0.928695	0.652	0.138	2.46e-47	4	ENSG00000121039	RDH10	ciliary margin zone
877	3.06e-35	0.918696	1	0.863	1.03e-30	4	ENSG00000110492	MDK	ciliary margin zone
878	1.83e-71	0.917213	0.607	0.083	6.14e-67	4	ENSG00000118515	SGK1	ciliary margin zone
879	4.81e-26	0.915227	0.652	0.249	1.61e-21	4	ENSG00000162496	DHRS3	ciliary margin zone
880	1.24e-28	0.90622	0.874	0.462	4.16e-24	4	ENSG00000119655	NPC2	ciliary margin zone
881	1.25e-60	0.901266	0.319	0.021	4.2e-56	4	ENSG00000104327	CALB1	ciliary margin zone
882	6.05e-30	0.895249	0.815	0.363	2.03e-25	4	ENSG00000182871	COL18A1	ciliary margin zone
883	1.44e-36	0.887106	0.881	0.347	4.84e-32	4	ENSG00000180660	MAB21L1	ciliary margin zone
884	2.07e-37	0.876266	0.756	0.25	6.93e-33	4	ENSG00000092068	SLC7A8	ciliary margin zone
885	8.4e-31	0.870357	0.726	0.268	2.82e-26	4	ENSG00000064309	CDON	ciliary margin zone
886	3.92e-74	0.866419	0.615	0.085	1.32e-69	4	ENSG00000163347	CLDN1	ciliary margin zone
887	7e-48	0.8642	0.585	0.121	2.35e-43	4	ENSG00000136235	GPNMB	ciliary margin zone
888	1.74e-29	0.862121	0.963	0.592	5.84e-25	4	ENSG00000152518	ZFP36L2	ciliary margin zone
889	2.37e-46	0.855747	0.748	0.216	7.95e-42	4	ENSG00000111885	MAN1A1	ciliary margin zone
890	1.37e-36	0.834145	0.926	0.428	4.59e-32	4	ENSG00000105655	ISYNA1	ciliary margin zone
891	1.22e-19	0.828782	1	0.96	4.09e-15	4	ENSG00000167996	FTH1	ciliary margin zone
892	4.21e-32	0.823942	0.793	0.296	1.41e-27	4	ENSG00000125968	ID1	ciliary margin zone
893	6.69e-40	0.823866	0.748	0.228	2.24e-35	4	ENSG00000043355	ZIC2	ciliary margin zone
894	1.04e-46	0.822122	0.756	0.213	3.49e-42	4	ENSG00000135069	PSAT1	ciliary margin zone
895	9.83e-37	0.815778	0.63	0.168	3.3e-32	4	ENSG00000003989	SLC7A2	ciliary margin zone
896	3.31e-92	0.799073	0.496	0.034	1.11e-87	4	ENSG00000150551	LYPD1	ciliary margin zone
897	9.69e-18	0.792782	0.763	0.401	3.25e-13	4	ENSG00000049540	ELN	ciliary margin zone
898	1.18e-43	0.789746	0.563	0.117	3.97e-39	4	ENSG00000124920	MYRF	ciliary margin zone
899	8.19e-95	0.777505	0.563	0.047	2.75e-90	4	ENSG00000115507	OTX1	ciliary margin zone
900	1.98e-43	0.777278	0.6	0.146	6.64e-39	4	ENSG00000122644	ARL4A	ciliary margin zone
901	1.14e-88	0.770648	0.452	0.028	3.81e-84	4	ENSG00000254226	LINC01933	ciliary margin zone
902	4.29e-86	0.763522	0.519	0.042	1.44e-81	4	ENSG00000120215	MLANA	ciliary margin zone
903	2.19e-36	0.757407	0.859	0.335	7.36e-32	4	ENSG00000149948	HMGA2	ciliary margin zone
904	1.08e-107	0.754654	0.407	0.012	3.63e-103	4	ENSG00000188770	OPTC	ciliary margin zone
905	6.69e-28	0.748263	0.756	0.282	2.24e-23	4	ENSG00000109911	ELP4	ciliary margin zone
906	3.21e-57	0.738471	0.407	0.044	1.08e-52	4	ENSG00000187094	CCK	ciliary margin zone
907	1.52e-48	0.736688	0.563	0.109	5.08e-44	4	ENSG00000103811	CTSH	ciliary margin zone
908	7.85e-35	0.725004	0.741	0.24	2.63e-30	4	ENSG00000175928	LRRN1	ciliary margin zone
909	5.03e-25	0.724027	0.711	0.287	1.69e-20	4	ENSG00000183036	PCP4	ciliary margin zone
910	1.24e-34	0.716979	0.615	0.173	4.16e-30	4	ENSG00000145632	PLK2	ciliary margin zone
911	1.42e-37	0.709023	0.719	0.214	4.77e-33	4	ENSG00000158270	COLEC12	ciliary margin zone
912	6.13e-96	0.708411	0.489	0.03	2.06e-91	4	ENSG00000182747	SLC35D3	ciliary margin zone
913	1.83e-26	0.704568	0.993	0.742	6.13e-22	4	ENSG00000164032	H2AFZ	ciliary margin zone
914	1.25e-22	0.703603	0.978	0.654	4.18e-18	4	ENSG00000117394	SLC2A1	ciliary margin zone
915	1e-37	0.702647	0.77	0.233	3.36e-33	4	ENSG00000143995	MEIS1	ciliary margin zone
916	3.4e-28	0.700331	0.97	0.579	1.14e-23	4	ENSG00000164104	HMGB2	ciliary margin zone
917	2.71e-51	0.682081	0.63	0.118	9.08e-47	4	ENSG00000152977	ZIC1	ciliary margin zone
918	1.21e-44	0.681749	0.667	0.164	4.04e-40	4	ENSG00000137880	GCHFR	ciliary margin zone
919	9.5e-50	0.679412	0.489	0.076	3.19e-45	4	ENSG00000157873	TNFRSF14	ciliary margin zone
920	6.48e-22	0.676675	0.911	0.523	2.17e-17	4	ENSG00000006042	TMEM98	ciliary margin zone
921	2.26e-26	0.671781	0.97	0.627	7.57e-22	4	ENSG00000118418	HMGN3	ciliary margin zone
922	1.79e-31	0.669551	0.763	0.26	6.01e-27	4	ENSG00000184302	SIX6	ciliary margin zone
923	8.09e-72	0.66783	0.533	0.059	2.71e-67	4	ENSG00000205403	CFI	ciliary margin zone
924	3.26e-27	0.663211	0.793	0.313	1.09e-22	4	ENSG00000135097	MSI1	ciliary margin zone
925	1.59e-33	0.651284	0.726	0.227	5.33e-29	4	ENSG00000113361	CDH6	ciliary margin zone
926	2.3e-53	0.649693	0.467	0.064	7.72e-49	4	ENSG00000198108	CHSY3	ciliary margin zone
927	3.71e-30	0.647515	0.896	0.379	1.24e-25	4	ENSG00000175063	UBE2C	ciliary margin zone
928	1.86e-40	0.644451	0.548	0.124	6.23e-36	4	ENSG00000165752	STK32C	ciliary margin zone
929	6.53e-22	0.63832	0.704	0.329	2.19e-17	4	ENSG00000163527	STT3B	ciliary margin zone
930	4.95e-36	0.623666	0.652	0.183	1.66e-31	4	ENSG00000130208	APOC1	ciliary margin zone
931	3.66e-45	0.62312	0.652	0.152	1.23e-40	4	ENSG00000141447	OSBPL1A	ciliary margin zone
932	5.23e-28	0.618498	0.926	0.468	1.75e-23	4	ENSG00000128951	DUT	ciliary margin zone
933	4.65e-21	0.618014	0.844	0.401	1.56e-16	4	ENSG00000139219	COL2A1	ciliary margin zone
934	3.18e-36	0.612191	0.607	0.165	1.07e-31	4	ENSG00000166340	TPP1	ciliary margin zone
935	6.22e-37	0.610556	0.578	0.141	2.09e-32	4	ENSG00000154856	APCDD1	ciliary margin zone
936	3.43e-23	0.609492	0.97	0.639	1.15e-18	4	ENSG00000169714	CNBP	ciliary margin zone
937	1e-21	0.606943	0.689	0.294	3.37e-17	4	ENSG00000184349	EFNA5	ciliary margin zone
938	1.46e-29	0.600682	0.859	0.351	4.91e-25	4	ENSG00000164611	PTTG1	ciliary margin zone
939	5.58e-48	0.599284	0.504	0.084	1.87e-43	4	ENSG00000139800	ZIC5	ciliary margin zone
940	2.21e-38	0.598996	0.63	0.16	7.4e-34	4	ENSG00000267280	TBX2-AS1	ciliary margin zone
941	2.75e-25	0.598442	0.948	0.527	9.23e-21	4	ENSG00000132780	NASP	ciliary margin zone
942	6.45e-32	0.592597	0.719	0.234	2.16e-27	4	ENSG00000109881	CCDC34	ciliary margin zone
943	4.59e-25	0.589753	0.859	0.371	1.54e-20	4	ENSG00000205213	LGR4	ciliary margin zone
944	3.15e-16	0.587781	0.926	0.547	1.06e-11	4	ENSG00000181350	LRRC75A	ciliary margin zone
945	1.31e-82	0.587722	0.533	0.052	4.39e-78	4	ENSG00000224958	PGM5-AS1	ciliary margin zone
946	5.55e-56	0.584995	0.467	0.06	1.86e-51	4	ENSG00000182612	TSPAN10	ciliary margin zone
947	1.94e-25	0.584099	0.741	0.3	6.5e-21	4	ENSG00000057019	DCBLD2	ciliary margin zone
948	1.25e-23	0.583956	0.807	0.387	4.18e-19	4	ENSG00000146540	C7orf50	ciliary margin zone
949	5.72e-87	0.581639	0.444	0.027	1.92e-82	4	ENSG00000164175	SLC45A2	ciliary margin zone
950	2.4e-56	0.580658	0.504	0.068	8.06e-52	4	ENSG00000101850	GPR143	ciliary margin zone
951	6.48e-36	0.577916	0.607	0.16	2.17e-31	4	ENSG00000154330	PGM5	ciliary margin zone
952	1.79e-13	0.576506	0.57	0.258	5.99e-09	4	ENSG00000163251	FZD5	ciliary margin zone
953	3.16e-38	0.573146	0.652	0.178	1.06e-33	4	ENSG00000103942	HOMER2	ciliary margin zone
954	4.54e-94	0.569463	0.452	0.024	1.52e-89	4	ENSG00000241158	ADAMTS9-AS1	ciliary margin zone
955	1.89e-16	0.568987	0.689	0.328	6.35e-12	4	ENSG00000173848	NET1	ciliary margin zone
956	1.45e-34	0.567405	0.63	0.175	4.86e-30	4	ENSG00000101144	BMP7	ciliary margin zone
957	1.48e-19	0.563541	0.911	0.61	4.96e-15	4	ENSG00000172270	BSG	ciliary margin zone
958	3.81e-75	0.562317	0.467	0.04	1.28e-70	4	ENSG00000143355	LHX9	ciliary margin zone
959	4.03e-37	0.558232	0.504	0.108	1.35e-32	4	ENSG00000168672	FAM84B	ciliary margin zone
960	4.52e-42	0.555418	0.43	0.066	1.52e-37	4	ENSG00000107317	PTGDS	ciliary margin zone
961	1.69e-21	0.55495	0.793	0.353	5.66e-17	4	ENSG00000113810	SMC4	ciliary margin zone
962	2.26e-22	0.554534	0.844	0.421	7.59e-18	4	ENSG00000148950	IMMP1L	ciliary margin zone
963	1.72e-21	0.553892	0.711	0.294	5.77e-17	4	ENSG00000164050	PLXNB1	ciliary margin zone
964	6.47e-20	0.551557	0.667	0.294	2.17e-15	4	ENSG00000159842	ABR	ciliary margin zone
965	1.55e-21	0.551428	1	0.76	5.21e-17	4	ENSG00000167468	GPX4	ciliary margin zone
966	2.76e-22	0.549882	0.97	0.608	9.25e-18	4	ENSG00000115541	HSPE1	ciliary margin zone
967	1.31e-20	0.546978	0.904	0.517	4.41e-16	4	ENSG00000137309	HMGA1	ciliary margin zone
968	1.19e-26	0.545745	0.874	0.39	4e-22	4	ENSG00000176890	TYMS	ciliary margin zone
969	4.38e-19	0.543991	0.681	0.283	1.47e-14	4	ENSG00000121068	TBX2	ciliary margin zone
970	2.46e-82	0.543673	0.452	0.031	8.25e-78	4	ENSG00000163630	SYNPR	ciliary margin zone
971	2.02e-22	0.539295	0.963	0.573	6.77e-18	4	ENSG00000115758	ODC1	ciliary margin zone
972	2.29e-30	0.538045	0.548	0.158	7.67e-26	4	ENSG00000164638	SLC29A4	ciliary margin zone
973	4.66e-45	0.533911	0.578	0.112	1.56e-40	4	ENSG00000170421	KRT8	ciliary margin zone
974	2.35e-24	0.532857	0.933	0.484	7.89e-20	4	ENSG00000180817	PPA1	ciliary margin zone
975	9.47e-60	0.531327	0.511	0.069	3.18e-55	4	ENSG00000170382	LRRN2	ciliary margin zone
976	1.24e-24	0.530987	0.763	0.31	4.16e-20	4	ENSG00000000003	TSPAN6	ciliary margin zone
977	4.79e-41	0.52964	0.533	0.112	1.61e-36	4	ENSG00000095713	CRTAC1	ciliary margin zone
978	3.29e-23	0.523868	0.896	0.44	1.1e-18	4	ENSG00000136527	TRA2B	ciliary margin zone
979	2.39e-39	0.523599	0.526	0.111	8.01e-35	4	ENSG00000146072	TNFRSF21	ciliary margin zone
980	3.15e-20	0.521191	0.874	0.474	1.06e-15	4	ENSG00000131747	TOP2A	ciliary margin zone
981	9.51e-24	0.519973	0.748	0.3	3.19e-19	4	ENSG00000100918	REC8	ciliary margin zone
982	7.77e-67	0.516996	0.4	0.031	2.6e-62	4	ENSG00000167618	LAIR2	ciliary margin zone
983	1.8e-54	0.516554	0.43	0.05	6.04e-50	4	ENSG00000226742	HSBP1L1	ciliary margin zone
984	1.2e-39	0.514445	0.659	0.167	4.02e-35	4	ENSG00000148204	CRB2	ciliary margin zone
985	1.2e-25	0.514371	0.837	0.351	4.01e-21	4	ENSG00000173207	CKS1B	ciliary margin zone
986	1.08e-18	0.514014	1	0.816	3.64e-14	4	ENSG00000198830	HMGN2	ciliary margin zone
987	1.62e-19	0.511959	0.556	0.208	5.42e-15	4	ENSG00000130203	APOE	ciliary margin zone
988	2.41e-21	0.510832	0.815	0.36	8.08e-17	4	ENSG00000170558	CDH2	ciliary margin zone
989	1.34e-25	0.508289	0.467	0.131	4.48e-21	4	ENSG00000111052	LIN7A	ciliary margin zone
990	7.53e-18	0.507162	0.674	0.313	2.52e-13	4	ENSG00000138448	ITGAV	ciliary margin zone
991	2.19e-23	0.505886	0.97	0.551	7.35e-19	4	ENSG00000099901	RANBP1	ciliary margin zone
992	5.21e-29	0.50379	0.681	0.213	1.75e-24	4	ENSG00000117724	CENPF	ciliary margin zone
993	8.1e-23	0.500359	0.593	0.21	2.72e-18	4	ENSG00000185909	KLHDC8B	ciliary margin zone
994	4.61e-121	2.89757	0.992	0.216	1.55e-116	5	ENSG00000139970	RTN1	RGCs
995	1.76e-108	2.84762	1	0.273	5.9e-104	5	ENSG00000168824	NSG1	RGCs
996	2.2e-109	2.81537	1	0.251	7.37e-105	5	ENSG00000184144	CNTN2	RGCs
997	6.09e-80	2.76852	1	0.682	2.04e-75	5	ENSG00000137285	TUBB2B	RGCs
998	5.44e-113	2.70788	1	0.238	1.82e-108	5	ENSG00000135406	PRPH	RGCs
999	2.07e-111	2.70785	1	0.254	6.95e-107	5	ENSG00000148798	INA	RGCs
1000	7.95e-94	2.69381	1	0.369	2.66e-89	5	ENSG00000072832	CRMP1	RGCs
1001	5.51e-86	2.66343	1	0.404	1.85e-81	5	ENSG00000104435	STMN2	RGCs
1002	4.93e-109	2.64433	1	0.26	1.66e-104	5	ENSG00000132872	SYT4	RGCs
1003	4.57e-74	2.53209	1	0.84	1.53e-69	5	ENSG00000166426	CRABP1	RGCs
1004	1.31e-85	2.50401	1	0.455	4.39e-81	5	ENSG00000137267	TUBB2A	RGCs
1005	8.71e-88	2.49799	1	0.386	2.92e-83	5	ENSG00000172020	GAP43	RGCs
1006	3e-77	2.4081	1	0.923	1.01e-72	5	ENSG00000167552	TUBA1A	RGCs
1007	3.49e-103	2.38361	0.977	0.221	1.17e-98	5	ENSG00000225783	MIAT	RGCs
1008	4.89e-127	2.38259	0.992	0.178	1.64e-122	5	ENSG00000130558	OLFM1	RGCs
1009	2.6e-107	2.28413	1	0.245	8.73e-103	5	ENSG00000173267	SNCG	RGCs
1010	4.53e-81	2.25337	1	0.484	1.52e-76	5	ENSG00000213190	MLLT11	RGCs
1011	8.13e-141	2.17303	0.985	0.14	2.73e-136	5	ENSG00000073670	ADAM11	RGCs
1012	5.87e-170	2.12817	0.992	0.104	1.97e-165	5	ENSG00000198910	L1CAM	RGCs
1013	5.38e-77	2.12348	1	0.554	1.8e-72	5	ENSG00000154277	UCHL1	RGCs
1014	2.26e-125	2.09931	1	0.186	7.58e-121	5	ENSG00000144834	TAGLN3	RGCs
1015	2.43e-153	2.08446	0.985	0.123	8.15e-149	5	ENSG00000187122	SLIT1	RGCs
1016	5.69e-79	2.06825	0.992	0.437	1.91e-74	5	ENSG00000112972	HMGCS1	RGCs
1017	2.76e-142	2.04762	0.985	0.138	9.25e-138	5	ENSG00000162188	GNG3	RGCs
1018	1.58e-161	2.03432	0.977	0.106	5.29e-157	5	ENSG00000016082	ISL1	RGCs
1019	8.49e-126	2.02174	0.992	0.161	2.85e-121	5	ENSG00000162374	ELAVL4	RGCs
1020	1.84e-69	1.86329	1	0.607	6.17e-65	5	ENSG00000092964	DPYSL2	RGCs
1021	1.68e-75	1.86043	1	0.431	5.64e-71	5	ENSG00000090097	PCBP4	RGCs
1022	3.75e-82	1.81103	1	0.351	1.26e-77	5	ENSG00000133169	BEX1	RGCs
1023	2.94e-85	1.80149	0.962	0.294	9.88e-81	5	ENSG00000113161	HMGCR	RGCs
1024	2.68e-101	1.78962	0.985	0.236	8.97e-97	5	ENSG00000111674	ENO2	RGCs
1025	4.13e-147	1.77998	0.977	0.116	1.38e-142	5	ENSG00000165646	SLC18A2	RGCs
1026	1.13e-69	1.76503	1	0.801	3.81e-65	5	ENSG00000143933	CALM2	RGCs
1027	1.46e-129	1.75713	0.962	0.138	4.88e-125	5	ENSG00000277586	NEFL	RGCs
1028	8.9e-74	1.75609	1	0.506	2.99e-69	5	ENSG00000203879	GDI1	RGCs
1029	8.73e-78	1.72851	1	0.417	2.93e-73	5	ENSG00000126214	KLC1	RGCs
1030	2.11e-160	1.72707	0.946	0.089	7.09e-156	5	ENSG00000177551	NHLH2	RGCs
1031	1.94e-76	1.72664	1	0.901	6.5e-72	5	ENSG00000117632	STMN1	RGCs
1032	9.94e-114	1.72615	0.946	0.172	3.34e-109	5	ENSG00000100167	2003-09-01	RGCs
1033	5.49e-88	1.71262	0.954	0.269	1.84e-83	5	ENSG00000145335	SNCA	RGCs
1034	6.29e-103	1.6947	0.931	0.179	2.11e-98	5	ENSG00000108001	EBF3	RGCs
1035	3.28e-101	1.68917	1	0.23	1.1e-96	5	ENSG00000078018	MAP2	RGCs
1036	2.45e-120	1.64208	0.938	0.151	8.23e-116	5	ENSG00000015592	STMN4	RGCs
1037	4.47e-88	1.63779	0.985	0.296	1.5e-83	5	ENSG00000105290	APLP1	RGCs
1038	1.11e-92	1.63559	0.946	0.24	3.71e-88	5	ENSG00000166922	SCG5	RGCs
1039	2.29e-68	1.6217	1	0.543	7.67e-64	5	ENSG00000189159	JPT1	RGCs
1040	1.82e-93	1.61549	0.969	0.251	6.1e-89	5	ENSG00000157851	DPYSL5	RGCs
1041	6.86e-69	1.6004	1	0.512	2.3e-64	5	ENSG00000113657	DPYSL3	RGCs
1042	1.9e-174	1.58918	0.908	0.067	6.36e-170	5	ENSG00000124785	NRN1	RGCs
1043	4.94e-67	1.58904	1	0.55	1.66e-62	5	ENSG00000176788	BASP1	RGCs
1044	1.12e-81	1.58779	0.985	0.304	3.74e-77	5	ENSG00000227051	C14orf132	RGCs
1045	3.32e-64	1.58485	1	0.676	1.11e-59	5	ENSG00000272398	CD24	RGCs
1046	3.61e-100	1.57935	0.962	0.208	1.21e-95	5	ENSG00000171533	MAP6	RGCs
1047	6.76e-66	1.57209	1	0.499	2.27e-61	5	ENSG00000099194	SCD	RGCs
1048	6.35e-78	1.56767	0.977	0.341	2.13e-73	5	ENSG00000145362	ANK2	RGCs
1049	4.33e-102	1.55482	0.954	0.198	1.45e-97	5	ENSG00000151640	DPYSL4	RGCs
1050	6.45e-95	1.53765	0.908	0.184	2.16e-90	5	ENSG00000148908	RGS10	RGCs
1051	9.95e-91	1.51965	0.962	0.237	3.34e-86	5	ENSG00000121966	CXCR4	RGCs
1052	2.48e-95	1.50794	0.969	0.245	8.31e-91	5	ENSG00000120437	ACAT2	RGCs
1053	9.65e-65	1.50087	1	0.675	3.24e-60	5	ENSG00000067225	PKM	RGCs
1054	1.26e-99	1.496	0.954	0.202	4.23e-95	5	ENSG00000157110	RBPMS	RGCs
1055	7.95e-77	1.48939	0.954	0.298	2.67e-72	5	ENSG00000104549	SQLE	RGCs
1056	6.12e-66	1.48359	1	0.69	2.05e-61	5	ENSG00000134308	YWHAQ	RGCs
1057	3.76e-76	1.48311	1	0.974	1.26e-71	5	ENSG00000034510	TMSB10	RGCs
1058	3.32e-102	1.48036	0.969	0.196	1.11e-97	5	ENSG00000156298	TSPAN7	RGCs
1059	2.41e-90	1.47287	0.885	0.185	8.09e-86	5	ENSG00000154917	RAB6B	RGCs
1060	2.81e-119	1.44666	0.938	0.14	9.42e-115	5	ENSG00000080644	CHRNA3	RGCs
1061	1.11e-138	1.4434	0.885	0.092	3.72e-134	5	ENSG00000100095	SEZ6L	RGCs
1062	1.25e-123	1.41407	0.954	0.139	4.19e-119	5	ENSG00000077279	DCX	RGCs
1063	4.86e-62	1.40605	0.954	0.412	1.63e-57	5	ENSG00000169710	FASN	RGCs
1064	4.79e-146	1.38875	0.923	0.097	1.61e-141	5	ENSG00000116852	KIF21B	RGCs
1065	4.3e-150	1.38253	0.892	0.082	1.44e-145	5	ENSG00000108309	RUNDC3A	RGCs
1066	6.56e-159	1.37463	0.892	0.074	2.2e-154	5	ENSG00000186868	MAPT	RGCs
1067	4.44e-91	1.37266	0.954	0.196	1.49e-86	5	ENSG00000104722	NEFM	RGCs
1068	6.89e-114	1.3666	0.908	0.139	2.31e-109	5	ENSG00000152503	TRIM36	RGCs
1069	3e-64	1.36624	0.992	0.43	1.01e-59	5	ENSG00000198911	SREBF2	RGCs
1070	2.16e-67	1.35868	0.985	0.407	7.23e-63	5	ENSG00000079459	FDFT1	RGCs
1071	7.95e-168	1.35515	0.823	0.051	2.67e-163	5	ENSG00000172137	CALB2	RGCs
1072	6.29e-132	1.35465	0.946	0.112	2.11e-127	5	ENSG00000151615	POU4F2	RGCs
1073	4.72e-64	1.35418	0.969	0.407	1.58e-59	5	ENSG00000182809	CRIP2	RGCs
1074	4.69e-88	1.35069	0.969	0.245	1.57e-83	5	ENSG00000075340	ADD2	RGCs
1075	9.4e-81	1.35053	0.946	0.251	3.15e-76	5	ENSG00000170525	PFKFB3	RGCs
1076	9.99e-99	1.3443	0.885	0.154	3.35e-94	5	ENSG00000213420	GPC2	RGCs
1077	3.05e-135	1.34009	0.862	0.09	1.02e-130	5	ENSG00000165868	HSPA12A	RGCs
1078	3.5e-108	1.33892	0.908	0.149	1.17e-103	5	ENSG00000135447	PPP1R1A	RGCs
1079	2.37e-71	1.33554	0.969	0.322	7.95e-67	5	ENSG00000124357	NAGK	RGCs
1080	2.58e-84	1.33375	0.915	0.214	8.66e-80	5	ENSG00000105419	MEIS3	RGCs
1081	2.73e-64	1.32313	0.962	0.388	9.17e-60	5	ENSG00000140941	MAP1LC3B	RGCs
1082	1.39e-128	1.32238	0.938	0.116	4.65e-124	5	ENSG00000149926	FAM57B	RGCs
1083	1.99e-91	1.31617	0.938	0.209	6.68e-87	5	ENSG00000167508	MVD	RGCs
1084	7.26e-84	1.31212	0.946	0.217	2.44e-79	5	ENSG00000160097	FNDC5	RGCs
1085	6.25e-111	1.31031	0.931	0.143	2.09e-106	5	ENSG00000011347	SYT7	RGCs
1086	9.51e-141	1.3038	0.954	0.108	3.19e-136	5	ENSG00000115266	APC2	RGCs
1087	5.69e-99	1.29906	0.962	0.193	1.91e-94	5	ENSG00000188322	SBK1	RGCs
1088	9.6e-69	1.29832	0.977	0.345	3.22e-64	5	ENSG00000138083	SIX3	RGCs
1089	1.65e-83	1.29542	0.954	0.236	5.55e-79	5	ENSG00000168280	KIF5C	RGCs
1090	9.59e-59	1.29533	1	0.639	3.22e-54	5	ENSG00000115310	RTN4	RGCs
1091	2.03e-142	1.29222	0.938	0.102	6.82e-138	5	ENSG00000103034	NDRG4	RGCs
1092	2.96e-57	1.28574	0.969	0.455	9.92e-53	5	ENSG00000176171	BNIP3	RGCs
1093	3.56e-49	1.2854	1	0.626	1.2e-44	5	ENSG00000142669	SH3BGRL3	RGCs
1094	2.56e-63	1.26751	0.962	0.354	8.58e-59	5	ENSG00000131473	ACLY	RGCs
1095	3.6e-72	1.24959	0.938	0.286	1.21e-67	5	ENSG00000160285	LSS	RGCs
1096	2.79e-81	1.24897	0.938	0.237	9.35e-77	5	ENSG00000186469	GNG2	RGCs
1097	8.24e-74	1.24157	0.938	0.261	2.76e-69	5	ENSG00000102109	PCSK1N	RGCs
1098	1.42e-104	1.2322	0.892	0.145	4.77e-100	5	ENSG00000117016	RIMS3	RGCs
1099	2.68e-106	1.2258	0.915	0.151	8.99e-102	5	ENSG00000129355	CDKN2D	RGCs
1100	5.5e-143	1.22303	0.892	0.08	1.84e-138	5	ENSG00000259436	AC010247.2	RGCs
1101	2.31e-80	1.22205	0.908	0.197	7.76e-76	5	ENSG00000164176	EDIL3	RGCs
1102	3.7e-53	1.22152	0.985	0.499	1.24e-48	5	ENSG00000079462	PAFAH1B3	RGCs
1103	8.66e-78	1.21416	0.923	0.242	2.9e-73	5	ENSG00000143324	XPR1	RGCs
1104	1.73e-66	1.21377	0.946	0.293	5.81e-62	5	ENSG00000116133	DHCR24	RGCs
1105	1.99e-56	1.212	0.977	0.414	6.67e-52	5	ENSG00000133134	BEX2	RGCs
1106	8.55e-60	1.20502	0.954	0.408	2.87e-55	5	ENSG00000105379	ETFB	RGCs
1107	8.27e-160	1.20446	0.892	0.073	2.77e-155	5	ENSG00000105613	MAST1	RGCs
1108	3.02e-53	1.19667	0.938	0.396	1.01e-48	5	ENSG00000149294	NCAM1	RGCs
1109	8.65e-84	1.19573	0.908	0.211	2.9e-79	5	ENSG00000018189	RUFY3	RGCs
1110	9.93e-108	1.19144	0.815	0.101	3.33e-103	5	ENSG00000116035	VAX2	RGCs
1111	1.7e-51	1.19106	1	0.633	5.7e-47	5	ENSG00000078369	GNB1	RGCs
1112	6.56e-124	1.18948	0.9	0.11	2.2e-119	5	ENSG00000164742	ADCY1	RGCs
1113	6.36e-77	1.18567	0.9	0.21	2.13e-72	5	ENSG00000131584	ACAP3	RGCs
1114	1.12e-56	1.18198	0.992	0.492	3.77e-52	5	ENSG00000176887	SOX11	RGCs
1115	5.72e-144	1.17983	0.885	0.082	1.92e-139	5	ENSG00000155980	KIF5A	RGCs
1116	7.14e-150	1.17689	0.885	0.081	2.4e-145	5	ENSG00000151320	AKAP6	RGCs
1117	3.01e-53	1.17574	1	0.759	1.01e-48	5	ENSG00000164924	YWHAZ	RGCs
1118	5.42e-54	1.17445	0.977	0.468	1.82e-49	5	ENSG00000105220	GPI	RGCs
1119	7.84e-113	1.16874	0.792	0.084	2.63e-108	5	ENSG00000253230	LINC00599	RGCs
1120	3.6e-53	1.16528	1	0.645	1.21e-48	5	ENSG00000161960	EIF4A1	RGCs
1121	1.26e-58	1.16493	0.962	0.368	4.21e-54	5	ENSG00000108828	VAT1	RGCs
1122	3.68e-66	1.15716	0.962	0.321	1.23e-61	5	ENSG00000166780	C16orf45	RGCs
1123	2.29e-76	1.15323	0.9	0.191	7.66e-72	5	ENSG00000164330	EBF1	RGCs
1124	3.23e-120	1.14281	0.808	0.088	1.08e-115	5	ENSG00000187957	DNER	RGCs
1125	3.78e-79	1.11671	0.892	0.205	1.27e-74	5	ENSG00000084731	KIF3C	RGCs
1126	1.11e-56	1.11508	0.962	0.41	3.72e-52	5	ENSG00000108175	ZMIZ1	RGCs
1127	4.3e-130	1.11463	0.815	0.075	1.44e-125	5	ENSG00000124194	GDAP1L1	RGCs
1128	4.66e-54	1.11355	0.992	0.507	1.56e-49	5	ENSG00000197102	DYNC1H1	RGCs
1129	8.84e-50	1.10985	1	0.743	2.97e-45	5	ENSG00000111669	TPI1	RGCs
1130	4.17e-52	1.10337	0.985	0.475	1.4e-47	5	ENSG00000111897	SERINC1	RGCs
1131	9.68e-129	1.10316	0.869	0.09	3.25e-124	5	ENSG00000104112	SCG3	RGCs
1132	8e-166	1.0991	0.815	0.049	2.68e-161	5	ENSG00000087258	GNAO1	RGCs
1133	1.17e-71	1.09743	0.908	0.245	3.93e-67	5	ENSG00000160271	RALGDS	RGCs
1134	3.28e-68	1.09701	0.923	0.258	1.1e-63	5	ENSG00000130294	KIF1A	RGCs
1135	4e-87	1.097	0.923	0.18	1.34e-82	5	ENSG00000135596	MICAL1	RGCs
1136	1.04e-51	1.09677	0.969	0.462	3.49e-47	5	ENSG00000127616	SMARCA4	RGCs
1137	1.93e-53	1.09596	0.977	0.42	6.48e-49	5	ENSG00000171604	CXXC5	RGCs
1138	1.44e-90	1.09485	0.831	0.137	4.84e-86	5	ENSG00000103647	CORO2B	RGCs
1139	1.99e-131	1.09315	0.854	0.083	6.66e-127	5	ENSG00000163618	CADPS	RGCs
1140	5.12e-63	1.09034	0.977	0.292	1.72e-58	5	ENSG00000259439	LINC01833	RGCs
1141	2.44e-52	1.08918	0.985	0.425	8.17e-48	5	ENSG00000117410	ATP6V0B	RGCs
1142	6.77e-145	1.08826	0.854	0.072	2.27e-140	5	ENSG00000149243	KLHL35	RGCs
1143	4.19e-65	1.0816	0.931	0.278	1.41e-60	5	ENSG00000197457	STMN3	RGCs
1144	1.03e-147	1.08158	0.838	0.066	3.45e-143	5	ENSG00000198400	NTRK1	RGCs
1145	6.59e-55	1.07844	0.931	0.354	2.21e-50	5	ENSG00000134313	KIDINS220	RGCs
1146	2.02e-195	1.07828	0.823	0.035	6.77e-191	5	ENSG00000215397	SCRT2	RGCs
1147	1.03e-52	1.07743	0.931	0.398	3.44e-48	5	ENSG00000166848	TERF2IP	RGCs
1148	8.18e-47	1.07672	1	0.474	2.74e-42	5	ENSG00000007372	PAX6	RGCs
1149	2.47e-115	1.07658	0.831	0.099	8.28e-111	5	ENSG00000084628	NKAIN1	RGCs
1150	1.09e-155	1.07585	0.838	0.058	3.66e-151	5	ENSG00000159409	CELF3	RGCs
1151	1.46e-58	1.07481	0.938	0.329	4.89e-54	5	ENSG00000137942	FNBP1L	RGCs
1152	9.83e-152	1.07321	0.808	0.058	3.3e-147	5	ENSG00000163531	NFASC	RGCs
1153	4.98e-87	1.07105	0.846	0.149	1.67e-82	5	ENSG00000167178	ISLR2	RGCs
1154	9.66e-53	1.07003	0.954	0.454	3.24e-48	5	ENSG00000170027	YWHAG	RGCs
1155	5.3e-114	1.06887	0.869	0.11	1.78e-109	5	ENSG00000125851	PCSK2	RGCs
1156	1.11e-124	1.06678	0.877	0.092	3.73e-120	5	ENSG00000254377	MIR124-2HG	RGCs
1157	3.34e-64	1.06616	0.892	0.262	1.12e-59	5	ENSG00000171033	PKIA	RGCs
1158	6.05e-80	1.06056	0.946	0.222	2.03e-75	5	ENSG00000151693	ASAP2	RGCs
1159	5.49e-127	1.05404	0.808	0.077	1.84e-122	5	ENSG00000132821	VSTM2L	RGCs
1160	4.85e-132	1.05223	0.831	0.083	1.62e-127	5	ENSG00000105649	RAB3A	RGCs
1161	4.1e-102	1.05219	0.885	0.126	1.38e-97	5	ENSG00000185008	ROBO2	RGCs
1162	2.34e-37	1.05011	1	0.581	7.86e-33	5	ENSG00000109046	WSB1	RGCs
1163	4.7e-46	1.04964	0.969	0.487	1.58e-41	5	ENSG00000197694	SPTAN1	RGCs
1164	7.16e-66	1.04956	0.969	0.324	2.4e-61	5	ENSG00000078668	VDAC3	RGCs
1165	3.15e-109	1.04037	0.892	0.122	1.06e-104	5	ENSG00000169783	LINGO1	RGCs
1166	1.41e-104	1.03637	0.838	0.114	4.72e-100	5	ENSG00000159164	SV2A	RGCs
1167	1.36e-77	1.03598	0.869	0.181	4.57e-73	5	ENSG00000130827	PLXNA3	RGCs
1168	1.41e-95	1.03355	0.869	0.142	4.71e-91	5	ENSG00000169862	CTNND2	RGCs
1169	1.32e-151	1.03132	0.808	0.058	4.41e-147	5	ENSG00000131037	EPS8L1	RGCs
1170	1.91e-50	1.02987	0.969	0.475	6.39e-46	5	ENSG00000133318	RTN3	RGCs
1171	8.86e-49	1.0237	0.992	0.586	2.97e-44	5	ENSG00000102144	PGK1	RGCs
1172	4.51e-69	1.02145	0.877	0.219	1.51e-64	5	ENSG00000186480	INSIG1	RGCs
1173	1.81e-55	1.02102	0.946	0.307	6.08e-51	5	ENSG00000150625	GPM6A	RGCs
1174	5.11e-53	1.01857	0.877	0.287	1.71e-48	5	ENSG00000052802	MSMO1	RGCs
1175	9.7e-44	1.01817	1	0.739	3.25e-39	5	ENSG00000113558	SKP1	RGCs
1176	2.36e-151	1.01687	0.838	0.062	7.92e-147	5	ENSG00000170091	NSG2	RGCs
1177	2.14e-140	1.01403	0.862	0.078	7.18e-136	5	ENSG00000118432	CNR1	RGCs
1178	1.51e-47	1.01149	1	0.631	5.06e-43	5	ENSG00000160014	CALM3	RGCs
1179	1.54e-117	1.00894	0.831	0.092	5.18e-113	5	ENSG00000174938	SEZ6L2	RGCs
1180	8.04e-106	1.00834	0.792	0.099	2.7e-101	5	ENSG00000066032	CTNNA2	RGCs
1181	1.12e-84	1.00775	0.9	0.184	3.76e-80	5	ENSG00000167535	CACNB3	RGCs
1182	4.6e-106	1.00647	0.846	0.108	1.54e-101	5	ENSG00000139220	PPFIA2	RGCs
1183	4.03e-150	1.00306	0.846	0.065	1.35e-145	5	ENSG00000106536	POU6F2	RGCs
1184	1.49e-71	1.00272	0.892	0.214	4.99e-67	5	ENSG00000175274	TP53I11	RGCs
1185	8.04e-61	1.00186	0.954	0.281	2.7e-56	5	ENSG00000145284	SCD5	RGCs
1186	8.22e-74	1.00024	0.877	0.202	2.76e-69	5	ENSG00000097021	ACOT7	RGCs
1187	1.09e-46	0.999029	1	0.789	3.65e-42	5	ENSG00000175130	MARCKSL1	RGCs
1188	1.11e-46	0.997381	0.977	0.456	3.71e-42	5	ENSG00000128245	YWHAH	RGCs
1189	1.06e-115	0.995836	0.854	0.101	3.55e-111	5	ENSG00000107105	ELAVL2	RGCs
1190	1.94e-42	0.994028	1	0.723	6.5e-38	5	ENSG00000134333	LDHA	RGCs
1191	5.5e-71	0.992703	0.915	0.231	1.85e-66	5	ENSG00000136854	STXBP1	RGCs
1192	7.29e-39	0.992296	1	0.727	2.45e-34	5	ENSG00000166165	CKB	RGCs
1193	7.47e-175	0.988477	0.7	0.025	2.51e-170	5	ENSG00000157005	SST	RGCs
1194	1.82e-118	0.985652	0.8	0.084	6.11e-114	5	ENSG00000065609	SNAP91	RGCs
1195	3.52e-44	0.985539	0.954	0.408	1.18e-39	5	ENSG00000241973	PI4KA	RGCs
1196	1.49e-113	0.979599	0.808	0.09	4.99e-109	5	ENSG00000176749	CDK5R1	RGCs
1197	9.73e-59	0.978419	0.892	0.26	3.26e-54	5	ENSG00000166562	SEC11C	RGCs
1198	1.25e-50	0.976645	0.915	0.328	4.19e-46	5	ENSG00000173801	JUP	RGCs
1199	2.7e-164	0.976634	0.8	0.046	9.04e-160	5	ENSG00000196132	MYT1	RGCs
1200	8.09e-151	0.974734	0.862	0.067	2.71e-146	5	ENSG00000167371	PRRT2	RGCs
1201	2.48e-70	0.97296	0.862	0.202	8.33e-66	5	ENSG00000119782	FKBP1B	RGCs
1202	6.95e-147	0.971233	0.831	0.063	2.33e-142	5	ENSG00000258947	TUBB3	RGCs
1203	1.64e-66	0.97095	0.862	0.197	5.48e-62	5	ENSG00000004777	ARHGAP33	RGCs
1204	3.47e-134	0.970767	0.854	0.083	1.16e-129	5	ENSG00000003249	DBNDD1	RGCs
1205	3.24e-58	0.969936	0.892	0.277	1.09e-53	5	ENSG00000067064	IDI1	RGCs
1206	1.79e-98	0.965186	0.769	0.096	5.99e-94	5	ENSG00000105409	ATP1A3	RGCs
1207	3.13e-157	0.964047	0.777	0.046	1.05e-152	5	ENSG00000221946	FXYD7	RGCs
1208	2.68e-87	0.962507	0.792	0.128	8.99e-83	5	ENSG00000240694	PNMA2	RGCs
1209	3.61e-117	0.962382	0.838	0.095	1.21e-112	5	ENSG00000165434	PGM2L1	RGCs
1210	6.23e-46	0.962261	0.985	0.482	2.09e-41	5	ENSG00000137726	FXYD6	RGCs
1211	7.2e-87	0.961801	0.885	0.152	2.41e-82	5	ENSG00000205336	ADGRG1	RGCs
1212	1.07e-157	0.959063	0.777	0.046	3.6e-153	5	ENSG00000101204	CHRNA4	RGCs
1213	1.59e-62	0.958676	0.915	0.27	5.32e-58	5	ENSG00000163539	CLASP2	RGCs
1214	1.46e-162	0.95601	0.777	0.044	4.88e-158	5	ENSG00000177875	CCDC184	RGCs
1215	9.51e-164	0.9558	0.777	0.043	3.19e-159	5	ENSG00000103056	SMPD3	RGCs
1216	2.36e-126	0.952736	0.8	0.07	7.91e-122	5	ENSG00000145920	CPLX2	RGCs
1217	9.01e-144	0.948546	0.754	0.051	3.02e-139	5	ENSG00000143171	RXRG	RGCs
1218	7.37e-147	0.946223	0.846	0.066	2.47e-142	5	ENSG00000132639	SNAP25	RGCs
1219	3.23e-127	0.945305	0.785	0.07	1.08e-122	5	ENSG00000002933	TMEM176A	RGCs
1220	4.59e-66	0.944548	0.908	0.213	1.54e-61	5	ENSG00000064547	LPAR2	RGCs
1221	9.15e-52	0.940901	0.931	0.348	3.07e-47	5	ENSG00000166313	APBB1	RGCs
1222	6.96e-48	0.940816	0.938	0.384	2.34e-43	5	ENSG00000054523	KIF1B	RGCs
1223	1.52e-41	0.939167	1	0.734	5.1e-37	5	ENSG00000123144	TRIR	RGCs
1224	3.46e-143	0.926195	0.8	0.059	1.16e-138	5	ENSG00000089199	CHGB	RGCs
1225	5.46e-151	0.925462	0.723	0.04	1.83e-146	5	ENSG00000159387	IRX6	RGCs
1226	2.61e-53	0.924518	0.938	0.333	8.77e-49	5	ENSG00000175582	RAB6A	RGCs
1227	4.76e-54	0.924076	0.931	0.32	1.6e-49	5	ENSG00000105270	CLIP3	RGCs
1228	1.84e-112	0.922277	0.769	0.078	6.18e-108	5	ENSG00000274956	AC120042.3	RGCs
1229	4.67e-61	0.918138	0.885	0.222	1.57e-56	5	ENSG00000129946	SHC2	RGCs
1230	3.74e-87	0.91811	0.8	0.121	1.25e-82	5	ENSG00000170561	IRX2	RGCs
1231	2.75e-42	0.91585	1	0.733	9.21e-38	5	ENSG00000263001	GTF2I	RGCs
1232	1.68e-59	0.915394	0.877	0.24	5.63e-55	5	ENSG00000082397	EPB41L3	RGCs
1233	2.13e-41	0.914108	0.985	0.497	7.15e-37	5	ENSG00000130985	UBA1	RGCs
1234	3.31e-84	0.91322	0.915	0.167	1.11e-79	5	ENSG00000248540	AC010931.2	RGCs
1235	3.93e-38	0.908278	0.992	0.593	1.32e-33	5	ENSG00000075618	FSCN1	RGCs
1236	6.45e-58	0.906078	0.938	0.28	2.16e-53	5	ENSG00000137817	PARP6	RGCs
1237	3.17e-40	0.903426	0.977	0.561	1.06e-35	5	ENSG00000034713	GABARAPL2	RGCs
1238	2.06e-88	0.902941	0.762	0.108	6.9e-84	5	ENSG00000067840	PDZD4	RGCs
1239	5.17e-56	0.901046	1	0.916	1.73e-51	5	ENSG00000196230	TUBB	RGCs
1240	5.08e-114	0.900635	0.777	0.08	1.7e-109	5	ENSG00000106772	PRUNE2	RGCs
1241	1.41e-41	0.897169	0.985	0.585	4.72e-37	5	ENSG00000166136	NDUFB8	RGCs
1242	9.62e-38	0.896691	0.938	0.54	3.23e-33	5	ENSG00000143198	MGST3	RGCs
1243	2.67e-66	0.89396	0.862	0.205	8.94e-62	5	ENSG00000125821	DTD1	RGCs
1244	1.73e-96	0.892843	0.869	0.128	5.79e-92	5	ENSG00000067715	SYT1	RGCs
1245	1.31e-44	0.890377	0.946	0.433	4.39e-40	5	ENSG00000160752	FDPS	RGCs
1246	2.57e-101	0.889763	0.823	0.107	8.64e-97	5	ENSG00000105255	FSD1	RGCs
1247	1.18e-35	0.887924	0.992	0.646	3.96e-31	5	ENSG00000136888	ATP6V1G1	RGCs
1248	3.99e-61	0.886792	0.885	0.242	1.34e-56	5	ENSG00000197183	NOL4L	RGCs
1249	1.11e-77	0.885297	0.838	0.162	3.73e-73	5	ENSG00000118263	KLF7	RGCs
1250	5.73e-86	0.884212	0.854	0.145	1.92e-81	5	ENSG00000133083	DCLK1	RGCs
1251	3.08e-63	0.88185	0.754	0.153	1.03e-58	5	ENSG00000196123	KIAA0895L	RGCs
1252	2.89e-47	0.880941	0.954	0.398	9.7e-43	5	ENSG00000142949	PTPRF	RGCs
1253	3.82e-33	0.876744	0.985	0.569	1.28e-28	5	ENSG00000053438	NNAT	RGCs
1254	3.87e-151	0.875524	0.708	0.037	1.3e-146	5	ENSG00000152192	POU4F1	RGCs
1255	2.52e-44	0.873794	0.892	0.328	8.47e-40	5	ENSG00000182272	B4GALNT4	RGCs
1256	9.68e-37	0.870912	0.923	0.503	3.25e-32	5	ENSG00000146425	DYNLT1	RGCs
1257	5.41e-62	0.870746	0.831	0.196	1.82e-57	5	ENSG00000236782	AL391650.1	RGCs
1258	6.91e-79	0.870665	0.777	0.129	2.32e-74	5	ENSG00000067057	PFKP	RGCs
1259	2.99e-51	0.869719	0.892	0.258	1e-46	5	ENSG00000107281	NPDC1	RGCs
1260	1.11e-68	0.868081	0.892	0.212	3.71e-64	5	ENSG00000137343	ATAT1	RGCs
1261	4.75e-60	0.866898	0.915	0.24	1.59e-55	5	ENSG00000189056	RELN	RGCs
1262	6.72e-57	0.863878	0.9	0.249	2.25e-52	5	ENSG00000131149	GSE1	RGCs
1263	1.42e-56	0.859911	0.9	0.26	4.76e-52	5	ENSG00000111371	SLC38A1	RGCs
1264	1.7e-109	0.859374	0.785	0.09	5.69e-105	5	ENSG00000055118	KCNH2	RGCs
1265	5.66e-36	0.854909	0.992	0.736	1.9e-31	5	ENSG00000167815	PRDX2	RGCs
1266	4.69e-105	0.854062	0.762	0.081	1.57e-100	5	ENSG00000168546	GFRA2	RGCs
1267	8.78e-42	0.851609	0.892	0.331	2.94e-37	5	ENSG00000103145	HCFC1R1	RGCs
1268	9.8e-112	0.851057	0.762	0.078	3.29e-107	5	ENSG00000124191	TOX2	RGCs
1269	5.16e-37	0.851045	1	0.796	1.73e-32	5	ENSG00000114115	RBP1	RGCs
1270	1.32e-133	0.850493	0.769	0.059	4.42e-129	5	ENSG00000008300	CELSR3	RGCs
1271	1.82e-58	0.849632	0.915	0.255	6.1e-54	5	ENSG00000146083	RNF44	RGCs
1272	1.12e-40	0.846716	0.954	0.436	3.77e-36	5	ENSG00000182534	MXRA7	RGCs
1273	4.46e-41	0.843011	0.977	0.453	1.5e-36	5	ENSG00000120727	PAIP2	RGCs
1274	4.06e-110	0.841837	0.815	0.093	1.36e-105	5	ENSG00000171224	FAM241B	RGCs
1275	1.96e-39	0.834879	0.908	0.397	6.59e-35	5	ENSG00000172115	CYCS	RGCs
1276	1.93e-63	0.832097	0.869	0.209	6.49e-59	5	ENSG00000160753	RUSC1	RGCs
1277	1.16e-41	0.830851	0.885	0.346	3.88e-37	5	ENSG00000120265	PCMT1	RGCs
1278	8.27e-44	0.830147	0.938	0.368	2.77e-39	5	ENSG00000188157	AGRN	RGCs
1279	7.36e-48	0.829774	0.9	0.308	2.47e-43	5	ENSG00000132718	SYT11	RGCs
1280	2.77e-50	0.826104	0.877	0.281	9.29e-46	5	ENSG00000079950	STX7	RGCs
1281	1.21e-48	0.82526	0.915	0.328	4.07e-44	5	ENSG00000134824	FADS2	RGCs
1282	2.43e-42	0.82498	0.946	0.424	8.14e-38	5	ENSG00000173457	PPP1R14B	RGCs
1283	2.12e-141	0.82289	0.769	0.053	7.11e-137	5	ENSG00000167654	ATCAY	RGCs
1284	8.86e-70	0.822266	0.808	0.158	2.97e-65	5	ENSG00000129682	FGF13	RGCs
1285	3.75e-157	0.820822	0.662	0.026	1.26e-152	5	ENSG00000152214	RIT2	RGCs
1286	2.06e-153	0.817522	0.7	0.034	6.9e-149	5	ENSG00000177679	SRRM3	RGCs
1287	2.8e-109	0.817234	0.808	0.087	9.4e-105	5	ENSG00000019505	SYT13	RGCs
1288	3.4e-108	0.815462	0.808	0.089	1.14e-103	5	ENSG00000196361	ELAVL3	RGCs
1289	3.08e-121	0.812131	0.785	0.073	1.03e-116	5	ENSG00000008735	MAPK8IP2	RGCs
1290	1.92e-41	0.811734	0.985	0.59	6.43e-37	5	ENSG00000196405	EVL	RGCs
1291	1.52e-105	0.808341	0.731	0.075	5.1e-101	5	ENSG00000064763	FAR2	RGCs
1292	8.29e-42	0.803319	0.938	0.368	2.78e-37	5	ENSG00000182985	CADM1	RGCs
1293	3.66e-35	0.800811	1	0.82	1.23e-30	5	ENSG00000134986	NREP	RGCs
1294	3.81e-43	0.799423	0.977	0.399	1.28e-38	5	ENSG00000129197	RPAIN	RGCs
1295	5.44e-80	0.798313	0.754	0.116	1.83e-75	5	ENSG00000084710	EFR3B	RGCs
1296	1.22e-47	0.797374	0.838	0.254	4.11e-43	5	ENSG00000096092	TMEM14A	RGCs
1297	3.14e-47	0.79492	0.931	0.356	1.05e-42	5	ENSG00000099864	PALM	RGCs
1298	3.01e-87	0.794623	0.731	0.095	1.01e-82	5	ENSG00000166831	RBPMS2	RGCs
1299	7.41e-156	0.793069	0.738	0.039	2.49e-151	5	ENSG00000130287	NCAN	RGCs
1300	1.94e-58	0.792871	0.831	0.196	6.51e-54	5	ENSG00000159713	TPPP3	RGCs
1301	6.58e-116	0.792199	0.715	0.06	2.21e-111	5	ENSG00000188803	SHISA6	RGCs
1302	2.11e-34	0.78849	1	0.688	7.08e-30	5	ENSG00000118816	CCNI	RGCs
1303	2.83e-42	0.787012	0.892	0.348	9.47e-38	5	ENSG00000204843	DCTN1	RGCs
1304	2.28e-85	0.785095	0.792	0.127	7.63e-81	5	ENSG00000104833	TUBB4A	RGCs
1305	7.64e-47	0.785039	0.823	0.254	2.56e-42	5	ENSG00000101220	C20orf27	RGCs
1306	3.32e-165	0.784505	0.7	0.028	1.11e-160	5	ENSG00000148408	CACNA1B	RGCs
1307	7.96e-160	0.783672	0.654	0.025	2.67e-155	5	ENSG00000259663	AC010478.1	RGCs
1308	4.22e-44	0.782186	0.869	0.289	1.42e-39	5	ENSG00000137868	STRA6	RGCs
1309	7.07e-56	0.781853	0.854	0.231	2.37e-51	5	ENSG00000198722	UNC13B	RGCs
1310	4.94e-61	0.779033	0.846	0.198	1.66e-56	5	ENSG00000114739	ACVR2B	RGCs
1311	4.72e-42	0.777327	0.877	0.275	1.58e-37	5	ENSG00000183036	PCP4	RGCs
1312	7.64e-49	0.7747	0.769	0.213	2.56e-44	5	ENSG00000155093	PTPRN2	RGCs
1313	2.16e-33	0.774612	0.862	0.335	7.24e-29	5	ENSG00000064607	SUGP2	RGCs
1314	1.28e-62	0.774365	0.831	0.198	4.29e-58	5	ENSG00000144635	DYNC1LI1	RGCs
1315	2.17e-35	0.774276	0.954	0.45	7.29e-31	5	ENSG00000213923	CSNK1E	RGCs
1316	1.48e-79	0.773119	0.708	0.102	4.95e-75	5	ENSG00000128266	GNAZ	RGCs
1317	3.97e-46	0.771214	0.877	0.293	1.33e-41	5	ENSG00000145247	OCIAD2	RGCs
1318	7.36e-58	0.770661	0.838	0.204	2.47e-53	5	ENSG00000147044	CASK	RGCs
1319	1.64e-47	0.770359	0.846	0.254	5.48e-43	5	ENSG00000107863	ARHGAP21	RGCs
1320	6.05e-69	0.770083	0.792	0.156	2.03e-64	5	ENSG00000033627	ATP6V0A1	RGCs
1321	7.5e-73	0.76999	0.738	0.124	2.52e-68	5	ENSG00000120875	DUSP4	RGCs
1322	1.19e-48	0.76846	0.892	0.304	4e-44	5	ENSG00000264364	DYNLL2	RGCs
1323	1.7e-33	0.768163	0.985	0.674	5.71e-29	5	ENSG00000112514	CUTA	RGCs
1324	3.98e-38	0.767002	0.908	0.418	1.34e-33	5	ENSG00000077380	DYNC1I2	RGCs
1325	7.96e-57	0.76602	0.915	0.223	2.67e-52	5	ENSG00000144485	HES6	RGCs
1326	2.15e-60	0.765737	0.792	0.184	7.22e-56	5	ENSG00000181541	MAB21L2	RGCs
1327	2.29e-61	0.765684	0.823	0.181	7.68e-57	5	ENSG00000054793	ATP9A	RGCs
1328	8.62e-37	0.764839	0.992	0.685	2.89e-32	5	ENSG00000159335	PTMS	RGCs
1329	7.79e-41	0.76333	0.869	0.3	2.61e-36	5	ENSG00000133612	AGAP3	RGCs
1330	2.1e-130	0.762775	0.685	0.045	7.05e-126	5	ENSG00000184524	CEND1	RGCs
1331	2.22e-34	0.762337	1	0.76	7.45e-30	5	ENSG00000074800	ENO1	RGCs
1332	1.16e-107	0.762289	0.723	0.072	3.9e-103	5	ENSG00000188573	FBLL1	RGCs
1333	1.07e-50	0.761782	0.892	0.272	3.58e-46	5	ENSG00000119185	ITGB1BP1	RGCs
1334	2.6e-80	0.761606	0.823	0.133	8.74e-76	5	ENSG00000090932	DLL3	RGCs
1335	5.82e-39	0.761511	0.815	0.284	1.95e-34	5	ENSG00000130066	SAT1	RGCs
1336	1.08e-35	0.758923	0.962	0.488	3.63e-31	5	ENSG00000105254	TBCB	RGCs
1337	4.9e-46	0.758821	0.823	0.245	1.64e-41	5	ENSG00000204681	GABBR1	RGCs
1338	7.8e-38	0.757596	1	0.794	2.62e-33	5	ENSG00000112695	COX7A2	RGCs
1339	1.84e-47	0.75627	0.931	0.286	6.16e-43	5	ENSG00000215790	SLC35E2A	RGCs
1340	2.77e-122	0.754809	0.692	0.051	9.28e-118	5	ENSG00000153012	LGI2	RGCs
1341	5.48e-56	0.754647	0.838	0.219	1.84e-51	5	ENSG00000196526	AFAP1	RGCs
1342	7.25e-45	0.754208	0.954	0.372	2.43e-40	5	ENSG00000204580	DDR1	RGCs
1343	2.31e-105	0.753682	0.738	0.076	7.76e-101	5	ENSG00000173114	LRRN3	RGCs
1344	8.82e-34	0.75276	0.938	0.498	2.96e-29	5	ENSG00000175203	DCTN2	RGCs
1345	1.65e-34	0.750642	0.8	0.296	5.53e-30	5	ENSG00000189180	ZNF33A	RGCs
1346	1.58e-66	0.750482	0.877	0.195	5.3e-62	5	ENSG00000166974	MAPRE2	RGCs
1347	1.57e-39	0.749474	0.9	0.354	5.28e-35	5	ENSG00000106799	TGFBR1	RGCs
1348	5.22e-131	0.74877	0.692	0.044	1.75e-126	5	ENSG00000139767	SRRM4	RGCs
1349	4.19e-80	0.748457	0.8	0.122	1.4e-75	5	ENSG00000018236	CNTN1	RGCs
1350	2.95e-53	0.745551	0.808	0.205	9.9e-49	5	ENSG00000161642	ZNF385A	RGCs
1351	2.33e-64	0.745313	0.854	0.19	7.82e-60	5	ENSG00000165443	PHYHIPL	RGCs
1352	4.41e-35	0.744039	0.969	0.554	1.48e-30	5	ENSG00000196591	HDAC2	RGCs
1353	3.13e-76	0.74366	0.754	0.123	1.05e-71	5	ENSG00000257151	PWAR6	RGCs
1354	1.07e-32	0.743291	1	0.75	3.6e-28	5	ENSG00000230989	HSBP1	RGCs
1355	8.89e-39	0.742482	0.823	0.292	2.98e-34	5	ENSG00000182093	WRB	RGCs
1356	1.56e-106	0.742165	0.546	0.034	5.22e-102	5	ENSG00000122585	NPY	RGCs
1357	2.15e-77	0.74136	0.746	0.116	7.22e-73	5	ENSG00000143850	PLEKHA6	RGCs
1358	2.64e-35	0.740748	0.977	0.582	8.85e-31	5	ENSG00000136810	TXN	RGCs
1359	3.03e-46	0.740717	0.877	0.27	1.02e-41	5	ENSG00000109736	MFSD10	RGCs
1360	4.81e-34	0.74042	0.992	0.75	1.61e-29	5	ENSG00000241837	ATP5PO	RGCs
1361	3.28e-32	0.74005	0.915	0.443	1.1e-27	5	ENSG00000204463	BAG6	RGCs
1362	6.13e-30	0.739368	0.977	0.663	2.06e-25	5	ENSG00000161203	AP2M1	RGCs
1363	4.8e-28	0.737562	0.946	0.441	1.61e-23	5	ENSG00000221978	CCNL2	RGCs
1364	1.32e-44	0.734949	0.738	0.206	4.42e-40	5	ENSG00000184602	SNN	RGCs
1365	6.84e-110	0.734407	0.654	0.051	2.29e-105	5	ENSG00000157064	NMNAT2	RGCs
1366	1.55e-87	0.730657	0.769	0.105	5.2e-83	5	ENSG00000104381	GDAP1	RGCs
1367	1.96e-75	0.730111	0.831	0.147	6.56e-71	5	ENSG00000198720	ANKRD13B	RGCs
1368	4.07e-89	0.728873	0.7	0.084	1.37e-84	5	ENSG00000165644	COMTD1	RGCs
1369	1.11e-60	0.728138	0.838	0.186	3.73e-56	5	ENSG00000143126	CELSR2	RGCs
1370	7.29e-35	0.727114	0.831	0.315	2.45e-30	5	ENSG00000149925	ALDOA	RGCs
1371	1.07e-32	0.724947	0.938	0.48	3.57e-28	5	ENSG00000102409	BEX4	RGCs
1372	6.9e-52	0.721743	0.885	0.254	2.31e-47	5	ENSG00000154639	CXADR	RGCs
1373	8.17e-71	0.719221	0.892	0.166	2.74e-66	5	ENSG00000179774	ATOH7	RGCs
1374	2.36e-35	0.718711	1	0.827	7.9e-31	5	ENSG00000172757	CFL1	RGCs
1375	4e-112	0.718693	0.685	0.058	1.34e-107	5	ENSG00000109956	B3GAT1	RGCs
1376	3.37e-69	0.717369	0.8	0.16	1.13e-64	5	ENSG00000171130	ATP6V0E2	RGCs
1377	4.76e-42	0.715408	0.8	0.244	1.6e-37	5	ENSG00000167081	PBX3	RGCs
1378	2.98e-30	0.714966	0.946	0.459	1e-25	5	ENSG00000138495	COX17	RGCs
1379	1.76e-153	0.712944	0.7	0.034	5.91e-149	5	ENSG00000136928	GABBR2	RGCs
1380	1.15e-49	0.712914	0.846	0.23	3.85e-45	5	ENSG00000103657	HERC1	RGCs
1381	1.55e-47	0.711878	0.854	0.264	5.21e-43	5	ENSG00000159023	EPB41	RGCs
1382	1.38e-31	0.711106	0.915	0.431	4.64e-27	5	ENSG00000007168	PAFAH1B1	RGCs
1383	3.71e-52	0.711031	0.846	0.222	1.24e-47	5	ENSG00000140718	FTO	RGCs
1384	3.18e-25	0.710715	0.962	0.583	1.07e-20	5	ENSG00000128272	ATF4	RGCs
1385	1.56e-51	0.710057	0.854	0.227	5.25e-47	5	ENSG00000034053	APBA2	RGCs
1386	1.29e-33	0.709926	1	0.786	4.32e-29	5	ENSG00000109971	HSPA8	RGCs
1387	1.11e-51	0.709203	0.877	0.226	3.74e-47	5	ENSG00000143995	MEIS1	RGCs
1388	2.91e-76	0.707884	0.715	0.105	9.77e-72	5	ENSG00000075461	CACNG4	RGCs
1389	1.52e-38	0.706968	0.923	0.362	5.09e-34	5	ENSG00000241685	ARPC1A	RGCs
1390	3.63e-60	0.706658	0.8	0.175	1.22e-55	5	ENSG00000188042	ARL4C	RGCs
1391	4.74e-56	0.706465	1	0.961	1.59e-51	5	ENSG00000184009	ACTG1	RGCs
1392	1.01e-57	0.706084	0.831	0.194	3.37e-53	5	ENSG00000198478	SH3BGRL2	RGCs
1393	3.57e-26	0.705269	0.9	0.516	1.2e-21	5	ENSG00000128739	SNRPN	RGCs
1394	3.15e-104	0.705221	0.623	0.05	1.06e-99	5	ENSG00000130540	SULT4A1	RGCs
1395	1.04e-30	0.704195	0.962	0.499	3.48e-26	5	ENSG00000131507	NDFIP1	RGCs
1396	2.92e-116	0.70408	0.685	0.052	9.81e-112	5	ENSG00000134594	RAB33A	RGCs
1397	1.84e-69	0.703909	0.723	0.12	6.16e-65	5	ENSG00000128872	TMOD2	RGCs
1398	8.28e-60	0.703254	0.762	0.158	2.78e-55	5	ENSG00000139112	GABARAPL1	RGCs
1399	1.89e-45	0.700615	0.831	0.253	6.35e-41	5	ENSG00000138413	IDH1	RGCs
1400	3.23e-29	0.700363	0.954	0.527	1.08e-24	5	ENSG00000239672	NME1	RGCs
1401	5.56e-156	0.696708	0.669	0.028	1.86e-151	5	ENSG00000152932	RAB3C	RGCs
1402	2.51e-64	0.693991	0.792	0.159	8.43e-60	5	ENSG00000107643	MAPK8	RGCs
1403	6.16e-121	0.693776	0.638	0.041	2.07e-116	5	ENSG00000186648	CARMIL3	RGCs
1404	3.59e-68	0.692394	0.785	0.143	1.2e-63	5	ENSG00000026652	AGPAT4	RGCs
1405	9.96e-87	0.691817	0.8	0.117	3.34e-82	5	ENSG00000141622	RNF165	RGCs
1406	1.23e-105	0.690494	0.7	0.068	4.12e-101	5	ENSG00000084764	MAPRE3	RGCs
1407	2.76e-29	0.690103	0.977	0.618	9.25e-25	5	ENSG00000105568	PPP2R1A	RGCs
1408	1.84e-54	0.689825	0.9	0.223	6.17e-50	5	ENSG00000198963	RORB	RGCs
1409	5.79e-68	0.689489	0.685	0.113	1.94e-63	5	ENSG00000109107	ALDOC	RGCs
1410	1.07e-83	0.688213	0.662	0.083	3.58e-79	5	ENSG00000156475	PPP2R2B	RGCs
1411	4.27e-33	0.687672	0.923	0.381	1.43e-28	5	ENSG00000152556	PFKM	RGCs
1412	1.54e-123	0.687026	0.623	0.036	5.17e-119	5	ENSG00000261678	SCRT1	RGCs
1413	4.71e-30	0.685014	0.908	0.453	1.58e-25	5	ENSG00000167397	VKORC1	RGCs
1414	1.87e-58	0.684656	0.838	0.207	6.28e-54	5	ENSG00000075945	KIFAP3	RGCs
1415	1.21e-53	0.683778	0.808	0.2	4.07e-49	5	ENSG00000120693	SMAD9	RGCs
1416	1.5e-104	0.681989	0.746	0.08	5.01e-100	5	ENSG00000076554	TPD52	RGCs
1417	3.7e-34	0.678868	0.946	0.505	1.24e-29	5	ENSG00000086061	DNAJA1	RGCs
1418	8.16e-41	0.677525	0.831	0.283	2.74e-36	5	ENSG00000220205	VAMP2	RGCs
1419	2.01e-69	0.677157	0.731	0.125	6.76e-65	5	ENSG00000173898	SPTBN2	RGCs
1420	2.24e-34	0.677097	0.892	0.366	7.5e-30	5	ENSG00000004487	KDM1A	RGCs
1421	1.28e-29	0.676314	0.977	0.689	4.29e-25	5	ENSG00000171314	PGAM1	RGCs
1422	5.75e-100	0.676067	0.669	0.064	1.93e-95	5	ENSG00000213760	ATP6V1G2	RGCs
1423	3.41e-30	0.675281	0.946	0.539	1.14e-25	5	ENSG00000165637	VDAC2	RGCs
1424	6.32e-38	0.675253	0.823	0.289	2.12e-33	5	ENSG00000102172	SMS	RGCs
1425	2.88e-46	0.674755	0.892	0.287	9.67e-42	5	ENSG00000151914	DST	RGCs
1426	3.03e-40	0.67459	0.915	0.298	1.02e-35	5	ENSG00000153707	PTPRD	RGCs
1427	1.26e-81	0.674533	0.762	0.113	4.22e-77	5	ENSG00000197535	MYO5A	RGCs
1428	6.08e-145	0.674265	0.631	0.028	2.04e-140	5	ENSG00000106789	CORO2A	RGCs
1429	3.11e-49	0.6732	0.823	0.22	1.04e-44	5	ENSG00000128923	MINDY2	RGCs
1430	3.08e-32	0.672547	0.985	0.588	1.03e-27	5	ENSG00000183172	SMDT1	RGCs
1431	1.48e-90	0.671646	0.662	0.07	4.98e-86	5	ENSG00000106089	STX1A	RGCs
1432	1.13e-29	0.671363	0.923	0.478	3.78e-25	5	ENSG00000137100	DCTN3	RGCs
1433	1.81e-80	0.671252	0.738	0.107	6.06e-76	5	ENSG00000117461	PIK3R3	RGCs
1434	8.42e-59	0.670198	0.715	0.135	2.82e-54	5	ENSG00000075043	KCNQ2	RGCs
1435	2.65e-127	0.669952	0.631	0.036	8.89e-123	5	ENSG00000166501	PRKCB	RGCs
1436	1.75e-37	0.669441	0.838	0.277	5.87e-33	5	ENSG00000109911	ELP4	RGCs
1437	2.08e-34	0.665953	0.954	0.428	6.99e-30	5	ENSG00000105993	DNAJB6	RGCs
1438	5.23e-50	0.665793	0.831	0.229	1.76e-45	5	ENSG00000153395	LPCAT1	RGCs
1439	1.63e-69	0.665534	0.7	0.113	5.46e-65	5	ENSG00000125170	DOK4	RGCs
1440	1.14e-33	0.664377	0.923	0.407	3.81e-29	5	ENSG00000031698	SARS	RGCs
1441	3.19e-59	0.66334	0.792	0.182	1.07e-54	5	ENSG00000055163	CYFIP2	RGCs
1442	1.1e-26	0.663275	0.977	0.666	3.69e-22	5	ENSG00000108654	DDX5	RGCs
1443	7.75e-61	0.661481	0.777	0.165	2.6e-56	5	ENSG00000106537	TSPAN13	RGCs
1444	3.69e-59	0.661254	0.685	0.127	1.24e-54	5	ENSG00000121769	FABP3	RGCs
1445	3.2e-48	0.657282	0.762	0.185	1.07e-43	5	ENSG00000091972	CD200	RGCs
1446	5.99e-99	0.657122	0.631	0.055	2.01e-94	5	ENSG00000162873	KLHDC8A	RGCs
1447	2.22e-125	0.654656	0.731	0.055	7.46e-121	5	ENSG00000120251	GRIA2	RGCs
1448	8.43e-36	0.653366	0.938	0.425	2.83e-31	5	ENSG00000047849	MAP4	RGCs
1449	1.05e-48	0.652371	0.846	0.233	3.53e-44	5	ENSG00000109084	TMEM97	RGCs
1450	3.81e-29	0.652023	0.938	0.465	1.28e-24	5	ENSG00000145495	2006-03-01	RGCs
1451	4.94e-52	0.651895	0.7	0.155	1.66e-47	5	ENSG00000179361	ARID3B	RGCs
1452	2.5e-115	0.65108	0.592	0.036	8.37e-111	5	ENSG00000169258	GPRIN1	RGCs
1453	3.61e-50	0.650638	0.862	0.229	1.21e-45	5	ENSG00000134323	MYCN	RGCs
1454	1.73e-59	0.650572	0.723	0.149	5.8e-55	5	ENSG00000133878	DUSP26	RGCs
1455	3.27e-81	0.650463	0.646	0.077	1.1e-76	5	ENSG00000131242	RAB11FIP4	RGCs
1456	3.52e-39	0.650412	0.9	0.342	1.18e-34	5	ENSG00000141562	NARF	RGCs
1457	1.68e-27	0.649371	0.938	0.52	5.62e-23	5	ENSG00000184752	NDUFA12	RGCs
1458	2.3e-131	0.648742	0.615	0.031	7.72e-127	5	ENSG00000253457	SMIM18	RGCs
1459	1.06e-26	0.648742	1	0.788	3.55e-22	5	ENSG00000111775	COX6A1	RGCs
1460	3.77e-96	0.647685	0.715	0.078	1.27e-91	5	ENSG00000198794	SCAMP5	RGCs
1461	1.93e-41	0.647603	0.854	0.272	6.49e-37	5	ENSG00000156515	HK1	RGCs
1462	4.55e-59	0.64743	0.769	0.158	1.53e-54	5	ENSG00000184985	SORCS2	RGCs
1463	3.06e-28	0.646301	0.931	0.455	1.02e-23	5	ENSG00000131116	ZNF428	RGCs
1464	2.68e-44	0.646248	0.8	0.233	8.98e-40	5	ENSG00000173064	HECTD4	RGCs
1465	1.09e-86	0.645815	0.662	0.072	3.65e-82	5	ENSG00000136274	NACAD	RGCs
1466	3.93e-86	0.644992	0.669	0.077	1.32e-81	5	ENSG00000151490	PTPRO	RGCs
1467	1.04e-34	0.644951	0.885	0.342	3.49e-30	5	ENSG00000108840	HDAC5	RGCs
1468	7.81e-71	0.644864	0.754	0.128	2.62e-66	5	ENSG00000132563	REEP2	RGCs
1469	5.65e-26	0.644339	0.892	0.437	1.89e-21	5	ENSG00000100320	RBFOX2	RGCs
1470	1.68e-41	0.643841	0.715	0.186	5.63e-37	5	ENSG00000163516	ANKZF1	RGCs
1471	9.75e-42	0.642984	0.877	0.296	3.27e-37	5	ENSG00000138107	ACTR1A	RGCs
1472	4.14e-35	0.641561	0.908	0.377	1.39e-30	5	ENSG00000160310	PRMT2	RGCs
1473	8.28e-27	0.641383	0.931	0.488	2.78e-22	5	ENSG00000213585	VDAC1	RGCs
1474	5.71e-27	0.639818	0.892	0.414	1.92e-22	5	ENSG00000170043	TRAPPC1	RGCs
1475	2.97e-30	0.638845	0.792	0.309	9.97e-26	5	ENSG00000218336	TENM3	RGCs
1476	7.25e-60	0.63862	0.677	0.122	2.43e-55	5	ENSG00000020129	NCDN	RGCs
1477	2.46e-66	0.638407	0.7	0.114	8.24e-62	5	ENSG00000196557	CACNA1H	RGCs
1478	1.66e-43	0.638109	0.785	0.228	5.55e-39	5	ENSG00000215845	TSTD1	RGCs
1479	2.08e-95	0.638079	0.638	0.06	6.97e-91	5	ENSG00000173221	GLRX	RGCs
1480	7.18e-36	0.637275	0.877	0.334	2.41e-31	5	ENSG00000116871	MAP7D1	RGCs
1481	1.16e-54	0.637261	0.808	0.183	3.89e-50	5	ENSG00000245694	CRNDE	RGCs
1482	3.2e-114	0.636481	0.631	0.043	1.07e-109	5	ENSG00000155511	GRIA1	RGCs
1483	5.77e-43	0.634763	0.785	0.223	1.94e-38	5	ENSG00000178531	CTXN1	RGCs
1484	2.23e-87	0.634661	0.808	0.117	7.49e-83	5	ENSG00000174871	CNIH2	RGCs
1485	3.85e-68	0.634236	0.762	0.138	1.29e-63	5	ENSG00000152256	PDK1	RGCs
1486	2.87e-29	0.63386	0.938	0.517	9.61e-25	5	ENSG00000128989	ARPP19	RGCs
1487	1.84e-26	0.633135	0.915	0.475	6.17e-22	5	ENSG00000143256	PFDN2	RGCs
1488	3.66e-44	0.633098	0.762	0.213	1.23e-39	5	ENSG00000147155	EBP	RGCs
1489	5.41e-98	0.63307	0.631	0.056	1.82e-93	5	ENSG00000166206	GABRB3	RGCs
1490	4.34e-83	0.632883	0.6	0.063	1.46e-78	5	ENSG00000196353	CPNE4	RGCs
1491	3.82e-128	0.631319	0.585	0.028	1.28e-123	5	ENSG00000167281	RBFOX3	RGCs
1492	3.65e-43	0.631086	0.738	0.202	1.23e-38	5	ENSG00000172893	DHCR7	RGCs
1493	5.66e-62	0.630571	0.754	0.143	1.9e-57	5	ENSG00000134982	APC	RGCs
1494	6.98e-52	0.630471	0.762	0.181	2.34e-47	5	ENSG00000165233	CARD19	RGCs
1495	1.67e-36	0.629793	0.862	0.296	5.6e-32	5	ENSG00000188070	C11orf95	RGCs
1496	1.29e-27	0.62891	0.931	0.443	4.32e-23	5	ENSG00000167770	OTUB1	RGCs
1497	3.83e-40	0.627824	0.831	0.272	1.29e-35	5	ENSG00000010810	FYN	RGCs
1498	3.21e-65	0.627635	0.731	0.127	1.07e-60	5	ENSG00000070669	ASNS	RGCs
1499	5.19e-31	0.627406	0.838	0.358	1.74e-26	5	ENSG00000069329	VPS35	RGCs
1500	1.96e-40	0.627156	0.808	0.245	6.56e-36	5	ENSG00000070610	GBA2	RGCs
1501	7.43e-50	0.627072	0.723	0.173	2.49e-45	5	ENSG00000106665	CLIP2	RGCs
1502	5.9e-50	0.624664	0.738	0.176	1.98e-45	5	ENSG00000110514	MADD	RGCs
1503	2.25e-27	0.623442	0.992	0.77	7.54e-23	5	ENSG00000110321	EIF4G2	RGCs
1504	1.48e-55	0.623368	0.8	0.181	4.96e-51	5	ENSG00000138162	TACC2	RGCs
1505	7.48e-34	0.623028	0.869	0.333	2.51e-29	5	ENSG00000137312	FLOT1	RGCs
1506	3.94e-63	0.622784	0.731	0.13	1.32e-58	5	ENSG00000250510	GPR162	RGCs
1507	1.7e-160	0.622191	0.638	0.022	5.69e-156	5	ENSG00000141433	ADCYAP1	RGCs
1508	3.99e-43	0.621023	0.823	0.255	1.34e-38	5	ENSG00000163939	PBRM1	RGCs
1509	3.85e-29	0.620887	0.846	0.364	1.29e-24	5	ENSG00000178719	GRINA	RGCs
1510	1.93e-25	0.619982	0.954	0.554	6.48e-21	5	ENSG00000126457	PRMT1	RGCs
1511	2.64e-29	0.619834	0.946	0.526	8.84e-25	5	ENSG00000125971	DYNLRB1	RGCs
1512	1.59e-44	0.619537	0.731	0.19	5.32e-40	5	ENSG00000171617	ENC1	RGCs
1513	5.8e-143	0.618669	0.662	0.032	1.95e-138	5	ENSG00000101489	CELF4	RGCs
1514	2.71e-40	0.61866	0.831	0.255	9.1e-36	5	ENSG00000162032	SPSB3	RGCs
1515	5.89e-45	0.618458	0.8	0.223	1.98e-40	5	ENSG00000103160	HSDL1	RGCs
1516	7.37e-54	0.616933	0.792	0.18	2.47e-49	5	ENSG00000064999	ANKS1A	RGCs
1517	1.38e-29	0.616727	0.985	0.604	4.62e-25	5	ENSG00000143742	SRP9	RGCs
1518	9.07e-49	0.614912	0.723	0.166	3.04e-44	5	ENSG00000185189	NRBP2	RGCs
1519	3.73e-115	0.613982	0.615	0.039	1.25e-110	5	ENSG00000159784	FAM131B	RGCs
1520	1.71e-50	0.613382	0.762	0.176	5.72e-46	5	ENSG00000164683	HEY1	RGCs
1521	2.66e-40	0.613133	0.838	0.251	8.93e-36	5	ENSG00000165238	WNK2	RGCs
1522	9.84e-42	0.612051	0.746	0.193	3.3e-37	5	ENSG00000212694	LINC01089	RGCs
1523	1.36e-66	0.61201	0.723	0.127	4.57e-62	5	ENSG00000131089	ARHGEF9	RGCs
1524	1.56e-146	0.610719	0.654	0.03	5.22e-142	5	ENSG00000127585	FBXL16	RGCs
1525	2.57e-51	0.610214	0.785	0.191	8.63e-47	5	ENSG00000143862	ARL8A	RGCs
1526	4.23e-60	0.610038	0.838	0.183	1.42e-55	5	ENSG00000140022	STON2	RGCs
1527	3.26e-63	0.610029	0.708	0.127	1.09e-58	5	ENSG00000121653	MAPK8IP1	RGCs
1528	2.69e-23	0.609895	0.977	0.677	9.03e-19	5	ENSG00000179222	MAGED1	RGCs
1529	3.4e-69	0.609099	0.6	0.078	1.14e-64	5	ENSG00000176956	LY6H	RGCs
1530	2.14e-26	0.607932	0.923	0.472	7.17e-22	5	ENSG00000100442	FKBP3	RGCs
1531	2.32e-26	0.606976	0.962	0.514	7.78e-22	5	ENSG00000114784	EIF1B	RGCs
1532	2.76e-34	0.606239	0.777	0.261	9.26e-30	5	ENSG00000132471	WBP2	RGCs
1533	5.67e-23	0.605366	0.992	0.704	1.9e-18	5	ENSG00000110955	ATP5F1B	RGCs
1534	8.8e-27	0.604462	0.969	0.604	2.95e-22	5	ENSG00000158164	TMSB15A	RGCs
1535	9.49e-61	0.603907	0.785	0.149	3.18e-56	5	ENSG00000102678	FGF9	RGCs
1536	1.22e-21	0.603692	0.892	0.48	4.1e-17	5	ENSG00000109180	OCIAD1	RGCs
1537	3.73e-27	0.602112	0.908	0.393	1.25e-22	5	ENSG00000177383	MAGEF1	RGCs
1538	6.22e-54	0.601673	0.708	0.148	2.09e-49	5	ENSG00000095321	CRAT	RGCs
1539	9.36e-85	0.600763	0.662	0.074	3.14e-80	5	ENSG00000187323	DCC	RGCs
1540	1.37e-43	0.598695	0.831	0.253	4.6e-39	5	ENSG00000272325	NUDT3	RGCs
1541	6.37e-58	0.598602	0.808	0.158	2.14e-53	5	ENSG00000170893	TRH	RGCs
1542	1.44e-33	0.597694	0.808	0.264	4.82e-29	5	ENSG00000008710	PKD1	RGCs
1543	3.71e-84	0.597245	0.685	0.082	1.24e-79	5	ENSG00000143630	HCN3	RGCs
1544	1.11e-116	0.596845	0.592	0.035	3.73e-112	5	ENSG00000174460	ZCCHC12	RGCs
1545	1.09e-81	0.596665	0.677	0.083	3.66e-77	5	ENSG00000169213	RAB3B	RGCs
1546	1.24e-88	0.596112	0.585	0.054	4.17e-84	5	ENSG00000167702	KIFC2	RGCs
1547	1.4e-38	0.596039	0.769	0.221	4.71e-34	5	ENSG00000175265	GOLGA8A	RGCs
1548	6.56e-107	0.595769	0.5	0.025	2.2e-102	5	ENSG00000157103	SLC6A1	RGCs
1549	2.27e-31	0.595576	0.808	0.282	7.63e-27	5	ENSG00000130396	AFDN	RGCs
1550	1.99e-44	0.595574	0.731	0.182	6.67e-40	5	ENSG00000067836	ROGDI	RGCs
1551	8.19e-42	0.595014	0.831	0.255	2.75e-37	5	ENSG00000273841	TAF9	RGCs
1552	1.46e-25	0.594954	0.977	0.6	4.89e-21	5	ENSG00000124766	SOX4	RGCs
1553	1.81e-89	0.594554	0.662	0.069	6.07e-85	5	ENSG00000141668	CBLN2	RGCs
1554	9.24e-50	0.594411	0.762	0.177	3.1e-45	5	ENSG00000132510	KDM6B	RGCs
1555	1.14e-54	0.594319	0.731	0.15	3.83e-50	5	ENSG00000066735	KIF26A	RGCs
1556	4.24e-92	0.594214	0.685	0.071	1.42e-87	5	ENSG00000142549	IGLON5	RGCs
1557	6.64e-74	0.592609	0.677	0.094	2.23e-69	5	ENSG00000068366	ACSL4	RGCs
1558	2.51e-31	0.592158	1	0.621	8.42e-27	5	ENSG00000178741	COX5A	RGCs
1559	2.11e-99	0.591982	0.531	0.034	7.07e-95	5	ENSG00000171786	NHLH1	RGCs
1560	3.13e-27	0.591869	0.9	0.42	1.05e-22	5	ENSG00000152767	FARP1	RGCs
1561	4.7e-25	0.590468	0.877	0.401	1.58e-20	5	ENSG00000134686	PHC2	RGCs
1562	4.23e-34	0.589706	0.923	0.39	1.42e-29	5	ENSG00000134779	TPGS2	RGCs
1563	1.58e-53	0.589602	0.692	0.137	5.29e-49	5	ENSG00000177706	FAM20C	RGCs
1564	3.24e-21	0.589159	0.969	0.627	1.09e-16	5	ENSG00000204435	CSNK2B	RGCs
1565	2.01e-42	0.588608	0.823	0.256	6.73e-38	5	ENSG00000151729	SLC25A4	RGCs
1566	6.19e-67	0.588471	0.638	0.096	2.08e-62	5	ENSG00000167972	ABCA3	RGCs
1567	1.25e-135	0.58832	0.592	0.025	4.18e-131	5	ENSG00000091664	SLC17A6	RGCs
1568	2.45e-39	0.588278	0.862	0.308	8.21e-35	5	ENSG00000177885	GRB2	RGCs
1569	7.76e-47	0.587934	0.854	0.244	2.6e-42	5	ENSG00000100592	DAAM1	RGCs
1570	3.5e-36	0.587933	0.862	0.292	1.17e-31	5	ENSG00000100918	REC8	RGCs
1571	2.49e-39	0.587746	0.808	0.246	8.35e-35	5	ENSG00000109654	TRIM2	RGCs
1572	3.67e-70	0.586492	0.662	0.096	1.23e-65	5	ENSG00000162706	CADM3	RGCs
1573	1.97e-25	0.586428	1	0.72	6.62e-21	5	ENSG00000154723	ATP5PF	RGCs
1574	8.97e-41	0.586144	0.777	0.227	3.01e-36	5	ENSG00000094631	HDAC6	RGCs
1575	4.25e-76	0.58611	0.6	0.067	1.43e-71	5	ENSG00000141837	CACNA1A	RGCs
1576	1.34e-81	0.584744	0.662	0.08	4.5e-77	5	ENSG00000198513	ATL1	RGCs
1577	6.96e-26	0.584513	0.908	0.43	2.34e-21	5	ENSG00000137207	YIPF3	RGCs
1578	1.67e-19	0.58434	0.946	0.572	5.62e-15	5	ENSG00000129351	ILF3	RGCs
1579	2.78e-35	0.582921	0.877	0.323	9.32e-31	5	ENSG00000167470	MIDN	RGCs
1580	4.37e-142	0.582355	0.615	0.026	1.46e-137	5	ENSG00000091536	MYO15A	RGCs
1581	8.37e-30	0.582232	0.908	0.405	2.81e-25	5	ENSG00000113758	DBN1	RGCs
1582	3.6e-37	0.581636	0.746	0.213	1.21e-32	5	ENSG00000141258	SGSM2	RGCs
1583	5.46e-25	0.580149	0.962	0.567	1.83e-20	5	ENSG00000099977	DDT	RGCs
1584	1.86e-61	0.580092	0.685	0.117	6.25e-57	5	ENSG00000236502	SIX3-AS1	RGCs
1585	2.57e-45	0.579532	0.723	0.175	8.63e-41	5	ENSG00000156587	UBE2L6	RGCs
1586	1.13e-27	0.57878	0.885	0.348	3.8e-23	5	ENSG00000108465	CDK5RAP3	RGCs
1587	5.48e-38	0.578376	0.808	0.245	1.84e-33	5	ENSG00000126947	ARMCX1	RGCs
1588	6.09e-53	0.578111	0.815	0.198	2.04e-48	5	ENSG00000049759	NEDD4L	RGCs
1589	1.24e-38	0.577799	0.723	0.208	4.17e-34	5	ENSG00000138032	PPM1B	RGCs
1590	1.36e-92	0.577072	0.608	0.055	4.57e-88	5	ENSG00000166257	SCN3B	RGCs
1591	2.15e-27	0.576494	0.915	0.402	7.2e-23	5	ENSG00000071553	ATP6AP1	RGCs
1592	4e-50	0.576309	0.669	0.137	1.34e-45	5	ENSG00000114631	PODXL2	RGCs
1593	2.38e-26	0.576228	0.915	0.481	8e-22	5	ENSG00000120438	TCP1	RGCs
1594	4.63e-24	0.576068	0.869	0.417	1.55e-19	5	ENSG00000010322	NISCH	RGCs
1595	1.67e-22	0.575629	0.977	0.589	5.61e-18	5	ENSG00000151366	NDUFC2	RGCs
1596	4.9e-131	0.575603	0.592	0.027	1.64e-126	5	ENSG00000092051	JPH4	RGCs
1597	1.34e-33	0.575599	0.792	0.269	4.49e-29	5	ENSG00000182606	TRAK1	RGCs
1598	2.02e-76	0.575196	0.731	0.105	6.79e-72	5	ENSG00000184113	CLDN5	RGCs
1599	2.28e-69	0.574631	0.677	0.099	7.65e-65	5	ENSG00000167100	SAMD14	RGCs
1600	1.27e-62	0.574518	0.623	0.096	4.28e-58	5	ENSG00000068971	PPP2R5B	RGCs
1601	7.01e-36	0.574017	0.831	0.278	2.35e-31	5	ENSG00000176903	PNMA1	RGCs
1602	5.91e-35	0.573916	0.738	0.223	1.98e-30	5	ENSG00000178104	PDE4DIP	RGCs
1603	2.87e-62	0.573751	0.862	0.18	9.63e-58	5	ENSG00000162545	CAMK2N1	RGCs
1604	1.93e-23	0.573122	0.969	0.557	6.49e-19	5	ENSG00000168209	DDIT4	RGCs
1605	3.33e-24	0.572738	0.954	0.523	1.12e-19	5	ENSG00000188229	TUBB4B	RGCs
1606	2.07e-35	0.572397	0.8	0.255	6.93e-31	5	ENSG00000144567	RETREG2	RGCs
1607	3.07e-137	0.572358	0.577	0.022	1.03e-132	5	ENSG00000147432	CHRNB3	RGCs
1608	1.78e-28	0.571645	0.785	0.289	5.97e-24	5	ENSG00000164050	PLXNB1	RGCs
1609	7.61e-38	0.571552	0.823	0.273	2.55e-33	5	ENSG00000143702	CEP170	RGCs
1610	7.58e-36	0.571371	0.792	0.253	2.54e-31	5	ENSG00000136193	SCRN1	RGCs
1611	9.33e-96	0.569606	0.662	0.063	3.13e-91	5	ENSG00000146267	FAXC	RGCs
1612	1.08e-36	0.569323	0.785	0.254	3.63e-32	5	ENSG00000087470	DNM1L	RGCs
1613	6.5e-38	0.568486	0.792	0.249	2.18e-33	5	ENSG00000130559	CAMSAP1	RGCs
1614	3.44e-45	0.567435	0.792	0.199	1.15e-40	5	ENSG00000172932	ANKRD13D	RGCs
1615	9.35e-57	0.566838	0.592	0.096	3.14e-52	5	ENSG00000155256	ZFYVE27	RGCs
1616	3.04e-57	0.566821	0.646	0.112	1.02e-52	5	ENSG00000177508	IRX3	RGCs
1617	1.22e-44	0.566221	0.662	0.142	4.08e-40	5	ENSG00000151376	ME3	RGCs
1618	2e-25	0.565574	0.838	0.37	6.7e-21	5	ENSG00000080845	DLGAP4	RGCs
1619	1.64e-48	0.565567	0.685	0.146	5.5e-44	5	ENSG00000152377	SPOCK1	RGCs
1620	6.59e-64	0.565466	0.7	0.119	2.21e-59	5	ENSG00000146555	SDK1	RGCs
1621	1.11e-88	0.564233	0.654	0.069	3.72e-84	5	ENSG00000168243	GNG4	RGCs
1622	3.85e-56	0.564123	0.638	0.109	1.29e-51	5	ENSG00000152092	ASTN1	RGCs
1623	9.93e-102	0.563003	0.5	0.028	3.33e-97	5	ENSG00000165731	RET	RGCs
1624	1.87e-78	0.562937	0.631	0.072	6.28e-74	5	ENSG00000185985	SLITRK2	RGCs
1625	2.43e-21	0.562794	0.977	0.655	8.14e-17	5	ENSG00000126432	PRDX5	RGCs
1626	1.5e-133	0.562249	0.546	0.02	5.05e-129	5	ENSG00000150361	KLHL1	RGCs
1627	2.53e-75	0.561625	0.615	0.075	8.48e-71	5	ENSG00000076826	CAMSAP3	RGCs
1628	1.19e-52	0.561444	0.677	0.125	3.98e-48	5	ENSG00000260230	FRRS1L	RGCs
1629	1.16e-22	0.560523	0.923	0.58	3.88e-18	5	ENSG00000134590	RTL8C	RGCs
1630	5.74e-48	0.560243	0.685	0.147	1.93e-43	5	ENSG00000160145	KALRN	RGCs
1631	1.16e-56	0.560208	0.715	0.143	3.89e-52	5	ENSG00000130164	LDLR	RGCs
1632	2.5e-28	0.559217	0.8	0.312	8.39e-24	5	ENSG00000170899	GSTA4	RGCs
1633	9.11e-106	0.558201	0.515	0.028	3.06e-101	5	ENSG00000072182	ASIC4	RGCs
1634	1.17e-33	0.558045	0.862	0.3	3.93e-29	5	ENSG00000276644	DACH1	RGCs
1635	8.44e-87	0.557712	0.631	0.066	2.83e-82	5	ENSG00000185090	MANEAL	RGCs
1636	9.74e-79	0.557458	0.6	0.064	3.27e-74	5	ENSG00000108551	RASD1	RGCs
1637	7.33e-30	0.556951	0.892	0.37	2.46e-25	5	ENSG00000179364	PACS2	RGCs
1638	1.43e-52	0.555926	0.846	0.21	4.78e-48	5	ENSG00000128656	CHN1	RGCs
1639	1.55e-44	0.555823	0.685	0.157	5.18e-40	5	ENSG00000006652	IFRD1	RGCs
1640	3.69e-47	0.555534	0.662	0.14	1.24e-42	5	ENSG00000196208	GREB1	RGCs
1641	6.54e-30	0.554251	0.862	0.355	2.19e-25	5	ENSG00000204308	RNF5	RGCs
1642	2.4e-66	0.552931	0.685	0.107	8.04e-62	5	ENSG00000158292	GPR153	RGCs
1643	7.52e-56	0.552716	0.662	0.122	2.52e-51	5	ENSG00000198853	RUSC2	RGCs
1644	3.57e-34	0.552387	0.838	0.296	1.2e-29	5	ENSG00000095059	DHPS	RGCs
1645	8.17e-45	0.552193	0.738	0.187	2.74e-40	5	ENSG00000198646	NCOA6	RGCs
1646	2.69e-144	0.551673	0.577	0.019	9.03e-140	5	ENSG00000077080	ACTL6B	RGCs
1647	3.85e-34	0.551209	1	0.913	1.29e-29	5	ENSG00000163041	H3F3A	RGCs
1648	8.55e-133	0.550889	0.554	0.02	2.87e-128	5	ENSG00000125966	MMP24	RGCs
1649	4.49e-28	0.550456	0.877	0.376	1.51e-23	5	ENSG00000185236	RAB11B	RGCs
1650	1.32e-30	0.550318	0.854	0.308	4.43e-26	5	ENSG00000117569	PTBP2	RGCs
1651	3.81e-71	0.549016	0.569	0.067	1.28e-66	5	ENSG00000163462	TRIM46	RGCs
1652	1.33e-82	0.548413	0.615	0.065	4.45e-78	5	ENSG00000155974	GRIP1	RGCs
1653	5.28e-117	0.547794	0.546	0.027	1.77e-112	5	ENSG00000103723	AP3B2	RGCs
1654	7.97e-26	0.546832	0.831	0.36	2.67e-21	5	ENSG00000113575	PPP2CA	RGCs
1655	3.49e-150	0.54622	0.515	0.01	1.17e-145	5	ENSG00000101958	GLRA2	RGCs
1656	4.52e-38	0.546063	0.792	0.227	1.51e-33	5	ENSG00000135164	DMTF1	RGCs
1657	2.39e-67	0.545801	0.685	0.104	8e-63	5	ENSG00000157833	GAREM2	RGCs
1658	1.12e-38	0.54554	0.831	0.278	3.75e-34	5	ENSG00000141741	MIEN1	RGCs
1659	1.28e-23	0.545328	0.938	0.445	4.28e-19	5	ENSG00000100650	SRSF5	RGCs
1660	1.03e-79	0.545049	0.6	0.063	3.45e-75	5	ENSG00000122367	LDB3	RGCs
1661	5.91e-29	0.544257	0.831	0.32	1.98e-24	5	ENSG00000092096	SLC22A17	RGCs
1662	7.59e-71	0.544	0.685	0.096	2.55e-66	5	ENSG00000176842	IRX5	RGCs
1663	3.99e-63	0.543058	0.654	0.099	1.34e-58	5	ENSG00000184905	TCEAL2	RGCs
1664	1.64e-25	0.542934	0.908	0.409	5.49e-21	5	ENSG00000138760	SCARB2	RGCs
1665	1.73e-62	0.541838	0.777	0.149	5.82e-58	5	ENSG00000109339	MAPK10	RGCs
1666	1.65e-25	0.541478	0.985	0.589	5.52e-21	5	ENSG00000123562	MORF4L2	RGCs
1667	4.06e-17	0.541274	1	0.81	1.36e-12	5	ENSG00000122566	HNRNPA2B1	RGCs
1668	8.08e-98	0.541062	0.585	0.045	2.71e-93	5	ENSG00000104967	NOVA2	RGCs
1669	5.13e-50	0.540216	0.631	0.122	1.72e-45	5	ENSG00000074964	ARHGEF10L	RGCs
1670	1.44e-57	0.540207	0.762	0.152	4.84e-53	5	ENSG00000131437	KIF3A	RGCs
1671	6.5e-20	0.54016	0.946	0.5	2.18e-15	5	ENSG00000116001	TIA1	RGCs
1672	1.18e-106	0.539479	0.592	0.04	3.97e-102	5	ENSG00000183570	PCBP3	RGCs
1673	5.19e-27	0.539028	0.685	0.234	1.74e-22	5	ENSG00000138834	MAPK8IP3	RGCs
1674	6.19e-59	0.538272	0.746	0.145	2.08e-54	5	ENSG00000266074	BAHCC1	RGCs
1675	2.53e-131	0.538233	0.615	0.031	8.48e-127	5	ENSG00000106565	TMEM176B	RGCs
1676	1.33e-49	0.537025	0.785	0.179	4.44e-45	5	ENSG00000103154	NECAB2	RGCs
1677	1.32e-118	0.536796	0.7	0.052	4.42e-114	5	ENSG00000153253	SCN3A	RGCs
1678	2.84e-49	0.536617	0.769	0.181	9.52e-45	5	ENSG00000126217	MCF2L	RGCs
1679	5.87e-49	0.536464	0.631	0.128	1.97e-44	5	ENSG00000067606	PRKCZ	RGCs
1680	4.17e-57	0.535318	0.646	0.114	1.4e-52	5	ENSG00000143590	EFNA3	RGCs
1681	2.57e-59	0.533987	0.654	0.109	8.61e-55	5	ENSG00000215218	UBE2QL1	RGCs
1682	4.65e-19	0.5336	0.969	0.636	1.56e-14	5	ENSG00000134248	LAMTOR5	RGCs
1683	3.96e-35	0.533443	0.846	0.288	1.33e-30	5	ENSG00000232119	MCTS1	RGCs
1684	4.24e-54	0.533333	0.654	0.123	1.42e-49	5	ENSG00000110921	MVK	RGCs
1685	5.19e-22	0.533288	0.923	0.516	1.74e-17	5	ENSG00000198408	OGA	RGCs
1686	1.15e-32	0.5321	0.677	0.193	3.86e-28	5	ENSG00000169231	THBS3	RGCs
1687	1.21e-66	0.531216	0.646	0.096	4.04e-62	5	ENSG00000188130	MAPK12	RGCs
1688	1.56e-114	0.531129	0.631	0.042	5.24e-110	5	ENSG00000157168	NRG1	RGCs
1689	1.26e-48	0.53098	0.731	0.166	4.22e-44	5	ENSG00000146112	PPP1R18	RGCs
1690	8.14e-72	0.530917	0.6	0.071	2.73e-67	5	ENSG00000174672	BRSK2	RGCs
1691	1.81e-39	0.530854	0.8	0.24	6.06e-35	5	ENSG00000140836	ZFHX3	RGCs
1692	1.08e-58	0.530533	0.646	0.107	3.63e-54	5	ENSG00000138606	SHF	RGCs
1693	1.07e-31	0.530018	0.831	0.305	3.58e-27	5	ENSG00000006125	AP2B1	RGCs
1694	1.98e-41	0.529398	0.685	0.169	6.63e-37	5	ENSG00000167378	IRGQ	RGCs
1695	5.71e-21	0.529023	0.946	0.534	1.91e-16	5	ENSG00000243317	STMP1	RGCs
1696	1.63e-72	0.528786	0.808	0.142	5.47e-68	5	ENSG00000167771	RCOR2	RGCs
1697	1.52e-32	0.528695	0.854	0.293	5.11e-28	5	ENSG00000100445	SDR39U1	RGCs
1698	1.28e-111	0.528443	0.608	0.04	4.29e-107	5	ENSG00000172159	FRMD3	RGCs
1699	2.62e-25	0.527631	0.946	0.493	8.77e-21	5	ENSG00000077097	TOP2B	RGCs
1700	3.14e-65	0.527401	0.554	0.071	1.05e-60	5	ENSG00000164970	FAM219A	RGCs
1701	2.71e-25	0.526915	0.723	0.275	9.09e-21	5	ENSG00000079432	CIC	RGCs
1702	1.76e-49	0.526229	0.669	0.139	5.9e-45	5	ENSG00000005801	ZNF195	RGCs
1703	6.86e-22	0.525772	1	0.757	2.3e-17	5	ENSG00000152795	HNRNPDL	RGCs
1704	9.73e-30	0.52551	0.785	0.262	3.26e-25	5	ENSG00000099331	MYO9B	RGCs
1705	7.75e-53	0.524996	0.654	0.121	2.6e-48	5	ENSG00000088854	C20orf194	RGCs
1706	6.22e-65	0.5239	0.592	0.08	2.08e-60	5	ENSG00000175175	PPM1E	RGCs
1707	1.86e-59	0.523437	0.615	0.1	6.24e-55	5	ENSG00000175093	SPSB4	RGCs
1708	8.65e-29	0.523136	0.908	0.36	2.9e-24	5	ENSG00000099284	H2AFY2	RGCs
1709	2.71e-107	0.522962	0.562	0.035	9.09e-103	5	ENSG00000183775	KCTD16	RGCs
1710	1.4e-14	0.522829	0.938	0.548	4.68e-10	5	ENSG00000167088	SNRPD1	RGCs
1711	1.42e-117	0.52198	0.562	0.028	4.75e-113	5	ENSG00000169432	SCN9A	RGCs
1712	2.77e-80	0.521497	0.7	0.091	9.28e-76	5	ENSG00000033327	GAB2	RGCs
1713	9.36e-74	0.521433	0.677	0.092	3.14e-69	5	ENSG00000125814	NAPB	RGCs
1714	4.38e-49	0.520737	0.638	0.13	1.47e-44	5	ENSG00000005249	PRKAR2B	RGCs
1715	2.25e-25	0.520698	0.923	0.448	7.53e-21	5	ENSG00000127445	PIN1	RGCs
1716	5.37e-98	0.520187	0.6	0.048	1.8e-93	5	ENSG00000167861	HID1	RGCs
1717	1.1e-27	0.520171	1	0.768	3.67e-23	5	ENSG00000108953	YWHAE	RGCs
1718	2.79e-31	0.519919	0.731	0.234	9.36e-27	5	ENSG00000149809	TM7SF2	RGCs
1719	5.3e-42	0.519846	0.692	0.17	1.78e-37	5	ENSG00000104427	ZC2HC1A	RGCs
1720	5.29e-44	0.518569	0.715	0.178	1.77e-39	5	ENSG00000122873	CISD1	RGCs
1721	7.84e-55	0.518563	0.715	0.144	2.63e-50	5	ENSG00000168772	CXXC4	RGCs
1722	6.66e-100	0.518478	0.554	0.038	2.23e-95	5	ENSG00000154928	EPHB1	RGCs
1723	1.63e-21	0.518272	0.938	0.554	5.48e-17	5	ENSG00000140990	NDUFB10	RGCs
1724	7.37e-35	0.518187	0.854	0.299	2.47e-30	5	ENSG00000131100	ATP6V1E1	RGCs
1725	7.6e-82	0.517381	0.631	0.07	2.55e-77	5	ENSG00000160469	BRSK1	RGCs
1726	1.46e-138	0.517165	0.592	0.023	4.9e-134	5	ENSG00000174521	TTC9B	RGCs
1727	7.18e-51	0.516752	0.608	0.111	2.41e-46	5	ENSG00000247095	MIR210HG	RGCs
1728	5.37e-36	0.5165	0.769	0.232	1.8e-31	5	ENSG00000169018	FEM1B	RGCs
1729	1.58e-84	0.515856	0.592	0.058	5.31e-80	5	ENSG00000184545	DUSP8	RGCs
1730	3.53e-19	0.515044	0.877	0.47	1.18e-14	5	ENSG00000087274	ADD1	RGCs
1731	1.94e-100	0.5147	0.515	0.03	6.5e-96	5	ENSG00000152784	PRDM8	RGCs
1732	2.22e-51	0.514605	0.754	0.167	7.45e-47	5	ENSG00000068615	REEP1	RGCs
1733	7.22e-37	0.5146	0.862	0.293	2.42e-32	5	ENSG00000171316	CHD7	RGCs
1734	5.76e-17	0.513983	0.992	0.743	1.93e-12	5	ENSG00000164032	H2AFZ	RGCs
1735	7.2e-54	0.513728	0.692	0.133	2.41e-49	5	ENSG00000119865	CNRIP1	RGCs
1736	7.69e-34	0.513677	0.7	0.214	2.58e-29	5	ENSG00000072042	RDH11	RGCs
1737	1.38e-42	0.512656	0.715	0.185	4.63e-38	5	ENSG00000165943	MOAP1	RGCs
1738	1.69e-43	0.51022	0.677	0.157	5.65e-39	5	ENSG00000083290	ULK2	RGCs
1739	3.93e-40	0.510095	0.777	0.218	1.32e-35	5	ENSG00000171206	TRIM8	RGCs
1740	1.08e-38	0.510038	0.738	0.2	3.63e-34	5	ENSG00000134369	NAV1	RGCs
1741	1.19e-18	0.509963	0.985	0.757	3.98e-14	5	ENSG00000132432	SEC61G	RGCs
1742	5.79e-50	0.509624	0.638	0.122	1.94e-45	5	ENSG00000137872	SEMA6D	RGCs
1743	1.37e-34	0.508637	0.769	0.249	4.59e-30	5	ENSG00000010404	IDS	RGCs
1744	1.54e-61	0.508623	0.692	0.111	5.15e-57	5	ENSG00000119547	ONECUT2	RGCs
1745	3.97e-107	0.508554	0.546	0.032	1.33e-102	5	ENSG00000161082	CELF5	RGCs
1746	1.95e-75	0.50796	0.492	0.042	6.55e-71	5	ENSG00000275180	AC048341.2	RGCs
1747	2.19e-40	0.507557	0.808	0.225	7.34e-36	5	ENSG00000091129	NRCAM	RGCs
1748	8.89e-26	0.50629	0.915	0.384	2.98e-21	5	ENSG00000101198	NKAIN4	RGCs
1749	3.73e-32	0.505235	0.754	0.246	1.25e-27	5	ENSG00000109919	MTCH2	RGCs
1750	3.32e-55	0.505098	0.677	0.123	1.11e-50	5	ENSG00000178662	CSRNP3	RGCs
1751	6.17e-42	0.504575	0.7	0.175	2.07e-37	5	ENSG00000153815	CMIP	RGCs
1752	7.76e-20	0.504431	0.946	0.49	2.6e-15	5	ENSG00000049449	RCN1	RGCs
1753	2.02e-19	0.504319	1	0.703	6.78e-15	5	ENSG00000132341	RAN	RGCs
1754	3.03e-23	0.504231	0.831	0.408	1.02e-18	5	ENSG00000198937	CCDC167	RGCs
1755	1.13e-21	0.503658	0.938	0.497	3.78e-17	5	ENSG00000203667	COX20	RGCs
1756	2.74e-46	0.50316	0.692	0.152	9.18e-42	5	ENSG00000166402	TUB	RGCs
1757	1.58e-96	0.503068	0.523	0.034	5.29e-92	5	ENSG00000087495	PHACTR3	RGCs
1758	2.05e-51	0.502718	0.769	0.182	6.89e-47	5	ENSG00000139116	KIF21A	RGCs
1759	1.22e-33	0.502191	0.792	0.267	4.1e-29	5	ENSG00000176973	FAM89B	RGCs
1760	4.52e-30	0.501963	0.885	0.363	1.52e-25	5	ENSG00000149485	FADS1	RGCs
1761	5.54e-79	0.501627	0.523	0.048	1.86e-74	5	ENSG00000137094	DNAJB5	RGCs
1762	2e-35	0.500544	0.731	0.215	6.7e-31	5	ENSG00000082701	GSK3B	RGCs
1763	1e-47	0.500394	0.623	0.12	3.36e-43	5	ENSG00000169169	CPT1C	RGCs
1764	1.33e-34	2.19484	0.943	0.813	4.48e-30	6	ENSG00000188536	HBA2	red blood cells
1765	4.28e-28	2.01892	0.862	0.644	1.44e-23	6	ENSG00000206172	HBA1	red blood cells
1766	1.18e-29	1.97252	0.951	0.866	3.97e-25	6	ENSG00000196565	HBG2	red blood cells
1767	4.5e-15	1.83505	0.472	0.237	1.51e-10	6	ENSG00000175899	A2M	red blood cells
1768	1.42e-08	1.7501	0.48	0.334	0.000474942	6	ENSG00000244734	HBB	red blood cells
1769	2.73e-12	1.73456	0.512	0.311	9.17e-08	6	ENSG00000163453	IGFBP7	red blood cells
1770	2.61e-37	1.56836	0.959	0.75	8.76e-33	6	ENSG00000269028	MTRNR2L12	red blood cells
1771	1.41e-35	1.45618	0.902	0.488	4.72e-31	6	ENSG00000100053	CRYBB3	red blood cells
1772	2.5e-09	1.4118	0.65	0.564	8.39e-05	6	ENSG00000213934	HBG1	red blood cells
1773	4.54e-34	1.39318	0.87	0.442	1.52e-29	6	ENSG00000145692	BHMT	red blood cells
1774	2.7e-12	1.34247	0.26	0.084	9.06e-08	6	ENSG00000125810	CD93	red blood cells
1775	3.07e-08	1.28843	0.301	0.148	0.00102989	6	ENSG00000106991	ENG	red blood cells
1776	2.32e-05	1.23916	0.236	0.125	0.77681	6	ENSG00000146674	IGFBP3	red blood cells
1777	3.09e-08	1.2067	0.325	0.169	0.00103603	6	ENSG00000004399	PLXND1	red blood cells
1778	9.76e-24	1.18952	0.61	0.223	3.27e-19	6	ENSG00000105370	LIM2	red blood cells
1779	2.65e-31	1.18623	0.935	0.696	8.88e-27	6	ENSG00000109846	CRYAB	red blood cells
1780	0.00128513	1.17735	0.252	0.169	1	6	ENSG00000154856	APCDD1	red blood cells
1781	5.13e-10	1.1605	0.585	0.401	1.72e-05	6	ENSG00000196154	S100A4	red blood cells
1782	4.25e-06	1.13847	0.317	0.185	0.142611	6	ENSG00000118523	CTGF	red blood cells
1783	1.5e-12	1.13212	0.545	0.28	5.02e-08	6	ENSG00000165092	ALDH1A1	red blood cells
1784	1.31e-08	1.10771	0.236	0.092	0.000438689	6	ENSG00000168497	CAVIN2	red blood cells
1785	0.00408857	1.09749	0.488	0.513	1	6	ENSG00000187498	COL4A1	red blood cells
1786	2.73e-30	1.03403	0.976	0.965	9.15e-26	6	ENSG00000198886	MT-ND4	red blood cells
1787	2.39e-11	1.03025	0.236	0.074	8.01e-07	6	ENSG00000213949	ITGA1	red blood cells
1788	4.65e-05	1.02788	0.553	0.538	1	6	ENSG00000134871	COL4A2	red blood cells
1789	1e-07	1.01512	0.211	0.082	0.00336361	6	ENSG00000179776	CDH5	red blood cells
1790	1.25e-34	1.00925	0.951	0.665	4.18e-30	6	ENSG00000108255	CRYBA1	red blood cells
1791	0.00311433	1.00052	0.317	0.244	1	6	ENSG00000101384	JAG1	red blood cells
1792	8.89e-05	0.998867	0.423	0.322	1	6	ENSG00000130656	HBZ	red blood cells
1793	5.19e-05	0.990646	0.154	0.066	1	6	ENSG00000161381	PLXDC1	red blood cells
1794	1.62e-09	0.964963	0.268	0.108	5.44e-05	6	ENSG00000143248	RGS5	red blood cells
1795	5.53e-36	0.961809	0.992	0.974	1.85e-31	6	ENSG00000198712	MT-CO2	red blood cells
1796	8.83e-10	0.928945	0.228	0.077	2.96e-05	6	ENSG00000116016	EPAS1	red blood cells
1797	1.25e-34	0.924941	0.935	0.569	4.2e-30	6	ENSG00000196431	CRYBA4	red blood cells
1798	6.06e-05	0.924354	0.171	0.077	1	6	ENSG00000102760	RGCC	red blood cells
1799	9.35e-10	0.90757	0.268	0.104	3.14e-05	6	ENSG00000149564	ESAM	red blood cells
1800	3.5e-35	0.903047	0.959	0.668	1.17e-30	6	ENSG00000100122	CRYBB1	red blood cells
1801	0.000545908	0.889443	0.341	0.25	1	6	ENSG00000228253	MT-ATP8	red blood cells
1802	0.00408044	0.887165	0.211	0.134	1	6	ENSG00000117707	PROX1	red blood cells
1803	1.12e-28	0.885772	0.87	0.512	3.75e-24	6	ENSG00000213139	CRYGS	red blood cells
1804	5.84e-11	0.84513	0.211	0.063	1.96e-06	6	ENSG00000145681	HAPLN1	red blood cells
1805	0.00410069	0.842151	0.203	0.134	1	6	ENSG00000128567	PODXL	red blood cells
1806	2.73e-29	0.835113	0.894	0.622	9.15e-25	6	ENSG00000244752	CRYBB2	red blood cells
1807	0.00152172	0.834624	0.187	0.107	1	6	ENSG00000104267	CA2	red blood cells
1808	3.56e-11	0.827032	0.203	0.058	1.19e-06	6	ENSG00000222041	CYTOR	red blood cells
1809	1.16e-10	0.820073	0.211	0.063	3.89e-06	6	ENSG00000102755	FLT1	red blood cells
1810	0.00953194	0.819733	0.431	0.401	1	6	ENSG00000124570	SERPINB6	red blood cells
1811	4.11e-10	0.799489	0.764	0.636	1.38e-05	6	ENSG00000197943	PLCG2	red blood cells
1812	1.28e-25	0.798602	0.984	0.971	4.29e-21	6	ENSG00000198804	MT-CO1	red blood cells
1813	1.99e-05	0.785146	0.724	0.771	0.666718	6	ENSG00000106211	HSPB1	red blood cells
1814	2.02e-05	0.78116	0.228	0.116	0.678471	6	ENSG00000130300	PLVAP	red blood cells
1815	5.94e-08	0.777725	0.154	0.046	0.00199201	6	ENSG00000176907	TCIM	red blood cells
1816	1.99e-27	0.777692	0.984	0.983	6.67e-23	6	ENSG00000198938	MT-CO3	red blood cells
1817	0.000277781	0.765012	0.407	0.32	1	6	ENSG00000255823	MTRNR2L8	red blood cells
1818	1.68e-08	0.752168	0.764	0.784	0.000564401	6	ENSG00000198763	MT-ND2	red blood cells
1819	0.00152004	0.749721	0.187	0.108	1	6	ENSG00000134954	ETS1	red blood cells
1820	0.00227832	0.748975	0.252	0.154	1	6	ENSG00000135517	MIP	red blood cells
1821	0.000356014	0.748835	0.439	0.368	1	6	ENSG00000256618	MTRNR2L1	red blood cells
1822	3.2e-20	0.734266	0.984	0.974	1.07e-15	6	ENSG00000198899	MT-ATP6	red blood cells
1823	0.00331366	0.72666	0.203	0.127	1	6	ENSG00000111057	KRT18	red blood cells
1824	1.91e-14	0.718427	0.171	0.032	6.41e-10	6	ENSG00000069122	ADGRF5	red blood cells
1825	8.98e-07	0.708554	0.122	0.035	0.0301063	6	ENSG00000154133	ROBO4	red blood cells
1826	4.15e-07	0.700345	0.163	0.056	0.0139071	6	ENSG00000066056	TIE1	red blood cells
1827	0.000426268	0.693797	0.203	0.109	1	6	ENSG00000186790	FOXE3	red blood cells
1828	8.25e-05	0.693639	0.114	0.041	1	6	ENSG00000187513	GJA4	red blood cells
1829	0.000118518	0.689829	0.211	0.111	1	6	ENSG00000129538	RNASE1	red blood cells
1830	6.54e-28	0.686497	0.829	0.43	2.19e-23	6	ENSG00000163499	CRYBA2	red blood cells
1831	3.49e-05	0.668172	0.171	0.073	1	6	ENSG00000158578	ALAS2	red blood cells
1832	0.000526378	0.660658	0.366	0.274	1	6	ENSG00000197061	HIST1H4C	red blood cells
1833	1.19e-23	0.649963	0.829	0.545	3.98e-19	6	ENSG00000118231	CRYGD	red blood cells
1834	0.000255846	0.649544	0.171	0.084	1	6	ENSG00000123358	NR4A1	red blood cells
1835	0.00510699	0.64036	0.211	0.142	1	6	ENSG00000139318	DUSP6	red blood cells
1836	0.000215896	0.637276	0.585	0.566	1	6	ENSG00000152661	GJA1	red blood cells
1837	4.55e-05	0.634535	0.154	0.064	1	6	ENSG00000261371	PECAM1	red blood cells
1838	0.000533998	0.632153	0.146	0.069	1	6	ENSG00000131634	TMEM204	red blood cells
1839	0.00186758	0.614491	0.163	0.089	1	6	ENSG00000151468	CCDC3	red blood cells
1840	0.000168481	0.614304	0.276	0.151	1	6	ENSG00000257345	LINC02413	red blood cells
1841	0.000457025	0.591418	0.642	0.757	1	6	ENSG00000176340	COX8A	red blood cells
1842	0.00534812	0.589729	0.65	0.681	1	6	ENSG00000117394	SLC2A1	red blood cells
1843	0.00421124	0.585717	0.187	0.111	1	6	ENSG00000182853	VMO1	red blood cells
1844	1.75e-05	0.579263	0.122	0.041	0.586566	6	ENSG00000111252	SH2B3	red blood cells
1845	1.19e-14	0.578905	0.967	0.966	3.98e-10	6	ENSG00000198840	MT-ND3	red blood cells
1846	8.44e-27	0.572872	0.837	0.451	2.83e-22	6	ENSG00000163254	CRYGC	red blood cells
1847	0.00559765	0.569156	0.179	0.111	1	6	ENSG00000111348	ARHGDIB	red blood cells
1848	0.00308273	0.565296	0.301	0.219	1	6	ENSG00000213931	HBE1	red blood cells
1849	0.00930602	0.548213	0.171	0.107	1	6	ENSG00000178878	APOLD1	red blood cells
1850	5.85e-05	0.546087	0.122	0.044	1	6	ENSG00000185633	NDUFA4L2	red blood cells
1851	6.12e-13	0.544533	0.935	0.955	2.05e-08	6	ENSG00000198727	MT-CYB	red blood cells
1852	0.000615	0.541366	0.138	0.063	1	6	ENSG00000120738	EGR1	red blood cells
1853	0.000321436	0.512781	0.114	0.044	1	6	ENSG00000173269	MMRN2	red blood cells
1854	0.00956716	0.51001	0.122	0.066	1	6	ENSG00000107731	UNC5B	red blood cells
1855	0.00170347	0.500888	0.13	0.062	1	6	ENSG00000037280	FLT4	red blood cells
1856	2.13e-26	2.72885	0.684	0.304	7.14e-22	7	ENSG00000130656	HBZ	RPE
1857	1.19e-32	2.26585	0.624	0.197	3.98e-28	7	ENSG00000213931	HBE1	RPE
1858	1.08e-35	2.18712	0.932	0.545	3.63e-31	7	ENSG00000213934	HBG1	RPE
1859	5.32e-32	1.9877	0.991	0.864	1.78e-27	7	ENSG00000196565	HBG2	RPE
1860	9.67e-77	1.95456	0.735	0.126	3.24e-72	7	ENSG00000188505	NCCRP1	RPE
1861	1.34e-28	1.94581	0.932	0.64	4.5e-24	7	ENSG00000206172	HBA1	RPE
1862	1.07e-39	1.77642	0.838	0.402	3.57e-35	7	ENSG00000132386	SERPINF1	RPE
1863	7.92e-55	1.77385	0.65	0.136	2.66e-50	7	ENSG00000134160	TRPM1	RPE
1864	1.95e-50	1.75613	0.949	0.445	6.53e-46	7	ENSG00000185664	PMEL	RPE
1865	3.13e-49	1.67467	0.778	0.21	1.05e-44	7	ENSG00000109193	SULT1E1	RPE
1866	3.34e-24	1.66643	0.966	0.812	1.12e-19	7	ENSG00000188536	HBA2	RPE
1867	2.21e-48	1.56257	0.752	0.233	7.41e-44	7	ENSG00000162998	FRZB	RPE
1868	1.08e-48	1.5615	0.761	0.24	3.64e-44	7	ENSG00000104332	SFRP1	RPE
1869	2.21e-45	1.53874	0.641	0.158	7.42e-41	7	ENSG00000107165	TYRP1	RPE
1870	3.58e-26	1.53741	0.718	0.317	1.2e-21	7	ENSG00000244734	HBB	RPE
1871	1.58e-40	1.48105	0.632	0.178	5.3e-36	7	ENSG00000165588	OTX2	RPE
1872	7.57e-44	1.47474	0.803	0.285	2.54e-39	7	ENSG00000183036	PCP4	RPE
1873	1.09e-32	1.44847	0.838	0.532	3.64e-28	7	ENSG00000006042	TMEM98	RPE
1874	6.79e-40	1.40349	0.778	0.31	2.28e-35	7	ENSG00000138448	ITGAV	RPE
1875	6.46e-56	1.37409	0.598	0.109	2.17e-51	7	ENSG00000177133	LINC00982	RPE
1876	2.92e-34	1.35843	0.752	0.325	9.8e-30	7	ENSG00000129596	CDO1	RPE
1877	6.24e-68	1.27047	0.496	0.053	2.09e-63	7	ENSG00000120057	SFRP5	RPE
1878	1.57e-30	1.26241	0.761	0.314	5.28e-26	7	ENSG00000083067	TRPM3	RPE
1879	2.57e-36	1.19767	0.709	0.244	8.62e-32	7	ENSG00000172889	EGFL7	RPE
1880	5.31e-30	1.17635	0.957	0.665	1.78e-25	7	ENSG00000117318	ID3	RPE
1881	1.09e-25	1.17474	0.735	0.364	3.66e-21	7	ENSG00000100234	TIMP3	RPE
1882	6.61e-11	1.16288	0.444	0.202	2.22e-06	7	ENSG00000181195	PENK	RPE
1883	2.2e-46	1.12984	0.581	0.121	7.39e-42	7	ENSG00000124920	MYRF	RPE
1884	9.93e-35	1.1265	0.803	0.336	3.33e-30	7	ENSG00000080166	DCT	RPE
1885	3.47e-27	1.06311	0.376	0.082	1.16e-22	7	ENSG00000206177	HBM	RPE
1886	6.04e-29	1.04065	0.957	0.608	2.02e-24	7	ENSG00000115461	IGFBP5	RPE
1887	3.04e-41	1.02522	0.436	0.07	1.02e-36	7	ENSG00000107317	PTGDS	RPE
1888	3.92e-19	1.01807	0.855	0.655	1.32e-14	7	ENSG00000101439	CST3	RPE
1889	1.84e-25	1.00674	0.564	0.2	6.17e-21	7	ENSG00000147454	SLC25A37	RPE
1890	5.99e-27	0.990869	0.667	0.252	2.01e-22	7	ENSG00000180730	SHISA2	RPE
1891	1.26e-18	0.988439	0.504	0.195	4.23e-14	7	ENSG00000112699	GMDS	RPE
1892	9.26e-72	0.961373	0.444	0.036	3.11e-67	7	ENSG00000159212	CLIC6	RPE
1893	8.13e-26	0.944348	0.65	0.236	2.73e-21	7	ENSG00000184254	ALDH1A3	RPE
1894	9.22e-24	0.941966	0.889	0.548	3.09e-19	7	ENSG00000204389	HSPA1A	RPE
1895	1.58e-28	0.925862	0.607	0.199	5.29e-24	7	ENSG00000068078	FGFR3	RPE
1896	1.42e-36	0.915235	0.504	0.111	4.77e-32	7	ENSG00000136960	ENPP2	RPE
1897	1.73e-21	0.901845	0.906	0.663	5.81e-17	7	ENSG00000117394	SLC2A1	RPE
1898	1.8e-20	0.891299	0.615	0.256	6.05e-16	7	ENSG00000162496	DHRS3	RPE
1899	2.34e-22	0.873251	0.795	0.402	7.84e-18	7	ENSG00000049540	ELN	RPE
1900	1.01e-18	0.860708	0.744	0.446	3.38e-14	7	ENSG00000105655	ISYNA1	RPE
1901	3.55e-64	0.854312	0.436	0.041	1.19e-59	7	ENSG00000100156	SLC16A8	RPE
1902	3.31e-25	0.842703	0.573	0.198	1.11e-20	7	ENSG00000086696	HSD17B2	RPE
1903	3.84e-17	0.842692	0.855	0.567	1.29e-12	7	ENSG00000142192	APP	RPE
1904	1.27e-19	0.828216	0.846	0.54	4.25e-15	7	ENSG00000166710	B2M	RPE
1905	1.06e-15	0.824106	0.65	0.365	3.54e-11	7	ENSG00000131477	RAMP2	RPE
1906	1.65e-32	0.810186	0.504	0.122	5.52e-28	7	ENSG00000170421	KRT8	RPE
1907	1.66e-19	0.800572	0.342	0.089	5.57e-15	7	ENSG00000169877	AHSP	RPE
1908	6.38e-33	0.789212	0.462	0.1	2.14e-28	7	ENSG00000130300	PLVAP	RPE
1909	7.46e-17	0.786779	0.974	0.73	2.5e-12	7	ENSG00000166165	CKB	RPE
1910	3.23e-19	0.780653	0.692	0.31	1.08e-14	7	ENSG00000113721	PDGFRB	RPE
1911	8.69e-36	0.779909	0.325	0.043	2.92e-31	7	ENSG00000144810	COL8A1	RPE
1912	1.39e-23	0.779405	0.402	0.099	4.66e-19	7	ENSG00000137273	FOXF2	RPE
1913	3.69e-14	0.77074	0.556	0.262	1.24e-09	7	ENSG00000163251	FZD5	RPE
1914	4.62e-19	0.766869	0.59	0.262	1.55e-14	7	ENSG00000250722	SELENOP	RPE
1915	2.45e-20	0.76677	0.521	0.2	8.2e-16	7	ENSG00000103064	SLC7A6	RPE
1916	2.28e-16	0.765926	0.53	0.238	7.66e-12	7	ENSG00000106538	RARRES2	RPE
1917	1.52e-34	0.754709	0.436	0.084	5.09e-30	7	ENSG00000157873	TNFRSF14	RPE
1918	3.23e-37	0.740303	0.547	0.116	1.08e-32	7	ENSG00000077498	TYR	RPE
1919	5.45e-17	0.732029	0.513	0.215	1.83e-12	7	ENSG00000130203	APOE	RPE
1920	6.92e-24	0.728537	0.957	0.756	2.32e-19	7	ENSG00000136156	ITM2B	RPE
1921	4.84e-16	0.728192	0.957	0.8	1.62e-11	7	ENSG00000114115	RBP1	RPE
1922	6.51e-22	0.727019	0.188	0.023	2.18e-17	7	ENSG00000125144	MT1G	RPE
1923	1.82e-14	0.721883	0.573	0.295	6.12e-10	7	ENSG00000148400	NOTCH1	RPE
1924	4.56e-28	0.721186	0.41	0.094	1.53e-23	7	ENSG00000171724	VAT1L	RPE
1925	8.35e-15	0.721026	0.735	0.476	2.8e-10	7	ENSG00000119655	NPC2	RPE
1926	2.13e-11	0.718115	0.632	0.403	7.15e-07	7	ENSG00000185201	IFITM2	RPE
1927	4.96e-19	0.715967	0.957	0.794	1.66e-14	7	ENSG00000084207	GSTP1	RPE
1928	6.01e-18	0.698731	0.462	0.16	2.01e-13	7	ENSG00000004399	PLXND1	RPE
1929	1.86e-15	0.69864	0.803	0.513	6.25e-11	7	ENSG00000149212	SESN3	RPE
1930	1.01e-13	0.694664	0.598	0.341	3.38e-09	7	ENSG00000112715	VEGFA	RPE
1931	3.33e-16	0.693787	0.504	0.2	1.12e-11	7	ENSG00000125398	SOX9	RPE
1932	4.1e-17	0.690289	0.368	0.112	1.37e-12	7	ENSG00000145824	CXCL14	RPE
1933	4.12e-14	0.69003	0.641	0.375	1.38e-09	7	ENSG00000143153	ATP1B1	RPE
1934	2.89e-25	0.686712	0.41	0.104	9.71e-21	7	ENSG00000132376	INPP5K	RPE
1935	3.09e-24	0.674108	0.427	0.112	1.03e-19	7	ENSG00000111057	KRT18	RPE
1936	3.35e-19	0.670678	0.47	0.16	1.12e-14	7	ENSG00000103257	SLC7A5	RPE
1937	1.79e-13	0.668142	0.368	0.132	6.01e-09	7	ENSG00000124205	EDN3	RPE
1938	6.67e-12	0.667678	0.41	0.179	2.24e-07	7	ENSG00000065054	SLC9A3R2	RPE
1939	4.54e-17	0.66626	0.359	0.105	1.52e-12	7	ENSG00000044524	EPHA3	RPE
1940	3.89e-13	0.664776	0.598	0.323	1.3e-08	7	ENSG00000259439	LINC01833	RPE
1941	2.82e-14	0.661315	0.838	0.605	9.44e-10	7	ENSG00000152518	ZFP36L2	RPE
1942	1.27e-18	0.660642	0.932	0.642	4.27e-14	7	ENSG00000142089	IFITM3	RPE
1943	4.38e-25	0.660218	0.393	0.091	1.47e-20	7	ENSG00000178878	APOLD1	RPE
1944	2.87e-12	0.658485	0.521	0.259	9.61e-08	7	ENSG00000265972	TXNIP	RPE
1945	4.14e-30	0.658103	0.35	0.063	1.39e-25	7	ENSG00000188687	SLC4A5	RPE
1946	4.06e-14	0.653048	0.521	0.262	1.36e-09	7	ENSG00000171867	PRNP	RPE
1947	8.6e-24	0.648375	0.402	0.1	2.88e-19	7	ENSG00000234745	HLA-B	RPE
1948	5.69e-13	0.642313	0.103	0.012	1.91e-08	7	ENSG00000163737	PF4	RPE
1949	2.73e-24	0.63643	0.419	0.1	9.15e-20	7	ENSG00000169507	SLC38A11	RPE
1950	1.38e-11	0.62517	0.496	0.262	4.64e-07	7	ENSG00000164889	SLC4A2	RPE
1951	2.47e-19	0.621385	0.35	0.091	8.29e-15	7	ENSG00000164161	HHIP	RPE
1952	1.39e-19	0.620907	0.974	0.82	4.65e-15	7	ENSG00000198830	HMGN2	RPE
1953	2.92e-16	0.619355	0.376	0.118	9.78e-12	7	ENSG00000136160	EDNRB	RPE
1954	9.16e-16	0.617079	0.641	0.311	3.07e-11	7	ENSG00000127920	GNG11	RPE
1955	2.96e-12	0.614666	0.829	0.641	9.94e-08	7	ENSG00000118418	HMGN3	RPE
1956	1.21e-10	0.614156	0.667	0.465	4.07e-06	7	ENSG00000135821	GLUL	RPE
1957	9.03e-14	0.613632	0.359	0.132	3.03e-09	7	ENSG00000167874	TMEM88	RPE
1958	4.59e-12	0.608447	0.786	0.49	1.54e-07	7	ENSG00000038427	VCAN	RPE
1959	2.08e-12	0.608093	0.667	0.429	6.97e-08	7	ENSG00000104763	ASAH1	RPE
1960	1.08e-18	0.605669	0.419	0.139	3.61e-14	7	ENSG00000138074	SLC5A6	RPE
1961	1.83e-15	0.602435	0.385	0.13	6.13e-11	7	ENSG00000139318	DUSP6	RPE
1962	6.42e-21	0.596265	0.402	0.111	2.15e-16	7	ENSG00000182326	C1S	RPE
1963	2.87e-18	0.593344	0.368	0.111	9.63e-14	7	ENSG00000176058	TPRN	RPE
1964	4.67e-14	0.592892	0.855	0.65	1.57e-09	7	ENSG00000169714	CNBP	RPE
1965	1.13e-09	0.592229	0.496	0.271	3.8e-05	7	ENSG00000106070	GRB10	RPE
1966	1.41e-11	0.582328	0.333	0.128	4.74e-07	7	ENSG00000169242	EFNA1	RPE
1967	4.37e-10	0.582015	0.402	0.19	1.47e-05	7	ENSG00000114770	ABCC5	RPE
1968	8.82e-16	0.573747	0.402	0.136	2.96e-11	7	ENSG00000188517	COL25A1	RPE
1969	3.81e-09	0.571497	0.778	0.562	0.000127879	7	ENSG00000167088	SNRPD1	RPE
1970	1.82e-09	0.570659	0.513	0.272	6.11e-05	7	ENSG00000054598	FOXC1	RPE
1971	6.78e-19	0.566844	0.299	0.072	2.27e-14	7	ENSG00000135929	CYP27A1	RPE
1972	7.21e-14	0.566521	0.444	0.172	2.42e-09	7	ENSG00000187800	PEAR1	RPE
1973	1.42e-15	0.565666	0.795	0.477	4.76e-11	7	ENSG00000114315	HES1	RPE
1974	8e-16	0.562575	0.41	0.149	2.68e-11	7	ENSG00000109062	SLC9A3R1	RPE
1975	4.12e-14	0.560624	0.966	0.747	1.38e-09	7	ENSG00000164032	H2AFZ	RPE
1976	4.11e-13	0.559676	0.991	0.839	1.38e-08	7	ENSG00000132475	H3F3B	RPE
1977	1.46e-12	0.557413	0.479	0.218	4.91e-08	7	ENSG00000124126	PREX1	RPE
1978	4.32e-13	0.557045	0.128	0.019	1.45e-08	7	ENSG00000118271	TTR	RPE
1979	5.08e-18	0.556403	0.376	0.114	1.7e-13	7	ENSG00000136478	TEX2	RPE
1980	2.74e-18	0.555815	0.496	0.184	9.2e-14	7	ENSG00000171243	SOSTDC1	RPE
1981	2.84e-14	0.553982	0.667	0.309	9.52e-10	7	ENSG00000171812	COL8A2	RPE
1982	9.47e-13	0.549818	0.581	0.322	3.18e-08	7	ENSG00000130202	NECTIN2	RPE
1983	1.36e-12	0.544941	0.932	0.747	4.57e-08	7	ENSG00000100201	DDX17	RPE
1984	1.37e-13	0.541409	0.915	0.749	4.6e-09	7	ENSG00000135404	CD63	RPE
1985	6.62e-25	0.541289	0.214	0.026	2.22e-20	7	ENSG00000128918	ALDH1A2	RPE
1986	4.34e-10	0.540208	0.41	0.2	1.45e-05	7	ENSG00000176978	DPP7	RPE
1987	3.32e-15	0.539664	0.453	0.174	1.11e-10	7	ENSG00000112419	PHACTR2	RPE
1988	2.36e-20	0.538623	0.299	0.065	7.9e-16	7	ENSG00000158578	ALAS2	RPE
1989	3.2e-28	0.536791	0.239	0.029	1.07e-23	7	ENSG00000121361	KCNJ8	RPE
1990	6.13e-12	0.534838	0.222	0.061	2.06e-07	7	ENSG00000167995	BEST1	RPE
1991	4.08e-11	0.53101	0.47	0.215	1.37e-06	7	ENSG00000101335	MYL9	RPE
1992	1.7e-09	0.529386	0.385	0.182	5.71e-05	7	ENSG00000187634	SAMD11	RPE
1993	5.27e-10	0.527504	0.376	0.163	1.77e-05	7	ENSG00000143195	ILDR2	RPE
1994	3.26e-11	0.527305	0.821	0.594	1.09e-06	7	ENSG00000164104	HMGB2	RPE
1995	4.13e-09	0.526325	0.59	0.344	0.000138463	7	ENSG00000134438	RAX	RPE
1996	4.91e-10	0.524206	0.786	0.555	1.65e-05	7	ENSG00000136295	TTYH3	RPE
1997	3.2e-12	0.522498	0.94	0.815	1.07e-07	7	ENSG00000122566	HNRNPA2B1	RPE
1998	1.95e-15	0.521334	0.402	0.139	6.53e-11	7	ENSG00000136235	GPNMB	RPE
[truncated: 1,639 more rows]

## Sheet: PCW10_15870
ST: 15870; 10 PCW
	p_val	avg_log2FC	pct.1	pct.2	p_val_adj	cluster	gene	Symbol	cell fate
1	0	1.98466	1	0.973	0	0	ENSG00000164692	COL1A2	periocular mesenchyme
2	0	1.97806	1	0.976	0	0	ENSG00000108821	COL1A1	periocular mesenchyme
3	6.19e-200	1.82577	0.888	0.537	2.07e-195	0	ENSG00000106809	OGN	periocular mesenchyme
4	8.56e-87	1.81424	0.382	0.122	2.87e-82	0	ENSG00000181195	PENK	periocular mesenchyme
5	2.76e-299	1.72929	0.999	0.943	9.27e-295	0	ENSG00000113140	SPARC	periocular mesenchyme
6	3.86e-192	1.6847	0.96	0.763	1.3e-187	0	ENSG00000011465	DCN	periocular mesenchyme
7	5.24e-152	1.64633	0.815	0.524	1.76e-147	0	ENSG00000106333	PCOLCE	periocular mesenchyme
8	1.21e-291	1.63207	0.999	0.953	4.06e-287	0	ENSG00000168542	COL3A1	periocular mesenchyme
9	7.89e-189	1.55555	0.898	0.543	2.65e-184	0	ENSG00000111799	COL12A1	periocular mesenchyme
10	4.81e-138	1.50044	0.742	0.383	1.61e-133	0	ENSG00000189129	PLAC9	periocular mesenchyme
11	4.16e-131	1.44721	0.803	0.468	1.4e-126	0	ENSG00000111341	MGP	periocular mesenchyme
12	1.25e-102	1.34951	0.874	0.663	4.2e-98	0	ENSG00000133110	POSTN	periocular mesenchyme
13	1.65e-144	1.33481	0.919	0.717	5.54e-140	0	ENSG00000163430	FSTL1	periocular mesenchyme
14	1.63e-101	1.28771	0.61	0.276	5.47e-97	0	ENSG00000187955	COL14A1	periocular mesenchyme
15	2.98e-88	1.28249	0.607	0.312	1e-83	0	ENSG00000166482	MFAP4	periocular mesenchyme
16	3.2e-80	1.25368	0.44	0.168	1.07e-75	0	ENSG00000186340	THBS2	periocular mesenchyme
17	1.26e-61	1.18809	0.457	0.223	4.22e-57	0	ENSG00000049323	LTBP1	periocular mesenchyme
18	6.84e-153	1.15842	0.94	0.722	2.3e-148	0	ENSG00000100097	LGALS1	periocular mesenchyme
19	9.93e-113	1.13988	0.83	0.553	3.33e-108	0	ENSG00000204262	COL5A2	periocular mesenchyme
20	3.49e-66	1.11137	0.537	0.278	1.17e-61	0	ENSG00000116774	OLFML3	periocular mesenchyme
21	5.06e-66	1.11045	0.426	0.178	1.7e-61	0	ENSG00000113083	LOX	periocular mesenchyme
22	5.06e-64	1.08894	0.282	0.081	1.7e-59	0	ENSG00000106483	SFRP4	periocular mesenchyme
23	3.94e-62	1.07935	0.385	0.15	1.32e-57	0	ENSG00000106819	ASPN	periocular mesenchyme
24	1.98e-111	1.06453	0.898	0.638	6.64e-107	0	ENSG00000115414	FN1	periocular mesenchyme
25	1.32e-70	1.0635	0.709	0.503	4.44e-66	0	ENSG00000087245	MMP2	periocular mesenchyme
26	7.53e-55	1.05985	0.413	0.187	2.53e-50	0	ENSG00000198759	EGFL6	periocular mesenchyme
27	5.87e-82	1.05703	0.737	0.481	1.97e-77	0	ENSG00000084636	COL16A1	periocular mesenchyme
28	2.78e-72	1.05557	0.692	0.459	9.32e-68	0	ENSG00000117122	MFAP2	periocular mesenchyme
29	6.26e-64	1.05556	0.656	0.442	2.1e-59	0	ENSG00000049540	ELN	periocular mesenchyme
30	1.43e-72	1.0458	0.785	0.576	4.79e-68	0	ENSG00000139329	LUM	periocular mesenchyme
31	8.28e-52	1.03957	0.385	0.17	2.78e-47	0	ENSG00000171812	COL8A2	periocular mesenchyme
32	2.04e-72	1.00471	0.713	0.479	6.83e-68	0	ENSG00000138829	FBN2	periocular mesenchyme
33	6.1e-75	1.00363	0.793	0.627	2.05e-70	0	ENSG00000077942	FBLN1	periocular mesenchyme
34	1.01e-50	0.986237	0.382	0.17	3.39e-46	0	ENSG00000140092	FBLN5	periocular mesenchyme
35	1.01e-49	0.98168	0.4	0.183	3.38e-45	0	ENSG00000122176	FMOD	periocular mesenchyme
36	8.63e-59	0.978309	0.39	0.158	2.89e-54	0	ENSG00000164932	CTHRC1	periocular mesenchyme
37	3.92e-62	0.961103	0.75	0.592	1.32e-57	0	ENSG00000115461	IGFBP5	periocular mesenchyme
38	3.35e-34	0.949827	0.416	0.249	1.12e-29	0	ENSG00000075223	SEMA3C	periocular mesenchyme
39	1.19e-43	0.944648	0.466	0.257	3.98e-39	0	ENSG00000101825	MXRA5	periocular mesenchyme
40	2.88e-77	0.937258	0.211	0.035	9.64e-73	0	ENSG00000143196	DPT	periocular mesenchyme
41	7.7e-50	0.933405	0.611	0.415	2.58e-45	0	ENSG00000166147	FBN1	periocular mesenchyme
42	7.83e-72	0.90094	0.515	0.247	2.63e-67	0	ENSG00000060718	COL11A1	periocular mesenchyme
43	3.17e-37	0.889071	0.537	0.368	1.06e-32	0	ENSG00000102265	TIMP1	periocular mesenchyme
44	4.61e-112	0.880157	0.91	0.707	1.55e-107	0	ENSG00000130635	COL5A1	periocular mesenchyme
45	9.31e-38	0.872565	0.506	0.324	3.12e-33	0	ENSG00000147257	GPC3	periocular mesenchyme
46	8.71e-25	0.842133	0.375	0.234	2.92e-20	0	ENSG00000150687	PRSS23	periocular mesenchyme
47	9.45e-38	0.838345	0.275	0.111	3.17e-33	0	ENSG00000104213	PDGFRL	periocular mesenchyme
48	9.29e-33	0.832012	0.579	0.461	3.11e-28	0	ENSG00000136240	KDELR2	periocular mesenchyme
49	3.95e-31	0.825818	0.595	0.451	1.33e-26	0	ENSG00000105894	PTN	periocular mesenchyme
50	8.85e-40	0.822837	0.586	0.412	2.97e-35	0	ENSG00000141753	IGFBP4	periocular mesenchyme
51	7.97e-28	0.816067	0.405	0.251	2.67e-23	0	ENSG00000169604	ANTXR1	periocular mesenchyme
52	4.75e-36	0.813668	0.567	0.408	1.59e-31	0	ENSG00000137070	IL11RA	periocular mesenchyme
53	5.61e-22	0.808342	0.297	0.17	1.88e-17	0	ENSG00000142871	CYR61	periocular mesenchyme
54	1.26e-46	0.808063	0.652	0.456	4.21e-42	0	ENSG00000163191	S100A11	periocular mesenchyme
55	6.28e-29	0.790405	0.477	0.312	2.11e-24	0	ENSG00000144857	BOC	periocular mesenchyme
56	1.91e-28	0.783679	0.422	0.275	6.42e-24	0	ENSG00000143320	CRABP2	periocular mesenchyme
57	1e-37	0.778096	0.631	0.503	3.36e-33	0	ENSG00000035862	TIMP2	periocular mesenchyme
58	1.82e-65	0.772446	0.827	0.626	6.12e-61	0	ENSG00000142173	COL6A2	periocular mesenchyme
59	1.02e-23	0.769406	0.378	0.232	3.41e-19	0	ENSG00000206384	COL6A6	periocular mesenchyme
60	1.62e-39	0.763734	0.246	0.088	5.42e-35	0	ENSG00000143382	ADAMTSL4	periocular mesenchyme
61	2.13e-25	0.762551	0.514	0.375	7.13e-21	0	ENSG00000107562	CXCL12	periocular mesenchyme
62	6.16e-25	0.758273	0.299	0.16	2.07e-20	0	ENSG00000167779	IGFBP6	periocular mesenchyme
63	2.63e-26	0.755304	0.429	0.283	8.81e-22	0	ENSG00000125844	RRBP1	periocular mesenchyme
64	6.29e-23	0.747899	0.442	0.302	2.11e-18	0	ENSG00000163520	FBLN2	periocular mesenchyme
65	1.36e-24	0.742705	0.375	0.231	4.55e-20	0	ENSG00000142227	EMP3	periocular mesenchyme
66	9.5e-19	0.739863	0.343	0.228	3.19e-14	0	ENSG00000169439	SDC2	periocular mesenchyme
67	3.01e-28	0.731142	0.335	0.181	1.01e-23	0	ENSG00000156103	MMP16	periocular mesenchyme
68	2.79e-29	0.720644	0.17	0.057	9.36e-25	0	ENSG00000197614	MFAP5	periocular mesenchyme
69	4.52e-32	0.720018	0.603	0.444	1.51e-27	0	ENSG00000120708	TGFBI	periocular mesenchyme
70	4.65e-24	0.717366	0.485	0.351	1.56e-19	0	ENSG00000178695	KCTD12	periocular mesenchyme
71	1.99e-21	0.715394	0.424	0.294	6.68e-17	0	ENSG00000182492	BGN	periocular mesenchyme
72	5.76e-20	0.709329	0.384	0.26	1.93e-15	0	ENSG00000141756	FKBP10	periocular mesenchyme
73	1.51e-30	0.707303	0.576	0.398	5.07e-26	0	ENSG00000109193	SULT1E1	periocular mesenchyme
74	1.53e-26	0.707182	0.632	0.549	5.14e-22	0	ENSG00000197747	S100A10	periocular mesenchyme
75	4.51e-56	0.694987	0.137	0.019	1.51e-51	0	ENSG00000173698	ADGRG2	periocular mesenchyme
76	1.46e-25	0.694688	0.456	0.31	4.9e-21	0	ENSG00000011028	MRC2	periocular mesenchyme
77	2.54e-30	0.68987	0.232	0.095	8.52e-26	0	ENSG00000157613	CREB3L1	periocular mesenchyme
78	5.74e-24	0.666578	0.489	0.353	1.93e-19	0	ENSG00000106624	AEBP1	periocular mesenchyme
79	1.72e-34	0.652592	0.736	0.606	5.76e-30	0	ENSG00000106484	MEST	periocular mesenchyme
80	2.93e-21	0.639514	0.266	0.14	9.83e-17	0	ENSG00000071967	CYBRD1	periocular mesenchyme
81	5.85e-20	0.63879	0.506	0.397	1.96e-15	0	ENSG00000131016	AKAP12	periocular mesenchyme
82	1.42e-17	0.633749	0.226	0.119	4.75e-13	0	ENSG00000152785	BMP3	periocular mesenchyme
83	1.26e-19	0.633067	0.373	0.247	4.23e-15	0	ENSG00000180447	GAS1	periocular mesenchyme
84	2.14e-19	0.632933	0.301	0.18	7.17e-15	0	ENSG00000143387	CTSK	periocular mesenchyme
85	1.62e-21	0.630579	0.206	0.094	5.42e-17	0	ENSG00000005243	COPZ2	periocular mesenchyme
86	1.25e-21	0.629841	0.53	0.419	4.18e-17	0	ENSG00000197956	S100A6	periocular mesenchyme
87	1.34e-25	0.626235	0.182	0.07	4.5e-21	0	ENSG00000119147	C2orf40	periocular mesenchyme
88	1.47e-14	0.625207	0.24	0.144	4.93e-10	0	ENSG00000154864	PIEZO2	periocular mesenchyme
89	5.55e-21	0.621285	0.185	0.08	1.86e-16	0	ENSG00000136859	ANGPTL2	periocular mesenchyme
90	1.83e-20	0.620771	0.495	0.388	6.14e-16	0	ENSG00000168056	LTBP3	periocular mesenchyme
91	4.95e-50	0.618216	0.892	0.825	1.66e-45	0	ENSG00000110492	MDK	periocular mesenchyme
92	2.67e-18	0.618127	0.538	0.436	8.97e-14	0	ENSG00000078596	ITM2A	periocular mesenchyme
93	1.23e-17	0.613156	0.466	0.362	4.13e-13	0	ENSG00000164111	ANXA5	periocular mesenchyme
94	1.35e-16	0.612911	0.29	0.177	4.53e-12	0	ENSG00000087116	ADAMTS2	periocular mesenchyme
95	6.13e-12	0.612145	0.258	0.168	2.06e-07	0	ENSG00000101955	SRPX	periocular mesenchyme
96	5.72e-16	0.611238	0.267	0.162	1.92e-11	0	ENSG00000118257	NRP2	periocular mesenchyme
97	3.02e-13	0.6103	0.202	0.116	1.01e-08	0	ENSG00000184347	SLIT3	periocular mesenchyme
98	3.9e-74	0.60976	0.964	0.919	1.31e-69	0	ENSG00000140264	SERF2	periocular mesenchyme
99	4.2e-22	0.607015	0.567	0.452	1.41e-17	0	ENSG00000090006	LTBP4	periocular mesenchyme
100	5.57e-11	0.604357	0.471	0.431	1.87e-06	0	ENSG00000102804	TSC22D1	periocular mesenchyme
101	3.51e-12	0.59808	0.308	0.221	1.18e-07	0	ENSG00000141696	P3H4	periocular mesenchyme
102	2.08e-14	0.596008	0.308	0.206	6.97e-10	0	ENSG00000149131	SERPING1	periocular mesenchyme
103	1.16e-18	0.590646	0.12	0.042	3.89e-14	0	ENSG00000164530	PI16	periocular mesenchyme
104	1.07e-17	0.590525	0.564	0.498	3.58e-13	0	ENSG00000123384	LRP1	periocular mesenchyme
105	3.85e-26	0.587898	0.649	0.565	1.29e-21	0	ENSG00000185624	P4HB	periocular mesenchyme
106	1.74e-23	0.584907	0.647	0.536	5.83e-19	0	ENSG00000118971	CCND2	periocular mesenchyme
107	6.19e-37	0.58255	0.784	0.708	2.08e-32	0	ENSG00000110651	CD81	periocular mesenchyme
108	6.86e-49	0.580666	0.93	0.906	2.3e-44	0	ENSG00000198727	MT-CYB	periocular mesenchyme
109	5.19e-12	0.578153	0.198	0.118	1.74e-07	0	ENSG00000150961	SEC24D	periocular mesenchyme
110	7.68e-31	0.577379	0.915	0.884	2.58e-26	0	ENSG00000198840	MT-ND3	periocular mesenchyme
111	3.88e-13	0.576325	0.458	0.386	1.3e-08	0	ENSG00000128595	CALU	periocular mesenchyme
112	1.93e-17	0.575702	0.171	0.079	6.47e-13	0	ENSG00000164303	ENPP6	periocular mesenchyme
113	5.98e-06	0.574482	0.262	0.206	0.200703	0	ENSG00000113296	THBS4	periocular mesenchyme
114	1.5e-22	0.572567	0.163	0.063	5.04e-18	0	ENSG00000145861	C1QTNF2	periocular mesenchyme
115	5.74e-12	0.572515	0.214	0.129	1.93e-07	0	ENSG00000172819	RARG	periocular mesenchyme
116	2.33e-10	0.572323	0.454	0.397	7.81e-06	0	ENSG00000198786	MT-ND5	periocular mesenchyme
117	1.72e-20	0.571609	0.623	0.535	5.76e-16	0	ENSG00000149257	SERPINH1	periocular mesenchyme
118	1.67e-15	0.570786	0.535	0.476	5.61e-11	0	ENSG00000038382	TRIO	periocular mesenchyme
119	6.4e-10	0.570211	0.255	0.18	2.15e-05	0	ENSG00000117385	P3H1	periocular mesenchyme
120	9.87e-12	0.567879	0.375	0.3	3.31e-07	0	ENSG00000196562	SULF2	periocular mesenchyme
121	6.38e-12	0.567218	0.368	0.281	2.14e-07	0	ENSG00000168487	BMP1	periocular mesenchyme
122	5.13e-21	0.567138	0.725	0.685	1.72e-16	0	ENSG00000198763	MT-ND2	periocular mesenchyme
123	1.8e-09	0.563511	0.207	0.138	6.03e-05	0	ENSG00000018236	CNTN1	periocular mesenchyme
124	1.8e-08	0.563406	0.38	0.332	0.00060252	0	ENSG00000168374	ARF4	periocular mesenchyme
125	1.36e-15	0.563228	0.522	0.447	4.57e-11	0	ENSG00000068697	LAPTM4A	periocular mesenchyme
126	1.03e-20	0.56189	0.114	0.036	3.46e-16	0	ENSG00000137558	PI15	periocular mesenchyme
127	3.21e-16	0.558908	0.223	0.121	1.08e-11	0	ENSG00000183160	TMEM119	periocular mesenchyme
128	6.41e-18	0.556977	0.518	0.415	2.15e-13	0	ENSG00000124942	AHNAK	periocular mesenchyme
129	1.49e-14	0.556718	0.29	0.185	4.99e-10	0	ENSG00000054598	FOXC1	periocular mesenchyme
130	9.57e-16	0.556404	0.206	0.108	3.21e-11	0	ENSG00000155011	DKK2	periocular mesenchyme
131	1.71e-12	0.55638	0.208	0.122	5.74e-08	0	ENSG00000159403	C1R	periocular mesenchyme
132	6.29e-14	0.556117	0.238	0.141	2.11e-09	0	ENSG00000127528	KLF2	periocular mesenchyme
133	1.04e-13	0.555899	0.406	0.31	3.48e-09	0	ENSG00000138080	EMILIN1	periocular mesenchyme
134	5.54e-10	0.554423	0.231	0.156	1.86e-05	0	ENSG00000167123	CERCAM	periocular mesenchyme
135	5.88e-18	0.553039	0.185	0.087	1.97e-13	0	ENSG00000176971	FIBIN	periocular mesenchyme
136	2.26e-13	0.552058	0.316	0.217	7.59e-09	0	ENSG00000137573	SULF1	periocular mesenchyme
137	2.09e-46	0.549675	0.956	0.949	7.02e-42	0	ENSG00000198899	MT-ATP6	periocular mesenchyme
138	1.08e-21	0.548166	0.169	0.067	3.62e-17	0	ENSG00000112773	TENT5A	periocular mesenchyme
139	2.33e-12	0.543721	0.235	0.146	7.83e-08	0	ENSG00000164294	GPX8	periocular mesenchyme
140	9.53e-09	0.542213	0.327	0.258	0.000319565	0	ENSG00000232527	AC245595.1	periocular mesenchyme
141	5.35e-12	0.541785	0.603	0.539	1.8e-07	0	ENSG00000145423	SFRP2	periocular mesenchyme
142	2.47e-24	0.541578	0.108	0.029	8.27e-20	0	ENSG00000266524	GDF10	periocular mesenchyme
143	2.22e-11	0.540925	0.26	0.172	7.43e-07	0	ENSG00000174807	CD248	periocular mesenchyme
144	6.08e-13	0.538732	0.206	0.118	2.04e-08	0	ENSG00000176046	NUPR1	periocular mesenchyme
145	9.24e-14	0.538278	0.434	0.334	3.1e-09	0	ENSG00000129009	ISLR	periocular mesenchyme
146	1.94e-18	0.538161	0.525	0.415	6.49e-14	0	ENSG00000132386	SERPINF1	periocular mesenchyme
147	5.45e-17	0.536023	0.151	0.066	1.83e-12	0	ENSG00000153823	PID1	periocular mesenchyme
148	3.51e-17	0.535876	0.154	0.067	1.18e-12	0	ENSG00000122870	BICC1	periocular mesenchyme
149	8.16e-11	0.534299	0.205	0.125	2.74e-06	0	ENSG00000120820	GLT8D2	periocular mesenchyme
150	5.24e-12	0.531479	0.147	0.075	1.76e-07	0	ENSG00000164694	FNDC1	periocular mesenchyme
151	5.83e-06	0.528361	0.191	0.141	0.195682	0	ENSG00000044524	EPHA3	periocular mesenchyme
152	3.55e-13	0.52552	0.171	0.089	1.19e-08	0	ENSG00000204472	AIF1	periocular mesenchyme
153	1.36e-10	0.52112	0.23	0.149	4.55e-06	0	ENSG00000134247	PTGFRN	periocular mesenchyme
154	5.14e-09	0.520159	0.4	0.342	0.000172332	0	ENSG00000123989	CHPF	periocular mesenchyme
155	2.51e-15	0.515304	0.149	0.067	8.41e-11	0	ENSG00000183801	OLFML1	periocular mesenchyme
156	1.48e-14	0.514104	0.627	0.615	4.97e-10	0	ENSG00000105223	PLD3	periocular mesenchyme
157	1.98e-12	0.511619	0.525	0.454	6.64e-08	0	ENSG00000038427	VCAN	periocular mesenchyme
158	1.21e-15	0.508845	0.194	0.099	4.07e-11	0	ENSG00000142552	RCN3	periocular mesenchyme
159	4.48e-09	0.506102	0.345	0.276	0.000150338	0	ENSG00000134250	NOTCH2	periocular mesenchyme
160	4.77e-12	0.503164	0.392	0.302	1.6e-07	0	ENSG00000172638	EFEMP2	periocular mesenchyme
161	4.5e-13	0.501935	0.412	0.321	1.51e-08	0	ENSG00000109099	PMP22	periocular mesenchyme
162	3.27e-09	0.501104	0.274	0.198	0.000109818	0	ENSG00000160932	LY6E	periocular mesenchyme
163	2.26e-33	0.500786	0.873	0.822	7.58e-29	0	ENSG00000277443	MARCKS	periocular mesenchyme
164	0	3.08646	0.995	0.336	0	1	ENSG00000105048	TNNT1	extraocular muscle
165	0	3.08485	0.995	0.292	0	1	ENSG00000143632	ACTA1	extraocular muscle
166	0	3.03591	1	0.642	0	1	ENSG00000159251	ACTC1	extraocular muscle
167	0	2.91734	1	0.63	0	1	ENSG00000109063	MYH3	extraocular muscle
168	0	2.88098	0.992	0.266	0	1	ENSG00000101470	TNNC2	extraocular muscle
169	0	2.81921	0.992	0.319	0	1	ENSG00000159173	TNNI1	extraocular muscle
170	0	2.81765	0.967	0.205	0	1	ENSG00000198336	MYL4	extraocular muscle
171	0	2.79945	0.988	0.289	0	1	ENSG00000168530	MYL1	extraocular muscle
172	0	2.78039	0.934	0.159	0	1	ENSG00000078814	MYH7B	extraocular muscle
173	0	2.76428	1	0.452	0	1	ENSG00000180209	MYLPF	extraocular muscle
174	0	2.69062	0.969	0.248	0	1	ENSG00000130595	TNNT3	extraocular muscle
175	0	2.62272	0.944	0.198	0	1	ENSG00000118194	TNNT2	extraocular muscle
176	0	2.60611	0.914	0.16	0	1	ENSG00000156885	COX6A2	extraocular muscle
177	0	2.59599	0.939	0.189	0	1	ENSG00000130598	TNNI2	extraocular muscle
178	0	2.57784	1	0.911	0	1	ENSG00000214548	MEG3	extraocular muscle
179	0	2.55182	0.97	0.256	0	1	ENSG00000114854	TNNC1	extraocular muscle
180	0	2.53947	0.824	0.122	0	1	ENSG00000111245	MYL2	extraocular muscle
181	0	2.48457	0.903	0.155	0	1	ENSG00000170290	SLN	extraocular muscle
182	0	2.4648	0.984	0.284	0	1	ENSG00000155657	TTN	extraocular muscle
183	0	2.4541	0.853	0.151	0	1	ENSG00000133055	MYBPH	extraocular muscle
184	0	2.35734	0.829	0.099	0	1	ENSG00000185847	LINC01405	extraocular muscle
185	0	2.34677	0.863	0.122	0	1	ENSG00000196091	MYBPC1	extraocular muscle
186	0	2.30248	1	0.581	0	1	ENSG00000198467	TPM2	extraocular muscle
187	0	2.27806	0.895	0.153	0	1	ENSG00000104879	CKM	extraocular muscle
188	0	2.26904	0.913	0.164	0	1	ENSG00000175084	DES	extraocular muscle
189	0	2.23164	0.807	0.117	0	1	ENSG00000160808	MYL3	extraocular muscle
190	0	2.21888	0.814	0.124	0	1	ENSG00000268518	AC020909.2	extraocular muscle
191	0	2.18803	0.865	0.129	0	1	ENSG00000239474	KLHL41	extraocular muscle
192	0	2.16996	0.825	0.131	0	1	ENSG00000092054	MYH7	extraocular muscle
193	0	2.1094	0.847	0.152	0	1	ENSG00000183091	NEB	extraocular muscle
194	0	1.97694	0.72	0.073	0	1	ENSG00000091482	SMPX	extraocular muscle
195	0	1.97338	0.829	0.16	0	1	ENSG00000108515	ENO3	extraocular muscle
196	0	1.94237	0.774	0.118	0	1	ENSG00000122367	LDB3	extraocular muscle
197	0	1.92182	0.796	0.132	0	1	ENSG00000077522	ACTN2	extraocular muscle
198	1.19e-260	1.91143	0.919	0.335	3.99e-256	1	ENSG00000242265	PEG10	extraocular muscle
199	0	1.87427	0.703	0.087	0	1	ENSG00000138435	CHRNA1	extraocular muscle
200	1.89e-296	1.84209	0.72	0.116	6.35e-292	1	ENSG00000196218	RYR1	extraocular muscle
201	0	1.82392	0.69	0.07	0	1	ENSG00000169271	HSPB3	extraocular muscle
202	7.03e-238	1.82192	0.959	0.474	2.36e-233	1	ENSG00000143549	TPM3	extraocular muscle
203	0	1.79585	0.705	0.087	0	1	ENSG00000127743	IL17B	extraocular muscle
204	0	1.76574	0.68	0.075	0	1	ENSG00000129910	CDH15	extraocular muscle
205	0	1.74614	0.664	0.075	0	1	ENSG00000129170	CSRP3	extraocular muscle
206	0	1.70915	0.646	0.071	0	1	ENSG00000133020	MYH8	extraocular muscle
207	0	1.70604	0.647	0.069	0	1	ENSG00000184343	SRPK3	extraocular muscle
208	8.02e-278	1.67892	0.624	0.081	2.69e-273	1	ENSG00000223749	MIR503HG	extraocular muscle
209	2.79e-216	1.67838	0.855	0.279	9.34e-212	1	ENSG00000161281	COX7A1	extraocular muscle
210	1.62e-211	1.65499	0.975	0.615	5.44e-207	1	ENSG00000196465	MYL6B	extraocular muscle
211	1.68e-256	1.6423	0.786	0.17	5.62e-252	1	ENSG00000081189	MEF2C	extraocular muscle
212	0	1.63109	0.595	0.053	0	1	ENSG00000122180	MYOG	extraocular muscle
213	6.49e-273	1.62804	0.641	0.089	2.18e-268	1	ENSG00000215375	MYL5	extraocular muscle
214	3.46e-306	1.57844	0.647	0.074	1.16e-301	1	ENSG00000108823	SGCA	extraocular muscle
215	6.7e-220	1.56694	0.708	0.157	2.25e-215	1	ENSG00000170276	HSPB2	extraocular muscle
216	4.55e-281	1.54654	0.619	0.075	1.52e-276	1	ENSG00000118729	CASQ2	extraocular muscle
217	1.68e-278	1.51496	0.53	0.048	5.64e-274	1	ENSG00000160867	FGFR4	extraocular muscle
218	4.94e-289	1.49919	0.565	0.054	1.66e-284	1	ENSG00000227877	MRLN	extraocular muscle
219	1.84e-177	1.48687	0.845	0.326	6.18e-173	1	ENSG00000132688	NES	extraocular muscle
220	3.71e-291	1.45893	0.554	0.05	1.24e-286	1	ENSG00000139914	FITM1	extraocular muscle
221	1.56e-290	1.45856	0.57	0.055	5.22e-286	1	ENSG00000115593	SMYD1	extraocular muscle
222	5.58e-294	1.45449	0.549	0.048	1.87e-289	1	ENSG00000198125	MB	extraocular muscle
223	7.71e-193	1.44774	0.807	0.247	2.58e-188	1	ENSG00000128591	FLNC	extraocular muscle
224	2.87e-283	1.43889	0.535	0.047	9.62e-279	1	ENSG00000182533	CAV3	extraocular muscle
225	1.9e-234	1.4109	0.522	0.062	6.38e-230	1	ENSG00000135902	CHRND	extraocular muscle
226	2.56e-189	1.4041	0.974	0.633	8.58e-185	1	ENSG00000106211	HSPB1	extraocular muscle
227	3.8e-295	1.38338	0.504	0.036	1.27e-290	1	ENSG00000185482	STAC3	extraocular muscle
228	7.17e-169	1.38219	0.97	0.651	2.4e-164	1	ENSG00000178980	SELENOW	extraocular muscle
229	5.9e-289	1.3701	0.521	0.041	1.98e-284	1	ENSG00000124701	APOBEC2	extraocular muscle
230	8.94e-274	1.36653	0.507	0.043	3e-269	1	ENSG00000142661	MYOM3	extraocular muscle
231	5.52e-246	1.36261	0.512	0.054	1.85e-241	1	ENSG00000165917	RAPSN	extraocular muscle
232	2.52e-222	1.336	0.58	0.086	8.44e-218	1	ENSG00000185739	SRL	extraocular muscle
233	5.61e-201	1.31566	0.545	0.087	1.88e-196	1	ENSG00000036448	MYOM2	extraocular muscle
234	1.87e-229	1.29593	0.488	0.054	6.27e-225	1	ENSG00000122477	LRRC39	extraocular muscle
235	1.94e-164	1.28174	0.577	0.128	6.5e-160	1	ENSG00000067191	CACNB1	extraocular muscle
236	1.26e-145	1.26587	0.733	0.256	4.21e-141	1	ENSG00000178104	PDE4DIP	extraocular muscle
237	3.94e-190	1.25891	0.456	0.058	1.32e-185	1	ENSG00000008517	IL32	extraocular muscle
238	3.78e-105	1.21596	0.736	0.315	1.27e-100	1	ENSG00000160097	FNDC5	extraocular muscle
239	1.28e-138	1.215	0.573	0.146	4.31e-134	1	ENSG00000173442	EHBP1L1	extraocular muscle
240	4.25e-192	1.20737	0.506	0.074	1.43e-187	1	ENSG00000168743	NPNT	extraocular muscle
241	3.47e-246	1.20695	0.433	0.031	1.16e-241	1	ENSG00000144771	LRTM1	extraocular muscle
242	6.9e-148	1.20196	0.619	0.16	2.31e-143	1	ENSG00000135424	ITGA7	extraocular muscle
243	8.05e-164	1.20019	0.442	0.068	2.7e-159	1	ENSG00000278817	AC007325.4	extraocular muscle
244	3.66e-243	1.19667	0.448	0.036	1.23e-238	1	ENSG00000129152	MYOD1	extraocular muscle
245	6.56e-120	1.19572	0.834	0.411	2.2e-115	1	ENSG00000140416	TPM1	extraocular muscle
246	2.86e-142	1.19316	0.661	0.192	9.58e-138	1	ENSG00000167393	PPP2R3B	extraocular muscle
247	6.49e-186	1.17349	0.428	0.052	2.18e-181	1	ENSG00000165973	NELL1	extraocular muscle
248	8.83e-218	1.16722	0.432	0.04	2.96e-213	1	ENSG00000173991	TCAP	extraocular muscle
249	4.29e-257	1.16706	0.415	0.025	1.44e-252	1	ENSG00000271860	AL589740.1	extraocular muscle
250	2.16e-164	1.15817	0.486	0.081	7.24e-160	1	ENSG00000223403	MEG9	extraocular muscle
251	2.31e-224	1.15061	0.45	0.042	7.75e-220	1	ENSG00000141161	UNC45B	extraocular muscle
252	3.43e-121	1.14246	0.809	0.365	1.15e-116	1	ENSG00000174437	ATP2A2	extraocular muscle
253	1.24e-188	1.13778	0.461	0.06	4.15e-184	1	ENSG00000101605	MYOM1	extraocular muscle
254	1.46e-214	1.13637	0.428	0.04	4.89e-210	1	ENSG00000172995	ARPP21	extraocular muscle
255	3.31e-138	1.1298	0.921	0.429	1.11e-133	1	ENSG00000185559	DLK1	extraocular muscle
256	3.59e-244	1.12454	0.376	0.019	1.2e-239	1	ENSG00000169885	CALML6	extraocular muscle
257	2.2e-183	1.12033	0.453	0.059	7.38e-179	1	ENSG00000204219	TCEA3	extraocular muscle
258	3.83e-214	1.11731	0.377	0.028	1.28e-209	1	ENSG00000196296	ATP2A1	extraocular muscle
259	2.56e-154	1.10651	0.549	0.112	8.57e-150	1	ENSG00000123572	NRK	extraocular muscle
260	6.76e-174	1.10408	0.437	0.058	2.27e-169	1	ENSG00000117115	PADI2	extraocular muscle
261	1.36e-201	1.09765	0.362	0.027	4.57e-197	1	ENSG00000237560	LINC01497	extraocular muscle
262	5.79e-111	1.09499	0.638	0.219	1.94e-106	1	ENSG00000154358	OBSCN	extraocular muscle
263	6.96e-177	1.08623	0.384	0.041	2.33e-172	1	ENSG00000176076	KCNE5	extraocular muscle
264	1.58e-142	1.0789	0.486	0.097	5.3e-138	1	ENSG00000171365	CLCN5	extraocular muscle
265	1.07e-111	1.07008	0.797	0.358	3.57e-107	1	ENSG00000136717	BIN1	extraocular muscle
266	1.29e-148	1.06546	0.458	0.08	4.33e-144	1	ENSG00000014138	POLA2	extraocular muscle
267	6.71e-199	1.04484	0.376	0.031	2.25e-194	1	ENSG00000111046	MYF6	extraocular muscle
268	2e-101	1.03545	0.684	0.27	6.7e-97	1	ENSG00000166619	BLCAP	extraocular muscle
269	4.59e-191	1.03463	0.379	0.034	1.54e-186	1	ENSG00000115221	ITGB6	extraocular muscle
270	2.66e-129	1.02956	0.438	0.085	8.92e-125	1	ENSG00000206561	COLQ	extraocular muscle
271	1.55e-120	1.02239	0.568	0.159	5.19e-116	1	ENSG00000165410	CFL2	extraocular muscle
272	2.59e-179	1.01595	0.369	0.036	8.68e-175	1	ENSG00000172399	MYOZ2	extraocular muscle
273	6.6e-117	1.00368	0.565	0.158	2.21e-112	1	ENSG00000103994	ZNF106	extraocular muscle
274	5.75e-132	0.999374	0.474	0.097	1.93e-127	1	ENSG00000065361	ERBB3	extraocular muscle
275	1.65e-93	0.991828	0.852	0.468	5.53e-89	1	ENSG00000117592	PRDX6	extraocular muscle
276	1.19e-111	0.974558	0.481	0.121	4.01e-107	1	ENSG00000072195	SPEG	extraocular muscle
277	1.47e-189	0.974454	0.349	0.027	4.94e-185	1	ENSG00000138100	TRIM54	extraocular muscle
278	8.24e-140	0.971082	0.376	0.054	2.76e-135	1	ENSG00000124762	CDKN1A	extraocular muscle
279	7.19e-188	0.960438	0.303	0.017	2.41e-183	1	ENSG00000081248	CACNA1S	extraocular muscle
280	7.36e-125	0.951395	0.351	0.055	2.47e-120	1	ENSG00000070182	SPTB	extraocular muscle
281	3.12e-89	0.95097	0.572	0.202	1.05e-84	1	ENSG00000169764	UGP2	extraocular muscle
282	2.09e-96	0.93378	0.494	0.144	7.03e-92	1	ENSG00000087085	ACHE	extraocular muscle
283	5.66e-88	0.929955	0.585	0.216	1.9e-83	1	ENSG00000011105	TSPAN9	extraocular muscle
284	4.15e-92	0.926853	0.568	0.19	1.39e-87	1	ENSG00000159713	TPPP3	extraocular muscle
285	3.28e-177	0.915232	0.305	0.02	1.1e-172	1	ENSG00000183631	PRR32	extraocular muscle
286	4.31e-112	0.901252	0.382	0.073	1.45e-107	1	ENSG00000170175	CHRNB1	extraocular muscle
287	5.18e-135	0.892257	0.343	0.045	1.74e-130	1	ENSG00000157510	AFAP1L1	extraocular muscle
288	1.96e-94	0.887936	0.575	0.183	6.59e-90	1	ENSG00000077274	CAPN6	extraocular muscle
289	5.67e-155	0.884706	0.288	0.023	1.9e-150	1	ENSG00000258675	LINC02308	extraocular muscle
290	7.34e-183	0.876412	0.305	0.018	2.46e-178	1	ENSG00000120729	MYOT	extraocular muscle
291	6.28e-103	0.874104	0.409	0.093	2.11e-98	1	ENSG00000136383	ALPK3	extraocular muscle
292	1.94e-173	0.873734	0.303	0.021	6.51e-169	1	ENSG00000265142	MIR133A1HG	extraocular muscle
293	2.39e-105	0.871221	0.402	0.086	8.02e-101	1	ENSG00000162688	AGL	extraocular muscle
294	8.04e-172	0.870367	0.283	0.017	2.7e-167	1	ENSG00000149596	JPH2	extraocular muscle
295	3.63e-153	0.863969	0.344	0.037	1.22e-148	1	ENSG00000166317	SYNPO2L	extraocular muscle
296	1.29e-111	0.860834	0.343	0.058	4.34e-107	1	ENSG00000105251	SHD	extraocular muscle
297	4.98e-124	0.859393	0.333	0.046	1.67e-119	1	ENSG00000176909	MAMSTR	extraocular muscle
298	1.21e-92	0.853231	0.39	0.094	4.06e-88	1	ENSG00000173210	ABLIM3	extraocular muscle
299	4.02e-113	0.850971	0.405	0.079	1.35e-108	1	ENSG00000154553	PDLIM3	extraocular muscle
300	2.59e-158	0.844851	0.295	0.023	8.7e-154	1	ENSG00000106078	COBL	extraocular muscle
301	7.31e-114	0.838108	0.366	0.064	2.45e-109	1	ENSG00000178860	MSC	extraocular muscle
302	6.28e-77	0.836855	0.588	0.221	2.11e-72	1	ENSG00000176014	TUBB6	extraocular muscle
303	1.47e-123	0.83468	0.315	0.041	4.92e-119	1	ENSG00000172508	CARNS1	extraocular muscle
304	5.67e-82	0.831028	0.435	0.127	1.9e-77	1	ENSG00000159348	CYB5R1	extraocular muscle
305	2.06e-168	0.825641	0.275	0.016	6.91e-164	1	ENSG00000009709	PAX7	extraocular muscle
306	1.79e-154	0.818939	0.267	0.018	6e-150	1	ENSG00000174407	MIR1-1HG	extraocular muscle
307	1.61e-71	0.804878	0.242	0.044	5.39e-67	1	ENSG00000101203	COL20A1	extraocular muscle
308	1.56e-163	0.792739	0.295	0.021	5.23e-159	1	ENSG00000157119	KLHL40	extraocular muscle
309	1.76e-98	0.792707	0.364	0.075	5.91e-94	1	ENSG00000112183	RBM24	extraocular muscle
310	3.63e-141	0.792666	0.26	0.02	1.22e-136	1	ENSG00000147573	TRIM55	extraocular muscle
311	2.96e-135	0.782725	0.247	0.018	9.93e-131	1	ENSG00000108878	CACNG1	extraocular muscle
312	8.59e-118	0.782104	0.301	0.04	2.88e-113	1	ENSG00000136842	TMOD1	extraocular muscle
313	6.25e-60	0.77814	0.453	0.168	2.09e-55	1	ENSG00000104936	DMPK	extraocular muscle
314	2.7e-92	0.77343	0.354	0.075	9.04e-88	1	ENSG00000175567	UCP2	extraocular muscle
315	5.03e-84	0.770922	0.438	0.119	1.69e-79	1	ENSG00000076716	GPC4	extraocular muscle
316	3.15e-80	0.768559	0.361	0.088	1.06e-75	1	ENSG00000169116	PARM1	extraocular muscle
317	9.39e-117	0.767203	0.308	0.042	3.15e-112	1	ENSG00000072954	TMEM38A	extraocular muscle
318	1.94e-66	0.756796	0.435	0.146	6.51e-62	1	ENSG00000184489	PTP4A3	extraocular muscle
319	4.05e-85	0.752364	0.474	0.133	1.36e-80	1	ENSG00000041982	TNC	extraocular muscle
320	6.19e-64	0.751986	0.224	0.043	2.08e-59	1	ENSG00000164879	CA3	extraocular muscle
321	1.88e-82	0.751473	0.384	0.097	6.3e-78	1	ENSG00000140403	DNAJA4	extraocular muscle
322	2.41e-140	0.748683	0.272	0.022	8.07e-136	1	ENSG00000167476	JSRP1	extraocular muscle
323	1.75e-53	0.734392	0.509	0.222	5.86e-49	1	ENSG00000215252	GOLGA8B	extraocular muscle
324	1.06e-97	0.731209	0.29	0.045	3.55e-93	1	ENSG00000162614	NEXN	extraocular muscle
325	3.7e-91	0.723671	0.313	0.058	1.24e-86	1	ENSG00000150893	FREM2	extraocular muscle
326	1.17e-61	0.72314	0.474	0.177	3.93e-57	1	ENSG00000138764	CCNG2	extraocular muscle
327	1.88e-79	0.72276	0.972	0.8	6.3e-75	1	ENSG00000265681	RPL17	extraocular muscle
328	1.09e-63	0.717881	0.507	0.198	3.65e-59	1	ENSG00000149925	ALDOA	extraocular muscle
329	1.02e-73	0.706293	0.381	0.102	3.43e-69	1	ENSG00000196569	LAMA2	extraocular muscle
330	1.09e-64	0.704275	0.4	0.128	3.67e-60	1	ENSG00000130005	GAMT	extraocular muscle
331	1.97e-66	0.700743	0.399	0.123	6.6e-62	1	ENSG00000175928	LRRN1	extraocular muscle
332	1.24e-56	0.696852	0.72	0.38	4.16e-52	1	ENSG00000196923	PDLIM7	extraocular muscle
333	3.32e-61	0.695971	0.562	0.226	1.11e-56	1	ENSG00000165458	INPPL1	extraocular muscle
334	3.09e-126	0.694072	0.237	0.019	1.04e-121	1	ENSG00000177238	TRIM72	extraocular muscle
335	3.05e-64	0.688208	0.407	0.129	1.02e-59	1	ENSG00000204291	COL15A1	extraocular muscle
336	3.67e-106	0.685365	0.25	0.029	1.23e-101	1	ENSG00000185437	SH3BGR	extraocular muscle
337	2.61e-115	0.68054	0.231	0.02	8.75e-111	1	ENSG00000147166	ITGB1BP2	extraocular muscle
338	7.08e-53	0.67954	0.506	0.212	2.37e-48	1	ENSG00000260807	AC009041.2	extraocular muscle
339	1.04e-135	0.67642	1	0.975	3.47e-131	1	ENSG00000162244	RPL29	extraocular muscle
340	7.69e-124	0.673964	0.242	0.02	2.58e-119	1	ENSG00000168509	HJV	extraocular muscle
341	1.71e-60	0.673308	0.939	0.712	5.74e-56	1	ENSG00000104529	EEF1D	extraocular muscle
342	1.92e-97	0.66926	0.25	0.033	6.44e-93	1	ENSG00000170417	TMEM182	extraocular muscle
343	7.85e-99	0.669207	0.998	0.9	2.63e-94	1	ENSG00000241343	RPL36A	extraocular muscle
344	9.81e-65	0.669194	0.501	0.179	3.29e-60	1	ENSG00000144749	LRIG1	extraocular muscle
345	1.59e-65	0.668188	0.303	0.074	5.35e-61	1	ENSG00000138449	SLC40A1	extraocular muscle
346	3.31e-61	0.664403	0.278	0.069	1.11e-56	1	ENSG00000129204	USP6	extraocular muscle
347	1.69e-108	0.660884	0.229	0.022	5.67e-104	1	ENSG00000248713	C4orf54	extraocular muscle
348	3.2e-109	0.655189	0.234	0.023	1.07e-104	1	ENSG00000186638	KIF24	extraocular muscle
349	8.15e-53	0.651494	0.888	0.62	2.73e-48	1	ENSG00000135390	ATP5MC2	extraocular muscle
350	4.47e-57	0.648542	0.325	0.092	1.5e-52	1	ENSG00000189058	APOD	extraocular muscle
351	3.88e-59	0.647922	0.453	0.16	1.3e-54	1	ENSG00000101224	CDC25B	extraocular muscle
352	1.91e-101	0.645143	0.997	0.934	6.4e-97	1	ENSG00000196531	NACA	extraocular muscle
353	8.89e-60	0.628595	0.367	0.112	2.98e-55	1	ENSG00000163346	PBXIP1	extraocular muscle
354	8.57e-56	0.62574	0.405	0.141	2.88e-51	1	ENSG00000061938	TNK2	extraocular muscle
355	2.9e-112	0.624455	1	0.964	9.71e-108	1	ENSG00000161970	RPL26	extraocular muscle
356	4.22e-134	0.622306	1	0.981	1.42e-129	1	ENSG00000174444	RPL4	extraocular muscle
357	7.93e-64	0.62209	0.412	0.131	2.66e-59	1	ENSG00000163110	PDLIM5	extraocular muscle
358	9.77e-118	0.621622	0.998	0.97	3.28e-113	1	ENSG00000198034	RPS4X	extraocular muscle
359	1.14e-50	0.61815	0.369	0.129	3.82e-46	1	ENSG00000153956	CACNA2D1	extraocular muscle
360	3.17e-77	0.617089	0.213	0.03	1.06e-72	1	ENSG00000188176	SMTNL2	extraocular muscle
361	1.66e-48	0.614075	0.356	0.124	5.56e-44	1	ENSG00000127418	FGFRL1	extraocular muscle
362	2.01e-48	0.611143	0.297	0.091	6.73e-44	1	ENSG00000108387	2004-09-01	extraocular muscle
363	2.45e-65	0.610504	0.245	0.05	8.23e-61	1	ENSG00000130528	HRC	extraocular muscle
364	1.93e-50	0.609163	0.549	0.238	6.48e-46	1	ENSG00000101335	MYL9	extraocular muscle
365	2.2e-44	0.605992	0.535	0.255	7.37e-40	1	ENSG00000182054	IDH2	extraocular muscle
366	1.56e-64	0.602451	0.521	0.189	5.24e-60	1	ENSG00000164093	PITX2	extraocular muscle
367	1.72e-64	0.598809	0.247	0.05	5.76e-60	1	ENSG00000131650	KREMEN2	extraocular muscle
368	1.82e-55	0.597226	0.367	0.118	6.09e-51	1	ENSG00000131435	PDLIM4	extraocular muscle
369	1.14e-48	0.59677	0.356	0.124	3.82e-44	1	ENSG00000124831	LRRFIP1	extraocular muscle
370	2.4e-44	0.593195	0.824	0.494	8.04e-40	1	ENSG00000053438	NNAT	extraocular muscle
371	3.64e-62	0.591369	0.283	0.069	1.22e-57	1	ENSG00000133315	MACROD1	extraocular muscle
372	2.99e-85	0.590444	0.224	0.03	1e-80	1	ENSG00000197905	TEAD4	extraocular muscle
373	2.46e-76	0.589628	0.208	0.029	8.26e-72	1	ENSG00000158457	TSPAN33	extraocular muscle
374	3.67e-85	0.586304	1	0.935	1.23e-80	1	ENSG00000204628	RACK1	extraocular muscle
375	3.23e-76	0.585432	0.208	0.029	1.08e-71	1	ENSG00000196616	ADH1B	extraocular muscle
376	3.9e-104	0.585238	0.201	0.016	1.31e-99	1	ENSG00000164440	TXLNB	extraocular muscle
377	7.33e-107	0.584406	0.199	0.015	2.46e-102	1	ENSG00000111049	MYF5	extraocular muscle
378	7.62e-16	0.583221	0.348	0.196	2.56e-11	1	ENSG00000113296	THBS4	extraocular muscle
379	5.25e-49	0.582124	0.272	0.078	1.76e-44	1	ENSG00000172346	CSDC2	extraocular muscle
380	1.11e-44	0.58171	0.369	0.136	3.71e-40	1	ENSG00000139289	PHLDA1	extraocular muscle
381	1.8e-79	0.580371	0.257	0.043	6.05e-75	1	ENSG00000043039	BARX2	extraocular muscle
382	2.75e-93	0.577416	1	0.946	9.24e-89	1	ENSG00000149273	RPS3	extraocular muscle
383	7.35e-43	0.57739	0.71	0.399	2.47e-38	1	ENSG00000129757	CDKN1C	extraocular muscle
384	1.45e-48	0.577164	0.931	0.704	4.86e-44	1	ENSG00000145741	BTF3	extraocular muscle
385	2.83e-54	0.574477	0.311	0.09	9.48e-50	1	ENSG00000077157	PPP1R12B	extraocular muscle
386	1.06e-45	0.574049	0.488	0.214	3.56e-41	1	ENSG00000173402	DAG1	extraocular muscle
387	9.55e-39	0.573969	0.387	0.16	3.2e-34	1	ENSG00000064300	NGFR	extraocular muscle
388	4.57e-50	0.571433	0.236	0.059	1.53e-45	1	ENSG00000078328	RBFOX1	extraocular muscle
389	1.4e-45	0.57135	0.647	0.324	4.68e-41	1	ENSG00000124440	HIF3A	extraocular muscle
390	1.01e-108	0.570916	0.163	0.007	3.4e-104	1	ENSG00000170162	VGLL2	extraocular muscle
391	4.3e-59	0.570898	0.283	0.071	1.44e-54	1	ENSG00000132953	XPO4	extraocular muscle
392	4.56e-40	0.570609	0.702	0.407	1.53e-35	1	ENSG00000173457	PPP1R14B	extraocular muscle
393	3.77e-65	0.569837	0.264	0.056	1.27e-60	1	ENSG00000167107	ACSF2	extraocular muscle
394	8.07e-68	0.564017	0.239	0.045	2.71e-63	1	ENSG00000110002	VWA5A	extraocular muscle
395	1.59e-66	0.562054	0.224	0.041	5.33e-62	1	ENSG00000156804	FBXO32	extraocular muscle
396	1.49e-84	0.561756	0.17	0.015	5e-80	1	ENSG00000223855	AC147651.1	extraocular muscle
397	1.6e-61	0.560378	0.292	0.07	5.36e-57	1	ENSG00000092607	TBX15	extraocular muscle
398	7.52e-44	0.558272	0.415	0.167	2.52e-39	1	ENSG00000009954	BAZ1B	extraocular muscle
399	1.83e-53	0.556555	0.26	0.065	6.15e-49	1	ENSG00000000971	CFH	extraocular muscle
400	3.1e-46	0.553992	0.31	0.1	1.04e-41	1	ENSG00000065882	TBC1D1	extraocular muscle
401	2.42e-88	0.553585	0.998	0.956	8.11e-84	1	ENSG00000197958	RPL12	extraocular muscle
402	2.8e-65	0.551739	0.265	0.057	9.38e-61	1	ENSG00000165912	PACSIN3	extraocular muscle
403	1.4e-45	0.551103	0.219	0.055	4.69e-41	1	ENSG00000169436	COL22A1	extraocular muscle
404	6.33e-40	0.550988	0.537	0.265	2.12e-35	1	ENSG00000114416	FXR1	extraocular muscle
405	4.92e-123	0.550291	1	0.993	1.65e-118	1	ENSG00000112306	RPS12	extraocular muscle
406	4.45e-36	0.549515	0.359	0.148	1.49e-31	1	ENSG00000144339	TMEFF2	extraocular muscle
407	1.2e-34	0.549287	0.44	0.206	4.03e-30	1	ENSG00000068903	SIRT2	extraocular muscle
408	2.06e-93	0.548835	0.17	0.012	6.91e-89	1	ENSG00000163380	LMOD3	extraocular muscle
409	4.97e-54	0.548516	0.257	0.064	1.67e-49	1	ENSG00000116741	RGS2	extraocular muscle
410	4.85e-47	0.54821	0.283	0.085	1.63e-42	1	ENSG00000171843	MLLT3	extraocular muscle
411	4.77e-40	0.54784	0.694	0.39	1.6e-35	1	ENSG00000124006	OBSL1	extraocular muscle
412	1.52e-125	0.546964	1	0.995	5.09e-121	1	ENSG00000167526	RPL13	extraocular muscle
413	6.1e-33	0.545508	0.448	0.22	2.05e-28	1	ENSG00000076685	NT5C2	extraocular muscle
414	6.23e-38	0.545201	0.479	0.224	2.09e-33	1	ENSG00000089159	PXN	extraocular muscle
415	3.23e-39	0.544465	0.502	0.232	1.08e-34	1	ENSG00000230630	DNM3OS	extraocular muscle
416	1.14e-81	0.54208	0.196	0.023	3.83e-77	1	ENSG00000127824	TUBA4A	extraocular muscle
417	3.59e-42	0.54145	0.903	0.667	1.2e-37	1	ENSG00000100129	EIF3L	extraocular muscle
418	1.95e-83	0.540708	0.997	0.95	6.55e-79	1	ENSG00000136942	RPL35	extraocular muscle
419	1.46e-52	0.539759	0.305	0.087	4.89e-48	1	ENSG00000138119	MYOF	extraocular muscle
420	3.05e-46	0.539165	0.298	0.093	1.02e-41	1	ENSG00000005513	SOX8	extraocular muscle
421	1.93e-37	0.538528	0.392	0.168	6.47e-33	1	ENSG00000181924	COA4	extraocular muscle
422	3.45e-40	0.538374	0.245	0.076	1.16e-35	1	ENSG00000025039	RRAGD	extraocular muscle
423	1.08e-44	0.538096	0.568	0.265	3.61e-40	1	ENSG00000196141	SPATS2L	extraocular muscle
424	2.52e-108	0.536956	0.171	0.009	8.45e-104	1	ENSG00000234281	LANCL1-AS1	extraocular muscle
425	5.95e-77	0.535111	0.188	0.023	2e-72	1	ENSG00000178821	TMEM52	extraocular muscle
426	2.85e-43	0.53219	0.339	0.122	9.57e-39	1	ENSG00000183762	KREMEN1	extraocular muscle
427	1.19e-33	0.531308	0.428	0.204	3.98e-29	1	ENSG00000022277	RTF2	extraocular muscle
428	2.21e-33	0.530439	0.677	0.413	7.4e-29	1	ENSG00000174021	GNG5	extraocular muscle
429	6.34e-81	0.5286	1	0.978	2.13e-76	1	ENSG00000133112	TPT1	extraocular muscle
430	1.12e-74	0.528496	0.155	0.015	3.76e-70	1	ENSG00000183914	DNAH2	extraocular muscle
431	2.6e-90	0.528264	0.188	0.017	8.73e-86	1	ENSG00000186439	TRDN	extraocular muscle
432	1.47e-56	0.528009	0.224	0.047	4.94e-52	1	ENSG00000095209	TMEM38B	extraocular muscle
433	9.72e-101	0.527787	0.176	0.012	3.26e-96	1	ENSG00000133454	MYO18B	extraocular muscle
434	1.31e-83	0.526524	0.171	0.015	4.4e-79	1	ENSG00000101892	ATP1B4	extraocular muscle
435	4.12e-87	0.526486	0.165	0.013	1.38e-82	1	ENSG00000079393	DUSP13	extraocular muscle
436	9.77e-57	0.52526	0.189	0.034	3.28e-52	1	ENSG00000122574	WIPF3	extraocular muscle
437	9.72e-36	0.523154	0.578	0.309	3.26e-31	1	ENSG00000160789	LMNA	extraocular muscle
438	4.7e-35	0.520509	0.4	0.179	1.58e-30	1	ENSG00000084676	NCOA1	extraocular muscle
439	9.67e-35	0.520223	0.514	0.262	3.24e-30	1	ENSG00000085662	AKR1B1	extraocular muscle
440	2.16e-98	0.518883	1	0.98	7.26e-94	1	ENSG00000142676	RPL11	extraocular muscle
441	1.12e-79	0.516841	0.158	0.014	3.76e-75	1	ENSG00000070031	SCT	extraocular muscle
442	7.58e-80	0.516121	1	0.972	2.54e-75	1	ENSG00000231500	RPS18	extraocular muscle
443	2.32e-70	0.515615	0.198	0.029	7.79e-66	1	ENSG00000145949	MYLK4	extraocular muscle
444	1.7e-72	0.515245	0.185	0.024	5.7e-68	1	ENSG00000267060	PTGES3L	extraocular muscle
445	3.26e-36	0.514721	0.718	0.422	1.09e-31	1	ENSG00000022267	FHL1	extraocular muscle
446	5.35e-57	0.513815	0.241	0.053	1.79e-52	1	ENSG00000154645	CHODL	extraocular muscle
447	1.03e-84	0.511808	0.998	0.956	3.44e-80	1	ENSG00000161016	RPL8	extraocular muscle
448	4.27e-68	0.511679	0.232	0.041	1.43e-63	1	ENSG00000149218	ENDOD1	extraocular muscle
449	8.03e-93	0.511113	1	0.978	2.69e-88	1	ENSG00000143947	RPS27A	extraocular muscle
450	4.04e-35	0.510654	0.384	0.165	1.36e-30	1	ENSG00000116584	ARHGEF2	extraocular muscle
451	3.93e-35	0.510392	0.591	0.316	1.32e-30	1	ENSG00000197043	ANXA6	extraocular muscle
452	1.66e-35	0.509903	0.334	0.136	5.55e-31	1	ENSG00000196557	CACNA1H	extraocular muscle
453	9.56e-88	0.507728	0.143	0.008	3.21e-83	1	ENSG00000254586	AC124301.1	extraocular muscle
454	7.96e-70	0.506242	1	0.936	2.67e-65	1	ENSG00000105193	RPS16	extraocular muscle
455	2.49e-90	0.505408	0.157	0.01	8.35e-86	1	ENSG00000134716	CYP2J2	extraocular muscle
456	3.36e-90	0.503814	0.15	0.009	1.13e-85	1	ENSG00000164122	ASB5	extraocular muscle
457	1.18e-61	0.503756	0.997	0.929	3.97e-57	1	ENSG00000198755	RPL10A	extraocular muscle
458	1.95e-80	0.502351	1	0.961	6.55e-76	1	ENSG00000116251	RPL22	extraocular muscle
459	1.91e-98	0.502308	0.16	0.009	6.41e-94	1	ENSG00000100628	ASB2	extraocular muscle
460	6.97e-31	0.501824	0.397	0.189	2.34e-26	1	ENSG00000214026	MRPL23	extraocular muscle
461	4.23e-63	2.11967	0.931	0.832	1.42e-58	2	ENSG00000188536	HBA2	extraocular muscle/ red blood cells
462	5.23e-54	2.08581	0.699	0.46	1.75e-49	2	ENSG00000206172	HBA1	extraocular muscle/ red blood cells
463	8.05e-65	1.81661	0.923	0.814	2.7e-60	2	ENSG00000196565	HBG2	extraocular muscle/ red blood cells
464	3.72e-44	1.3967	0.622	0.378	1.25e-39	2	ENSG00000213934	HBG1	extraocular muscle/ red blood cells
465	7.51e-130	1.16166	0.923	0.471	2.52e-125	2	ENSG00000180209	MYLPF	extraocular muscle/ red blood cells
466	4.75e-137	1.11689	0.974	0.651	1.59e-132	2	ENSG00000159251	ACTC1	extraocular muscle/ red blood cells
467	7.2e-24	1.09128	0.376	0.208	2.41e-19	2	ENSG00000244734	HBB	extraocular muscle/ red blood cells
468	2.62e-77	0.985639	0.684	0.305	8.78e-73	2	ENSG00000114854	TNNC1	extraocular muscle/ red blood cells
469	8.06e-99	0.962242	0.777	0.328	2.7e-94	2	ENSG00000168530	MYL1	extraocular muscle/ red blood cells
470	2.56e-13	0.945719	0.288	0.183	8.59e-09	2	ENSG00000197943	PLCG2	extraocular muscle/ red blood cells
471	3.01e-86	0.935998	0.964	0.773	1.01e-81	2	ENSG00000011465	DCN	extraocular muscle/ red blood cells
472	8.58e-103	0.925535	0.8	0.328	2.88e-98	2	ENSG00000143632	ACTA1	extraocular muscle/ red blood cells
473	1.5e-110	0.924382	0.938	0.644	5.03e-106	2	ENSG00000109063	MYH3	extraocular muscle/ red blood cells
474	3.95e-42	0.890135	0.727	0.495	1.32e-37	2	ENSG00000111341	MGP	extraocular muscle/ red blood cells
475	1.92e-85	0.88386	0.734	0.311	6.43e-81	2	ENSG00000101470	TNNC2	extraocular muscle/ red blood cells
476	1.84e-51	0.880824	0.526	0.225	6.17e-47	2	ENSG00000175084	DES	extraocular muscle/ red blood cells
477	2.39e-89	0.875652	0.783	0.357	8e-85	2	ENSG00000159173	TNNI1	extraocular muscle/ red blood cells
478	1.32e-49	0.854188	0.504	0.215	4.42e-45	2	ENSG00000104879	CKM	extraocular muscle/ red blood cells
479	1.91e-42	0.848876	0.665	0.445	6.39e-38	2	ENSG00000090006	LTBP4	extraocular muscle/ red blood cells
480	1.17e-41	0.831944	0.661	0.418	3.92e-37	2	ENSG00000166147	FBN1	extraocular muscle/ red blood cells
481	8.9e-56	0.818494	0.672	0.335	2.98e-51	2	ENSG00000155657	TTN	extraocular muscle/ red blood cells
482	3.17e-30	0.816925	0.36	0.171	1.06e-25	2	ENSG00000164920	OSR2	extraocular muscle/ red blood cells
483	6.94e-43	0.807436	0.743	0.524	2.33e-38	2	ENSG00000145423	SFRP2	extraocular muscle/ red blood cells
484	3.37e-76	0.806656	0.659	0.256	1.13e-71	2	ENSG00000198336	MYL4	extraocular muscle/ red blood cells
485	7.11e-39	0.804625	0.44	0.195	2.38e-34	2	ENSG00000239474	KLHL41	extraocular muscle/ red blood cells
486	1.06e-35	0.796765	0.455	0.23	3.55e-31	2	ENSG00000206384	COL6A6	extraocular muscle/ red blood cells
487	2.98e-86	0.782758	0.794	0.372	9.99e-82	2	ENSG00000105048	TNNT1	extraocular muscle/ red blood cells
488	3.54e-27	0.774598	0.498	0.296	1.19e-22	2	ENSG00000128591	FLNC	extraocular muscle/ red blood cells
489	1.75e-23	0.774166	0.281	0.132	5.86e-19	2	ENSG00000185739	SRL	extraocular muscle/ red blood cells
490	3.61e-56	0.773055	0.575	0.247	1.21e-51	2	ENSG00000130598	TNNI2	extraocular muscle/ red blood cells
491	2.31e-24	0.761643	0.33	0.166	7.75e-20	2	ENSG00000174059	CD34	extraocular muscle/ red blood cells
492	7.66e-67	0.755451	0.914	0.669	2.57e-62	2	ENSG00000133110	POSTN	extraocular muscle/ red blood cells
493	1.52e-23	0.734509	0.507	0.33	5.11e-19	2	ENSG00000129009	ISLR	extraocular muscle/ red blood cells
494	4.95e-28	0.733933	0.391	0.193	1.66e-23	2	ENSG00000077522	ACTN2	extraocular muscle/ red blood cells
495	2.22e-41	0.732937	0.47	0.211	7.43e-37	2	ENSG00000133055	MYBPH	extraocular muscle/ red blood cells
496	4.11e-22	0.731883	0.358	0.198	1.38e-17	2	ENSG00000104368	PLAT	extraocular muscle/ red blood cells
497	1.47e-38	0.706072	0.717	0.463	4.94e-34	2	ENSG00000185559	DLK1	extraocular muscle/ red blood cells
498	2.01e-19	0.692186	0.292	0.151	6.74e-15	2	ENSG00000123572	NRK	extraocular muscle/ red blood cells
499	9.86e-26	0.691256	0.247	0.1	3.31e-21	2	ENSG00000178726	THBD	extraocular muscle/ red blood cells
500	1.83e-23	0.688349	0.406	0.219	6.13e-19	2	ENSG00000183091	NEB	extraocular muscle/ red blood cells
501	9.47e-59	0.686827	0.858	0.606	3.18e-54	2	ENSG00000198467	TPM2	extraocular muscle/ red blood cells
502	1.25e-11	0.682957	0.551	0.456	4.19e-07	2	ENSG00000269028	MTRNR2L12	extraocular muscle/ red blood cells
503	3.22e-27	0.680183	0.427	0.222	1.08e-22	2	ENSG00000108515	ENO3	extraocular muscle/ red blood cells
504	2.92e-26	0.66311	0.39	0.194	9.79e-22	2	ENSG00000196091	MYBPC1	extraocular muscle/ red blood cells
505	1.01e-25	0.662089	0.614	0.431	3.37e-21	2	ENSG00000078596	ITM2A	extraocular muscle/ red blood cells
506	7.63e-21	0.659243	0.399	0.229	2.56e-16	2	ENSG00000081189	MEF2C	extraocular muscle/ red blood cells
507	2.64e-15	0.634647	0.421	0.29	8.86e-11	2	ENSG00000147862	NFIB	extraocular muscle/ red blood cells
508	1.72e-14	0.631195	0.217	0.11	5.75e-10	2	ENSG00000146674	IGFBP3	extraocular muscle/ red blood cells
509	1.52e-38	0.630341	0.483	0.22	5.11e-34	2	ENSG00000170290	SLN	extraocular muscle/ red blood cells
510	2.4e-21	0.624786	0.292	0.137	8.06e-17	2	ENSG00000091482	SMPX	extraocular muscle/ red blood cells
511	1.55e-16	0.623582	0.356	0.217	5.2e-12	2	ENSG00000137573	SULF1	extraocular muscle/ red blood cells
512	1.28e-17	0.621395	0.427	0.273	4.29e-13	2	ENSG00000101825	MXRA5	extraocular muscle/ red blood cells
513	1.05e-42	0.618691	0.899	0.73	3.54e-38	2	ENSG00000163430	FSTL1	extraocular muscle/ red blood cells
514	8.13e-24	0.60392	0.676	0.518	2.73e-19	2	ENSG00000143549	TPM3	extraocular muscle/ red blood cells
515	2.88e-21	0.600685	0.303	0.148	9.67e-17	2	ENSG00000127743	IL17B	extraocular muscle/ red blood cells
516	3.87e-20	0.598334	0.67	0.539	1.3e-15	2	ENSG00000118971	CCND2	extraocular muscle/ red blood cells
517	1.62e-13	0.596802	0.386	0.262	5.42e-09	2	ENSG00000075223	SEMA3C	extraocular muscle/ red blood cells
518	2.79e-14	0.589175	0.367	0.243	9.36e-10	2	ENSG00000116132	PRRX1	extraocular muscle/ red blood cells
519	1.52e-14	0.588878	0.174	0.08	5.09e-10	2	ENSG00000154654	NCAM2	extraocular muscle/ red blood cells
520	5.04e-20	0.587501	0.622	0.45	1.69e-15	2	ENSG00000120708	TGFBI	extraocular muscle/ red blood cells
521	2.84e-16	0.585861	0.547	0.416	9.53e-12	2	ENSG00000124942	AHNAK	extraocular muscle/ red blood cells
522	1.49e-11	0.584542	0.313	0.203	5.01e-07	2	ENSG00000113296	THBS4	extraocular muscle/ red blood cells
523	5.53e-35	0.582495	0.481	0.227	1.86e-30	2	ENSG00000156885	COX6A2	extraocular muscle/ red blood cells
524	3.61e-20	0.577431	0.277	0.132	1.21e-15	2	ENSG00000169271	HSPB3	extraocular muscle/ red blood cells
525	2.4e-22	0.573243	0.577	0.388	8.05e-18	2	ENSG00000242265	PEG10	extraocular muscle/ red blood cells
526	8e-16	0.570972	0.384	0.24	2.68e-11	2	ENSG00000150687	PRSS23	extraocular muscle/ red blood cells
527	1.07e-14	0.567475	0.504	0.378	3.58e-10	2	ENSG00000132688	NES	extraocular muscle/ red blood cells
528	2.35e-13	0.564269	0.468	0.337	7.87e-09	2	ENSG00000161281	COX7A1	extraocular muscle/ red blood cells
529	4.94e-15	0.560852	0.316	0.187	1.66e-10	2	ENSG00000129538	RNASE1	extraocular muscle/ red blood cells
530	2.13e-14	0.559978	0.491	0.357	7.16e-10	2	ENSG00000178695	KCTD12	extraocular muscle/ red blood cells
531	4.25e-35	0.559964	0.575	0.31	1.43e-30	2	ENSG00000130595	TNNT3	extraocular muscle/ red blood cells
532	1.21e-12	0.545026	0.354	0.236	4.07e-08	2	ENSG00000177469	CAVIN1	extraocular muscle/ red blood cells
533	1.59e-11	0.544627	0.232	0.133	5.35e-07	2	ENSG00000118729	CASQ2	extraocular muscle/ red blood cells
534	1.73e-13	0.544482	0.275	0.162	5.79e-09	2	ENSG00000078098	FAP	extraocular muscle/ red blood cells
535	1.8e-14	0.541073	0.346	0.218	6.02e-10	2	ENSG00000077274	CAPN6	extraocular muscle/ red blood cells
536	5.96e-24	0.538402	0.354	0.171	2e-19	2	ENSG00000185847	LINC01405	extraocular muscle/ red blood cells
537	8.46e-16	0.538239	0.195	0.089	2.84e-11	2	ENSG00000136999	NOV	extraocular muscle/ red blood cells
538	5.28e-11	0.535635	0.438	0.34	1.77e-06	2	ENSG00000197043	ANXA6	extraocular muscle/ red blood cells
539	1.97e-11	0.535304	0.352	0.242	6.6e-07	2	ENSG00000134853	PDGFRA	extraocular muscle/ red blood cells
540	7.64e-12	0.533626	0.423	0.313	2.56e-07	2	ENSG00000138080	EMILIN1	extraocular muscle/ red blood cells
541	1.98e-10	0.523593	0.358	0.257	6.65e-06	2	ENSG00000099250	NRP1	extraocular muscle/ red blood cells
542	3.9e-23	0.523128	0.76	0.64	1.31e-18	2	ENSG00000077942	FBLN1	extraocular muscle/ red blood cells
543	4.61e-21	0.523024	0.11	0.029	1.55e-16	2	ENSG00000147655	RSPO2	extraocular muscle/ red blood cells
544	8.74e-16	0.519803	0.519	0.381	2.93e-11	2	ENSG00000107562	CXCL12	extraocular muscle/ red blood cells
545	2.14e-09	0.518951	0.159	0.085	7.18e-05	2	ENSG00000069702	TGFBR3	extraocular muscle/ red blood cells
546	1.15e-07	0.516117	0.232	0.156	0.0038657	2	ENSG00000204291	COL15A1	extraocular muscle/ red blood cells
547	8.19e-24	0.515388	0.478	0.269	2.75e-19	2	ENSG00000118194	TNNT2	extraocular muscle/ red blood cells
548	8.59e-15	0.51192	0.169	0.073	2.88e-10	2	ENSG00000105974	CAV1	extraocular muscle/ red blood cells
549	2.05e-16	0.5114	0.584	0.429	6.86e-12	2	ENSG00000163359	COL6A3	extraocular muscle/ red blood cells
550	3.19e-15	0.50597	0.219	0.106	1.07e-10	2	ENSG00000227877	MRLN	extraocular muscle/ red blood cells
551	1.22e-11	0.503771	0.199	0.106	4.11e-07	2	ENSG00000164099	PRSS12	extraocular muscle/ red blood cells
552	7.92e-27	0.503655	0.39	0.188	2.66e-22	2	ENSG00000111245	MYL2	extraocular muscle/ red blood cells
553	7.88e-13	0.503005	0.44	0.31	2.64e-08	2	ENSG00000163520	FBLN2	extraocular muscle/ red blood cells
554	6.67e-19	0.502375	0.766	0.705	2.24e-14	2	ENSG00000102316	MAGED2	extraocular muscle/ red blood cells
555	4.25e-12	0.502048	0.148	0.067	1.43e-07	2	ENSG00000154645	CHODL	extraocular muscle/ red blood cells
556	1.19e-289	2.55324	0.998	0.645	4e-285	3	ENSG00000137285	TUBB2B	RGCs
557	0	2.53488	0.979	0.311	0	3	ENSG00000168824	NSG1	RGCs
558	0	2.49045	0.963	0.236	0	3	ENSG00000130558	OLFM1	RGCs
559	0	2.44786	0.986	0.338	0	3	ENSG00000135406	PRPH	RGCs
560	8.7e-278	2.44392	1	0.759	2.92e-273	3	ENSG00000166426	CRABP1	RGCs
561	0	2.43832	0.986	0.371	0	3	ENSG00000148798	INA	RGCs
562	0	2.42819	0.994	0.367	0	3	ENSG00000072832	CRMP1	RGCs
563	0	2.42454	0.969	0.259	0	3	ENSG00000139970	RTN1	RGCs
564	0	2.42104	0.965	0.247	0	3	ENSG00000132872	SYT4	RGCs
565	0	2.36347	0.979	0.325	0	3	ENSG00000172020	GAP43	RGCs
566	6.42e-288	2.34277	0.998	0.469	2.15e-283	3	ENSG00000104435	STMN2	RGCs
567	4.27e-269	2.14031	0.99	0.51	1.43e-264	3	ENSG00000137267	TUBB2A	RGCs
568	0	2.13752	0.911	0.205	0	3	ENSG00000173267	SNCG	RGCs
569	1.9e-287	2.11079	1	0.951	6.37e-283	3	ENSG00000167552	TUBA1A	RGCs
570	0	2.10134	0.899	0.163	0	3	ENSG00000198910	L1CAM	RGCs
571	5.48e-257	2.05588	0.957	0.328	1.84e-252	3	ENSG00000225783	MIAT	RGCs
572	3.12e-266	2.05573	0.99	0.515	1.04e-261	3	ENSG00000154277	UCHL1	RGCs
573	2.58e-266	2.02288	0.907	0.264	8.66e-262	3	ENSG00000157110	RBPMS	RGCs
574	1.27e-255	1.96623	0.992	0.514	4.27e-251	3	ENSG00000131711	MAP1B	RGCs
575	4.87e-280	1.94255	0.865	0.191	1.63e-275	3	ENSG00000100167	2003-09-01	RGCs
576	1.9e-244	1.93447	0.932	0.331	6.38e-240	3	ENSG00000112972	HMGCS1	RGCs
577	1.2e-246	1.91677	0.836	0.192	4.02e-242	3	ENSG00000184144	CNTN2	RGCs
578	0	1.91208	0.793	0.102	0	3	ENSG00000016082	ISL1	RGCs
579	1.27e-267	1.90215	0.915	0.256	4.25e-263	3	ENSG00000111674	ENO2	RGCs
580	4.84e-256	1.88591	0.795	0.164	1.62e-251	3	ENSG00000104722	NEFM	RGCs
581	2.77e-259	1.88259	0.884	0.224	9.3e-255	3	ENSG00000227051	C14orf132	RGCs
582	2.25e-252	1.83609	0.795	0.163	7.56e-248	3	ENSG00000277586	NEFL	RGCs
583	2.78e-224	1.7813	0.954	0.402	9.32e-220	3	ENSG00000176788	BASP1	RGCs
584	1.97e-217	1.74462	0.965	0.456	6.6e-213	3	ENSG00000272398	CD24	RGCs
585	4.94e-290	1.71529	0.756	0.115	1.66e-285	3	ENSG00000162188	GNG3	RGCs
586	1.02e-215	1.70241	0.94	0.378	3.44e-211	3	ENSG00000213190	MLLT11	RGCs
587	2.44e-236	1.69883	0.801	0.181	8.19e-232	3	ENSG00000145335	SNCA	RGCs
588	1.93e-232	1.67342	0.818	0.191	6.49e-228	3	ENSG00000157851	DPYSL5	RGCs
589	3.07e-260	1.66603	0.779	0.145	1.03e-255	3	ENSG00000164742	ADCY1	RGCs
590	1.24e-289	1.65517	0.737	0.107	4.17e-285	3	ENSG00000116852	KIF21B	RGCs
591	1.29e-244	1.63471	0.824	0.179	4.32e-240	3	ENSG00000078018	MAP2	RGCs
592	1.52e-213	1.6292	0.882	0.263	5.11e-209	3	ENSG00000102109	PCSK1N	RGCs
593	3.12e-265	1.61668	0.727	0.114	1.05e-260	3	ENSG00000186868	MAPT	RGCs
594	2.3e-274	1.61641	0.772	0.125	7.71e-270	3	ENSG00000144834	TAGLN3	RGCs
595	5.28e-242	1.61067	0.772	0.154	1.77e-237	3	ENSG00000170525	PFKFB3	RGCs
596	2.35e-265	1.59475	0.783	0.141	7.88e-261	3	ENSG00000135447	PPP1R1A	RGCs
597	0	1.58804	0.654	0.065	0	3	ENSG00000152192	POU4F1	RGCs
598	8.41e-280	1.57237	0.652	0.079	2.82e-275	3	ENSG00000124785	NRN1	RGCs
599	1.8e-194	1.57232	0.973	0.465	6.05e-190	3	ENSG00000092964	DPYSL2	RGCs
600	8.98e-215	1.55885	0.789	0.183	3.01e-210	3	ENSG00000113161	HMGCR	RGCs
601	2.43e-223	1.54902	0.737	0.143	8.14e-219	3	ENSG00000073670	ADAM11	RGCs
602	3.38e-224	1.54521	0.783	0.168	1.13e-219	3	ENSG00000151640	DPYSL4	RGCs
603	2.32e-204	1.53976	0.988	0.7	7.79e-200	3	ENSG00000143933	CALM2	RGCs
604	4.96e-218	1.53753	0.82	0.199	1.66e-213	3	ENSG00000166922	SCG5	RGCs
605	4.35e-224	1.52329	0.807	0.189	1.46e-219	3	ENSG00000154917	RAB6B	RGCs
606	5.51e-191	1.5182	0.859	0.279	1.85e-186	3	ENSG00000108001	EBF3	RGCs
607	1.44e-262	1.51438	0.702	0.104	4.83e-258	3	ENSG00000162374	ELAVL4	RGCs
608	1.21e-203	1.51079	0.795	0.196	4.07e-199	3	ENSG00000171533	MAP6	RGCs
609	6.11e-197	1.50788	0.855	0.237	2.05e-192	3	ENSG00000133169	BEX1	RGCs
610	3.22e-251	1.50077	1	0.893	1.08e-246	3	ENSG00000117632	STMN1	RGCs
611	6.13e-188	1.48923	0.975	0.49	2.06e-183	3	ENSG00000113657	DPYSL3	RGCs
612	2.27e-230	1.47638	0.741	0.141	7.62e-226	3	ENSG00000188322	SBK1	RGCs
613	1.54e-234	1.4664	0.72	0.128	5.17e-230	3	ENSG00000103034	NDRG4	RGCs
614	1.27e-233	1.45799	0.721	0.127	4.26e-229	3	ENSG00000015592	STMN4	RGCs
615	1.63e-188	1.45645	0.818	0.227	5.47e-184	3	ENSG00000105290	APLP1	RGCs
616	1.07e-179	1.45364	0.745	0.192	3.59e-175	3	ENSG00000175274	TP53I11	RGCs
617	4.9e-262	1.45185	0.584	0.064	1.64e-257	3	ENSG00000215397	SCRT2	RGCs
618	2.75e-195	1.4505	0.76	0.187	9.23e-191	3	ENSG00000077279	DCX	RGCs
619	2.44e-246	1.4459	0.648	0.092	8.17e-242	3	ENSG00000187957	DNER	RGCs
620	5.53e-166	1.44458	0.859	0.308	1.85e-161	3	ENSG00000099194	SCD	RGCs
621	8.98e-164	1.43721	0.886	0.349	3.01e-159	3	ENSG00000169710	FASN	RGCs
622	1.01e-253	1.43675	0.65	0.088	3.39e-249	3	ENSG00000132821	VSTM2L	RGCs
623	3.44e-182	1.43664	0.894	0.3	1.15e-177	3	ENSG00000007372	PAX6	RGCs
624	7.12e-207	1.43522	0.729	0.154	2.39e-202	3	ENSG00000084731	KIF3C	RGCs
625	7.33e-239	1.43494	0.662	0.1	2.46e-234	3	ENSG00000105613	MAST1	RGCs
626	1.21e-210	1.42434	0.706	0.139	4.04e-206	3	ENSG00000075340	ADD2	RGCs
627	4.55e-197	1.42175	0.766	0.181	1.53e-192	3	ENSG00000167178	ISLR2	RGCs
628	5.22e-277	1.42141	0.638	0.073	1.75e-272	3	ENSG00000165646	SLC18A2	RGCs
629	9.78e-172	1.41764	0.894	0.32	3.28e-167	3	ENSG00000243449	C4orf48	RGCs
630	1.43e-246	1.41548	0.648	0.091	4.8e-242	3	ENSG00000196361	ELAVL3	RGCs
631	1.49e-177	1.41523	0.747	0.193	4.98e-173	3	ENSG00000166780	C16orf45	RGCs
632	1.23e-238	1.39837	0.66	0.098	4.14e-234	3	ENSG00000108309	RUNDC3A	RGCs
633	7.26e-175	1.39483	0.977	0.645	2.44e-170	3	ENSG00000067225	PKM	RGCs
634	2.1e-284	1.39445	1	0.992	7.04e-280	3	ENSG00000034510	TMSB10	RGCs
635	2.3e-226	1.39438	0.632	0.095	7.7e-222	3	ENSG00000187122	SLIT1	RGCs
636	1.51e-234	1.39408	0.675	0.106	5.06e-230	3	ENSG00000149926	FAM57B	RGCs
637	5.43e-194	1.38887	0.81	0.207	1.82e-189	3	ENSG00000138083	SIX3	RGCs
638	1.36e-148	1.38846	0.876	0.368	4.55e-144	3	ENSG00000145362	ANK2	RGCs
639	2.66e-165	1.37731	0.774	0.226	8.92e-161	3	ENSG00000130294	KIF1A	RGCs
640	8.98e-162	1.37709	0.814	0.256	3.01e-157	3	ENSG00000197457	STMN3	RGCs
641	2.41e-235	1.37441	0.644	0.094	8.08e-231	3	ENSG00000080644	CHRNA3	RGCs
642	1.54e-194	1.35976	0.669	0.131	5.18e-190	3	ENSG00000213420	GPC2	RGCs
643	9.81e-196	1.35554	0.758	0.174	3.29e-191	3	ENSG00000168280	KIF5C	RGCs
644	1.62e-153	1.34067	0.735	0.213	5.42e-149	3	ENSG00000167508	MVD	RGCs
645	9.5e-145	1.33797	0.89	0.399	3.19e-140	3	ENSG00000149294	NCAM1	RGCs
646	3.72e-155	1.3377	0.936	0.452	1.25e-150	3	ENSG00000189159	JPT1	RGCs
647	1.3e-165	1.33477	0.756	0.208	4.36e-161	3	ENSG00000156298	TSPAN7	RGCs
648	5.51e-152	1.33095	0.911	0.419	1.85e-147	3	ENSG00000126214	KLC1	RGCs
649	1.83e-244	1.32982	0.59	0.071	6.13e-240	3	ENSG00000167371	PRRT2	RGCs
650	3.3e-241	1.30795	0.576	0.069	1.11e-236	3	ENSG00000163531	NFASC	RGCs
651	1.06e-238	1.30706	0.582	0.071	3.55e-234	3	ENSG00000177679	SRRM3	RGCs
652	3.54e-167	1.30497	0.718	0.181	1.19e-162	3	ENSG00000145284	SCD5	RGCs
653	1.11e-203	1.30416	0.665	0.121	3.72e-199	3	ENSG00000115266	APC2	RGCs
654	2.44e-187	1.30394	0.64	0.122	8.19e-183	3	ENSG00000169783	LINGO1	RGCs
655	5.48e-186	1.30144	0.621	0.115	1.84e-181	3	ENSG00000155980	KIF5A	RGCs
656	3.55e-145	1.30081	0.94	0.492	1.19e-140	3	ENSG00000203879	GDI1	RGCs
657	6.32e-147	1.29956	0.66	0.172	2.12e-142	3	ENSG00000120437	ACAT2	RGCs
658	7.3e-232	1.29548	0.6	0.08	2.45e-227	3	ENSG00000124194	GDAP1L1	RGCs
659	1.05e-160	1.29402	0.718	0.186	3.54e-156	3	ENSG00000116133	DHCR24	RGCs
660	7.24e-195	1.2788	0.656	0.123	2.43e-190	3	ENSG00000119782	FKBP1B	RGCs
661	9.96e-170	1.27333	0.584	0.111	3.34e-165	3	ENSG00000067057	PFKP	RGCs
662	2.46e-184	1.27234	0.594	0.103	8.25e-180	3	ENSG00000170561	IRX2	RGCs
663	7.77e-163	1.27197	0.665	0.158	2.61e-158	3	ENSG00000097021	ACOT7	RGCs
664	3.97e-189	1.26509	0.59	0.1	1.33e-184	3	ENSG00000106772	PRUNE2	RGCs
665	7.71e-216	1.2632	0.524	0.063	2.58e-211	3	ENSG00000177551	NHLH2	RGCs
666	2.81e-231	1.2597	0.569	0.069	9.41e-227	3	ENSG00000254377	MIR124-2HG	RGCs
667	1.62e-180	1.25384	0.642	0.127	5.44e-176	3	ENSG00000164176	EDIL3	RGCs
668	4.95e-131	1.25365	0.799	0.307	1.66e-126	3	ENSG00000140941	MAP1LC3B	RGCs
669	7.49e-145	1.25166	0.793	0.269	2.51e-140	3	ENSG00000160285	LSS	RGCs
670	6.83e-164	1.24751	0.677	0.157	2.29e-159	3	ENSG00000143324	XPR1	RGCs
671	9.46e-169	1.23757	0.644	0.138	3.17e-164	3	ENSG00000129355	CDKN2D	RGCs
672	2.08e-165	1.23649	0.718	0.173	6.98e-161	3	ENSG00000150625	GPM6A	RGCs
673	9.36e-140	1.23142	0.785	0.266	3.14e-135	3	ENSG00000079462	PAFAH1B3	RGCs
674	5.1e-124	1.22826	0.826	0.35	1.71e-119	3	ENSG00000105220	GPI	RGCs
675	1.09e-142	1.22574	0.863	0.322	3.66e-138	3	ENSG00000176887	SOX11	RGCs
676	4.44e-204	1.22456	0.553	0.079	1.49e-199	3	ENSG00000152503	TRIM36	RGCs
677	4.36e-168	1.21472	0.615	0.125	1.46e-163	3	ENSG00000117016	RIMS3	RGCs
678	4.32e-138	1.21445	0.735	0.225	1.45e-133	3	ENSG00000186469	GNG2	RGCs
679	8.28e-207	1.20945	0.538	0.07	2.78e-202	3	ENSG00000166831	RBPMS2	RGCs
680	2.06e-215	1.20626	0.545	0.069	6.92e-211	3	ENSG00000087258	GNAO1	RGCs
681	1.12e-203	1.20033	0.503	0.061	3.75e-199	3	ENSG00000151615	POU4F2	RGCs
682	2.27e-143	1.1907	0.694	0.187	7.61e-139	3	ENSG00000104549	SQLE	RGCs
683	9.01e-220	1.18402	0.576	0.076	3.02e-215	3	ENSG00000165434	PGM2L1	RGCs
684	5.02e-204	1.18011	0.511	0.063	1.68e-199	3	ENSG00000103056	SMPD3	RGCs
685	2.92e-183	1.1799	0.545	0.085	9.78e-179	3	ENSG00000100095	SEZ6L	RGCs
686	6.93e-203	1.17244	0.561	0.078	2.32e-198	3	ENSG00000019505	SYT13	RGCs
687	1.29e-126	1.16689	0.729	0.229	4.31e-122	3	ENSG00000079459	FDFT1	RGCs
688	1.93e-263	1.1654	0.435	0.025	6.47e-259	3	ENSG00000163508	EOMES	RGCs
689	1.46e-185	1.16239	0.54	0.082	4.9e-181	3	ENSG00000159164	SV2A	RGCs
690	8.22e-201	1.15538	0.503	0.064	2.76e-196	3	ENSG00000066032	CTNNA2	RGCs
691	3.55e-113	1.14072	0.805	0.327	1.19e-108	3	ENSG00000124357	NAGK	RGCs
692	1.02e-186	1.13685	0.509	0.069	3.44e-182	3	ENSG00000167654	ATCAY	RGCs
693	3.24e-159	1.13473	0.538	0.096	1.09e-154	3	ENSG00000105409	ATP1A3	RGCs
694	1.23e-184	1.13183	0.526	0.077	4.13e-180	3	ENSG00000130287	NCAN	RGCs
695	4.54e-111	1.13166	0.799	0.325	1.52e-106	3	ENSG00000131584	ACAP3	RGCs
696	4.18e-132	1.12687	0.714	0.217	1.4e-127	3	ENSG00000171033	PKIA	RGCs
697	2.2e-176	1.12662	0.472	0.062	7.37e-172	3	ENSG00000011347	SYT7	RGCs
698	2.87e-145	1.12059	0.617	0.141	9.61e-141	3	ENSG00000164330	EBF1	RGCs
699	1.01e-191	1.12037	0.553	0.081	3.4e-187	3	ENSG00000107105	ELAVL2	RGCs
700	3.57e-180	1.11552	0.513	0.076	1.2e-175	3	ENSG00000169862	CTNND2	RGCs
701	1.64e-153	1.1143	0.559	0.109	5.51e-149	3	ENSG00000174938	SEZ6L2	RGCs
702	2.24e-133	1.11226	0.65	0.175	7.5e-129	3	ENSG00000176171	BNIP3	RGCs
703	1.53e-124	1.11078	0.95	0.601	5.13e-120	3	ENSG00000134308	YWHAQ	RGCs
704	1.64e-155	1.10904	0.542	0.1	5.49e-151	3	ENSG00000185008	ROBO2	RGCs
705	1.58e-218	1.1075	0.441	0.038	5.32e-214	3	ENSG00000106536	POU6F2	RGCs
706	7.49e-134	1.10742	0.677	0.185	2.51e-129	3	ENSG00000167535	CACNB3	RGCs
707	4.57e-130	1.1033	0.687	0.198	1.53e-125	3	ENSG00000189056	RELN	RGCs
708	3.18e-187	1.10157	0.464	0.056	1.07e-182	3	ENSG00000184524	CEND1	RGCs
709	4.72e-118	1.09939	0.789	0.292	1.58e-113	3	ENSG00000133318	RTN3	RGCs
710	1.69e-171	1.09829	0.491	0.073	5.65e-167	3	ENSG00000104833	TUBB4A	RGCs
711	3.82e-135	1.09754	0.602	0.144	1.28e-130	3	ENSG00000067840	PDZD4	RGCs
712	7.06e-116	1.09337	0.731	0.247	2.37e-111	3	ENSG00000134313	KIDINS220	RGCs
713	4.74e-116	1.09289	0.936	0.512	1.59e-111	3	ENSG00000197694	SPTAN1	RGCs
714	1.84e-154	1.09187	0.524	0.094	6.16e-150	3	ENSG00000075043	KCNQ2	RGCs
715	1.46e-209	1.07883	0.46	0.046	4.89e-205	3	ENSG00000172137	CALB2	RGCs
716	5.97e-111	1.07752	0.928	0.558	2e-106	3	ENSG00000078369	GNB1	RGCs
717	3e-141	1.0762	0.658	0.164	1e-136	3	ENSG00000018189	RUFY3	RGCs
718	1.38e-173	1.07446	0.489	0.07	4.64e-169	3	ENSG00000065609	SNAP91	RGCs
719	4.8e-108	1.07172	0.77	0.294	1.61e-103	3	ENSG00000108175	ZMIZ1	RGCs
720	7.25e-129	1.06956	0.632	0.168	2.43e-124	3	ENSG00000136854	STXBP1	RGCs
721	2.73e-104	1.06795	0.812	0.351	9.16e-100	3	ENSG00000198911	SREBF2	RGCs
722	7.7e-187	1.06691	0.491	0.063	2.58e-182	3	ENSG00000174521	TTC9B	RGCs
723	1.18e-113	1.06658	0.671	0.208	3.97e-109	3	ENSG00000130827	PLXNA3	RGCs
724	5.33e-124	1.06604	0.503	0.109	1.79e-119	3	ENSG00000236782	AL391650.1	RGCs
725	4.54e-154	1.06366	0.542	0.101	1.52e-149	3	ENSG00000118263	KLF7	RGCs
726	8.38e-124	1.0616	0.654	0.182	2.81e-119	3	ENSG00000105419	MEIS3	RGCs
727	9.41e-189	1.05613	0.427	0.044	3.16e-184	3	ENSG00000185615	PDIA2	RGCs
728	1.68e-105	1.05238	0.834	0.365	5.65e-101	3	ENSG00000182809	CRIP2	RGCs
729	1.45e-137	1.04982	0.53	0.108	4.86e-133	3	ENSG00000084710	EFR3B	RGCs
730	1.9e-101	1.04948	0.892	0.458	6.38e-97	3	ENSG00000090097	PCBP4	RGCs
731	4.72e-114	1.04886	0.696	0.222	1.58e-109	3	ENSG00000166313	APBB1	RGCs
732	3.22e-147	1.04493	0.493	0.086	1.08e-142	3	ENSG00000105255	FSD1	RGCs
733	2.75e-119	1.04478	0.708	0.218	9.22e-115	3	ENSG00000105270	CLIP3	RGCs
734	4.53e-142	1.04467	0.544	0.109	1.52e-137	3	ENSG00000165868	HSPA12A	RGCs
735	1.11e-113	1.04462	0.7	0.218	3.72e-109	3	ENSG00000004777	ARHGAP33	RGCs
736	7.63e-102	1.04426	0.789	0.32	2.56e-97	3	ENSG00000182272	B4GALNT4	RGCs
737	7.67e-114	1.04098	0.963	0.647	2.57e-109	3	ENSG00000175130	MARCKSL1	RGCs
738	1.03e-124	1.04015	0.687	0.197	3.46e-120	3	ENSG00000114631	PODXL2	RGCs
739	1.82e-200	1.03933	0.501	0.061	6.11e-196	3	ENSG00000105649	RAB3A	RGCs
740	3.01e-190	1.0363	0.487	0.061	1.01e-185	3	ENSG00000130540	SULT4A1	RGCs
741	9.78e-177	1.03599	0.466	0.06	3.28e-172	3	ENSG00000157064	NMNAT2	RGCs
742	1.18e-165	1.03368	0.426	0.053	3.97e-161	3	ENSG00000258947	TUBB3	RGCs
743	3.63e-173	1.03364	0.482	0.066	1.22e-168	3	ENSG00000159409	CELF3	RGCs
744	4.08e-144	1.03162	0.513	0.098	1.37e-139	3	ENSG00000103647	CORO2B	RGCs
745	1.18e-126	1.03127	0.551	0.125	3.95e-122	3	ENSG00000167702	KIFC2	RGCs
746	3.2e-96	1.03021	0.901	0.488	1.07e-91	3	ENSG00000134333	LDHA	RGCs
747	3.5e-149	1.02908	0.513	0.091	1.17e-144	3	ENSG00000170091	NSG2	RGCs
748	3.39e-103	1.02901	0.83	0.368	1.14e-98	3	ENSG00000170027	YWHAG	RGCs
749	2.01e-127	1.0134	0.536	0.118	6.73e-123	3	ENSG00000154639	CXADR	RGCs
750	8.21e-164	1.01292	0.439	0.058	2.75e-159	3	ENSG00000221946	FXYD7	RGCs
751	4.81e-113	1.01056	0.963	0.612	1.61e-108	3	ENSG00000074800	ENO1	RGCs
752	8.25e-173	1.00806	0.472	0.064	2.77e-168	3	ENSG00000124191	TOX2	RGCs
753	2.82e-138	1.0079	0.561	0.117	9.47e-134	3	ENSG00000253230	LINC00599	RGCs
754	2.46e-148	1.00491	0.449	0.069	8.24e-144	3	ENSG00000003249	DBNDD1	RGCs
755	3.45e-90	1.00388	0.845	0.422	1.16e-85	3	ENSG00000197102	DYNC1H1	RGCs
756	1.07e-121	1.00373	0.625	0.164	3.6e-117	3	ENSG00000075945	KIFAP3	RGCs
757	4.97e-156	1.00087	0.464	0.07	1.67e-151	3	ENSG00000213760	ATP6V1G2	RGCs
758	7.11e-154	0.99896	0.518	0.091	2.38e-149	3	ENSG00000176749	CDK5R1	RGCs
759	2.3e-108	0.996803	0.758	0.27	7.71e-104	3	ENSG00000142949	PTPRF	RGCs
760	1.66e-143	0.994527	0.52	0.097	5.56e-139	3	ENSG00000248540	AC010931.2	RGCs
761	6.38e-119	0.993369	0.509	0.109	2.14e-114	3	ENSG00000107736	CDH23	RGCs
762	1.79e-113	0.991759	0.669	0.202	5.99e-109	3	ENSG00000160271	RALGDS	RGCs
763	2.15e-120	0.991443	0.53	0.123	7.23e-116	3	ENSG00000171130	ATP6V0E2	RGCs
764	4.76e-95	0.985984	0.644	0.219	1.6e-90	3	ENSG00000196123	KIAA0895L	RGCs
765	1.43e-176	0.984281	0.395	0.04	4.8e-172	3	ENSG00000167281	RBFOX3	RGCs
766	2.25e-182	0.982462	0.42	0.045	7.56e-178	3	ENSG00000148408	CACNA1B	RGCs
767	2.65e-111	0.982354	0.596	0.164	8.87e-107	3	ENSG00000126217	MCF2L	RGCs
768	5.64e-88	0.982272	0.82	0.393	1.89e-83	3	ENSG00000102144	PGK1	RGCs
769	1.09e-203	0.978285	0.429	0.04	3.66e-199	3	ENSG00000129990	SYT5	RGCs
770	2.89e-110	0.976569	0.592	0.16	9.69e-106	3	ENSG00000171617	ENC1	RGCs
771	2.24e-149	0.976528	0.476	0.077	7.53e-145	3	ENSG00000008735	MAPK8IP2	RGCs
772	1.61e-101	0.974462	0.64	0.201	5.41e-97	3	ENSG00000105379	ETFB	RGCs
773	1.4e-148	0.974281	0.458	0.073	4.69e-144	3	ENSG00000173898	SPTBN2	RGCs
774	9.54e-147	0.974125	0.458	0.073	3.2e-142	3	ENSG00000104112	SCG3	RGCs
775	3.51e-136	0.966047	0.441	0.073	1.18e-131	3	ENSG00000174871	CNIH2	RGCs
776	6.32e-131	0.964696	0.433	0.074	2.12e-126	3	ENSG00000166257	SCN3B	RGCs
777	5.98e-149	0.962452	0.422	0.059	2e-144	3	ENSG00000165644	COMTD1	RGCs
778	2.23e-198	0.960432	0.402	0.035	7.49e-194	3	ENSG00000092051	JPH4	RGCs
779	5.75e-96	0.959945	0.708	0.261	1.93e-91	3	ENSG00000108828	VAT1	RGCs
780	9.76e-155	0.958713	0.424	0.057	3.27e-150	3	ENSG00000261678	SCRT1	RGCs
781	9.23e-134	0.953717	0.499	0.097	3.1e-129	3	ENSG00000151320	AKAP6	RGCs
782	1.13e-147	0.95349	0.468	0.076	3.79e-143	3	ENSG00000176956	LY6H	RGCs
783	1.31e-98	0.953103	0.687	0.238	4.39e-94	3	ENSG00000137942	FNBP1L	RGCs
784	2.86e-155	0.951018	0.42	0.056	9.59e-151	3	ENSG00000109956	B3GAT1	RGCs
785	8.23e-118	0.950816	0.453	0.09	2.76e-113	3	ENSG00000132563	REEP2	RGCs
786	4.91e-184	0.949362	0.381	0.034	1.65e-179	3	ENSG00000119283	TRIM67	RGCs
787	1.69e-93	0.948462	0.75	0.301	5.67e-89	3	ENSG00000117410	ATP6V0B	RGCs
788	3.67e-133	0.944563	0.466	0.084	1.23e-128	3	ENSG00000067715	SYT1	RGCs
789	9.49e-114	0.942563	0.503	0.113	3.18e-109	3	ENSG00000186480	INSIG1	RGCs
790	3.23e-134	0.942443	0.474	0.086	1.08e-129	3	ENSG00000084628	NKAIN1	RGCs
791	9.57e-92	0.938193	0.656	0.229	3.21e-87	3	ENSG00000099864	PALM	RGCs
792	1.7e-86	0.936634	0.899	0.514	5.71e-82	3	ENSG00000196405	EVL	RGCs
793	9.33e-126	0.934339	0.534	0.118	3.13e-121	3	ENSG00000257151	PWAR6	RGCs
794	1.02e-151	0.934314	0.402	0.052	3.42e-147	3	ENSG00000101204	CHRNA4	RGCs
795	3.42e-130	0.930761	0.447	0.078	1.15e-125	3	ENSG00000188042	ARL4C	RGCs
796	3.74e-95	0.927938	0.625	0.2	1.25e-90	3	ENSG00000165238	WNK2	RGCs
797	1.24e-96	0.926347	0.615	0.19	4.16e-92	3	ENSG00000259439	LINC01833	RGCs
798	3.42e-124	0.92444	0.485	0.096	1.15e-119	3	ENSG00000198963	RORB	RGCs
799	2.81e-168	0.923982	0.391	0.041	9.44e-164	3	ENSG00000196132	MYT1	RGCs
800	3.03e-90	0.921237	0.617	0.203	1.02e-85	3	ENSG00000163539	CLASP2	RGCs
801	1.75e-113	0.916607	0.983	0.682	5.87e-109	3	ENSG00000166165	CKB	RGCs
802	7.01e-98	0.910187	0.615	0.187	2.35e-93	3	ENSG00000160753	RUSC1	RGCs
803	2.63e-151	0.909616	0.418	0.057	8.8e-147	3	ENSG00000183570	PCBP3	RGCs
804	5.49e-94	0.908984	0.956	0.652	1.84e-89	3	ENSG00000115310	RTN4	RGCs
805	6.16e-163	0.906026	0.375	0.04	2.06e-158	3	ENSG00000125966	MMP24	RGCs
806	4.29e-159	0.905837	0.379	0.042	1.44e-154	3	ENSG00000159784	FAM131B	RGCs
807	2.98e-179	0.903697	0.383	0.036	9.99e-175	3	ENSG00000136928	GABBR2	RGCs
808	4.74e-87	0.901536	0.905	0.506	1.59e-82	3	ENSG00000118816	CCNI	RGCs
809	6.46e-144	0.899709	0.404	0.056	2.17e-139	3	ENSG00000196353	CPNE4	RGCs
810	2.7e-82	0.899014	0.764	0.327	9.05e-78	3	ENSG00000105254	TBCB	RGCs
811	2.98e-82	0.892522	0.766	0.324	9.98e-78	3	ENSG00000054523	KIF1B	RGCs
812	1.61e-104	0.892095	0.495	0.118	5.42e-100	3	ENSG00000101210	EEF1A2	RGCs
813	4.05e-97	0.891858	0.594	0.177	1.36e-92	3	ENSG00000133134	BEX2	RGCs
814	1.58e-108	0.888187	0.468	0.101	5.29e-104	3	ENSG00000205336	ADGRG1	RGCs
815	8.51e-84	0.886913	0.845	0.397	2.86e-79	3	ENSG00000124766	SOX4	RGCs
816	5.47e-93	0.886403	0.95	0.691	1.84e-88	3	ENSG00000164924	YWHAZ	RGCs
817	6.74e-111	0.884951	0.522	0.125	2.26e-106	3	ENSG00000020129	NCDN	RGCs
818	1.38e-87	0.884597	0.646	0.218	4.64e-83	3	ENSG00000064547	LPAR2	RGCs
819	5.44e-133	0.884313	0.408	0.063	1.82e-128	3	ENSG00000177875	CCDC184	RGCs
820	3.71e-161	0.878132	0.34	0.031	1.24e-156	3	ENSG00000144550	CPNE9	RGCs
821	1.97e-124	0.873394	0.4	0.065	6.59e-120	3	ENSG00000183248	PRR36	RGCs
822	2.75e-100	0.873018	0.402	0.082	9.23e-96	3	ENSG00000143630	HCN3	RGCs
823	1.32e-97	0.872424	0.545	0.148	4.43e-93	3	ENSG00000111371	SLC38A1	RGCs
824	3.06e-114	0.870808	0.439	0.085	1.03e-109	3	ENSG00000170549	IRX1	RGCs
825	1.59e-85	0.868906	0.95	0.627	5.32e-81	3	ENSG00000111669	TPI1	RGCs
826	9.49e-138	0.867537	0.366	0.047	3.18e-133	3	ENSG00000118432	CNR1	RGCs
827	1.75e-142	0.860809	0.4	0.055	5.88e-138	3	ENSG00000171224	FAM241B	RGCs
828	3.37e-126	0.859017	0.404	0.065	1.13e-121	3	ENSG00000169213	RAB3B	RGCs
829	4.59e-143	0.858793	0.358	0.042	1.54e-138	3	ENSG00000161082	CELF5	RGCs
830	1.51e-85	0.858085	0.528	0.155	5.06e-81	3	ENSG00000198720	ANKRD13B	RGCs
831	5.03e-159	0.85704	0.337	0.031	1.69e-154	3	ENSG00000127585	FBXL16	RGCs
832	2.55e-125	0.856996	0.414	0.069	8.57e-121	3	ENSG00000128266	GNAZ	RGCs
833	5.55e-119	0.854591	0.373	0.058	1.86e-114	3	ENSG00000168546	GFRA2	RGCs
834	5.96e-98	0.853595	0.515	0.132	2e-93	3	ENSG00000145247	OCIAD2	RGCs
835	5.73e-135	0.852866	0.404	0.06	1.92e-130	3	ENSG00000076826	CAMSAP3	RGCs
836	2.98e-129	0.852219	0.47	0.086	1e-124	3	ENSG00000167100	SAMD14	RGCs
837	6.24e-73	0.851696	0.644	0.252	2.09e-68	3	ENSG00000175582	RAB6A	RGCs
838	3.26e-141	0.851578	0.385	0.051	1.09e-136	3	ENSG00000145920	CPLX2	RGCs
839	3e-109	0.84769	0.451	0.094	1.01e-104	3	ENSG00000163618	CADPS	RGCs
840	9.05e-129	0.8473	0.379	0.054	3.04e-124	3	ENSG00000131037	EPS8L1	RGCs
841	3.56e-157	0.844156	0.385	0.043	1.19e-152	3	ENSG00000186648	CARMIL3	RGCs
842	8e-72	0.843324	0.731	0.33	2.68e-67	3	ENSG00000111897	SERINC1	RGCs
843	5.22e-87	0.841672	0.592	0.191	1.75e-82	3	ENSG00000137343	ATAT1	RGCs
844	6.79e-85	0.840794	0.592	0.192	2.28e-80	3	ENSG00000173801	JUP	RGCs
845	9.17e-125	0.840705	0.373	0.056	3.08e-120	3	ENSG00000215218	UBE2QL1	RGCs
846	9.94e-119	0.838978	0.418	0.073	3.33e-114	3	ENSG00000120251	GRIA2	RGCs
847	8.34e-151	0.838461	0.348	0.036	2.8e-146	3	ENSG00000154928	EPHB1	RGCs
848	1.61e-104	0.83493	0.385	0.073	5.4e-100	3	ENSG00000240694	PNMA2	RGCs
849	1.01e-128	0.832917	0.996	0.932	3.38e-124	3	ENSG00000196230	TUBB	RGCs
850	6.63e-147	0.830843	0.346	0.037	2.22e-142	3	ENSG00000146267	FAXC	RGCs
851	1.51e-135	0.830227	0.404	0.059	5.08e-131	3	ENSG00000175161	CADM2	RGCs
852	1.42e-150	0.829779	0.327	0.031	4.76e-146	3	ENSG00000167889	MGAT5B	RGCs
853	2.63e-181	0.824824	0.358	0.029	8.81e-177	3	ENSG00000130477	UNC13A	RGCs
854	9.15e-97	0.823985	0.487	0.122	3.07e-92	3	ENSG00000178531	CTXN1	RGCs
855	2.67e-71	0.823296	0.778	0.362	8.97e-67	3	ENSG00000182534	MXRA7	RGCs
856	2.39e-117	0.822085	0.375	0.059	8.01e-113	3	ENSG00000008300	CELSR3	RGCs
857	6.99e-128	0.821561	0.42	0.069	2.35e-123	3	ENSG00000181541	MAB21L2	RGCs
858	2.15e-100	0.81901	0.455	0.104	7.2e-96	3	ENSG00000198478	SH3BGRL2	RGCs
859	1.88e-77	0.816019	0.689	0.269	6.3e-73	3	ENSG00000077380	DYNC1I2	RGCs
860	1.07e-73	0.815382	0.886	0.494	3.59e-69	3	ENSG00000053438	NNAT	RGCs
861	1.56e-74	0.813821	0.629	0.235	5.23e-70	3	ENSG00000135596	MICAL1	RGCs
862	2.8e-96	0.812041	0.387	0.079	9.39e-92	3	ENSG00000143171	RXRG	RGCs
863	3.51e-155	0.811708	0.338	0.032	1.18e-150	3	ENSG00000054356	PTPRN	RGCs
864	1.41e-70	0.81135	0.905	0.563	4.72e-66	3	ENSG00000159335	PTMS	RGCs
865	2.36e-107	0.809682	0.443	0.091	7.91e-103	3	ENSG00000106089	STX1A	RGCs
866	7.72e-102	0.809557	0.426	0.088	2.59e-97	3	ENSG00000132639	SNAP25	RGCs
867	2.09e-71	0.809457	0.81	0.404	7.01e-67	3	ENSG00000137726	FXYD6	RGCs
868	9.11e-131	0.808411	0.337	0.041	3.06e-126	3	ENSG00000169258	GPRIN1	RGCs
869	8.79e-69	0.807723	0.778	0.382	2.95e-64	3	ENSG00000128245	YWHAH	RGCs
870	4.86e-84	0.806527	0.507	0.148	1.63e-79	3	ENSG00000172915	NBEA	RGCs
871	2.7e-73	0.805672	0.671	0.265	9.05e-69	3	ENSG00000134824	FADS2	RGCs
872	1.12e-78	0.804812	0.948	0.641	3.75e-74	3	ENSG00000113558	SKP1	RGCs
873	2.65e-70	0.80353	0.874	0.52	8.9e-66	3	ENSG00000160014	CALM3	RGCs
874	1.32e-102	0.800832	0.433	0.091	4.42e-98	3	ENSG00000143850	PLEKHA6	RGCs
875	2.79e-111	0.799583	0.395	0.07	9.36e-107	3	ENSG00000174672	BRSK2	RGCs
876	2.85e-147	0.799233	0.36	0.04	9.57e-143	3	ENSG00000274956	AC120042.3	RGCs
877	1.41e-69	0.796821	0.596	0.22	4.74e-65	3	ENSG00000272325	NUDT3	RGCs
878	1.74e-123	0.793732	0.4	0.064	5.84e-119	3	ENSG00000173114	LRRN3	RGCs
879	2.98e-113	0.793663	0.369	0.06	9.99e-109	3	ENSG00000139220	PPFIA2	RGCs
880	2.64e-130	0.792254	0.379	0.053	8.86e-126	3	ENSG00000149243	KLHL35	RGCs
881	1.44e-121	0.791806	0.364	0.054	4.82e-117	3	ENSG00000089199	CHGB	RGCs
882	2.52e-143	0.788776	0.342	0.038	8.46e-139	3	ENSG00000174460	ZCCHC12	RGCs
883	2.64e-86	0.787395	0.449	0.114	8.86e-82	3	ENSG00000162545	CAMK2N1	RGCs
884	5.54e-77	0.787312	0.658	0.248	1.86e-72	3	ENSG00000171604	CXXC5	RGCs
885	1.16e-75	0.785568	0.426	0.116	3.89e-71	3	ENSG00000151150	ANK3	RGCs
886	9.91e-102	0.7841	0.368	0.068	3.32e-97	3	ENSG00000162706	CADM3	RGCs
887	3.74e-147	0.783909	0.309	0.028	1.25e-142	3	ENSG00000186487	MYT1L	RGCs
888	3.72e-143	0.777493	0.331	0.034	1.25e-138	3	ENSG00000006128	TAC1	RGCs
889	7.12e-66	0.776299	0.727	0.327	2.39e-61	3	ENSG00000127616	SMARCA4	RGCs
890	5.58e-75	0.775768	0.574	0.192	1.87e-70	3	ENSG00000132718	SYT11	RGCs
891	3.47e-68	0.774973	0.534	0.185	1.16e-63	3	ENSG00000067064	IDI1	RGCs
892	1.36e-97	0.774752	0.429	0.093	4.57e-93	3	ENSG00000105696	TMEM59L	RGCs
893	4.97e-119	0.773949	0.335	0.045	1.67e-114	3	ENSG00000142549	IGLON5	RGCs
894	1.06e-161	0.769009	0.298	0.021	3.54e-157	3	ENSG00000249853	HS3ST5	RGCs
895	4.4e-64	0.76685	0.594	0.229	1.48e-59	3	ENSG00000168209	DDIT4	RGCs
896	3.24e-103	0.762588	0.337	0.055	1.09e-98	3	ENSG00000176490	DIRAS1	RGCs
897	3.77e-72	0.760933	0.522	0.168	1.26e-67	3	ENSG00000156515	HK1	RGCs
898	4.28e-70	0.760544	0.932	0.596	1.43e-65	3	ENSG00000240972	MIF	RGCs
899	7.55e-107	0.759529	0.333	0.051	2.53e-102	3	ENSG00000109107	ALDOC	RGCs
900	1.98e-66	0.757714	0.671	0.284	6.64e-62	3	ENSG00000146425	DYNLT1	RGCs
901	4.16e-132	0.756983	0.327	0.038	1.4e-127	3	ENSG00000166501	PRKCB	RGCs
902	9.93e-79	0.755935	0.538	0.166	3.33e-74	3	ENSG00000052802	MSMO1	RGCs
903	1.55e-66	0.75391	0.625	0.241	5.21e-62	3	ENSG00000090238	YPEL3	RGCs
904	2.28e-79	0.753475	0.426	0.11	7.64e-75	3	ENSG00000167972	ABCA3	RGCs
905	2.61e-81	0.752646	0.567	0.181	8.77e-77	3	ENSG00000220205	VAMP2	RGCs
906	8.34e-136	0.751504	0.327	0.036	2.8e-131	3	ENSG00000077080	ACTL6B	RGCs
907	1.83e-109	0.751336	0.366	0.06	6.13e-105	3	ENSG00000163462	TRIM46	RGCs
908	5.63e-63	0.751231	0.532	0.192	1.89e-58	3	ENSG00000082397	EPB41L3	RGCs
909	2.12e-69	0.750385	0.586	0.212	7.12e-65	3	ENSG00000054793	ATP9A	RGCs
910	2.02e-64	0.750329	0.673	0.287	6.77e-60	3	ENSG00000166913	YWHAB	RGCs
911	3.82e-60	0.749251	0.654	0.292	1.28e-55	3	ENSG00000137817	PARP6	RGCs
912	4.25e-83	0.748931	0.511	0.147	1.43e-78	3	ENSG00000033627	ATP6V0A1	RGCs
913	5.69e-56	0.747753	0.828	0.498	1.91e-51	3	ENSG00000198668	CALM1	RGCs
914	1.89e-64	0.747002	0.602	0.234	6.34e-60	3	ENSG00000188070	C11orf95	RGCs
915	1.62e-131	0.746928	0.354	0.045	5.44e-127	3	ENSG00000184905	TCEAL2	RGCs
916	5.18e-129	0.742358	0.286	0.028	1.74e-124	3	ENSG00000135454	B4GALNT1	RGCs
917	2.82e-57	0.742124	0.754	0.388	9.46e-53	3	ENSG00000241973	PI4KA	RGCs
918	7.74e-65	0.742098	0.913	0.602	2.6e-60	3	ENSG00000230989	HSBP1	RGCs
919	1.07e-77	0.741082	0.522	0.16	3.6e-73	3	ENSG00000163697	APBB2	RGCs
920	3.85e-64	0.740956	0.596	0.226	1.29e-59	3	ENSG00000158164	TMSB15A	RGCs
921	7.7e-74	0.740452	0.729	0.298	2.58e-69	3	ENSG00000204580	DDR1	RGCs
922	4.75e-119	0.739666	0.309	0.038	1.59e-114	3	ENSG00000101489	CELF4	RGCs
923	7.83e-64	0.738442	0.691	0.297	2.63e-59	3	ENSG00000107281	NPDC1	RGCs
924	2.27e-115	0.733844	0.352	0.052	7.62e-111	3	ENSG00000099849	RASSF7	RGCs
925	9.61e-104	0.732273	0.348	0.057	3.22e-99	3	ENSG00000139200	PIANP	RGCs
926	4.62e-89	0.73088	0.368	0.076	1.55e-84	3	ENSG00000141622	RNF165	RGCs
927	1.8e-102	0.728877	0.317	0.048	6.02e-98	3	ENSG00000166206	GABRB3	RGCs
928	1.96e-75	0.728131	0.511	0.156	6.59e-71	3	ENSG00000034053	APBA2	RGCs
929	1.99e-81	0.727917	0.35	0.075	6.68e-77	3	ENSG00000084764	MAPRE3	RGCs
930	3.93e-80	0.72714	0.497	0.143	1.32e-75	3	ENSG00000067836	ROGDI	RGCs
931	5.13e-101	0.726273	0.331	0.054	1.72e-96	3	ENSG00000188573	FBLL1	RGCs
932	2.65e-116	0.725124	0.302	0.037	8.88e-112	3	ENSG00000143032	BARHL2	RGCs
933	2.71e-84	0.724924	0.397	0.092	9.1e-80	3	ENSG00000125170	DOK4	RGCs
934	1.92e-62	0.724864	0.654	0.277	6.45e-58	3	ENSG00000131473	ACLY	RGCs
935	2.35e-61	0.722004	0.747	0.343	7.87e-57	3	ENSG00000196591	HDAC2	RGCs
936	9.02e-76	0.721928	0.515	0.157	3.03e-71	3	ENSG00000198722	UNC13B	RGCs
937	3.34e-72	0.720515	0.503	0.159	1.12e-67	3	ENSG00000197183	NOL4L	RGCs
938	5.62e-74	0.719491	0.439	0.124	1.88e-69	3	ENSG00000106665	CLIP2	RGCs
939	2.13e-53	0.719092	0.822	0.475	7.14e-49	3	ENSG00000171314	PGAM1	RGCs
940	8.7e-105	0.71816	0.366	0.062	2.92e-100	3	ENSG00000141668	CBLN2	RGCs
941	2.4e-109	0.71735	0.331	0.049	8.05e-105	3	ENSG00000125851	PCSK2	RGCs
942	4.21e-88	0.716988	0.393	0.085	1.41e-83	3	ENSG00000109339	MAPK10	RGCs
943	5.25e-59	0.715259	0.687	0.304	1.76e-54	3	ENSG00000188157	AGRN	RGCs
944	1.23e-116	0.714373	0.3	0.036	4.12e-112	3	ENSG00000178233	TMEM151B	RGCs
945	3.54e-74	0.71218	0.513	0.161	1.19e-69	3	ENSG00000184602	SNN	RGCs
946	5.01e-92	0.71172	0.397	0.083	1.68e-87	3	ENSG00000104381	GDAP1	RGCs
947	3.87e-121	0.709144	0.35	0.049	1.3e-116	3	ENSG00000139767	SRRM4	RGCs
948	2.04e-92	0.708893	0.4	0.085	6.85e-88	3	ENSG00000055118	KCNH2	RGCs
949	4.44e-136	0.705526	0.288	0.026	1.49e-131	3	ENSG00000091664	SLC17A6	RGCs
950	2.22e-56	0.703652	0.689	0.317	7.43e-52	3	ENSG00000128989	ARPP19	RGCs
951	8.98e-65	0.703361	0.449	0.14	3.01e-60	3	ENSG00000180660	MAB21L1	RGCs
952	6.74e-109	0.703264	0.327	0.048	2.26e-104	3	ENSG00000102003	SYP	RGCs
953	3.14e-143	0.703171	0.273	0.02	1.05e-138	3	ENSG00000078725	BRINP1	RGCs
954	3.18e-74	0.70089	0.424	0.113	1.07e-69	3	ENSG00000130787	HIP1R	RGCs
955	6.04e-98	0.699794	0.364	0.066	2.03e-93	3	ENSG00000198513	ATL1	RGCs
956	1.09e-76	0.699427	0.366	0.085	3.66e-72	3	ENSG00000165152	TMEM246	RGCs
957	6.75e-69	0.699287	0.561	0.195	2.26e-64	3	ENSG00000099889	ARVCF	RGCs
958	1.68e-96	0.698479	0.366	0.068	5.62e-92	3	ENSG00000136274	NACAD	RGCs
959	6.95e-97	0.697923	0.306	0.047	2.33e-92	3	ENSG00000076344	RGS11	RGCs
960	3.1e-71	0.695715	0.507	0.16	1.04e-66	3	ENSG00000079950	STX7	RGCs
961	3.17e-63	0.692891	0.499	0.171	1.06e-58	3	ENSG00000149485	FADS1	RGCs
962	1.91e-77	0.692559	0.495	0.143	6.4e-73	3	ENSG00000147044	CASK	RGCs
963	4.49e-52	0.692017	0.636	0.291	1.51e-47	3	ENSG00000078668	VDAC3	RGCs
964	5.67e-81	0.690204	0.331	0.066	1.9e-76	3	ENSG00000160469	BRSK1	RGCs
965	2.66e-51	0.689956	0.845	0.516	8.93e-47	3	ENSG00000161203	AP2M1	RGCs
966	3.05e-50	0.688411	0.841	0.533	1.02e-45	3	ENSG00000161960	EIF4A1	RGCs
967	9.26e-76	0.687998	0.398	0.099	3.1e-71	3	ENSG00000139998	RAB15	RGCs
968	4.25e-122	0.687495	0.275	0.027	1.42e-117	3	ENSG00000136531	SCN2A	RGCs
969	3.49e-80	0.687019	0.344	0.073	1.17e-75	3	ENSG00000115756	HPCAL1	RGCs
970	1.24e-63	0.686933	0.53	0.186	4.15e-59	3	ENSG00000006125	AP2B1	RGCs
971	1.12e-55	0.686221	0.607	0.251	3.76e-51	3	ENSG00000120727	PAIP2	RGCs
972	3.17e-65	0.685409	0.954	0.712	1.06e-60	3	ENSG00000080824	HSP90AA1	RGCs
973	1.17e-101	0.684181	0.375	0.068	3.91e-97	3	ENSG00000100473	COCH	RGCs
974	3.08e-51	0.682694	0.754	0.408	1.03e-46	3	ENSG00000143198	MGST3	RGCs
975	2.26e-108	0.681381	0.296	0.038	7.58e-104	3	ENSG00000170959	DCDC1	RGCs
976	2.36e-55	0.681159	0.714	0.339	7.92e-51	3	ENSG00000160752	FDPS	RGCs
977	6.49e-60	0.680945	0.551	0.209	2.18e-55	3	ENSG00000120265	PCMT1	RGCs
978	3.37e-58	0.679023	0.499	0.179	1.13e-53	3	ENSG00000143702	CEP170	RGCs
979	2.52e-97	0.677589	0.379	0.072	8.45e-93	3	ENSG00000141837	CACNA1A	RGCs
980	1.21e-54	0.677426	0.573	0.234	4.06e-50	3	ENSG00000166848	TERF2IP	RGCs
981	9.91e-101	0.676811	0.348	0.059	3.32e-96	3	ENSG00000141526	SLC16A3	RGCs
982	1.33e-113	0.676344	0.317	0.042	4.45e-109	3	ENSG00000155511	GRIA1	RGCs
983	1.72e-65	0.675365	0.607	0.225	5.77e-61	3	ENSG00000004487	KDM1A	RGCs
984	4.53e-55	0.673885	0.594	0.245	1.52e-50	3	ENSG00000141562	NARF	RGCs
985	9e-51	0.671929	0.818	0.474	3.02e-46	3	ENSG00000105568	PPP2R1A	RGCs
986	1.26e-56	0.67153	0.491	0.176	4.21e-52	3	ENSG00000177732	SOX12	RGCs
987	9.57e-52	0.668771	0.867	0.532	3.21e-47	3	ENSG00000182670	TTC3	RGCs
988	4.93e-65	0.668552	0.397	0.113	1.65e-60	3	ENSG00000101290	CDS2	RGCs
989	1.04e-70	0.667727	0.422	0.116	3.5e-66	3	ENSG00000018236	CNTN1	RGCs
990	9.32e-74	0.667518	0.449	0.124	3.13e-69	3	ENSG00000166562	SEC11C	RGCs
991	2.02e-75	0.664677	0.526	0.163	6.76e-71	3	ENSG00000100918	REC8	RGCs
992	1.48e-71	0.662718	0.468	0.138	4.97e-67	3	ENSG00000096092	TMEM14A	RGCs
993	7.04e-62	0.661969	0.967	0.746	2.36e-57	3	ENSG00000263001	GTF2I	RGCs
994	4.55e-53	0.661805	0.884	0.559	1.53e-48	3	ENSG00000167815	PRDX2	RGCs
995	3.98e-74	0.6602	0.412	0.108	1.34e-69	3	ENSG00000125821	DTD1	RGCs
996	2.68e-85	0.660141	0.362	0.075	8.97e-81	3	ENSG00000198794	SCAMP5	RGCs
997	1.79e-65	0.657463	0.433	0.129	6e-61	3	ENSG00000159023	EPB41	RGCs
998	2.45e-48	0.655963	0.774	0.409	8.21e-44	3	ENSG00000130985	UBA1	RGCs
999	3.31e-76	0.655345	0.354	0.081	1.11e-71	3	ENSG00000134323	MYCN	RGCs
1000	1.49e-102	0.65394	0.306	0.044	4.99e-98	3	ENSG00000164061	BSN	RGCs
1001	9.46e-101	0.653333	0.304	0.044	3.17e-96	3	ENSG00000167971	CASKIN1	RGCs
1002	1.86e-65	0.652769	0.362	0.094	6.25e-61	3	ENSG00000149557	FEZ1	RGCs
1003	4.84e-53	0.651681	0.458	0.163	1.62e-48	3	ENSG00000049759	NEDD4L	RGCs
1004	3.58e-65	0.651671	0.408	0.117	1.2e-60	3	ENSG00000158292	GPR153	RGCs
1005	3.24e-88	0.651481	0.319	0.057	1.09e-83	3	ENSG00000120875	DUSP4	RGCs
1006	1.18e-56	0.651312	0.48	0.174	3.95e-52	3	ENSG00000068615	REEP1	RGCs
1007	7.68e-122	0.650279	0.259	0.023	2.57e-117	3	ENSG00000159387	IRX6	RGCs
1008	2.02e-62	0.650049	0.456	0.146	6.77e-58	3	ENSG00000130559	CAMSAP1	RGCs
1009	1.61e-86	0.650017	0.327	0.061	5.41e-82	3	ENSG00000141404	GNAL	RGCs
1010	1.19e-55	0.648827	0.41	0.128	4e-51	3	ENSG00000104427	ZC2HC1A	RGCs
1011	1.95e-62	0.648803	0.368	0.101	6.53e-58	3	ENSG00000155093	PTPRN2	RGCs
1012	2.8e-51	0.648194	0.762	0.394	9.39e-47	3	ENSG00000166136	NDUFB8	RGCs
1013	1.51e-83	0.645959	0.35	0.072	5.05e-79	3	ENSG00000196376	SLC35F1	RGCs
1014	1.82e-60	0.644661	0.515	0.181	6.12e-56	3	ENSG00000091129	NRCAM	RGCs
1015	1.16e-53	0.644268	0.58	0.236	3.91e-49	3	ENSG00000107863	ARHGAP21	RGCs
1016	9.24e-57	0.643891	0.476	0.169	3.1e-52	3	ENSG00000204308	RNF5	RGCs
1017	5.29e-59	0.642737	0.429	0.137	1.77e-54	3	ENSG00000167081	PBX3	RGCs
1018	2.74e-54	0.641209	0.656	0.284	9.18e-50	3	ENSG00000105993	DNAJB6	RGCs
1019	1.69e-63	0.640449	0.371	0.101	5.67e-59	3	ENSG00000134982	APC	RGCs
1020	6.87e-56	0.640222	0.383	0.118	2.3e-51	3	ENSG00000121653	MAPK8IP1	RGCs
1021	2.28e-65	0.640076	0.4	0.112	7.64e-61	3	ENSG00000166974	MAPRE2	RGCs
1022	1.58e-49	0.639857	0.683	0.318	5.3e-45	3	ENSG00000204681	GABBR1	RGCs
1023	6.98e-100	0.637985	0.284	0.038	2.34e-95	3	ENSG00000262484	CCER2	RGCs
1024	2.17e-78	0.636025	0.439	0.115	7.27e-74	3	ENSG00000147155	EBP	RGCs
1025	3.07e-52	0.63289	0.911	0.605	1.03e-47	3	ENSG00000112695	COX7A2	RGCs
1026	1.21e-105	0.632482	0.267	0.031	4.06e-101	3	ENSG00000146005	PSD2	RGCs
1027	4.48e-64	0.631201	0.398	0.112	1.5e-59	3	ENSG00000159363	ATP13A2	RGCs
1028	4.1e-65	0.630426	0.402	0.112	1.37e-60	3	ENSG00000205593	DENND6B	RGCs
1029	1.49e-50	0.630213	0.617	0.269	5e-46	3	ENSG00000137100	DCTN3	RGCs
1030	4.2e-54	0.629897	0.377	0.116	1.41e-49	3	ENSG00000108389	MTMR4	RGCs
1031	5.96e-62	0.628722	0.451	0.14	2e-57	3	ENSG00000143995	MEIS1	RGCs
1032	3.37e-89	0.628702	0.325	0.058	1.13e-84	3	ENSG00000167771	RCOR2	RGCs
1033	1.89e-72	0.628245	0.311	0.066	6.34e-68	3	ENSG00000157193	LRP8	RGCs
1034	1.41e-95	0.627371	0.284	0.04	4.73e-91	3	ENSG00000103723	AP3B2	RGCs
1035	3.46e-124	0.626939	0.255	0.021	1.16e-119	3	ENSG00000089169	RPH3A	RGCs
1036	8.38e-45	0.626619	0.758	0.431	2.81e-40	3	ENSG00000198408	OGA	RGCs
1037	8.43e-67	0.625548	0.354	0.088	2.83e-62	3	ENSG00000161647	MPP3	RGCs
1038	6.82e-90	0.625548	0.259	0.036	2.29e-85	3	ENSG00000148123	PLPPR1	RGCs
1039	3.33e-53	0.625158	0.443	0.152	1.12e-48	3	ENSG00000182093	WRB	RGCs
1040	1.37e-58	0.624374	0.389	0.116	4.59e-54	3	ENSG00000153815	CMIP	RGCs
1041	6.29e-88	0.624023	0.275	0.042	2.11e-83	3	ENSG00000169432	SCN9A	RGCs
1042	3.29e-117	0.622736	0.251	0.023	1.1e-112	3	ENSG00000091010	POU4F3	RGCs
1043	3.63e-103	0.622143	0.294	0.04	1.22e-98	3	ENSG00000151490	PTPRO	RGCs
1044	5.86e-66	0.621713	0.288	0.062	1.97e-61	3	ENSG00000247095	MIR210HG	RGCs
1045	1.39e-58	0.621424	0.364	0.103	4.66e-54	3	ENSG00000139112	GABARAPL1	RGCs
1046	2.28e-54	0.620008	0.561	0.222	7.66e-50	3	ENSG00000115355	CCDC88A	RGCs
1047	1.12e-44	0.618965	0.747	0.405	3.76e-40	3	ENSG00000047849	MAP4	RGCs
1048	2.87e-102	0.617953	0.261	0.031	9.61e-98	3	ENSG00000177181	RIMKLA	RGCs
1049	1.67e-57	0.617422	0.427	0.137	5.61e-53	3	ENSG00000278540	ACACA	RGCs
1050	3.41e-62	0.617294	0.364	0.098	1.14e-57	3	ENSG00000109084	TMEM97	RGCs
1051	1.21e-54	0.617038	0.391	0.122	4.05e-50	3	ENSG00000250510	GPR162	RGCs
1052	4.29e-74	0.616881	0.358	0.083	1.44e-69	3	ENSG00000197535	MYO5A	RGCs
1053	9.13e-63	0.614992	0.988	0.846	3.06e-58	3	ENSG00000134986	NREP	RGCs
1054	1.17e-40	0.614873	0.708	0.385	3.93e-36	3	ENSG00000034713	GABARAPL2	RGCs
1055	6.76e-107	0.614389	0.265	0.03	2.27e-102	3	ENSG00000160326	SLC2A6	RGCs
1056	3.45e-49	0.612147	0.658	0.302	1.16e-44	3	ENSG00000131116	ZNF428	RGCs
1057	7.9e-77	0.612059	0.273	0.047	2.65e-72	3	ENSG00000126950	TMEM35A	RGCs
1058	1.93e-62	0.611443	0.418	0.123	6.49e-58	3	ENSG00000110697	PITPNM1	RGCs
1059	1.11e-41	0.611433	0.586	0.284	3.73e-37	3	ENSG00000264364	DYNLL2	RGCs
1060	1.48e-42	0.61123	0.776	0.444	4.96e-38	3	ENSG00000100320	RBFOX2	RGCs
1061	2.63e-78	0.611005	0.346	0.074	8.82e-74	3	ENSG00000103154	NECAB2	RGCs
1062	5.92e-49	0.61086	0.485	0.187	1.99e-44	3	ENSG00000153395	LPCAT1	RGCs
1063	4.47e-68	0.610853	0.35	0.085	1.5e-63	3	ENSG00000068971	PPP2R5B	RGCs
1064	2.15e-69	0.609542	0.375	0.095	7.21e-65	3	ENSG00000139116	KIF21A	RGCs
1065	1.25e-82	0.608007	0.321	0.061	4.2e-78	3	ENSG00000165443	PHYHIPL	RGCs
1066	2.71e-98	0.607934	0.24	0.027	9.09e-94	3	ENSG00000146006	LRRTM2	RGCs
1067	9e-109	0.607912	0.217	0.017	3.02e-104	3	ENSG00000028277	POU2F2	RGCs
1068	9.88e-88	0.607878	0.255	0.036	3.31e-83	3	ENSG00000104967	NOVA2	RGCs
1069	5.24e-55	0.607544	0.501	0.181	1.76e-50	3	ENSG00000109654	TRIM2	RGCs
1070	4.83e-55	0.605745	0.404	0.129	1.62e-50	3	ENSG00000170873	MTSS1	RGCs
1071	3.66e-101	0.605402	0.244	0.027	1.23e-96	3	ENSG00000105784	RUNDC3B	RGCs
1072	2.87e-97	0.60504	0.279	0.038	9.64e-93	3	ENSG00000153253	SCN3A	RGCs
1073	9.7e-42	0.604092	0.735	0.409	3.25e-37	3	ENSG00000173457	PPP1R14B	RGCs
1074	3.87e-62	0.603492	0.379	0.107	1.3e-57	3	ENSG00000133878	DUSP26	RGCs
1075	2.39e-51	0.603348	0.497	0.188	8e-47	3	ENSG00000163931	TKT	RGCs
1076	6.11e-56	0.603046	0.412	0.131	2.05e-51	3	ENSG00000107643	MAPK8	RGCs
1077	8.3e-51	0.602309	0.677	0.304	2.78e-46	3	ENSG00000111642	CHD4	RGCs
1078	2.9e-99	0.601984	0.221	0.021	9.72e-95	3	ENSG00000106789	CORO2A	RGCs
1079	5.03e-65	0.599904	0.321	0.075	1.69e-60	3	ENSG00000152092	ASTN1	RGCs
1080	3.36e-53	0.59978	0.567	0.224	1.13e-48	3	ENSG00000204843	DCTN1	RGCs
1081	1.13e-55	0.599117	0.426	0.138	3.78e-51	3	ENSG00000167378	IRGQ	RGCs
1082	3.43e-74	0.599034	0.317	0.066	1.15e-69	3	ENSG00000005249	PRKAR2B	RGCs
1083	2.46e-52	0.597959	0.513	0.194	8.26e-48	3	ENSG00000126351	THRA	RGCs
1084	1.94e-47	0.597301	0.611	0.27	6.51e-43	3	ENSG00000157216	SSBP3	RGCs
1085	4.61e-57	0.596798	0.464	0.155	1.55e-52	3	ENSG00000154978	VOPP1	RGCs
1086	3.72e-55	0.596723	0.315	0.084	1.25e-50	3	ENSG00000196233	LCOR	RGCs
1087	8.47e-56	0.596517	0.338	0.095	2.84e-51	3	ENSG00000128923	MINDY2	RGCs
1088	2.98e-47	0.594645	0.592	0.258	1e-42	3	ENSG00000149187	CELF1	RGCs
1089	3.56e-48	0.594135	0.509	0.199	1.19e-43	3	ENSG00000101460	MAP1LC3A	RGCs
1090	1.18e-57	0.592392	0.389	0.116	3.95e-53	3	ENSG00000129682	FGF13	RGCs
1091	2.17e-46	0.592193	0.681	0.33	7.27e-42	3	ENSG00000160097	FNDC5	RGCs
1092	3.35e-92	0.591409	0.242	0.03	1.12e-87	3	ENSG00000058404	CAMK2B	RGCs
1093	7.77e-80	0.591363	0.244	0.036	2.61e-75	3	ENSG00000105278	ZFR2	RGCs
1094	3.06e-93	0.59087	0.219	0.023	1.03e-88	3	ENSG00000166111	SVOP	RGCs
1095	1.82e-60	0.590506	0.398	0.116	6.09e-56	3	ENSG00000140836	ZFHX3	RGCs
1096	4.52e-81	0.590274	0.263	0.042	1.52e-76	3	ENSG00000008056	SYN1	RGCs
1097	1.78e-47	0.588876	0.458	0.172	5.96e-43	3	ENSG00000177868	SVBP	RGCs
1098	2.26e-55	0.588134	0.36	0.105	7.57e-51	3	ENSG00000134030	CTIF	RGCs
1099	2.64e-43	0.587695	0.594	0.273	8.86e-39	3	ENSG00000109736	MFSD10	RGCs
1100	1.18e-45	0.58766	0.344	0.111	3.97e-41	3	ENSG00000196220	SRGAP3	RGCs
1101	3.28e-69	0.587611	0.338	0.078	1.1e-64	3	ENSG00000152154	TMEM178A	RGCs
1102	1.05e-126	0.587362	0.224	0.014	3.52e-122	3	ENSG00000187135	VSTM2B	RGCs
1103	9.55e-95	0.586485	0.236	0.027	3.2e-90	3	ENSG00000155265	GOLGA7B	RGCs
1104	2.44e-55	0.58445	0.356	0.103	8.19e-51	3	ENSG00000066735	KIF26A	RGCs
1105	2.62e-88	0.584377	1	0.939	8.8e-84	3	ENSG00000111640	GAPDH	RGCs
1106	4.82e-56	0.583846	0.375	0.111	1.62e-51	3	ENSG00000128872	TMOD2	RGCs
1107	4.39e-55	0.582322	0.427	0.141	1.47e-50	3	ENSG00000136193	SCRN1	RGCs
1108	1.1e-52	0.581903	0.53	0.201	3.68e-48	3	ENSG00000189180	ZNF33A	RGCs
1109	6.64e-57	0.581645	0.391	0.117	2.23e-52	3	ENSG00000074964	ARHGEF10L	RGCs
1110	8.76e-84	0.580976	0.261	0.04	2.94e-79	3	ENSG00000145242	EPHA5	RGCs
1111	3.42e-52	0.579663	0.445	0.155	1.15e-47	3	ENSG00000170558	CDH2	RGCs
1112	1.25e-107	0.576479	0.224	0.019	4.21e-103	3	ENSG00000152954	NRSN1	RGCs
1113	1.24e-68	0.576279	0.28	0.056	4.17e-64	3	ENSG00000135127	BICDL1	RGCs
1114	5.63e-87	0.575511	0.226	0.027	1.89e-82	3	ENSG00000152128	TMEM163	RGCs
1115	6.48e-46	0.574745	0.592	0.261	2.17e-41	3	ENSG00000276293	PIP4K2B	RGCs
1116	1.69e-51	0.574594	0.402	0.129	5.67e-47	3	ENSG00000162631	NTNG1	RGCs
1117	2.76e-51	0.574353	0.952	0.724	9.27e-47	3	ENSG00000172757	CFL1	RGCs
1118	7.68e-53	0.574336	0.358	0.106	2.57e-48	3	ENSG00000026652	AGPAT4	RGCs
1119	1.9e-56	0.574294	0.439	0.143	6.38e-52	3	ENSG00000142875	PRKACB	RGCs
1120	1.19e-125	0.574016	1	0.992	4.01e-121	3	ENSG00000184009	ACTG1	RGCs
1121	1.27e-80	0.572647	0.226	0.03	4.26e-76	3	ENSG00000152932	RAB3C	RGCs
1122	2.56e-49	0.570983	0.406	0.138	8.6e-45	3	ENSG00000172292	CERS6	RGCs
1123	9.48e-42	0.570927	0.71	0.369	3.18e-37	3	ENSG00000136810	TXN	RGCs
1124	2.73e-93	0.570798	0.265	0.036	9.16e-89	3	ENSG00000114805	PLCH1	RGCs
1125	3.03e-42	0.569642	0.453	0.179	1.02e-37	3	ENSG00000106976	DNM1	RGCs
1126	6.21e-53	0.56922	0.449	0.155	2.08e-48	3	ENSG00000138413	IDH1	RGCs
1127	7.45e-51	0.5687	0.389	0.127	2.5e-46	3	ENSG00000157985	AGAP1	RGCs
1128	9.41e-80	0.568347	0.292	0.052	3.16e-75	3	ENSG00000112137	PHACTR1	RGCs
1129	5.85e-51	0.568011	0.429	0.146	1.96e-46	3	ENSG00000198853	RUSC2	RGCs
1130	2.63e-46	0.567332	0.694	0.336	8.83e-42	3	ENSG00000175203	DCTN2	RGCs
1131	1.49e-47	0.566976	0.476	0.181	4.98e-43	3	ENSG00000173064	HECTD4	RGCs
1132	1.89e-54	0.566404	0.478	0.167	6.34e-50	3	ENSG00000122515	ZMIZ2	RGCs
1133	1.72e-76	0.565866	0.242	0.037	5.77e-72	3	ENSG00000099365	STX1B	RGCs
1134	6.72e-115	0.565518	0.207	0.014	2.25e-110	3	ENSG00000147432	CHRNB3	RGCs
1135	2.23e-43	0.564943	0.592	0.271	7.48e-39	3	ENSG00000178719	GRINA	RGCs
1136	3.43e-57	0.563644	0.323	0.084	1.15e-52	3	ENSG00000114739	ACVR2B	RGCs
1137	2.07e-44	0.563625	0.451	0.174	6.94e-40	3	ENSG00000151729	SLC25A4	RGCs
1138	1.03e-50	0.56325	0.412	0.139	3.46e-46	3	ENSG00000143126	CELSR2	RGCs
1139	3.33e-108	0.563154	0.228	0.02	1.12e-103	3	ENSG00000261292	AC110491.1	RGCs
1140	3.19e-51	0.562395	0.42	0.142	1.07e-46	3	ENSG00000176903	PNMA1	RGCs
1141	6e-72	0.56234	0.236	0.038	2.01e-67	3	ENSG00000171450	CDK5R2	RGCs
1142	1.08e-61	0.56173	0.348	0.091	3.62e-57	3	ENSG00000105808	RASA4	RGCs
1143	6.12e-43	0.561623	0.422	0.158	2.05e-38	3	ENSG00000131149	GSE1	RGCs
1144	9.59e-40	0.561117	0.89	0.612	3.22e-35	3	ENSG00000109046	WSB1	RGCs
1145	6.04e-63	0.560348	0.284	0.061	2.03e-58	3	ENSG00000165323	FAT3	RGCs
1146	5e-44	0.559608	0.433	0.163	1.68e-39	3	ENSG00000120137	PANK3	RGCs
1147	6.89e-96	0.559512	0.221	0.022	2.31e-91	3	ENSG00000181291	TMEM132E	RGCs
1148	1.54e-60	0.558873	0.29	0.066	5.15e-56	3	ENSG00000110881	ASIC1	RGCs
1149	8.39e-76	0.558803	0.251	0.041	2.81e-71	3	ENSG00000236502	SIX3-AS1	RGCs
1150	7.79e-76	0.558415	0.269	0.047	2.61e-71	3	ENSG00000158856	DMTN	RGCs
1151	1.69e-58	0.558272	0.342	0.091	5.68e-54	3	ENSG00000131089	ARHGEF9	RGCs
1152	1.22e-55	0.558006	0.298	0.075	4.09e-51	3	ENSG00000196935	SRGAP1	RGCs
1153	2.88e-56	0.557357	0.418	0.132	9.67e-52	3	ENSG00000185187	SIGIRR	RGCs
1154	1.8e-35	0.556367	0.58	0.288	6.03e-31	3	ENSG00000167770	OTUB1	RGCs
1155	1.48e-69	0.556139	0.298	0.062	4.95e-65	3	ENSG00000075461	CACNG4	RGCs
1156	6.84e-41	0.555586	0.903	0.636	2.3e-36	3	ENSG00000108953	YWHAE	RGCs
1157	1.65e-47	0.555493	0.414	0.143	5.52e-43	3	ENSG00000184985	SORCS2	RGCs
1158	3.72e-73	0.554561	0.251	0.042	1.25e-68	3	ENSG00000116675	DNAJC6	RGCs
1159	3.62e-61	0.554441	0.385	0.108	1.21e-56	3	ENSG00000088854	C20orf194	RGCs
1160	1.16e-43	0.554394	0.342	0.112	3.89e-39	3	ENSG00000149256	TENM4	RGCs
1161	1.66e-44	0.553276	0.596	0.264	5.58e-40	3	ENSG00000092096	SLC22A17	RGCs
1162	1.07e-51	0.55191	0.404	0.132	3.57e-47	3	ENSG00000127663	KDM4B	RGCs
1163	2.62e-74	0.551798	0.253	0.042	8.77e-70	3	ENSG00000171608	PIK3CD	RGCs
1164	1.23e-49	0.550196	0.42	0.144	4.12e-45	3	ENSG00000187634	SAMD11	RGCs
1165	1.21e-39	0.549635	0.681	0.346	4.07e-35	3	ENSG00000179364	PACS2	RGCs
1166	5.34e-41	0.5495	0.658	0.327	1.79e-36	3	ENSG00000007168	PAFAH1B1	RGCs
1167	9.42e-59	0.547477	0.255	0.053	3.16e-54	3	ENSG00000188803	SHISA6	RGCs
1168	2.87e-53	0.547093	0.331	0.092	9.64e-49	3	ENSG00000105737	GRIK5	RGCs
1169	3.62e-53	0.546773	0.321	0.088	1.21e-48	3	ENSG00000128596	CCDC136	RGCs
1170	4.4e-53	0.545816	0.329	0.093	1.48e-48	3	ENSG00000055163	CYFIP2	RGCs
1171	4.8e-81	0.545447	0.271	0.044	1.61e-76	3	ENSG00000155974	GRIP1	RGCs
1172	1.18e-46	0.544215	0.427	0.155	3.96e-42	3	ENSG00000143862	ARL8A	RGCs
1173	3.07e-45	0.543296	0.391	0.135	1.03e-40	3	ENSG00000054654	SYNE2	RGCs
1174	4.97e-50	0.543293	0.435	0.151	1.67e-45	3	ENSG00000099284	H2AFY2	RGCs
1175	6e-49	0.543064	0.397	0.132	2.01e-44	3	ENSG00000196557	CACNA1H	RGCs
1176	4.52e-70	0.542187	0.255	0.045	1.52e-65	3	ENSG00000131242	RAB11FIP4	RGCs
1177	8.75e-70	0.541601	0.221	0.034	2.93e-65	3	ENSG00000107742	SPOCK2	RGCs
1178	1.39e-59	0.541534	0.369	0.102	4.66e-55	3	ENSG00000085365	SCAMP1	RGCs
1179	4.11e-47	0.541485	0.484	0.185	1.38e-42	3	ENSG00000103657	HERC1	RGCs
1180	1.14e-39	0.54118	0.692	0.359	3.82e-35	3	ENSG00000143742	SRP9	RGCs
1181	3.76e-55	0.541074	0.352	0.1	1.26e-50	3	ENSG00000130164	LDLR	RGCs
1182	1.94e-44	0.540981	0.582	0.252	6.52e-40	3	ENSG00000079432	CIC	RGCs
1183	3.02e-48	0.540327	0.429	0.15	1.01e-43	3	ENSG00000163516	ANKZF1	RGCs
1184	3.62e-36	0.539846	0.787	0.466	1.21e-31	3	ENSG00000009307	CSDE1	RGCs
1185	1.44e-39	0.539015	0.679	0.341	4.82e-35	3	ENSG00000128739	SNRPN	RGCs
1186	1.25e-97	0.538347	0.219	0.021	4.2e-93	3	ENSG00000259663	AC010478.1	RGCs
1187	3.79e-39	0.538332	0.542	0.238	1.27e-34	3	ENSG00000133083	DCLK1	RGCs
1188	5.93e-91	0.538295	0.265	0.036	1.99e-86	3	ENSG00000186493	C5orf38	RGCs
1189	1.19e-110	0.538049	0.226	0.019	3.98e-106	3	ENSG00000253457	SMIM18	RGCs
1190	3.06e-40	0.538005	0.462	0.189	1.03e-35	3	ENSG00000010810	FYN	RGCs
1191	4e-74	0.537482	0.197	0.025	1.34e-69	3	ENSG00000135824	RGS8	RGCs
1192	8.1e-48	0.537408	0.424	0.149	2.72e-43	3	ENSG00000134369	NAV1	RGCs
1193	5.28e-56	0.537353	0.337	0.091	1.77e-51	3	ENSG00000091972	CD200	RGCs
1194	1.15e-38	0.537301	0.573	0.275	3.85e-34	3	ENSG00000080845	DLGAP4	RGCs
1195	5.14e-45	0.53634	0.375	0.128	1.72e-40	3	ENSG00000106829	TLE4	RGCs
1196	9.99e-53	0.536128	0.338	0.097	3.35e-48	3	ENSG00000140022	STON2	RGCs
1197	2.61e-55	0.534591	0.253	0.056	8.74e-51	3	ENSG00000152578	GRIA4	RGCs
1198	2.13e-35	0.534173	0.596	0.295	7.13e-31	3	ENSG00000063660	GPC1	RGCs
1199	5.43e-38	0.533422	0.52	0.235	1.82e-33	3	ENSG00000138107	ACTR1A	RGCs
1200	6.13e-64	0.532331	0.275	0.057	2.06e-59	3	ENSG00000136828	RALGPS1	RGCs
1201	5.32e-39	0.532313	0.478	0.203	1.78e-34	3	ENSG00000069329	VPS35	RGCs
1202	1.96e-88	0.531423	0.236	0.029	6.57e-84	3	ENSG00000204624	DISP3	RGCs
1203	2.57e-51	0.531342	0.362	0.111	8.62e-47	3	ENSG00000144635	DYNC1LI1	RGCs
1204	4.34e-51	0.530939	0.354	0.106	1.46e-46	3	ENSG00000079102	RUNX1T1	RGCs
1205	2.19e-45	0.530695	0.346	0.111	7.33e-41	3	ENSG00000166402	TUB	RGCs
1206	2.33e-64	0.530636	0.298	0.066	7.81e-60	3	ENSG00000168772	CXXC4	RGCs
1207	1.31e-59	0.530503	0.325	0.082	4.41e-55	3	ENSG00000117461	PIK3R3	RGCs
1208	7.22e-57	0.529645	0.313	0.079	2.42e-52	3	ENSG00000177508	IRX3	RGCs
1209	2.78e-43	0.528218	0.928	0.744	9.32e-39	3	ENSG00000110321	EIF4G2	RGCs
1210	2.35e-62	0.527975	0.298	0.067	7.89e-58	3	ENSG00000168243	GNG4	RGCs
1211	1.71e-41	0.527541	0.58	0.261	5.75e-37	3	ENSG00000164050	PLXNB1	RGCs
1212	1.62e-82	0.527512	0.219	0.027	5.43e-78	3	ENSG00000091536	MYO15A	RGCs
1213	1.1e-44	0.527036	0.499	0.198	3.68e-40	3	ENSG00000108840	HDAC5	RGCs
1214	1.37e-53	0.526646	0.418	0.136	4.59e-49	3	ENSG00000149809	TM7SF2	RGCs
1215	5.98e-42	0.525451	0.46	0.184	2.01e-37	3	ENSG00000144567	RETREG2	RGCs
1216	2.49e-39	0.525093	0.482	0.203	8.36e-35	3	ENSG00000176973	FAM89B	RGCs
1217	9.04e-39	0.524735	0.464	0.194	3.03e-34	3	ENSG00000257923	CUX1	RGCs
1218	1.13e-43	0.52437	0.524	0.216	3.78e-39	3	ENSG00000167397	VKORC1	RGCs
1219	3.3e-42	0.524138	0.493	0.202	1.11e-37	3	ENSG00000146083	RNF44	RGCs
1220	6.6e-65	0.523704	0.313	0.071	2.21e-60	3	ENSG00000099814	CEP170B	RGCs
1221	2.43e-63	0.523662	0.282	0.06	8.14e-59	3	ENSG00000033327	GAB2	RGCs
1222	6.82e-74	0.523132	0.263	0.045	2.29e-69	3	ENSG00000277363	SRCIN1	RGCs
1223	9.9e-49	0.522598	0.429	0.15	3.32e-44	3	ENSG00000104177	MYEF2	RGCs
1224	5.83e-46	0.522218	0.36	0.117	1.95e-41	3	ENSG00000132510	KDM6B	RGCs
1225	3.33e-68	0.521763	0.24	0.042	1.12e-63	3	ENSG00000127561	SYNGR3	RGCs
1226	5.34e-64	0.521706	0.306	0.069	1.79e-59	3	ENSG00000146555	SDK1	RGCs
1227	1.55e-62	0.521395	0.257	0.051	5.19e-58	3	ENSG00000162873	KLHDC8A	RGCs
1228	2.89e-42	0.521292	0.354	0.12	9.71e-38	3	ENSG00000110931	CAMKK2	RGCs
1229	3.55e-48	0.520931	0.431	0.151	1.19e-43	3	ENSG00000118200	CAMSAP2	RGCs
1230	5.42e-63	0.520515	0.226	0.04	1.82e-58	3	ENSG00000185090	MANEAL	RGCs
1231	3.45e-34	0.519815	0.652	0.354	1.16e-29	3	ENSG00000125971	DYNLRB1	RGCs
1232	2.57e-46	0.519138	0.306	0.09	8.63e-42	3	ENSG00000156587	UBE2L6	RGCs
1233	1.01e-37	0.518378	0.89	0.571	3.39e-33	3	ENSG00000089220	PEBP1	RGCs
1234	4.15e-49	0.518059	0.335	0.1	1.39e-44	3	ENSG00000112290	WASF1	RGCs
1235	4.8e-69	0.51759	0.296	0.061	1.61e-64	3	ENSG00000107518	ATRNL1	RGCs
1236	2.09e-45	0.517391	0.472	0.182	7.02e-41	3	ENSG00000117139	KDM5B	RGCs
1237	8.38e-83	0.517374	0.205	0.023	2.81e-78	3	ENSG00000110786	PTPN5	RGCs
1238	9.61e-77	0.517073	0.219	0.03	3.22e-72	3	ENSG00000164418	GRIK2	RGCs
1239	3.32e-37	0.516661	0.443	0.184	1.11e-32	3	ENSG00000132471	WBP2	RGCs
1240	1.06e-48	0.515512	0.354	0.112	3.54e-44	3	ENSG00000123240	OPTN	RGCs
1241	1.14e-47	0.515125	0.335	0.1	3.82e-43	3	ENSG00000139625	MAP3K12	RGCs
1242	5.22e-48	0.51502	0.422	0.147	1.75e-43	3	ENSG00000180354	MTURN	RGCs
1243	2.31e-64	0.514871	0.251	0.048	7.76e-60	3	ENSG00000143590	EFNA3	RGCs
1244	3.32e-65	0.514537	0.271	0.055	1.11e-60	3	ENSG00000085433	WDR47	RGCs
1245	1.33e-38	0.51451	0.631	0.306	4.46e-34	3	ENSG00000116871	MAP7D1	RGCs
1246	1.61e-41	0.513777	0.476	0.192	5.39e-37	3	ENSG00000087470	DNM1L	RGCs
1247	9.76e-37	0.513248	0.551	0.258	3.27e-32	3	ENSG00000102409	BEX4	RGCs
1248	2.29e-77	0.512787	0.207	0.026	7.69e-73	3	ENSG00000167619	TMEM145	RGCs
1249	2.6e-50	0.512688	0.325	0.092	8.71e-46	3	ENSG00000121966	CXCR4	RGCs
1250	1.4e-73	0.512303	0.234	0.036	4.69e-69	3	ENSG00000175175	PPM1E	RGCs
1251	1.01e-44	0.511671	0.426	0.155	3.39e-40	3	ENSG00000064999	ANKS1A	RGCs
1252	3.36e-40	0.511483	0.371	0.135	1.13e-35	3	ENSG00000138032	PPM1B	RGCs
1253	1.22e-42	0.511421	0.569	0.25	4.08e-38	3	ENSG00000114784	EIF1B	RGCs
1254	1.26e-47	0.511149	0.304	0.085	4.22e-43	3	ENSG00000139636	LMBR1L	RGCs
1255	2.33e-40	0.510993	0.445	0.179	7.8e-36	3	ENSG00000230124	ACBD6	RGCs
1256	1.94e-63	0.510002	0.261	0.052	6.52e-59	3	ENSG00000130226	DPP6	RGCs
1257	4.62e-39	0.50835	0.538	0.238	1.55e-34	3	ENSG00000134779	TPGS2	RGCs
1258	2.48e-51	0.508231	0.329	0.094	8.32e-47	3	ENSG00000160145	KALRN	RGCs
1259	2.57e-41	0.507446	0.296	0.091	8.61e-37	3	ENSG00000125744	RTN2	RGCs
1260	3.59e-45	0.507402	0.344	0.111	1.21e-40	3	ENSG00000128656	CHN1	RGCs
1261	6.08e-53	0.507144	0.275	0.067	2.04e-48	3	ENSG00000141098	GFOD2	RGCs
1262	4.88e-39	0.50713	0.397	0.149	1.64e-34	3	ENSG00000182287	AP1S2	RGCs
1263	1.16e-47	0.507109	0.329	0.099	3.89e-43	3	ENSG00000106537	TSPAN13	RGCs
1264	2.33e-95	0.506688	0.199	0.017	7.82e-91	3	ENSG00000152214	RIT2	RGCs
1265	1.63e-64	0.506086	0.251	0.047	5.47e-60	3	ENSG00000095539	SEMA4G	RGCs
1266	6.16e-59	0.505722	0.273	0.06	2.07e-54	3	ENSG00000050438	SLC4A8	RGCs
1267	2.97e-53	0.50525	0.277	0.068	9.96e-49	3	ENSG00000174721	FGFBP3	RGCs
1268	1.3e-86	0.505054	0.168	0.013	4.34e-82	3	ENSG00000113430	IRX4	RGCs
1269	3.39e-36	0.502983	0.64	0.322	1.14e-31	3	ENSG00000165637	VDAC2	RGCs
1270	2.45e-64	0.502774	0.228	0.039	8.22e-60	3	ENSG00000183092	BEGAIN	RGCs
1271	3.4e-35	0.502432	0.356	0.136	1.14e-30	3	ENSG00000188191	PRKAR1B	RGCs
1272	1.05e-44	0.501942	0.273	0.075	3.52e-40	3	ENSG00000203668	CHML	RGCs
1273	3.09e-49	0.501825	0.3	0.082	1.04e-44	3	ENSG00000105767	CADM4	RGCs
1274	8.12e-42	0.500929	0.292	0.09	2.72e-37	3	ENSG00000131437	KIF3A	RGCs
1275	5.52e-50	0.500772	0.294	0.079	1.85e-45	3	ENSG00000137216	TMEM63B	RGCs
1276	1.08e-34	0.500716	0.449	0.192	3.63e-30	3	ENSG00000100242	SUN2	RGCs
1277	6.72e-50	0.500135	0.369	0.116	2.26e-45	3	ENSG00000119242	CCDC92	RGCs
1278	3.17e-146	1.6103	0.891	0.379	1.06e-141	4	ENSG00000109193	SULT1E1	optic nerve progenitors
1279	7.71e-136	1.59026	0.991	0.666	2.59e-131	4	ENSG00000133110	POSTN	optic nerve progenitors
1280	4.79e-79	1.23337	0.862	0.517	1.61e-74	4	ENSG00000145423	SFRP2	optic nerve progenitors
1281	1.52e-112	1.19574	0.98	0.648	5.11e-108	4	ENSG00000115414	FN1	optic nerve progenitors
1282	2.36e-36	1.17073	0.387	0.158	7.9e-32	4	ENSG00000107796	ACTA2	optic nerve progenitors
1283	4.64e-83	1.16169	0.43	0.106	1.56e-78	4	ENSG00000152785	BMP3	optic nerve progenitors
1284	7.26e-87	1.15369	0.785	0.357	2.43e-82	4	ENSG00000107562	CXCL12	optic nerve progenitors
1285	1.8e-69	1.0919	0.511	0.175	6.03e-65	4	ENSG00000148175	STOM	optic nerve progenitors
1286	7.14e-77	1.08441	0.26	0.04	2.39e-72	4	ENSG00000143546	S100A8	optic nerve progenitors
1287	1.13e-106	1.06545	1	0.956	3.78e-102	4	ENSG00000168542	COL3A1	optic nerve progenitors
1288	1.7e-81	1.06001	0.837	0.407	5.7e-77	4	ENSG00000163359	COL6A3	optic nerve progenitors
1289	6.18e-66	1.02325	0.584	0.222	2.07e-61	4	ENSG00000206384	COL6A6	optic nerve progenitors
1290	3.03e-66	1.01813	0.787	0.422	1.02e-61	4	ENSG00000142089	IFITM3	optic nerve progenitors
1291	2.45e-58	1.00719	0.394	0.121	8.2e-54	4	ENSG00000149591	TAGLN	optic nerve progenitors
1292	3.31e-71	0.981806	0.826	0.438	1.11e-66	4	ENSG00000105894	PTN	optic nerve progenitors
1293	3.31e-62	0.975666	0.656	0.29	1.11e-57	4	ENSG00000162878	PKDCC	optic nerve progenitors
1294	1.08e-54	0.973259	0.679	0.34	3.64e-50	4	ENSG00000163453	IGFBP7	optic nerve progenitors
1295	5.08e-20	0.973117	0.419	0.236	1.71e-15	4	ENSG00000118785	SPP1	optic nerve progenitors
1296	7.66e-26	0.968226	0.611	0.384	2.57e-21	4	ENSG00000213934	HBG1	optic nerve progenitors
1297	1.18e-83	0.96047	0.98	0.725	3.97e-79	4	ENSG00000163430	FSTL1	optic nerve progenitors
1298	7.86e-64	0.941013	0.312	0.07	2.64e-59	4	ENSG00000110799	VWF	optic nerve progenitors
1299	1.3e-63	0.927331	0.511	0.176	4.34e-59	4	ENSG00000187800	PEAR1	optic nerve progenitors
1300	1.63e-53	0.925413	0.559	0.239	5.48e-49	4	ENSG00000099250	NRP1	optic nerve progenitors
1301	6.98e-67	0.90328	0.914	0.578	2.34e-62	4	ENSG00000139329	LUM	optic nerve progenitors
1302	1.05e-34	0.899864	0.416	0.18	3.53e-30	4	ENSG00000129538	RNASE1	optic nerve progenitors
1303	1.42e-35	0.888434	0.398	0.165	4.75e-31	4	ENSG00000106819	ASPN	optic nerve progenitors
1304	1.39e-54	0.881791	0.606	0.258	4.67e-50	4	ENSG00000101825	MXRA5	optic nerve progenitors
1305	2.22e-58	0.848049	0.81	0.44	7.44e-54	4	ENSG00000166710	B2M	optic nerve progenitors
1306	4.02e-51	0.84178	0.376	0.12	1.35e-46	4	ENSG00000101265	RASSF2	optic nerve progenitors
1307	2.42e-53	0.831786	0.541	0.22	8.13e-49	4	ENSG00000131477	RAMP2	optic nerve progenitors
1308	6.02e-47	0.830636	0.756	0.457	2.02e-42	4	ENSG00000038382	TRIO	optic nerve progenitors
1309	7.08e-33	0.823475	0.493	0.249	2.37e-28	4	ENSG00000175899	A2M	optic nerve progenitors
1310	2.43e-42	0.81884	0.423	0.164	8.16e-38	4	ENSG00000101384	JAG1	optic nerve progenitors
1311	1.49e-51	0.816513	0.41	0.133	4.99e-47	4	ENSG00000128606	LRRC17	optic nerve progenitors
1312	3.63e-46	0.806289	0.572	0.274	1.22e-41	4	ENSG00000185551	NR2F2	optic nerve progenitors
1313	2.61e-27	0.805608	0.943	0.814	8.76e-23	4	ENSG00000196565	HBG2	optic nerve progenitors
1314	8.43e-45	0.790644	0.853	0.603	2.83e-40	4	ENSG00000106484	MEST	optic nerve progenitors
1315	7.33e-36	0.774729	0.507	0.238	2.46e-31	4	ENSG00000168477	TNXB	optic nerve progenitors
1316	5.48e-33	0.766128	0.566	0.317	1.84e-28	4	ENSG00000185070	FLRT2	optic nerve progenitors
1317	1.83e-43	0.762509	0.722	0.423	6.15e-39	4	ENSG00000091136	LAMB1	optic nerve progenitors
1318	6.87e-42	0.75864	0.771	0.457	2.3e-37	4	ENSG00000163191	S100A11	optic nerve progenitors
1319	4.71e-33	0.756767	0.443	0.203	1.58e-28	4	ENSG00000135046	ANXA1	optic nerve progenitors
1320	2.63e-41	0.754876	0.602	0.296	8.81e-37	4	ENSG00000163520	FBLN2	optic nerve progenitors
1321	9.59e-37	0.7522	0.425	0.175	3.22e-32	4	ENSG00000123560	PLP1	optic nerve progenitors
1322	3.57e-39	0.748642	0.604	0.311	1.2e-34	4	ENSG00000144857	BOC	optic nerve progenitors
1323	1.01e-36	0.747222	0.704	0.439	3.39e-32	4	ENSG00000187498	COL4A1	optic nerve progenitors
1324	2.22e-30	0.74206	0.568	0.316	7.43e-26	4	ENSG00000265972	TXNIP	optic nerve progenitors
1325	1.11e-52	0.7374	0.876	0.563	3.73e-48	4	ENSG00000106809	OGN	optic nerve progenitors
1326	1.73e-42	0.730053	0.317	0.098	5.82e-38	4	ENSG00000179776	CDH5	optic nerve progenitors
1327	1.18e-37	0.727117	0.267	0.081	3.95e-33	4	ENSG00000151468	CCDC3	optic nerve progenitors
1328	4.81e-37	0.726411	0.667	0.388	1.61e-32	4	ENSG00000131016	AKAP12	optic nerve progenitors
1329	1.25e-39	0.722353	0.484	0.214	4.19e-35	4	ENSG00000129596	CDO1	optic nerve progenitors
1330	2.34e-40	0.719069	0.613	0.299	7.84e-36	4	ENSG00000187955	COL14A1	optic nerve progenitors
1331	1.06e-29	0.714156	0.423	0.194	3.57e-25	4	ENSG00000104368	PLAT	optic nerve progenitors
1332	2.54e-43	0.701694	0.335	0.106	8.52e-39	4	ENSG00000169744	LDB2	optic nerve progenitors
1333	1.27e-25	0.688297	0.511	0.285	4.25e-21	4	ENSG00000175745	NR2F1	optic nerve progenitors
1334	2.82e-34	0.682675	0.629	0.342	9.46e-30	4	ENSG00000104870	FCGRT	optic nerve progenitors
1335	3.92e-51	0.676936	0.921	0.631	1.31e-46	4	ENSG00000142173	COL6A2	optic nerve progenitors
1336	1.19e-32	0.67494	0.197	0.052	3.98e-28	4	ENSG00000197594	ENPP1	optic nerve progenitors
1337	1.7e-25	0.666302	0.471	0.252	5.69e-21	4	ENSG00000172889	EGFL7	optic nerve progenitors
1338	1.85e-29	0.641779	0.324	0.127	6.2e-25	4	ENSG00000146250	PRSS35	optic nerve progenitors
1339	6.81e-32	0.640452	0.679	0.415	2.28e-27	4	ENSG00000141753	IGFBP4	optic nerve progenitors
1340	4.44e-25	0.636497	0.265	0.103	1.49e-20	4	ENSG00000184113	CLDN5	optic nerve progenitors
1341	2.42e-39	0.635543	0.229	0.058	8.11e-35	4	ENSG00000162551	ALPL	optic nerve progenitors
1342	3.98e-37	0.631924	0.851	0.586	1.34e-32	4	ENSG00000002586	CD99	optic nerve progenitors
1343	2.12e-20	0.631172	0.351	0.173	7.1e-16	4	ENSG00000142871	CYR61	optic nerve progenitors
1344	6.35e-25	0.627259	0.305	0.126	2.13e-20	4	ENSG00000169908	TM4SF1	optic nerve progenitors
1345	1.22e-30	0.626777	0.595	0.325	4.1e-26	4	ENSG00000129009	ISLR	optic nerve progenitors
1346	8.57e-39	0.62586	0.21	0.05	2.88e-34	4	ENSG00000163661	PTX3	optic nerve progenitors
1347	5.71e-35	0.62263	0.817	0.521	1.92e-30	4	ENSG00000149257	SERPINH1	optic nerve progenitors
1348	3e-39	0.621361	0.235	0.061	1.01e-34	4	ENSG00000005102	MEOX1	optic nerve progenitors
1349	2.8e-23	0.617443	0.559	0.344	9.39e-19	4	ENSG00000112769	LAMA4	optic nerve progenitors
1350	1.55e-31	0.615939	0.647	0.369	5.21e-27	4	ENSG00000102265	TIMP1	optic nerve progenitors
1351	7.03e-42	0.615427	0.952	0.736	2.36e-37	4	ENSG00000100097	LGALS1	optic nerve progenitors
1352	5.02e-29	0.612604	0.287	0.106	1.68e-24	4	ENSG00000126778	SIX1	optic nerve progenitors
1353	2.56e-51	0.611727	0.973	0.776	8.58e-47	4	ENSG00000011465	DCN	optic nerve progenitors
1354	3.07e-21	0.610598	0.419	0.223	1.03e-16	4	ENSG00000127920	GNG11	optic nerve progenitors
1355	9.61e-31	0.608742	0.346	0.14	3.22e-26	4	ENSG00000162631	NTNG1	optic nerve progenitors
1356	1.41e-29	0.608255	0.466	0.225	4.72e-25	4	ENSG00000125968	ID1	optic nerve progenitors
1357	2.43e-26	0.60647	0.502	0.274	8.16e-22	4	ENSG00000116962	NID1	optic nerve progenitors
1358	9.12e-40	0.602145	0.814	0.491	3.06e-35	4	ENSG00000111341	MGP	optic nerve progenitors
1359	1.13e-31	0.60048	0.213	0.061	3.79e-27	4	ENSG00000003436	TFPI	optic nerve progenitors
1360	6.58e-28	0.59871	0.382	0.168	2.21e-23	4	ENSG00000109861	CTSC	optic nerve progenitors
1361	1.83e-24	0.591523	0.676	0.452	6.14e-20	4	ENSG00000134871	COL4A2	optic nerve progenitors
1362	1.57e-29	0.590941	0.679	0.422	5.28e-25	4	ENSG00000166147	FBN1	optic nerve progenitors
1363	2.92e-28	0.590868	0.253	0.086	9.79e-24	4	ENSG00000116678	LEPR	optic nerve progenitors
1364	8.55e-23	0.587803	0.199	0.067	2.87e-18	4	ENSG00000163220	S100A9	optic nerve progenitors
1365	4.17e-34	0.580078	0.213	0.057	1.4e-29	4	ENSG00000143248	RGS5	optic nerve progenitors
1366	4.19e-18	0.577117	0.597	0.402	1.41e-13	4	ENSG00000182871	COL18A1	optic nerve progenitors
1367	1.16e-39	0.576819	0.864	0.57	3.89e-35	4	ENSG00000204262	COL5A2	optic nerve progenitors
1368	1.84e-28	0.574527	0.226	0.073	6.16e-24	4	ENSG00000149564	ESAM	optic nerve progenitors
1369	2.94e-24	0.57362	0.337	0.15	9.86e-20	4	ENSG00000145685	LHFPL2	optic nerve progenitors
1370	1.54e-22	0.5736	0.385	0.189	5.16e-18	4	ENSG00000118523	CTGF	optic nerve progenitors
1371	1.2e-36	0.572429	0.871	0.571	4.03e-32	4	ENSG00000111799	COL12A1	optic nerve progenitors
1372	1.39e-32	0.567165	0.778	0.489	4.66e-28	4	ENSG00000138829	FBN2	optic nerve progenitors
1373	2.38e-11	0.563604	0.342	0.216	7.99e-07	4	ENSG00000244734	HBB	optic nerve progenitors
1374	5.83e-26	0.561126	0.611	0.382	1.95e-21	4	ENSG00000122786	CALD1	optic nerve progenitors
1375	3.06e-29	0.559682	0.557	0.295	1.03e-24	4	ENSG00000116774	OLFML3	optic nerve progenitors
1376	7.62e-22	0.559207	0.369	0.183	2.55e-17	4	ENSG00000133104	SPART	optic nerve progenitors
1377	1.03e-24	0.556249	0.391	0.187	3.44e-20	4	ENSG00000140937	CDH11	optic nerve progenitors
1378	1.02e-20	0.55174	0.489	0.285	3.43e-16	4	ENSG00000147862	NFIB	optic nerve progenitors
1379	3.3e-24	0.551572	0.371	0.172	1.11e-19	4	ENSG00000163513	TGFBR2	optic nerve progenitors
1380	5.92e-28	0.55119	0.328	0.131	1.99e-23	4	ENSG00000044524	EPHA3	optic nerve progenitors
1381	7.24e-24	0.547212	0.251	0.097	2.43e-19	4	ENSG00000172458	IL17D	optic nerve progenitors
1382	2.97e-48	0.54655	0.145	0.019	9.97e-44	4	ENSG00000145536	ADAMTS16	optic nerve progenitors
1383	1.02e-21	0.545245	0.355	0.17	3.42e-17	4	ENSG00000151617	EDNRA	optic nerve progenitors
1384	2.08e-22	0.543752	0.321	0.145	6.98e-18	4	ENSG00000162745	OLFML2B	optic nerve progenitors
1385	3.93e-41	0.54341	0.12	0.015	1.32e-36	4	ENSG00000156234	CXCL13	optic nerve progenitors
1386	1.55e-21	0.543301	0.575	0.354	5.19e-17	4	ENSG00000074181	NOTCH3	optic nerve progenitors
1387	1.91e-26	0.541396	0.201	0.063	6.39e-22	4	ENSG00000164116	GUCY1A1	optic nerve progenitors
1388	5.63e-21	0.537264	0.333	0.157	1.89e-16	4	ENSG00000136040	PLXNC1	optic nerve progenitors
1389	1.9e-28	0.53529	0.229	0.072	6.38e-24	4	ENSG00000154736	ADAMTS5	optic nerve progenitors
1390	2.07e-28	0.534974	0.581	0.308	6.95e-24	4	ENSG00000011028	MRC2	optic nerve progenitors
1391	6.09e-22	0.532205	0.274	0.114	2.04e-17	4	ENSG00000130429	ARPC1B	optic nerve progenitors
1392	3.63e-31	0.531566	0.247	0.078	1.22e-26	4	ENSG00000069702	TGFBR3	optic nerve progenitors
1393	2.88e-20	0.531414	0.342	0.166	9.65e-16	4	ENSG00000167779	IGFBP6	optic nerve progenitors
1394	2.92e-23	0.530185	0.253	0.097	9.79e-19	4	ENSG00000165757	JCAD	optic nerve progenitors
1395	3.2e-19	0.527893	0.353	0.179	1.07e-14	4	ENSG00000004399	PLXND1	optic nerve progenitors
1396	7.49e-24	0.525186	0.575	0.33	2.51e-19	4	ENSG00000147257	GPC3	optic nerve progenitors
1397	4.17e-20	0.523353	0.222	0.086	1.4e-15	4	ENSG00000010327	STAB1	optic nerve progenitors
1398	6.26e-30	0.52326	0.195	0.054	2.1e-25	4	ENSG00000176435	CLEC14A	optic nerve progenitors
1399	1.22e-18	0.522847	0.448	0.26	4.1e-14	4	ENSG00000159840	ZYX	optic nerve progenitors
1400	8.36e-18	0.521505	0.328	0.169	2.81e-13	4	ENSG00000170345	FOS	optic nerve progenitors
1401	2.57e-30	0.521285	0.774	0.496	8.62e-26	4	ENSG00000084636	COL16A1	optic nerve progenitors
1402	1.42e-21	0.517799	0.301	0.132	4.77e-17	4	ENSG00000177374	HIC1	optic nerve progenitors
1403	1.56e-22	0.515464	0.45	0.236	5.23e-18	4	ENSG00000150687	PRSS23	optic nerve progenitors
1404	8.21e-21	0.515021	0.722	0.523	2.75e-16	4	ENSG00000196924	FLNA	optic nerve progenitors
1405	1.46e-17	0.510913	0.367	0.198	4.89e-13	4	ENSG00000184232	OAF	optic nerve progenitors
1406	6.84e-23	0.509845	0.394	0.191	2.29e-18	4	ENSG00000160932	LY6E	optic nerve progenitors
1407	9.79e-21	0.509338	0.265	0.109	3.28e-16	4	ENSG00000204592	HLA-E	optic nerve progenitors
1408	7.62e-25	0.507187	0.708	0.445	2.56e-20	4	ENSG00000120708	TGFBI	optic nerve progenitors
1409	3.53e-17	0.506598	0.432	0.256	1.18e-12	4	ENSG00000154096	THY1	optic nerve progenitors
1410	2.82e-23	0.505769	0.575	0.34	9.45e-19	4	ENSG00000155366	RHOC	optic nerve progenitors
1411	8.77e-23	0.505696	0.443	0.229	2.94e-18	4	ENSG00000177469	CAVIN1	optic nerve progenitors
1412	3.9e-27	0.505676	0.183	0.052	1.31e-22	4	ENSG00000148848	ADAM12	optic nerve progenitors
1413	5.85e-24	0.504648	0.131	0.032	1.96e-19	4	ENSG00000170323	FABP4	optic nerve progenitors
1414	1.34e-19	0.50384	0.557	0.353	4.5e-15	4	ENSG00000101608	MYL12A	optic nerve progenitors
1415	2.46e-27	0.50276	0.224	0.072	8.24e-23	4	ENSG00000261371	PECAM1	optic nerve progenitors
1416	4.52e-21	0.502715	0.276	0.117	1.52e-16	4	ENSG00000176046	NUPR1	optic nerve progenitors
1417	3.82e-20	0.502154	0.233	0.093	1.28e-15	4	ENSG00000111145	ELK3	optic nerve progenitors
1418	5.93e-21	0.500444	0.742	0.543	1.99e-16	4	ENSG00000197747	S100A10	optic nerve progenitors
1419	1.8e-42	0.500415	0.998	0.919	6.02e-38	4	ENSG00000140264	SERF2	optic nerve progenitors
1420	3.17e-144	2.11014	0.682	0.187	1.06e-139	5	ENSG00000080166	DCT	ocular surface (epithelium, stroma, endothelium)/ciliary margin zone
1421	5.47e-156	2.05123	0.518	0.089	1.83e-151	5	ENSG00000134245	WNT2B	ocular surface (epithelium, stroma, endothelium)/ciliary margin zone
1422	6.6e-87	1.93172	0.586	0.206	2.21e-82	5	ENSG00000160111	CPAMD8	ocular surface (epithelium, stroma, endothelium)/ciliary margin zone
1423	1.48e-200	1.85193	0.436	0.039	4.98e-196	5	ENSG00000143882	ATP6V1C2	ocular surface (epithelium, stroma, endothelium)/ciliary margin zone
1424	4.87e-116	1.83518	0.455	0.091	1.63e-111	5	ENSG00000169507	SLC38A11	ocular surface (epithelium, stroma, endothelium)/ciliary margin zone
1425	2.56e-112	1.79368	0.33	0.045	8.6e-108	5	ENSG00000145824	CXCL14	ocular surface (epithelium, stroma, endothelium)/ciliary margin zone
1426	1.12e-101	1.79348	0.781	0.341	3.77e-97	5	ENSG00000185664	PMEL	ocular surface (epithelium, stroma, endothelium)/ciliary margin zone
1427	8.47e-126	1.72884	0.287	0.026	2.84e-121	5	ENSG00000128422	KRT17	ocular surface (epithelium, stroma, endothelium)/ciliary margin zone
1428	9.37e-85	1.72681	0.68	0.3	3.14e-80	5	ENSG00000152661	GJA1	ocular surface (epithelium, stroma, endothelium)/ciliary margin zone
1429	6.64e-93	1.7216	0.617	0.213	2.23e-88	5	ENSG00000083067	TRPM3	ocular surface (epithelium, stroma, endothelium)/ciliary margin zone
1430	2.64e-120	1.60592	0.376	0.055	8.86e-116	5	ENSG00000122691	TWIST1	ocular surface (epithelium, stroma, endothelium)/ciliary margin zone
1431	3.58e-161	1.58933	0.386	0.04	1.2e-156	5	ENSG00000105825	TFPI2	ocular surface (epithelium, stroma, endothelium)/ciliary margin zone
1432	1.59e-91	1.48329	0.282	0.039	5.34e-87	5	ENSG00000171345	KRT19	ocular surface (epithelium, stroma, endothelium)/ciliary margin zone
1433	1.54e-81	1.45367	0.46	0.126	5.18e-77	5	ENSG00000049089	COL9A2	ocular surface (epithelium, stroma, endothelium)/ciliary margin zone
1434	1.07e-107	1.39876	0.28	0.031	3.58e-103	5	ENSG00000103175	WFDC1	ocular surface (epithelium, stroma, endothelium)/ciliary margin zone
1435	1.01e-95	1.38656	0.349	0.061	3.39e-91	5	ENSG00000154856	APCDD1	ocular surface (epithelium, stroma, endothelium)/ciliary margin zone
1436	2.87e-35	1.37397	0.829	0.73	9.62e-31	5	ENSG00000130635	COL5A1	ocular surface (epithelium, stroma, endothelium)/ciliary margin zone
1437	7.98e-56	1.2786	0.506	0.204	2.67e-51	5	ENSG00000164093	PITX2	ocular surface (epithelium, stroma, endothelium)/ciliary margin zone
1438	1.78e-109	1.25638	0.337	0.047	5.97e-105	5	ENSG00000181234	TMEM132C	ocular surface (epithelium, stroma, endothelium)/ciliary margin zone
1439	2.56e-76	1.22746	0.306	0.057	8.57e-72	5	ENSG00000233608	TWIST2	ocular surface (epithelium, stroma, endothelium)/ciliary margin zone
1440	6.65e-76	1.21815	0.166	0.014	2.23e-71	5	ENSG00000149021	SCGB1A1	ocular surface (epithelium, stroma, endothelium)/ciliary margin zone
1441	3.17e-57	1.21283	0.761	0.466	1.06e-52	5	ENSG00000117318	ID3	ocular surface (epithelium, stroma, endothelium)/ciliary margin zone
1442	7.05e-49	1.19475	0.414	0.152	2.36e-44	5	ENSG00000183798	EMILIN3	ocular surface (epithelium, stroma, endothelium)/ciliary margin zone
1443	1.67e-81	1.18369	0.455	0.121	5.61e-77	5	ENSG00000162591	MEGF6	ocular surface (epithelium, stroma, endothelium)/ciliary margin zone
1444	3.09e-42	1.14491	0.834	0.641	1.04e-37	5	ENSG00000142173	COL6A2	ocular surface (epithelium, stroma, endothelium)/ciliary margin zone
1445	7.26e-70	1.14455	0.284	0.054	2.43e-65	5	ENSG00000008196	TFAP2B	ocular surface (epithelium, stroma, endothelium)/ciliary margin zone
1446	3.55e-58	1.13078	0.335	0.088	1.19e-53	5	ENSG00000134160	TRPM1	ocular surface (epithelium, stroma, endothelium)/ciliary margin zone
1447	3.26e-76	1.08231	0.419	0.107	1.09e-71	5	ENSG00000092068	SLC7A8	ocular surface (epithelium, stroma, endothelium)/ciliary margin zone
1448	2.74e-55	1.05338	0.289	0.071	9.18e-51	5	ENSG00000086696	HSD17B2	ocular surface (epithelium, stroma, endothelium)/ciliary margin zone
1449	8.44e-50	1.0383	0.304	0.082	2.83e-45	5	ENSG00000077498	TYR	ocular surface (epithelium, stroma, endothelium)/ciliary margin zone
1450	1.23e-56	1.01793	0.46	0.156	4.14e-52	5	ENSG00000165092	ALDH1A1	ocular surface (epithelium, stroma, endothelium)/ciliary margin zone
1451	1.63e-59	1.01677	0.337	0.088	5.48e-55	5	ENSG00000068078	FGFR3	ocular surface (epithelium, stroma, endothelium)/ciliary margin zone
1452	2.57e-45	1.01421	0.337	0.109	8.6e-41	5	ENSG00000103064	SLC7A6	ocular surface (epithelium, stroma, endothelium)/ciliary margin zone
1453	3.43e-17	1.01052	0.725	0.598	1.15e-12	5	ENSG00000139329	LUM	ocular surface (epithelium, stroma, endothelium)/ciliary margin zone
1454	1.63e-54	0.999488	0.27	0.06	5.47e-50	5	ENSG00000170891	CYTL1	ocular surface (epithelium, stroma, endothelium)/ciliary margin zone
1455	1.83e-24	0.949243	0.393	0.198	6.12e-20	5	ENSG00000113296	THBS4	ocular surface (epithelium, stroma, endothelium)/ciliary margin zone
1456	3.48e-33	0.943128	0.369	0.153	1.17e-28	5	ENSG00000215612	HMX1	ocular surface (epithelium, stroma, endothelium)/ciliary margin zone
1457	2.43e-34	0.935875	0.263	0.085	8.16e-30	5	ENSG00000118515	SGK1	ocular surface (epithelium, stroma, endothelium)/ciliary margin zone
1458	1.13e-78	0.932376	0.841	0.564	3.8e-74	5	ENSG00000100053	CRYBB3	ocular surface (epithelium, stroma, endothelium)/ciliary margin zone
1459	9.42e-40	0.930829	0.602	0.324	3.16e-35	5	ENSG00000117394	SLC2A1	ocular surface (epithelium, stroma, endothelium)/ciliary margin zone
1460	4.81e-43	0.923441	0.263	0.069	1.61e-38	5	ENSG00000164694	FNDC1	ocular surface (epithelium, stroma, endothelium)/ciliary margin zone
1461	8.85e-57	0.92335	0.135	0.013	2.97e-52	5	ENSG00000170477	KRT4	ocular surface (epithelium, stroma, endothelium)/ciliary margin zone
1462	6.22e-30	0.921346	0.448	0.235	2.09e-25	5	ENSG00000168003	SLC3A2	ocular surface (epithelium, stroma, endothelium)/ciliary margin zone
1463	2.83e-28	0.920661	0.251	0.088	9.48e-24	5	ENSG00000114270	COL7A1	ocular surface (epithelium, stroma, endothelium)/ciliary margin zone
1464	1.37e-31	0.910192	0.487	0.252	4.59e-27	5	ENSG00000113721	PDGFRB	ocular surface (epithelium, stroma, endothelium)/ciliary margin zone
1465	3.42e-45	0.899339	0.178	0.032	1.15e-40	5	ENSG00000139330	KERA	ocular surface (epithelium, stroma, endothelium)/ciliary margin zone
1466	2.11e-61	0.89336	0.246	0.045	7.07e-57	5	ENSG00000145506	NKD2	ocular surface (epithelium, stroma, endothelium)/ciliary margin zone
1467	9.79e-39	0.892161	0.32	0.108	3.28e-34	5	ENSG00000160801	PTH1R	ocular surface (epithelium, stroma, endothelium)/ciliary margin zone
1468	5.33e-87	0.891277	0.942	0.771	1.79e-82	5	ENSG00000100122	CRYBB1	ocular surface (epithelium, stroma, endothelium)/ciliary margin zone
1469	2.83e-42	0.890504	0.32	0.103	9.5e-38	5	ENSG00000066468	FGFR2	ocular surface (epithelium, stroma, endothelium)/ciliary margin zone
1470	2.88e-51	0.888035	0.28	0.067	9.66e-47	5	ENSG00000170421	KRT8	ocular surface (epithelium, stroma, endothelium)/ciliary margin zone
1471	7.74e-39	0.875743	0.296	0.094	2.6e-34	5	ENSG00000003989	SLC7A2	ocular surface (epithelium, stroma, endothelium)/ciliary margin zone
1472	1.15e-33	0.863866	0.573	0.324	3.86e-29	5	ENSG00000020181	ADGRA2	ocular surface (epithelium, stroma, endothelium)/ciliary margin zone
1473	5.86e-26	0.844953	0.99	0.979	1.97e-21	5	ENSG00000108821	COL1A1	ocular surface (epithelium, stroma, endothelium)/ciliary margin zone
1474	2.22e-33	0.84439	0.566	0.311	7.46e-29	5	ENSG00000077782	FGFR1	ocular surface (epithelium, stroma, endothelium)/ciliary margin zone
1475	5.4e-72	0.844272	0.133	0.008	1.81e-67	5	ENSG00000188770	OPTC	ocular surface (epithelium, stroma, endothelium)/ciliary margin zone
1476	8.64e-29	0.84035	0.622	0.401	2.9e-24	5	ENSG00000182871	COL18A1	ocular surface (epithelium, stroma, endothelium)/ciliary margin zone
1477	2.56e-31	0.83803	0.33	0.13	8.59e-27	5	ENSG00000163331	DAPL1	ocular surface (epithelium, stroma, endothelium)/ciliary margin zone
1478	1.23e-37	0.821916	0.282	0.087	4.11e-33	5	ENSG00000158270	COLEC12	ocular surface (epithelium, stroma, endothelium)/ciliary margin zone
1479	1.9e-30	0.814344	0.282	0.103	6.38e-26	5	ENSG00000103257	SLC7A5	ocular surface (epithelium, stroma, endothelium)/ciliary margin zone
1480	1.02e-21	0.808896	0.335	0.163	3.43e-17	5	ENSG00000064309	CDON	ocular surface (epithelium, stroma, endothelium)/ciliary margin zone
1481	6.07e-39	0.807837	0.74	0.472	2.04e-34	5	ENSG00000117122	MFAP2	ocular surface (epithelium, stroma, endothelium)/ciliary margin zone
1482	1.25e-25	0.80044	0.482	0.278	4.18e-21	5	ENSG00000164050	PLXNB1	ocular surface (epithelium, stroma, endothelium)/ciliary margin zone
1483	5.83e-44	0.791919	0.113	0.012	1.96e-39	5	ENSG00000171401	KRT13	ocular surface (epithelium, stroma, endothelium)/ciliary margin zone
1484	3.09e-22	0.780538	0.477	0.291	1.03e-17	5	ENSG00000101198	NKAIN4	ocular surface (epithelium, stroma, endothelium)/ciliary margin zone
1485	2.39e-32	0.780151	0.889	0.77	8.01e-28	5	ENSG00000142156	COL6A1	ocular surface (epithelium, stroma, endothelium)/ciliary margin zone
1486	9.3e-23	0.773681	0.272	0.115	3.12e-18	5	ENSG00000183036	PCP4	ocular surface (epithelium, stroma, endothelium)/ciliary margin zone
1487	8.32e-25	0.772181	0.345	0.16	2.79e-20	5	ENSG00000105472	CLEC11A	ocular surface (epithelium, stroma, endothelium)/ciliary margin zone
1488	2.71e-71	0.771694	0.875	0.68	9.1e-67	5	ENSG00000196431	CRYBA4	ocular surface (epithelium, stroma, endothelium)/ciliary margin zone
1489	5.2e-22	0.771547	0.412	0.223	1.75e-17	5	ENSG00000064666	CNN2	ocular surface (epithelium, stroma, endothelium)/ciliary margin zone
1490	8.87e-14	0.769735	0.378	0.238	2.97e-09	5	ENSG00000189056	RELN	ocular surface (epithelium, stroma, endothelium)/ciliary margin zone
1491	1.07e-22	0.761292	0.489	0.288	3.58e-18	5	ENSG00000175745	NR2F1	ocular surface (epithelium, stroma, endothelium)/ciliary margin zone
1492	8.02e-24	0.753684	0.424	0.223	2.69e-19	5	ENSG00000127920	GNG11	ocular surface (epithelium, stroma, endothelium)/ciliary margin zone
1493	5.55e-27	0.74651	0.499	0.275	1.86e-22	5	ENSG00000166033	HTRA1	ocular surface (epithelium, stroma, endothelium)/ciliary margin zone
1494	1.56e-22	0.745255	0.306	0.136	5.25e-18	5	ENSG00000149451	ADAM33	ocular surface (epithelium, stroma, endothelium)/ciliary margin zone
1495	1.35e-20	0.737336	0.296	0.139	4.54e-16	5	ENSG00000107736	CDH23	ocular surface (epithelium, stroma, endothelium)/ciliary margin zone
1496	2.55e-33	0.736316	0.205	0.054	8.54e-29	5	ENSG00000153404	PLEKHG4B	ocular surface (epithelium, stroma, endothelium)/ciliary margin zone
1497	5.29e-24	0.733375	0.255	0.1	1.77e-19	5	ENSG00000157873	TNFRSF14	ocular surface (epithelium, stroma, endothelium)/ciliary margin zone
1498	2.73e-10	0.730268	0.658	0.591	9.16e-06	5	ENSG00000204262	COL5A2	ocular surface (epithelium, stroma, endothelium)/ciliary margin zone
1499	1.46e-25	0.727987	0.639	0.435	4.89e-21	5	ENSG00000135916	ITM2C	ocular surface (epithelium, stroma, endothelium)/ciliary margin zone
1500	2.03e-14	0.726056	0.2	0.091	6.79e-10	5	ENSG00000100473	COCH	ocular surface (epithelium, stroma, endothelium)/ciliary margin zone
1501	3.11e-27	0.723155	0.429	0.209	1.04e-22	5	ENSG00000092758	COL9A3	ocular surface (epithelium, stroma, endothelium)/ciliary margin zone
1502	2.11e-46	0.72239	0.125	0.014	7.09e-42	5	ENSG00000186081	KRT5	ocular surface (epithelium, stroma, endothelium)/ciliary margin zone
1503	3.9e-24	0.719301	0.275	0.112	1.31e-19	5	ENSG00000165655	ZNF503	ocular surface (epithelium, stroma, endothelium)/ciliary margin zone
1504	1.99e-21	0.716461	0.383	0.194	6.68e-17	5	ENSG00000186340	THBS2	ocular surface (epithelium, stroma, endothelium)/ciliary margin zone
1505	2.99e-54	0.713414	0.195	0.031	1e-49	5	ENSG00000115507	OTX1	ocular surface (epithelium, stroma, endothelium)/ciliary margin zone
1506	1.55e-18	0.710737	0.345	0.178	5.18e-14	5	ENSG00000189184	PCDH18	ocular surface (epithelium, stroma, endothelium)/ciliary margin zone
1507	1.89e-26	0.709562	0.711	0.497	6.35e-22	5	ENSG00000138829	FBN2	ocular surface (epithelium, stroma, endothelium)/ciliary margin zone
1508	3.34e-67	0.707896	0.181	0.02	1.12e-62	5	ENSG00000120215	MLANA	ocular surface (epithelium, stroma, endothelium)/ciliary margin zone
1509	3.95e-19	0.70064	0.306	0.151	1.32e-14	5	ENSG00000112655	PTK7	ocular surface (epithelium, stroma, endothelium)/ciliary margin zone
1510	1.01e-22	0.698719	0.354	0.173	3.37e-18	5	ENSG00000130702	LAMA5	ocular surface (epithelium, stroma, endothelium)/ciliary margin zone
1511	2.44e-27	0.698605	0.439	0.22	8.19e-23	5	ENSG00000112280	COL9A1	ocular surface (epithelium, stroma, endothelium)/ciliary margin zone
1512	3.28e-31	0.698145	0.21	0.059	1.1e-26	5	ENSG00000113805	CNTN3	ocular surface (epithelium, stroma, endothelium)/ciliary margin zone
1513	1.45e-31	0.696935	0.195	0.052	4.87e-27	5	ENSG00000188505	NCCRP1	ocular surface (epithelium, stroma, endothelium)/ciliary margin zone
1514	5.46e-14	0.69687	0.282	0.152	1.83e-09	5	ENSG00000158747	NBL1	ocular surface (epithelium, stroma, endothelium)/ciliary margin zone
1515	2.73e-27	0.694149	0.595	0.342	9.15e-23	5	ENSG00000007372	PAX6	ocular surface (epithelium, stroma, endothelium)/ciliary margin zone
1516	3.6e-49	0.691373	0.935	0.826	1.21e-44	5	ENSG00000110492	MDK	ocular surface (epithelium, stroma, endothelium)/ciliary margin zone
1517	7.26e-76	0.689296	0.733	0.393	2.43e-71	5	ENSG00000163254	CRYGC	ocular surface (epithelium, stroma, endothelium)/ciliary margin zone
1518	2e-52	0.683556	0.188	0.03	6.72e-48	5	ENSG00000121898	CPXM2	ocular surface (epithelium, stroma, endothelium)/ciliary margin zone
1519	1.47e-28	0.682959	0.441	0.212	4.91e-24	5	ENSG00000100968	NFATC4	ocular surface (epithelium, stroma, endothelium)/ciliary margin zone
1520	1.26e-65	0.682602	0.655	0.311	4.22e-61	5	ENSG00000145692	BHMT	ocular surface (epithelium, stroma, endothelium)/ciliary margin zone
1521	3.51e-32	0.681189	0.212	0.058	1.18e-27	5	ENSG00000197565	COL4A6	ocular surface (epithelium, stroma, endothelium)/ciliary margin zone
1522	2.65e-24	0.679193	0.788	0.668	8.89e-20	5	ENSG00000136156	ITM2B	ocular surface (epithelium, stroma, endothelium)/ciliary margin zone
1523	1.45e-71	0.672331	0.771	0.438	4.87e-67	5	ENSG00000163499	CRYBA2	ocular surface (epithelium, stroma, endothelium)/ciliary margin zone
1524	1.81e-22	0.670928	0.995	0.975	6.08e-18	5	ENSG00000164692	COL1A2	ocular surface (epithelium, stroma, endothelium)/ciliary margin zone
1525	7.25e-18	0.668372	0.219	0.092	2.43e-13	5	ENSG00000103154	NECAB2	ocular surface (epithelium, stroma, endothelium)/ciliary margin zone
1526	3.03e-15	0.665978	0.508	0.364	1.02e-10	5	ENSG00000105655	ISYNA1	ocular surface (epithelium, stroma, endothelium)/ciliary margin zone
1527	1.58e-28	0.649062	0.443	0.208	5.28e-24	5	ENSG00000196154	S100A4	ocular surface (epithelium, stroma, endothelium)/ciliary margin zone
1528	9.51e-26	0.648925	0.186	0.055	3.19e-21	5	ENSG00000111057	KRT18	ocular surface (epithelium, stroma, endothelium)/ciliary margin zone
1529	2.75e-18	0.64724	0.672	0.507	9.22e-14	5	ENSG00000084636	COL16A1	ocular surface (epithelium, stroma, endothelium)/ciliary margin zone
1530	3.04e-79	0.641694	0.93	0.763	1.02e-74	5	ENSG00000109846	CRYAB	ocular surface (epithelium, stroma, endothelium)/ciliary margin zone
1531	2.46e-19	0.641371	0.263	0.116	8.25e-15	5	ENSG00000115884	SDC1	ocular surface (epithelium, stroma, endothelium)/ciliary margin zone
1532	3.47e-16	0.638379	0.306	0.159	1.17e-11	5	ENSG00000162496	DHRS3	ocular surface (epithelium, stroma, endothelium)/ciliary margin zone
1533	2.15e-16	0.636311	0.477	0.318	7.19e-12	5	ENSG00000173598	NUDT4	ocular surface (epithelium, stroma, endothelium)/ciliary margin zone
1534	1.36e-19	0.630882	0.569	0.385	4.58e-15	5	ENSG00000152518	ZFP36L2	ocular surface (epithelium, stroma, endothelium)/ciliary margin zone
1535	8.97e-24	0.630212	0.186	0.058	3.01e-19	5	ENSG00000240583	AQP1	ocular surface (epithelium, stroma, endothelium)/ciliary margin zone
1536	5.1e-25	0.629767	0.267	0.101	1.71e-20	5	ENSG00000107165	TYRP1	ocular surface (epithelium, stroma, endothelium)/ciliary margin zone
1537	1.41e-15	0.626045	0.32	0.175	4.74e-11	5	ENSG00000115738	ID2	ocular surface (epithelium, stroma, endothelium)/ciliary margin zone
1538	8.26e-18	0.623043	0.299	0.146	2.77e-13	5	ENSG00000155363	MOV10	ocular surface (epithelium, stroma, endothelium)/ciliary margin zone
1539	9.08e-25	0.61851	0.222	0.076	3.05e-20	5	ENSG00000182612	TSPAN10	ocular surface (epithelium, stroma, endothelium)/ciliary margin zone
1540	1.85e-20	0.618202	0.648	0.461	6.22e-16	5	ENSG00000172037	LAMB2	ocular surface (epithelium, stroma, endothelium)/ciliary margin zone
1541	4.92e-24	0.618005	0.301	0.126	1.65e-19	5	ENSG00000060656	PTPRU	ocular surface (epithelium, stroma, endothelium)/ciliary margin zone
1542	1.02e-85	0.61379	0.94	0.758	3.42e-81	5	ENSG00000108255	CRYBA1	ocular surface (epithelium, stroma, endothelium)/ciliary margin zone
1543	3.98e-21	0.609298	0.325	0.152	1.34e-16	5	ENSG00000188153	COL4A5	ocular surface (epithelium, stroma, endothelium)/ciliary margin zone
1544	1.35e-17	0.608434	0.347	0.189	4.53e-13	5	ENSG00000164904	ALDH7A1	ocular surface (epithelium, stroma, endothelium)/ciliary margin zone
1545	2.64e-17	0.607863	0.407	0.232	8.85e-13	5	ENSG00000125968	ID1	ocular surface (epithelium, stroma, endothelium)/ciliary margin zone
1546	9.65e-20	0.605525	0.566	0.384	3.23e-15	5	ENSG00000137497	NUMA1	ocular surface (epithelium, stroma, endothelium)/ciliary margin zone
1547	3.32e-14	0.604189	0.537	0.392	1.11e-09	5	ENSG00000120885	CLU	ocular surface (epithelium, stroma, endothelium)/ciliary margin zone
1548	5.56e-22	0.600776	0.311	0.14	1.87e-17	5	ENSG00000001617	SEMA3F	ocular surface (epithelium, stroma, endothelium)/ciliary margin zone
1549	1.08e-16	0.599561	0.34	0.184	3.63e-12	5	ENSG00000150938	CRIM1	ocular surface (epithelium, stroma, endothelium)/ciliary margin zone
1550	8.47e-43	0.598072	0.14	0.02	2.84e-38	5	ENSG00000136944	LMX1B	ocular surface (epithelium, stroma, endothelium)/ciliary margin zone
1551	9.13e-19	0.596941	0.2	0.076	3.06e-14	5	ENSG00000006283	CACNA1G	ocular surface (epithelium, stroma, endothelium)/ciliary margin zone
1552	1.75e-16	0.59551	0.617	0.465	5.87e-12	5	ENSG00000132780	NASP	ocular surface (epithelium, stroma, endothelium)/ciliary margin zone
1553	5.08e-20	0.595008	0.684	0.528	1.7e-15	5	ENSG00000196924	FLNA	ocular surface (epithelium, stroma, endothelium)/ciliary margin zone
1554	3.84e-42	0.593502	0.106	0.011	1.29e-37	5	ENSG00000131480	AOC2	ocular surface (epithelium, stroma, endothelium)/ciliary margin zone
1555	4.67e-16	0.59339	0.467	0.3	1.57e-11	5	ENSG00000182492	BGN	ocular surface (epithelium, stroma, endothelium)/ciliary margin zone
1556	1.24e-18	0.589842	0.549	0.368	4.15e-14	5	ENSG00000149212	SESN3	ocular surface (epithelium, stroma, endothelium)/ciliary margin zone
1557	3.3e-15	0.58849	0.378	0.23	1.11e-10	5	ENSG00000170581	STAT2	ocular surface (epithelium, stroma, endothelium)/ciliary margin zone
1558	2.06e-56	0.587714	0.123	0.01	6.92e-52	5	ENSG00000166558	SLC38A8	ocular surface (epithelium, stroma, endothelium)/ciliary margin zone
1559	2.2e-24	0.586111	0.169	0.049	7.39e-20	5	ENSG00000140807	NKD1	ocular surface (epithelium, stroma, endothelium)/ciliary margin zone
1560	9.24e-15	0.585904	0.516	0.361	3.1e-10	5	ENSG00000106624	AEBP1	ocular surface (epithelium, stroma, endothelium)/ciliary margin zone
1561	1.96e-13	0.585515	0.357	0.218	6.58e-09	5	ENSG00000133639	BTG1	ocular surface (epithelium, stroma, endothelium)/ciliary margin zone
1562	8.33e-12	0.584461	0.299	0.178	2.79e-07	5	ENSG00000110721	CHKA	ocular surface (epithelium, stroma, endothelium)/ciliary margin zone
1563	3.22e-11	0.578991	0.301	0.184	1.08e-06	5	ENSG00000125772	GPCPD1	ocular surface (epithelium, stroma, endothelium)/ciliary margin zone
1564	1.63e-15	0.571987	0.39	0.227	5.47e-11	5	ENSG00000128602	SMO	ocular surface (epithelium, stroma, endothelium)/ciliary margin zone
1565	5.16e-14	0.569637	0.234	0.113	1.73e-09	5	ENSG00000155011	DKK2	ocular surface (epithelium, stroma, endothelium)/ciliary margin zone
1566	1.76e-18	0.568996	0.222	0.091	5.89e-14	5	ENSG00000123243	ITIH5	ocular surface (epithelium, stroma, endothelium)/ciliary margin zone
1567	2e-24	0.567649	0.81	0.658	6.69e-20	5	ENSG00000084207	GSTP1	ocular surface (epithelium, stroma, endothelium)/ciliary margin zone
1568	6.3e-22	0.56749	0.236	0.09	2.11e-17	5	ENSG00000090530	P3H2	ocular surface (epithelium, stroma, endothelium)/ciliary margin zone
1569	1.18e-15	0.564148	0.133	0.044	3.96e-11	5	ENSG00000166825	ANPEP	ocular surface (epithelium, stroma, endothelium)/ciliary margin zone
1570	8.47e-12	0.564056	0.239	0.129	2.84e-07	5	ENSG00000164638	SLC29A4	ocular surface (epithelium, stroma, endothelium)/ciliary margin zone
1571	3.18e-12	0.556865	0.304	0.175	1.06e-07	5	ENSG00000134438	RAX	ocular surface (epithelium, stroma, endothelium)/ciliary margin zone
1572	8.11e-14	0.556122	0.299	0.163	2.72e-09	5	ENSG00000137868	STRA6	ocular surface (epithelium, stroma, endothelium)/ciliary margin zone
1573	1.15e-13	0.554445	0.219	0.106	3.86e-09	5	ENSG00000101333	PLCB4	ocular surface (epithelium, stroma, endothelium)/ciliary margin zone
1574	5.22e-16	0.552469	0.581	0.424	1.75e-11	5	ENSG00000102804	TSC22D1	ocular surface (epithelium, stroma, endothelium)/ciliary margin zone
1575	5.83e-33	0.548834	0.147	0.029	1.95e-28	5	ENSG00000205403	CFI	ocular surface (epithelium, stroma, endothelium)/ciliary margin zone
1576	7.57e-13	0.548397	0.311	0.177	2.54e-08	5	ENSG00000082781	ITGB5	ocular surface (epithelium, stroma, endothelium)/ciliary margin zone
1577	3.25e-17	0.546854	0.316	0.16	1.09e-12	5	ENSG00000196739	COL27A1	ocular surface (epithelium, stroma, endothelium)/ciliary margin zone
1578	5.54e-14	0.545199	0.607	0.47	1.86e-09	5	ENSG00000178252	WDR6	ocular surface (epithelium, stroma, endothelium)/ciliary margin zone
1579	3.81e-09	0.543504	0.316	0.21	0.000127639	5	ENSG00000144749	LRIG1	ocular surface (epithelium, stroma, endothelium)/ciliary margin zone
1580	8.36e-19	0.539795	0.769	0.63	2.8e-14	5	ENSG00000109046	WSB1	ocular surface (epithelium, stroma, endothelium)/ciliary margin zone
1581	4.06e-78	0.539733	0.935	0.772	1.36e-73	5	ENSG00000244752	CRYBB2	ocular surface (epithelium, stroma, endothelium)/ciliary margin zone
1582	8.57e-15	0.538082	0.152	0.057	2.88e-10	5	ENSG00000198756	COLGALT2	ocular surface (epithelium, stroma, endothelium)/ciliary margin zone
1583	7.54e-15	0.537219	0.265	0.132	2.53e-10	5	ENSG00000135069	PSAT1	ocular surface (epithelium, stroma, endothelium)/ciliary margin zone
1584	9.32e-28	0.536794	0.913	0.803	3.13e-23	5	ENSG00000100201	DDX17	ocular surface (epithelium, stroma, endothelium)/ciliary margin zone
1585	2.25e-23	0.535936	0.128	0.03	7.56e-19	5	ENSG00000081479	LRP2	ocular surface (epithelium, stroma, endothelium)/ciliary margin zone
1586	1.88e-17	0.53123	0.152	0.051	6.31e-13	5	ENSG00000137273	FOXF2	ocular surface (epithelium, stroma, endothelium)/ciliary margin zone
1587	1.11e-10	0.531132	0.296	0.182	3.74e-06	5	ENSG00000171298	GAA	ocular surface (epithelium, stroma, endothelium)/ciliary margin zone
1588	1.31e-18	0.530331	0.677	0.514	4.39e-14	5	ENSG00000104852	SNRNP70	ocular surface (epithelium, stroma, endothelium)/ciliary margin zone
1589	8.28e-13	0.529029	0.33	0.191	2.78e-08	5	ENSG00000171812	COL8A2	ocular surface (epithelium, stroma, endothelium)/ciliary margin zone
1590	1.37e-30	0.528828	0.325	0.121	4.59e-26	5	ENSG00000105370	LIM2	ocular surface (epithelium, stroma, endothelium)/ciliary margin zone
1591	2.68e-13	0.526897	0.241	0.122	8.98e-09	5	ENSG00000158966	CACHD1	ocular surface (epithelium, stroma, endothelium)/ciliary margin zone
1592	3.92e-13	0.525795	0.205	0.097	1.31e-08	5	ENSG00000088881	EBF4	ocular surface (epithelium, stroma, endothelium)/ciliary margin zone
1593	1.14e-10	0.525681	0.398	0.274	3.81e-06	5	ENSG00000088882	CPXM1	ocular surface (epithelium, stroma, endothelium)/ciliary margin zone
1594	1.52e-40	0.524607	0.147	0.023	5.09e-36	5	ENSG00000123892	RAB38	ocular surface (epithelium, stroma, endothelium)/ciliary margin zone
1595	5.44e-13	0.522575	0.205	0.095	1.82e-08	5	ENSG00000123094	RASSF8	ocular surface (epithelium, stroma, endothelium)/ciliary margin zone
1596	1.78e-14	0.522252	0.405	0.251	5.95e-10	5	ENSG00000100842	EFS	ocular surface (epithelium, stroma, endothelium)/ciliary margin zone
1597	3.74e-16	0.521657	0.335	0.178	1.26e-11	5	ENSG00000162998	FRZB	ocular surface (epithelium, stroma, endothelium)/ciliary margin zone
1598	3.02e-12	0.520358	0.263	0.144	1.01e-07	5	ENSG00000215788	TNFRSF25	ocular surface (epithelium, stroma, endothelium)/ciliary margin zone
1599	1.32e-11	0.52032	0.236	0.127	4.44e-07	5	ENSG00000149256	TENM4	ocular surface (epithelium, stroma, endothelium)/ciliary margin zone
1600	7.27e-48	0.519851	0.125	0.013	2.44e-43	5	ENSG00000224958	PGM5-AS1	ocular surface (epithelium, stroma, endothelium)/ciliary margin zone
1601	4.73e-17	0.515618	0.178	0.067	1.59e-12	5	ENSG00000146072	TNFRSF21	ocular surface (epithelium, stroma, endothelium)/ciliary margin zone
1602	1.3e-18	0.513672	0.159	0.053	4.35e-14	5	ENSG00000064692	SNCAIP	ocular surface (epithelium, stroma, endothelium)/ciliary margin zone
1603	3.72e-11	0.512336	0.284	0.164	1.25e-06	5	ENSG00000166949	SMAD3	ocular surface (epithelium, stroma, endothelium)/ciliary margin zone
1604	6.99e-11	0.511655	0.212	0.11	2.34e-06	5	ENSG00000160963	COL26A1	ocular surface (epithelium, stroma, endothelium)/ciliary margin zone
1605	2.47e-22	0.511573	0.149	0.041	8.27e-18	5	ENSG00000167157	PRRX2	ocular surface (epithelium, stroma, endothelium)/ciliary margin zone
1606	1.44e-13	0.507575	0.316	0.176	4.84e-09	5	ENSG00000109861	CTSC	ocular surface (epithelium, stroma, endothelium)/ciliary margin zone
1607	2.12e-16	0.506647	0.231	0.1	7.11e-12	5	ENSG00000135517	MIP	ocular surface (epithelium, stroma, endothelium)/ciliary margin zone
1608	1.56e-16	0.506156	0.54	0.355	5.24e-12	5	ENSG00000163453	IGFBP7	ocular surface (epithelium, stroma, endothelium)/ciliary margin zone
1609	5.84e-10	0.505995	0.453	0.337	1.96e-05	5	ENSG00000130382	MLLT1	ocular surface (epithelium, stroma, endothelium)/ciliary margin zone
1610	5.87e-23	0.504648	0.142	0.037	1.97e-18	5	ENSG00000135063	FAM189A2	ocular surface (epithelium, stroma, endothelium)/ciliary margin zone
1611	9.41e-11	0.504631	0.441	0.314	3.16e-06	5	ENSG00000138080	EMILIN1	ocular surface (epithelium, stroma, endothelium)/ciliary margin zone
1612	1.19e-12	0.503683	0.345	0.205	3.98e-08	5	ENSG00000122176	FMOD	ocular surface (epithelium, stroma, endothelium)/ciliary margin zone
1613	1.52e-13	0.50367	0.173	0.073	5.1e-09	5	ENSG00000196372	ASB13	ocular surface (epithelium, stroma, endothelium)/ciliary margin zone
1614	4.03e-12	0.503449	0.554	0.426	1.35e-07	5	ENSG00000170004	CHD3	ocular surface (epithelium, stroma, endothelium)/ciliary margin zone
1615	2.42e-12	0.500869	0.496	0.349	8.13e-08	5	ENSG00000083444	PLOD1	ocular surface (epithelium, stroma, endothelium)/ciliary margin zone
1616	3.39e-38	0.500584	0.118	0.016	1.14e-33	5	ENSG00000241158	ADAMTS9-AS1	ocular surface (epithelium, stroma, endothelium)/ciliary margin zone
1617	1.22e-14	0.500246	0.59	0.438	4.09e-10	5	ENSG00000011304	PTBP1	ocular surface (epithelium, stroma, endothelium)/ciliary margin zone
1618	1.28e-36	2.21816	0.28	0.071	4.3e-32	6	ENSG00000281508	AL078639.1	dying RGCs
1619	5.36e-18	1.64451	0.624	0.457	1.8e-13	6	ENSG00000269028	MTRNR2L12	dying RGCs
1620	0.000328933	1.33702	0.801	0.846	1	6	ENSG00000188536	HBA2	dying RGCs
1621	7.1e-10	1.33037	0.609	0.663	2.38e-05	6	ENSG00000065978	YBX1	dying RGCs
1622	1.41e-05	0.979276	0.225	0.143	0.472396	6	ENSG00000123200	ZC3H13	dying RGCs
1623	2.12e-09	0.935717	0.79	0.921	7.11e-05	6	ENSG00000172809	RPL38	dying RGCs
1624	1.71e-10	0.929075	0.882	0.959	5.73e-06	6	ENSG00000198918	RPL39	dying RGCs
1625	7.08e-08	0.880133	0.882	0.986	0.00237426	6	ENSG00000138326	RPS24	dying RGCs
1626	0.00175263	0.859672	0.613	0.688	1	6	ENSG00000070756	PABPC1	dying RGCs
1627	4.55e-12	0.804245	0.919	0.984	1.53e-07	6	ENSG00000213741	RPS29	dying RGCs
1628	1.24e-08	0.783911	0.852	0.964	0.000416671	6	ENSG00000171858	RPS21	dying RGCs
1629	5.74e-10	0.775988	0.801	0.836	1.93e-05	6	ENSG00000198888	MT-ND1	dying RGCs
1630	2.18e-06	0.773297	0.24	0.143	0.0732162	6	ENSG00000198162	MAN1A2	dying RGCs
1631	5.94e-08	0.768839	0.952	0.995	0.00199056	6	ENSG00000197756	RPL37A	dying RGCs
1632	1.16e-12	0.765561	0.9	0.983	3.9e-08	6	ENSG00000167996	FTH1	dying RGCs
1633	1.53e-08	0.763037	0.601	0.522	0.000513303	6	ENSG00000104435	STMN2	dying RGCs
1634	4.67e-05	0.738171	0.295	0.205	1	6	ENSG00000135447	PPP1R1A	dying RGCs
1635	5.19e-08	0.737806	0.882	0.972	0.00173994	6	ENSG00000110700	RPS13	dying RGCs
1636	6.44e-23	0.724701	0.919	0.978	2.16e-18	6	ENSG00000198938	MT-CO3	dying RGCs
1637	9.09e-05	0.719976	0.908	0.993	1	6	ENSG00000144713	RPL32	dying RGCs
1638	3.88e-09	0.711917	0.889	0.982	0.000130195	6	ENSG00000177600	RPLP2	dying RGCs
1639	0.00505668	0.692059	0.55	0.637	1	6	ENSG00000240972	MIF	dying RGCs
1640	0.000550053	0.689419	0.904	0.989	1	6	ENSG00000145592	RPL37	dying RGCs
1641	1.54e-11	0.677098	0.852	0.933	5.17e-07	6	ENSG00000198886	MT-ND4	dying RGCs
1642	7.85e-05	0.676512	0.579	0.565	1	6	ENSG00000131711	MAP1B	dying RGCs
1643	7.35e-11	0.674582	0.849	0.891	2.47e-06	6	ENSG00000198840	MT-ND3	dying RGCs
1644	9.53e-11	0.661554	0.97	0.995	3.2e-06	6	ENSG00000177954	RPS27	dying RGCs
1645	1.48e-13	0.658764	0.878	0.955	4.97e-09	6	ENSG00000198899	MT-ATP6	dying RGCs
1646	0.00692654	0.641176	0.14	0.093	1	6	ENSG00000183570	PCBP3	dying RGCs
1647	0.00705036	0.630895	0.421	0.38	1	6	ENSG00000243449	C4orf48	dying RGCs
1648	8.84e-06	0.625066	0.849	0.968	0.296312	6	ENSG00000197958	RPL12	dying RGCs
1649	1.96e-08	0.623999	0.86	0.973	0.000657295	6	ENSG00000156482	RPL30	dying RGCs
1650	8.89e-10	0.617413	0.934	0.995	2.98e-05	6	ENSG00000109475	RPL34	dying RGCs
1651	0.000115332	0.613474	0.188	0.114	1	6	ENSG00000256618	MTRNR2L1	dying RGCs
1652	8.64e-05	0.611689	0.871	0.974	1	6	ENSG00000161970	RPL26	dying RGCs
1653	3.22e-06	0.6056	0.793	0.893	0.108059	6	ENSG00000135486	HNRNPA1	dying RGCs
1654	9.44e-08	0.60483	0.893	0.983	0.0031669	6	ENSG00000105640	RPL18A	dying RGCs
1655	1.03e-11	0.592046	0.775	0.896	3.44e-07	6	ENSG00000124172	ATP5F1E	dying RGCs
1656	1.69e-06	0.589082	0.827	0.932	0.0567727	6	ENSG00000166441	RPL27A	dying RGCs
1657	1.28e-13	0.576076	0.919	0.969	4.29e-09	6	ENSG00000198804	MT-CO1	dying RGCs
1658	0.00249687	0.57105	0.1	0.171	1	6	ENSG00000163110	PDLIM5	dying RGCs
1659	3.55e-08	0.56525	0.871	0.978	0.00118946	6	ENSG00000182899	RPL35A	dying RGCs
1660	7.33e-15	0.560795	0.852	0.951	2.46e-10	6	ENSG00000111640	GAPDH	dying RGCs
1661	3.76e-07	0.559567	0.173	0.085	0.0126233	6	ENSG00000228253	MT-ATP8	dying RGCs
1662	2.4e-05	0.555662	0.17	0.095	0.804065	6	ENSG00000255823	MTRNR2L8	dying RGCs
1663	0.00697172	0.550641	0.188	0.132	1	6	ENSG00000124194	GDAP1L1	dying RGCs
1664	2.94e-07	0.548845	0.856	0.97	0.00985927	6	ENSG00000071082	RPL31	dying RGCs
1665	3.13e-09	0.539556	0.83	0.951	0.000104838	6	ENSG00000087086	FTL	dying RGCs
1666	5.19e-11	0.537467	0.886	0.981	1.74e-06	6	ENSG00000164587	RPS14	dying RGCs
1667	1.73e-08	0.535777	0.889	0.976	0.000580304	6	ENSG00000142534	RPS11	dying RGCs
1668	5.55e-08	0.529934	0.875	0.978	0.0018604	6	ENSG00000233927	RPS28	dying RGCs
1669	9.82e-07	0.525842	0.86	0.957	0.0329336	6	ENSG00000114391	RPL24	dying RGCs
1670	1.15e-119	2.449	0.892	0.366	3.85e-115	7	ENSG00000225783	MIAT	late RPCs
1671	1.32e-125	2.03269	0.97	0.699	4.41e-121	7	ENSG00000166165	CKB	late RPCs
1672	5.95e-68	1.88199	0.619	0.236	1.99e-63	7	ENSG00000144485	HES6	late RPCs
1673	1.83e-56	1.80016	0.608	0.241	6.14e-52	7	ENSG00000184144	CNTN2	late RPCs
1674	1.78e-61	1.76373	0.552	0.186	5.97e-57	7	ENSG00000073670	ADAM11	late RPCs
1675	6.13e-90	1.75597	0.336	0.045	2.06e-85	7	ENSG00000139445	FOXN4	late RPCs
1676	6.28e-69	1.74025	0.545	0.165	2.1e-64	7	ENSG00000134438	RAX	late RPCs
1677	8.82e-60	1.63624	0.485	0.146	2.96e-55	7	ENSG00000253230	LINC00599	late RPCs
1678	1e-63	1.62265	0.81	0.487	3.36e-59	7	ENSG00000090097	PCBP4	late RPCs
1679	2.7e-95	1.60938	0.993	0.772	9.04e-91	7	ENSG00000166426	CRABP1	late RPCs
1680	5.65e-49	1.52906	0.545	0.217	1.9e-44	7	ENSG00000259439	LINC01833	late RPCs
1681	4.87e-45	1.42858	0.437	0.144	1.63e-40	7	ENSG00000197921	HES5	late RPCs
1682	7.56e-44	1.41783	0.325	0.082	2.54e-39	7	ENSG00000177133	LINC00982	late RPCs
1683	8.88e-36	1.38431	0.418	0.157	2.98e-31	7	ENSG00000215612	HMX1	late RPCs
1684	1.11e-49	1.38123	0.284	0.056	3.71e-45	7	ENSG00000258498	DIO3OS	late RPCs
1685	9.64e-39	1.31196	0.369	0.116	3.23e-34	7	ENSG00000043355	ZIC2	late RPCs
1686	7.63e-46	1.29999	0.28	0.059	2.56e-41	7	ENSG00000179774	ATOH7	late RPCs
1687	2.84e-37	1.28047	0.466	0.186	9.52e-33	7	ENSG00000121068	TBX2	late RPCs
1688	8.58e-30	1.2789	0.313	0.104	2.88e-25	7	ENSG00000124920	MYRF	late RPCs
1689	1.75e-41	1.25323	0.403	0.125	5.86e-37	7	ENSG00000165588	OTX2	late RPCs
1690	3.52e-30	1.1938	0.642	0.397	1.18e-25	7	ENSG00000110092	CCND1	late RPCs
1691	8.75e-18	1.18368	0.414	0.228	2.94e-13	7	ENSG00000160111	CPAMD8	late RPCs
1692	2.06e-46	1.18	0.272	0.055	6.91e-42	7	ENSG00000119614	VSX2	late RPCs
1693	3.28e-34	1.17647	0.313	0.094	1.1e-29	7	ENSG00000170893	TRH	late RPCs
1694	3.71e-21	1.16885	0.571	0.39	1.24e-16	7	ENSG00000108465	CDK5RAP3	late RPCs
1695	4.35e-25	1.16141	0.425	0.2	1.46e-20	7	ENSG00000205213	LGR4	late RPCs
1696	1.16e-34	1.15588	0.653	0.363	3.88e-30	7	ENSG00000185664	PMEL	late RPCs
1697	4.05e-18	1.14702	0.444	0.259	1.36e-13	7	ENSG00000004777	ARHGAP33	late RPCs
1698	2.58e-26	1.10734	0.205	0.052	8.65e-22	7	ENSG00000198400	NTRK1	late RPCs
1699	7.29e-21	1.10726	0.56	0.366	2.45e-16	7	ENSG00000131584	ACAP3	late RPCs
1700	3.67e-19	1.09462	0.343	0.162	1.23e-14	7	ENSG00000135097	MSI1	late RPCs
1701	4.59e-19	1.09077	0.474	0.275	1.54e-14	7	ENSG00000114315	HES1	late RPCs
1702	3.55e-19	1.08628	0.507	0.313	1.19e-14	7	ENSG00000160953	MUM1	late RPCs
1703	2.47e-15	1.08609	0.366	0.199	8.29e-11	7	ENSG00000212694	LINC01089	late RPCs
1704	2.5e-21	1.08244	0.257	0.091	8.37e-17	7	ENSG00000262877	AC110285.2	late RPCs
1705	8.3e-29	1.07303	0.302	0.1	2.78e-24	7	ENSG00000159409	CELF3	late RPCs
1706	3.96e-29	1.06385	0.608	0.35	1.33e-24	7	ENSG00000007372	PAX6	late RPCs
1707	1.55e-23	1.04731	0.358	0.148	5.19e-19	7	ENSG00000167614	TTYH1	late RPCs
1708	3.03e-33	1.0392	0.187	0.036	1.02e-28	7	ENSG00000136883	KIF12	late RPCs
1709	5.66e-21	1.03744	0.332	0.145	1.9e-16	7	ENSG00000110697	PITPNM1	late RPCs
1710	6.07e-14	1.03689	0.291	0.139	2.03e-09	7	ENSG00000163331	DAPL1	late RPCs
1711	1.73e-50	1.02652	0.91	0.669	5.81e-46	7	ENSG00000137285	TUBB2B	late RPCs
1712	5.04e-25	1.02616	0.272	0.089	1.69e-20	7	ENSG00000163251	FZD5	late RPCs
1713	1e-25	1.01132	0.19	0.046	3.37e-21	7	ENSG00000272449	AL139246.5	late RPCs
1714	1.7e-19	1.0092	0.276	0.106	5.69e-15	7	ENSG00000167995	BEST1	late RPCs
1715	1.21e-12	1.00377	0.384	0.237	4.06e-08	7	ENSG00000153944	MSI2	late RPCs
1716	2.96e-17	0.994986	0.451	0.262	9.92e-13	7	ENSG00000138083	SIX3	late RPCs
1717	3.36e-15	0.982547	0.627	0.523	1.13e-10	7	ENSG00000104852	SNRNP70	late RPCs
1718	3.53e-27	0.978451	0.291	0.094	1.18e-22	7	ENSG00000184302	SIX6	late RPCs
1719	1.5e-17	0.977192	0.291	0.124	5.04e-13	7	ENSG00000165646	SLC18A2	late RPCs
1720	7.56e-17	0.963656	0.519	0.335	2.54e-12	7	ENSG00000204580	DDR1	late RPCs
1721	1.09e-15	0.961884	0.59	0.472	3.66e-11	7	ENSG00000132780	NASP	late RPCs
1722	3.02e-21	0.960367	0.269	0.098	1.01e-16	7	ENSG00000085552	IGSF9	late RPCs
1723	6.19e-16	0.957936	0.257	0.107	2.07e-11	7	ENSG00000107317	PTGDS	late RPCs
1724	1.17e-19	0.956579	0.269	0.1	3.93e-15	7	ENSG00000134160	TRPM1	late RPCs
1725	1.06e-20	0.950899	0.31	0.126	3.55e-16	7	ENSG00000170091	NSG2	late RPCs
1726	1.49e-17	0.950566	0.545	0.367	5e-13	7	ENSG00000105655	ISYNA1	late RPCs
1727	1.96e-15	0.950499	0.362	0.193	6.56e-11	7	ENSG00000100918	REC8	late RPCs
1728	6.57e-16	0.94366	0.362	0.184	2.2e-11	7	ENSG00000144834	TAGLN3	late RPCs
1729	8.2e-12	0.93911	0.31	0.167	2.75e-07	7	ENSG00000137868	STRA6	late RPCs
1730	9.56e-20	0.925285	0.459	0.236	3.21e-15	7	ENSG00000083067	TRPM3	late RPCs
1731	1.08e-16	0.91684	0.474	0.285	3.64e-12	7	ENSG00000164050	PLXNB1	late RPCs
1732	1.73e-18	0.914971	0.321	0.143	5.81e-14	7	ENSG00000080644	CHRNA3	late RPCs
1733	2.32e-14	0.914767	0.381	0.215	7.79e-10	7	ENSG00000148400	NOTCH1	late RPCs
1734	1.56e-20	0.906248	0.679	0.532	5.23e-16	7	ENSG00000203879	GDI1	late RPCs
1735	2.67e-17	0.90307	0.34	0.163	8.94e-13	7	ENSG00000180660	MAB21L1	late RPCs
1736	8.81e-19	0.899721	0.257	0.097	2.95e-14	7	ENSG00000011347	SYT7	late RPCs
1737	7.73e-27	0.898742	0.25	0.073	2.59e-22	7	ENSG00000267280	TBX2-AS1	late RPCs
1738	3.15e-14	0.89832	0.201	0.077	1.06e-09	7	ENSG00000050767	COL23A1	late RPCs
1739	3e-19	0.896288	0.634	0.473	1.01e-14	7	ENSG00000178252	WDR6	late RPCs
1740	1.02e-14	0.891918	0.672	0.569	3.44e-10	7	ENSG00000221978	CCNL2	late RPCs
1741	1.15e-22	0.891235	0.634	0.395	3.85e-18	7	ENSG00000135406	PRPH	late RPCs
1742	1.24e-10	0.890064	0.239	0.119	4.15e-06	7	ENSG00000177679	SRRM3	late RPCs
1743	5.21e-17	0.877552	0.295	0.128	1.75e-12	7	ENSG00000198963	RORB	late RPCs
1744	5.35e-24	0.876532	0.567	0.299	1.8e-19	7	ENSG00000130558	OLFM1	late RPCs
1745	1.17e-09	0.873795	0.272	0.156	3.91e-05	7	ENSG00000169660	HEXDC	late RPCs
1746	2.62e-17	0.871383	0.325	0.151	8.78e-13	7	ENSG00000105613	MAST1	late RPCs
1747	8.59e-12	0.870401	0.399	0.256	2.88e-07	7	ENSG00000064547	LPAR2	late RPCs
1748	7.82e-10	0.870223	0.384	0.258	2.62e-05	7	ENSG00000100842	EFS	late RPCs
1749	3.54e-21	0.866119	0.231	0.075	1.19e-16	7	ENSG00000162992	NEUROD1	late RPCs
1750	1.24e-16	0.865493	0.53	0.337	4.16e-12	7	ENSG00000117394	SLC2A1	late RPCs
1751	9.63e-09	0.863	0.343	0.228	0.000322826	7	ENSG00000099889	ARVCF	late RPCs
1752	5.1e-07	0.85762	0.332	0.244	0.0171153	7	ENSG00000188290	HES4	late RPCs
1753	4.21e-14	0.853547	0.541	0.392	1.41e-09	7	ENSG00000152518	ZFP36L2	late RPCs
1754	1.37e-12	0.848816	0.507	0.373	4.6e-08	7	ENSG00000064607	SUGP2	late RPCs
1755	2.34e-15	0.848065	0.306	0.144	7.84e-11	7	ENSG00000187122	SLIT1	late RPCs
1756	8.97e-22	0.846454	0.731	0.574	3.01e-17	7	ENSG00000164032	H2AFZ	late RPCs
1757	3.85e-17	0.839029	0.239	0.092	1.29e-12	7	ENSG00000090932	DLL3	late RPCs
1758	2.28e-17	0.838683	0.205	0.071	7.66e-13	7	ENSG00000225177	AL590617.2	late RPCs
1759	1.42e-19	0.834479	0.623	0.423	4.78e-15	7	ENSG00000072832	CRMP1	late RPCs
1760	7.49e-11	0.834127	0.451	0.323	2.51e-06	7	ENSG00000167615	LENG8	late RPCs
1761	2.67e-17	0.833584	0.582	0.385	8.96e-13	7	ENSG00000112972	HMGCS1	late RPCs
1762	7.38e-16	0.831521	0.444	0.25	2.48e-11	7	ENSG00000171533	MAP6	late RPCs
1763	7.43e-10	0.829005	0.496	0.394	2.49e-05	7	ENSG00000168906	MAT2A	late RPCs
1764	9.1e-09	0.825699	0.299	0.183	0.000305081	7	ENSG00000104885	DOT1L	late RPCs
1765	1.41e-10	0.824348	0.414	0.285	4.73e-06	7	ENSG00000171604	CXXC5	late RPCs
1766	7.49e-17	0.82052	0.153	0.043	2.51e-12	7	ENSG00000188687	SLC4A5	late RPCs
1767	3.6e-12	0.813182	0.493	0.354	1.21e-07	7	ENSG00000100836	PABPN1	late RPCs
1768	1.07e-07	0.812526	0.381	0.277	0.00360155	7	ENSG00000090238	YPEL3	late RPCs
1769	2.86e-12	0.810083	0.291	0.151	9.59e-08	7	ENSG00000166582	CENPV	late RPCs
1770	5.5e-22	0.809056	0.157	0.037	1.85e-17	7	ENSG00000134376	CRB1	late RPCs
1771	1.34e-14	0.807873	0.601	0.462	4.49e-10	7	ENSG00000100650	SRSF5	late RPCs
1772	1.81e-08	0.803409	0.485	0.391	0.000606805	7	ENSG00000130511	SSBP4	late RPCs
1773	3.58e-13	0.798858	0.224	0.096	1.2e-08	7	ENSG00000103154	NECAB2	late RPCs
1774	1.04e-16	0.798706	0.69	0.547	3.47e-12	7	ENSG00000196405	EVL	late RPCs
1775	7.35e-10	0.798047	0.336	0.209	2.46e-05	7	ENSG00000185504	FAAP100	late RPCs
1776	2.51e-10	0.797086	0.175	0.075	8.41e-06	7	ENSG00000139767	SRRM4	late RPCs
1777	5.44e-15	0.793684	0.679	0.586	1.83e-10	7	ENSG00000167978	SRRM2	late RPCs
1778	5.37e-11	0.792031	0.541	0.421	1.8e-06	7	ENSG00000241973	PI4KA	late RPCs
1779	5.12e-12	0.786241	0.254	0.123	1.72e-07	7	ENSG00000066735	KIF26A	late RPCs
1780	5.79e-16	0.786068	0.213	0.079	1.94e-11	7	ENSG00000116717	GADD45A	late RPCs
1781	0.000549466	0.786032	0.299	0.238	1	7	ENSG00000172932	ANKRD13D	late RPCs
1782	1.04e-12	0.784252	0.25	0.115	3.5e-08	7	ENSG00000254377	MIR124-2HG	late RPCs
1783	1.21e-09	0.783775	0.466	0.349	4.05e-05	7	ENSG00000100941	PNN	late RPCs
1784	1.83e-12	0.782648	0.414	0.249	6.14e-08	7	ENSG00000157851	DPYSL5	late RPCs
1785	3.66e-10	0.780733	0.313	0.182	1.23e-05	7	ENSG00000213420	GPC2	late RPCs
1786	1.28e-07	0.777742	0.377	0.272	0.00427713	7	ENSG00000135596	MICAL1	late RPCs
1787	2.25e-13	0.776322	0.619	0.507	7.55e-09	7	ENSG00000108848	LUC7L3	late RPCs
1788	6.57e-07	0.772192	0.265	0.17	0.0220356	7	ENSG00000165804	ZNF219	late RPCs
1789	1.31e-12	0.771536	0.246	0.115	4.38e-08	7	ENSG00000140022	STON2	late RPCs
1790	1.49e-08	0.770663	0.392	0.278	0.000499441	7	ENSG00000130294	KIF1A	late RPCs
1791	1.15e-08	0.76949	0.306	0.188	0.000386985	7	ENSG00000034053	APBA2	late RPCs
1792	2.08e-06	0.768855	0.261	0.169	0.069606	7	ENSG00000187634	SAMD11	late RPCs
1793	5.68e-07	0.766886	0.358	0.26	0.0190478	7	ENSG00000196123	KIAA0895L	late RPCs
1794	2.53e-10	0.761585	0.287	0.161	8.49e-06	7	ENSG00000143126	CELSR2	late RPCs
1795	3.36e-09	0.760891	0.261	0.145	0.000112681	7	ENSG00000106070	GRB10	late RPCs
1796	1.31e-10	0.760368	0.414	0.282	4.4e-06	7	ENSG00000134686	PHC2	late RPCs
1797	8.25e-11	0.760021	0.504	0.373	2.77e-06	7	ENSG00000176887	SOX11	late RPCs
1798	3.95e-45	0.757623	0.974	0.955	1.32e-40	7	ENSG00000167552	TUBA1A	late RPCs
1799	2.32e-07	0.757202	0.366	0.262	0.0077797	7	ENSG00000164104	HMGB2	late RPCs
1800	3.57e-08	0.755857	0.384	0.28	0.00119879	7	ENSG00000006118	TMEM132A	late RPCs
1801	1.96e-10	0.755319	0.369	0.237	6.57e-06	7	ENSG00000162032	SPSB3	late RPCs
1802	3.63e-11	0.753754	0.5	0.36	1.22e-06	7	ENSG00000160097	FNDC5	late RPCs
1803	1.06e-06	0.751245	0.317	0.225	0.035504	7	ENSG00000108840	HDAC5	late RPCs
1804	3.87e-09	0.749137	0.392	0.268	0.000129628	7	ENSG00000099864	PALM	late RPCs
1805	9.09e-28	0.747513	0.772	0.512	3.05e-23	7	ENSG00000104435	STMN2	late RPCs
1806	6.78e-14	0.747213	0.399	0.225	2.27e-09	7	ENSG00000151640	DPYSL4	late RPCs
1807	1.73e-08	0.74647	0.429	0.316	0.000580542	7	ENSG00000142949	PTPRF	late RPCs
1808	3.58e-11	0.746288	0.299	0.161	1.2e-06	7	ENSG00000162374	ELAVL4	late RPCs
1809	2.62e-09	0.746217	0.299	0.172	8.78e-05	7	ENSG00000115266	APC2	late RPCs
1810	3.09e-21	0.745066	0.187	0.051	1.03e-16	7	ENSG00000148204	CRB2	late RPCs
1811	1.67e-09	0.743919	0.358	0.224	5.59e-05	7	ENSG00000150625	GPM6A	late RPCs
1812	4.72e-13	0.743663	0.28	0.134	1.58e-08	7	ENSG00000248540	AC010931.2	late RPCs
1813	1.48e-11	0.743568	0.451	0.295	4.97e-07	7	ENSG00000133169	BEX1	late RPCs
1814	7.09e-07	0.743245	0.321	0.228	0.0237711	7	ENSG00000146083	RNF44	late RPCs
1815	5.99e-12	0.739895	0.198	0.082	2.01e-07	7	ENSG00000182612	TSPAN10	late RPCs
1816	2.37e-07	0.737051	0.246	0.148	0.00795617	7	ENSG00000066629	EML1	late RPCs
1817	2.15e-16	0.735842	0.205	0.07	7.22e-12	7	ENSG00000120057	SFRP5	late RPCs
1818	4.96e-11	0.733027	0.19	0.081	1.66e-06	7	ENSG00000145920	CPLX2	late RPCs
1819	4.14e-09	0.731882	0.22	0.112	0.000138954	7	ENSG00000105808	RASA4	late RPCs
1820	1.63e-09	0.730985	0.265	0.146	5.48e-05	7	ENSG00000151376	ME3	late RPCs
1821	3.78e-08	0.729938	0.347	0.229	0.00126839	7	ENSG00000137309	HMGA1	late RPCs
1822	4.25e-09	0.729514	0.272	0.156	0.000142651	7	ENSG00000110042	DTX4	late RPCs
1823	1.56e-11	0.729398	0.519	0.38	5.22e-07	7	ENSG00000006042	TMEM98	late RPCs
1824	3.82e-13	0.727427	0.157	0.054	1.28e-08	7	ENSG00000164434	FABP7	late RPCs
1825	2.82e-18	0.726197	0.716	0.557	9.45e-14	7	ENSG00000154277	UCHL1	late RPCs
1826	3.45e-10	0.722493	0.522	0.393	1.16e-05	7	ENSG00000198911	SREBF2	late RPCs
1827	9.77e-17	0.721174	0.698	0.559	3.28e-12	7	ENSG00000184897	H1FX	late RPCs
1828	4.8e-08	0.720627	0.526	0.439	0.00160951	7	ENSG00000182087	TMEM259	late RPCs
1829	1.16e-11	0.720285	0.216	0.095	3.9e-07	7	ENSG00000077498	TYR	late RPCs
1830	4.94e-07	0.719602	0.392	0.295	0.0165654	7	ENSG00000133612	AGAP3	late RPCs
1831	1.79e-15	0.715436	0.209	0.077	6.01e-11	7	ENSG00000143195	ILDR2	late RPCs
1832	1.17e-05	0.713078	0.369	0.285	0.39344	7	ENSG00000109685	NSD2	late RPCs
1833	6.9e-15	0.712867	0.131	0.036	2.31e-10	7	ENSG00000181085	MAPK15	late RPCs
1834	1.43e-08	0.710139	0.175	0.083	0.000478539	7	ENSG00000116793	PHTF1	late RPCs
1835	4.19e-05	0.706372	0.332	0.254	1	7	ENSG00000132635	PCED1A	late RPCs
1836	5.73e-08	0.706159	0.481	0.381	0.00192137	7	ENSG00000050165	DKK3	late RPCs
1837	6.37e-18	0.705922	0.16	0.045	2.14e-13	7	ENSG00000204624	DISP3	late RPCs
1838	8.46e-05	0.705204	0.272	0.198	1	7	ENSG00000146067	FAM193B	late RPCs
1839	3.49e-09	0.704947	0.164	0.071	0.000116977	7	ENSG00000197467	COL13A1	late RPCs
1840	1.47e-13	0.704492	0.567	0.385	4.92e-09	7	ENSG00000172020	GAP43	late RPCs
1841	1.39e-15	0.703523	0.478	0.269	4.67e-11	7	ENSG00000173267	SNCG	late RPCs
1842	9.9e-13	0.702931	0.724	0.637	3.32e-08	7	ENSG00000109046	WSB1	late RPCs
1843	4.27e-10	0.700687	0.28	0.151	1.43e-05	7	ENSG00000108309	RUNDC3A	late RPCs
1844	1.57e-07	0.699481	0.373	0.263	0.0052712	7	ENSG00000167508	MVD	late RPCs
1845	3.15e-10	0.699368	0.53	0.408	1.06e-05	7	ENSG00000182944	EWSR1	late RPCs
1846	1.27e-06	0.697995	0.34	0.241	0.0425246	7	ENSG00000099331	MYO9B	late RPCs
1847	6.42e-19	0.696506	0.735	0.556	2.15e-14	7	ENSG00000131711	MAP1B	late RPCs
1848	5.35e-14	0.694293	0.183	0.065	1.79e-09	7	ENSG00000100156	SLC16A8	late RPCs
1849	1.32e-05	0.692083	0.362	0.281	0.441237	7	ENSG00000111752	PHC1	late RPCs
1850	1.01e-05	0.685377	0.396	0.319	0.338021	7	ENSG00000166508	MCM7	late RPCs
1851	2.15e-11	0.684522	0.478	0.318	7.2e-07	7	ENSG00000111674	ENO2	late RPCs
1852	2.32e-10	0.683562	0.216	0.102	7.78e-06	7	ENSG00000151615	POU4F2	late RPCs
1853	8.17e-08	0.680379	0.343	0.231	0.00273945	7	ENSG00000179051	RCC2	late RPCs
1854	2.61e-10	0.679597	0.187	0.082	8.76e-06	7	ENSG00000149243	KLHL35	late RPCs
1855	0.000124271	0.676763	0.269	0.196	1	7	ENSG00000169992	NLGN2	late RPCs
1856	2.94e-09	0.676584	0.164	0.072	9.87e-05	7	ENSG00000054690	PLEKHH1	late RPCs
1857	4.23e-08	0.676224	0.28	0.167	0.00141829	7	ENSG00000143995	MEIS1	late RPCs
1858	2.11e-06	0.675813	0.19	0.108	0.0708045	7	ENSG00000182685	BRICD5	late RPCs
1859	1.22e-07	0.674834	0.511	0.427	0.00410766	7	ENSG00000132386	SERPINF1	late RPCs
1860	5.45e-05	0.674009	0.414	0.349	1	7	ENSG00000132424	PNISR	late RPCs
1861	9.81e-09	0.671028	0.28	0.16	0.00032886	7	ENSG00000149926	FAM57B	late RPCs
1862	8.14e-14	0.670844	0.735	0.644	2.73e-09	7	ENSG00000074800	ENO1	late RPCs
1863	2.48e-19	0.670628	0.127	0.028	8.33e-15	7	ENSG00000223839	FAM95B1	late RPCs
1864	3.91e-06	0.670256	0.284	0.191	0.131254	7	ENSG00000197183	NOL4L	late RPCs
1865	0.000743219	0.668698	0.306	0.25	1	7	ENSG00000203880	PCMTD2	late RPCs
1866	1.43e-06	0.668336	0.228	0.135	0.0478593	7	ENSG00000152926	ZNF117	late RPCs
1867	4.06e-05	0.667142	0.328	0.253	1	7	ENSG00000130827	PLXNA3	late RPCs
1868	4.68e-12	0.666707	0.66	0.571	1.57e-07	7	ENSG00000129351	ILF3	late RPCs
1869	1.03e-07	0.666513	0.254	0.15	0.00344096	7	ENSG00000266074	BAHCC1	late RPCs
1870	6.03e-08	0.666435	0.209	0.111	0.00202279	7	ENSG00000143630	HCN3	late RPCs
1871	1.59e-08	0.666296	0.493	0.406	0.000534101	7	ENSG00000013441	CLK1	late RPCs
1872	1.78e-06	0.666261	0.213	0.124	0.0597115	7	ENSG00000106089	STX1A	late RPCs
1873	2.9e-06	0.665032	0.272	0.181	0.0972461	7	ENSG00000136490	LIMD2	late RPCs
1874	1.09e-20	0.664171	0.16	0.04	3.64e-16	7	ENSG00000173404	INSM1	late RPCs
1875	1.45e-08	0.661144	0.194	0.096	0.000487909	7	ENSG00000280789	PAGR1	late RPCs
1876	1.14e-11	0.659965	0.399	0.233	3.81e-07	7	ENSG00000198910	L1CAM	late RPCs
1877	4.08e-08	0.657684	0.138	0.059	0.00136973	7	ENSG00000236502	SIX3-AS1	late RPCs
1878	9.28e-07	0.656578	0.343	0.238	0.0311266	7	ENSG00000167178	ISLR2	late RPCs
1879	5.54e-27	0.656043	0.922	0.877	1.86e-22	7	ENSG00000122566	HNRNPA2B1	late RPCs
1880	3.09e-08	0.655034	0.358	0.239	0.00103662	7	ENSG00000165238	WNK2	late RPCs
1881	4.69e-05	0.654759	0.284	0.204	1	7	ENSG00000146830	GIGYF1	late RPCs
1882	4.63e-05	0.654415	0.354	0.279	1	7	ENSG00000152556	PFKM	late RPCs
1883	1.67e-08	0.653852	0.269	0.155	0.000559828	7	ENSG00000178531	CTXN1	late RPCs
1884	1.42e-06	0.653702	0.269	0.175	0.047488	7	ENSG00000163516	ANKZF1	late RPCs
1885	0.000107289	0.653413	0.216	0.144	1	7	ENSG00000137166	FOXP4	late RPCs
1886	2.33e-07	0.648755	0.269	0.166	0.00782691	7	ENSG00000184985	SORCS2	late RPCs
1887	3.6e-13	0.648384	0.16	0.055	1.21e-08	7	ENSG00000118513	MYB	late RPCs
1888	4.35e-05	0.645353	0.228	0.148	1	7	ENSG00000107736	CDH23	late RPCs
1889	3.07e-08	0.644792	0.149	0.066	0.00102831	7	ENSG00000101412	E2F1	late RPCs
1890	4e-08	0.64395	0.257	0.149	0.00134146	7	ENSG00000171316	CHD7	late RPCs
1891	1.99e-07	0.643052	0.172	0.085	0.00667042	7	ENSG00000275966	AC110285.6	late RPCs
1892	1.47e-06	0.641862	0.205	0.118	0.0494335	7	ENSG00000198089	SFI1	late RPCs
1893	3.78e-10	0.641134	0.194	0.088	1.27e-05	7	ENSG00000008300	CELSR3	late RPCs
1894	6.59e-06	0.639928	0.463	0.396	0.221002	7	ENSG00000007392	LUC7L	late RPCs
1895	6.59e-08	0.638656	0.265	0.156	0.00220874	7	ENSG00000159023	EPB41	late RPCs
1896	4.83e-07	0.638464	0.243	0.146	0.0161966	7	ENSG00000236782	AL391650.1	late RPCs
1897	9.99e-07	0.637854	0.381	0.282	0.0334958	7	ENSG00000079432	CIC	late RPCs
1898	0.00573878	0.633687	0.28	0.238	1	7	ENSG00000178188	SH2B1	late RPCs
1899	1.47e-06	0.633242	0.414	0.321	0.0493259	7	ENSG00000160285	LSS	late RPCs
1900	0.00190927	0.63318	0.358	0.317	1	7	ENSG00000103197	TSC2	late RPCs
1901	0.000344974	0.632929	0.291	0.223	1	7	ENSG00000005206	SPPL2B	late RPCs
1902	1.03e-06	0.632512	0.272	0.172	0.0344581	7	ENSG00000117016	RIMS3	late RPCs
1903	1.13e-07	0.63237	0.239	0.135	0.00378898	7	ENSG00000205336	ADGRG1	late RPCs
1904	5.19e-07	0.632332	0.474	0.395	0.0174063	7	ENSG00000088448	ANKRD10	late RPCs
1905	0.000103591	0.631667	0.384	0.318	1	7	ENSG00000105698	USF2	late RPCs
1906	4.83e-05	0.630925	0.261	0.182	1	7	ENSG00000170558	CDH2	late RPCs
1907	1.07e-12	0.630804	0.127	0.038	3.58e-08	7	ENSG00000272512	AL645608.8	late RPCs
1908	7.89e-05	0.630602	0.306	0.233	1	7	ENSG00000189180	ZNF33A	late RPCs
1909	9.58e-06	0.63005	0.28	0.191	0.321184	7	ENSG00000198720	ANKRD13B	late RPCs
1910	3.39e-06	0.629333	0.216	0.132	0.11353	7	ENSG00000196220	SRGAP3	late RPCs
1911	0.00032685	0.626545	0.254	0.182	1	7	ENSG00000033627	ATP6V0A1	late RPCs
1912	0.00053965	0.625666	0.261	0.196	1	7	ENSG00000101191	DIDO1	late RPCs
1913	0.000393486	0.625604	0.317	0.26	1	7	ENSG00000185189	NRBP2	late RPCs
1914	5.65e-09	0.624139	0.493	0.36	0.000189343	7	ENSG00000099194	SCD	late RPCs
1915	1.21e-06	0.623869	0.388	0.285	0.040588	7	ENSG00000105290	APLP1	late RPCs
1916	3.79e-05	0.61814	0.403	0.327	1	7	ENSG00000137817	PARP6	late RPCs
1917	0.000461535	0.61637	0.295	0.229	1	7	ENSG00000105419	MEIS3	late RPCs
1918	0.00325265	0.61619	0.254	0.204	1	7	ENSG00000149485	FADS1	late RPCs
1919	4.28e-05	0.615689	0.332	0.26	1	7	ENSG00000121716	PILRB	late RPCs
1920	1.22e-06	0.614899	0.407	0.307	0.0409157	7	ENSG00000116679	IVNS1ABP	late RPCs
1921	1.03e-05	0.613663	0.168	0.093	0.346701	7	ENSG00000076826	CAMSAP3	late RPCs
1922	4.6e-07	0.613295	0.116	0.049	0.0154151	7	ENSG00000242686	AC107464.1	late RPCs
1923	0.000568166	0.611566	0.243	0.178	1	7	ENSG00000067836	ROGDI	late RPCs
1924	3.08e-07	0.609385	0.5	0.401	0.01033	7	ENSG00000169710	FASN	late RPCs
1925	0.000599862	0.60853	0.205	0.144	1	7	ENSG00000139428	MMAB	late RPCs
1926	0.000192173	0.608205	0.272	0.204	1	7	ENSG00000177169	ULK1	late RPCs
1927	3.14e-07	0.607581	0.131	0.058	0.0105468	7	ENSG00000021300	PLEKHB1	late RPCs
1928	3.96e-06	0.60754	0.377	0.283	0.132872	7	ENSG00000129946	SHC2	late RPCs
1929	9.05e-05	0.606891	0.399	0.337	1	7	ENSG00000011243	AKAP8L	late RPCs
1930	1.49e-12	0.606579	0.104	0.028	5e-08	7	ENSG00000115257	PCSK4	late RPCs
1931	1.17e-05	0.60652	0.325	0.232	0.392125	7	ENSG00000167535	CACNB3	late RPCs
1932	3.8e-08	0.605451	0.578	0.507	0.00127563	7	ENSG00000134884	ARGLU1	late RPCs
1933	3.16e-06	0.605195	0.451	0.365	0.105995	7	ENSG00000182272	B4GALNT4	late RPCs
1934	8.78e-12	0.605097	0.131	0.042	2.94e-07	7	ENSG00000091536	MYO15A	late RPCs
1935	0.000195684	0.604829	0.291	0.218	1	7	ENSG00000169231	THBS3	late RPCs
1936	3.99e-05	0.604259	0.299	0.219	1	7	ENSG00000135164	DMTF1	late RPCs
1937	8.18e-09	0.601998	0.175	0.081	0.000274282	7	ENSG00000167771	RCOR2	late RPCs
1938	0.000324559	0.601839	0.388	0.336	1	7	ENSG00000107281	NPDC1	late RPCs
1939	0.00670006	0.600217	0.28	0.239	1	7	ENSG00000175455	CCDC14	late RPCs
1940	1.38e-06	0.599468	0.138	0.065	0.0463982	7	ENSG00000130518	IQCN	late RPCs
1941	1.09e-05	0.598435	0.149	0.079	0.366081	7	ENSG00000050438	SLC4A8	late RPCs
1942	1.13e-05	0.596526	0.332	0.247	0.378892	7	ENSG00000215440	NPEPL1	late RPCs
1943	2.4e-14	0.596408	0.866	0.811	8.04e-10	7	ENSG00000099622	CIRBP	late RPCs
1944	2.96e-06	0.596357	0.127	0.06	0.0993139	7	ENSG00000095397	WHRN	late RPCs
1945	7.04e-05	0.59541	0.183	0.114	1	7	ENSG00000187609	EXD3	late RPCs
1946	0.000138616	0.595046	0.287	0.216	1	7	ENSG00000244879	GABPB1-AS1	late RPCs
1947	3.79e-08	0.593218	0.19	0.095	0.00126951	7	ENSG00000162706	CADM3	late RPCs
1948	3.88e-07	0.593168	0.142	0.065	0.0130064	7	ENSG00000158106	RHPN1	late RPCs
1949	1.74e-06	0.591366	0.168	0.088	0.0582624	7	ENSG00000131591	C1orf159	late RPCs
1950	1.62e-06	0.590164	0.414	0.313	0.0541849	7	ENSG00000136450	SRSF1	late RPCs
1951	1.26e-08	0.588566	0.16	0.071	0.00042249	7	ENSG00000095739	BAMBI	late RPCs
1952	0.00244137	0.587946	0.179	0.127	1	7	ENSG00000180190	TDRP	late RPCs
1953	1.37e-07	0.587714	0.407	0.293	0.00460967	7	ENSG00000092096	SLC22A17	late RPCs
1954	5.68e-05	0.586727	0.28	0.201	1	7	ENSG00000119688	ABCD4	late RPCs
1955	3.18e-05	0.586542	0.384	0.305	1	7	ENSG00000134824	FADS2	late RPCs
1956	0.00214926	0.58649	0.343	0.299	1	7	ENSG00000087087	SRRT	late RPCs
1957	0.00116531	0.585256	0.209	0.151	1	7	ENSG00000215788	TNFRSF25	late RPCs
1958	0.000649626	0.584317	0.231	0.168	1	7	ENSG00000167702	KIFC2	late RPCs
1959	0.000637412	0.584018	0.31	0.247	1	7	ENSG00000167470	MIDN	late RPCs
1960	6.82e-06	0.583558	0.28	0.186	0.228691	7	ENSG00000103034	NDRG4	late RPCs
1961	1.13e-13	0.583365	0.608	0.427	3.8e-09	7	ENSG00000148798	INA	late RPCs
1962	1.23e-12	0.582765	0.56	0.373	4.13e-08	7	ENSG00000168824	NSG1	late RPCs
1963	1.85e-06	0.581145	0.582	0.537	0.061938	7	ENSG00000124193	SRSF6	late RPCs
1964	0.00333759	0.58077	0.246	0.193	1	7	ENSG00000112511	PHF1	late RPCs
1965	2.55e-09	0.5798	0.366	0.222	8.56e-05	7	ENSG00000080166	DCT	late RPCs
1966	2.71e-12	0.579124	0.131	0.041	9.07e-08	7	ENSG00000153266	FEZF2	late RPCs
1967	3.07e-06	0.578978	0.205	0.119	0.102864	7	ENSG00000070669	ASNS	late RPCs
1968	1.75e-17	0.578866	0.112	0.024	5.86e-13	7	ENSG00000130055	GDPD2	late RPCs
1969	3.45e-11	0.578091	0.213	0.093	1.16e-06	7	ENSG00000181449	SOX2	late RPCs
1970	0.00402424	0.577755	0.41	0.376	1	7	ENSG00000144028	SNRNP200	late RPCs
1971	9.23e-09	0.577017	0.675	0.639	0.000309431	7	ENSG00000251562	MALAT1	late RPCs
1972	1.38e-09	0.576829	0.668	0.614	4.64e-05	7	ENSG00000114115	RBP1	late RPCs
1973	2.52e-05	0.576531	0.302	0.22	0.846309	7	ENSG00000140365	COMMD4	late RPCs
1974	0.000419155	0.576091	0.366	0.304	1	7	ENSG00000080845	DLGAP4	late RPCs
1975	2.97e-05	0.57337	0.183	0.108	0.995882	7	ENSG00000177551	NHLH2	late RPCs
1976	0.00259659	0.572217	0.201	0.148	1	7	ENSG00000250510	GPR162	late RPCs
1977	4.88e-07	0.571487	0.127	0.056	0.0163754	7	ENSG00000152467	ZSCAN1	late RPCs
1978	0.000133656	0.570815	0.179	0.11	1	7	ENSG00000157873	TNFRSF14	late RPCs
1979	0.00376733	0.570642	0.201	0.149	1	7	ENSG00000172009	THOP1	late RPCs
1980	1.18e-05	0.569287	0.328	0.238	0.394546	7	ENSG00000116133	DHCR24	late RPCs
1981	0.000581364	0.567878	0.302	0.238	1	7	ENSG00000104549	SQLE	late RPCs
1982	0.00158644	0.567398	0.209	0.15	1	7	ENSG00000136603	SKIL	late RPCs
1983	4.39e-07	0.567137	0.183	0.096	0.0147384	7	ENSG00000183248	PRR36	late RPCs
1984	5.32e-10	0.567084	0.619	0.514	1.78e-05	7	ENSG00000092964	DPYSL2	late RPCs
1985	1.35e-05	0.566581	0.25	0.163	0.451763	7	ENSG00000123636	BAZ2B	late RPCs
1986	0.000291	0.56617	0.164	0.103	1	7	ENSG00000139146	SINHCAF	late RPCs
1987	2.85e-07	0.56593	0.134	0.06	0.00954336	7	ENSG00000188505	NCCRP1	late RPCs
1988	0.00127203	0.565822	0.16	0.106	1	7	ENSG00000173531	MST1	late RPCs
1989	3.07e-05	0.565779	0.362	0.287	1	7	ENSG00000100422	CERK	late RPCs
1990	1.2e-07	0.564789	0.381	0.259	0.00404037	7	ENSG00000158164	TMSB15A	late RPCs
1991	0.000131781	0.564755	0.183	0.111	1	7	ENSG00000107165	TYRP1	late RPCs
1992	0.00329091	0.564512	0.146	0.099	1	7	ENSG00000096093	EFHC1	late RPCs
1993	5.71e-06	0.564371	0.209	0.124	0.191598	7	ENSG00000163918	RFC4	late RPCs
1994	2.45e-07	0.563676	0.552	0.446	0.00821003	7	ENSG00000149294	NCAM1	late RPCs
1995	0.00036895	0.563523	0.194	0.13	1	7	ENSG00000232931	LINC00342	late RPCs
1996	7.39e-05	0.561627	0.153	0.089	1	7	ENSG00000062822	POLD1	late RPCs
1997	8.2e-05	0.561309	0.418	0.368	1	7	ENSG00000127616	SMARCA4	late RPCs
1998	0.00452419	0.560351	0.291	0.237	1	7	ENSG00000132716	DCAF8	late RPCs
[truncated: 1,091 more rows]

## Sheet: PCW11_15685
ST: 15685; 11 PCW
	p_val	avg_log2FC	pct.1	pct.2	p_val_adj	cluster	gene	Symbol	cell fate
1	0	3.6462	0.962	0.174	0	0	ENSG00000101470	TNNC2	extraocular muscle
2	0	3.44869	0.99	0.337	0	0	ENSG00000109063	MYH3	extraocular muscle
3	0	3.4296	0.997	0.367	0	0	ENSG00000159251	ACTC1	extraocular muscle
4	0	3.37426	0.945	0.164	0	0	ENSG00000105048	TNNT1	extraocular muscle
5	0	3.31256	0.982	0.555	0	0	ENSG00000214548	MEG3	extraocular muscle
6	0	3.25087	0.876	0.087	0	0	ENSG00000130598	TNNI2	extraocular muscle
7	0	3.22241	0.929	0.168	0	0	ENSG00000159173	TNNI1	extraocular muscle
8	0	3.21823	0.948	0.186	0	0	ENSG00000143632	ACTA1	extraocular muscle
9	0	3.21465	0.973	0.288	0	0	ENSG00000180209	MYLPF	extraocular muscle
10	0	3.14791	0.846	0.116	0	0	ENSG00000111245	MYL2	extraocular muscle
11	0	3.1048	0.962	0.216	0	0	ENSG00000168530	MYL1	extraocular muscle
12	0	3.05919	0.879	0.117	0	0	ENSG00000198336	MYL4	extraocular muscle
13	0	3.02611	0.795	0.103	0	0	ENSG00000130595	TNNT3	extraocular muscle
14	0	2.98161	0.87	0.151	0	0	ENSG00000114854	TNNC1	extraocular muscle
15	0	2.97301	0.921	0.159	0	0	ENSG00000185847	LINC01405	extraocular muscle
16	0	2.8709	0.88	0.142	0	0	ENSG00000155657	TTN	extraocular muscle
17	0	2.82576	0.944	0.318	0	0	ENSG00000198467	TPM2	extraocular muscle
18	0	2.82468	0.794	0.087	0	0	ENSG00000170290	SLN	extraocular muscle
19	0	2.76905	0.862	0.132	0	0	ENSG00000156885	COX6A2	extraocular muscle
20	0	2.67335	0.726	0.076	0	0	ENSG00000092054	MYH7	extraocular muscle
21	0	2.64012	0.75	0.064	0	0	ENSG00000129170	CSRP3	extraocular muscle
22	0	2.61979	0.715	0.049	0	0	ENSG00000118194	TNNT2	extraocular muscle
23	0	2.57991	0.808	0.09	0	0	ENSG00000239474	KLHL41	extraocular muscle
24	0	2.47739	0.743	0.079	0	0	ENSG00000104879	CKM	extraocular muscle
25	1.51817e-305	2.46467	0.632	0.085	5.09162e-301	0	ENSG00000078814	MYH7B	extraocular muscle
26	0	2.46267	0.721	0.063	0	0	ENSG00000091482	SMPX	extraocular muscle
27	0	2.41414	0.571	0.039	0	0	ENSG00000133055	MYBPH	extraocular muscle
28	0	2.36808	0.691	0.05	0	0	ENSG00000175084	DES	extraocular muscle
29	0	2.30999	0.677	0.074	0	0	ENSG00000196091	MYBPC1	extraocular muscle
30	0	2.21689	0.622	0.053	0	0	ENSG00000160808	MYL3	extraocular muscle
31	0	2.16389	0.557	0.048	0	0	ENSG00000138435	CHRNA1	extraocular muscle
32	0	2.1628	0.693	0.085	0	0	ENSG00000183091	NEB	extraocular muscle
33	5.14828e-214	2.1625	0.824	0.39	1.72663e-209	0	ENSG00000143549	TPM3	extraocular muscle
34	1.93609e-265	2.14032	0.817	0.237	6.49325e-261	0	ENSG00000161281	COX7A1	extraocular muscle
35	0	2.11354	0.543	0.027	0	0	ENSG00000122180	MYOG	extraocular muscle
36	0	2.09201	0.588	0.051	0	0	ENSG00000127743	IL17B	extraocular muscle
37	0	2.04317	0.578	0.045	0	0	ENSG00000169271	HSPB3	extraocular muscle
38	1.39027e-270	1.94069	0.522	0.05	4.66268e-266	0	ENSG00000122367	LDB3	extraocular muscle
39	6.04031e-180	1.85526	0.667	0.214	2.0258e-175	0	ENSG00000242265	PEG10	extraocular muscle
40	4.18016e-249	1.83626	0.922	0.614	1.40194e-244	0	ENSG00000196465	MYL6B	extraocular muscle
41	5.04496e-260	1.82868	0.441	0.029	1.69198e-255	0	ENSG00000268518	AC020909.2	extraocular muscle
42	4.73604e-183	1.82158	0.642	0.189	1.58837e-178	0	ENSG00000170276	HSPB2	extraocular muscle
43	3.78945e-289	1.80379	0.457	0.024	1.27091e-284	0	ENSG00000184343	SRPK3	extraocular muscle
44	1.09965e-285	1.74731	0.575	0.062	3.68802e-281	0	ENSG00000077522	ACTN2	extraocular muscle
45	9.53655e-243	1.72723	0.542	0.066	3.19837e-238	0	ENSG00000227877	MRLN	extraocular muscle
46	1.09083e-230	1.71045	0.46	0.043	3.65841e-226	0	ENSG00000133020	MYH8	extraocular muscle
47	0	1.68671	0.687	0.085	0	0	ENSG00000108515	ENO3	extraocular muscle
48	1.50722e-192	1.68643	0.573	0.116	5.05491e-188	0	ENSG00000128591	FLNC	extraocular muscle
49	2.23658e-156	1.67282	0.776	0.384	7.50105e-152	0	ENSG00000140416	TPM1	extraocular muscle
50	1.9548e-173	1.66626	0.869	0.629	6.55599e-169	0	ENSG00000178980	SELENOW	extraocular muscle
51	1.2126e-200	1.65562	0.544	0.095	4.06683e-196	0	ENSG00000081189	MEF2C	extraocular muscle
52	2.98314e-243	1.63312	0.491	0.048	1.00049e-238	0	ENSG00000118729	CASQ2	extraocular muscle
53	5.76415e-265	1.62053	0.41	0.019	1.93318e-260	0	ENSG00000182533	CAV3	extraocular muscle
54	4.4044e-238	1.60889	0.409	0.026	1.47715e-233	0	ENSG00000139914	FITM1	extraocular muscle
55	2.68731e-226	1.60649	0.441	0.04	9.01269e-222	0	ENSG00000185739	SRL	extraocular muscle
56	1.2197e-193	1.56108	0.365	0.03	4.09063e-189	0	ENSG00000196218	RYR1	extraocular muscle
57	5.88359e-146	1.53813	0.399	0.069	1.97324e-141	0	ENSG00000215375	MYL5	extraocular muscle
58	1.17064e-162	1.51223	0.532	0.12	3.92609e-158	0	ENSG00000132688	NES	extraocular muscle
59	1.93725e-225	1.50165	0.386	0.024	6.49716e-221	0	ENSG00000198125	MB	extraocular muscle
60	4.35112e-217	1.43475	0.401	0.03	1.45928e-212	0	ENSG00000108823	SGCA	extraocular muscle
61	1.43251e-211	1.42496	0.347	0.019	4.80437e-207	0	ENSG00000129910	CDH15	extraocular muscle
62	6.22457e-155	1.40136	0.415	0.066	2.0876e-150	0	ENSG00000168743	NPNT	extraocular muscle
63	4.88608e-209	1.37456	0.358	0.022	1.63869e-204	0	ENSG00000124701	APOBEC2	extraocular muscle
64	7.77548e-205	1.37427	0.403	0.035	2.60774e-200	0	ENSG00000172399	MYOZ2	extraocular muscle
65	1.89861e-193	1.36411	0.35	0.025	6.36757e-189	0	ENSG00000271860	AL589740.1	extraocular muscle
66	3.52188e-198	1.36263	0.36	0.025	1.18117e-193	0	ENSG00000258675	LINC02308	extraocular muscle
67	9.76774e-107	1.36174	0.595	0.24	3.2759e-102	0	ENSG00000174437	ATP2A2	extraocular muscle
68	4.4949e-200	1.34637	0.344	0.021	1.5075e-195	0	ENSG00000115593	SMYD1	extraocular muscle
69	2.98241e-75	1.30989	0.329	0.094	1.00024e-70	0	ENSG00000278817	AC007325.4	extraocular muscle
70	1.24147e-174	1.30498	0.299	0.018	4.16365e-170	0	ENSG00000135902	CHRND	extraocular muscle
71	9.03236e-83	1.30451	0.519	0.222	3.02927e-78	0	ENSG00000136717	BIN1	extraocular muscle
72	1.02e-95	1.29368	0.489	0.169	3.42087e-91	0	ENSG00000178104	PDE4DIP	extraocular muscle
73	4.65183e-157	1.28962	0.296	0.024	1.56013e-152	0	ENSG00000165917	RAPSN	extraocular muscle
74	8.93751e-85	1.2729	0.471	0.173	2.99746e-80	0	ENSG00000166619	BLCAP	extraocular muscle
75	2.56087e-172	1.26332	0.33	0.027	8.58865e-168	0	ENSG00000165973	NELL1	extraocular muscle
76	5.21866e-114	1.24926	0.388	0.079	1.75024e-109	0	ENSG00000041982	TNC	extraocular muscle
77	6.46173e-153	1.24597	0.288	0.022	2.16714e-148	0	ENSG00000173991	TCAP	extraocular muscle
78	1.33053e-149	1.23222	0.33	0.036	4.46234e-145	0	ENSG00000008517	IL32	extraocular muscle
79	1.31674e-181	1.23193	0.3	0.016	4.41609e-177	0	ENSG00000142661	MYOM3	extraocular muscle
80	3.02317e-123	1.22116	0.323	0.049	1.01391e-118	0	ENSG00000036448	MYOM2	extraocular muscle
81	6.5579e-106	1.21364	0.35	0.07	2.19939e-101	0	ENSG00000204219	TCEA3	extraocular muscle
82	4.24839e-167	1.19233	0.285	0.016	1.42483e-162	0	ENSG00000141161	UNC45B	extraocular muscle
83	6.51627e-59	1.18434	0.458	0.228	2.18543e-54	0	ENSG00000165410	CFL2	extraocular muscle
84	2.17896e-92	1.18289	0.386	0.101	7.30778e-88	0	ENSG00000159713	TPPP3	extraocular muscle
85	3.64358e-122	1.18199	0.292	0.036	1.22198e-117	0	ENSG00000014138	POLA2	extraocular muscle
86	1.45421e-132	1.17635	0.753	0.298	4.87715e-128	0	ENSG00000185559	DLK1	extraocular muscle
87	5.24342e-77	1.17565	0.348	0.1	1.75854e-72	0	ENSG00000154358	OBSCN	extraocular muscle
88	6.5097e-175	1.15504	0.252	0.007	2.18322e-170	0	ENSG00000185482	STAC3	extraocular muscle
89	1.64488e-82	1.12766	0.423	0.134	5.5166e-78	0	ENSG00000160097	FNDC5	extraocular muscle
90	3.48215e-77	1.12145	0.292	0.067	1.16784e-72	0	ENSG00000167393	PPP2R3B	extraocular muscle
91	8.19797e-118	1.1197	0.278	0.034	2.74944e-113	0	ENSG00000067191	CACNB1	extraocular muscle
92	3.81139e-137	1.11847	0.268	0.022	1.27826e-132	0	ENSG00000101605	MYOM1	extraocular muscle
93	2.88882e-59	1.11654	0.322	0.108	9.68854e-55	0	ENSG00000159348	CYB5R1	extraocular muscle
94	1.55515e-147	1.10973	0.272	0.019	5.21565e-143	0	ENSG00000111046	MYF6	extraocular muscle
95	1.18447e-141	1.10839	0.252	0.016	3.97247e-137	0	ENSG00000117115	PADI2	extraocular muscle
96	1.27912e-49	1.09887	0.378	0.171	4.2899e-45	0	ENSG00000163110	PDLIM5	extraocular muscle
97	2.99811e-56	1.09631	0.334	0.123	1.00551e-51	0	ENSG00000106992	AK1	extraocular muscle
98	1.63719e-98	1.09606	0.341	0.069	5.4908e-94	0	ENSG00000154553	PDLIM3	extraocular muscle
99	8.56489e-86	1.09205	0.299	0.062	2.87249e-81	0	ENSG00000171365	CLCN5	extraocular muscle
100	4.73976e-142	1.06449	0.227	0.01	1.58962e-137	0	ENSG00000169885	CALML6	extraocular muscle
101	2.14297e-206	1.06152	0.992	0.943	7.18709e-202	0	ENSG00000162244	RPL29	extraocular muscle
102	9.52587e-147	1.04953	0.254	0.015	3.19479e-142	0	ENSG00000237560	LINC01497	extraocular muscle
103	7.41472e-127	1.04203	0.23	0.016	2.48675e-122	0	ENSG00000160867	FGFR4	extraocular muscle
104	2.81326e-111	1.04118	0.254	0.029	9.43512e-107	0	ENSG00000223749	MIR503HG	extraocular muscle
105	7.23767e-98	1.04072	0.226	0.026	2.42737e-93	0	ENSG00000206561	COLQ	extraocular muscle
106	1.62157e-119	1.03482	0.268	0.029	5.43843e-115	0	ENSG00000176076	KCNE5	extraocular muscle
107	2.89961e-89	1.03335	0.274	0.048	9.72471e-85	0	ENSG00000135424	ITGA7	extraocular muscle
108	8.4269e-86	1.0192	0.274	0.052	2.82621e-81	0	ENSG00000087085	ACHE	extraocular muscle
109	6.50381e-68	1.01763	0.278	0.071	2.18125e-63	0	ENSG00000124762	CDKN1A	extraocular muscle
110	2.02266e-124	1.0135	0.233	0.017	6.78359e-120	0	ENSG00000144771	LRTM1	extraocular muscle
111	2.89451e-108	1.00505	0.276	0.037	9.70759e-104	0	ENSG00000065361	ERBB3	extraocular muscle
112	2.6739e-180	0.974884	0.992	0.963	8.96772e-176	0	ENSG00000161970	RPL26	extraocular muscle
113	1.86075e-161	0.973197	0.986	0.942	6.24059e-157	0	ENSG00000241343	RPL36A	extraocular muscle
114	7.01291e-75	0.972164	0.329	0.084	2.35199e-70	0	ENSG00000204291	COL15A1	extraocular muscle
115	4.31974e-95	0.965581	0.251	0.035	1.44876e-90	0	ENSG00000223403	MEG9	extraocular muscle
116	3.84645e-39	0.959711	0.298	0.125	1.29002e-34	0	ENSG00000103994	ZNF106	extraocular muscle
117	2.77365e-85	0.956393	0.243	0.037	9.30228e-81	0	ENSG00000189058	APOD	extraocular muscle
118	6.1553e-133	0.947435	0.961	0.901	2.06437e-128	0	ENSG00000265681	RPL17	extraocular muscle
119	1.67978e-180	0.939834	0.992	0.947	5.63365e-176	0	ENSG00000174444	RPL4	extraocular muscle
120	5.89567e-75	0.935539	0.254	0.051	1.97729e-70	0	ENSG00000170175	CHRNB1	extraocular muscle
121	2.14815e-83	0.928749	0.291	0.056	7.20446e-79	0	ENSG00000123572	NRK	extraocular muscle
122	9.12298e-114	0.907933	0.243	0.023	3.05967e-109	0	ENSG00000172995	ARPP21	extraocular muscle
123	6.6372e-61	0.904891	0.371	0.126	2.22598e-56	0	ENSG00000176014	TUBB6	extraocular muscle
124	2.91315e-48	0.89846	0.386	0.162	9.77013e-44	0	ENSG00000182916	TCEAL7	extraocular muscle
125	2.44887e-132	0.895755	0.976	0.922	8.21303e-128	0	ENSG00000149273	RPS3	extraocular muscle
126	2.66445e-105	0.892911	0.171	0.008	8.93604e-101	0	ENSG00000157119	KLHL40	extraocular muscle
127	2.88335e-88	0.889165	0.21	0.025	9.67018e-84	0	ENSG00000154645	CHODL	extraocular muscle
128	1.06599e-59	0.886523	0.779	0.65	3.57512e-55	0	ENSG00000104529	EEF1D	extraocular muscle
129	7.74041e-161	0.884617	0.987	0.963	2.59598e-156	0	ENSG00000231500	RPS18	extraocular muscle
130	1.14413e-120	0.876404	0.205	0.011	3.83717e-116	0	ENSG00000168509	HJV	extraocular muscle
131	4.86586e-34	0.876186	0.433	0.248	1.63191e-29	0	ENSG00000173457	PPP1R14B	extraocular muscle
132	1.27961e-29	0.869322	0.283	0.133	4.29157e-25	0	ENSG00000009954	BAZ1B	extraocular muscle
133	1.94561e-148	0.868089	0.996	0.966	6.52518e-144	0	ENSG00000198034	RPS4X	extraocular muscle
134	2.56927e-117	0.862346	0.203	0.012	8.6168e-113	0	ENSG00000115221	ITGB6	extraocular muscle
135	9.03963e-120	0.859156	0.207	0.012	3.03171e-115	0	ENSG00000166317	SYNPO2L	extraocular muscle
136	2.51456e-90	0.858444	0.906	0.648	8.43335e-86	0	ENSG00000106211	HSPB1	extraocular muscle
137	1.23217e-34	0.854084	0.276	0.118	4.13246e-30	0	ENSG00000130005	GAMT	extraocular muscle
138	2.56037e-19	0.849456	0.353	0.237	8.58698e-15	0	ENSG00000122477	LRRC39	extraocular muscle
139	1.37655e-119	0.84753	0.975	0.9	4.61666e-115	0	ENSG00000188846	RPL14	extraocular muscle
140	1.06596e-102	0.844802	0.192	0.014	3.57502e-98	0	ENSG00000265142	MIR133A1HG	extraocular muscle
141	6.38335e-55	0.844498	0.269	0.077	2.14085e-50	0	ENSG00000153956	CACNA2D1	extraocular muscle
142	3.01169e-38	0.842181	0.626	0.49	1.01006e-33	0	ENSG00000101608	MYL12A	extraocular muscle
143	1.23536e-150	0.838784	0.984	0.939	4.14316e-146	0	ENSG00000136942	RPL35	extraocular muscle
144	2.34205e-118	0.838529	0.172	0.005	7.85478e-114	0	ENSG00000183631	PRR32	extraocular muscle
145	2.02822e-121	0.83733	0.973	0.925	6.80226e-117	0	ENSG00000198755	RPL10A	extraocular muscle
146	8.42927e-45	0.836498	0.391	0.182	2.82701e-40	0	ENSG00000169764	UGP2	extraocular muscle
147	2.22534e-16	0.834851	0.295	0.194	7.46335e-12	0	ENSG00000121769	FABP3	extraocular muscle
148	3.61367e-147	0.831028	0.987	0.943	1.21195e-142	0	ENSG00000105193	RPS16	extraocular muscle
149	1.19902e-95	0.830072	0.19	0.016	4.02127e-91	0	ENSG00000120729	MYOT	extraocular muscle
150	1.361e-115	0.827955	0.19	0.009	4.56453e-111	0	ENSG00000196296	ATP2A1	extraocular muscle
151	3.07268e-135	0.825907	0.992	0.955	1.03051e-130	0	ENSG00000142676	RPL11	extraocular muscle
152	8.02206e-53	0.820113	0.773	0.649	2.69044e-48	0	ENSG00000135390	ATP5MC2	extraocular muscle
153	2.30341e-83	0.81891	0.227	0.032	7.72518e-79	0	ENSG00000162614	NEXN	extraocular muscle
154	9.28185e-15	0.817459	0.398	0.326	3.11295e-10	0	ENSG00000196923	PDLIM7	extraocular muscle
155	4.16707e-29	0.812724	0.368	0.203	1.39755e-24	0	ENSG00000182054	IDH2	extraocular muscle
156	9.48374e-102	0.810663	0.164	0.007	3.18066e-97	0	ENSG00000138100	TRIM54	extraocular muscle
157	2.40932e-25	0.809862	0.199	0.083	8.08037e-21	0	ENSG00000072954	TMEM38A	extraocular muscle
158	8.65392e-110	0.808607	0.958	0.901	2.90235e-105	0	ENSG00000083845	RPS5	extraocular muscle
159	2.72719e-30	0.808384	0.272	0.12	9.14646e-26	0	ENSG00000076685	NT5C2	extraocular muscle
160	1.66832e-167	0.806251	0.994	0.978	5.59523e-163	0	ENSG00000144713	RPL32	extraocular muscle
161	5.75312e-115	0.805985	0.976	0.939	1.92948e-110	0	ENSG00000114391	RPL24	extraocular muscle
162	2.90826e-174	0.805536	0.99	0.981	9.75371e-170	0	ENSG00000167526	RPL13	extraocular muscle
163	5.85158e-175	0.80133	1	0.981	1.9625e-170	0	ENSG00000112306	RPS12	extraocular muscle
164	1.57215e-127	0.801172	0.983	0.938	5.27269e-123	0	ENSG00000116251	RPL22	extraocular muscle
165	1.13625e-14	0.800215	0.234	0.144	3.81076e-10	0	ENSG00000175567	UCP2	extraocular muscle
166	2.14992e-40	0.7954	0.245	0.082	7.21041e-36	0	ENSG00000184489	PTP4A3	extraocular muscle
167	1.11468e-53	0.79516	0.58	0.284	3.7384e-49	0	ENSG00000053438	NNAT	extraocular muscle
168	3.95536e-115	0.793638	0.961	0.894	1.32655e-110	0	ENSG00000204628	RACK1	extraocular muscle
169	5.45659e-141	0.791134	0.986	0.955	1.83003e-136	0	ENSG00000108298	RPL19	extraocular muscle
170	3.1754e-12	0.790936	0.244	0.165	1.06497e-07	0	ENSG00000112183	RBM24	extraocular muscle
171	2.10867e-150	0.786591	0.994	0.962	7.07205e-146	0	ENSG00000137154	RPS6	extraocular muscle
172	5.5553e-180	0.7845	0.999	0.987	1.86314e-175	0	ENSG00000197756	RPL37A	extraocular muscle
173	2.27251e-142	0.784487	0.984	0.955	7.62153e-138	0	ENSG00000115268	RPS15	extraocular muscle
174	8.45572e-39	0.779347	0.2	0.059	2.83588e-34	0	ENSG00000104936	DMPK	extraocular muscle
175	1.75472e-49	0.773082	0.267	0.079	5.88498e-45	0	ENSG00000169116	PARM1	extraocular muscle
176	1.28614e-14	0.771392	0.165	0.083	4.31345e-10	0	ENSG00000103876	FAH	extraocular muscle
177	2.75732e-35	0.769234	0.289	0.119	9.24751e-31	0	ENSG00000173402	DAG1	extraocular muscle
178	1.88352e-135	0.76668	0.975	0.932	6.31694e-131	0	ENSG00000161016	RPL8	extraocular muscle
179	9.97107e-37	0.766544	0.31	0.128	3.3441e-32	0	ENSG00000132561	MATN2	extraocular muscle
180	1.2301e-14	0.766181	0.159	0.079	4.12552e-10	0	ENSG00000120669	SOHLH2	extraocular muscle
181	8.48186e-31	0.76365	0.506	0.328	2.84465e-26	0	ENSG00000022267	FHL1	extraocular muscle
182	1.80981e-104	0.763081	0.178	0.01	6.06975e-100	0	ENSG00000248713	C4orf54	extraocular muscle
183	4.0371e-150	0.762868	0.994	0.973	1.35396e-145	0	ENSG00000186468	RPS23	extraocular muscle
184	6.77585e-22	0.762353	0.205	0.094	2.27249e-17	0	ENSG00000185437	SH3BGR	extraocular muscle
185	1.54946e-59	0.760123	0.237	0.055	5.19658e-55	0	ENSG00000162688	AGL	extraocular muscle
186	5.99436e-19	0.758929	0.31	0.191	2.01039e-14	0	ENSG00000063660	GPC1	extraocular muscle
187	4.48214e-138	0.758077	0.997	0.974	1.50322e-133	0	ENSG00000143947	RPS27A	extraocular muscle
188	1.69074e-149	0.755198	0.992	0.967	5.6704e-145	0	ENSG00000108107	RPL28	extraocular muscle
189	3.20524e-60	0.754835	0.192	0.033	1.07497e-55	0	ENSG00000092607	TBX15	extraocular muscle
190	2.40469e-33	0.750986	0.371	0.185	8.06484e-29	0	ENSG00000175183	CSRP2	extraocular muscle
191	4.29469e-41	0.748806	0.74	0.638	1.44035e-36	0	ENSG00000100129	EIF3L	extraocular muscle
192	2.43029e-71	0.747252	0.185	0.025	8.15072e-67	0	ENSG00000239922	AC092958.1	extraocular muscle
193	9.44261e-32	0.746854	0.344	0.167	3.16686e-27	0	ENSG00000144749	LRIG1	extraocular muscle
194	8.18579e-95	0.745616	0.955	0.898	2.74535e-90	0	ENSG00000149806	FAU	extraocular muscle
195	3.00877e-27	0.745497	0.282	0.135	1.00908e-22	0	ENSG00000011105	TSPAN9	extraocular muscle
196	2.36263e-73	0.741943	0.181	0.022	7.92378e-69	0	ENSG00000178860	MSC	extraocular muscle
197	5.70015e-51	0.739247	0.21	0.05	1.91172e-46	0	ENSG00000161638	ITGA5	extraocular muscle
198	8.31124e-10	0.739099	0.291	0.228	2.78742e-05	0	ENSG00000149925	ALDOA	extraocular muscle
199	5.05369e-98	0.73578	0.97	0.916	1.69491e-93	0	ENSG00000196531	NACA	extraocular muscle
200	1.11876e-61	0.735485	0.157	0.02	3.75211e-57	0	ENSG00000167476	JSRP1	extraocular muscle
201	1.10064e-32	0.734833	0.292	0.124	3.69134e-28	0	ENSG00000124440	HIF3A	extraocular muscle
202	5.7528e-13	0.728334	0.405	0.311	1.92937e-08	0	ENSG00000181350	LRRC75A	extraocular muscle
203	1.92894e-123	0.727448	0.989	0.954	6.46928e-119	0	ENSG00000071082	RPL31	extraocular muscle
204	2.04558e-84	0.721772	0.164	0.013	6.86048e-80	0	ENSG00000129152	MYOD1	extraocular muscle
205	5.05528e-23	0.721484	0.19	0.078	1.69544e-18	0	ENSG00000119906	SLF2	extraocular muscle
206	3.00053e-07	0.720459	0.162	0.11	0.0100632	0	ENSG00000070182	SPTB	extraocular muscle
207	1.77823e-137	0.718733	0.989	0.978	5.96384e-133	0	ENSG00000147403	RPL10	extraocular muscle
208	2.16301e-72	0.707676	0.189	0.026	7.25432e-68	0	ENSG00000170417	TMEM182	extraocular muscle
209	1.14838e-26	0.707478	0.333	0.168	3.85144e-22	0	ENSG00000197321	SVIL	extraocular muscle
210	1.61813e-122	0.705298	0.99	0.956	5.42689e-118	0	ENSG00000089009	RPL6	extraocular muscle
211	1.46163e-56	0.704431	0.85	0.773	4.90203e-52	0	ENSG00000196683	TOMM7	extraocular muscle
212	2.34854e-84	0.70349	0.157	0.011	7.87653e-80	0	ENSG00000172508	CARNS1	extraocular muscle
213	1.34461e-136	0.70166	0.993	0.976	4.50954e-132	0	ENSG00000142937	RPS8	extraocular muscle
214	4.00586e-40	0.700627	0.324	0.126	1.34348e-35	0	ENSG00000077274	CAPN6	extraocular muscle
215	3.87819e-51	0.700194	0.209	0.048	1.30067e-46	0	ENSG00000185585	OLFML2A	extraocular muscle
216	4.07981e-49	0.699382	0.285	0.089	1.36829e-44	0	ENSG00000122694	GLIPR2	extraocular muscle
217	4.9516e-109	0.698912	0.977	0.956	1.66067e-104	0	ENSG00000118181	RPS25	extraocular muscle
218	1.00981e-90	0.697539	0.169	0.012	3.38668e-86	0	ENSG00000147573	TRIM55	extraocular muscle
219	1.18836e-104	0.696885	0.973	0.933	3.98554e-100	0	ENSG00000063177	RPL18	extraocular muscle
220	2.46819e-74	0.695618	0.124	0.006	8.27782e-70	0	ENSG00000234281	LANCL1-AS1	extraocular muscle
221	2.34586e-38	0.693365	0.214	0.066	7.86753e-34	0	ENSG00000163346	PBXIP1	extraocular muscle
222	1.14789e-26	0.693242	0.265	0.122	3.8498e-22	0	ENSG00000068903	SIRT2	extraocular muscle
223	1.21494e-32	0.692795	0.719	0.642	4.07468e-28	0	ENSG00000111716	LDHB	extraocular muscle
224	7.97849e-19	0.691345	0.199	0.097	2.67583e-14	0	ENSG00000116741	RGS2	extraocular muscle
225	2.96965e-22	0.691022	0.602	0.529	9.9596e-18	0	ENSG00000174021	GNG5	extraocular muscle
226	2.09726e-33	0.690548	0.228	0.081	7.0338e-29	0	ENSG00000139289	PHLDA1	extraocular muscle
227	4.8371e-64	0.688983	0.152	0.017	1.62227e-59	0	ENSG00000157510	AFAP1L1	extraocular muscle
228	3.6141e-91	0.687613	0.148	0.007	1.2121e-86	0	ENSG00000108878	CACNG1	extraocular muscle
229	1.07122e-34	0.687093	0.181	0.053	3.59266e-30	0	ENSG00000072195	SPEG	extraocular muscle
230	1.30455e-30	0.684244	0.343	0.169	4.3752e-26	0	ENSG00000074181	NOTCH3	extraocular muscle
231	7.36595e-110	0.683419	0.975	0.947	2.47039e-105	0	ENSG00000105640	RPL18A	extraocular muscle
232	1.90249e-137	0.681335	0.989	0.98	6.38057e-133	0	ENSG00000142541	RPL13A	extraocular muscle
233	3.47623e-10	0.679393	0.374	0.315	1.16586e-05	0	ENSG00000130811	EIF3G	extraocular muscle
234	1.94654e-34	0.675803	0.182	0.053	6.52831e-30	0	ENSG00000064300	NGFR	extraocular muscle
235	7.04329e-103	0.674383	0.98	0.939	2.36218e-98	0	ENSG00000197728	RPS26	extraocular muscle
236	1.06486e-54	0.673342	0.172	0.03	3.57133e-50	0	ENSG00000150893	FREM2	extraocular muscle
237	7.41844e-47	0.671676	0.846	0.777	2.488e-42	0	ENSG00000145741	BTF3	extraocular muscle
238	9.4145e-32	0.668604	0.226	0.083	3.15743e-27	0	ENSG00000131435	PDLIM4	extraocular muscle
239	5.87367e-74	0.667982	0.145	0.012	1.96991e-69	0	ENSG00000178821	TMEM52	extraocular muscle
240	1.27212e-39	0.662099	0.176	0.045	4.26642e-35	0	ENSG00000173210	ABLIM3	extraocular muscle
241	6.52605e-112	0.659057	0.989	0.969	2.18871e-107	0	ENSG00000110700	RPS13	extraocular muscle
242	3.28346e-21	0.657865	0.547	0.448	1.10121e-16	0	ENSG00000099800	TIMM13	extraocular muscle
243	2.19159e-25	0.656871	0.63	0.513	7.35017e-21	0	ENSG00000102316	MAGED2	extraocular muscle
244	7.20867e-08	0.655635	0.354	0.311	0.00241764	0	ENSG00000114416	FXR1	extraocular muscle
245	4.58306e-17	0.653041	0.526	0.455	1.53707e-12	0	ENSG00000134590	RTL8C	extraocular muscle
246	7.53769e-52	0.652301	0.178	0.034	2.52799e-47	0	ENSG00000156804	FBXO32	extraocular muscle
247	2.12175e-05	0.65056	0.276	0.242	0.711594	0	ENSG00000022277	RTF2	extraocular muscle
248	4.16203e-92	0.649259	0.135	0.004	1.39586e-87	0	ENSG00000009709	PAX7	extraocular muscle
249	4.93594e-20	0.648685	0.324	0.187	1.65542e-15	0	ENSG00000197043	ANXA6	extraocular muscle
250	2.82759e-09	0.6457	0.426	0.386	9.48316e-05	0	ENSG00000146066	HIGD2A	extraocular muscle
251	1.12572e-61	0.644852	0.151	0.018	3.77544e-57	0	ENSG00000135636	DYSF	extraocular muscle
252	2.33603e-18	0.641381	0.441	0.321	7.83457e-14	0	ENSG00000126457	PRMT1	extraocular muscle
253	1.68628e-100	0.640199	0.983	0.965	5.65545e-96	0	ENSG00000163682	RPL9	extraocular muscle
254	8.29201e-35	0.640136	0.185	0.054	2.78097e-30	0	ENSG00000082196	C1QTNF3	extraocular muscle
255	8.37169e-12	0.639787	0.425	0.369	2.8077e-07	0	ENSG00000174917	C19orf70	extraocular muscle
256	1.09074e-49	0.639703	0.172	0.034	3.65811e-45	0	ENSG00000164708	PGAM2	extraocular muscle
257	1.10476e-56	0.637576	0.161	0.025	3.70516e-52	0	ENSG00000188176	SMTNL2	extraocular muscle
258	2.3834e-46	0.633955	0.181	0.04	7.99346e-42	0	ENSG00000140403	DNAJA4	extraocular muscle
259	6.45226e-71	0.633825	0.138	0.011	2.16396e-66	0	ENSG00000101892	ATP1B4	extraocular muscle
260	7.46654e-24	0.633581	0.197	0.079	2.50413e-19	0	ENSG00000116584	ARHGEF2	extraocular muscle
261	6.29385e-83	0.631602	0.148	0.009	2.11083e-78	0	ENSG00000147166	ITGB1BP2	extraocular muscle
262	1.80329e-37	0.630436	0.279	0.103	6.04788e-33	0	ENSG00000076716	GPC4	extraocular muscle
263	3.11637e-86	0.630093	0.968	0.933	1.04517e-81	0	ENSG00000171863	RPS7	extraocular muscle
264	5.34219e-108	0.629857	0.992	0.971	1.79166e-103	0	ENSG00000145425	RPS3A	extraocular muscle
265	4.67353e-08	0.625258	0.403	0.351	0.00156741	0	ENSG00000129757	CDKN1C	extraocular muscle
266	1.24702e-40	0.623424	0.214	0.061	4.18227e-36	0	ENSG00000180730	SHISA2	extraocular muscle
267	1.38202e-101	0.622021	0.982	0.964	4.63502e-97	0	ENSG00000233927	RPS28	extraocular muscle
268	9.99065e-17	0.619387	0.186	0.093	3.35066e-12	0	ENSG00000136842	TMOD1	extraocular muscle
269	1.65569e-75	0.61866	0.145	0.011	5.55286e-71	0	ENSG00000111049	MYF5	extraocular muscle
270	4.18263e-31	0.616658	0.176	0.054	1.40277e-26	0	ENSG00000260807	AC009041.2	extraocular muscle
271	1.23892e-60	0.6161	0.144	0.016	4.15509e-56	0	ENSG00000106078	COBL	extraocular muscle
272	1.00265e-44	0.614121	0.182	0.042	3.36267e-40	0	ENSG00000095209	TMEM38B	extraocular muscle
273	1.52246e-25	0.612157	0.344	0.186	5.10603e-21	0	ENSG00000142798	HSPG2	extraocular muscle
274	8.86365e-27	0.611587	0.262	0.117	2.97269e-22	0	ENSG00000089159	PXN	extraocular muscle
275	4.52673e-60	0.610064	0.133	0.013	1.51817e-55	0	ENSG00000164440	TXLNB	extraocular muscle
276	2.7851e-103	0.609301	0.993	0.978	9.34068e-99	0	ENSG00000134419	RPS15A	extraocular muscle
277	2.28977e-23	0.602789	0.636	0.537	7.67943e-19	0	ENSG00000075415	SLC25A3	extraocular muscle
278	4.18994e-16	0.600961	0.221	0.121	1.40522e-11	0	ENSG00000075914	EXOSC7	extraocular muscle
279	7.06605e-54	0.600019	0.138	0.018	2.36981e-49	0	ENSG00000130528	HRC	extraocular muscle
280	1.03129e-23	0.597894	0.165	0.059	3.45873e-19	0	ENSG00000076706	MCAM	extraocular muscle
281	4.2204e-30	0.593246	0.162	0.049	1.41544e-25	0	ENSG00000172159	FRMD3	extraocular muscle
282	1.42969e-73	0.589686	0.131	0.008	4.79489e-69	0	ENSG00000223855	AC147651.1	extraocular muscle
283	6.12589e-24	0.5894	0.2	0.08	2.0545e-19	0	ENSG00000165458	INPPL1	extraocular muscle
284	6.40222e-43	0.587863	0.632	0.353	2.14718e-38	0	ENSG00000078596	ITM2A	extraocular muscle
285	3.99168e-41	0.58728	0.166	0.039	1.33873e-36	0	ENSG00000165912	PACSIN3	extraocular muscle
286	4.60101e-07	0.587255	0.158	0.106	0.0154309	0	ENSG00000152137	HSPB8	extraocular muscle
287	3.26372e-16	0.586421	0.367	0.238	1.09459e-11	0	ENSG00000172037	LAMB2	extraocular muscle
288	2.7009e-112	0.586269	0.984	0.966	9.05827e-108	0	ENSG00000105372	RPS19	extraocular muscle
289	9.16936e-19	0.584929	0.269	0.142	3.07522e-14	0	ENSG00000230630	DNM3OS	extraocular muscle
290	1.25517e-35	0.584467	0.15	0.036	4.2096e-31	0	ENSG00000110002	VWA5A	extraocular muscle
291	1.91071e-25	0.581989	0.722	0.651	6.40813e-21	0	ENSG00000184076	UQCR10	extraocular muscle
292	5.56669e-59	0.581587	0.102	0.006	1.86696e-54	0	ENSG00000177238	TRIM72	extraocular muscle
293	9.69378e-37	0.581509	0.137	0.028	3.2511e-32	0	ENSG00000080573	COL5A3	extraocular muscle
294	0.00343659	0.579064	0.254	0.241	1	0	ENSG00000151729	SLC25A4	extraocular muscle
295	4.74552e-16	0.578771	0.302	0.186	1.59155e-11	0	ENSG00000092010	PSME1	extraocular muscle
296	1.86996e-45	0.577016	0.846	0.771	6.27147e-41	0	ENSG00000169020	ATP5ME	extraocular muscle
297	1.68153e-47	0.575998	0.91	0.834	5.63952e-43	0	ENSG00000167658	EEF2	extraocular muscle
298	5.13503e-14	0.574187	0.584	0.549	1.72219e-09	0	ENSG00000165502	RPL36AL	extraocular muscle
299	2.11907e-68	0.573168	0.938	0.913	7.10693e-64	0	ENSG00000221983	UBA52	extraocular muscle
300	1.29176e-97	0.572932	0.983	0.955	4.3323e-93	0	ENSG00000197958	RPL12	extraocular muscle
301	4.54141e-12	0.572202	0.529	0.496	1.5231e-07	0	ENSG00000178982	EIF3K	extraocular muscle
302	1.08046e-07	0.57133	0.443	0.424	0.00362364	0	ENSG00000138495	COX17	extraocular muscle
303	1.09491e-50	0.570997	0.906	0.872	3.67211e-46	0	ENSG00000170889	RPS9	extraocular muscle
304	2.98378e-30	0.569754	0.165	0.049	1.0007e-25	0	ENSG00000136153	LMO7	extraocular muscle
305	1.03527e-13	0.569659	0.23	0.135	3.4721e-09	0	ENSG00000136261	BZW2	extraocular muscle
306	4.90317e-90	0.568133	0.983	0.959	1.64442e-85	0	ENSG00000130255	RPL36	extraocular muscle
307	0.000274414	0.567262	0.244	0.215	1	0	ENSG00000072062	PRKACA	extraocular muscle
308	1.70043e-08	0.566963	0.264	0.191	0.000570289	0	ENSG00000198960	ARMCX6	extraocular muscle
309	3.93981e-87	0.566872	0.984	0.963	1.32133e-82	0	ENSG00000122026	RPL21	extraocular muscle
310	5.03538e-64	0.566501	0.124	0.01	1.68876e-59	0	ENSG00000186638	KIF24	extraocular muscle
311	9.88722e-27	0.566153	0.186	0.066	3.31598e-22	0	ENSG00000171843	MLLT3	extraocular muscle
312	1.30496e-66	0.56375	0.948	0.89	4.37658e-62	0	ENSG00000168028	RPSA	extraocular muscle
313	2.36464e-21	0.563377	0.196	0.082	7.93054e-17	0	ENSG00000101224	CDC25B	extraocular muscle
314	9.46201e-45	0.561553	0.134	0.022	3.17337e-40	0	ENSG00000018625	ATP1A2	extraocular muscle
315	1.03094e-38	0.559905	0.134	0.026	3.45758e-34	0	ENSG00000176909	MAMSTR	extraocular muscle
316	4.81718e-89	0.557958	0.997	0.98	1.61559e-84	0	ENSG00000109475	RPL34	extraocular muscle
317	5.08411e-74	0.557799	0.106	0.003	1.70511e-69	0	ENSG00000143028	SYPL2	extraocular muscle
318	1.10164e-24	0.557125	0.223	0.094	3.69469e-20	0	ENSG00000143494	VASH2	extraocular muscle
319	1.08593e-70	0.555305	0.952	0.938	3.64198e-66	0	ENSG00000198242	RPL23A	extraocular muscle
320	1.17117e-68	0.552355	0.966	0.931	3.92788e-64	0	ENSG00000100316	RPL3	extraocular muscle
321	1.76719e-38	0.552006	0.107	0.016	5.92681e-34	0	ENSG00000145949	MYLK4	extraocular muscle
322	5.76457e-18	0.552	0.212	0.103	1.93332e-13	0	ENSG00000183762	KREMEN1	extraocular muscle
323	0.000383479	0.551754	0.319	0.308	1	0	ENSG00000254772	EEF1G	extraocular muscle
324	1.38466e-46	0.551667	0.104	0.011	4.64388e-42	0	ENSG00000101203	COL20A1	extraocular muscle
325	3.96928e-15	0.550781	0.152	0.069	1.33122e-10	0	ENSG00000108387	2004-09-01	extraocular muscle
326	3.92344e-31	0.548189	0.151	0.041	1.31584e-26	0	ENSG00000164309	CMYA5	extraocular muscle
327	4.10348e-09	0.547898	0.154	0.091	0.000137623	0	ENSG00000143801	PSEN2	extraocular muscle
328	3.36462e-40	0.546397	0.168	0.038	1.12842e-35	0	ENSG00000126778	SIX1	extraocular muscle
329	3.85415e-67	0.545769	0.11	0.005	1.2926e-62	0	ENSG00000081248	CACNA1S	extraocular muscle
330	1.72974e-69	0.544856	0.118	0.007	5.80119e-65	0	ENSG00000174407	MIR1-1HG	extraocular muscle
331	2.32393e-80	0.544546	0.986	0.939	7.79401e-76	0	ENSG00000122406	RPL5	extraocular muscle
332	3.03646e-28	0.541642	0.203	0.073	1.01837e-23	0	ENSG00000179820	MYADM	extraocular muscle
333	1.84056e-76	0.54131	0.979	0.966	6.17286e-72	0	ENSG00000182899	RPL35A	extraocular muscle
334	7.39503e-13	0.541006	0.283	0.186	2.48014e-08	0	ENSG00000125827	TMX4	extraocular muscle
335	8.32913e-61	0.540149	0.953	0.938	2.79342e-56	0	ENSG00000147604	RPL7	extraocular muscle
336	9.58871e-12	0.53556	0.244	0.153	3.21586e-07	0	ENSG00000116871	MAP7D1	extraocular muscle
337	4.58164e-87	0.535125	0.996	0.975	1.53659e-82	0	ENSG00000138326	RPS24	extraocular muscle
338	1.92128e-15	0.535111	0.599	0.56	6.4436e-11	0	ENSG00000135940	COX5B	extraocular muscle
339	1.78527e-87	0.534727	0.972	0.966	5.98743e-83	0	ENSG00000164587	RPS14	extraocular muscle
340	5.26757e-27	0.534435	0.15	0.045	1.76664e-22	0	ENSG00000146373	RNF217	extraocular muscle
341	2.76481e-66	0.534385	0.118	0.007	9.27263e-62	0	ENSG00000163380	LMOD3	extraocular muscle
342	1.51436e-13	0.533487	0.13	0.057	5.07885e-09	0	ENSG00000061938	TNK2	extraocular muscle
343	4.37271e-26	0.533193	0.158	0.05	1.46652e-21	0	ENSG00000119699	TGFB3	extraocular muscle
344	2.91895e-16	0.530253	0.159	0.07	9.78957e-12	0	ENSG00000145604	SKP2	extraocular muscle
345	4.21118e-23	0.530078	0.217	0.091	1.41235e-18	0	ENSG00000266964	FXYD1	extraocular muscle
346	2.61166e-24	0.527848	0.234	0.097	8.759e-20	0	ENSG00000168477	TNXB	extraocular muscle
347	4.11443e-23	0.52749	0.158	0.056	1.3799e-18	0	ENSG00000163050	COQ8A	extraocular muscle
348	5.26461e-26	0.526907	0.173	0.058	1.76565e-21	0	ENSG00000003096	KLHL13	extraocular muscle
349	4.13543e-27	0.526803	0.128	0.034	1.38694e-22	0	ENSG00000172346	CSDC2	extraocular muscle
350	2.53964e-24	0.526481	0.202	0.078	8.51744e-20	0	ENSG00000138449	SLC40A1	extraocular muscle
351	1.33552e-55	0.525136	0.109	0.009	4.47905e-51	0	ENSG00000133454	MYO18B	extraocular muscle
352	1.62001e-24	0.524562	0.186	0.069	5.4332e-20	0	ENSG00000000971	CFH	extraocular muscle
353	9.56452e-55	0.523864	0.951	0.913	3.20775e-50	0	ENSG00000124614	RPS10	extraocular muscle
354	1.65412e-08	0.523601	0.162	0.099	0.000554759	0	ENSG00000107929	LARP4B	extraocular muscle
355	1.13318e-11	0.52233	0.371	0.274	3.80047e-07	0	ENSG00000196141	SPATS2L	extraocular muscle
356	4.39232e-09	0.52135	0.396	0.334	0.00014731	0	ENSG00000215021	PHB2	extraocular muscle
357	1.23198e-45	0.521297	0.103	0.011	4.13182e-41	0	ENSG00000158457	TSPAN33	extraocular muscle
358	2.46868e-18	0.52117	0.719	0.681	8.27946e-14	0	ENSG00000169100	SLC25A6	extraocular muscle
359	2.47286e-46	0.519921	0.135	0.021	8.29348e-42	0	ENSG00000105251	SHD	extraocular muscle
360	4.16628e-53	0.518448	0.118	0.012	1.39729e-48	0	ENSG00000164122	ASB5	extraocular muscle
361	4.10523e-22	0.516579	0.276	0.139	1.37681e-17	0	ENSG00000138764	CCNG2	extraocular muscle
362	1.1838e-71	0.514209	0.966	0.941	3.97023e-67	0	ENSG00000148303	RPL7A	extraocular muscle
363	3.46961e-64	0.512387	0.127	0.01	1.16364e-59	0	ENSG00000186439	TRDN	extraocular muscle
364	1.25307e-65	0.511909	0.118	0.008	4.20255e-61	0	ENSG00000079393	DUSP13	extraocular muscle
365	2.51152e-12	0.511842	0.158	0.079	8.42315e-08	0	ENSG00000180900	SCRIB	extraocular muscle
366	6.14227e-09	0.509249	0.245	0.172	0.000205999	0	ENSG00000175928	LRRN1	extraocular muscle
367	1.8249e-08	0.506093	0.47	0.45	0.000612034	0	ENSG00000183172	SMDT1	extraocular muscle
368	4.24577e-41	0.504917	0.911	0.855	1.42395e-36	0	ENSG00000182774	RPS17	extraocular muscle
369	3.38995e-25	0.502994	0.144	0.044	1.13692e-20	0	ENSG00000173546	CSPG4	extraocular muscle
370	5.0413e-90	0.500846	0.99	0.967	1.69075e-85	0	ENSG00000140988	RPS2	extraocular muscle
371	4.19819e-217	2.36986	0.844	0.392	1.40799e-212	1	ENSG00000106809	OGN	periocular mesenchyme
372	5.98886e-277	2.29639	0.985	0.837	2.00854e-272	1	ENSG00000113140	SPARC	periocular mesenchyme
373	4.66367e-279	2.2804	0.997	0.926	1.5641e-274	1	ENSG00000164692	COL1A2	periocular mesenchyme
374	3.24884e-256	2.08341	0.997	0.903	1.0896e-251	1	ENSG00000108821	COL1A1	periocular mesenchyme
375	6.21919e-195	2.02211	0.87	0.449	2.08579e-190	1	ENSG00000111799	COL12A1	periocular mesenchyme
376	1.51775e-131	1.91359	0.364	0.06	5.09023e-127	1	ENSG00000181195	PENK	periocular mesenchyme
377	5.15413e-113	1.80137	0.508	0.166	1.72859e-108	1	ENSG00000060718	COL11A1	periocular mesenchyme
378	2.24175e-151	1.79107	0.473	0.096	7.51837e-147	1	ENSG00000106819	ASPN	periocular mesenchyme
379	9.85126e-120	1.75696	0.581	0.202	3.30392e-115	1	ENSG00000186340	THBS2	periocular mesenchyme
380	7.34457e-153	1.75393	0.437	0.076	2.46322e-148	1	ENSG00000106483	SFRP4	periocular mesenchyme
381	2.86099e-145	1.73358	0.514	0.127	9.59519e-141	1	ENSG00000164932	CTHRC1	periocular mesenchyme
382	7.18084e-217	1.71073	0.994	0.887	2.40831e-212	1	ENSG00000168542	COL3A1	periocular mesenchyme
383	2.69682e-94	1.5256	0.655	0.339	9.0446e-90	1	ENSG00000106333	PCOLCE	periocular mesenchyme
384	6.98234e-167	1.51396	0.95	0.675	2.34174e-162	1	ENSG00000011465	DCN	periocular mesenchyme
385	1.41302e-96	1.51111	0.739	0.499	4.73898e-92	1	ENSG00000189129	PLAC9	periocular mesenchyme
386	8.9338e-92	1.50038	0.569	0.228	2.99622e-87	1	ENSG00000113083	LOX	periocular mesenchyme
387	6.35282e-80	1.49586	0.499	0.212	2.13061e-75	1	ENSG00000049323	LTBP1	periocular mesenchyme
388	3.42034e-101	1.46899	0.812	0.532	1.14712e-96	1	ENSG00000163430	FSTL1	periocular mesenchyme
389	2.40125e-78	1.41657	0.519	0.23	8.0533e-74	1	ENSG00000116774	OLFML3	periocular mesenchyme
390	1.74004e-96	1.35677	0.779	0.494	5.83576e-92	1	ENSG00000115461	IGFBP5	periocular mesenchyme
391	1.28822e-61	1.34893	0.379	0.144	4.32043e-57	1	ENSG00000171812	COL8A2	periocular mesenchyme
392	3.15586e-69	1.34252	0.464	0.19	1.05841e-64	1	ENSG00000187955	COL14A1	periocular mesenchyme
393	3.55975e-49	1.30526	0.476	0.262	1.19387e-44	1	ENSG00000102265	TIMP1	periocular mesenchyme
394	8.21053e-70	1.26898	0.551	0.264	2.75365e-65	1	ENSG00000049540	ELN	periocular mesenchyme
395	8.70262e-110	1.24923	0.865	0.697	2.91869e-105	1	ENSG00000277443	MARCKS	periocular mesenchyme
396	1.25795e-100	1.24292	0.766	0.412	4.21891e-96	1	ENSG00000111341	MGP	periocular mesenchyme
397	1.16993e-74	1.24242	0.604	0.312	3.9237e-70	1	ENSG00000138829	FBN2	periocular mesenchyme
398	7.98411e-50	1.21644	0.473	0.239	2.67771e-45	1	ENSG00000075223	SEMA3C	periocular mesenchyme
399	5.33329e-119	1.18018	0.916	0.774	1.78868e-114	1	ENSG00000100097	LGALS1	periocular mesenchyme
400	3.1153e-66	1.17101	0.284	0.073	1.04481e-61	1	ENSG00000204472	AIF1	periocular mesenchyme
401	1.81744e-43	1.16531	0.57	0.378	6.09532e-39	1	ENSG00000077942	FBLN1	periocular mesenchyme
402	1.57608e-54	1.15889	0.41	0.173	5.28585e-50	1	ENSG00000122176	FMOD	periocular mesenchyme
403	6.19537e-52	1.14474	0.59	0.374	2.0778e-47	1	ENSG00000117122	MFAP2	periocular mesenchyme
404	1.05103e-45	1.10716	0.428	0.211	3.52495e-41	1	ENSG00000169604	ANTXR1	periocular mesenchyme
405	3.42777e-37	1.10708	0.276	0.11	1.14961e-32	1	ENSG00000119147	C2orf40	periocular mesenchyme
406	2.68608e-47	1.10193	0.468	0.236	9.00858e-43	1	ENSG00000166482	MFAP4	periocular mesenchyme
407	2.69171e-43	1.09848	0.416	0.21	9.02746e-39	1	ENSG00000143320	CRABP2	periocular mesenchyme
408	2.20861e-37	1.09323	0.573	0.456	7.40723e-33	1	ENSG00000136240	KDELR2	periocular mesenchyme
409	7.23997e-48	1.09201	0.526	0.298	2.42814e-43	1	ENSG00000087245	MMP2	periocular mesenchyme
410	3.19907e-51	1.08699	0.69	0.435	1.0729e-46	1	ENSG00000133110	POSTN	periocular mesenchyme
411	2.45149e-39	1.07813	0.382	0.192	8.2218e-35	1	ENSG00000143013	LMO4	periocular mesenchyme
412	9.10099e-38	1.06455	0.342	0.159	3.05229e-33	1	ENSG00000143387	CTSK	periocular mesenchyme
413	1.0166e-35	1.03732	0.286	0.116	3.40947e-31	1	ENSG00000164694	FNDC1	periocular mesenchyme
414	1.68895e-46	1.03612	0.639	0.45	5.66441e-42	1	ENSG00000106484	MEST	periocular mesenchyme
415	1.02258e-32	1.02327	0.335	0.165	3.42952e-28	1	ENSG00000140092	FBLN5	periocular mesenchyme
416	3.09644e-26	1.01531	0.532	0.436	1.03848e-21	1	ENSG00000102804	TSC22D1	periocular mesenchyme
417	1.35164e-33	1.00999	0.264	0.107	4.53312e-29	1	ENSG00000157613	CREB3L1	periocular mesenchyme
418	4.81927e-34	1.00342	0.499	0.31	1.61629e-29	1	ENSG00000166147	FBN1	periocular mesenchyme
419	1.28076e-50	0.993047	0.631	0.398	4.29542e-46	1	ENSG00000163191	S100A11	periocular mesenchyme
420	1.78259e-31	0.98945	0.496	0.339	5.97847e-27	1	ENSG00000164111	ANXA5	periocular mesenchyme
421	8.50822e-40	0.976775	0.228	0.073	2.85349e-35	1	ENSG00000112773	TENT5A	periocular mesenchyme
422	6.19064e-34	0.975349	0.455	0.267	2.07622e-29	1	ENSG00000131016	AKAP12	periocular mesenchyme
423	1.08688e-69	0.964654	0.157	0.017	3.64516e-65	1	ENSG00000157766	ACAN	periocular mesenchyme
424	7.28356e-28	0.951838	0.221	0.084	2.44276e-23	1	ENSG00000197614	MFAP5	periocular mesenchyme
425	1.11342e-37	0.946128	0.341	0.153	3.7342e-33	1	ENSG00000198759	EGFL6	periocular mesenchyme
426	5.01337e-78	0.945347	0.781	0.494	1.68138e-73	1	ENSG00000204262	COL5A2	periocular mesenchyme
427	5.405e-47	0.936103	0.662	0.419	1.81273e-42	1	ENSG00000115414	FN1	periocular mesenchyme
428	1.44959e-38	0.93281	0.545	0.351	4.86163e-34	1	ENSG00000132386	SERPINF1	periocular mesenchyme
429	2.39976e-24	0.930871	0.399	0.247	8.0483e-20	1	ENSG00000105894	PTN	periocular mesenchyme
430	5.8494e-15	0.929935	0.419	0.343	1.96177e-10	1	ENSG00000100234	TIMP3	periocular mesenchyme
431	8.74417e-35	0.92644	0.262	0.101	2.93262e-30	1	ENSG00000104213	PDGFRL	periocular mesenchyme
432	7.26125e-29	0.917436	0.227	0.092	2.43528e-24	1	ENSG00000018236	CNTN1	periocular mesenchyme
433	2.11808e-24	0.911292	0.255	0.122	7.10361e-20	1	ENSG00000144857	BOC	periocular mesenchyme
434	3.73717e-23	0.896775	0.376	0.242	1.25337e-18	1	ENSG00000169439	SDC2	periocular mesenchyme
435	3.26906e-09	0.89618	0.271	0.191	0.000109638	1	ENSG00000113296	THBS4	periocular mesenchyme
436	1.84449e-36	0.893786	0.601	0.426	6.18606e-32	1	ENSG00000118971	CCND2	periocular mesenchyme
437	8.32141e-37	0.884934	0.643	0.506	2.79084e-32	1	ENSG00000110651	CD81	periocular mesenchyme
438	2.87816e-13	0.879363	0.45	0.428	9.65277e-09	1	ENSG00000123131	PRDX4	periocular mesenchyme
439	1.33113e-30	0.876273	0.342	0.175	4.46435e-26	1	ENSG00000142227	EMP3	periocular mesenchyme
440	2.49138e-29	0.871792	0.378	0.201	8.3556e-25	1	ENSG00000107562	CXCL12	periocular mesenchyme
441	2.76639e-33	0.869656	0.572	0.41	9.27793e-29	1	ENSG00000166710	B2M	periocular mesenchyme
442	4.63933e-15	0.85702	0.437	0.371	1.55594e-10	1	ENSG00000168374	ARF4	periocular mesenchyme
443	3.01069e-48	0.855836	0.191	0.042	1.00972e-43	1	ENSG00000143196	DPT	periocular mesenchyme
444	4.56713e-28	0.851307	0.203	0.076	1.53172e-23	1	ENSG00000005243	COPZ2	periocular mesenchyme
445	4.49762e-22	0.848909	0.601	0.573	1.50841e-17	1	ENSG00000260032	NORAD	periocular mesenchyme
446	9.38302e-28	0.843212	0.452	0.284	3.14688e-23	1	ENSG00000084636	COL16A1	periocular mesenchyme
447	8.1391e-29	0.837926	0.277	0.123	2.72969e-24	1	ENSG00000155011	DKK2	periocular mesenchyme
448	3.86296e-21	0.835057	0.326	0.19	1.29556e-16	1	ENSG00000137573	SULF1	periocular mesenchyme
449	2.15208e-32	0.83164	0.71	0.649	7.21765e-28	1	ENSG00000110492	MDK	periocular mesenchyme
450	2.05309e-23	0.831428	0.447	0.301	6.88565e-19	1	ENSG00000124942	AHNAK	periocular mesenchyme
451	2.54752e-06	0.831036	0.37	0.366	0.0854387	1	ENSG00000050165	DKK3	periocular mesenchyme
452	8.96218e-23	0.82716	0.35	0.206	3.00574e-18	1	ENSG00000137070	IL11RA	periocular mesenchyme
453	1.69482e-13	0.823315	0.237	0.144	5.68409e-09	1	ENSG00000118523	CTGF	periocular mesenchyme
454	1.58862e-63	0.820461	0.742	0.484	5.3279e-59	1	ENSG00000130635	COL5A1	periocular mesenchyme
455	6.56561e-22	0.818863	0.344	0.202	2.20197e-17	1	ENSG00000184613	NELL2	periocular mesenchyme
456	4.05547e-23	0.815861	0.237	0.111	1.36012e-18	1	ENSG00000054598	FOXC1	periocular mesenchyme
457	4.689e-07	0.80927	0.359	0.311	0.015726	1	ENSG00000145423	SFRP2	periocular mesenchyme
458	1.91675e-22	0.799731	0.164	0.061	6.42838e-18	1	ENSG00000168140	VASN	periocular mesenchyme
459	1.50424e-24	0.799565	0.219	0.094	5.04493e-20	1	ENSG00000079150	FKBP7	periocular mesenchyme
460	8.12719e-21	0.795067	0.23	0.11	2.7257e-16	1	ENSG00000156103	MMP16	periocular mesenchyme
461	6.33487e-16	0.794761	0.344	0.235	2.12459e-11	1	ENSG00000136026	CKAP4	periocular mesenchyme
462	2.16689e-91	0.788737	0.99	0.96	7.26733e-87	1	ENSG00000198899	MT-ATP6	periocular mesenchyme
463	8.56855e-30	0.782561	0.194	0.067	2.87372e-25	1	ENSG00000100196	KDELR3	periocular mesenchyme
464	3.42915e-10	0.782503	0.268	0.192	1.15007e-05	1	ENSG00000067167	TRAM1	periocular mesenchyme
465	1.8351e-17	0.780003	0.253	0.139	6.15456e-13	1	ENSG00000087116	ADAMTS2	periocular mesenchyme
466	3.10665e-21	0.776815	0.603	0.547	1.04191e-16	1	ENSG00000197956	S100A6	periocular mesenchyme
467	2.28932e-80	0.776193	0.972	0.95	7.6779e-76	1	ENSG00000198727	MT-CYB	periocular mesenchyme
468	8.89659e-19	0.774201	0.323	0.189	2.98374e-14	1	ENSG00000101825	MXRA5	periocular mesenchyme
469	1.2477e-11	0.770964	0.536	0.539	4.18455e-07	1	ENSG00000067560	RHOA	periocular mesenchyme
470	5.0061e-12	0.767431	0.256	0.168	1.67895e-07	1	ENSG00000170275	CRTAP	periocular mesenchyme
471	5.28581e-18	0.763536	0.203	0.098	1.77276e-13	1	ENSG00000137801	THBS1	periocular mesenchyme
472	1.58766e-18	0.754051	0.273	0.152	5.32469e-14	1	ENSG00000140937	CDH11	periocular mesenchyme
473	7.95966e-19	0.751811	0.415	0.286	2.66951e-14	1	ENSG00000141753	IGFBP4	periocular mesenchyme
474	1.76606e-15	0.751706	0.413	0.316	5.923e-11	1	ENSG00000128595	CALU	periocular mesenchyme
475	5.52236e-07	0.751198	0.462	0.497	0.0185209	1	ENSG00000255302	EID1	periocular mesenchyme
476	5.0678e-28	0.735262	0.55	0.375	1.69964e-23	1	ENSG00000131711	MAP1B	periocular mesenchyme
477	9.64185e-31	0.723721	0.79	0.783	3.23368e-26	1	ENSG00000198763	MT-ND2	periocular mesenchyme
478	1.69581e-07	0.713593	0.308	0.254	0.00568742	1	ENSG00000138674	SEC31A	periocular mesenchyme
479	8.60486e-12	0.713276	0.271	0.183	2.8859e-07	1	ENSG00000151135	TMEM263	periocular mesenchyme
480	2.14512e-09	0.708206	0.505	0.529	7.19429e-05	1	ENSG00000180879	SSR4	periocular mesenchyme
481	4.14538e-11	0.707516	0.474	0.436	1.39028e-06	1	ENSG00000185624	P4HB	periocular mesenchyme
482	5.28696e-08	0.704314	0.329	0.278	0.00177314	1	ENSG00000186395	KRT10	periocular mesenchyme
483	2.2185e-20	0.703767	0.316	0.184	7.4404e-16	1	ENSG00000182492	BGN	periocular mesenchyme
484	3.71804e-09	0.699098	0.345	0.274	0.000124696	1	ENSG00000167460	TPM4	periocular mesenchyme
485	3.36155e-08	0.699097	0.452	0.446	0.0011274	1	ENSG00000035862	TIMP2	periocular mesenchyme
486	1.32501e-05	0.698663	0.353	0.327	0.444382	1	ENSG00000198856	OSTC	periocular mesenchyme
487	1.78172e-13	0.698007	0.273	0.173	5.97553e-09	1	ENSG00000125844	RRBP1	periocular mesenchyme
488	5.99724e-15	0.689201	0.234	0.133	2.01135e-10	1	ENSG00000198963	RORB	periocular mesenchyme
489	3.66544e-20	0.688938	0.185	0.078	1.22931e-15	1	ENSG00000145861	C1QTNF2	periocular mesenchyme
490	8.72932e-38	0.68846	0.139	0.028	2.92764e-33	1	ENSG00000137558	PI15	periocular mesenchyme
491	3.11057e-16	0.687883	0.428	0.315	1.04322e-11	1	ENSG00000113657	DPYSL3	periocular mesenchyme
492	8.29738e-16	0.686973	0.23	0.125	2.78277e-11	1	ENSG00000196776	CD47	periocular mesenchyme
493	2.33263e-16	0.686109	0.618	0.625	7.82318e-12	1	ENSG00000185787	MORF4L1	periocular mesenchyme
494	7.0023e-80	0.677372	0.996	0.976	2.34843e-75	1	ENSG00000198938	MT-CO3	periocular mesenchyme
495	1.24539e-12	0.677339	0.53	0.507	4.17679e-08	1	ENSG00000117519	CNN3	periocular mesenchyme
496	3.43898e-05	0.675168	0.225	0.183	1	1	ENSG00000074695	LMAN1	periocular mesenchyme
497	3.74529e-10	0.674114	0.283	0.2	1.2561e-05	1	ENSG00000131747	TOP2A	periocular mesenchyme
498	1.56828e-21	0.673161	0.16	0.06	5.25971e-17	1	ENSG00000142552	RCN3	periocular mesenchyme
499	1.63812e-09	0.671436	0.258	0.179	5.49392e-05	1	ENSG00000011028	MRC2	periocular mesenchyme
500	2.49219e-55	0.670612	0.123	0.012	8.35832e-51	1	ENSG00000127083	OMD	periocular mesenchyme
501	3.08807e-52	0.669368	0.748	0.555	1.03568e-47	1	ENSG00000139329	LUM	periocular mesenchyme
502	4.84734e-17	0.666525	0.476	0.366	1.6257e-12	1	ENSG00000149257	SERPINH1	periocular mesenchyme
503	6.10281e-54	0.664123	0.887	0.904	2.04676e-49	1	ENSG00000140264	SERF2	periocular mesenchyme
504	1.70245e-09	0.661796	0.489	0.48	5.70968e-05	1	ENSG00000069275	NUCKS1	periocular mesenchyme
505	4.05626e-08	0.660226	0.431	0.4	0.00136039	1	ENSG00000150093	ITGB1	periocular mesenchyme
506	8.45486e-09	0.659969	0.474	0.468	0.000283559	1	ENSG00000106803	SEC61B	periocular mesenchyme
507	6.85478e-67	0.659447	0.987	0.965	2.29895e-62	1	ENSG00000198886	MT-ND4	periocular mesenchyme
508	1.89739e-18	0.657904	0.176	0.077	6.36345e-14	1	ENSG00000118257	NRP2	periocular mesenchyme
509	6.61315e-12	0.656096	0.372	0.277	2.21792e-07	1	ENSG00000152661	GJA1	periocular mesenchyme
510	4.38502e-05	0.654283	0.253	0.214	1	1	ENSG00000164985	PSIP1	periocular mesenchyme
511	8.6554e-08	0.654127	0.35	0.302	0.00290285	1	ENSG00000128951	DUT	periocular mesenchyme
512	1.56366e-17	0.653145	0.163	0.07	5.24421e-13	1	ENSG00000122870	BICC1	periocular mesenchyme
513	7.14674e-18	0.653016	0.175	0.076	2.39687e-13	1	ENSG00000183160	TMEM119	periocular mesenchyme
514	2.24434e-13	0.652804	0.459	0.359	7.52707e-09	1	ENSG00000115457	IGFBP2	periocular mesenchyme
515	2.32811e-05	0.652003	0.453	0.481	0.780803	1	ENSG00000105223	PLD3	periocular mesenchyme
516	1.57902e-10	0.65011	0.267	0.183	5.29571e-06	1	ENSG00000185070	FLRT2	periocular mesenchyme
517	0.000667971	0.648632	0.279	0.259	1	1	ENSG00000123989	CHPF	periocular mesenchyme
518	1.12845e-11	0.648093	0.441	0.349	3.78458e-07	1	ENSG00000178695	KCTD12	periocular mesenchyme
519	5.70359e-05	0.647649	0.301	0.268	1	1	ENSG00000079332	SAR1A	periocular mesenchyme
520	1.72298e-17	0.646102	0.67	0.647	5.77852e-13	1	ENSG00000198786	MT-ND5	periocular mesenchyme
521	2.39993e-09	0.645494	0.243	0.166	8.04889e-05	1	ENSG00000149131	SERPING1	periocular mesenchyme
522	0.000160959	0.642897	0.206	0.168	1	1	ENSG00000120805	ARL1	periocular mesenchyme
523	1.5467e-05	0.641257	0.156	0.107	0.518733	1	ENSG00000184347	SLIT3	periocular mesenchyme
524	2.2834e-16	0.640883	0.141	0.057	7.65806e-12	1	ENSG00000152580	IGSF10	periocular mesenchyme
525	2.16064e-06	0.640682	0.431	0.414	0.0724635	1	ENSG00000136810	TXN	periocular mesenchyme
526	2.24544e-09	0.640061	0.399	0.33	7.53076e-05	1	ENSG00000124766	SOX4	periocular mesenchyme
527	5.88616e-32	0.639321	0.123	0.026	1.9741e-27	1	ENSG00000173698	ADGRG2	periocular mesenchyme
528	2.04241e-24	0.636228	0.156	0.051	6.84985e-20	1	ENSG00000153823	PID1	periocular mesenchyme
529	1.12265e-11	0.635065	0.295	0.199	3.76514e-07	1	ENSG00000164093	PITX2	periocular mesenchyme
530	2.71093e-10	0.634902	0.443	0.386	9.09193e-06	1	ENSG00000102317	RBM3	periocular mesenchyme
531	2.67153e-08	0.629456	0.204	0.136	0.000895978	1	ENSG00000170017	ALCAM	periocular mesenchyme
532	3.09528e-11	0.629245	0.456	0.393	1.0381e-06	1	ENSG00000092964	DPYSL2	periocular mesenchyme
533	7.23509e-15	0.626586	0.615	0.612	2.4265e-10	1	ENSG00000188612	SUMO2	periocular mesenchyme
534	4.65922e-11	0.624207	0.524	0.505	1.56261e-06	1	ENSG00000166598	HSP90B1	periocular mesenchyme
535	0.000111831	0.623483	0.375	0.376	1	1	ENSG00000118705	RPN2	periocular mesenchyme
536	9.12543e-06	0.62102	0.467	0.501	0.306049	1	ENSG00000182670	TTC3	periocular mesenchyme
537	6.96777e-06	0.610212	0.444	0.438	0.233685	1	ENSG00000112081	SRSF3	periocular mesenchyme
538	4.70501e-13	0.608574	0.476	0.396	1.57797e-08	1	ENSG00000068697	LAPTM4A	periocular mesenchyme
539	6.32915e-09	0.607558	0.181	0.112	0.000212267	1	ENSG00000198380	GFPT1	periocular mesenchyme
540	1.80588e-05	0.605061	0.227	0.176	0.605656	1	ENSG00000168214	RBPJ	periocular mesenchyme
541	1.02131e-09	0.604053	0.596	0.625	3.42529e-05	1	ENSG00000111678	C12orf57	periocular mesenchyme
542	2.5394e-09	0.603114	0.576	0.627	8.51662e-05	1	ENSG00000189403	HMGB1	periocular mesenchyme
543	4.91185e-08	0.602191	0.286	0.218	0.00164734	1	ENSG00000185222	TCEAL9	periocular mesenchyme
544	0.00116913	0.601464	0.164	0.13	1	1	ENSG00000281508	AL078639.1	periocular mesenchyme
545	6.9711e-10	0.601224	0.501	0.471	2.33797e-05	1	ENSG00000118816	CCNI	periocular mesenchyme
546	1.69956e-49	0.600374	0.902	0.904	5.7e-45	1	ENSG00000075624	ACTB	periocular mesenchyme
547	0.00917861	0.600215	0.25	0.238	1	1	ENSG00000124783	SSR1	periocular mesenchyme
548	9.29784e-10	0.598796	0.2	0.123	3.11831e-05	1	ENSG00000169184	MN1	periocular mesenchyme
549	0.00680398	0.598542	0.274	0.267	1	1	ENSG00000120742	SERP1	periocular mesenchyme
550	2.84806e-22	0.597177	0.132	0.041	9.55184e-18	1	ENSG00000114698	PLSCR4	periocular mesenchyme
551	0.000433179	0.593044	0.335	0.322	1	1	ENSG00000123384	LRP1	periocular mesenchyme
552	4.00759e-07	0.591866	0.342	0.293	0.0134407	1	ENSG00000105968	H2AFV	periocular mesenchyme
553	5.66084e-07	0.591809	0.296	0.233	0.0189853	1	ENSG00000158164	TMSB15A	periocular mesenchyme
554	6.74609e-11	0.591391	0.172	0.096	2.2625e-06	1	ENSG00000146242	TPBG	periocular mesenchyme
555	1.73875e-10	0.590805	0.218	0.135	5.8314e-06	1	ENSG00000071967	CYBRD1	periocular mesenchyme
556	3.73546e-09	0.590626	0.204	0.13	0.00012528	1	ENSG00000120820	GLT8D2	periocular mesenchyme
557	5.09905e-10	0.588612	0.188	0.114	1.71012e-05	1	ENSG00000070081	NUCB2	periocular mesenchyme
558	7.76189e-11	0.587946	0.148	0.077	2.60318e-06	1	ENSG00000168938	PPIC	periocular mesenchyme
559	6.50465e-14	0.587553	0.153	0.071	2.18153e-09	1	ENSG00000106080	FKBP14	periocular mesenchyme
560	1.07988e-09	0.586665	0.397	0.318	3.62171e-05	1	ENSG00000038427	VCAN	periocular mesenchyme
561	1.03403e-08	0.586604	0.367	0.304	0.000346795	1	ENSG00000109099	PMP22	periocular mesenchyme
562	3.59388e-26	0.584453	0.136	0.038	1.20532e-21	1	ENSG00000134533	RERG	periocular mesenchyme
563	0.00011405	0.584235	0.326	0.298	1	1	ENSG00000101856	PGRMC1	periocular mesenchyme
564	1.28835e-05	0.583144	0.424	0.432	0.432086	1	ENSG00000070087	PFN2	periocular mesenchyme
565	9.47781e-11	0.582474	0.136	0.068	3.17867e-06	1	ENSG00000171451	DSEL	periocular mesenchyme
566	1.41795e-08	0.581088	0.179	0.112	0.000475551	1	ENSG00000136161	RCBTB2	periocular mesenchyme
567	1.20097e-09	0.580537	0.176	0.103	4.02782e-05	1	ENSG00000150961	SEC24D	periocular mesenchyme
568	1.53231e-32	0.580345	0.867	0.877	5.13907e-28	1	ENSG00000163041	H3F3A	periocular mesenchyme
569	2.87804e-14	0.579905	0.32	0.205	9.65236e-10	1	ENSG00000147257	GPC3	periocular mesenchyme
570	1.32344e-87	0.579454	0.987	0.977	4.43856e-83	1	ENSG00000133112	TPT1	periocular mesenchyme
571	7.11524e-39	0.578918	0.862	0.82	2.38631e-34	1	ENSG00000187514	PTMA	periocular mesenchyme
572	3.10702e-07	0.578855	0.244	0.179	0.0104203	1	ENSG00000150687	PRSS23	periocular mesenchyme
573	7.79248e-08	0.578621	0.25	0.181	0.00261344	1	ENSG00000172638	EFEMP2	periocular mesenchyme
574	3.74476e-44	0.577937	0.107	0.012	1.25592e-39	1	ENSG00000145358	DDIT4L	periocular mesenchyme
575	1.46497e-14	0.577859	0.679	0.643	4.91322e-10	1	ENSG00000197747	S100A10	periocular mesenchyme
576	3.77901e-19	0.57589	0.129	0.045	1.26741e-14	1	ENSG00000173376	NDNF	periocular mesenchyme
577	0.000172604	0.574593	0.378	0.368	1	1	ENSG00000177733	HNRNPA0	periocular mesenchyme
578	0.000555317	0.572461	0.246	0.218	1	1	ENSG00000157020	SEC13	periocular mesenchyme
579	1.13923e-07	0.572014	0.2	0.136	0.00382073	1	ENSG00000141756	FKBP10	periocular mesenchyme
580	5.76303e-53	0.569935	0.991	0.964	1.9328e-48	1	ENSG00000198840	MT-ND3	periocular mesenchyme
581	7.90778e-10	0.569505	0.227	0.144	2.65211e-05	1	ENSG00000167779	IGFBP6	periocular mesenchyme
582	3.54564e-06	0.56829	0.129	0.08	0.118914	1	ENSG00000114450	GNB4	periocular mesenchyme
583	3.93857e-07	0.568273	0.176	0.116	0.0132092	1	ENSG00000198832	SELENOM	periocular mesenchyme
584	9.45328e-11	0.564099	0.157	0.083	3.17044e-06	1	ENSG00000170891	CYTL1	periocular mesenchyme
585	4.46138e-06	0.562679	0.256	0.198	0.149626	1	ENSG00000134250	NOTCH2	periocular mesenchyme
586	7.82015e-16	0.558293	0.119	0.044	2.62272e-11	1	ENSG00000187720	THSD4	periocular mesenchyme
587	1.73379e-14	0.557495	0.69	0.756	5.81479e-10	1	ENSG00000188243	COMMD6	periocular mesenchyme
588	8.51541e-07	0.556882	0.53	0.528	0.028559	1	ENSG00000205581	HMGN1	periocular mesenchyme
589	0.00140329	0.556102	0.164	0.132	1	1	ENSG00000112851	ERBIN	periocular mesenchyme
590	5.69926e-11	0.556034	0.178	0.098	1.91142e-06	1	ENSG00000197712	FAM114A1	periocular mesenchyme
591	4.54753e-09	0.555424	0.228	0.153	0.000152515	1	ENSG00000131477	RAMP2	periocular mesenchyme
592	0.000438635	0.555374	0.277	0.249	1	1	ENSG00000183291	SELENOF	periocular mesenchyme
593	1.44001e-11	0.555074	0.185	0.103	4.8295e-07	1	ENSG00000164294	GPX8	periocular mesenchyme
594	2.26469e-08	0.553024	0.19	0.121	0.00075953	1	ENSG00000075420	FNDC3B	periocular mesenchyme
595	1.05431e-05	0.552406	0.148	0.099	0.353594	1	ENSG00000146250	PRSS35	periocular mesenchyme
596	4.78949e-07	0.550272	0.542	0.545	0.016063	1	ENSG00000134308	YWHAQ	periocular mesenchyme
597	0.000103174	0.549359	0.19	0.148	1	1	ENSG00000265808	SEC22B	periocular mesenchyme
598	0.000417261	0.547802	0.354	0.352	1	1	ENSG00000135535	CD164	periocular mesenchyme
599	1.17809e-16	0.546236	0.151	0.062	3.95107e-12	1	ENSG00000008441	NFIX	periocular mesenchyme
600	1.08019e-13	0.545532	0.138	0.061	3.62275e-09	1	ENSG00000135272	MDFIC	periocular mesenchyme
601	0.0031624	0.543012	0.231	0.209	1	1	ENSG00000122218	COPA	periocular mesenchyme
602	0.0093514	0.542847	0.215	0.193	1	1	ENSG00000205213	LGR4	periocular mesenchyme
603	2.53224e-13	0.541777	0.135	0.06	8.49263e-09	1	ENSG00000183098	GPC6	periocular mesenchyme
604	1.20275e-05	0.541489	0.276	0.222	0.403378	1	ENSG00000147862	NFIB	periocular mesenchyme
605	0.000309007	0.541213	0.259	0.223	1	1	ENSG00000122642	FKBP9	periocular mesenchyme
606	2.49968e-08	0.540102	0.182	0.112	0.000838341	1	ENSG00000164434	FABP7	periocular mesenchyme
607	4.0125e-05	0.538058	0.172	0.125	1	1	ENSG00000128791	TWSG1	periocular mesenchyme
608	1.3316e-17	0.536499	0.452	0.302	4.46593e-13	1	ENSG00000163359	COL6A3	periocular mesenchyme
609	1.71156e-05	0.536474	0.236	0.183	0.574023	1	ENSG00000169504	CLIC4	periocular mesenchyme
610	0.000224857	0.536102	0.32	0.295	1	1	ENSG00000049449	RCN1	periocular mesenchyme
611	3.16225e-10	0.531934	0.15	0.078	1.06056e-05	1	ENSG00000176046	NUPR1	periocular mesenchyme
612	1.50512e-10	0.530959	0.121	0.057	5.04788e-06	1	ENSG00000197061	HIST1H4C	periocular mesenchyme
613	5.24051e-05	0.53088	0.182	0.133	1	1	ENSG00000107957	SH3PXD2A	periocular mesenchyme
614	5.51626e-07	0.529537	0.182	0.122	0.0185004	1	ENSG00000110811	P3H3	periocular mesenchyme
615	0.000291137	0.526075	0.181	0.143	1	1	ENSG00000184432	COPB2	periocular mesenchyme
616	7.45833e-06	0.524995	0.159	0.106	0.250137	1	ENSG00000159403	C1R	periocular mesenchyme
617	1.12466e-05	0.522799	0.127	0.08	0.377187	1	ENSG00000172819	RARG	periocular mesenchyme
618	1.70657e-12	0.519893	0.399	0.285	5.7235e-08	1	ENSG00000213190	MLLT11	periocular mesenchyme
619	1.88174e-06	0.519517	0.188	0.131	0.0631099	1	ENSG00000173905	GOLIM4	periocular mesenchyme
620	7.35424e-06	0.519106	0.237	0.184	0.246646	1	ENSG00000196562	SULF2	periocular mesenchyme
621	1.42947e-05	0.518201	0.221	0.167	0.479417	1	ENSG00000186469	GNG2	periocular mesenchyme
622	2.67199e-14	0.517442	0.514	0.394	8.96132e-10	1	ENSG00000142173	COL6A2	periocular mesenchyme
623	0.00145917	0.516706	0.373	0.374	1	1	ENSG00000163584	RPL22L1	periocular mesenchyme
624	4.80308e-17	0.515934	0.147	0.058	1.61086e-12	1	ENSG00000127528	KLF2	periocular mesenchyme
625	6.17967e-07	0.51552	0.207	0.146	0.0207254	1	ENSG00000160932	LY6E	periocular mesenchyme
626	7.93114e-09	0.515199	0.124	0.065	0.000265995	1	ENSG00000183801	OLFML1	periocular mesenchyme
627	2.53091e-07	0.51428	0.124	0.071	0.00848818	1	ENSG00000136859	ANGPTL2	periocular mesenchyme
628	0.000371696	0.512609	0.17	0.131	1	1	ENSG00000164176	EDIL3	periocular mesenchyme
629	2.47011e-14	0.512362	0.693	0.628	8.28426e-10	1	ENSG00000134986	NREP	periocular mesenchyme
630	8.33683e-07	0.512287	0.19	0.13	0.0279601	1	ENSG00000148468	FAM171A1	periocular mesenchyme
631	0.0066346	0.511765	0.268	0.257	1	1	ENSG00000086598	TMED2	periocular mesenchyme
632	0.00173859	0.510617	0.236	0.207	1	1	ENSG00000064666	CNN2	periocular mesenchyme
633	2.84361e-13	0.510511	0.702	0.757	9.5369e-09	1	ENSG00000088986	DYNLL1	periocular mesenchyme
634	2.02927e-07	0.506798	0.17	0.109	0.00680577	1	ENSG00000168487	BMP1	periocular mesenchyme
635	3.78579e-05	0.50449	0.188	0.142	1	1	ENSG00000136205	TNS3	periocular mesenchyme
636	0.000233082	0.503845	0.178	0.137	1	1	ENSG00000141696	P3H4	periocular mesenchyme
637	5.97457e-05	0.503563	0.234	0.186	1	1	ENSG00000189184	PCDH18	periocular mesenchyme
638	0.00712242	0.502805	0.209	0.187	1	1	ENSG00000100934	SEC23A	periocular mesenchyme
639	4.87001e-265	4.42397	0.994	0.61	1.6333e-260	2	ENSG00000206172	HBA1	red blood cells
640	2.02645e-253	4.30396	0.994	0.815	6.79631e-249	2	ENSG00000188536	HBA2	red blood cells
641	1.1252e-263	4.13611	1	0.862	3.77368e-259	2	ENSG00000196565	HBG2	red blood cells
642	6.8234e-264	3.9995	0.97	0.473	2.28843e-259	2	ENSG00000213934	HBG1	red blood cells
643	1.8352e-255	3.62207	0.911	0.345	6.15489e-251	2	ENSG00000244734	HBB	red blood cells
644	1.30033e-191	2.3817	0.469	0.06	4.36104e-187	2	ENSG00000130656	HBZ	red blood cells
645	9.4756e-169	2.37904	0.538	0.107	3.17793e-164	2	ENSG00000147454	SLC25A37	red blood cells
646	1.10898e-182	1.89165	0.385	0.035	3.7193e-178	2	ENSG00000158578	ALAS2	red blood cells
647	6.00504e-150	1.85862	0.365	0.043	2.01397e-145	2	ENSG00000206177	HBM	red blood cells
648	1.30378e-142	1.85149	0.32	0.032	4.37261e-138	2	ENSG00000261857	MIA	red blood cells
649	2.69953e-131	1.76635	0.33	0.04	9.05369e-127	2	ENSG00000169877	AHSP	red blood cells
650	1.03803e-110	1.58724	0.266	0.029	3.48135e-106	2	ENSG00000213931	HBE1	red blood cells
651	2.50267e-13	1.11203	0.32	0.232	8.39345e-09	2	ENSG00000013306	SLC25A39	red blood cells
652	1.37275e-47	1.08958	0.721	0.44	4.60394e-43	2	ENSG00000133110	POSTN	red blood cells
653	6.93961e-43	1.08697	0.233	0.062	2.32741e-38	2	ENSG00000164530	PI16	red blood cells
654	6.29644e-26	1.05553	0.231	0.092	2.1117e-21	2	ENSG00000112699	GMDS	red blood cells
655	4.27783e-87	1.01151	0.186	0.016	1.4347e-82	2	ENSG00000004939	SLC4A1	red blood cells
656	4.90743e-104	0.985294	0.179	0.009	1.64585e-99	2	ENSG00000136929	HEMGN	red blood cells
657	5.81734e-27	0.955279	0.501	0.317	1.95102e-22	2	ENSG00000166147	FBN1	red blood cells
658	8.49035e-26	0.951556	0.441	0.258	2.84749e-21	2	ENSG00000113083	LOX	red blood cells
659	1.54117e-102	0.930682	0.151	0.004	5.16878e-98	2	ENSG00000141469	SLC14A1	red blood cells
660	3.23878e-36	0.908625	0.337	0.137	1.08622e-31	2	ENSG00000136732	GYPC	red blood cells
661	1.91563e-28	0.877449	0.274	0.117	6.42465e-24	2	ENSG00000124098	FAM210B	red blood cells
662	7.20192e-12	0.820059	0.194	0.102	2.41538e-07	2	ENSG00000149591	TAGLN	red blood cells
663	6.3754e-19	0.810977	0.203	0.087	2.13818e-14	2	ENSG00000170345	FOS	red blood cells
664	7.43043e-80	0.79065	0.153	0.01	2.49202e-75	2	ENSG00000284931	AC104389.5	red blood cells
665	0.00666606	0.788789	0.179	0.158	1	2	ENSG00000183508	TENT5C	red blood cells
666	1.44715e-10	0.784708	0.264	0.174	4.85345e-06	2	ENSG00000100345	MYH9	red blood cells
667	3.69918e-11	0.777441	0.169	0.086	1.24063e-06	2	ENSG00000107796	ACTA2	red blood cells
668	1.29699e-18	0.766574	0.33	0.183	4.34985e-14	2	ENSG00000145335	SNCA	red blood cells
669	2.23159e-14	0.752355	0.248	0.135	7.48432e-10	2	ENSG00000101955	SRPX	red blood cells
670	3.69523e-07	0.726032	0.14	0.081	0.0123931	2	ENSG00000112378	PERP	red blood cells
671	1.85976e-08	0.719703	0.324	0.261	0.000623725	2	ENSG00000266412	NCOA4	red blood cells
672	2.48647e-22	0.709045	0.199	0.076	8.33912e-18	2	ENSG00000120738	EGR1	red blood cells
673	1.96937e-14	0.700826	0.196	0.093	6.60488e-10	2	ENSG00000118495	PLAGL1	red blood cells
674	4.79188e-15	0.680044	0.21	0.105	1.6071e-10	2	ENSG00000198876	DCAF12	red blood cells
675	1.42232e-12	0.678397	0.242	0.138	4.77017e-08	2	ENSG00000185551	NR2F2	red blood cells
676	2.56681e-18	0.676798	0.624	0.524	8.60856e-14	2	ENSG00000189129	PLAC9	red blood cells
677	7.39203e-10	0.665683	0.207	0.123	2.47914e-05	2	ENSG00000105974	CAV1	red blood cells
678	6.31561e-10	0.65926	0.238	0.145	2.11813e-05	2	ENSG00000167779	IGFBP6	red blood cells
679	6.37209e-19	0.655567	0.197	0.081	2.13707e-14	2	ENSG00000148053	NTRK2	red blood cells
680	4.45764e-19	0.643095	0.173	0.065	1.495e-14	2	ENSG00000169908	TM4SF1	red blood cells
681	2.81843e-12	0.634572	0.136	0.059	9.45245e-08	2	ENSG00000170421	KRT8	red blood cells
682	6.54773e-07	0.626409	0.173	0.109	0.0219598	2	ENSG00000135269	TES	red blood cells
683	2.93154e-15	0.625416	0.549	0.418	9.83181e-11	2	ENSG00000163191	S100A11	red blood cells
684	6.1119e-50	0.623315	0.101	0.008	2.04981e-45	2	ENSG00000094755	GABRP	red blood cells
685	1.41722e-08	0.619023	0.227	0.145	0.000475306	2	ENSG00000160932	LY6E	red blood cells
686	1.25595e-26	0.610227	0.657	0.439	4.2122e-22	2	ENSG00000111341	MGP	red blood cells
687	8.88283e-18	0.606195	0.164	0.063	2.97912e-13	2	ENSG00000168079	SCARA5	red blood cells
688	2.32201e-06	0.60197	0.223	0.154	0.0778754	2	ENSG00000163520	FBLN2	red blood cells
689	5.56668e-29	0.598415	0.101	0.017	1.86695e-24	2	ENSG00000124107	SLPI	red blood cells
690	2.76647e-13	0.598352	0.514	0.382	9.27819e-09	2	ENSG00000078596	ITM2A	red blood cells
691	2.87859e-11	0.593165	0.121	0.052	9.65423e-07	2	ENSG00000111057	KRT18	red blood cells
692	4.45964e-05	0.586218	0.354	0.312	1	2	ENSG00000148180	GSN	red blood cells
693	1.74971e-08	0.584226	0.207	0.121	0.000586819	2	ENSG00000106483	SFRP4	red blood cells
694	1.10465e-13	0.577994	0.415	0.28	3.70477e-09	2	ENSG00000131016	AKAP12	red blood cells
695	4.97574e-10	0.572953	0.188	0.103	1.66876e-05	2	ENSG00000092758	COL9A3	red blood cells
696	5.32847e-12	0.572032	0.201	0.105	1.78706e-07	2	ENSG00000134531	EMP1	red blood cells
697	4.87491e-06	0.57131	0.218	0.156	0.163495	2	ENSG00000250722	SELENOP	red blood cells
698	9.69764e-30	0.570516	0.125	0.026	3.25239e-25	2	ENSG00000180318	ALX1	red blood cells
699	2.87662e-06	0.569288	0.142	0.085	0.096476	2	ENSG00000176971	FIBIN	red blood cells
700	1.4823e-12	0.568698	0.412	0.291	4.97134e-08	2	ENSG00000141753	IGFBP4	red blood cells
701	9.37877e-18	0.56421	0.123	0.039	3.14545e-13	2	ENSG00000043039	BARX2	red blood cells
702	1.04479e-10	0.558117	0.425	0.317	3.50402e-06	2	ENSG00000038427	VCAN	red blood cells
703	6.9704e-16	0.554611	0.142	0.053	2.33773e-11	2	ENSG00000008394	MGST1	red blood cells
704	2.08084e-12	0.552883	0.281	0.166	6.97873e-08	2	ENSG00000129009	ISLR	red blood cells
705	3.31929e-15	0.552259	0.352	0.211	1.11322e-10	2	ENSG00000107562	CXCL12	red blood cells
706	1.74116e-06	0.550162	0.134	0.077	0.0583951	2	ENSG00000182326	C1S	red blood cells
707	0.00134684	0.547222	0.283	0.25	1	2	ENSG00000135046	ANXA1	red blood cells
708	4.47561e-16	0.542481	0.207	0.091	1.50103e-11	2	ENSG00000197614	MFAP5	red blood cells
709	3.36357e-05	0.530602	0.182	0.127	1	2	ENSG00000173848	NET1	red blood cells
710	1.0489e-06	0.526774	0.125	0.071	0.035178	2	ENSG00000249992	TMEM158	red blood cells
711	1.25335e-42	0.52382	1	0.89	4.2035e-38	2	ENSG00000168542	COL3A1	red blood cells
712	1.52685e-09	0.521297	0.235	0.144	5.12073e-05	2	ENSG00000175899	A2M	red blood cells
713	6.42104e-05	0.520493	0.207	0.151	1	2	ENSG00000118523	CTGF	red blood cells
714	1.4017e-70	0.518689	0.114	0.005	4.70102e-66	2	ENSG00000173868	PHOSPHO1	red blood cells
715	2.44221e-05	0.516471	0.248	0.183	0.819067	2	ENSG00000140092	FBLN5	red blood cells
716	9.41509e-10	0.514863	0.177	0.094	3.15763e-05	2	ENSG00000124749	COL21A1	red blood cells
717	3.10869e-06	0.512903	0.102	0.054	0.104259	2	ENSG00000112562	SMOC2	red blood cells
718	2.52945e-14	0.511873	0.128	0.048	8.48326e-10	2	ENSG00000178726	THBD	red blood cells
719	0.000539259	0.505668	0.231	0.183	1	2	ENSG00000150687	PRSS23	red blood cells
720	1.52085e-38	0.503837	0.115	0.016	5.10062e-34	2	ENSG00000086506	HBQ1	red blood cells
721	3.84774e-131	1.81858	0.877	0.429	1.29046e-126	3	ENSG00000133110	POSTN	periocular mesenchyme
722	3.81968e-146	1.76401	0.978	0.687	1.28105e-141	3	ENSG00000011465	DCN	periocular mesenchyme
723	3.11485e-83	1.55362	0.783	0.43	1.04466e-78	3	ENSG00000111341	MGP	periocular mesenchyme
724	1.87007e-77	1.3786	0.818	0.548	6.27186e-73	3	ENSG00000163430	FSTL1	periocular mesenchyme
725	2.22899e-26	1.25536	0.37	0.184	7.47557e-22	3	ENSG00000113296	THBS4	periocular mesenchyme
726	1.05111e-50	1.23824	0.65	0.37	3.5252e-46	3	ENSG00000078596	ITM2A	periocular mesenchyme
727	5.29652e-28	1.2277	0.482	0.299	1.77635e-23	3	ENSG00000145423	SFRP2	periocular mesenchyme
728	2.139e-58	1.20609	0.276	0.06	7.17378e-54	3	ENSG00000206384	COL6A6	periocular mesenchyme
729	5.38398e-105	1.19522	0.812	0.283	1.80568e-100	3	ENSG00000168530	MYL1	periocular mesenchyme
730	3.48451e-114	1.16524	0.937	0.416	1.16863e-109	3	ENSG00000159251	ACTC1	periocular mesenchyme
731	1.32456e-19	1.16508	0.334	0.184	4.4423e-15	3	ENSG00000118785	SPP1	periocular mesenchyme
732	7.87584e-33	1.14686	0.466	0.253	2.6414e-28	3	ENSG00000075223	SEMA3C	periocular mesenchyme
733	1.80287e-28	1.13814	0.348	0.161	6.04646e-24	3	ENSG00000129009	ISLR	periocular mesenchyme
734	8.99157e-84	1.13155	0.688	0.236	3.01559e-79	3	ENSG00000185847	LINC01405	periocular mesenchyme
735	1.75542e-132	1.12332	0.993	0.965	5.88732e-128	3	ENSG00000198840	MT-ND3	periocular mesenchyme
736	9.07032e-39	1.10824	0.552	0.315	3.042e-34	3	ENSG00000166147	FBN1	periocular mesenchyme
737	8.58813e-31	1.07434	0.395	0.188	2.88029e-26	3	ENSG00000101825	MXRA5	periocular mesenchyme
738	4.65819e-53	1.07198	0.65	0.34	1.56226e-48	3	ENSG00000185559	DLK1	periocular mesenchyme
739	2.34968e-39	1.07149	0.283	0.085	7.88037e-35	3	ENSG00000197614	MFAP5	periocular mesenchyme
740	3.87621e-88	1.06365	0.83	0.351	1.3e-83	3	ENSG00000180209	MYLPF	periocular mesenchyme
741	1.07155e-82	1.05575	0.953	0.894	3.59377e-78	3	ENSG00000198888	MT-ND1	periocular mesenchyme
742	4.44973e-25	1.05387	0.457	0.278	1.49235e-20	3	ENSG00000131016	AKAP12	periocular mesenchyme
743	7.20915e-91	1.04658	0.756	0.259	2.4178e-86	3	ENSG00000143632	ACTA1	periocular mesenchyme
744	5.99956e-108	1.01839	1	0.961	2.01213e-103	3	ENSG00000198899	MT-ATP6	periocular mesenchyme
745	1.5182e-56	1.01767	0.565	0.215	5.09175e-52	3	ENSG00000156885	COX6A2	periocular mesenchyme
746	4.61739e-89	1.01585	0.996	0.893	1.54858e-84	3	ENSG00000168542	COL3A1	periocular mesenchyme
747	6.55129e-21	0.989357	0.379	0.211	2.19717e-16	3	ENSG00000107562	CXCL12	periocular mesenchyme
748	3.25732e-23	0.981895	0.513	0.346	1.09244e-18	3	ENSG00000178695	KCTD12	periocular mesenchyme
749	1.02988e-111	0.975445	0.998	0.965	3.454e-107	3	ENSG00000198804	MT-CO1	periocular mesenchyme
[truncated: 1,047,825+ more rows]

## Sheet: PCW13_14749
ST: 14749; 13 PCW
[truncated: 3,278 more rows]
