# Supplementary material for: Spatiotemporal single cell analyses reveal a transient population of retinal progenitor cells in the ciliary margin of developing human retina
Source: Research Square preprint supplement (doi:10.21203/rs.3.rs-3160527/v1), 2023-07-13
Supplement: Supplementary file 5 [file b08e817aa9cb2af22d6e89a6.xlsx]

## Sheet: Sample Overview
Overview of human fetal developmental samples used for single cell ATAC Seq.118,883 cells were captured using the 10XGenomics Chromium Single Cell ATAC Library and Gel Bead Kit (version 1.1).
Sample	Stage (PCW)	Tissue	Number of Cells before Filtering	Number of Cells after Filtering
15189.1	8.5	Whole Eye	5099	2642
15189.2	8.5	Whole Eye	3908	2186
14601	10	Retina	5502	2617
14680	12	Retina	4764	2771
15761	13	Retina	16314	12507
14713	16	Retina	7150	3984
15232	16	Retina	20000	14470
15221	17	Retina	10306	857
15700	18	Retina	4025	958
14556	20	Retina	2705	1195
15183	20	Retina	19110	5848
15184	21	Retina	20000	10153

## Sheet: PCW8_15189.1
15189.1; 8.5 PCW; Full Eye
	p_val	avg_log2FC	pct.1	pct.2	p_val_adj	cluster	gene	cell fate
GAS7	1.81e-95	1.13806	0.929	0.554	3.55e-91	0	GAS7	corneal stroma
SCFD2	9.38e-87	1.08188	0.909	0.582	1.84e-82	0	SCFD2	corneal stroma
TMEM132C	3.29e-76	1.05029	0.889	0.504	6.45e-72	0	TMEM132C	corneal stroma
OVOS2	9.86e-81	1.04245	0.575	0.178	1.93e-76	0	OVOS2	corneal stroma
TWIST2	4.96e-79	1.0216	0.725	0.312	9.72e-75	0	TWIST2	corneal stroma
SAMD4A	8.42e-70	1.01996	0.897	0.563	1.65e-65	0	SAMD4A	corneal stroma
DCLK1	8.18e-71	1.00344	0.865	0.515	1.6e-66	0	DCLK1	corneal stroma
TGFBR3	1.51e-82	0.984959	0.931	0.543	2.96e-78	0	TGFBR3	corneal stroma
LOXL2	4.35e-75	0.971114	0.882	0.537	8.52e-71	0	LOXL2	corneal stroma
PALM2	2.78e-65	0.959945	0.828	0.477	5.45e-61	0	PALM2	corneal stroma
CLDN11	5.48e-57	0.917926	0.796	0.504	1.07e-52	0	CLDN11	corneal stroma
CUBN	3.26e-59	0.897021	0.889	0.583	6.4e-55	0	CUBN	corneal stroma
MRPS22	3.29e-64	0.89628	0.826	0.494	6.46e-60	0	MRPS22	corneal stroma
PDGFRA	2.73e-55	0.895195	0.752	0.39	5.36e-51	0	PDGFRA	corneal stroma
LAMA4	8.43e-65	0.893963	0.796	0.398	1.65e-60	0	LAMA4	corneal stroma
COL4A2	6.38e-58	0.885623	0.877	0.552	1.25e-53	0	COL4A2	corneal stroma
COL24A1	2.11e-59	0.874483	0.717	0.369	4.14e-55	0	COL24A1	corneal stroma
ADAM12	5.72e-57	0.874364	0.843	0.52	1.12e-52	0	ADAM12	corneal stroma
CCBE1	1.75e-52	0.873242	0.764	0.438	3.43e-48	0	CCBE1	corneal stroma
WWTR1	1.15e-63	0.854828	0.902	0.557	2.25e-59	0	WWTR1	corneal stroma
LMNA	7.9e-64	0.832756	0.961	0.766	1.55e-59	0	LMNA	corneal stroma
ADAMTS9	6.63e-55	0.821174	0.803	0.469	1.3e-50	0	ADAMTS9	corneal stroma
THADA	9.37e-54	0.815228	0.87	0.647	1.84e-49	0	THADA	corneal stroma
CORIN	5.71e-31	0.813625	0.592	0.328	1.12e-26	0	CORIN	corneal stroma
PALM2-AKAP2	2.41e-46	0.812622	0.86	0.578	4.73e-42	0	PALM2-AKAP2	corneal stroma
MFAP4	1.05e-56	0.811309	0.671	0.301	2.06e-52	0	MFAP4	corneal stroma
COL27A1	8.36e-54	0.802399	0.899	0.572	1.64e-49	0	COL27A1	corneal stroma
COL12A1	1.8e-47	0.798839	0.71	0.387	3.54e-43	0	COL12A1	corneal stroma
RPGRIP1L	2.96e-46	0.795558	0.769	0.517	5.8e-42	0	RPGRIP1L	corneal stroma
PAPPA	8.96e-51	0.793575	0.791	0.453	1.76e-46	0	PAPPA	corneal stroma
ROR1	2.47e-48	0.793441	0.889	0.591	4.85e-44	0	ROR1	corneal stroma
VGLL4	5.63e-57	0.790242	0.897	0.6	1.1e-52	0	VGLL4	corneal stroma
PRRX2	3.4e-50	0.790003	0.681	0.343	6.68e-46	0	PRRX2	corneal stroma
DPYSL3	1.58e-47	0.78658	0.764	0.446	3.11e-43	0	DPYSL3	corneal stroma
SLC1A7	4.4e-58	0.785836	0.656	0.286	8.63e-54	0	SLC1A7	corneal stroma
COL21A1	8.21e-49	0.784261	0.757	0.437	1.61e-44	0	COL21A1	corneal stroma
FILIP1L	7.71e-54	0.778782	0.862	0.583	1.51e-49	0	FILIP1L	corneal stroma
ROR2	9.66e-57	0.778251	0.892	0.66	1.89e-52	0	ROR2	corneal stroma
GLIS1	3.09e-52	0.773081	0.882	0.574	6.06e-48	0	GLIS1	corneal stroma
DOK5	1.86e-57	0.770645	0.649	0.283	3.65e-53	0	DOK5	corneal stroma
CMSS1	6.43e-54	0.769532	0.899	0.662	1.26e-49	0	CMSS1	corneal stroma
LNX1	2.14e-45	0.762928	0.683	0.377	4.19e-41	0	LNX1	corneal stroma
SEMA4A	3.63e-28	0.761304	0.624	0.401	7.11e-24	0	SEMA4A	corneal stroma
NFIB	7.02e-52	0.760371	0.961	0.658	1.38e-47	0	NFIB	corneal stroma
MKX	2.72e-55	0.759447	0.614	0.264	5.34e-51	0	MKX	corneal stroma
KCNJ15	6.18e-63	0.759363	0.57	0.202	1.21e-58	0	KCNJ15	corneal stroma
SMG6	1.79e-56	0.758712	0.946	0.77	3.51e-52	0	SMG6	corneal stroma
XYLT1	4.54e-47	0.757803	0.823	0.498	8.9e-43	0	XYLT1	corneal stroma
CACNA1G	2.41e-49	0.753792	0.857	0.57	4.73e-45	0	CACNA1G	corneal stroma
FBXL7	1.31e-49	0.752667	0.857	0.542	2.56e-45	0	FBXL7	corneal stroma
UST	1.47e-50	0.745529	0.826	0.526	2.88e-46	0	UST	corneal stroma
MAML2	3.49e-50	0.745143	0.904	0.629	6.83e-46	0	MAML2	corneal stroma
LHFPL2	2.07e-47	0.743794	0.892	0.604	4.07e-43	0	LHFPL2	corneal stroma
COL23A1	2.05e-50	0.732288	0.926	0.68	4.01e-46	0	COL23A1	corneal stroma
POU3F3	2.66e-77	0.731202	0.558	0.162	5.21e-73	0	POU3F3	corneal stroma
GLI2	4.97e-48	0.727859	0.936	0.639	9.74e-44	0	GLI2	corneal stroma
DDR2	1.22e-42	0.727175	0.681	0.378	2.39e-38	0	DDR2	corneal stroma
NFATC1	5.77e-49	0.724816	0.919	0.604	1.13e-44	0	NFATC1	corneal stroma
2009-09-01	5.94e-49	0.723699	0.946	0.715	1.16e-44	0	2009-09-01	corneal stroma
RARB	8.03e-44	0.719973	0.857	0.554	1.57e-39	0	RARB	corneal stroma
PRICKLE2	8.95e-45	0.719631	0.88	0.566	1.75e-40	0	PRICKLE2	corneal stroma
BASP1	6.96e-44	0.719129	0.826	0.53	1.36e-39	0	BASP1	corneal stroma
COL4A1	6.08e-48	0.718014	0.752	0.419	1.19e-43	0	COL4A1	corneal stroma
TMEM108	2.1e-48	0.717588	0.735	0.421	4.12e-44	0	TMEM108	corneal stroma
FMNL2	9.53e-56	0.709789	0.914	0.638	1.87e-51	0	FMNL2	corneal stroma
NTN1	5.9e-46	0.708439	0.794	0.505	1.16e-41	0	NTN1	corneal stroma
PARVA	3.23e-29	0.707312	0.695	0.444	6.34e-25	0	PARVA	corneal stroma
RIN2	6.13e-40	0.706753	0.7	0.396	1.2e-35	0	RIN2	corneal stroma
PAPPA2	1.93e-36	0.706594	0.607	0.328	3.78e-32	0	PAPPA2	corneal stroma
ARID5B	2.66e-35	0.705242	0.813	0.521	5.22e-31	0	ARID5B	corneal stroma
AFAP1	6.84e-40	0.699214	0.862	0.586	1.34e-35	0	AFAP1	corneal stroma
MCPH1	1.75e-38	0.697805	0.747	0.51	3.44e-34	0	MCPH1	corneal stroma
CERS6	9.08e-39	0.696305	0.794	0.522	1.78e-34	0	CERS6	corneal stroma
GPC3	2.95e-40	0.692791	0.74	0.426	5.79e-36	0	GPC3	corneal stroma
PALLD	4.59e-45	0.69157	0.931	0.655	9e-41	0	PALLD	corneal stroma
ATXN1	3.78e-37	0.691504	0.88	0.651	7.4e-33	0	ATXN1	corneal stroma
LRRC49	3.54e-32	0.689613	0.622	0.355	6.94e-28	0	LRRC49	corneal stroma
TPRG1	3.51e-35	0.687599	0.7	0.416	6.88e-31	0	TPRG1	corneal stroma
ARHGAP10	1.17e-40	0.684622	0.808	0.518	2.3e-36	0	ARHGAP10	corneal stroma
TWIST1	7.07e-43	0.681927	0.678	0.345	1.39e-38	0	TWIST1	corneal stroma
BRE	3.35e-35	0.6809	0.791	0.621	6.58e-31	0	BRE	corneal stroma
STARD13	4.58e-43	0.677651	0.784	0.462	8.99e-39	0	STARD13	corneal stroma
BICC1	3.29e-37	0.676034	0.794	0.51	6.46e-33	0	BICC1	corneal stroma
PAX3	4.44e-47	0.675286	0.506	0.198	8.7e-43	0	PAX3	corneal stroma
SMARCA2	1.74e-42	0.674511	0.865	0.61	3.41e-38	0	SMARCA2	corneal stroma
FRAS1	1.27e-43	0.67429	0.818	0.524	2.49e-39	0	FRAS1	corneal stroma
PDZRN3	2.49e-43	0.673314	0.838	0.532	4.89e-39	0	PDZRN3	corneal stroma
TNS3	9.95e-44	0.672944	0.926	0.636	1.95e-39	0	TNS3	corneal stroma
APBB2	3.01e-45	0.663729	0.867	0.591	5.9e-41	0	APBB2	corneal stroma
FNBP1	6.01e-36	0.6634	0.708	0.467	1.18e-31	0	FNBP1	corneal stroma
RFTN1	1.5e-36	0.663309	0.671	0.396	2.94e-32	0	RFTN1	corneal stroma
MN1	2.54e-38	0.660762	0.742	0.434	4.98e-34	0	MN1	corneal stroma
PRDM6	1.2e-38	0.66071	0.624	0.316	2.35e-34	0	PRDM6	corneal stroma
TRPS1	1.14e-25	0.66022	0.695	0.45	2.24e-21	0	TRPS1	corneal stroma
WIPF1	4.14e-41	0.659793	0.673	0.37	8.12e-37	0	WIPF1	corneal stroma
COL14A1	3.61e-37	0.658161	0.752	0.459	7.07e-33	0	COL14A1	corneal stroma
NRP1	7.65e-34	0.65438	0.73	0.454	1.5e-29	0	NRP1	corneal stroma
SASH1	1.42e-33	0.643602	0.833	0.557	2.78e-29	0	SASH1	corneal stroma
MOB3B	1.02e-39	0.641676	0.762	0.464	2.01e-35	0	MOB3B	corneal stroma
KCNJ6	2.88e-32	0.640997	0.595	0.333	5.64e-28	0	KCNJ6	corneal stroma
BACH2	1.12e-41	0.640793	0.921	0.649	2.2e-37	0	BACH2	corneal stroma
S1PR2	1.2e-37	0.636069	0.595	0.299	2.35e-33	0	S1PR2	corneal stroma
JAZF1	1.36e-29	0.635707	0.789	0.565	2.67e-25	0	JAZF1	corneal stroma
STK32B	1.39e-23	0.634926	0.563	0.36	2.73e-19	0	STK32B	corneal stroma
GLI3	3.78e-41	0.633212	0.902	0.617	7.42e-37	0	GLI3	corneal stroma
GNA14	3.09e-42	0.632066	0.661	0.338	6.07e-38	0	GNA14	corneal stroma
BCL11B	8.04e-35	0.631799	0.73	0.433	1.58e-30	0	BCL11B	corneal stroma
CHST15	3.16e-36	0.631625	0.602	0.307	6.2e-32	0	CHST15	corneal stroma
TCF7L1	4.49e-36	0.628221	0.875	0.599	8.81e-32	0	TCF7L1	corneal stroma
LDB2	3.43e-33	0.627042	0.789	0.51	6.72e-29	0	LDB2	corneal stroma
DCHS2	1.45e-37	0.62384	0.649	0.345	2.84e-33	0	DCHS2	corneal stroma
ADAMTS19	1.01e-33	0.622884	0.668	0.396	1.98e-29	0	ADAMTS19	corneal stroma
BCL2	3.31e-37	0.619819	0.796	0.514	6.49e-33	0	BCL2	corneal stroma
STX8	3.52e-38	0.61927	0.727	0.422	6.9e-34	0	STX8	corneal stroma
SETBP1	8.94e-34	0.6136	0.882	0.638	1.75e-29	0	SETBP1	corneal stroma
GAREM1	6.89e-36	0.613336	0.838	0.588	1.35e-31	0	GAREM1	corneal stroma
STAMBPL1	4.1e-34	0.6081	0.602	0.322	8.04e-30	0	STAMBPL1	corneal stroma
PIGC	5.28e-37	0.604908	0.59	0.3	1.04e-32	0	PIGC	corneal stroma
CD9	9.59e-33	0.602225	0.531	0.267	1.88e-28	0	CD9	corneal stroma
NXN	5.34e-34	0.601986	0.853	0.689	1.05e-29	0	NXN	corneal stroma
MYO1E	2.73e-32	0.601028	0.713	0.446	5.36e-28	0	MYO1E	corneal stroma
SDC2	7.19e-33	0.601016	0.72	0.435	1.41e-28	0	SDC2	corneal stroma
DOCK10	2.9e-32	0.60029	0.668	0.411	5.69e-28	0	DOCK10	corneal stroma
PRRX1	9.36e-40	0.598984	0.678	0.352	1.84e-35	0	PRRX1	corneal stroma
ITGA9	1.73e-37	0.598623	0.865	0.6	3.38e-33	0	ITGA9	corneal stroma
PID1	1.8e-34	0.59231	0.705	0.448	3.53e-30	0	PID1	corneal stroma
PDE3A	4.17e-33	0.59035	0.764	0.489	8.17e-29	0	PDE3A	corneal stroma
THRB	4.27e-27	0.587857	0.673	0.432	8.38e-23	0	THRB	corneal stroma
SPON1	8.18e-19	0.587817	0.619	0.396	1.6e-14	0	SPON1	corneal stroma
CLEC2L	4.79e-49	0.587566	0.423	0.134	9.39e-45	0	CLEC2L	corneal stroma
CLEC16A	1.29e-34	0.587543	0.862	0.722	2.52e-30	0	CLEC16A	corneal stroma
FBLN1	3.27e-31	0.582563	0.688	0.412	6.42e-27	0	FBLN1	corneal stroma
TRIM2	2.15e-29	0.581352	0.759	0.507	4.22e-25	0	TRIM2	corneal stroma
PDGFD	8.52e-35	0.581279	0.609	0.329	1.67e-30	0	PDGFD	corneal stroma
ARHGAP28	5.45e-31	0.58075	0.828	0.578	1.07e-26	0	ARHGAP28	corneal stroma
HMCN1	1.21e-30	0.580726	0.695	0.428	2.37e-26	0	HMCN1	corneal stroma
TNNT3	3.67e-47	0.580109	0.467	0.166	7.2e-43	0	TNNT3	corneal stroma
ANTXR1	1.51e-31	0.577632	0.774	0.511	2.95e-27	0	ANTXR1	corneal stroma
SIPA1L1	2.46e-27	0.573637	0.835	0.621	4.82e-23	0	SIPA1L1	corneal stroma
NGF	8.83e-35	0.572989	0.499	0.226	1.73e-30	0	NGF	corneal stroma
NELL2	8.1e-33	0.571482	0.759	0.466	1.59e-28	0	NELL2	corneal stroma
MYO3B	8.93e-26	0.570767	0.713	0.455	1.75e-21	0	MYO3B	corneal stroma
SLC1A3	3.43e-29	0.570409	0.504	0.257	6.73e-25	0	SLC1A3	corneal stroma
ATG7	2.63e-28	0.569196	0.781	0.566	5.15e-24	0	ATG7	corneal stroma
BMPER	8.26e-31	0.569175	0.658	0.393	1.62e-26	0	BMPER	corneal stroma
SYNPO2	5.38e-28	0.568279	0.698	0.434	1.06e-23	0	SYNPO2	corneal stroma
CENPP	2.32e-26	0.568159	0.791	0.594	4.55e-22	0	CENPP	corneal stroma
FREM1	2.28e-33	0.567998	0.545	0.272	4.47e-29	0	FREM1	corneal stroma
RALGPS1	1.71e-35	0.567887	0.912	0.752	3.35e-31	0	RALGPS1	corneal stroma
RUNX1T1	8.74e-26	0.565216	0.833	0.682	1.71e-21	0	RUNX1T1	corneal stroma
TCEA3	1.55e-34	0.565064	0.538	0.271	3.04e-30	0	TCEA3	corneal stroma
C1QTNF7	1.74e-28	0.564715	0.575	0.318	3.42e-24	0	C1QTNF7	corneal stroma
TCF7L2	2.08e-31	0.562197	0.848	0.634	4.07e-27	0	TCF7L2	corneal stroma
IL31RA	6.99e-48	0.562155	0.447	0.151	1.37e-43	0	IL31RA	corneal stroma
PLA2G4A	8.67e-44	0.561538	0.651	0.318	1.7e-39	0	PLA2G4A	corneal stroma
RNF216	3.56e-26	0.561345	0.818	0.65	6.99e-22	0	RNF216	corneal stroma
VGLL3	4.66e-29	0.560471	0.582	0.315	9.13e-25	0	VGLL3	corneal stroma
FBLN5	1.09e-26	0.559919	0.56	0.308	2.14e-22	0	FBLN5	corneal stroma
SLC12A8	1.76e-25	0.559911	0.629	0.387	3.45e-21	0	SLC12A8	corneal stroma
COL26A1	1.94e-31	0.559459	0.693	0.426	3.8e-27	0	COL26A1	corneal stroma
TMTC2	1.9e-28	0.55895	0.811	0.574	3.72e-24	0	TMTC2	corneal stroma
SEC24D	3.2e-32	0.557975	0.705	0.426	6.27e-28	0	SEC24D	corneal stroma
DNER	9.78e-28	0.557215	0.695	0.445	1.92e-23	0	DNER	corneal stroma
ENPP2	1.15e-34	0.554608	0.563	0.271	2.25e-30	0	ENPP2	corneal stroma
CPVL	2.48e-24	0.55328	0.587	0.351	4.87e-20	0	CPVL	corneal stroma
SLC39A11	1.14e-22	0.553177	0.683	0.474	2.23e-18	0	SLC39A11	corneal stroma
ZNF704	4.33e-27	0.551459	0.754	0.501	8.5e-23	0	ZNF704	corneal stroma
COL5A1	7e-33	0.550323	0.875	0.588	1.37e-28	0	COL5A1	corneal stroma
TRAF3IP2	1.06e-27	0.549331	0.612	0.374	2.07e-23	0	TRAF3IP2	corneal stroma
CAV2	9.02e-29	0.549185	0.587	0.334	1.77e-24	0	CAV2	corneal stroma
ARHGEF28	1.25e-33	0.548634	0.575	0.302	2.46e-29	0	ARHGEF28	corneal stroma
ALX4	7.51e-37	0.547087	0.641	0.336	1.47e-32	0	ALX4	corneal stroma
COL5A2	6.05e-34	0.544302	0.614	0.32	1.19e-29	0	COL5A2	corneal stroma
FBN1	3.61e-30	0.543719	0.754	0.472	7.07e-26	0	FBN1	corneal stroma
TGFBR2	3.04e-30	0.542316	0.595	0.321	5.96e-26	0	TGFBR2	corneal stroma
DCLK2	2.71e-32	0.542178	0.73	0.447	5.32e-28	0	DCLK2	corneal stroma
YLPM1	4.66e-26	0.541216	0.673	0.46	9.14e-22	0	YLPM1	corneal stroma
FNDC3B	2.78e-29	0.541074	0.872	0.655	5.44e-25	0	FNDC3B	corneal stroma
NR4A1	7.49e-29	0.541045	0.885	0.685	1.47e-24	0	NR4A1	corneal stroma
MLH3	4.42e-35	0.539915	0.521	0.252	8.67e-31	0	MLH3	corneal stroma
OLFML3	3.63e-31	0.539787	0.548	0.282	7.12e-27	0	OLFML3	corneal stroma
SCARA5	6.1e-30	0.539628	0.602	0.336	1.2e-25	0	SCARA5	corneal stroma
WNT5A	4.77e-30	0.538012	0.568	0.305	9.36e-26	0	WNT5A	corneal stroma
FHAD1	2.09e-26	0.537635	0.609	0.367	4.09e-22	0	FHAD1	corneal stroma
CTC-441N14.4	8.23e-36	0.53709	0.486	0.214	1.61e-31	0	CTC-441N14.4	corneal stroma
ADCY2	6.83e-27	0.537049	0.639	0.393	1.34e-22	0	ADCY2	corneal stroma
BOC	7.91e-28	0.536917	0.725	0.455	1.55e-23	0	BOC	corneal stroma
RAPGEF4	8.7e-33	0.535484	0.671	0.391	1.71e-28	0	RAPGEF4	corneal stroma
CTD-3088G3.8	6.15e-33	0.534601	0.619	0.335	1.21e-28	0	CTD-3088G3.8	corneal stroma
PLD1	1.19e-27	0.5337	0.7	0.459	2.33e-23	0	PLD1	corneal stroma
RUNX2	5.24e-23	0.533029	0.786	0.613	1.03e-18	0	RUNX2	corneal stroma
VPS13D	2.11e-24	0.532938	0.801	0.628	4.14e-20	0	VPS13D	corneal stroma
NFATC4	6.01e-28	0.532657	0.767	0.496	1.18e-23	0	NFATC4	corneal stroma
SMOC2	4.94e-34	0.532153	0.658	0.379	9.69e-30	0	SMOC2	corneal stroma
TNS1	4.32e-30	0.531187	0.909	0.706	8.46e-26	0	TNS1	corneal stroma
TCF4	1.1e-28	0.530517	0.912	0.782	2.16e-24	0	TCF4	corneal stroma
TRABD2B	9.22e-21	0.529793	0.705	0.474	1.81e-16	0	TRABD2B	corneal stroma
TSHZ1	2.05e-29	0.529154	0.629	0.36	4.02e-25	0	TSHZ1	corneal stroma
MYOF	1.84e-31	0.529138	0.762	0.48	3.6e-27	0	MYOF	corneal stroma
ANTXR2	1.24e-26	0.529047	0.538	0.302	2.42e-22	0	ANTXR2	corneal stroma
AL078584.1	4.41e-26	0.528347	0.641	0.394	8.65e-22	0	AL078584.1	corneal stroma
SLC16A7	3.58e-27	0.527601	0.634	0.379	7.01e-23	0	SLC16A7	corneal stroma
DAAM2	1.65e-32	0.527274	0.565	0.288	3.24e-28	0	DAAM2	corneal stroma
TG	5.67e-26	0.526968	0.72	0.484	1.11e-21	0	TG	corneal stroma
ADPRHL1	1.67e-30	0.526574	0.501	0.245	3.27e-26	0	ADPRHL1	corneal stroma
DIRC3	1.39e-28	0.52452	0.843	0.589	2.72e-24	0	DIRC3	corneal stroma
RP11-307N16.6	1.27e-25	0.523082	0.767	0.567	2.49e-21	0	RP11-307N16.6	corneal stroma
FGFR2	1.95e-31	0.522764	0.717	0.422	3.83e-27	0	FGFR2	corneal stroma
NUAK1	1.37e-21	0.521512	0.634	0.407	2.69e-17	0	NUAK1	corneal stroma
LTBP1	6.25e-26	0.520907	0.843	0.649	1.23e-21	0	LTBP1	corneal stroma
CTD-2535L24.2	4.46e-22	0.520014	0.7	0.486	8.74e-18	0	CTD-2535L24.2	corneal stroma
SHROOM3	1.02e-27	0.520009	0.803	0.553	2e-23	0	SHROOM3	corneal stroma
ARHGEF40	8.86e-25	0.519098	0.688	0.456	1.74e-20	0	ARHGEF40	corneal stroma
COL16A1	1.97e-28	0.51891	0.629	0.373	3.87e-24	0	COL16A1	corneal stroma
MTHFD1L	3.08e-24	0.51854	0.801	0.602	6.03e-20	0	MTHFD1L	corneal stroma
ARHGAP18	2.93e-21	0.517543	0.582	0.37	5.74e-17	0	ARHGAP18	corneal stroma
EXT1	7.17e-32	0.517019	0.865	0.642	1.41e-27	0	EXT1	corneal stroma
COL1A1	2.96e-27	0.515617	0.703	0.443	5.8e-23	0	COL1A1	corneal stroma
KIF25	9.67e-32	0.514725	0.408	0.168	1.9e-27	0	KIF25	corneal stroma
FOXL2NB	7.5e-34	0.514061	0.479	0.207	1.47e-29	0	FOXL2NB	corneal stroma
SLC14A2	3.7e-24	0.513915	0.749	0.525	7.25e-20	0	SLC14A2	corneal stroma
TNXB	4.43e-27	0.513788	0.661	0.412	8.68e-23	0	TNXB	corneal stroma
VAC14	1.61e-26	0.51357	0.789	0.593	3.15e-22	0	VAC14	corneal stroma
PLCE1	2.05e-21	0.511498	0.595	0.374	4.03e-17	0	PLCE1	corneal stroma
TBX15	4.07e-28	0.511114	0.592	0.317	7.99e-24	0	TBX15	corneal stroma
PDZD2	9.93e-32	0.509886	0.848	0.583	1.95e-27	0	PDZD2	corneal stroma
FTCDNL1	1.62e-28	0.509379	0.45	0.212	3.18e-24	0	FTCDNL1	corneal stroma
SORBS3	2.32e-20	0.509038	0.595	0.383	4.54e-16	0	SORBS3	corneal stroma
EMP1	7.67e-28	0.507396	0.398	0.174	1.5e-23	0	EMP1	corneal stroma
AXL	1.79e-25	0.50726	0.528	0.283	3.52e-21	0	AXL	corneal stroma
EFNA5	1.96e-25	0.506817	0.875	0.622	3.85e-21	0	EFNA5	corneal stroma
SPATA13	7.06e-25	0.505279	0.762	0.563	1.38e-20	0	SPATA13	corneal stroma
TEAD1	8.61e-24	0.504665	0.894	0.717	1.69e-19	0	TEAD1	corneal stroma
RAB8B	1.77e-06	0.504632	0.686	0.601	0.0346548	0	RAB8B	corneal stroma
AC013461.1	4.27e-16	0.503838	0.518	0.329	8.38e-12	0	AC013461.1	corneal stroma
STXBP6	2.96e-23	0.503169	0.58	0.345	5.8e-19	0	STXBP6	corneal stroma
FOXL2	1.07e-31	0.501401	0.442	0.187	2.1e-27	0	FOXL2	corneal stroma
TRPM8	1e-29	0.501161	0.452	0.205	1.96e-25	0	TRPM8	corneal stroma
PCSK5	1.34e-27	0.499976	0.799	0.549	2.64e-23	0	PCSK5	corneal stroma
TIAM2	2.71e-24	0.499698	0.796	0.609	5.32e-20	0	TIAM2	corneal stroma
SH3PXD2B	1.01e-29	0.499656	0.811	0.526	1.98e-25	0	SH3PXD2B	corneal stroma
DYSF	1.66e-20	0.499547	0.663	0.452	3.25e-16	0	DYSF	corneal stroma
LAMB4	3.91e-25	0.499301	0.504	0.268	7.66e-21	0	LAMB4	corneal stroma
ADGRA2	3.31e-27	0.498132	0.776	0.526	6.49e-23	0	ADGRA2	corneal stroma
ADAMTS2	6.75e-20	0.497916	0.74	0.556	1.32e-15	0	ADAMTS2	corneal stroma
GRK5	3.35e-26	0.496781	0.88	0.773	6.57e-22	0	GRK5	corneal stroma
DNMT1	9.1e-19	0.496112	0.686	0.513	1.78e-14	0	DNMT1	corneal stroma
EFCAB6	6.71e-19	0.495898	0.575	0.384	1.32e-14	0	EFCAB6	corneal stroma
SH3RF1	4.46e-28	0.495624	0.725	0.469	8.75e-24	0	SH3RF1	corneal stroma
CDRT4	6.46e-24	0.492409	0.553	0.306	1.27e-19	0	CDRT4	corneal stroma
CHODL	1.33e-25	0.491803	0.585	0.349	2.61e-21	0	CHODL	corneal stroma
RCVRN	1.32e-48	0.49137	0.349	0.091	2.58e-44	0	RCVRN	corneal stroma
ADAMTSL3	1.67e-30	0.490894	0.622	0.343	3.28e-26	0	ADAMTSL3	corneal stroma
SAMD12	7.07e-20	0.490333	0.646	0.433	1.39e-15	0	SAMD12	corneal stroma
C8orf34	3.08e-27	0.490309	0.683	0.434	6.05e-23	0	C8orf34	corneal stroma
ATF6	3.49e-20	0.490161	0.639	0.426	6.85e-16	0	ATF6	corneal stroma
SVIL	3.62e-27	0.489569	0.821	0.569	7.09e-23	0	SVIL	corneal stroma
VMP1	1.19e-18	0.488704	0.717	0.573	2.34e-14	0	VMP1	corneal stroma
ACTN1	4.74e-23	0.488559	0.678	0.446	9.29e-19	0	ACTN1	corneal stroma
EHD2	2.57e-27	0.488351	0.541	0.293	5.03e-23	0	EHD2	corneal stroma
COL6A2	4.94e-34	0.487656	0.482	0.21	9.68e-30	0	COL6A2	corneal stroma
TRIO	6.39e-29	0.486016	0.951	0.79	1.25e-24	0	TRIO	corneal stroma
CRTC3	3.98e-22	0.485962	0.602	0.384	7.81e-18	0	CRTC3	corneal stroma
ERG	5.24e-28	0.485478	0.644	0.37	1.03e-23	0	ERG	corneal stroma
TTC39C	2.31e-19	0.485317	0.536	0.326	4.52e-15	0	TTC39C	corneal stroma
RP11-506B6.7	2.52e-30	0.485094	0.673	0.38	4.93e-26	0	RP11-506B6.7	corneal stroma
SLIT2	1.17e-15	0.484329	0.722	0.521	2.29e-11	0	SLIT2	corneal stroma
KIF13A	3e-20	0.483969	0.641	0.436	5.88e-16	0	KIF13A	corneal stroma
RBMS1	6.46e-22	0.483444	0.794	0.628	1.27e-17	0	RBMS1	corneal stroma
SGCG	1.83e-32	0.483059	0.42	0.175	3.58e-28	0	SGCG	corneal stroma
ATP8B4	5.69e-23	0.4811	0.582	0.352	1.12e-18	0	ATP8B4	corneal stroma
COL1A2	4.06e-28	0.479928	0.631	0.335	7.95e-24	0	COL1A2	corneal stroma
KCNA1	1.04e-29	0.479913	0.342	0.128	2.04e-25	0	KCNA1	corneal stroma
SMAD6	5.48e-23	0.479231	0.826	0.677	1.07e-18	0	SMAD6	corneal stroma
LUM	4.09e-50	0.478961	0.346	0.084	8.02e-46	0	LUM	corneal stroma
L3MBTL4	3.66e-22	0.478898	0.617	0.392	7.17e-18	0	L3MBTL4	corneal stroma
TVP23C-CDRT4	4.86e-19	0.476773	0.607	0.412	9.53e-15	0	TVP23C-CDRT4	corneal stroma
AKAP13	1.16e-26	0.476449	0.87	0.713	2.27e-22	0	AKAP13	corneal stroma
MED12L	1.34e-24	0.475297	0.74	0.501	2.63e-20	0	MED12L	corneal stroma
PRR16	3.28e-22	0.474385	0.499	0.284	6.44e-18	0	PRR16	corneal stroma
MRGPRF	2.67e-29	0.474307	0.442	0.201	5.24e-25	0	MRGPRF	corneal stroma
DISC1	6.75e-26	0.474113	0.799	0.544	1.32e-21	0	DISC1	corneal stroma
C8orf86	1.96e-36	0.473936	0.418	0.156	3.85e-32	0	C8orf86	corneal stroma
PTK7	1.2e-25	0.472278	0.727	0.494	2.36e-21	0	PTK7	corneal stroma
FMN2	1.13e-22	0.472094	0.686	0.463	2.22e-18	0	FMN2	corneal stroma
VWA8	7.68e-22	0.47183	0.683	0.485	1.51e-17	0	VWA8	corneal stroma
GBP5	1.39e-54	0.471197	0.28	0.05	2.72e-50	0	GBP5	corneal stroma
ENPEP	7.21e-32	0.470393	0.575	0.295	1.41e-27	0	ENPEP	corneal stroma
CALD1	8.28e-22	0.469953	0.663	0.448	1.62e-17	0	CALD1	corneal stroma
SPRED1	3.02e-23	0.469625	0.639	0.402	5.93e-19	0	SPRED1	corneal stroma
MDFI	1.37e-22	0.469568	0.462	0.246	2.68e-18	0	MDFI	corneal stroma
C11orf96	6.07e-25	0.4691	0.516	0.279	1.19e-20	0	C11orf96	corneal stroma
RUNX3	1.69e-23	0.467616	0.393	0.189	3.31e-19	0	RUNX3	corneal stroma
CCDC7	7.8e-34	0.467144	0.457	0.195	1.53e-29	0	CCDC7	corneal stroma
VEPH1	3.29e-23	0.465244	0.624	0.395	6.44e-19	0	VEPH1	corneal stroma
VWC2L	4.27e-16	0.464012	0.364	0.188	8.37e-12	0	VWC2L	corneal stroma
LAMA3	2.14e-17	0.462953	0.56	0.367	4.2e-13	0	LAMA3	corneal stroma
PREX1	7.37e-26	0.462853	0.767	0.505	1.45e-21	0	PREX1	corneal stroma
BNC2	6.75e-22	0.462108	0.808	0.591	1.32e-17	0	BNC2	corneal stroma
MID1	8.91e-28	0.462045	0.74	0.469	1.75e-23	0	MID1	corneal stroma
PRICKLE1	5.88e-24	0.461502	0.656	0.407	1.15e-19	0	PRICKLE1	corneal stroma
MMP14	6.35e-29	0.460579	0.565	0.298	1.25e-24	0	MMP14	corneal stroma
ZADH2	1.67e-20	0.460552	0.496	0.284	3.28e-16	0	ZADH2	corneal stroma
BMP7	1.11e-21	0.45973	0.602	0.366	2.17e-17	0	BMP7	corneal stroma
HDAC7	3.77e-18	0.459602	0.686	0.492	7.38e-14	0	HDAC7	corneal stroma
ST5	7.35e-24	0.459229	0.862	0.657	1.44e-19	0	ST5	corneal stroma
IGFBP6	4.65e-28	0.456191	0.442	0.206	9.11e-24	0	IGFBP6	corneal stroma
EPHA4	5.33e-21	0.456171	0.686	0.461	1.05e-16	0	EPHA4	corneal stroma
CLMP	2.78e-20	0.456096	0.609	0.384	5.45e-16	0	CLMP	corneal stroma
RNF150	7.3e-25	0.456096	0.737	0.504	1.43e-20	0	RNF150	corneal stroma
ARHGAP8	5.81e-26	0.45587	0.509	0.264	1.14e-21	0	ARHGAP8	corneal stroma
CREB3L1	4.32e-21	0.455819	0.636	0.421	8.47e-17	0	CREB3L1	corneal stroma
SYT6	1.54e-22	0.454411	0.455	0.237	3.02e-18	0	SYT6	corneal stroma
CRYL1	5.53e-23	0.45383	0.565	0.333	1.09e-18	0	CRYL1	corneal stroma
OXCT1	1.24e-25	0.453236	0.619	0.369	2.43e-21	0	OXCT1	corneal stroma
FSTL1	1.18e-25	0.453064	0.688	0.423	2.31e-21	0	FSTL1	corneal stroma
SLC6A2	3.78e-26	0.453025	0.496	0.245	7.42e-22	0	SLC6A2	corneal stroma
ITGA11	1.62e-23	0.452628	0.604	0.387	3.17e-19	0	ITGA11	corneal stroma
RBFOX2	8.99e-24	0.451503	0.889	0.764	1.76e-19	0	RBFOX2	corneal stroma
FAM65B	1.38e-19	0.45141	0.538	0.333	2.71e-15	0	FAM65B	corneal stroma
SHROOM4	2.6e-23	0.451055	0.545	0.298	5.09e-19	0	SHROOM4	corneal stroma
RFX2	3.83e-19	0.450634	0.823	0.766	7.51e-15	0	RFX2	corneal stroma
SIK3	9.09e-18	0.449164	0.803	0.691	1.78e-13	0	SIK3	corneal stroma
NFATC2	1.08e-15	0.448597	0.784	0.644	2.11e-11	0	NFATC2	corneal stroma
FANCC	1.03e-16	0.448398	0.767	0.597	2.01e-12	0	FANCC	corneal stroma
SP9	4.52e-33	0.447954	0.354	0.128	8.86e-29	0	SP9	corneal stroma
IL1RL2	2.54e-29	0.446716	0.398	0.168	4.97e-25	0	IL1RL2	corneal stroma
TACC2	1.54e-22	0.446689	0.794	0.556	3.02e-18	0	TACC2	corneal stroma
ANKRD44	4.87e-17	0.446386	0.708	0.512	9.55e-13	0	ANKRD44	corneal stroma
NTNG1	7.21e-15	0.445659	0.553	0.374	1.41e-10	0	NTNG1	corneal stroma
BFSP2	3.84e-22	0.445366	0.479	0.256	7.53e-18	0	BFSP2	corneal stroma
AC013264.1	4.67e-17	0.444539	0.693	0.494	9.16e-13	0	AC013264.1	corneal stroma
PALD1	8.38e-23	0.444413	0.641	0.394	1.64e-18	0	PALD1	corneal stroma
MICALCL	2.69e-23	0.444055	0.531	0.295	5.27e-19	0	MICALCL	corneal stroma
C1orf87	2.72e-30	0.441178	0.366	0.139	5.33e-26	0	C1orf87	corneal stroma
PRDM5	3.01e-19	0.438663	0.528	0.328	5.9e-15	0	PRDM5	corneal stroma
CACHD1	9.23e-20	0.438618	0.72	0.499	1.81e-15	0	CACHD1	corneal stroma
TBX18	3.38e-27	0.438508	0.597	0.325	6.63e-23	0	TBX18	corneal stroma
DNMBP	3.54e-21	0.437664	0.614	0.402	6.94e-17	0	DNMBP	corneal stroma
ARSB	1.77e-20	0.437657	0.752	0.567	3.47e-16	0	ARSB	corneal stroma
PLEKHO1	3.48e-23	0.435248	0.57	0.336	6.82e-19	0	PLEKHO1	corneal stroma
IL17RD	3.04e-17	0.435233	0.631	0.438	5.96e-13	0	IL17RD	corneal stroma
OSBPL10	1.84e-20	0.434951	0.693	0.471	3.61e-16	0	OSBPL10	corneal stroma
WWC2	6.75e-24	0.434663	0.725	0.477	1.32e-19	0	WWC2	corneal stroma
PTPN14	2.17e-18	0.434425	0.666	0.458	4.26e-14	0	PTPN14	corneal stroma
CLMN	1.47e-13	0.434384	0.595	0.43	2.88e-09	0	CLMN	corneal stroma
CD109	3.05e-24	0.433606	0.499	0.262	5.98e-20	0	CD109	corneal stroma
TSPAN18	2.77e-19	0.433027	0.781	0.59	5.44e-15	0	TSPAN18	corneal stroma
KIF6	1.82e-18	0.432902	0.614	0.42	3.57e-14	0	KIF6	corneal stroma
DKK2	4.9e-20	0.430763	0.59	0.367	9.61e-16	0	DKK2	corneal stroma
MSRA	6.69e-17	0.429704	0.7	0.512	1.31e-12	0	MSRA	corneal stroma
PDE7B	8.26e-20	0.429315	0.688	0.472	1.62e-15	0	PDE7B	corneal stroma
ELK3	8.3e-19	0.429183	0.572	0.365	1.63e-14	0	ELK3	corneal stroma
ARHGEF10	5.99e-19	0.427435	0.732	0.514	1.17e-14	0	ARHGEF10	corneal stroma
RPTOR	3.02e-17	0.427358	0.823	0.642	5.92e-13	0	RPTOR	corneal stroma
CRYBG3	3.12e-21	0.427132	0.531	0.308	6.12e-17	0	CRYBG3	corneal stroma
TGFBI	1.27e-20	0.426997	0.545	0.315	2.48e-16	0	TGFBI	corneal stroma
ZBTB16	2.48e-22	0.425737	0.816	0.601	4.87e-18	0	ZBTB16	corneal stroma
HTRA3	9.43e-22	0.424408	0.467	0.247	1.85e-17	0	HTRA3	corneal stroma
AHRR	8.07e-20	0.424058	0.72	0.525	1.58e-15	0	AHRR	corneal stroma
EDNRA	4.65e-29	0.423995	0.437	0.188	9.12e-25	0	EDNRA	corneal stroma
KIAA1683	1.15e-17	0.423981	0.59	0.377	2.26e-13	0	KIAA1683	corneal stroma
NAV1	2.99e-21	0.423966	0.784	0.546	5.87e-17	0	NAV1	corneal stroma
SPAG17	7.93e-16	0.423343	0.563	0.366	1.56e-11	0	SPAG17	corneal stroma
TBC1D22A	7.25e-20	0.42215	0.779	0.632	1.42e-15	0	TBC1D22A	corneal stroma
LEF1	5.39e-18	0.421975	0.558	0.356	1.06e-13	0	LEF1	corneal stroma
BCAS1	2.37e-14	0.421535	0.376	0.215	4.64e-10	0	BCAS1	corneal stroma
IFNGR2	9.97e-17	0.421355	0.514	0.324	1.95e-12	0	IFNGR2	corneal stroma
SLA	8.02e-23	0.420988	0.526	0.291	1.57e-18	0	SLA	corneal stroma
CAMK1D	1.96e-16	0.419391	0.796	0.688	3.83e-12	0	CAMK1D	corneal stroma
RPL37A	2.18e-17	0.418367	0.59	0.403	4.27e-13	0	RPL37A	corneal stroma
DCPS	3.64e-17	0.418358	0.649	0.456	7.13e-13	0	DCPS	corneal stroma
PELI2	1.71e-11	0.418103	0.627	0.48	3.35e-07	0	PELI2	corneal stroma
TOX	2.44e-22	0.417321	0.764	0.504	4.78e-18	0	TOX	corneal stroma
FRMD6	2.71e-14	0.417214	0.693	0.549	5.31e-10	0	FRMD6	corneal stroma
CA12	2.26e-05	0.417151	0.28	0.193	0.442374	0	CA12	corneal stroma
ITGA8	3.6e-23	0.416589	0.464	0.24	7.06e-19	0	ITGA8	corneal stroma
AXIN2	1.8e-15	0.416026	0.639	0.445	3.52e-11	0	AXIN2	corneal stroma
SPATS2L	1.57e-22	0.415656	0.705	0.468	3.08e-18	0	SPATS2L	corneal stroma
BFSP1	1.86e-16	0.415639	0.695	0.529	3.66e-12	0	BFSP1	corneal stroma
SVEP1	5.88e-24	0.415245	0.516	0.281	1.15e-19	0	SVEP1	corneal stroma
SULF1	2.77e-22	0.415178	0.661	0.412	5.43e-18	0	SULF1	corneal stroma
ANKRD28	5.25e-16	0.41517	0.713	0.546	1.03e-11	0	ANKRD28	corneal stroma
C4orf45	1.35e-22	0.414847	0.45	0.236	2.65e-18	0	C4orf45	corneal stroma
C9orf3	3.29e-19	0.414686	0.833	0.637	6.45e-15	0	C9orf3	corneal stroma
ANO2	1.09e-18	0.414442	0.619	0.42	2.13e-14	0	ANO2	corneal stroma
ATF6B	4.83e-18	0.413756	0.764	0.618	9.47e-14	0	ATF6B	corneal stroma
DENND2A	1.38e-18	0.413487	0.791	0.63	2.72e-14	0	DENND2A	corneal stroma
TSPAN8	6.11e-14	0.412464	0.528	0.359	1.2e-09	0	TSPAN8	corneal stroma
RHOJ	7.15e-20	0.411947	0.482	0.271	1.4e-15	0	RHOJ	corneal stroma
FAT4	3.54e-21	0.411816	0.688	0.443	6.95e-17	0	FAT4	corneal stroma
FBN2	2.41e-23	0.411591	0.794	0.558	4.72e-19	0	FBN2	corneal stroma
ARNT2	5.76e-19	0.41108	0.597	0.377	1.13e-14	0	ARNT2	corneal stroma
TNS4	5.85e-19	0.410813	0.349	0.169	1.15e-14	0	TNS4	corneal stroma
SEPHS1	6.17e-15	0.410772	0.585	0.42	1.21e-10	0	SEPHS1	corneal stroma
SAMD5	3.64e-17	0.410543	0.572	0.365	7.14e-13	0	SAMD5	corneal stroma
CPE	3.93e-20	0.410099	0.528	0.317	7.71e-16	0	CPE	corneal stroma
CMKLR1	1.6e-20	0.40954	0.364	0.172	3.14e-16	0	CMKLR1	corneal stroma
ADAMTS14	3.81e-16	0.409185	0.528	0.338	7.48e-12	0	ADAMTS14	corneal stroma
SMAD3	1.01e-19	0.40838	0.845	0.659	1.99e-15	0	SMAD3	corneal stroma
NPAS2	3.47e-20	0.408318	0.577	0.356	6.8e-16	0	NPAS2	corneal stroma
SH3D19	1.22e-19	0.408005	0.661	0.438	2.39e-15	0	SH3D19	corneal stroma
TTLL5	8.11e-15	0.40751	0.816	0.705	1.59e-10	0	TTLL5	corneal stroma
ENTPD1	1.9e-19	0.406967	0.383	0.19	3.72e-15	0	ENTPD1	corneal stroma
TP53RK	1.01e-15	0.406436	0.568	0.375	1.98e-11	0	TP53RK	corneal stroma
TBC1D2B	1.36e-19	0.406259	0.681	0.457	2.66e-15	0	TBC1D2B	corneal stroma
HMGA2	1.35e-17	0.405731	0.663	0.456	2.64e-13	0	HMGA2	corneal stroma
SH3PXD2A	3.05e-22	0.4056	0.88	0.635	5.98e-18	0	SH3PXD2A	corneal stroma
DSCR8	3.39e-37	0.405516	0.369	0.121	6.66e-33	0	DSCR8	corneal stroma
COL13A1	2.25e-20	0.404543	0.683	0.456	4.4e-16	0	COL13A1	corneal stroma
IL1R1	2.23e-19	0.403848	0.496	0.285	4.38e-15	0	IL1R1	corneal stroma
SCMH1	1.36e-15	0.403635	0.614	0.425	2.68e-11	0	SCMH1	corneal stroma
BEND5	1.25e-19	0.403115	0.391	0.2	2.46e-15	0	BEND5	corneal stroma
GREM2	2.4e-22	0.402315	0.413	0.206	4.71e-18	0	GREM2	corneal stroma
PTGFR	1.1e-23	0.401833	0.467	0.237	2.15e-19	0	PTGFR	corneal stroma
C9	1.25e-22	0.401637	0.501	0.274	2.44e-18	0	C9	corneal stroma
PLEKHA5	4.01e-20	0.401611	0.688	0.461	7.87e-16	0	PLEKHA5	corneal stroma
DYM	1.73e-15	0.401476	0.668	0.519	3.4e-11	0	DYM	corneal stroma
DCN	3.78e-22	0.400284	0.376	0.17	7.42e-18	0	DCN	corneal stroma
LDLRAD4	5.28e-18	0.400274	0.838	0.651	1.04e-13	0	LDLRAD4	corneal stroma
EVA1A	7.9e-19	0.400243	0.514	0.3	1.55e-14	0	EVA1A	corneal stroma
AC010412.1	6.95e-32	0.399891	0.351	0.124	1.36e-27	0	AC010412.1	corneal stroma
PLEKHG1	7.5e-21	0.399533	0.789	0.575	1.47e-16	0	PLEKHG1	corneal stroma
RGS22	1.79e-21	0.399281	0.43	0.216	3.51e-17	0	RGS22	corneal stroma
TSPAN11	8.28e-21	0.398926	0.56	0.332	1.62e-16	0	TSPAN11	corneal stroma
MLLT3	9.23e-16	0.398029	0.73	0.556	1.81e-11	0	MLLT3	corneal stroma
AKAP2	5.33e-16	0.398021	0.617	0.416	1.04e-11	0	AKAP2	corneal stroma
CNKSR3	8.2e-20	0.397761	0.646	0.423	1.61e-15	0	CNKSR3	corneal stroma
TMEM204	5.77e-19	0.397116	0.327	0.154	1.13e-14	0	TMEM204	corneal stroma
KIAA0825	2.14e-18	0.396511	0.656	0.443	4.19e-14	0	KIAA0825	corneal stroma
TPST1	4.74e-15	0.3963	0.683	0.526	9.29e-11	0	TPST1	corneal stroma
PAX1	2.65e-43	0.395224	0.295	0.07	5.2e-39	0	PAX1	corneal stroma
C6orf89	8.5e-12	0.39454	0.666	0.553	1.67e-07	0	C6orf89	corneal stroma
FRMD3	1.96e-15	0.394054	0.609	0.415	3.84e-11	0	FRMD3	corneal stroma
RND3	3.66e-15	0.39338	0.526	0.34	7.18e-11	0	RND3	corneal stroma
TMEM200B	1.25e-16	0.393221	0.494	0.306	2.46e-12	0	TMEM200B	corneal stroma
TACC1	5.09e-13	0.393217	0.69	0.532	9.98e-09	0	TACC1	corneal stroma
KLF9	2.93e-17	0.393184	0.565	0.369	5.74e-13	0	KLF9	corneal stroma
SLFN12L	2.68e-36	0.392684	0.319	0.096	5.25e-32	0	SLFN12L	corneal stroma
VCL	7.65e-16	0.392606	0.779	0.663	1.5e-11	0	VCL	corneal stroma
TNRC18	9.23e-16	0.392418	0.816	0.606	1.81e-11	0	TNRC18	corneal stroma
RP11-96O20.4	1.07e-14	0.391814	0.582	0.413	2.1e-10	0	RP11-96O20.4	corneal stroma
GFOD1	8.61e-16	0.391158	0.627	0.426	1.69e-11	0	GFOD1	corneal stroma
EBF1	8.18e-21	0.390751	0.867	0.632	1.6e-16	0	EBF1	corneal stroma
TRIM66	7.94e-29	0.390688	0.41	0.175	1.56e-24	0	TRIM66	corneal stroma
DCHS1	1.5e-18	0.390656	0.59	0.377	2.95e-14	0	DCHS1	corneal stroma
DAB2	7.2e-23	0.390606	0.464	0.239	1.41e-18	0	DAB2	corneal stroma
ARHGAP31	2.08e-16	0.390551	0.631	0.441	4.08e-12	0	ARHGAP31	corneal stroma
FGF10	1.76e-22	0.390293	0.398	0.19	3.45e-18	0	FGF10	corneal stroma
ACAD11	1.2e-14	0.388686	0.442	0.27	2.36e-10	0	ACAD11	corneal stroma
SHC4	5.91e-13	0.387467	0.55	0.395	1.16e-08	0	SHC4	corneal stroma
TTC39B	1.48e-21	0.387342	0.639	0.413	2.9e-17	0	TTC39B	corneal stroma
ETS2	1.14e-19	0.387288	0.477	0.264	2.24e-15	0	ETS2	corneal stroma
CLDN14	2.58e-08	0.387239	0.31	0.196	0.000506527	0	CLDN14	corneal stroma
PLA2R1	1.08e-24	0.386999	0.477	0.245	2.13e-20	0	PLA2R1	corneal stroma
PLPPR5	8.54e-25	0.386969	0.442	0.211	1.67e-20	0	PLPPR5	corneal stroma
ADCY5	4.65e-21	0.386602	0.649	0.409	9.12e-17	0	ADCY5	corneal stroma
WHRN	3.38e-20	0.386574	0.673	0.436	6.63e-16	0	WHRN	corneal stroma
MYL3	1.7e-16	0.384922	0.477	0.285	3.33e-12	0	MYL3	corneal stroma
MITF	3.29e-17	0.384822	0.565	0.374	6.44e-13	0	MITF	corneal stroma
RP5-1052I5.2	8.63e-11	0.384658	0.548	0.406	1.69e-06	0	RP5-1052I5.2	corneal stroma
FBLN2	2.37e-12	0.383579	0.531	0.357	4.65e-08	0	FBLN2	corneal stroma
RNGTT	1.25e-15	0.383365	0.703	0.54	2.46e-11	0	RNGTT	corneal stroma
PRDM1	2e-25	0.383315	0.29	0.104	3.93e-21	0	PRDM1	corneal stroma
CCND2	1.62e-22	0.382595	0.727	0.458	3.17e-18	0	CCND2	corneal stroma
CPA5	4.89e-16	0.382504	0.45	0.257	9.59e-12	0	CPA5	corneal stroma
ADAMTS17	1.87e-14	0.381605	0.769	0.59	3.67e-10	0	ADAMTS17	corneal stroma
SMUG1	1.93e-12	0.380966	0.533	0.38	3.79e-08	0	SMUG1	corneal stroma
CRTC1	7.83e-09	0.380718	0.641	0.555	0.00015354	0	CRTC1	corneal stroma
ARID5A	2.34e-17	0.380647	0.518	0.324	4.59e-13	0	ARID5A	corneal stroma
CROCC2	4.76e-15	0.380358	0.531	0.34	9.32e-11	0	CROCC2	corneal stroma
NIPAL2	1.83e-17	0.380212	0.423	0.233	3.58e-13	0	NIPAL2	corneal stroma
CYFIP2	5.55e-14	0.3797	0.585	0.415	1.09e-09	0	CYFIP2	corneal stroma
SULT1B1	3.37e-20	0.379392	0.378	0.181	6.61e-16	0	SULT1B1	corneal stroma
LPAR1	6.36e-20	0.379045	0.555	0.331	1.25e-15	0	LPAR1	corneal stroma
AHNAK	3.02e-15	0.378644	0.767	0.597	5.92e-11	0	AHNAK	corneal stroma
TRIM29	3.3e-19	0.378426	0.509	0.295	6.47e-15	0	TRIM29	corneal stroma
HECW2	1.67e-15	0.378342	0.656	0.478	3.27e-11	0	HECW2	corneal stroma
ADCY8	3.36e-16	0.378247	0.472	0.282	6.59e-12	0	ADCY8	corneal stroma
GNAO1	9.55e-10	0.377989	0.614	0.481	1.87e-05	0	GNAO1	corneal stroma
SEMA6A	1.06e-18	0.377935	0.666	0.417	2.08e-14	0	SEMA6A	corneal stroma
CSGALNACT1	3.7e-19	0.377777	0.646	0.432	7.25e-15	0	CSGALNACT1	corneal stroma
PXDC1	2.44e-11	0.377685	0.511	0.352	4.79e-07	0	PXDC1	corneal stroma
ATXN10	7.33e-15	0.377636	0.572	0.375	1.44e-10	0	ATXN10	corneal stroma
AFAP1L2	1.82e-14	0.377577	0.568	0.377	3.58e-10	0	AFAP1L2	corneal stroma
CDH11	8.58e-15	0.376667	0.713	0.508	1.68e-10	0	CDH11	corneal stroma
TTYH2	1.66e-12	0.376251	0.555	0.391	3.26e-08	0	TTYH2	corneal stroma
HDAC4	5.74e-17	0.375486	0.919	0.864	1.13e-12	0	HDAC4	corneal stroma
PCDH18	1.23e-16	0.375137	0.393	0.215	2.42e-12	0	PCDH18	corneal stroma
LRRC17	4.4e-19	0.375102	0.437	0.231	8.62e-15	0	LRRC17	corneal stroma
NEDD4	4.14e-15	0.374684	0.506	0.32	8.11e-11	0	NEDD4	corneal stroma
PITPNB	1.23e-13	0.374605	0.681	0.569	2.42e-09	0	PITPNB	corneal stroma
BMF	2.09e-13	0.374229	0.747	0.616	4.11e-09	0	BMF	corneal stroma
SQRDL	1.04e-19	0.373988	0.346	0.161	2.03e-15	0	SQRDL	corneal stroma
ATP10A	8.1e-16	0.373399	0.531	0.334	1.59e-11	0	ATP10A	corneal stroma
ANGPT1	2.77e-15	0.373335	0.518	0.332	5.43e-11	0	ANGPT1	corneal stroma
AGPAT4	1.35e-12	0.372964	0.671	0.537	2.64e-08	0	AGPAT4	corneal stroma
PMEPA1	2.22e-18	0.372775	0.656	0.425	4.36e-14	0	PMEPA1	corneal stroma
TNKS1BP1	2.63e-14	0.37259	0.767	0.635	5.16e-10	0	TNKS1BP1	corneal stroma
AMPD3	1.47e-11	0.372416	0.705	0.574	2.88e-07	0	AMPD3	corneal stroma
GJC1	4.85e-25	0.37241	0.4	0.18	9.51e-21	0	GJC1	corneal stroma
FRK	7.58e-19	0.37227	0.302	0.132	1.49e-14	0	FRK	corneal stroma
ATOH8	8.16e-19	0.372243	0.681	0.448	1.6e-14	0	ATOH8	corneal stroma
DSE	2.55e-14	0.371955	0.821	0.67	4.99e-10	0	DSE	corneal stroma
RP11-302B13.5	3.55e-15	0.371693	0.678	0.498	6.96e-11	0	RP11-302B13.5	corneal stroma
AL161905.1	8.52e-19	0.370705	0.322	0.145	1.67e-14	0	AL161905.1	corneal stroma
VTI1A	4.15e-15	0.370677	0.676	0.501	8.14e-11	0	VTI1A	corneal stroma
COL20A1	4.82e-13	0.370353	0.391	0.239	9.44e-09	0	COL20A1	corneal stroma
PLXNC1	7.64e-15	0.369827	0.678	0.481	1.5e-10	0	PLXNC1	corneal stroma
DDAH1	6.64e-23	0.369636	0.715	0.458	1.3e-18	0	DDAH1	corneal stroma
MEIS2	9.09e-15	0.369437	0.595	0.392	1.78e-10	0	MEIS2	corneal stroma
PPP5C	2.5e-12	0.369392	0.597	0.457	4.89e-08	0	PPP5C	corneal stroma
FAM107B	1.35e-16	0.36924	0.742	0.572	2.65e-12	0	FAM107B	corneal stroma
SLC16A2	8.58e-23	0.369178	0.536	0.286	1.68e-18	0	SLC16A2	corneal stroma
HAS2	3.03e-16	0.368994	0.472	0.277	5.95e-12	0	HAS2	corneal stroma
PPM1H	6.06e-19	0.368882	0.752	0.531	1.19e-14	0	PPM1H	corneal stroma
TTC27	5.68e-12	0.368154	0.587	0.426	1.11e-07	0	TTC27	corneal stroma
GXYLT2	1.84e-14	0.367795	0.764	0.617	3.62e-10	0	GXYLT2	corneal stroma
IQGAP2	4.45e-11	0.367066	0.727	0.614	8.73e-07	0	IQGAP2	corneal stroma
CLIP2	9.71e-14	0.367025	0.582	0.406	1.9e-09	0	CLIP2	corneal stroma
FGF2	7.78e-18	0.365984	0.501	0.296	1.53e-13	0	FGF2	corneal stroma
ACOXL	3.47e-14	0.365517	0.644	0.464	6.81e-10	0	ACOXL	corneal stroma
CLUAP1	1.32e-16	0.364743	0.472	0.277	2.59e-12	0	CLUAP1	corneal stroma
LCN9	1.23e-33	0.364586	0.236	0.057	2.42e-29	0	LCN9	corneal stroma
ATP6AP1L	3.88e-11	0.364585	0.553	0.403	7.6e-07	0	ATP6AP1L	corneal stroma
TGFB3	6.26e-18	0.364451	0.531	0.323	1.23e-13	0	TGFB3	corneal stroma
OLFML2A	8.33e-14	0.364124	0.373	0.214	1.63e-09	0	OLFML2A	corneal stroma
HFM1	1.59e-14	0.36403	0.41	0.242	3.13e-10	0	HFM1	corneal stroma
CBR4	4.15e-12	0.363955	0.668	0.543	8.15e-08	0	CBR4	corneal stroma
PPP2R1B	1.07e-13	0.363645	0.681	0.535	2.1e-09	0	PPP2R1B	corneal stroma
CWC27	1.13e-05	0.363344	0.477	0.365	0.222236	0	CWC27	corneal stroma
CROCC	5.82e-18	0.363229	0.894	0.739	1.14e-13	0	CROCC	corneal stroma
WLS	3.1e-14	0.363221	0.612	0.413	6.07e-10	0	WLS	corneal stroma
BCL11A	3.2e-16	0.36312	0.713	0.501	6.27e-12	0	BCL11A	corneal stroma
C10orf90	7.29e-16	0.363059	0.467	0.286	1.43e-11	0	C10orf90	corneal stroma
C1QTNF2	5.95e-20	0.362869	0.376	0.186	1.17e-15	0	C1QTNF2	corneal stroma
APCDD1	2e-16	0.362564	0.378	0.203	3.92e-12	0	APCDD1	corneal stroma
IL16	1.09e-18	0.362295	0.486	0.279	2.13e-14	0	IL16	corneal stroma
SLC27A6	8.39e-21	0.360358	0.767	0.552	1.64e-16	0	SLC27A6	corneal stroma
NRP2	8.42e-17	0.360015	0.7	0.493	1.65e-12	0	NRP2	corneal stroma
KIAA0930	1.8e-09	0.359864	0.496	0.364	3.52e-05	0	KIAA0930	corneal stroma
COLQ	2.82e-12	0.35913	0.324	0.18	5.52e-08	0	COLQ	corneal stroma
COL6A5	3.73e-17	0.358861	0.354	0.18	7.31e-13	0	COL6A5	corneal stroma
MYC	2.2e-16	0.357858	0.693	0.497	4.32e-12	0	MYC	corneal stroma
FLRT2	6.39e-14	0.357647	0.609	0.409	1.25e-09	0	FLRT2	corneal stroma
BAHCC1	2.31e-15	0.357596	0.818	0.653	4.53e-11	0	BAHCC1	corneal stroma
CRIM1	3.31e-12	0.357296	0.786	0.655	6.49e-08	0	CRIM1	corneal stroma
COL3A1	2.32e-22	0.357235	0.491	0.246	4.56e-18	0	COL3A1	corneal stroma
DHRS3	5.14e-17	0.356989	0.56	0.356	1.01e-12	0	DHRS3	corneal stroma
NIN	5.43e-10	0.356945	0.538	0.396	1.06e-05	0	NIN	corneal stroma
ATP2B4	5.95e-14	0.356541	0.695	0.506	1.17e-09	0	ATP2B4	corneal stroma
PXK	9.19e-14	0.356025	0.555	0.384	1.8e-09	0	PXK	corneal stroma
RASSF8	3.59e-16	0.355865	0.59	0.387	7.03e-12	0	RASSF8	corneal stroma
GNAQ	9.3e-12	0.355039	0.74	0.589	1.82e-07	0	GNAQ	corneal stroma
BMPR1A	1.23e-15	0.354663	0.725	0.537	2.41e-11	0	BMPR1A	corneal stroma
EPB41L2	3.17e-13	0.354466	0.649	0.48	6.21e-09	0	EPB41L2	corneal stroma
PCDHGC3	6.21e-14	0.354462	0.688	0.505	1.22e-09	0	PCDHGC3	corneal stroma
ATG5	8.68e-13	0.354258	0.663	0.495	1.7e-08	0	ATG5	corneal stroma
ADCY9	3e-11	0.354018	0.666	0.538	5.88e-07	0	ADCY9	corneal stroma
CDKL1	4.13e-10	0.353596	0.55	0.416	8.1e-06	0	CDKL1	corneal stroma
FLI1	5.93e-14	0.353448	0.553	0.366	1.16e-09	0	FLI1	corneal stroma
FER1L6	2.8e-14	0.353408	0.563	0.374	5.49e-10	0	FER1L6	corneal stroma
ADAM22	5.13e-16	0.353365	0.545	0.357	1.01e-11	0	ADAM22	corneal stroma
TPM4	5.78e-16	0.353073	0.538	0.349	1.13e-11	0	TPM4	corneal stroma
SPIDR	4e-18	0.352746	0.845	0.671	7.84e-14	0	SPIDR	corneal stroma
EGFLAM	3.43e-14	0.352305	0.521	0.333	6.72e-10	0	EGFLAM	corneal stroma
LRCH1	7.75e-15	0.352189	0.654	0.466	1.52e-10	0	LRCH1	corneal stroma
COL25A1	1.55e-14	0.352186	0.695	0.511	3.04e-10	0	COL25A1	corneal stroma
TLN2	1.2e-16	0.351148	0.708	0.529	2.35e-12	0	TLN2	corneal stroma
ZNF423	1.53e-19	0.350253	0.916	0.729	3.01e-15	0	ZNF423	corneal stroma
MTUS1	1.38e-17	0.349928	0.666	0.451	2.7e-13	0	MTUS1	corneal stroma
ME3	8.72e-14	0.349889	0.713	0.516	1.71e-09	0	ME3	corneal stroma
PTGS2	8.55e-20	0.349753	0.349	0.16	1.68e-15	0	PTGS2	corneal stroma
NEDD9	2.47e-14	0.34969	0.654	0.459	4.83e-10	0	NEDD9	corneal stroma
SHISA6	5.02e-13	0.349276	0.504	0.331	9.85e-09	0	SHISA6	corneal stroma
CPA4	3.52e-28	0.349238	0.3	0.102	6.9e-24	0	CPA4	corneal stroma
LMNTD1	3e-20	0.348913	0.548	0.323	5.87e-16	0	LMNTD1	corneal stroma
PRSS12	1.04e-14	0.347765	0.459	0.281	2.05e-10	0	PRSS12	corneal stroma
RASA3	1.35e-14	0.347601	0.779	0.596	2.64e-10	0	RASA3	corneal stroma
AGMO	7.21e-11	0.34759	0.432	0.294	1.41e-06	0	AGMO	corneal stroma
UBASH3B	1.11e-13	0.347456	0.59	0.404	2.17e-09	0	UBASH3B	corneal stroma
EEPD1	7.61e-14	0.347396	0.823	0.745	1.49e-09	0	EEPD1	corneal stroma
EIF4G3	3.77e-13	0.347123	0.681	0.514	7.38e-09	0	EIF4G3	corneal stroma
BTBD11	1.48e-13	0.347049	0.695	0.521	2.9e-09	0	BTBD11	corneal stroma
NCAM1	1.06e-15	0.346653	0.74	0.528	2.08e-11	0	NCAM1	corneal stroma
RAPH1	1e-15	0.346486	0.563	0.361	1.97e-11	0	RAPH1	corneal stroma
SCG5	4.08e-16	0.346102	0.346	0.179	8e-12	0	SCG5	corneal stroma
STARD9	8.1e-11	0.345467	0.717	0.624	1.59e-06	0	STARD9	corneal stroma
RUSC2	5.35e-14	0.344744	0.543	0.368	1.05e-09	0	RUSC2	corneal stroma
NINL	1.29e-11	0.34414	0.536	0.372	2.54e-07	0	NINL	corneal stroma
ZNF516	1.4e-13	0.343702	0.767	0.574	2.74e-09	0	ZNF516	corneal stroma
COL28A1	2.05e-16	0.343184	0.405	0.222	4.03e-12	0	COL28A1	corneal stroma
HOXD3	4.31e-16	0.343174	0.349	0.18	8.45e-12	0	HOXD3	corneal stroma
SH3BP5	3.06e-18	0.342699	0.609	0.391	5.99e-14	0	SH3BP5	corneal stroma
CHN2	2.32e-10	0.342528	0.622	0.451	4.54e-06	0	CHN2	corneal stroma
HECTD2	2.17e-14	0.342478	0.575	0.387	4.25e-10	0	HECTD2	corneal stroma
MYO10	7.88e-16	0.342412	0.744	0.52	1.54e-11	0	MYO10	corneal stroma
LAMB1	1.62e-13	0.342229	0.545	0.36	3.18e-09	0	LAMB1	corneal stroma
IFT43	3.8e-14	0.34194	0.683	0.501	7.46e-10	0	IFT43	corneal stroma
PRR5L	2.19e-16	0.340741	0.587	0.389	4.29e-12	0	PRR5L	corneal stroma
ANXA2	2.78e-11	0.340703	0.634	0.495	5.45e-07	0	ANXA2	corneal stroma
PCDHGB6	2.43e-13	0.34015	0.717	0.539	4.77e-09	0	PCDHGB6	corneal stroma
LDLR	2.08e-10	0.339882	0.624	0.492	4.08e-06	0	LDLR	corneal stroma
IGDCC4	1.72e-12	0.339375	0.553	0.386	3.38e-08	0	IGDCC4	corneal stroma
MRPL33	1.61e-11	0.339193	0.641	0.51	3.16e-07	0	MRPL33	corneal stroma
RNF122	2.41e-14	0.338808	0.592	0.41	4.72e-10	0	RNF122	corneal stroma
TRERF1	5.34e-16	0.338379	0.737	0.534	1.05e-11	0	TRERF1	corneal stroma
PPARG	9.9e-15	0.337979	0.337	0.179	1.94e-10	0	PPARG	corneal stroma
ENC1	3.06e-13	0.337374	0.484	0.31	6e-09	0	ENC1	corneal stroma
GRIN3A	7.27e-12	0.337006	0.4	0.246	1.43e-07	0	GRIN3A	corneal stroma
MCC	2.48e-16	0.336621	0.813	0.633	4.87e-12	0	MCC	corneal stroma
PCGF2	1e-14	0.336534	0.609	0.422	1.97e-10	0	PCGF2	corneal stroma
MAD1L1	1.15e-15	0.336399	0.899	0.768	2.25e-11	0	MAD1L1	corneal stroma
PCDHGA12	4.17e-13	0.336123	0.695	0.516	8.17e-09	0	PCDHGA12	corneal stroma
HTRA1	8.39e-12	0.336029	0.425	0.274	1.64e-07	0	HTRA1	corneal stroma
ZNF503	1.56e-14	0.335821	0.636	0.442	3.07e-10	0	ZNF503	corneal stroma
AL365273.1	7.95e-24	0.335649	0.201	0.057	1.56e-19	0	AL365273.1	corneal stroma
PDGFRL	3.13e-14	0.335532	0.489	0.313	6.13e-10	0	PDGFRL	corneal stroma
NHSL2	1.93e-16	0.335496	0.73	0.515	3.78e-12	0	NHSL2	corneal stroma
SH3BP1	1.96e-09	0.335349	0.752	0.67	3.84e-05	0	SH3BP1	corneal stroma
KCNB1	7.23e-12	0.335334	0.617	0.467	1.42e-07	0	KCNB1	corneal stroma
PCDHGB7	6.02e-13	0.335057	0.705	0.528	1.18e-08	0	PCDHGB7	corneal stroma
PCDHGA11	4.33e-13	0.334943	0.7	0.523	8.5e-09	0	PCDHGA11	corneal stroma
PCDHGA9	3.71e-13	0.334908	0.72	0.542	7.27e-09	0	PCDHGA9	corneal stroma
NKD1	2.25e-15	0.334872	0.629	0.43	4.4e-11	0	NKD1	corneal stroma
SHF	9.9e-13	0.334224	0.722	0.545	1.94e-08	0	SHF	corneal stroma
ALDH1A1	2.71e-20	0.333412	0.369	0.176	5.3e-16	0	ALDH1A1	corneal stroma
SRPX	2.67e-16	0.333321	0.3	0.14	5.23e-12	0	SRPX	corneal stroma
INMT-FAM188B	2.59e-12	0.332443	0.619	0.453	5.08e-08	0	INMT-FAM188B	corneal stroma
CPED1	1.37e-12	0.332257	0.74	0.591	2.68e-08	0	CPED1	corneal stroma
PCDHGA10	7.04e-13	0.332243	0.708	0.532	1.38e-08	0	PCDHGA10	corneal stroma
PIEZO2	2.36e-17	0.331889	0.715	0.493	4.62e-13	0	PIEZO2	corneal stroma
FLNB	2.68e-14	0.331603	0.654	0.463	5.26e-10	0	FLNB	corneal stroma
SNX18	7.6e-12	0.331361	0.494	0.343	1.49e-07	0	SNX18	corneal stroma
CPNE2	3.18e-15	0.331304	0.472	0.277	6.23e-11	0	CPNE2	corneal stroma
SLC25A26	2.29e-11	0.331201	0.681	0.528	4.5e-07	0	SLC25A26	corneal stroma
CBFA2T3	8.29e-07	0.331102	0.619	0.494	0.0162603	0	CBFA2T3	corneal stroma
MPPED2	1.15e-12	0.330623	0.641	0.443	2.25e-08	0	MPPED2	corneal stroma
PCDHGB5	7.33e-13	0.330474	0.72	0.545	1.44e-08	0	PCDHGB5	corneal stroma
GRIA3	5.3e-14	0.330137	0.393	0.223	1.04e-09	0	GRIA3	corneal stroma
CYP26B1	1.96e-16	0.330133	0.447	0.258	3.84e-12	0	CYP26B1	corneal stroma
PDPN	1.96e-18	0.329766	0.334	0.157	3.85e-14	0	PDPN	corneal stroma
MRC2	1.15e-11	0.329479	0.627	0.476	2.26e-07	0	MRC2	corneal stroma
FLNC	2.46e-14	0.329392	0.627	0.431	4.82e-10	0	FLNC	corneal stroma
TTC6	1.49e-14	0.329317	0.545	0.356	2.92e-10	0	TTC6	corneal stroma
PROS1	4.34e-12	0.329289	0.43	0.272	8.52e-08	0	PROS1	corneal stroma
Z83313.1	4.68e-17	0.329233	0.435	0.241	9.18e-13	0	Z83313.1	corneal stroma
MUSK	2.11e-17	0.328534	0.342	0.17	4.13e-13	0	MUSK	corneal stroma
TPBG	1.7e-22	0.328175	0.42	0.2	3.32e-18	0	TPBG	corneal stroma
KCNE4	3.07e-16	0.327926	0.447	0.26	6.03e-12	0	KCNE4	corneal stroma
BCL9	1.17e-11	0.327313	0.821	0.718	2.29e-07	0	BCL9	corneal stroma
ARHGAP44	9.16e-16	0.32698	0.472	0.281	1.8e-11	0	ARHGAP44	corneal stroma
CLIC5	4.66e-14	0.326947	0.369	0.204	9.14e-10	0	CLIC5	corneal stroma
SLC25A21	1.53e-12	0.326752	0.602	0.446	3.01e-08	0	SLC25A21	corneal stroma
ARL15	3.41e-13	0.32637	0.769	0.608	6.69e-09	0	ARL15	corneal stroma
FAM188B	7.65e-12	0.326367	0.597	0.438	1.5e-07	0	FAM188B	corneal stroma
LGALS1	2.35e-14	0.326119	0.486	0.31	4.6e-10	0	LGALS1	corneal stroma
PCDHGA7	1.28e-12	0.326094	0.725	0.55	2.51e-08	0	PCDHGA7	corneal stroma
PDE11A	3.4e-06	0.326048	0.553	0.442	0.0666553	0	PDE11A	corneal stroma
PBX4	4.79e-13	0.325626	0.526	0.354	9.39e-09	0	PBX4	corneal stroma
ZNF106	2.16e-14	0.32544	0.612	0.43	4.23e-10	0	ZNF106	corneal stroma
PCDHGA8	1.24e-12	0.325199	0.72	0.548	2.44e-08	0	PCDHGA8	corneal stroma
SH3GL3	4.46e-14	0.324793	0.469	0.3	8.74e-10	0	SH3GL3	corneal stroma
ANO3	6.27e-12	0.324514	0.474	0.312	1.23e-07	0	ANO3	corneal stroma
PCDHGB4	9.1e-13	0.324251	0.725	0.55	1.79e-08	0	PCDHGB4	corneal stroma
FGFR1	4.29e-14	0.323776	0.619	0.417	8.42e-10	0	FGFR1	corneal stroma
CPNE8	2.24e-08	0.323716	0.457	0.324	0.000439218	0	CPNE8	corneal stroma
NID1	6.57e-17	0.323378	0.553	0.349	1.29e-12	0	NID1	corneal stroma
FHOD3	6.75e-14	0.323156	0.727	0.551	1.32e-09	0	FHOD3	corneal stroma
EBF3	4.41e-11	0.322936	0.695	0.497	8.65e-07	0	EBF3	corneal stroma
PEBP4	6.88e-14	0.322663	0.762	0.582	1.35e-09	0	PEBP4	corneal stroma
SLC35F4	6.05e-07	0.322575	0.499	0.372	0.0118705	0	SLC35F4	corneal stroma
PBK	7.4e-16	0.322401	0.283	0.132	1.45e-11	0	PBK	corneal stroma
OSMR	1.35e-16	0.321904	0.371	0.193	2.65e-12	0	OSMR	corneal stroma
PEPD	3.66e-10	0.321746	0.617	0.479	7.18e-06	0	PEPD	corneal stroma
VAV3	2.71e-13	0.321688	0.543	0.37	5.32e-09	0	VAV3	corneal stroma
SLC41A2	1.46e-06	0.321636	0.373	0.265	0.0286888	0	SLC41A2	corneal stroma
NBAS	5.92e-06	0.321503	0.555	0.46	0.116121	0	NBAS	corneal stroma
ARHGAP26	2.46e-20	0.321002	0.887	0.692	4.82e-16	0	ARHGAP26	corneal stroma
KERA	1.59e-44	0.320587	0.251	0.048	3.11e-40	0	KERA	corneal stroma
C11orf49	9.6e-14	0.320548	0.629	0.463	1.88e-09	0	C11orf49	corneal stroma
ATP9A	3.93e-15	0.320479	0.636	0.43	7.71e-11	0	ATP9A	corneal stroma
OSR2	1.63e-16	0.320428	0.413	0.223	3.2e-12	0	OSR2	corneal stroma
FKBP5	1.18e-08	0.320302	0.631	0.527	0.000232182	0	FKBP5	corneal stroma
ANXA11	1.75e-08	0.320202	0.43	0.301	0.000344094	0	ANXA11	corneal stroma
TES	4.62e-14	0.320103	0.464	0.285	9.06e-10	0	TES	corneal stroma
MX1	3.15e-22	0.319922	0.317	0.128	6.18e-18	0	MX1	corneal stroma
SCUBE2	5.43e-14	0.319837	0.472	0.298	1.06e-09	0	SCUBE2	corneal stroma
SRPX2	2.12e-25	0.319835	0.295	0.105	4.16e-21	0	SRPX2	corneal stroma
ADGRL1	9.85e-13	0.319771	0.693	0.535	1.93e-08	0	ADGRL1	corneal stroma
TAS2R1	4.76e-14	0.319653	0.307	0.157	9.32e-10	0	TAS2R1	corneal stroma
EFS	1.29e-13	0.319574	0.445	0.267	2.54e-09	0	EFS	corneal stroma
CDC42EP5	3.37e-13	0.319443	0.457	0.287	6.61e-09	0	CDC42EP5	corneal stroma
PDLIM4	1.64e-10	0.319381	0.504	0.347	3.21e-06	0	PDLIM4	corneal stroma
PCDHGB2	3.16e-12	0.319323	0.732	0.562	6.19e-08	0	PCDHGB2	corneal stroma
PCDHGA6	2.14e-12	0.319287	0.73	0.556	4.2e-08	0	PCDHGA6	corneal stroma
ZNF365	1.83e-11	0.31928	0.501	0.344	3.59e-07	0	ZNF365	corneal stroma
HEG1	2.22e-10	0.319184	0.509	0.364	4.36e-06	0	HEG1	corneal stroma
PCDHGA5	3.35e-12	0.318741	0.73	0.56	6.57e-08	0	PCDHGA5	corneal stroma
ETV1	9.68e-12	0.318721	0.681	0.499	1.9e-07	0	ETV1	corneal stroma
CEBPA	4.57e-12	0.318709	0.346	0.199	8.95e-08	0	CEBPA	corneal stroma
CHD6	1.59e-09	0.318674	0.695	0.583	3.12e-05	0	CHD6	corneal stroma
ADAMTS4	1.17e-13	0.318424	0.396	0.235	2.29e-09	0	ADAMTS4	corneal stroma
ARF3	6.33e-12	0.318233	0.55	0.394	1.24e-07	0	ARF3	corneal stroma
ADGRD1	1.2e-12	0.318112	0.614	0.429	2.36e-08	0	ADGRD1	corneal stroma
PCDHGA2	3.42e-12	0.317518	0.737	0.569	6.7e-08	0	PCDHGA2	corneal stroma
ACVR1	1.07e-11	0.317381	0.641	0.485	2.11e-07	0	ACVR1	corneal stroma
AC002429.5	5.95e-17	0.317162	0.369	0.191	1.17e-12	0	AC002429.5	corneal stroma
RCAN2	4.89e-10	0.317147	0.472	0.324	9.59e-06	0	RCAN2	corneal stroma
PCNX2	1.37e-17	0.317003	0.568	0.366	2.68e-13	0	PCNX2	corneal stroma
TTC21B	2.3e-10	0.316986	0.619	0.502	4.52e-06	0	TTC21B	corneal stroma
PCDHGA3	2.59e-12	0.316929	0.737	0.567	5.08e-08	0	PCDHGA3	corneal stroma
FBXL13	2.95e-12	0.316831	0.808	0.719	5.79e-08	0	FBXL13	corneal stroma
KCNN2	4.6e-14	0.316689	0.511	0.336	9.02e-10	0	KCNN2	corneal stroma
TGIF1	7.75e-13	0.316605	0.749	0.643	1.52e-08	0	TGIF1	corneal stroma
PCDHGB3	3.32e-12	0.31646	0.73	0.557	6.52e-08	0	PCDHGB3	corneal stroma
KIF13B	1.41e-12	0.316192	0.572	0.421	2.77e-08	0	KIF13B	corneal stroma
PCDHGA4	6.08e-12	0.315391	0.732	0.563	1.19e-07	0	PCDHGA4	corneal stroma
LRIG3	5.31e-16	0.315382	0.541	0.336	1.04e-11	0	LRIG3	corneal stroma
ETV6	1.09e-14	0.31531	0.767	0.548	2.14e-10	0	ETV6	corneal stroma
GAS1	7.17e-11	0.315026	0.59	0.425	1.41e-06	0	GAS1	corneal stroma
FYN	2.04e-13	0.314806	0.894	0.788	4e-09	0	FYN	corneal stroma
PCDHGB1	5.17e-12	0.314509	0.735	0.565	1.01e-07	0	PCDHGB1	corneal stroma
GDPD4	2.15e-27	0.314492	0.268	0.084	4.22e-23	0	GDPD4	corneal stroma
GRIP1	1.62e-09	0.314116	0.565	0.417	3.19e-05	0	GRIP1	corneal stroma
PCDHGA1	5.19e-12	0.313614	0.737	0.571	1.02e-07	0	PCDHGA1	corneal stroma
SH2D4B	4.18e-14	0.313608	0.381	0.217	8.2e-10	0	SH2D4B	corneal stroma
DISP1	5.46e-16	0.313126	0.398	0.217	1.07e-11	0	DISP1	corneal stroma
FOSL2	6.62e-13	0.312942	0.732	0.546	1.3e-08	0	FOSL2	corneal stroma
RERG	1.87e-15	0.312722	0.538	0.345	3.66e-11	0	RERG	corneal stroma
ANGPTL5	1.05e-14	0.312528	0.491	0.3	2.05e-10	0	ANGPTL5	corneal stroma
DNAH10	5.03e-15	0.312303	0.464	0.284	9.87e-11	0	DNAH10	corneal stroma
FAM65C	1.42e-12	0.311636	0.673	0.518	2.79e-08	0	FAM65C	corneal stroma
WDR74	1.18e-10	0.31154	0.732	0.61	2.31e-06	0	WDR74	corneal stroma
TULP4	1.69e-07	0.311508	0.673	0.585	0.00331317	0	TULP4	corneal stroma
CHRNA1	1.67e-13	0.311456	0.413	0.247	3.28e-09	0	CHRNA1	corneal stroma
COL8A1	1.8e-17	0.311137	0.445	0.246	3.53e-13	0	COL8A1	corneal stroma
FNDC1	1.29e-17	0.310909	0.428	0.233	2.52e-13	0	FNDC1	corneal stroma
HEXB	1.04e-12	0.309789	0.577	0.393	2.04e-08	0	HEXB	corneal stroma
GCOM1	3.8e-13	0.309709	0.509	0.325	7.46e-09	0	GCOM1	corneal stroma
COLEC12	2.12e-13	0.309553	0.688	0.512	4.15e-09	0	COLEC12	corneal stroma
SORL1	3.36e-12	0.309384	0.506	0.328	6.59e-08	0	SORL1	corneal stroma
SCAI	2.14e-07	0.309301	0.636	0.57	0.00420193	0	SCAI	corneal stroma
AEBP1	2.05e-13	0.309116	0.351	0.196	4.02e-09	0	AEBP1	corneal stroma
RNASE4	7.15e-13	0.309062	0.536	0.354	1.4e-08	0	RNASE4	corneal stroma
ANG	8.98e-13	0.308919	0.528	0.349	1.76e-08	0	ANG	corneal stroma
PLAC9	2.82e-16	0.308896	0.332	0.166	5.53e-12	0	PLAC9	corneal stroma
ZNF608	7.33e-13	0.308642	0.764	0.556	1.44e-08	0	ZNF608	corneal stroma
ITPR2	4.25e-07	0.308331	0.688	0.605	0.00833945	0	ITPR2	corneal stroma
VEGFC	2.35e-16	0.30824	0.369	0.193	4.6e-12	0	VEGFC	corneal stroma
NEURL1	6.74e-10	0.307422	0.516	0.364	1.32e-05	0	NEURL1	corneal stroma
UVRAG	1.5e-07	0.306915	0.803	0.736	0.00294134	0	UVRAG	corneal stroma
PDLIM2	2.05e-09	0.306698	0.435	0.307	4.01e-05	0	PDLIM2	corneal stroma
CUEDC1	9.69e-18	0.306509	0.845	0.603	1.9e-13	0	CUEDC1	corneal stroma
PDGFRB	1.35e-10	0.306332	0.59	0.428	2.64e-06	0	PDGFRB	corneal stroma
INTS9	1.03e-10	0.306246	0.813	0.723	2.01e-06	0	INTS9	corneal stroma
SSUH2	8.31e-13	0.306244	0.457	0.287	1.63e-08	0	SSUH2	corneal stroma
ERGIC1	9.35e-12	0.306115	0.661	0.495	1.83e-07	0	ERGIC1	corneal stroma
PIK3CB	2.85e-10	0.305756	0.553	0.403	5.59e-06	0	PIK3CB	corneal stroma
GPR1	1.56e-12	0.305473	0.162	0.063	3.06e-08	0	GPR1	corneal stroma
ENSA	3.62e-12	0.304971	0.791	0.677	7.1e-08	0	ENSA	corneal stroma
CGNL1	7.79e-13	0.304874	0.548	0.372	1.53e-08	0	CGNL1	corneal stroma
COL5A3	1.44e-11	0.30461	0.373	0.226	2.82e-07	0	COL5A3	corneal stroma
NREP	2.29e-14	0.30456	0.781	0.593	4.49e-10	0	NREP	corneal stroma
TPK1	7.11e-11	0.304327	0.568	0.409	1.39e-06	0	TPK1	corneal stroma
PIK3C2G	1.58e-12	0.304228	0.506	0.329	3.09e-08	0	PIK3C2G	corneal stroma
VCAN	9.65e-13	0.304177	0.7	0.499	1.89e-08	0	VCAN	corneal stroma
LECT2	5.29e-28	0.304078	0.243	0.072	1.04e-23	0	LECT2	corneal stroma
MVB12B	1.6e-09	0.304054	0.624	0.466	3.14e-05	0	MVB12B	corneal stroma
PRLR	2.87e-14	0.30396	0.415	0.244	5.63e-10	0	PRLR	corneal stroma
CPXM2	1.13e-11	0.303828	0.459	0.294	2.21e-07	0	CPXM2	corneal stroma
TVP23C	2.09e-11	0.303677	0.373	0.235	4.1e-07	0	TVP23C	corneal stroma
UNC5B	9.51e-12	0.303472	0.639	0.459	1.86e-07	0	UNC5B	corneal stroma
EPHX1	9.8e-11	0.303352	0.459	0.312	1.92e-06	0	EPHX1	corneal stroma
TNFAIP8	8.27e-07	0.303262	0.639	0.542	0.0162059	0	TNFAIP8	corneal stroma
CFAP161	5.32e-16	0.303176	0.467	0.276	1.04e-11	0	CFAP161	corneal stroma
HS3ST4	0.000170715	0.303154	0.44	0.347	1	0	HS3ST4	corneal stroma
ST3GAL4	3.27e-07	0.302873	0.592	0.468	0.00641539	0	ST3GAL4	corneal stroma
FAM227B	6.7e-13	0.30231	0.58	0.402	1.31e-08	0	FAM227B	corneal stroma
SPARC	2.42e-11	0.301927	0.563	0.38	4.74e-07	0	SPARC	corneal stroma
ADAMTS12	5.77e-13	0.301852	0.548	0.374	1.13e-08	0	ADAMTS12	corneal stroma
DOCK2	1.33e-12	0.30087	0.654	0.475	2.61e-08	0	DOCK2	corneal stroma
TANC2	2.43e-11	0.300158	0.654	0.481	4.77e-07	0	TANC2	corneal stroma
CAV3	2.63e-12	0.300097	0.378	0.222	5.16e-08	0	CAV3	corneal stroma
NOVA1	8.08e-13	0.300062	0.624	0.435	1.58e-08	0	NOVA1	corneal stroma
NKD2	1.06e-12	0.29978	0.42	0.256	2.08e-08	0	NKD2	corneal stroma
C1QTNF1	3.02e-16	0.299747	0.371	0.196	5.92e-12	0	C1QTNF1	corneal stroma
DLEU7	4.04e-14	0.299008	0.376	0.211	7.92e-10	0	DLEU7	corneal stroma
SLC2A14	8.94e-16	0.298778	0.329	0.161	1.75e-11	0	SLC2A14	corneal stroma
ZNF521	7.16e-13	0.29868	0.799	0.613	1.4e-08	0	ZNF521	corneal stroma
ITPKB	6.4e-10	0.298348	0.703	0.542	1.26e-05	0	ITPKB	corneal stroma
MEF2C	1.95e-10	0.298104	0.553	0.4	3.82e-06	0	MEF2C	corneal stroma
MGLL	5.11e-08	0.297689	0.658	0.549	0.00100185	0	MGLL	corneal stroma
LTBP2	1.28e-13	0.297311	0.597	0.414	2.5e-09	0	LTBP2	corneal stroma
PTPN5	1.38e-13	0.297041	0.371	0.211	2.71e-09	0	PTPN5	corneal stroma
RGL1	1.73e-11	0.296944	0.806	0.71	3.4e-07	0	RGL1	corneal stroma
ANXA5	1.18e-10	0.296891	0.472	0.314	2.32e-06	0	ANXA5	corneal stroma
RHOQ	6.22e-09	0.296793	0.634	0.499	0.000121907	0	RHOQ	corneal stroma
RAB11FIP5	9.35e-10	0.296791	0.568	0.434	1.83e-05	0	RAB11FIP5	corneal stroma
PDE8B	5.34e-13	0.296699	0.452	0.285	1.05e-08	0	PDE8B	corneal stroma
FZD1	3.9e-13	0.296004	0.563	0.377	7.64e-09	0	FZD1	corneal stroma
KCTD1	4.11e-12	0.295897	0.619	0.436	8.06e-08	0	KCTD1	corneal stroma
MID2	1.56e-14	0.295769	0.275	0.131	3.07e-10	0	MID2	corneal stroma
GPR161	8.99e-10	0.295496	0.437	0.299	1.76e-05	0	GPR161	corneal stroma
KCNT2	3.98e-11	0.294758	0.614	0.448	7.81e-07	0	KCNT2	corneal stroma
BNC1	1.26e-23	0.294604	0.248	0.084	2.47e-19	0	BNC1	corneal stroma
KANK1	1.12e-10	0.29449	0.686	0.538	2.19e-06	0	KANK1	corneal stroma
RP11-903H12.5	3.53e-12	0.29435	0.511	0.337	6.92e-08	0	RP11-903H12.5	corneal stroma
EGR3	5.46e-10	0.294289	0.418	0.276	1.07e-05	0	EGR3	corneal stroma
TSPAN31	3.83e-11	0.294261	0.536	0.374	7.51e-07	0	TSPAN31	corneal stroma
SLC24A4	4.93e-12	0.293789	0.467	0.304	9.66e-08	0	SLC24A4	corneal stroma
STOX2	1.27e-08	0.293721	0.639	0.489	0.000248981	0	STOX2	corneal stroma
SH2D7	2.89e-10	0.293595	0.383	0.243	5.67e-06	0	SH2D7	corneal stroma
TMEM243	8.27e-10	0.293445	0.354	0.224	1.62e-05	0	TMEM243	corneal stroma
AC009336.19	3.08e-16	0.293411	0.253	0.109	6.03e-12	0	AC009336.19	corneal stroma
C16orf62	9.25e-10	0.293204	0.693	0.6	1.81e-05	0	C16orf62	corneal stroma
RAB27B	8.75e-11	0.292514	0.373	0.231	1.72e-06	0	RAB27B	corneal stroma
MX2	4.3e-21	0.292335	0.268	0.102	8.43e-17	0	MX2	corneal stroma
SDPR	4.11e-18	0.292308	0.204	0.072	8.06e-14	0	SDPR	corneal stroma
RAI1	1.24e-11	0.292201	0.897	0.845	2.43e-07	0	RAI1	corneal stroma
VANGL2	1.65e-12	0.291977	0.521	0.348	3.23e-08	0	VANGL2	corneal stroma
MAGED1	7e-10	0.291933	0.506	0.355	1.37e-05	0	MAGED1	corneal stroma
SH3RF3	1.45e-13	0.291916	0.796	0.614	2.84e-09	0	SH3RF3	corneal stroma
NCALD	1.88e-08	0.291814	0.658	0.507	0.000368214	0	NCALD	corneal stroma
SNTG2	2.86e-13	0.291798	0.545	0.372	5.6e-09	0	SNTG2	corneal stroma
TMC1	2.67e-16	0.291215	0.531	0.341	5.24e-12	0	TMC1	corneal stroma
CAPZB	1.57e-09	0.291057	0.799	0.722	3.08e-05	0	CAPZB	corneal stroma
PTPN3	6.34e-09	0.290668	0.388	0.252	0.000124296	0	PTPN3	corneal stroma
GPR39	4.71e-12	0.290536	0.472	0.306	9.24e-08	0	GPR39	corneal stroma
ABI3BP	9.9e-15	0.290405	0.553	0.362	1.94e-10	0	ABI3BP	corneal stroma
CFAP46	3.59e-12	0.290066	0.474	0.308	7.03e-08	0	CFAP46	corneal stroma
IRX5	3.86e-09	0.28979	0.791	0.679	7.56e-05	0	IRX5	corneal stroma
AMOTL1	3.69e-12	0.289657	0.614	0.44	7.23e-08	0	AMOTL1	corneal stroma
SHOX2	6.34e-15	0.289643	0.305	0.15	1.24e-10	0	SHOX2	corneal stroma
NHS	1.35e-10	0.289601	0.639	0.461	2.65e-06	0	NHS	corneal stroma
SLC13A3	4.15e-09	0.289482	0.432	0.297	8.13e-05	0	SLC13A3	corneal stroma
CCDC140	1.43e-20	0.289417	0.201	0.064	2.8e-16	0	CCDC140	corneal stroma
SRGAP1	3.98e-08	0.289335	0.641	0.501	0.000779875	0	SRGAP1	corneal stroma
TNN	4.58e-15	0.28924	0.41	0.227	8.97e-11	0	TNN	corneal stroma
TEX13D	4.16e-14	0.289106	0.236	0.103	8.15e-10	0	TEX13D	corneal stroma
CABIN1	7.73e-10	0.288822	0.69	0.581	1.52e-05	0	CABIN1	corneal stroma
SKIV2L2	8.69e-10	0.288759	0.58	0.441	1.7e-05	0	SKIV2L2	corneal stroma
TRIM16	9.64e-12	0.288647	0.391	0.243	1.89e-07	0	TRIM16	corneal stroma
BACE2	4.38e-09	0.288224	0.44	0.299	8.59e-05	0	BACE2	corneal stroma
SPTLC3	5.01e-15	0.288216	0.339	0.178	9.82e-11	0	SPTLC3	corneal stroma
NTRK2	6.26e-10	0.288169	0.595	0.435	1.23e-05	0	NTRK2	corneal stroma
SORBS2	3.83e-14	0.287721	0.673	0.485	7.5e-10	0	SORBS2	corneal stroma
TUSC3	2.96e-11	0.287006	0.521	0.366	5.8e-07	0	TUSC3	corneal stroma
NOL10	4.48e-12	0.286973	0.486	0.324	8.78e-08	0	NOL10	corneal stroma
MGMT	1.04e-11	0.286916	0.693	0.535	2.03e-07	0	MGMT	corneal stroma
WARS2	1e-09	0.286429	0.604	0.481	1.96e-05	0	WARS2	corneal stroma
SPON2	1.73e-09	0.286312	0.528	0.382	3.4e-05	0	SPON2	corneal stroma
YAE1D1	3.17e-10	0.286234	0.388	0.251	6.22e-06	0	YAE1D1	corneal stroma
PLEKHG2	1.47e-10	0.286099	0.695	0.571	2.87e-06	0	PLEKHG2	corneal stroma
SLC26A7	7.41e-12	0.285954	0.383	0.236	1.45e-07	0	SLC26A7	corneal stroma
CLNK	6.76e-08	0.285773	0.369	0.25	0.00132507	0	CLNK	corneal stroma
BIN2	9.13e-24	0.28568	0.229	0.071	1.79e-19	0	BIN2	corneal stroma
METTL6	3.06e-16	0.285544	0.373	0.196	6.01e-12	0	METTL6	corneal stroma
IL23R	1.59e-14	0.285472	0.3	0.149	3.12e-10	0	IL23R	corneal stroma
KLHL23	1.35e-11	0.285379	0.666	0.528	2.65e-07	0	KLHL23	corneal stroma
2011-09-01	6.89e-10	0.285229	0.666	0.521	1.35e-05	0	2011-09-01	corneal stroma
NUMA1	2.63e-11	0.285128	0.799	0.708	5.16e-07	0	NUMA1	corneal stroma
PMP22	1.29e-15	0.284681	0.504	0.301	2.52e-11	0	PMP22	corneal stroma
DGKI	8.42e-08	0.284294	0.577	0.449	0.00165077	0	DGKI	corneal stroma
ZNF536	5.06e-14	0.284148	0.818	0.604	9.91e-10	0	ZNF536	corneal stroma
C15orf41	0.000572377	0.283988	0.369	0.287	1	0	C15orf41	corneal stroma
GRK3	5.01e-10	0.283932	0.504	0.365	9.83e-06	0	GRK3	corneal stroma
SLC2A9	1.21e-10	0.283631	0.658	0.491	2.38e-06	0	SLC2A9	corneal stroma
COL6A6	7.29e-17	0.283038	0.452	0.251	1.43e-12	0	COL6A6	corneal stroma
NFIC	3.4e-09	0.282989	0.715	0.611	6.66e-05	0	NFIC	corneal stroma
TRIM9	8.03e-09	0.282728	0.526	0.383	0.000157366	0	TRIM9	corneal stroma
SFMBT2	1.11e-09	0.28184	0.6	0.447	2.17e-05	0	SFMBT2	corneal stroma
XRCC4	1.31e-07	0.281568	0.55	0.435	0.00255996	0	XRCC4	corneal stroma
FGD5	0.00775939	0.281482	0.356	0.292	1	0	FGD5	corneal stroma
BCAT1	5.05e-05	0.281415	0.405	0.303	0.989802	0	BCAT1	corneal stroma
C12orf45	1.16e-08	0.281028	0.41	0.279	0.000228174	0	C12orf45	corneal stroma
PHGDH	4.25e-07	0.280709	0.391	0.274	0.00832911	0	PHGDH	corneal stroma
TEX14	3.34e-12	0.280434	0.722	0.548	6.55e-08	0	TEX14	corneal stroma
KCTD10	4.62e-10	0.280386	0.452	0.311	9.05e-06	0	KCTD10	corneal stroma
SLC9A3R2	7.4e-09	0.280017	0.44	0.311	0.000145031	0	SLC9A3R2	corneal stroma
DSCR4	1.35e-11	0.280008	0.285	0.153	2.65e-07	0	DSCR4	corneal stroma
CTSC	3.73e-11	0.279953	0.287	0.157	7.31e-07	0	CTSC	corneal stroma
BCL9L	3.39e-10	0.279756	0.681	0.542	6.64e-06	0	BCL9L	corneal stroma
PANO1	3.69e-06	0.279751	0.496	0.409	0.0722536	0	PANO1	corneal stroma
RBMS2	1.72e-11	0.279528	0.553	0.391	3.37e-07	0	RBMS2	corneal stroma
NID2	2.84e-10	0.279129	0.435	0.291	5.57e-06	0	NID2	corneal stroma
TLL2	1.05e-08	0.278833	0.56	0.443	0.000205615	0	TLL2	corneal stroma
SH2D1A	6.21e-11	0.278796	0.26	0.135	1.22e-06	0	SH2D1A	corneal stroma
ZDHHC21	6.69e-16	0.278771	0.292	0.137	1.31e-11	0	ZDHHC21	corneal stroma
DACT1	2.79e-10	0.278538	0.474	0.31	5.47e-06	0	DACT1	corneal stroma
COLEC10	1.32e-24	0.27846	0.354	0.146	2.59e-20	0	COLEC10	corneal stroma
CDH10	1.63e-14	0.278247	0.391	0.219	3.19e-10	0	CDH10	corneal stroma
RAB27A	1.62e-08	0.277667	0.457	0.327	0.00031723	0	RAB27A	corneal stroma
PBX1	8.83e-11	0.27719	0.875	0.723	1.73e-06	0	PBX1	corneal stroma
FAM196B	1.62e-12	0.276852	0.373	0.217	3.17e-08	0	FAM196B	corneal stroma
RP11-745O10.4	2.79e-09	0.276852	0.42	0.291	5.47e-05	0	RP11-745O10.4	corneal stroma
EPHB3	2.06e-13	0.276695	0.784	0.591	4.04e-09	0	EPHB3	corneal stroma
YAP1	1.9e-12	0.276643	0.644	0.459	3.72e-08	0	YAP1	corneal stroma
CHD3	1.42e-11	0.276489	0.619	0.438	2.79e-07	0	CHD3	corneal stroma
EPHB2	1.07e-13	0.276353	0.735	0.524	2.11e-09	0	EPHB2	corneal stroma
IRX3	5.31e-14	0.276164	0.437	0.255	1.04e-09	0	IRX3	corneal stroma
DLG5	1.64e-08	0.275778	0.531	0.392	0.000320964	0	DLG5	corneal stroma
PCDHGC5	1.27e-07	0.275562	0.496	0.366	0.00249868	0	PCDHGC5	corneal stroma
CNTN1	6.13e-12	0.275259	0.506	0.332	1.2e-07	0	CNTN1	corneal stroma
CCDC91	1.07e-07	0.275134	0.592	0.477	0.00210651	0	CCDC91	corneal stroma
TTLL11	1.27e-05	0.274754	0.627	0.555	0.249551	0	TTLL11	corneal stroma
GDAP1	2.75e-09	0.274608	0.477	0.336	5.4e-05	0	GDAP1	corneal stroma
ANKRD33	1.28e-23	0.274277	0.251	0.084	2.5e-19	0	ANKRD33	corneal stroma
EXT2	5.11e-10	0.274201	0.533	0.374	1e-05	0	EXT2	corneal stroma
NOV	5.82e-16	0.273896	0.278	0.126	1.14e-11	0	NOV	corneal stroma
MME	2.7e-12	0.273749	0.361	0.209	5.29e-08	0	MME	corneal stroma
SNTB1	1.23e-15	0.273643	0.585	0.386	2.41e-11	0	SNTB1	corneal stroma
VAT1L	0.00901513	0.273599	0.332	0.268	1	0	VAT1L	corneal stroma
FAM110B	1.49e-08	0.273431	0.666	0.519	0.00029204	0	FAM110B	corneal stroma
TMEM244	3.99e-24	0.272792	0.229	0.071	7.82e-20	0	TMEM244	corneal stroma
GREB1	2.43e-10	0.272728	0.531	0.383	4.77e-06	0	GREB1	corneal stroma
ALDH1L2	1.45e-11	0.272623	0.342	0.196	2.84e-07	0	ALDH1L2	corneal stroma
PLXDC2	5.26e-12	0.272523	0.698	0.527	1.03e-07	0	PLXDC2	corneal stroma
AASS	3.74e-10	0.272488	0.457	0.309	7.33e-06	0	AASS	corneal stroma
FMNL3	6.59e-09	0.272391	0.72	0.606	0.000129197	0	FMNL3	corneal stroma
CEP126	4.66e-11	0.272068	0.499	0.333	9.13e-07	0	CEP126	corneal stroma
CRABP2	4.05e-10	0.271849	0.44	0.289	7.94e-06	0	CRABP2	corneal stroma
WNT2B	9.72e-10	0.271275	0.467	0.319	1.91e-05	0	WNT2B	corneal stroma
SNX9	1.32e-08	0.271212	0.651	0.541	0.000257968	0	SNX9	corneal stroma
RSF1	3.04e-06	0.27121	0.769	0.711	0.0596061	0	RSF1	corneal stroma
GHR	8.07e-11	0.271169	0.558	0.379	1.58e-06	0	GHR	corneal stroma
CCDC149	5.82e-11	0.27101	0.452	0.292	1.14e-06	0	CCDC149	corneal stroma
EYA1	2.03e-09	0.270814	0.42	0.276	3.98e-05	0	EYA1	corneal stroma
SGPP2	2e-10	0.270744	0.354	0.217	3.93e-06	0	SGPP2	corneal stroma
NR3C2	2.52e-10	0.270677	0.673	0.521	4.94e-06	0	NR3C2	corneal stroma
ULBP2	1.04e-11	0.270629	0.317	0.176	2.04e-07	0	ULBP2	corneal stroma
ITGAV	1.85e-10	0.270571	0.425	0.274	3.63e-06	0	ITGAV	corneal stroma
OSBPL5	1.4e-10	0.270412	0.568	0.408	2.74e-06	0	OSBPL5	corneal stroma
ABLIM1	1.8e-09	0.270301	0.614	0.453	3.54e-05	0	ABLIM1	corneal stroma
ATP6V1E2	4.63e-09	0.270176	0.668	0.532	9.08e-05	0	ATP6V1E2	corneal stroma
SSPN	8.16e-09	0.270041	0.607	0.459	0.000159979	0	SSPN	corneal stroma
AKAP12	1.43e-07	0.270021	0.533	0.413	0.00279905	0	AKAP12	corneal stroma
PCDHGC4	8.86e-08	0.269985	0.543	0.409	0.00173637	0	PCDHGC4	corneal stroma
POLR2M	4.65e-11	0.269351	0.45	0.289	9.11e-07	0	POLR2M	corneal stroma
SYBU	6.13e-08	0.269187	0.489	0.367	0.00120255	0	SYBU	corneal stroma
CD37	4.31e-09	0.26916	0.415	0.28	8.45e-05	0	CD37	corneal stroma
SECTM1	1.04e-10	0.269043	0.265	0.145	2.05e-06	0	SECTM1	corneal stroma
PTPRR	2.76e-06	0.268809	0.396	0.29	0.0541693	0	PTPRR	corneal stroma
HLF	1.07e-12	0.268767	0.403	0.243	2.09e-08	0	HLF	corneal stroma
NEMP1	1.77e-09	0.268662	0.882	0.823	3.47e-05	0	NEMP1	corneal stroma
ME1	7.5e-08	0.268644	0.435	0.315	0.00147042	0	ME1	corneal stroma
TMEM255B	4.31e-11	0.268636	0.396	0.248	8.45e-07	0	TMEM255B	corneal stroma
GLP2R	2.07e-19	0.268571	0.209	0.071	4.06e-15	0	GLP2R	corneal stroma
SLC25A22	8.22e-06	0.268541	0.514	0.43	0.161261	0	SLC25A22	corneal stroma
FAM171B	8.86e-08	0.268522	0.369	0.248	0.00173769	0	FAM171B	corneal stroma
LIMD1	6.59e-10	0.268357	0.604	0.446	1.29e-05	0	LIMD1	corneal stroma
ANP32E	4.9e-07	0.268292	0.533	0.427	0.00960399	0	ANP32E	corneal stroma
NMI	1.97e-12	0.267332	0.216	0.098	3.86e-08	0	NMI	corneal stroma
ANKRD29	1.18e-14	0.267056	0.346	0.182	2.32e-10	0	ANKRD29	corneal stroma
IPCEF1	4.1e-12	0.266708	0.371	0.217	8.04e-08	0	IPCEF1	corneal stroma
EMX2	2.4e-11	0.266594	0.42	0.26	4.71e-07	0	EMX2	corneal stroma
STON1-GTF2A1L	1.58e-06	0.2665	0.536	0.438	0.0309767	0	STON1-GTF2A1L	corneal stroma
CHN1	6.35e-09	0.266198	0.548	0.408	0.000124593	0	CHN1	corneal stroma
DNM1	1.31e-06	0.266081	0.781	0.719	0.0257802	0	DNM1	corneal stroma
BTBD9	1.53e-11	0.26599	0.717	0.538	3e-07	0	BTBD9	corneal stroma
RP3-403A15.5	2.86e-08	0.265971	0.45	0.325	0.000561586	0	RP3-403A15.5	corneal stroma
PROX2	8.23e-16	0.265893	0.332	0.164	1.61e-11	0	PROX2	corneal stroma
PHLDB2	9.03e-12	0.26575	0.686	0.485	1.77e-07	0	PHLDB2	corneal stroma
RFX3	2.14e-07	0.265552	0.774	0.697	0.00420535	0	RFX3	corneal stroma
RNF152	4.69e-12	0.265489	0.435	0.266	9.19e-08	0	RNF152	corneal stroma
RIN3	3.17e-12	0.265221	0.563	0.392	6.21e-08	0	RIN3	corneal stroma
LRP4	3.91e-08	0.265111	0.393	0.273	0.00076755	0	LRP4	corneal stroma
SPSB1	1.87e-09	0.26499	0.614	0.464	3.67e-05	0	SPSB1	corneal stroma
ID2	3.23e-08	0.26494	0.715	0.593	0.000633373	0	ID2	corneal stroma
LOX	4.31e-14	0.264897	0.371	0.201	8.45e-10	0	LOX	corneal stroma
TTI2	1.52e-10	0.264887	0.641	0.488	2.98e-06	0	TTI2	corneal stroma
PTGER2	2.06e-11	0.264678	0.253	0.127	4.03e-07	0	PTGER2	corneal stroma
RGS10	2.97e-07	0.263995	0.457	0.339	0.00582829	0	RGS10	corneal stroma
FAM71F1	7.71e-30	0.263989	0.214	0.052	1.51e-25	0	FAM71F1	corneal stroma
ANGPT2	2.82e-14	0.263215	0.322	0.163	5.53e-10	0	ANGPT2	corneal stroma
MOV10L1	4.26e-10	0.263155	0.371	0.232	8.35e-06	0	MOV10L1	corneal stroma
WSCD2	1.01e-10	0.263031	0.314	0.177	1.99e-06	0	WSCD2	corneal stroma
DYNC2H1	2.98e-08	0.262733	0.538	0.407	0.000583727	0	DYNC2H1	corneal stroma
DIP2C	4.93e-14	0.262721	0.828	0.621	9.66e-10	0	DIP2C	corneal stroma
TSPAN5	1.35e-10	0.262652	0.681	0.551	2.65e-06	0	TSPAN5	corneal stroma
WDR86	1.18e-07	0.262624	0.371	0.251	0.00231787	0	WDR86	corneal stroma
ADAMTS18	1.01e-09	0.262561	0.369	0.234	1.98e-05	0	ADAMTS18	corneal stroma
PRR5-ARHGAP8	1.81e-05	0.262505	0.646	0.579	0.355867	0	PRR5-ARHGAP8	corneal stroma
KCNU1	3.72e-21	0.262095	0.292	0.118	7.3e-17	0	KCNU1	corneal stroma
HIF3A	1.04e-06	0.262078	0.634	0.535	0.0204669	0	HIF3A	corneal stroma
TRPM1	4.34e-12	0.261423	0.42	0.261	8.52e-08	0	TRPM1	corneal stroma
ARHGEF3	2.38e-09	0.260907	0.69	0.562	4.66e-05	0	ARHGEF3	corneal stroma
NTF3	6.21e-10	0.260595	0.447	0.302	1.22e-05	0	NTF3	corneal stroma
NCOR2	3.39e-11	0.260522	0.929	0.784	6.64e-07	0	NCOR2	corneal stroma
KIAA1755	1.66e-07	0.260462	0.332	0.226	0.00325479	0	KIAA1755	corneal stroma
PRKCZ	1.12e-07	0.260446	0.744	0.626	0.00220222	0	PRKCZ	corneal stroma
C9orf72	1.78e-08	0.260396	0.565	0.429	0.000348951	0	C9orf72	corneal stroma
AK5	2.05e-07	0.260238	0.494	0.359	0.0040216	0	AK5	corneal stroma
AKNA	5.29e-11	0.260014	0.408	0.254	1.04e-06	0	AKNA	corneal stroma
IER5L	2.52e-09	0.259777	0.514	0.373	4.94e-05	0	IER5L	corneal stroma
ISPD	2.15e-10	0.259729	0.536	0.396	4.21e-06	0	ISPD	corneal stroma
PLIN3	6.05e-10	0.259108	0.415	0.27	1.19e-05	0	PLIN3	corneal stroma
STAT2	2.78e-07	0.25905	0.612	0.516	0.00544168	0	STAT2	corneal stroma
FAM81A	1.48e-11	0.259049	0.543	0.378	2.91e-07	0	FAM81A	corneal stroma
P2RY14	5.87e-18	0.258236	0.327	0.149	1.15e-13	0	P2RY14	corneal stroma
KIRREL	2.15e-09	0.258174	0.688	0.509	4.22e-05	0	KIRREL	corneal stroma
ZFHX4	4.08e-11	0.258127	0.614	0.439	8e-07	0	ZFHX4	corneal stroma
LIMCH1	1.64e-10	0.258019	0.683	0.505	3.22e-06	0	LIMCH1	corneal stroma
WDR63	2.84e-08	0.257669	0.491	0.365	0.000557637	0	WDR63	corneal stroma
RP11-58C22.1	1.35e-06	0.257466	0.3	0.201	0.026479	0	RP11-58C22.1	corneal stroma
ZYX	2.72e-09	0.257346	0.565	0.411	5.34e-05	0	ZYX	corneal stroma
PLCXD1	9.18e-07	0.257247	0.447	0.336	0.018003	0	PLCXD1	corneal stroma
AMPH	3.23e-08	0.257194	0.445	0.316	0.00063313	0	AMPH	corneal stroma
MMP2	2.95e-10	0.256775	0.545	0.372	5.78e-06	0	MMP2	corneal stroma
SCOC	7.61e-07	0.256664	0.663	0.565	0.0149285	0	SCOC	corneal stroma
MROH9	1.13e-10	0.256312	0.226	0.113	2.21e-06	0	MROH9	corneal stroma
C1orf141	8.23e-10	0.255973	0.285	0.165	1.61e-05	0	C1orf141	corneal stroma
NEBL	1.59e-05	0.25574	0.55	0.416	0.312322	0	NEBL	corneal stroma
NPHP3-ACAD11	1.04e-05	0.255649	0.727	0.696	0.203079	0	NPHP3-ACAD11	corneal stroma
RP1-27O5.3	6.07e-09	0.255475	0.518	0.372	0.000119051	0	RP1-27O5.3	corneal stroma
EFHC2	1.01e-08	0.255322	0.26	0.149	0.000197584	0	EFHC2	corneal stroma
C11orf70	4.02e-17	0.255262	0.265	0.113	7.88e-13	0	C11orf70	corneal stroma
SSBP3	1.73e-07	0.254835	0.857	0.8	0.003386	0	SSBP3	corneal stroma
SCARF2	5.54e-08	0.254794	0.445	0.324	0.00108702	0	SCARF2	corneal stroma
SIPA1L2	2.41e-13	0.254757	0.432	0.261	4.72e-09	0	SIPA1L2	corneal stroma
WDR27	1.45e-07	0.25465	0.686	0.612	0.00284648	0	WDR27	corneal stroma
RP11-402G3.3	1.2e-21	0.254403	0.216	0.069	2.35e-17	0	RP11-402G3.3	corneal stroma
LRFN5	5.04e-09	0.254037	0.482	0.347	9.88e-05	0	LRFN5	corneal stroma
TNIP3	4.97e-13	0.253777	0.319	0.171	9.75e-09	0	TNIP3	corneal stroma
TRPC6	6.97e-07	0.253713	0.42	0.302	0.0136753	0	TRPC6	corneal stroma
CDC6	1.1e-05	0.253511	0.57	0.505	0.216213	0	CDC6	corneal stroma
ARMC4	2.83e-11	0.253428	0.361	0.215	5.54e-07	0	ARMC4	corneal stroma
SNAI2	5e-12	0.253327	0.344	0.192	9.8e-08	0	SNAI2	corneal stroma
PTPRS	4.82e-11	0.253206	0.742	0.575	9.45e-07	0	PTPRS	corneal stroma
LIPA	1.32e-08	0.253039	0.624	0.479	0.000259538	0	LIPA	corneal stroma
UBR1	1.81e-08	0.252909	0.445	0.319	0.000354075	0	UBR1	corneal stroma
PPP1R9A	1.39e-09	0.2528	0.56	0.417	2.73e-05	0	PPP1R9A	corneal stroma
MBOAT1	5.66e-09	0.252149	0.391	0.26	0.000110957	0	MBOAT1	corneal stroma
C10orf107	3.35e-12	0.25205	0.285	0.149	6.58e-08	0	C10orf107	corneal stroma
ATP10D	8.84e-08	0.251882	0.41	0.282	0.00173389	0	ATP10D	corneal stroma
ADAMTS20	3.86e-11	0.251827	0.378	0.23	7.56e-07	0	ADAMTS20	corneal stroma
CYBRD1	0.0023538	0.251505	0.307	0.234	1	0	CYBRD1	corneal stroma
CBLB	2.19e-06	0.251494	0.715	0.627	0.0429189	0	CBLB	corneal stroma
ARAP2	8.84e-06	0.251206	0.342	0.245	0.173403	0	ARAP2	corneal stroma
HMBOX1	1.35e-07	0.251099	0.806	0.733	0.00265572	0	HMBOX1	corneal stroma
FERMT2	2.55e-10	0.250984	0.572	0.413	4.99e-06	0	FERMT2	corneal stroma
ZNF460	1.25e-07	0.250959	0.631	0.522	0.00245835	0	ZNF460	corneal stroma
PSMB3	3.13e-08	0.250863	0.536	0.421	0.000613963	0	PSMB3	corneal stroma
VWF	9.38e-07	0.250849	0.428	0.311	0.0183881	0	VWF	corneal stroma
WNT5B	6.71e-09	0.250646	0.686	0.562	0.000131644	0	WNT5B	corneal stroma
TEAD2	2.2e-09	0.250388	0.528	0.382	4.31e-05	0	TEAD2	corneal stroma
ALX1	3.04e-15	0.2501	0.378	0.196	5.96e-11	0	ALX1	corneal stroma
TXLNB	1.01e-10	0.250088	0.371	0.221	1.97e-06	0	TXLNB	corneal stroma
ZDHHC19	7.47e-09	-0.250146	0.084	0.201	0.000146503	0	ZDHHC19	corneal stroma
SARM1	1.38e-07	-0.250175	0.236	0.361	0.00269802	0	SARM1	corneal stroma
ECHS1	1.28e-08	-0.250452	0.224	0.358	0.000251633	0	ECHS1	corneal stroma
USP15	5.49e-05	-0.250597	0.464	0.556	1	0	USP15	corneal stroma
SLC52A2	1.73e-08	-0.250623	0.162	0.294	0.000338532	0	SLC52A2	corneal stroma
GATB	8.55e-06	-0.250752	0.369	0.486	0.167623	0	GATB	corneal stroma
WDR18	1.68e-05	-0.250787	0.322	0.417	0.330068	0	WDR18	corneal stroma
RMND5B	5.06e-07	-0.250887	0.197	0.309	0.00992436	0	RMND5B	corneal stroma
METTL21A	3.77e-07	-0.250928	0.339	0.464	0.00738521	0	METTL21A	corneal stroma
ANTXRL	5.19e-06	-0.250949	0.189	0.289	0.101849	0	ANTXRL	corneal stroma
FADS1	1e-05	-0.250965	0.543	0.641	0.196128	0	FADS1	corneal stroma
PLK3	1.81e-07	-0.251037	0.464	0.588	0.003546	0	PLK3	corneal stroma
NKIRAS1	0.000196004	-0.251044	0.752	0.801	1	0	NKIRAS1	corneal stroma
GALNT10	0.00090929	-0.251079	0.619	0.666	1	0	GALNT10	corneal stroma
ZNF274	5.05e-07	-0.251302	0.305	0.435	0.00990378	0	ZNF274	corneal stroma
CAMSAP1	9.85e-08	-0.251382	0.474	0.609	0.00193174	0	CAMSAP1	corneal stroma
NELFA	3.11e-07	-0.251555	0.366	0.501	0.00609954	0	NELFA	corneal stroma
TBC1D24	1.72e-07	-0.251558	0.41	0.542	0.00337351	0	TBC1D24	corneal stroma
ZSWIM5	6.13e-06	-0.251795	0.585	0.693	0.120197	0	ZSWIM5	corneal stroma
ATG14	0.0008753	-0.252081	0.251	0.324	1	0	ATG14	corneal stroma
DNAAF2	2.86e-06	-0.252318	0.42	0.535	0.0559844	0	DNAAF2	corneal stroma
TMEM134	5.45e-08	-0.25247	0.349	0.48	0.00106841	0	TMEM134	corneal stroma
TMCO3	9.36e-07	-0.2529	0.432	0.553	0.0183619	0	TMCO3	corneal stroma
SARS	1.09e-07	-0.25299	0.243	0.372	0.00213286	0	SARS	corneal stroma
WDR26	0.000132926	-0.253034	0.349	0.438	1	0	WDR26	corneal stroma
C1orf228	3.07e-08	-0.253386	0.479	0.629	0.000602238	0	C1orf228	corneal stroma
YIF1B	6.15e-07	-0.253464	0.339	0.464	0.0120492	0	YIF1B	corneal stroma
SLC11A2	1.66e-07	-0.253541	0.329	0.45	0.00325663	0	SLC11A2	corneal stroma
OTUD4	1.77e-06	-0.253831	0.4	0.519	0.0347643	0	OTUD4	corneal stroma
MGAT1	0.000158136	-0.253832	0.6	0.678	1	0	MGAT1	corneal stroma
ARHGEF12	0.000136344	-0.253979	0.543	0.612	1	0	ARHGEF12	corneal stroma
NDUFA2	2.87e-07	-0.254088	0.378	0.5	0.00561767	0	NDUFA2	corneal stroma
PKDCC	6.35e-06	-0.254237	0.317	0.417	0.124505	0	PKDCC	corneal stroma
NUDT22	3.76e-07	-0.254341	0.332	0.465	0.00737221	0	NUDT22	corneal stroma
MST1	2.96e-09	-0.254411	0.174	0.312	5.8e-05	0	MST1	corneal stroma
HOMEZ	1.2e-05	-0.254469	0.538	0.625	0.235415	0	HOMEZ	corneal stroma
EHMT2	2.11e-05	-0.2547	0.251	0.342	0.412882	0	EHMT2	corneal stroma
TBC1D20	2.34e-08	-0.254706	0.285	0.432	0.00045892	0	TBC1D20	corneal stroma
CIRBP	6.64e-07	-0.254824	0.72	0.794	0.0130208	0	CIRBP	corneal stroma
ISY1-RAB43	0.000118272	-0.254851	0.627	0.695	1	0	ISY1-RAB43	corneal stroma
TRIM52	1.52e-05	-0.254942	0.295	0.401	0.297168	0	TRIM52	corneal stroma
CENPBD1	1.06e-07	-0.254993	0.199	0.324	0.00208475	0	CENPBD1	corneal stroma
HLA-DMA	7.9e-05	-0.255001	0.545	0.645	1	0	HLA-DMA	corneal stroma
PHF1	5.34e-05	-0.25511	0.555	0.626	1	0	PHF1	corneal stroma
STXBP2	3.19e-13	-0.255126	0.037	0.182	6.25e-09	0	STXBP2	corneal stroma
ROGDI	6.11e-07	-0.255333	0.398	0.51	0.0119703	0	ROGDI	corneal stroma
PSTK	3.28e-06	-0.25562	0.4	0.511	0.0643858	0	PSTK	corneal stroma
VPS51	1.4e-08	-0.255696	0.285	0.432	0.000274117	0	VPS51	corneal stroma
FLOT2	3.54e-10	-0.255822	0.147	0.298	6.94e-06	0	FLOT2	corneal stroma
EXOSC3	1.17e-05	-0.255858	0.275	0.38	0.228511	0	EXOSC3	corneal stroma
AEN	2.2e-05	-0.255924	0.268	0.364	0.431719	0	AEN	corneal stroma
MTIF3	2.64e-06	-0.256453	0.253	0.365	0.0517791	0	MTIF3	corneal stroma
HRAS	1.93e-07	-0.257085	0.378	0.509	0.00378025	0	HRAS	corneal stroma
ZDHHC18	1.96e-08	-0.257331	0.204	0.334	0.00038351	0	ZDHHC18	corneal stroma
PPFIA4	0.000276196	-0.25749	0.356	0.432	1	0	PPFIA4	corneal stroma
ZBTB34	1.64e-07	-0.257513	0.17	0.285	0.00321396	0	ZBTB34	corneal stroma
MADD	1.18e-06	-0.257698	0.455	0.575	0.0232336	0	MADD	corneal stroma
ACADM	0.000159234	-0.257727	0.413	0.489	1	0	ACADM	corneal stroma
RP11-87C12.2	1.44e-05	-0.257745	0.354	0.451	0.282163	0	RP11-87C12.2	corneal stroma
UBIAD1	2.41e-09	-0.257804	0.26	0.411	4.72e-05	0	UBIAD1	corneal stroma
SUMO3	6.28e-08	-0.258089	0.31	0.444	0.00123077	0	SUMO3	corneal stroma
CDHR2	8.2e-06	-0.258123	0.283	0.391	0.160764	0	CDHR2	corneal stroma
PPP1R16A	2.42e-07	-0.258439	0.29	0.425	0.00473799	0	PPP1R16A	corneal stroma
SCN9A	0.000318021	-0.258535	0.197	0.277	1	0	SCN9A	corneal stroma
IQSEC1	0.000659981	-0.258769	0.779	0.812	1	0	IQSEC1	corneal stroma
MAP3K6	2.77e-05	-0.258822	0.307	0.395	0.542763	0	MAP3K6	corneal stroma
CCDC88B	5.35e-08	-0.259149	0.204	0.336	0.00104879	0	CCDC88B	corneal stroma
RP11-977G19.10	1.67e-05	-0.259267	0.582	0.683	0.327929	0	RP11-977G19.10	corneal stroma
RP4-614O4.11	1.05e-08	-0.259313	0.16	0.289	0.000205061	0	RP4-614O4.11	corneal stroma
GOLGA3	4.61e-07	-0.259454	0.317	0.441	0.00903203	0	GOLGA3	corneal stroma
HIP1	5.6e-06	-0.259522	0.658	0.729	0.10986	0	HIP1	corneal stroma
ANGPT4	9.97e-06	-0.259587	0.108	0.195	0.195391	0	ANGPT4	corneal stroma
APOM	7.55e-05	-0.259666	0.452	0.528	1	0	APOM	corneal stroma
GMNN	6.93e-08	-0.25967	0.285	0.413	0.00135802	0	GMNN	corneal stroma
L3MBTL1	2.05e-06	-0.259703	0.364	0.477	0.0402506	0	L3MBTL1	corneal stroma
POLN	1.5e-06	-0.259713	0.442	0.57	0.0293886	0	POLN	corneal stroma
PPM1J	1.54e-06	-0.259765	0.263	0.371	0.0301109	0	PPM1J	corneal stroma
E2F1	6.94e-08	-0.259871	0.391	0.534	0.00136161	0	E2F1	corneal stroma
CLCN6	1.8e-07	-0.26017	0.477	0.604	0.00353353	0	CLCN6	corneal stroma
FLCN	2.1e-05	-0.260303	0.339	0.429	0.412354	0	FLCN	corneal stroma
HLCS	9.08e-05	-0.260341	0.531	0.613	1	0	HLCS	corneal stroma
AP5S1	2.21e-08	-0.260407	0.356	0.482	0.0004328	0	AP5S1	corneal stroma
ANKH	4.49e-05	-0.260457	0.437	0.517	0.88062	0	ANKH	corneal stroma
FAXDC2	2.68e-06	-0.260478	0.622	0.749	0.0524582	0	FAXDC2	corneal stroma
RBM17	1.66e-06	-0.260511	0.285	0.4	0.0325701	0	RBM17	corneal stroma
CDKN1C	4.44e-05	-0.260534	0.491	0.575	0.869798	0	CDKN1C	corneal stroma
LARP1B	0.000444192	-0.260553	0.452	0.518	1	0	LARP1B	corneal stroma
MYL5	2.78e-05	-0.260695	0.369	0.463	0.544893	0	MYL5	corneal stroma
ZFYVE28	4.87e-07	-0.26077	0.504	0.629	0.00953968	0	ZFYVE28	corneal stroma
MCRIP1	1.06e-07	-0.260935	0.265	0.391	0.00208602	0	MCRIP1	corneal stroma
GNG3	2.14e-07	-0.261137	0.317	0.439	0.00418691	0	GNG3	corneal stroma
PDGFC	0.0029639	-0.261181	0.314	0.386	1	0	PDGFC	corneal stroma
ENO1	0.000115325	-0.26127	0.442	0.524	1	0	ENO1	corneal stroma
TBC1D22B	0.000646588	-0.261306	0.41	0.486	1	0	TBC1D22B	corneal stroma
SDE2	4.43e-07	-0.26134	0.386	0.512	0.0086889	0	SDE2	corneal stroma
SMC3	1.83e-05	-0.261418	0.396	0.498	0.359562	0	SMC3	corneal stroma
MAN1B1	3.08e-07	-0.261582	0.4	0.519	0.00603218	0	MAN1B1	corneal stroma
PITPNA	7.13e-07	-0.261644	0.312	0.433	0.013976	0	PITPNA	corneal stroma
ZNF529	0.000228667	-0.261654	0.351	0.424	1	0	ZNF529	corneal stroma
FAM173A	6.89e-10	-0.261668	0.155	0.299	1.35e-05	0	FAM173A	corneal stroma
GINM1	4.31e-07	-0.261673	0.354	0.482	0.00844257	0	GINM1	corneal stroma
CDK8	3.37e-07	-0.261688	0.305	0.441	0.00660958	0	CDK8	corneal stroma
UBE2F	0.000124698	-0.261845	0.415	0.508	1	0	UBE2F	corneal stroma
CCDC117	4.4e-09	-0.262056	0.197	0.33	8.63e-05	0	CCDC117	corneal stroma
BCCIP	1.18e-08	-0.262076	0.199	0.335	0.000232276	0	BCCIP	corneal stroma
KRIT1	4.3e-06	-0.262569	0.246	0.35	0.0842538	0	KRIT1	corneal stroma
CORO2A	9.41e-06	-0.262581	0.189	0.288	0.184411	0	CORO2A	corneal stroma
HEBP2	2.37e-05	-0.262696	0.216	0.306	0.464434	0	HEBP2	corneal stroma
RTN4RL1	0.00150876	-0.262968	0.307	0.372	1	0	RTN4RL1	corneal stroma
TBK1	1.87e-06	-0.262972	0.265	0.387	0.0366368	0	TBK1	corneal stroma
OSBPL2	5.09e-07	-0.262986	0.459	0.583	0.00997091	0	OSBPL2	corneal stroma
C6orf120	9.89e-07	-0.263152	0.295	0.414	0.0193884	0	C6orf120	corneal stroma
LCOR	6.11e-05	-0.263158	0.565	0.647	1	0	LCOR	corneal stroma
GLYR1	1.09e-05	-0.263219	0.41	0.502	0.213345	0	GLYR1	corneal stroma
PRKAB1	3.88e-09	-0.263266	0.214	0.358	7.61e-05	0	PRKAB1	corneal stroma
BEST1	6.13e-06	-0.263663	0.28	0.387	0.120288	0	BEST1	corneal stroma
ZMIZ2	9.79e-07	-0.263759	0.459	0.581	0.0191874	0	ZMIZ2	corneal stroma
PI4K2B	1.58e-09	-0.26376	0.135	0.272	3.1e-05	0	PI4K2B	corneal stroma
CCSAP	6.62e-06	-0.263814	0.265	0.371	0.129798	0	CCSAP	corneal stroma
SLC37A4	1.22e-08	-0.263855	0.221	0.362	0.000239504	0	SLC37A4	corneal stroma
HN1L	1.9e-07	-0.263886	0.295	0.427	0.00373128	0	HN1L	corneal stroma
FBXO31	1.66e-05	-0.264168	0.722	0.781	0.325421	0	FBXO31	corneal stroma
RP11-146B14.1	8.05e-06	-0.264673	0.631	0.729	0.15791	0	RP11-146B14.1	corneal stroma
YDJC	8.13e-12	-0.264812	0.167	0.344	1.59e-07	0	YDJC	corneal stroma
PIK3AP1	5.05e-05	-0.264839	0.174	0.262	0.989953	0	PIK3AP1	corneal stroma
FAIM2	1.73e-05	-0.264884	0.275	0.372	0.338315	0	FAIM2	corneal stroma
RNF38	3.47e-05	-0.264986	0.604	0.688	0.67994	0	RNF38	corneal stroma
NUP62	5.04e-08	-0.265178	0.356	0.497	0.000988147	0	NUP62	corneal stroma
RNF10	3.02e-06	-0.265289	0.236	0.34	0.0591609	0	RNF10	corneal stroma
TAF6L	6.12e-07	-0.26538	0.45	0.576	0.0119989	0	TAF6L	corneal stroma
TPRA1	2.13e-05	-0.265394	0.56	0.652	0.418277	0	TPRA1	corneal stroma
CMPK2	6.78e-05	-0.2654	0.111	0.183	1	0	CMPK2	corneal stroma
RBX1	4.93e-07	-0.265489	0.548	0.652	0.00967236	0	RBX1	corneal stroma
NPC2	8.49e-09	-0.265508	0.42	0.579	0.000166412	0	NPC2	corneal stroma
ST6GALNAC4	3.73e-06	-0.265609	0.317	0.419	0.0731338	0	ST6GALNAC4	corneal stroma
MYL12B	4.68e-07	-0.265868	0.231	0.352	0.00917997	0	MYL12B	corneal stroma
ATF4	4.82e-06	-0.265885	0.484	0.572	0.0945985	0	ATF4	corneal stroma
FAM13B	1.01e-05	-0.265952	0.391	0.482	0.198539	0	FAM13B	corneal stroma
CD164	6e-07	-0.265987	0.42	0.525	0.011766	0	CD164	corneal stroma
MRPL55	2.95e-09	-0.26602	0.273	0.426	5.79e-05	0	MRPL55	corneal stroma
PRR14L	1.98e-06	-0.266227	0.386	0.496	0.0388184	0	PRR14L	corneal stroma
JSRP1	7.43e-06	-0.266259	0.521	0.603	0.145701	0	JSRP1	corneal stroma
ATF1	2.93e-06	-0.266561	0.322	0.435	0.0574747	0	ATF1	corneal stroma
ZNF746	4.26e-08	-0.266613	0.209	0.345	0.000834625	0	ZNF746	corneal stroma
SSC5D	1.15e-07	-0.266896	0.302	0.426	0.00225065	0	SSC5D	corneal stroma
ABCA2	7.34e-07	-0.266932	0.229	0.346	0.0143855	0	ABCA2	corneal stroma
CAMK2N2	1.52e-08	-0.267108	0.147	0.281	0.000297933	0	CAMK2N2	corneal stroma
WDR45	2.58e-07	-0.267738	0.405	0.527	0.0050661	0	WDR45	corneal stroma
HTATIP2	2.73e-08	-0.267757	0.074	0.179	0.000535696	0	HTATIP2	corneal stroma
WBP4	2.26e-05	-0.267862	0.506	0.599	0.44408	0	WBP4	corneal stroma
SNAP29	4.8e-06	-0.267927	0.432	0.525	0.09405	0	SNAP29	corneal stroma
MAP2K3	4.29e-08	-0.267931	0.472	0.604	0.000841251	0	MAP2K3	corneal stroma
COPS3	5.72e-07	-0.267946	0.415	0.542	0.0112211	0	COPS3	corneal stroma
RAD23A	1.47e-08	-0.267994	0.28	0.422	0.000287353	0	RAD23A	corneal stroma
ATRIP	5.7e-08	-0.268317	0.373	0.509	0.00111794	0	ATRIP	corneal stroma
GOLGA1	1.96e-08	-0.268408	0.342	0.488	0.00038439	0	GOLGA1	corneal stroma
CSPG5	1.26e-06	-0.268435	0.182	0.284	0.024715	0	CSPG5	corneal stroma
SLC25A39	3.07e-08	-0.268727	0.28	0.416	0.000601344	0	SLC25A39	corneal stroma
PPOX	0.000213818	-0.268925	0.58	0.634	1	0	PPOX	corneal stroma
HPS6	4.18e-08	-0.268972	0.184	0.316	0.000819826	0	HPS6	corneal stroma
ZBTB39	5.9e-08	-0.268986	0.155	0.272	0.00115757	0	ZBTB39	corneal stroma
NRL	8.1e-06	-0.269027	0.715	0.782	0.158828	0	NRL	corneal stroma
REPIN1	3.19e-07	-0.269041	0.184	0.299	0.00625329	0	REPIN1	corneal stroma
RP11-371E8.4	5.09e-05	-0.269055	0.514	0.608	0.997074	0	RP11-371E8.4	corneal stroma
WAPL	7.48e-06	-0.269167	0.41	0.52	0.14669	0	WAPL	corneal stroma
DDIT3	2.62e-05	-0.269244	0.543	0.636	0.514106	0	DDIT3	corneal stroma
APAF1	1.1e-05	-0.269264	0.479	0.578	0.214728	0	APAF1	corneal stroma
ZNF652	2.35e-07	-0.269618	0.381	0.5	0.00460393	0	ZNF652	corneal stroma
SOCS2	0.000991232	-0.269815	0.43	0.493	1	0	SOCS2	corneal stroma
AL513412.1	4.11e-06	-0.269883	0.627	0.729	0.0804873	0	AL513412.1	corneal stroma
ZFHX2	1.24e-06	-0.269912	0.322	0.45	0.0244089	0	ZFHX2	corneal stroma
ANP32B	0.000630166	-0.269999	0.486	0.553	1	0	ANP32B	corneal stroma
NFKBIZ	7.28e-05	-0.270035	0.339	0.438	1	0	NFKBIZ	corneal stroma
C17orf75	2.69e-07	-0.27044	0.312	0.436	0.00527075	0	C17orf75	corneal stroma
RGS14	6.04e-08	-0.270597	0.349	0.484	0.0011841	0	RGS14	corneal stroma
FGF22	1.03e-10	-0.270613	0.138	0.289	2.02e-06	0	FGF22	corneal stroma
MATR3	1.03e-07	-0.270655	0.44	0.565	0.00201258	0	MATR3	corneal stroma
MRPL34	2.53e-07	-0.270681	0.472	0.587	0.0049682	0	MRPL34	corneal stroma
YPEL3	8.41e-10	-0.270708	0.246	0.396	1.65e-05	0	YPEL3	corneal stroma
GPT2	1.78e-07	-0.270732	0.302	0.436	0.00348777	0	GPT2	corneal stroma
RNASET2	2.74e-08	-0.270897	0.243	0.371	0.000537051	0	RNASET2	corneal stroma
TAF5L	1.55e-06	-0.270942	0.29	0.413	0.030342	0	TAF5L	corneal stroma
HYAL2	6.64e-08	-0.271057	0.386	0.522	0.00130267	0	HYAL2	corneal stroma
HECTD4	9.97e-05	-0.271073	0.45	0.544	1	0	HECTD4	corneal stroma
SRRM4	0.0012894	-0.271155	0.206	0.271	1	0	SRRM4	corneal stroma
RP11-872D17.8	1.18e-06	-0.27132	0.071	0.159	0.023096	0	RP11-872D17.8	corneal stroma
NELFB	2.74e-08	-0.271346	0.265	0.409	0.000536599	0	NELFB	corneal stroma
GPRIN1	1.74e-08	-0.271493	0.179	0.311	0.000340829	0	GPRIN1	corneal stroma
VDAC2	2.2e-06	-0.271895	0.391	0.487	0.0431564	0	VDAC2	corneal stroma
GALNT2	1.8e-05	-0.272062	0.592	0.683	0.353395	0	GALNT2	corneal stroma
MGST3	4.01e-06	-0.272593	0.344	0.453	0.0786078	0	MGST3	corneal stroma
EXOC6	9.86e-07	-0.272622	0.329	0.448	0.0193309	0	EXOC6	corneal stroma
ABHD18	5.96e-09	-0.272653	0.3	0.438	0.000116811	0	ABHD18	corneal stroma
ZNF165	9.57e-05	-0.272776	0.221	0.307	1	0	ZNF165	corneal stroma
PDIK1L	1.52e-06	-0.273015	0.359	0.47	0.0298742	0	PDIK1L	corneal stroma
PTPRN	2.26e-07	-0.273079	0.31	0.441	0.00443266	0	PTPRN	corneal stroma
IPMK	0.000359644	-0.273108	0.504	0.583	1	0	IPMK	corneal stroma
ZBTB44	1.37e-05	-0.273246	0.361	0.464	0.268356	0	ZBTB44	corneal stroma
RGP1	1.31e-09	-0.273255	0.209	0.359	2.57e-05	0	RGP1	corneal stroma
ORAI1	4.64e-06	-0.273528	0.393	0.489	0.0909858	0	ORAI1	corneal stroma
LRRC8D	5.94e-06	-0.273639	0.342	0.454	0.116554	0	LRRC8D	corneal stroma
ADO	6.52e-08	-0.273991	0.258	0.387	0.00127932	0	ADO	corneal stroma
POU6F1	4.11e-07	-0.274334	0.206	0.325	0.00805782	0	POU6F1	corneal stroma
SCAND1	4.06e-07	-0.274351	0.396	0.502	0.00795964	0	SCAND1	corneal stroma
NCOA1	7.98e-06	-0.274385	0.575	0.663	0.156526	0	NCOA1	corneal stroma
RNF146	3.3e-08	-0.274642	0.211	0.343	0.000646058	0	RNF146	corneal stroma
NANP	1.25e-05	-0.274717	0.29	0.386	0.245201	0	NANP	corneal stroma
FAM49B	1.79e-07	-0.274826	0.457	0.581	0.0035084	0	FAM49B	corneal stroma
CENPT	6.99e-06	-0.274936	0.673	0.744	0.13709	0	CENPT	corneal stroma
PTGDS	7.55e-09	-0.275109	0.101	0.223	0.000147968	0	PTGDS	corneal stroma
SYNGR2	2.45e-12	-0.275405	0.088	0.244	4.8e-08	0	SYNGR2	corneal stroma
LBR	6.13e-05	-0.275411	0.45	0.529	1	0	LBR	corneal stroma
RAB11FIP4	1.97e-05	-0.275499	0.391	0.494	0.386902	0	RAB11FIP4	corneal stroma
FAM222A	8.24e-06	-0.275516	0.533	0.634	0.161562	0	FAM222A	corneal stroma
CISD1	0.000149779	-0.275541	0.467	0.557	1	0	CISD1	corneal stroma
GBAS	1.19e-05	-0.275596	0.349	0.443	0.233296	0	GBAS	corneal stroma
RP11-761B3.1	1.14e-06	-0.275709	0.595	0.679	0.0223835	0	RP11-761B3.1	corneal stroma
PIP4K2C	1.87e-12	-0.275856	0.076	0.229	3.66e-08	0	PIP4K2C	corneal stroma
KMT5A	5.74e-05	-0.276496	0.639	0.691	1	0	KMT5A	corneal stroma
POLD1	1.42e-07	-0.276607	0.396	0.52	0.00278139	0	POLD1	corneal stroma
QSOX2	1.57e-08	-0.276868	0.27	0.413	0.000307567	0	QSOX2	corneal stroma
GFI1B	6.24e-07	-0.277053	0.376	0.489	0.0122396	0	GFI1B	corneal stroma
SLC44A2	3.38e-09	-0.277218	0.305	0.453	6.62e-05	0	SLC44A2	corneal stroma
TPRG1L	1.94e-07	-0.277281	0.364	0.475	0.00379399	0	TPRG1L	corneal stroma
SH2D3C	1.93e-08	-0.277394	0.565	0.682	0.000379365	0	SH2D3C	corneal stroma
KCNH4	1.58e-09	-0.277565	0.108	0.236	3.1e-05	0	KCNH4	corneal stroma
DPP9	1.25e-06	-0.277758	0.425	0.532	0.0245958	0	DPP9	corneal stroma
DIRC2	5.56e-06	-0.277931	0.361	0.46	0.108988	0	DIRC2	corneal stroma
PLIN2	5.32e-05	-0.278116	0.256	0.343	1	0	PLIN2	corneal stroma
ZBTB18	2.66e-06	-0.278137	0.617	0.682	0.0522389	0	ZBTB18	corneal stroma
PURA	3.65e-05	-0.27818	0.403	0.487	0.714834	0	PURA	corneal stroma
CBX6	1.02e-06	-0.278284	0.398	0.515	0.0200847	0	CBX6	corneal stroma
SYNGAP1	1.66e-06	-0.278289	0.759	0.837	0.032468	0	SYNGAP1	corneal stroma
MEIG1	2.77e-09	-0.278589	0.26	0.403	5.43e-05	0	MEIG1	corneal stroma
ESCO1	9.87e-08	-0.278603	0.295	0.424	0.00193596	0	ESCO1	corneal stroma
KLF16	8.01e-06	-0.278643	0.678	0.731	0.157099	0	KLF16	corneal stroma
CDC42BPG	6.28e-09	-0.278645	0.128	0.254	0.000123201	0	CDC42BPG	corneal stroma
SPPL3	9.77e-07	-0.278652	0.369	0.481	0.0191618	0	SPPL3	corneal stroma
TSC22D2	0.000272823	-0.278764	0.59	0.647	1	0	TSC22D2	corneal stroma
ZNF131	0.000144627	-0.278883	0.703	0.757	1	0	ZNF131	corneal stroma
TUSC2	2.99e-07	-0.278915	0.511	0.617	0.00586316	0	TUSC2	corneal stroma
FTL	0.000261884	-0.279099	0.445	0.519	1	0	FTL	corneal stroma
NDUFS7	2.55e-07	-0.279421	0.307	0.429	0.00499877	0	NDUFS7	corneal stroma
RP11-514O12.4	1.73e-07	-0.279555	0.319	0.44	0.00339343	0	RP11-514O12.4	corneal stroma
PITX3	2.64e-09	-0.279753	0.305	0.461	5.17e-05	0	PITX3	corneal stroma
ADGRE3	1.3e-09	-0.279758	0.224	0.369	2.54e-05	0	ADGRE3	corneal stroma
C19orf38	4.69e-07	-0.280075	0.467	0.591	0.00919965	0	C19orf38	corneal stroma
DNAJB12	1.83e-06	-0.280203	0.43	0.546	0.0359432	0	DNAJB12	corneal stroma
BRF1	6.54e-05	-0.28024	0.688	0.757	1	0	BRF1	corneal stroma
RASSF7	4.04e-10	-0.280545	0.231	0.385	7.93e-06	0	RASSF7	corneal stroma
RP11-295K3.1	7.31e-10	-0.28059	0.162	0.309	1.43e-05	0	RP11-295K3.1	corneal stroma
GLB1L2	1.82e-09	-0.280606	0.204	0.349	3.56e-05	0	GLB1L2	corneal stroma
ATP6V0D1	9.41e-08	-0.281042	0.408	0.536	0.0018456	0	ATP6V0D1	corneal stroma
TMEM165	5.92e-05	-0.281124	0.371	0.452	1	0	TMEM165	corneal stroma
DYNLT1	8.64e-08	-0.281406	0.238	0.366	0.00169468	0	DYNLT1	corneal stroma
ZNF316	2.17e-08	-0.281558	0.152	0.279	0.000426137	0	ZNF316	corneal stroma
PUS1	7.53e-08	-0.281581	0.273	0.403	0.00147636	0	PUS1	corneal stroma
COMMD3-BMI1	0.000256436	-0.281709	0.445	0.519	1	0	COMMD3-BMI1	corneal stroma
C21orf58	0.000150624	-0.281879	0.585	0.649	1	0	C21orf58	corneal stroma
XPO7	8.05e-05	-0.282095	0.349	0.453	1	0	XPO7	corneal stroma
ST20	6e-08	-0.282403	0.229	0.352	0.00117655	0	ST20	corneal stroma
MIB2	2.32e-07	-0.282549	0.469	0.589	0.00455168	0	MIB2	corneal stroma
KEAP1	1.33e-07	-0.282579	0.243	0.362	0.00260902	0	KEAP1	corneal stroma
ELAVL1	6.43e-08	-0.282615	0.317	0.455	0.00126108	0	ELAVL1	corneal stroma
RAB14	2.48e-06	-0.282696	0.447	0.544	0.0485626	0	RAB14	corneal stroma
NEK8	5.76e-07	-0.282904	0.543	0.658	0.0113014	0	NEK8	corneal stroma
XIAP	3.97e-09	-0.282938	0.135	0.267	7.79e-05	0	XIAP	corneal stroma
RP11-73M18.2	3.53e-06	-0.282942	0.629	0.718	0.0692452	0	RP11-73M18.2	corneal stroma
TLCD1	7.95e-07	-0.283061	0.511	0.629	0.0155894	0	TLCD1	corneal stroma
GM2A	3.12e-06	-0.283084	0.472	0.576	0.0611054	0	GM2A	corneal stroma
RICTOR	1.15e-05	-0.283281	0.405	0.506	0.226265	0	RICTOR	corneal stroma
GCC1	0.000196554	-0.283532	0.425	0.5	1	0	GCC1	corneal stroma
ACTR5	2e-07	-0.283539	0.314	0.43	0.00392439	0	ACTR5	corneal stroma
MAST3	1.39e-06	-0.28368	0.371	0.484	0.0273492	0	MAST3	corneal stroma
KNDC1	2.8e-06	-0.283811	0.206	0.31	0.0548846	0	KNDC1	corneal stroma
WDR47	1.16e-08	-0.28387	0.26	0.409	0.000226583	0	WDR47	corneal stroma
LCORL	3.58e-06	-0.283993	0.585	0.687	0.0702448	0	LCORL	corneal stroma
RNF32	1.28e-07	-0.284405	0.214	0.34	0.00251114	0	RNF32	corneal stroma
KATNA1	1.82e-08	-0.284438	0.174	0.305	0.000356308	0	KATNA1	corneal stroma
CLCN3	1.46e-05	-0.28447	0.629	0.726	0.286228	0	CLCN3	corneal stroma
COPZ1	1.87e-07	-0.2845	0.506	0.626	0.00367253	0	COPZ1	corneal stroma
MCMBP	0.000107844	-0.284597	0.469	0.543	1	0	MCMBP	corneal stroma
ADD1	2.68e-07	-0.284617	0.447	0.562	0.00525575	0	ADD1	corneal stroma
H1FX	9.37e-08	-0.284982	0.292	0.423	0.00183761	0	H1FX	corneal stroma
PLD6	3.25e-07	-0.285007	0.133	0.239	0.00637916	0	PLD6	corneal stroma
BRI3	2.37e-09	-0.285034	0.447	0.594	4.64e-05	0	BRI3	corneal stroma
C5orf30	8.66e-06	-0.285183	0.359	0.469	0.169744	0	C5orf30	corneal stroma
ZNF653	3.22e-09	-0.285325	0.386	0.527	6.32e-05	0	ZNF653	corneal stroma
PLEKHA6	0.000166611	-0.285691	0.474	0.557	1	0	PLEKHA6	corneal stroma
CHD4	1.05e-05	-0.285949	0.386	0.49	0.205332	0	CHD4	corneal stroma
TPM1	6.85e-09	-0.286052	0.334	0.481	0.000134216	0	TPM1	corneal stroma
DNAJB6	3.35e-05	-0.286094	0.462	0.552	0.657032	0	DNAJB6	corneal stroma
ZDHHC12	1.84e-12	-0.286129	0.14	0.305	3.61e-08	0	ZDHHC12	corneal stroma
SPECC1	7.44e-08	-0.286287	0.6	0.706	0.00145832	0	SPECC1	corneal stroma
RP11-106M3.2	9.87e-06	-0.286316	0.43	0.523	0.193519	0	RP11-106M3.2	corneal stroma
NT5DC4	1.94e-09	-0.286601	0.069	0.188	3.81e-05	0	NT5DC4	corneal stroma
ANKRD12	2.1e-06	-0.286623	0.617	0.704	0.0412165	0	ANKRD12	corneal stroma
TMEM8A	6.49e-09	-0.286711	0.179	0.309	0.000127238	0	TMEM8A	corneal stroma
LRP10	5.37e-07	-0.287276	0.265	0.382	0.0105219	0	LRP10	corneal stroma
YWHAH	1.09e-07	-0.287334	0.413	0.55	0.0021364	0	YWHAH	corneal stroma
ABCG1	2.16e-05	-0.287443	0.3	0.388	0.424237	0	ABCG1	corneal stroma
PCBD2	1e-07	-0.287803	0.337	0.465	0.00196401	0	PCBD2	corneal stroma
ARF1	5.61e-07	-0.287806	0.428	0.545	0.0109965	0	ARF1	corneal stroma
BPHL	1.05e-07	-0.287867	0.423	0.556	0.00206001	0	BPHL	corneal stroma
SLC35E4	1.94e-06	-0.28795	0.44	0.536	0.038012	0	SLC35E4	corneal stroma
RNF220	3.88e-05	-0.288047	0.585	0.66	0.760845	0	RNF220	corneal stroma
CALM2	2.59e-07	-0.288064	0.489	0.601	0.00507586	0	CALM2	corneal stroma
CFAP99	2.86e-07	-0.288149	0.378	0.504	0.00560741	0	CFAP99	corneal stroma
PCID2	3.51e-06	-0.28869	0.41	0.526	0.0688154	0	PCID2	corneal stroma
ABCB6	1.11e-07	-0.288899	0.432	0.541	0.00217152	0	ABCB6	corneal stroma
PC	4.25e-06	-0.289148	0.698	0.75	0.0832405	0	PC	corneal stroma
APRT	1.28e-07	-0.289293	0.307	0.439	0.00250574	0	APRT	corneal stroma
FGFRL1	9.86e-05	-0.289342	0.459	0.538	1	0	FGFRL1	corneal stroma
BSG	5.5e-08	-0.289343	0.388	0.509	0.00107785	0	BSG	corneal stroma
CBLN1	7.48e-07	-0.289718	0.177	0.282	0.0146746	0	CBLN1	corneal stroma
ATF5	6.5e-09	-0.289722	0.332	0.48	0.00012743	0	ATF5	corneal stroma
ZNF511	1.93e-06	-0.289726	0.312	0.42	0.0378068	0	ZNF511	corneal stroma
ACACA	6.84e-07	-0.289803	0.602	0.69	0.0134021	0	ACACA	corneal stroma
TRIM8	2.4e-07	-0.289849	0.445	0.578	0.00470343	0	TRIM8	corneal stroma
VEGFB	3.52e-08	-0.290556	0.17	0.291	0.000689889	0	VEGFB	corneal stroma
ABCC5	8.62e-06	-0.290558	0.393	0.492	0.168919	0	ABCC5	corneal stroma
GKAP1	4.3e-10	-0.290727	0.179	0.331	8.44e-06	0	GKAP1	corneal stroma
ADIPOR1	9.45e-07	-0.290904	0.305	0.417	0.0185246	0	ADIPOR1	corneal stroma
UNC45A	0.000115902	-0.290995	0.42	0.495	1	0	UNC45A	corneal stroma
RUFY3	8.03e-07	-0.291083	0.403	0.512	0.0157524	0	RUFY3	corneal stroma
KCTD6	2.51e-07	-0.291106	0.369	0.484	0.0049302	0	KCTD6	corneal stroma
C9orf69	1.22e-05	-0.291296	0.366	0.461	0.240087	0	C9orf69	corneal stroma
RP11-552F3.12	5.3e-09	-0.291406	0.319	0.46	0.000103821	0	RP11-552F3.12	corneal stroma
IKZF1	3.25e-05	-0.291499	0.182	0.268	0.636278	0	IKZF1	corneal stroma
BCL2L11	5.25e-08	-0.291604	0.45	0.582	0.00102983	0	BCL2L11	corneal stroma
ATP5S	1.09e-08	-0.291792	0.415	0.559	0.000213195	0	ATP5S	corneal stroma
WTAP	9.8e-08	-0.291833	0.459	0.582	0.00192213	0	WTAP	corneal stroma
PFN1	4.5e-06	-0.291905	0.462	0.567	0.0882551	0	PFN1	corneal stroma
DENND4C	5.42e-06	-0.292162	0.464	0.566	0.106344	0	DENND4C	corneal stroma
RP11-20I23.1	1.63e-06	-0.292178	0.506	0.606	0.0320568	0	RP11-20I23.1	corneal stroma
DENND6A	9.21e-09	-0.292245	0.224	0.366	0.000180617	0	DENND6A	corneal stroma
ACTB	1.24e-05	-0.29243	0.757	0.798	0.24238	0	ACTB	corneal stroma
ARV1	1.31e-08	-0.292497	0.349	0.488	0.000256207	0	ARV1	corneal stroma
MYL12A	4.92e-08	-0.292751	0.324	0.461	0.000964885	0	MYL12A	corneal stroma
THEGL	3.45e-11	-0.293091	0.192	0.353	6.77e-07	0	THEGL	corneal stroma
LMBR1	1.93e-06	-0.29358	0.486	0.587	0.037876	0	LMBR1	corneal stroma
BAZ2A	0.000107736	-0.293715	0.688	0.736	1	0	BAZ2A	corneal stroma
MKLN1	0.00596422	-0.293778	0.553	0.606	1	0	MKLN1	corneal stroma
RAD21L1	4.02e-09	-0.293924	0.268	0.407	7.88e-05	0	RAD21L1	corneal stroma
HPS4	3.19e-08	-0.294077	0.312	0.438	0.000625657	0	HPS4	corneal stroma
CTSD	4.39e-12	-0.294121	0.101	0.251	8.6e-08	0	CTSD	corneal stroma
RHOF	4.66e-06	-0.294172	0.725	0.768	0.0914602	0	RHOF	corneal stroma
ZFAND6	8.01e-07	-0.294217	0.464	0.568	0.0157071	0	ZFAND6	corneal stroma
RAC1	2.22e-07	-0.294241	0.45	0.562	0.00436079	0	RAC1	corneal stroma
CCDC94	2e-08	-0.294755	0.381	0.525	0.000392308	0	CCDC94	corneal stroma
DENND3	2.26e-05	-0.294759	0.428	0.511	0.443276	0	DENND3	corneal stroma
RCL1	7.53e-06	-0.294814	0.514	0.613	0.14757	0	RCL1	corneal stroma
MAP3K1	1.91e-06	-0.294872	0.322	0.436	0.0373597	0	MAP3K1	corneal stroma
UBE2F-SCLY	0.000453765	-0.294897	0.673	0.716	1	0	UBE2F-SCLY	corneal stroma
SLC12A6	1.3e-07	-0.295635	0.305	0.431	0.00255705	0	SLC12A6	corneal stroma
TPRN	5.39e-09	-0.295684	0.42	0.575	0.000105592	0	TPRN	corneal stroma
PXMP4	7.92e-05	-0.295774	0.285	0.366	1	0	PXMP4	corneal stroma
CCNJL	1.11e-05	-0.296182	0.312	0.418	0.217593	0	CCNJL	corneal stroma
PBX3	5.87e-07	-0.296186	0.545	0.64	0.0115026	0	PBX3	corneal stroma
EPB41L4A	8.52e-05	-0.296244	0.501	0.583	1	0	EPB41L4A	corneal stroma
GATAD2A	1.07e-07	-0.29678	0.799	0.846	0.00209343	0	GATAD2A	corneal stroma
CAPRIN1	1.92e-06	-0.296964	0.459	0.569	0.0376783	0	CAPRIN1	corneal stroma
MAN2B1	2.85e-08	-0.297047	0.192	0.318	0.000558056	0	MAN2B1	corneal stroma
AAAS	6.1e-09	-0.297048	0.42	0.569	0.000119593	0	AAAS	corneal stroma
PXT1	1.8e-08	-0.297123	0.405	0.542	0.000353638	0	PXT1	corneal stroma
SGK1	2.24e-05	-0.297461	0.484	0.583	0.438603	0	SGK1	corneal stroma
TMEM251	9.23e-08	-0.2975	0.26	0.381	0.00180937	0	TMEM251	corneal stroma
PITPNM1	9.31e-09	-0.297638	0.292	0.43	0.000182595	0	PITPNM1	corneal stroma
GCK	1.22e-08	-0.2978	0.221	0.358	0.000238914	0	GCK	corneal stroma
MLF2	1.2e-08	-0.297923	0.737	0.809	0.000235764	0	MLF2	corneal stroma
URB2	1.63e-07	-0.297986	0.287	0.419	0.00319261	0	URB2	corneal stroma
SEZ6L2	7.15e-09	-0.298706	0.211	0.346	0.000140136	0	SEZ6L2	corneal stroma
PITX1	3.64e-10	-0.299101	0.12	0.258	7.14e-06	0	PITX1	corneal stroma
MOAP1	7.28e-08	-0.29932	0.26	0.382	0.00142692	0	MOAP1	corneal stroma
ADAMTSL5	8.84e-09	-0.299576	0.265	0.398	0.000173334	0	ADAMTSL5	corneal stroma
TMEM178B	0.00880864	-0.29983	0.332	0.381	1	0	TMEM178B	corneal stroma
LRRC14	4.59e-08	-0.300066	0.408	0.553	0.0008997	0	LRRC14	corneal stroma
SH3GLB2	1.08e-08	-0.30008	0.415	0.557	0.0002122	0	SH3GLB2	corneal stroma
ELOVL1	8.24e-11	-0.300196	0.209	0.367	1.62e-06	0	ELOVL1	corneal stroma
PTPN18	1.08e-07	-0.300266	0.246	0.367	0.00212525	0	PTPN18	corneal stroma
PTEN	2.63e-05	-0.300616	0.491	0.586	0.514797	0	PTEN	corneal stroma
UBN1	2.51e-07	-0.300927	0.378	0.492	0.00492087	0	UBN1	corneal stroma
ODC1	7.74e-08	-0.301187	0.41	0.541	0.00151687	0	ODC1	corneal stroma
ZNF771	4.03e-07	-0.30128	0.604	0.693	0.00790077	0	ZNF771	corneal stroma
VSIG10L	2.08e-09	-0.30138	0.344	0.503	4.08e-05	0	VSIG10L	corneal stroma
BRD3	3.94e-09	-0.301958	0.425	0.562	7.72e-05	0	BRD3	corneal stroma
SLBP	1.1e-07	-0.301996	0.388	0.519	0.00215095	0	SLBP	corneal stroma
DCUN1D2	5.35e-08	-0.302069	0.369	0.494	0.00104952	0	DCUN1D2	corneal stroma
FKBP4	1.09e-07	-0.30228	0.324	0.451	0.00213198	0	FKBP4	corneal stroma
CDK2AP2	3.25e-11	-0.302342	0.263	0.44	6.38e-07	0	CDK2AP2	corneal stroma
CDV3	5.45e-08	-0.302462	0.572	0.681	0.00106833	0	CDV3	corneal stroma
ELF2	2.93e-07	-0.30257	0.744	0.826	0.00574282	0	ELF2	corneal stroma
MMS19	2.16e-07	-0.302742	0.528	0.638	0.00422654	0	MMS19	corneal stroma
CHFR	2.42e-05	-0.302797	0.72	0.777	0.473599	0	CHFR	corneal stroma
MATN1	8.19e-09	-0.302852	0.602	0.729	0.000160625	0	MATN1	corneal stroma
CUL4A	1.31e-06	-0.302948	0.435	0.553	0.0257769	0	CUL4A	corneal stroma
DNAJB2	2.27e-05	-0.303025	0.506	0.576	0.445949	0	DNAJB2	corneal stroma
ARL4A	4.81e-08	-0.30306	0.371	0.498	0.00094241	0	ARL4A	corneal stroma
SLC3A2	3.13e-07	-0.303151	0.6	0.689	0.0061361	0	SLC3A2	corneal stroma
MSL2	8.95e-07	-0.30357	0.604	0.705	0.0175508	0	MSL2	corneal stroma
ZNF783	5.37e-07	-0.304089	0.393	0.498	0.0105326	0	ZNF783	corneal stroma
ANKRD13D	1.05e-08	-0.304232	0.369	0.494	0.000205709	0	ANKRD13D	corneal stroma
PCK2	1.46e-09	-0.304298	0.206	0.352	2.86e-05	0	PCK2	corneal stroma
WDR59	6.75e-07	-0.304355	0.496	0.615	0.0132372	0	WDR59	corneal stroma
HPD	1.39e-11	-0.304746	0.194	0.354	2.72e-07	0	HPD	corneal stroma
UROS	1.55e-09	-0.304817	0.206	0.35	3.03e-05	0	UROS	corneal stroma
LAGE3	5.12e-14	-0.304859	0.13	0.312	1e-09	0	LAGE3	corneal stroma
PUSL1	1.54e-08	-0.304915	0.423	0.557	0.000302273	0	PUSL1	corneal stroma
CITED2	3.97e-07	-0.305046	0.391	0.524	0.00777562	0	CITED2	corneal stroma
RAB2A	7.33e-08	-0.305125	0.474	0.591	0.00143664	0	RAB2A	corneal stroma
FAM193B	1.94e-11	-0.30521	0.214	0.379	3.81e-07	0	FAM193B	corneal stroma
PDDC1	1.54e-09	-0.305869	0.229	0.37	3.02e-05	0	PDDC1	corneal stroma
APIP	2.42e-10	-0.305931	0.403	0.55	4.74e-06	0	APIP	corneal stroma
RNF139	4.97e-07	-0.306269	0.44	0.55	0.00974231	0	RNF139	corneal stroma
NADK	8.28e-06	-0.306341	0.307	0.411	0.162444	0	NADK	corneal stroma
ENO3	1.17e-06	-0.306649	0.469	0.579	0.0230365	0	ENO3	corneal stroma
DUSP28	3.08e-08	-0.306696	0.43	0.574	0.000602994	0	DUSP28	corneal stroma
MBD6	1.1e-05	-0.306716	0.663	0.739	0.216126	0	MBD6	corneal stroma
MAPK8IP1	1.85e-08	-0.306979	0.44	0.563	0.000362059	0	MAPK8IP1	corneal stroma
SCRN1	4.33e-09	-0.307065	0.209	0.344	8.5e-05	0	SCRN1	corneal stroma
SYDE2	4.37e-09	-0.307207	0.226	0.368	8.57e-05	0	SYDE2	corneal stroma
FZD4	6.19e-10	-0.307309	0.273	0.432	1.21e-05	0	FZD4	corneal stroma
ZNF273	1.63e-07	-0.307493	0.275	0.404	0.00320201	0	ZNF273	corneal stroma
DYNLL2	7.88e-10	-0.307612	0.317	0.464	1.54e-05	0	DYNLL2	corneal stroma
RP11-566K11.2	0.00280241	-0.307947	0.457	0.525	1	0	RP11-566K11.2	corneal stroma
MELTF	1.19e-05	-0.308016	0.369	0.481	0.233265	0	MELTF	corneal stroma
HES6	1.57e-09	-0.30815	0.275	0.414	3.08e-05	0	HES6	corneal stroma
KLHDC4	5.18e-09	-0.308308	0.206	0.344	0.000101517	0	KLHDC4	corneal stroma
SH2D3A	1.61e-10	-0.308364	0.081	0.211	3.15e-06	0	SH2D3A	corneal stroma
FAM177A1	5.59e-11	-0.3086	0.346	0.513	1.1e-06	0	FAM177A1	corneal stroma
TMEM50A	2.85e-10	-0.3087	0.189	0.336	5.58e-06	0	TMEM50A	corneal stroma
TEPP	2.29e-12	-0.308769	0.13	0.296	4.49e-08	0	TEPP	corneal stroma
HACD1	1.71e-09	-0.308779	0.13	0.262	3.34e-05	0	HACD1	corneal stroma
UBTD1	2.38e-08	-0.308953	0.58	0.701	0.000466821	0	UBTD1	corneal stroma
RAB3IL1	3.22e-09	-0.309151	0.26	0.406	6.31e-05	0	RAB3IL1	corneal stroma
ARIH2OS	1.79e-10	-0.309476	0.219	0.371	3.51e-06	0	ARIH2OS	corneal stroma
LNPEP	1.1e-06	-0.309482	0.516	0.62	0.0214741	0	LNPEP	corneal stroma
SPIRE2	2.83e-08	-0.309728	0.45	0.584	0.000555626	0	SPIRE2	corneal stroma
ULK1	3.7e-06	-0.309769	0.479	0.575	0.0725309	0	ULK1	corneal stroma
DVL1	8.41e-08	-0.310033	0.339	0.469	0.0016492	0	DVL1	corneal stroma
MXD3	1.35e-08	-0.310526	0.447	0.577	0.000264038	0	MXD3	corneal stroma
NANOS1	7.76e-09	-0.310632	0.273	0.42	0.000152105	0	NANOS1	corneal stroma
ZSCAN31	9.53e-08	-0.31084	0.388	0.526	0.00186819	0	ZSCAN31	corneal stroma
TESK2	1.72e-09	-0.310956	0.388	0.537	3.37e-05	0	TESK2	corneal stroma
GMPS	3.88e-08	-0.31123	0.484	0.616	0.000760717	0	GMPS	corneal stroma
NAGLU	9.92e-11	-0.311385	0.211	0.366	1.94e-06	0	NAGLU	corneal stroma
OTUD1	1.18e-08	-0.311602	0.356	0.488	0.000232006	0	OTUD1	corneal stroma
ARMC7	8.79e-11	-0.311865	0.182	0.337	1.72e-06	0	ARMC7	corneal stroma
NGLY1	3.94e-11	-0.312291	0.295	0.454	7.73e-07	0	NGLY1	corneal stroma
PI4KA	3.62e-08	-0.312301	0.479	0.605	0.000710093	0	PI4KA	corneal stroma
RIIAD1	4.43e-09	-0.312441	0.177	0.314	8.68e-05	0	RIIAD1	corneal stroma
VEZF1	6.3e-05	-0.313009	0.403	0.477	1	0	VEZF1	corneal stroma
IKBIP	1.18e-08	-0.313143	0.413	0.549	0.000231721	0	IKBIP	corneal stroma
LMTK3	0.00439143	-0.313347	0.486	0.517	1	0	LMTK3	corneal stroma
PRR5	2.41e-06	-0.313448	0.568	0.629	0.0472934	0	PRR5	corneal stroma
HSF1	8.73e-08	-0.313594	0.405	0.535	0.00171122	0	HSF1	corneal stroma
STX1A	1.87e-07	-0.313637	0.386	0.503	0.00367334	0	STX1A	corneal stroma
RABIF	6.8e-09	-0.313764	0.324	0.454	0.000133351	0	RABIF	corneal stroma
WIZ	1.64e-07	-0.313897	0.376	0.494	0.00321859	0	WIZ	corneal stroma
CDS2	3.87e-09	-0.314426	0.459	0.591	7.58e-05	0	CDS2	corneal stroma
MPP1	4.39e-10	-0.314536	0.14	0.279	8.61e-06	0	MPP1	corneal stroma
ABHD8	2.63e-08	-0.314738	0.622	0.709	0.000516036	0	ABHD8	corneal stroma
FBXL12	3.23e-09	-0.314796	0.582	0.694	6.32e-05	0	FBXL12	corneal stroma
LONRF3	7.02e-07	-0.314946	0.125	0.226	0.0137579	0	LONRF3	corneal stroma
LSS	1.08e-10	-0.315053	0.393	0.561	2.12e-06	0	LSS	corneal stroma
MOB3C	3.4e-10	-0.315154	0.106	0.241	6.67e-06	0	MOB3C	corneal stroma
MRPL38	2.04e-11	-0.315339	0.256	0.422	4.01e-07	0	MRPL38	corneal stroma
CDH15	7.09e-08	-0.315397	0.373	0.497	0.00139097	0	CDH15	corneal stroma
KCNN4	1.2e-11	-0.315405	0.111	0.264	2.35e-07	0	KCNN4	corneal stroma
GLUL	2.08e-07	-0.316135	0.292	0.418	0.00407441	0	GLUL	corneal stroma
ANKRD10	4.91e-09	-0.316446	0.553	0.677	9.63e-05	0	ANKRD10	corneal stroma
FGFR4	4.33e-12	-0.316836	0.182	0.35	8.49e-08	0	FGFR4	corneal stroma
SF3B6	3.2e-06	-0.317037	0.472	0.557	0.0627724	0	SF3B6	corneal stroma
DDB2	3.68e-08	-0.317102	0.229	0.35	0.000721839	0	DDB2	corneal stroma
CERS2	7.68e-08	-0.317228	0.273	0.404	0.00150512	0	CERS2	corneal stroma
DFFB	9.6e-09	-0.317276	0.216	0.355	0.000188236	0	DFFB	corneal stroma
GNB2	1.96e-06	-0.317385	0.57	0.652	0.0383855	0	GNB2	corneal stroma
STK17B	1.35e-08	-0.317407	0.283	0.422	0.000264552	0	STK17B	corneal stroma
ZFP36L2	3.16e-05	-0.317416	0.585	0.65	0.619596	0	ZFP36L2	corneal stroma
AIM1L	2.24e-12	-0.317491	0.086	0.234	4.39e-08	0	AIM1L	corneal stroma
MAN1A1	0.000226036	-0.318306	0.597	0.66	1	0	MAN1A1	corneal stroma
CDK9	5.62e-09	-0.318507	0.42	0.549	0.000110206	0	CDK9	corneal stroma
ABCA3	1.46e-08	-0.318695	0.314	0.446	0.000285705	0	ABCA3	corneal stroma
ARFRP1	1.99e-11	-0.318778	0.189	0.349	3.9e-07	0	ARFRP1	corneal stroma
USF2	4.22e-08	-0.319101	0.349	0.476	0.000827987	0	USF2	corneal stroma
C1orf35	2.4e-07	-0.319214	0.292	0.415	0.00469992	0	C1orf35	corneal stroma
PISD	8.22e-07	-0.319329	0.415	0.524	0.0161116	0	PISD	corneal stroma
VPS37A	1.51e-07	-0.319698	0.396	0.531	0.0029528	0	VPS37A	corneal stroma
ZNF696	2.08e-11	-0.319915	0.197	0.36	4.07e-07	0	ZNF696	corneal stroma
ZNF592	2.18e-07	-0.320278	0.349	0.457	0.00427648	0	ZNF592	corneal stroma
GNG5	4.89e-08	-0.320491	0.388	0.516	0.000957848	0	GNG5	corneal stroma
NCOA6	1.08e-05	-0.32078	0.673	0.729	0.211742	0	NCOA6	corneal stroma
HPCAL1	4.4e-06	-0.320939	0.462	0.553	0.0862096	0	HPCAL1	corneal stroma
NHLRC4	1.92e-13	-0.320957	0.044	0.191	3.76e-09	0	NHLRC4	corneal stroma
TM7SF2	9.86e-12	-0.320959	0.221	0.394	1.93e-07	0	TM7SF2	corneal stroma
ZNF250	2.72e-07	-0.321094	0.41	0.538	0.00532936	0	ZNF250	corneal stroma
FUT11	8.09e-08	-0.321146	0.285	0.405	0.00158586	0	FUT11	corneal stroma
CMTR1	2.59e-08	-0.322196	0.248	0.383	0.000507913	0	CMTR1	corneal stroma
ING5	8.17e-07	-0.322232	0.673	0.741	0.0160248	0	ING5	corneal stroma
MON1A	1.12e-13	-0.322417	0.143	0.316	2.19e-09	0	MON1A	corneal stroma
FTH1	2.38e-07	-0.322441	0.391	0.516	0.00466795	0	FTH1	corneal stroma
TUBB3	0.000506783	-0.322593	0.43	0.512	1	0	TUBB3	corneal stroma
TBL1XR1	2.01e-07	-0.322853	0.548	0.656	0.00393236	0	TBL1XR1	corneal stroma
PLEKHF2	3.67e-10	-0.322955	0.283	0.444	7.19e-06	0	PLEKHF2	corneal stroma
YPEL4	3.27e-10	-0.323049	0.209	0.361	6.42e-06	0	YPEL4	corneal stroma
SLC1A5	0.000100588	-0.323326	0.356	0.435	1	0	SLC1A5	corneal stroma
MAT2A	8.11e-08	-0.323509	0.474	0.593	0.00159042	0	MAT2A	corneal stroma
ST20-MTHFS	2.67e-08	-0.323556	0.364	0.489	0.00052413	0	ST20-MTHFS	corneal stroma
TRIM11	3.16e-14	-0.324096	0.204	0.384	6.2e-10	0	TRIM11	corneal stroma
AGTPBP1	1.95e-06	-0.324317	0.477	0.572	0.0382885	0	AGTPBP1	corneal stroma
APEH	5.14e-09	-0.324544	0.361	0.509	0.000100684	0	APEH	corneal stroma
GATA5	1.16e-11	-0.324858	0.057	0.191	2.28e-07	0	GATA5	corneal stroma
CELF3	1.11e-11	-0.324955	0.128	0.284	2.18e-07	0	CELF3	corneal stroma
ADNP	1.38e-08	-0.325033	0.469	0.585	0.000270989	0	ADNP	corneal stroma
ADAM15	3.24e-09	-0.325171	0.283	0.425	6.35e-05	0	ADAM15	corneal stroma
STX2	2.42e-08	-0.325438	0.305	0.438	0.000474679	0	STX2	corneal stroma
TMED1	8.92e-09	-0.325511	0.403	0.538	0.000174849	0	TMED1	corneal stroma
LCN12	1.08e-12	-0.325545	0.157	0.332	2.12e-08	0	LCN12	corneal stroma
STK11	1.68e-07	-0.325793	0.558	0.655	0.00328742	0	STK11	corneal stroma
UBTF	1.08e-07	-0.326008	0.619	0.721	0.00211547	0	UBTF	corneal stroma
STON2	3.3e-10	-0.326401	0.398	0.534	6.48e-06	0	STON2	corneal stroma
USP25	5.04e-11	-0.32659	0.292	0.463	9.88e-07	0	USP25	corneal stroma
NDUFS6	6.37e-11	-0.326598	0.177	0.331	1.25e-06	0	NDUFS6	corneal stroma
HNRNPF	1.82e-05	-0.326952	0.668	0.732	0.356934	0	HNRNPF	corneal stroma
UCKL1	9.02e-08	-0.32751	0.413	0.521	0.00176805	0	UCKL1	corneal stroma
CFLAR	9.71e-06	-0.328222	0.324	0.416	0.190402	0	CFLAR	corneal stroma
SNAI3	4.83e-12	-0.328314	0.13	0.294	9.47e-08	0	SNAI3	corneal stroma
PSMG1	5.48e-08	-0.328655	0.359	0.478	0.00107488	0	PSMG1	corneal stroma
PTMS	1.42e-09	-0.32881	0.563	0.684	2.78e-05	0	PTMS	corneal stroma
C1orf145	2.18e-10	-0.329159	0.233	0.389	4.28e-06	0	C1orf145	corneal stroma
ARHGAP45	1.21e-07	-0.329296	0.192	0.306	0.00237784	0	ARHGAP45	corneal stroma
TUBGCP2	5.54e-08	-0.329682	0.354	0.481	0.0010867	0	TUBGCP2	corneal stroma
BCL2L1	6.83e-06	-0.329848	0.518	0.596	0.134	0	BCL2L1	corneal stroma
ELF1	3.32e-07	-0.329891	0.568	0.662	0.00651396	0	ELF1	corneal stroma
SNTA1	4.21e-10	-0.330297	0.209	0.354	8.25e-06	0	SNTA1	corneal stroma
RP11-214K3.25	1.3e-09	-0.330413	0.518	0.657	2.55e-05	0	RP11-214K3.25	corneal stroma
ZFAND4	2.96e-11	-0.330456	0.253	0.425	5.8e-07	0	ZFAND4	corneal stroma
ISCA1	2.48e-08	-0.330467	0.359	0.49	0.000487074	0	ISCA1	corneal stroma
PCDH1	5.08e-08	-0.330485	0.194	0.32	0.000995773	0	PCDH1	corneal stroma
MINK1	1.92e-10	-0.330906	0.356	0.507	3.77e-06	0	MINK1	corneal stroma
XKR4	0.000333518	-0.331126	0.391	0.448	1	0	XKR4	corneal stroma
HIRA	8.74e-07	-0.331238	0.563	0.651	0.0171423	0	HIRA	corneal stroma
IBA57	3.43e-07	-0.331364	0.617	0.708	0.00672269	0	IBA57	corneal stroma
RTBDN	1.54e-12	-0.331423	0.108	0.264	3.01e-08	0	RTBDN	corneal stroma
SAC3D1	8.6e-10	-0.331426	0.278	0.422	1.69e-05	0	SAC3D1	corneal stroma
MAP1LC3B	1.05e-07	-0.331472	0.683	0.757	0.00205738	0	MAP1LC3B	corneal stroma
C8orf82	6.69e-08	-0.33164	0.29	0.413	0.00131164	0	C8orf82	corneal stroma
TUFT1	1.22e-10	-0.332231	0.251	0.404	2.39e-06	0	TUFT1	corneal stroma
NOXA1	4.71e-12	-0.33231	0.189	0.354	9.23e-08	0	NOXA1	corneal stroma
C22orf39	5.87e-07	-0.332452	0.558	0.648	0.0115036	0	C22orf39	corneal stroma
OXSM	1.44e-11	-0.332727	0.256	0.422	2.82e-07	0	OXSM	corneal stroma
ZCCHC2	8.82e-09	-0.333052	0.619	0.738	0.000172953	0	ZCCHC2	corneal stroma
CECR2	3.13e-06	-0.333689	0.354	0.448	0.0613726	0	CECR2	corneal stroma
YBX2	2.54e-14	-0.333695	0.111	0.285	4.98e-10	0	YBX2	corneal stroma
GCLM	2.45e-09	-0.333711	0.265	0.406	4.81e-05	0	GCLM	corneal stroma
AMFR	1.66e-10	-0.333799	0.224	0.378	3.26e-06	0	AMFR	corneal stroma
GADD45G	5.03e-09	-0.334157	0.238	0.387	9.86e-05	0	GADD45G	corneal stroma
TPPP2	6.9e-07	-0.334511	0.189	0.302	0.0135309	0	TPPP2	corneal stroma
ADCK1	2.05e-10	-0.334678	0.219	0.38	4.02e-06	0	ADCK1	corneal stroma
NUDT16	2.86e-14	-0.33508	0.199	0.391	5.61e-10	0	NUDT16	corneal stroma
TGFB1	1.46e-05	-0.335349	0.511	0.594	0.285434	0	TGFB1	corneal stroma
LAMP1	3.07e-07	-0.335668	0.26	0.376	0.00601003	0	LAMP1	corneal stroma
S100A2	2.12e-08	-0.336449	0.165	0.287	0.000415644	0	S100A2	corneal stroma
FAM228B	1.31e-07	-0.336636	0.69	0.755	0.00255978	0	FAM228B	corneal stroma
MRPL41	1.02e-10	-0.336666	0.241	0.397	2.01e-06	0	MRPL41	corneal stroma
KCNC3	9.51e-10	-0.337415	0.631	0.739	1.86e-05	0	KCNC3	corneal stroma
DPF3	3.03e-06	-0.338261	0.452	0.553	0.0593423	0	DPF3	corneal stroma
TSPAN13	1.25e-11	-0.338408	0.13	0.285	2.44e-07	0	TSPAN13	corneal stroma
ZNF487	1.34e-10	-0.339035	0.42	0.56	2.64e-06	0	ZNF487	corneal stroma
DENND4B	1.52e-13	-0.339078	0.214	0.405	2.98e-09	0	DENND4B	corneal stroma
APC2	1.25e-06	-0.339208	0.418	0.503	0.024536	0	APC2	corneal stroma
SLC45A3	1.46e-08	-0.33948	0.238	0.369	0.000286356	0	SLC45A3	corneal stroma
RASIP1	1.61e-10	-0.339525	0.536	0.677	3.15e-06	0	RASIP1	corneal stroma
CTCF	8.76e-08	-0.339758	0.59	0.688	0.00171765	0	CTCF	corneal stroma
RIMS3	9.65e-14	-0.339983	0.172	0.357	1.89e-09	0	RIMS3	corneal stroma
PIM2	9.08e-13	-0.340346	0.189	0.362	1.78e-08	0	PIM2	corneal stroma
PPP3CB	7.99e-10	-0.341209	0.285	0.429	1.57e-05	0	PPP3CB	corneal stroma
TOB1	3.58e-10	-0.341248	0.499	0.651	7.02e-06	0	TOB1	corneal stroma
ANKRD18B	2.58e-14	-0.341645	0.081	0.253	5.06e-10	0	ANKRD18B	corneal stroma
PER3	4.58e-12	-0.341802	0.391	0.56	8.99e-08	0	PER3	corneal stroma
TRIB3	2.16e-09	-0.341997	0.162	0.302	4.23e-05	0	TRIB3	corneal stroma
PLLP	6.43e-10	-0.342188	0.143	0.28	1.26e-05	0	PLLP	corneal stroma
SMIM12	5.41e-10	-0.342238	0.285	0.436	1.06e-05	0	SMIM12	corneal stroma
CPOX	7.18e-07	-0.342908	0.506	0.608	0.0140876	0	CPOX	corneal stroma
WNT3A	5.16e-08	-0.344031	0.152	0.272	0.00101092	0	WNT3A	corneal stroma
PQLC1	6.61e-06	-0.344032	0.369	0.475	0.129583	0	PQLC1	corneal stroma
L2HGDH	6.73e-12	-0.344858	0.349	0.537	1.32e-07	0	L2HGDH	corneal stroma
LRRFIP2	1.12e-07	-0.344862	0.312	0.429	0.00219734	0	LRRFIP2	corneal stroma
SLC35F5	2.13e-11	-0.344986	0.278	0.438	4.18e-07	0	SLC35F5	corneal stroma
CDKN2C	1.13e-08	-0.345034	0.391	0.527	0.0002209	0	CDKN2C	corneal stroma
FBXL15	1.48e-10	-0.345631	0.366	0.52	2.9e-06	0	FBXL15	corneal stroma
MLXIP	1.18e-10	-0.345797	0.428	0.569	2.31e-06	0	MLXIP	corneal stroma
LLfos-48D6.2	8.77e-10	-0.345871	0.668	0.756	1.72e-05	0	LLfos-48D6.2	corneal stroma
LMF1	2.97e-08	-0.34607	0.511	0.618	0.00058269	0	LMF1	corneal stroma
CYB5R1	3.44e-12	-0.346141	0.226	0.395	6.74e-08	0	CYB5R1	corneal stroma
VARS	2.43e-12	-0.3464	0.241	0.409	4.77e-08	0	VARS	corneal stroma
ARPC1B	1.81e-09	-0.346462	0.337	0.479	3.54e-05	0	ARPC1B	corneal stroma
PURG	1.34e-09	-0.346879	0.396	0.534	2.64e-05	0	PURG	corneal stroma
C11orf21	5.84e-10	-0.346885	0.084	0.209	1.14e-05	0	C11orf21	corneal stroma
C5orf45	0.000233421	-0.346989	0.413	0.489	1	0	C5orf45	corneal stroma
CPAMD8	2.34e-07	-0.347419	0.369	0.481	0.00457911	0	CPAMD8	corneal stroma
ZNF217	3.12e-10	-0.347562	0.428	0.564	6.12e-06	0	ZNF217	corneal stroma
FBXO7	1.14e-10	-0.347729	0.199	0.351	2.24e-06	0	FBXO7	corneal stroma
MAP3K9	4.69e-11	-0.348436	0.214	0.368	9.2e-07	0	MAP3K9	corneal stroma
MRPL36	4.05e-12	-0.349114	0.16	0.323	7.94e-08	0	MRPL36	corneal stroma
AFDN	1.21e-05	-0.349453	0.398	0.499	0.238165	0	AFDN	corneal stroma
MFSD3	2.85e-11	-0.350935	0.29	0.457	5.58e-07	0	MFSD3	corneal stroma
SCN4A	1.36e-10	-0.351231	0.118	0.257	2.67e-06	0	SCN4A	corneal stroma
HAGH	2.26e-10	-0.351473	0.332	0.492	4.43e-06	0	HAGH	corneal stroma
PHF19	2.34e-07	-0.351645	0.531	0.62	0.00459364	0	PHF19	corneal stroma
ILDR2	5.97e-07	-0.351761	0.201	0.306	0.0117138	0	ILDR2	corneal stroma
ZNF276	6.57e-12	-0.352064	0.273	0.449	1.29e-07	0	ZNF276	corneal stroma
E2F2	3.14e-07	-0.352672	0.201	0.321	0.00616203	0	E2F2	corneal stroma
ZNF639	1.55e-09	-0.353281	0.297	0.437	3.03e-05	0	ZNF639	corneal stroma
ARG2	5.87e-13	-0.354444	0.236	0.397	1.15e-08	0	ARG2	corneal stroma
GCC2	6.66e-11	-0.354588	0.177	0.326	1.31e-06	0	GCC2	corneal stroma
ELMSAN1	0.000734377	-0.354673	0.774	0.783	1	0	ELMSAN1	corneal stroma
WDSUB1	7.46e-12	-0.354678	0.29	0.464	1.46e-07	0	WDSUB1	corneal stroma
HEY1	3.11e-10	-0.354764	0.327	0.479	6.1e-06	0	HEY1	corneal stroma
RP11-717K11.2	7.04e-10	-0.354845	0.314	0.467	1.38e-05	0	RP11-717K11.2	corneal stroma
TEX264	5.97e-12	-0.354978	0.253	0.42	1.17e-07	0	TEX264	corneal stroma
MRPS6	1.98e-06	-0.355246	0.452	0.545	0.0388096	0	MRPS6	corneal stroma
LRFN4	8.2e-11	-0.355277	0.224	0.378	1.61e-06	0	LRFN4	corneal stroma
RAB43	3.92e-08	-0.355593	0.415	0.53	0.000769378	0	RAB43	corneal stroma
CFD	3.81e-12	-0.356197	0.096	0.246	7.47e-08	0	CFD	corneal stroma
ECE2	1.36e-09	-0.356438	0.462	0.603	2.66e-05	0	ECE2	corneal stroma
KLLN	1.12e-06	-0.357432	0.425	0.524	0.0220002	0	KLLN	corneal stroma
RPL36	9.99e-09	-0.357491	0.663	0.758	0.000195798	0	RPL36	corneal stroma
NACA	0.00116456	-0.357633	0.361	0.43	1	0	NACA	corneal stroma
FOXN2	7.62e-10	-0.357659	0.518	0.659	1.49e-05	0	FOXN2	corneal stroma
GAPDH	1.08e-09	-0.357836	0.491	0.617	2.11e-05	0	GAPDH	corneal stroma
MGAT3	9.6e-08	-0.358048	0.275	0.4	0.0018826	0	MGAT3	corneal stroma
HMBS	8e-08	-0.358419	0.346	0.481	0.0015691	0	HMBS	corneal stroma
DYRK1B	2.35e-11	-0.358507	0.349	0.505	4.6e-07	0	DYRK1B	corneal stroma
LRRC24	8.6e-09	-0.359076	0.388	0.515	0.000168561	0	LRRC24	corneal stroma
CDKN1A	0.000101512	-0.359289	0.42	0.5	1	0	CDKN1A	corneal stroma
SCAF8	5.58e-11	-0.359719	0.445	0.6	1.09e-06	0	SCAF8	corneal stroma
TFR2	4.66e-08	-0.359729	0.236	0.354	0.000914043	0	TFR2	corneal stroma
BCAT2	3.97e-11	-0.359856	0.378	0.538	7.79e-07	0	BCAT2	corneal stroma
ZNF292	3.73e-10	-0.360075	0.499	0.636	7.31e-06	0	ZNF292	corneal stroma
WDR81	1.81e-09	-0.360156	0.715	0.802	3.54e-05	0	WDR81	corneal stroma
CAMTA2	1.24e-11	-0.360681	0.307	0.473	2.44e-07	0	CAMTA2	corneal stroma
HMOX1	4.13e-15	-0.3608	0.066	0.234	8.09e-11	0	HMOX1	corneal stroma
ABAT	8.62e-10	-0.361067	0.319	0.456	1.69e-05	0	ABAT	corneal stroma
LMO2	3.31e-10	-0.361173	0.135	0.279	6.5e-06	0	LMO2	corneal stroma
BEND6	1.31e-06	-0.361932	0.292	0.389	0.0257092	0	BEND6	corneal stroma
RAD51L3-RFFL	1.34e-09	-0.362144	0.361	0.506	2.62e-05	0	RAD51L3-RFFL	corneal stroma
NDUFAF6	1.26e-05	-0.362289	0.708	0.762	0.24683	0	NDUFAF6	corneal stroma
FAM214B	3.38e-11	-0.362379	0.686	0.788	6.63e-07	0	FAM214B	corneal stroma
KAT2B	1.61e-13	-0.362503	0.388	0.566	3.15e-09	0	KAT2B	corneal stroma
PGP	3.89e-12	-0.362602	0.373	0.537	7.62e-08	0	PGP	corneal stroma
ZNF672	5.02e-11	-0.362986	0.494	0.666	9.84e-07	0	ZNF672	corneal stroma
GMPPA	4.15e-11	-0.363576	0.295	0.447	8.13e-07	0	GMPPA	corneal stroma
HSP90AA1	1.72e-08	-0.363835	0.624	0.719	0.000337168	0	HSP90AA1	corneal stroma
TCP11L2	1.03e-06	-0.36526	0.359	0.455	0.020286	0	TCP11L2	corneal stroma
ATG4D	6.88e-14	-0.365416	0.123	0.295	1.35e-09	0	ATG4D	corneal stroma
OBSL1	2.53e-12	-0.365449	0.381	0.559	4.95e-08	0	OBSL1	corneal stroma
HBM	3.75e-15	-0.365497	0.064	0.233	7.35e-11	0	HBM	corneal stroma
RFFL	2.69e-11	-0.365883	0.292	0.454	5.28e-07	0	RFFL	corneal stroma
WRN	2.43e-08	-0.366249	0.484	0.607	0.000476002	0	WRN	corneal stroma
ABHD5	9.57e-09	-0.366543	0.346	0.483	0.000187583	0	ABHD5	corneal stroma
TP53INP2	6.22e-08	-0.366545	0.499	0.613	0.0012195	0	TP53INP2	corneal stroma
THAP4	4.68e-08	-0.366834	0.428	0.549	0.000918352	0	THAP4	corneal stroma
BAX	5.47e-13	-0.367038	0.177	0.348	1.07e-08	0	BAX	corneal stroma
MPL	5.29e-15	-0.367702	0.106	0.283	1.04e-10	0	MPL	corneal stroma
SKIL	3.18e-11	-0.368107	0.577	0.701	6.23e-07	0	SKIL	corneal stroma
MAGIX	2.2e-11	-0.368208	0.184	0.338	4.31e-07	0	MAGIX	corneal stroma
DACH1	4.8e-05	-0.368793	0.516	0.56	0.941984	0	DACH1	corneal stroma
SPINT2	8.38e-12	-0.369138	0.233	0.395	1.64e-07	0	SPINT2	corneal stroma
TGFB1I1	1.16e-10	-0.369361	0.189	0.335	2.27e-06	0	TGFB1I1	corneal stroma
RSPH9	2.78e-13	-0.369409	0.233	0.412	5.45e-09	0	RSPH9	corneal stroma
RAB10	5.94e-12	-0.369411	0.415	0.578	1.17e-07	0	RAB10	corneal stroma
ITGA7	5.01e-10	-0.369736	0.339	0.48	9.83e-06	0	ITGA7	corneal stroma
CELF6	2.4e-12	-0.369985	0.224	0.395	4.7e-08	0	CELF6	corneal stroma
ZNF821	1.41e-07	-0.369991	0.568	0.672	0.00277099	0	ZNF821	corneal stroma
SP6	5e-14	-0.370185	0.066	0.226	9.81e-10	0	SP6	corneal stroma
MYO18A	1.41e-09	-0.371314	0.58	0.675	2.76e-05	0	MYO18A	corneal stroma
ATP6V0C	1.26e-09	-0.371667	0.373	0.515	2.46e-05	0	ATP6V0C	corneal stroma
AHDC1	1.89e-08	-0.371718	0.698	0.77	0.000369719	0	AHDC1	corneal stroma
ROM1	1.83e-10	-0.372158	0.219	0.365	3.59e-06	0	ROM1	corneal stroma
CTC-398G3.6	3.88e-10	-0.37254	0.504	0.629	7.61e-06	0	CTC-398G3.6	corneal stroma
FAHD1	2.02e-11	-0.372585	0.3	0.464	3.96e-07	0	FAHD1	corneal stroma
SLC43A1	2.33e-12	-0.373049	0.236	0.407	4.57e-08	0	SLC43A1	corneal stroma
PIP5KL1	2.17e-11	-0.373203	0.268	0.418	4.26e-07	0	PIP5KL1	corneal stroma
TKT	1.17e-12	-0.373619	0.268	0.448	2.29e-08	0	TKT	corneal stroma
RP11-216L13.17	1e-11	-0.37366	0.568	0.706	1.96e-07	0	RP11-216L13.17	corneal stroma
2002-03-01	2.5e-09	-0.373934	0.371	0.505	4.9e-05	0	2002-03-01	corneal stroma
C1orf116	2.82e-12	-0.374509	0.037	0.168	5.53e-08	0	C1orf116	corneal stroma
SLC39A8	2.87e-05	-0.374859	0.405	0.487	0.563225	0	SLC39A8	corneal stroma
N4BP3	7.2e-12	-0.375343	0.182	0.354	1.41e-07	0	N4BP3	corneal stroma
STRADB	2.28e-10	-0.375569	0.457	0.599	4.48e-06	0	STRADB	corneal stroma
RNF187	1.13e-12	-0.375646	0.197	0.366	2.21e-08	0	RNF187	corneal stroma
HK1	5.39e-08	-0.376119	0.572	0.668	0.00105718	0	HK1	corneal stroma
PIP4K2B	1.61e-12	-0.376559	0.366	0.551	3.16e-08	0	PIP4K2B	corneal stroma
HSD11B1L	8.76e-10	-0.377078	0.548	0.676	1.72e-05	0	HSD11B1L	corneal stroma
SEC22C	1.59e-10	-0.377152	0.678	0.765	3.12e-06	0	SEC22C	corneal stroma
PHF13	5.26e-07	-0.377239	0.55	0.636	0.0103047	0	PHF13	corneal stroma
SPATA2L	1.28e-10	-0.377323	0.337	0.483	2.51e-06	0	SPATA2L	corneal stroma
PMS2	1.74e-12	-0.377908	0.366	0.539	3.4e-08	0	PMS2	corneal stroma
TRIM58	2.47e-10	-0.378358	0.074	0.2	4.84e-06	0	TRIM58	corneal stroma
GPI	4.38e-15	-0.378682	0.305	0.511	8.58e-11	0	GPI	corneal stroma
DYRK3	7.05e-09	-0.3795	0.376	0.509	0.000138213	0	DYRK3	corneal stroma
DHRS13	3.58e-12	-0.379797	0.258	0.427	7.03e-08	0	DHRS13	corneal stroma
NRBP1	1.3e-10	-0.380372	0.391	0.528	2.56e-06	0	NRBP1	corneal stroma
RGS9BP	3.07e-11	-0.380438	0.386	0.542	6.01e-07	0	RGS9BP	corneal stroma
CCNDBP1	1.29e-14	-0.380492	0.103	0.277	2.52e-10	0	CCNDBP1	corneal stroma
SSX2IP	2.72e-11	-0.380586	0.366	0.521	5.33e-07	0	SSX2IP	corneal stroma
TNK2	6.73e-06	-0.381245	0.548	0.618	0.131887	0	TNK2	corneal stroma
TRIM33	2.17e-08	-0.381328	0.371	0.494	0.000426213	0	TRIM33	corneal stroma
LMNTD2	4.08e-13	-0.381677	0.29	0.473	8.01e-09	0	LMNTD2	corneal stroma
PARD6B	1.01e-12	-0.382313	0.359	0.533	1.97e-08	0	PARD6B	corneal stroma
IST1	1.64e-07	-0.382712	0.651	0.735	0.00320827	0	IST1	corneal stroma
KCNH2	3.8e-07	-0.382817	0.312	0.429	0.00744162	0	KCNH2	corneal stroma
NOXO1	6.65e-15	-0.383414	0.238	0.427	1.3e-10	0	NOXO1	corneal stroma
MFAP3L	1.88e-10	-0.383494	0.334	0.493	3.68e-06	0	MFAP3L	corneal stroma
BAG5	3.76e-13	-0.383605	0.231	0.411	7.37e-09	0	BAG5	corneal stroma
2009-03-01	2.04e-15	-0.383878	0.088	0.267	3.99e-11	0	2009-03-01	corneal stroma
COLGALT1	2.03e-07	-0.385023	0.297	0.406	0.00397079	0	COLGALT1	corneal stroma
MDM2	7.07e-09	-0.385921	0.312	0.451	0.000138524	0	MDM2	corneal stroma
SCAP	4.72e-12	-0.386325	0.285	0.443	9.26e-08	0	SCAP	corneal stroma
FADS3	2.55e-13	-0.387823	0.189	0.363	5e-09	0	FADS3	corneal stroma
ARRDC1	9.79e-12	-0.388399	0.405	0.554	1.92e-07	0	ARRDC1	corneal stroma
RREB1	2.52e-05	-0.389234	0.577	0.641	0.494807	0	RREB1	corneal stroma
FHDC1	9.21e-07	-0.389292	0.275	0.383	0.0180545	0	FHDC1	corneal stroma
TMEM53	9.26e-14	-0.390107	0.511	0.678	1.82e-09	0	TMEM53	corneal stroma
BTG2	1.03e-09	-0.390317	0.428	0.566	2.02e-05	0	BTG2	corneal stroma
MGAT4B	1.1e-10	-0.390581	0.27	0.42	2.16e-06	0	MGAT4B	corneal stroma
GSDMA	2.27e-15	-0.391429	0.381	0.57	4.45e-11	0	GSDMA	corneal stroma
MOB1B	6.54e-09	-0.391517	0.486	0.609	0.000128153	0	MOB1B	corneal stroma
REXO1	3.31e-08	-0.392056	0.403	0.526	0.000649656	0	REXO1	corneal stroma
SLC35B2	1.51e-11	-0.392095	0.29	0.451	2.95e-07	0	SLC35B2	corneal stroma
NR2F6	4.07e-12	-0.39259	0.351	0.51	7.97e-08	0	NR2F6	corneal stroma
AC010646.3	2.84e-14	-0.393185	0.26	0.444	5.57e-10	0	AC010646.3	corneal stroma
WNK1	3.06e-09	-0.393224	0.629	0.721	6e-05	0	WNK1	corneal stroma
NTNG2	3.53e-07	-0.394175	0.425	0.543	0.0069305	0	NTNG2	corneal stroma
MKNK1	8.37e-10	-0.39418	0.334	0.481	1.64e-05	0	MKNK1	corneal stroma
PTK2B	8.93e-05	-0.39427	0.516	0.574	1	0	PTK2B	corneal stroma
ZNF775	9e-09	-0.394306	0.572	0.655	0.000176459	0	ZNF775	corneal stroma
RP4-583P15.15	1.68e-15	-0.394493	0.194	0.387	3.3e-11	0	RP4-583P15.15	corneal stroma
AXIN1	2.95e-13	-0.39507	0.415	0.581	5.79e-09	0	AXIN1	corneal stroma
AIMP2	5.07e-14	-0.395241	0.339	0.525	9.94e-10	0	AIMP2	corneal stroma
ATP2B1	6.6e-09	-0.395588	0.688	0.787	0.000129501	0	ATP2B1	corneal stroma
PIGQ	5.15e-08	-0.396315	0.275	0.391	0.00101045	0	PIGQ	corneal stroma
ISYNA1	2.95e-12	-0.397664	0.201	0.372	5.78e-08	0	ISYNA1	corneal stroma
RBM38	5.38e-11	-0.397861	0.287	0.445	1.06e-06	0	RBM38	corneal stroma
EZR	5.61e-11	-0.397927	0.283	0.439	1.1e-06	0	EZR	corneal stroma
NBEAL2	5.98e-10	-0.398008	0.452	0.573	1.17e-05	0	NBEAL2	corneal stroma
PAPD5	1.24e-09	-0.398157	0.457	0.569	2.43e-05	0	PAPD5	corneal stroma
ERBB3	1.02e-15	-0.398179	0.157	0.352	2e-11	0	ERBB3	corneal stroma
ZGPAT	7.43e-16	-0.398257	0.157	0.347	1.46e-11	0	ZGPAT	corneal stroma
FECH	2.25e-08	-0.3992	0.221	0.345	0.00044194	0	FECH	corneal stroma
PTTG1IP	1.23e-11	-0.399364	0.295	0.45	2.41e-07	0	PTTG1IP	corneal stroma
CLN8	6.38e-08	-0.40086	0.477	0.59	0.00125044	0	CLN8	corneal stroma
SOD2	2.66e-10	-0.400937	0.771	0.818	5.21e-06	0	SOD2	corneal stroma
WIPI1	2.48e-14	-0.402054	0.366	0.56	4.85e-10	0	WIPI1	corneal stroma
SH2B3	6.32e-08	-0.402093	0.428	0.54	0.0012401	0	SH2B3	corneal stroma
RASAL3	3.64e-14	-0.402201	0.106	0.281	7.13e-10	0	RASAL3	corneal stroma
SS18L2	7.99e-12	-0.403837	0.464	0.609	1.57e-07	0	SS18L2	corneal stroma
ASAH1	7.3e-14	-0.404113	0.248	0.427	1.43e-09	0	ASAH1	corneal stroma
NDRG1	1.42e-07	-0.404138	0.533	0.618	0.00277876	0	NDRG1	corneal stroma
TESC	4.61e-07	-0.404528	0.206	0.317	0.00903324	0	TESC	corneal stroma
TRAK2	4.03e-11	-0.40463	0.425	0.573	7.89e-07	0	TRAK2	corneal stroma
FURIN	5.89e-11	-0.404799	0.187	0.337	1.16e-06	0	FURIN	corneal stroma
NT5DC3	2.99e-12	-0.405031	0.224	0.385	5.86e-08	0	NT5DC3	corneal stroma
TMOD1	6.68e-08	-0.405097	0.248	0.372	0.00130995	0	TMOD1	corneal stroma
2008-03-01	4.39e-10	-0.405238	0.324	0.474	8.62e-06	0	2008-03-01	corneal stroma
HSP90AB1	9.86e-12	-0.406495	0.408	0.57	1.93e-07	0	HSP90AB1	corneal stroma
TMEM57	8.28e-12	-0.406756	0.445	0.595	1.62e-07	0	TMEM57	corneal stroma
SLC5A3	7.05e-11	-0.40742	0.342	0.49	1.38e-06	0	SLC5A3	corneal stroma
SRXN1	2.95e-14	-0.40823	0.138	0.313	5.78e-10	0	SRXN1	corneal stroma
BAG3	1.54e-12	-0.409073	0.3	0.465	3.01e-08	0	BAG3	corneal stroma
SFMBT1	4.72e-08	-0.409586	0.332	0.443	0.000925963	0	SFMBT1	corneal stroma
RP5-850E9.3	2.5e-12	-0.410355	0.319	0.486	4.9e-08	0	RP5-850E9.3	corneal stroma
EIF2AK1	3.88e-12	-0.410673	0.211	0.374	7.6e-08	0	EIF2AK1	corneal stroma
KLF11	1.66e-11	-0.410684	0.423	0.582	3.25e-07	0	KLF11	corneal stroma
SEMA7A	7.96e-16	-0.411454	0.162	0.361	1.56e-11	0	SEMA7A	corneal stroma
RP11-45M22.4	2.58e-07	-0.41249	0.405	0.503	0.00505522	0	RP11-45M22.4	corneal stroma
GFER	8.7e-18	-0.412746	0.197	0.403	1.71e-13	0	GFER	corneal stroma
SLC9A3R1	4.4e-18	-0.413759	0.199	0.424	8.63e-14	0	SLC9A3R1	corneal stroma
MKNK2	1.58e-13	-0.414561	0.486	0.641	3.11e-09	0	MKNK2	corneal stroma
SERPINI1	5.38e-11	-0.415776	0.479	0.627	1.06e-06	0	SERPINI1	corneal stroma
CAPN1	3.19e-10	-0.416563	0.243	0.38	6.26e-06	0	CAPN1	corneal stroma
ZNF768	4.1e-19	-0.416926	0.369	0.599	8.03e-15	0	ZNF768	corneal stroma
RAB3IP	1.15e-13	-0.417335	0.236	0.417	2.25e-09	0	RAB3IP	corneal stroma
EPOR	3.9e-13	-0.417685	0.344	0.51	7.65e-09	0	EPOR	corneal stroma
LLGL2	8.5e-14	-0.417782	0.197	0.377	1.67e-09	0	LLGL2	corneal stroma
FAM212B	6.78e-11	-0.41839	0.57	0.689	1.33e-06	0	FAM212B	corneal stroma
CBX7	2.82e-09	-0.4193	0.469	0.575	5.54e-05	0	CBX7	corneal stroma
MAFA	8.36e-11	-0.421598	0.339	0.49	1.64e-06	0	MAFA	corneal stroma
KLF3	1.92e-10	-0.421625	0.496	0.63	3.77e-06	0	KLF3	corneal stroma
KLHL21	2.24e-06	-0.422777	0.744	0.776	0.0439294	0	KLHL21	corneal stroma
AC002310.11	2.43e-16	-0.42396	0.477	0.667	4.77e-12	0	AC002310.11	corneal stroma
GYPC	0.000221403	-0.424703	0.273	0.345	1	0	GYPC	corneal stroma
C19orf45	4.31e-16	-0.424938	0.103	0.29	8.45e-12	0	C19orf45	corneal stroma
C7orf50	8.67e-12	-0.42514	0.759	0.834	1.7e-07	0	C7orf50	corneal stroma
MAPRE3	1.75e-12	-0.425248	0.278	0.445	3.43e-08	0	MAPRE3	corneal stroma
DENND2D	2.97e-12	-0.425491	0.066	0.212	5.83e-08	0	DENND2D	corneal stroma
CCDC183	8.71e-16	-0.426055	0.194	0.387	1.71e-11	0	CCDC183	corneal stroma
STRN4	9.41e-10	-0.426077	0.297	0.438	1.84e-05	0	STRN4	corneal stroma
ARVCF	1.76e-13	-0.426633	0.462	0.621	3.45e-09	0	ARVCF	corneal stroma
ZHX1	6.04e-11	-0.426737	0.45	0.597	1.18e-06	0	ZHX1	corneal stroma
POLR1D	4.62e-11	-0.427589	0.44	0.589	9.05e-07	0	POLR1D	corneal stroma
AGRN	3.86e-10	-0.427676	0.565	0.688	7.57e-06	0	AGRN	corneal stroma
ZNF367	2.22e-14	-0.427803	0.45	0.63	4.36e-10	0	ZNF367	corneal stroma
SEMA4B	1.28e-11	-0.428073	0.26	0.42	2.52e-07	0	SEMA4B	corneal stroma
CCDC92	3.65e-14	-0.428325	0.413	0.585	7.16e-10	0	CCDC92	corneal stroma
ANXA2R	1.62e-11	-0.428802	0.14	0.286	3.18e-07	0	ANXA2R	corneal stroma
EMC3	1.67e-13	-0.430377	0.381	0.538	3.27e-09	0	EMC3	corneal stroma
GET4	2.99e-09	-0.431141	0.405	0.528	5.87e-05	0	GET4	corneal stroma
SSC4D	1.07e-15	-0.432533	0.219	0.413	2.1e-11	0	SSC4D	corneal stroma
CACFD1	2.25e-14	-0.432802	0.354	0.54	4.42e-10	0	CACFD1	corneal stroma
NFE2	7.33e-13	-0.433239	0.115	0.274	1.44e-08	0	NFE2	corneal stroma
MSI2	1.06e-05	-0.433635	0.865	0.855	0.207387	0	MSI2	corneal stroma
AK7	5.78e-16	-0.434266	0.292	0.49	1.13e-11	0	AK7	corneal stroma
KIAA1161	1.66e-19	-0.434349	0.096	0.31	3.25e-15	0	KIAA1161	corneal stroma
RALGDS	9.08e-14	-0.434674	0.607	0.73	1.78e-09	0	RALGDS	corneal stroma
MYT1	3.14e-11	-0.435645	0.246	0.413	6.15e-07	0	MYT1	corneal stroma
CDK4	5.04e-12	-0.436546	0.44	0.592	9.87e-08	0	CDK4	corneal stroma
ZBTB7A	3.06e-10	-0.436676	0.565	0.686	6e-06	0	ZBTB7A	corneal stroma
TP53INP1	4.62e-14	-0.43822	0.236	0.414	9.06e-10	0	TP53INP1	corneal stroma
CTD-2207O23.12	5.37e-13	-0.440729	0.15	0.312	1.05e-08	0	CTD-2207O23.12	corneal stroma
NCOA4	4.11e-12	-0.443317	0.292	0.459	8.06e-08	0	NCOA4	corneal stroma
TUBA4B	3.04e-15	-0.443929	0.108	0.287	5.96e-11	0	TUBA4B	corneal stroma
FBXW4	1.02e-13	-0.444238	0.253	0.43	2e-09	0	FBXW4	corneal stroma
PDCD10	4.23e-12	-0.445004	0.467	0.621	8.29e-08	0	PDCD10	corneal stroma
SLC38A2	5.25e-10	-0.445512	0.457	0.588	1.03e-05	0	SLC38A2	corneal stroma
ZHX1-C8orf76	3.19e-10	-0.446901	0.528	0.655	6.26e-06	0	ZHX1-C8orf76	corneal stroma
FAM134A	1.78e-11	-0.44838	0.391	0.549	3.49e-07	0	FAM134A	corneal stroma
RAN	1.44e-13	-0.450262	0.31	0.476	2.83e-09	0	RAN	corneal stroma
SOX12	2.4e-13	-0.450412	0.614	0.735	4.7e-09	0	SOX12	corneal stroma
EXD3	2.86e-14	-0.450609	0.381	0.57	5.61e-10	0	EXD3	corneal stroma
CNPPD1	1.2e-11	-0.450861	0.386	0.547	2.36e-07	0	CNPPD1	corneal stroma
2003-03-01	3.21e-11	-0.451948	0.553	0.672	6.3e-07	0	2003-03-01	corneal stroma
NR1H2	4.58e-18	-0.453087	0.708	0.826	8.99e-14	0	NR1H2	corneal stroma
ABCB10	3.05e-13	-0.453712	0.396	0.568	5.99e-09	0	ABCB10	corneal stroma
MAFG	2.38e-12	-0.453753	0.376	0.531	4.67e-08	0	MAFG	corneal stroma
ATP8B3	6.67e-18	-0.453985	0.226	0.449	1.31e-13	0	ATP8B3	corneal stroma
UBAC1	1.72e-14	-0.453991	0.312	0.503	3.37e-10	0	UBAC1	corneal stroma
CHD7	5.19e-12	-0.455166	0.479	0.613	1.02e-07	0	CHD7	corneal stroma
RHCE	1.04e-12	-0.455267	0.42	0.579	2.04e-08	0	RHCE	corneal stroma
HES2	9.01e-14	-0.456207	0.091	0.253	1.77e-09	0	HES2	corneal stroma
RP11-20I23.3	4.76e-10	-0.456219	0.425	0.562	9.34e-06	0	RP11-20I23.3	corneal stroma
TRIM36	8.19e-14	-0.456486	0.209	0.39	1.61e-09	0	TRIM36	corneal stroma
VPS9D1	1.8e-15	-0.456898	0.29	0.492	3.53e-11	0	VPS9D1	corneal stroma
F11R	3.13e-17	-0.458939	0.106	0.301	6.14e-13	0	F11R	corneal stroma
EML3	1.73e-11	-0.459208	0.314	0.467	3.39e-07	0	EML3	corneal stroma
SLC43A2	6.59e-17	-0.459617	0.4	0.599	1.29e-12	0	SLC43A2	corneal stroma
IMPA2	6.08e-15	-0.461629	0.442	0.599	1.19e-10	0	IMPA2	corneal stroma
GMPR	5.48e-10	-0.462466	0.216	0.357	1.07e-05	0	GMPR	corneal stroma
SLC36A1	5.94e-16	-0.463329	0.184	0.38	1.17e-11	0	SLC36A1	corneal stroma
SPAG4	8.54e-16	-0.46403	0.27	0.461	1.68e-11	0	SPAG4	corneal stroma
CCND3	2.55e-09	-0.46444	0.624	0.703	5.01e-05	0	CCND3	corneal stroma
ANKRD27	5.21e-15	-0.464477	0.43	0.598	1.02e-10	0	ANKRD27	corneal stroma
BAIAP3	5.94e-19	-0.465393	0.187	0.409	1.17e-14	0	BAIAP3	corneal stroma
MDGA1	2.3e-09	-0.466384	0.344	0.467	4.52e-05	0	MDGA1	corneal stroma
CPEB2	1.12e-12	-0.467232	0.388	0.557	2.2e-08	0	CPEB2	corneal stroma
RSRP1	4.35e-11	-0.468153	0.523	0.648	8.53e-07	0	RSRP1	corneal stroma
CHPT1	1.34e-13	-0.470637	0.192	0.364	2.63e-09	0	CHPT1	corneal stroma
ACAP3	1.53e-14	-0.470982	0.516	0.665	3.01e-10	0	ACAP3	corneal stroma
SLC30A1	5.73e-13	-0.471008	0.386	0.549	1.12e-08	0	SLC30A1	corneal stroma
TMEM56-RWDD3	1.19e-10	-0.471069	0.366	0.518	2.33e-06	0	TMEM56-RWDD3	corneal stroma
LAMA5	3.93e-15	-0.473104	0.253	0.445	7.71e-11	0	LAMA5	corneal stroma
MXI1	6.14e-12	-0.476329	0.803	0.853	1.2e-07	0	MXI1	corneal stroma
BLVRB	4.74e-15	-0.476679	0.396	0.573	9.28e-11	0	BLVRB	corneal stroma
IL4I1	3.45e-15	-0.479251	0.42	0.596	6.76e-11	0	IL4I1	corneal stroma
BICDL1	5.08e-15	-0.479685	0.496	0.65	9.97e-11	0	BICDL1	corneal stroma
SVBP	1.4e-18	-0.480056	0.226	0.438	2.75e-14	0	SVBP	corneal stroma
RILP	3.35e-17	-0.480859	0.314	0.521	6.57e-13	0	RILP	corneal stroma
CCDC12	2.53e-11	-0.481267	0.6	0.697	4.96e-07	0	CCDC12	corneal stroma
KLF13	8.81e-15	-0.483964	0.74	0.827	1.73e-10	0	KLF13	corneal stroma
RP11-544M22.13	6.12e-18	-0.484461	0.15	0.358	1.2e-13	0	RP11-544M22.13	corneal stroma
COMTD1	2.55e-16	-0.484755	0.211	0.418	5.01e-12	0	COMTD1	corneal stroma
PCMTD2	3.11e-18	-0.485102	0.155	0.368	6.09e-14	0	PCMTD2	corneal stroma
NR1D1	2.56e-16	-0.486557	0.327	0.524	5.03e-12	0	NR1D1	corneal stroma
C11orf95	3.07e-13	-0.488673	0.307	0.483	6.02e-09	0	C11orf95	corneal stroma
ZNF664	2.69e-16	-0.489243	0.388	0.568	5.27e-12	0	ZNF664	corneal stroma
FAH	9.32e-17	-0.490514	0.238	0.434	1.83e-12	0	FAH	corneal stroma
COL18A1	1.03e-12	-0.490779	0.499	0.637	2.02e-08	0	COL18A1	corneal stroma
UCP2	1.57e-21	-0.491997	0.182	0.421	3.07e-17	0	UCP2	corneal stroma
TMEM52	1.9e-20	-0.492962	0.233	0.465	3.73e-16	0	TMEM52	corneal stroma
STK17A	9.59e-16	-0.493517	0.307	0.485	1.88e-11	0	STK17A	corneal stroma
LNX2	7.16e-15	-0.493713	0.403	0.584	1.4e-10	0	LNX2	corneal stroma
EPB42	3.45e-08	-0.494661	0.364	0.469	0.000676868	0	EPB42	corneal stroma
FAM210B	1.23e-14	-0.495265	0.201	0.385	2.41e-10	0	FAM210B	corneal stroma
NINJ2	2.89e-10	-0.496343	0.339	0.478	5.66e-06	0	NINJ2	corneal stroma
ASIC4	2.82e-11	-0.498802	0.378	0.516	5.52e-07	0	ASIC4	corneal stroma
HMGA1	1.4e-06	-0.499439	0.4	0.498	0.0274878	0	HMGA1	corneal stroma
CCDC24	3.52e-20	-0.499751	0.113	0.332	6.91e-16	0	CCDC24	corneal stroma
LGR4	1.03e-12	-0.502098	0.452	0.603	2.01e-08	0	LGR4	corneal stroma
TANGO2	2.75e-12	-0.504169	0.467	0.601	5.38e-08	0	TANGO2	corneal stroma
EHD1	7.91e-19	-0.505083	0.543	0.709	1.55e-14	0	EHD1	corneal stroma
TMEM56	2.24e-18	-0.506352	0.13	0.339	4.4e-14	0	TMEM56	corneal stroma
KIFC2	1.16e-13	-0.50655	0.413	0.574	2.28e-09	0	KIFC2	corneal stroma
TMBIM1	9.49e-13	-0.508262	0.273	0.435	1.86e-08	0	TMBIM1	corneal stroma
PTP4A2	2.5e-15	-0.514674	0.408	0.582	4.9e-11	0	PTP4A2	corneal stroma
GRID2IP	4.35e-13	-0.516495	0.408	0.558	8.54e-09	0	GRID2IP	corneal stroma
EPB41	2.42e-12	-0.51704	0.604	0.718	4.74e-08	0	EPB41	corneal stroma
SMIM1	3.61e-18	-0.517764	0.199	0.404	7.08e-14	0	SMIM1	corneal stroma
R3HDM4	1.7e-10	-0.519682	0.273	0.408	3.33e-06	0	R3HDM4	corneal stroma
TSPAN14	5.95e-15	-0.520706	0.484	0.641	1.17e-10	0	TSPAN14	corneal stroma
PIEZO1	7.35e-13	-0.523172	0.459	0.598	1.44e-08	0	PIEZO1	corneal stroma
PPP1R15A	7.36e-12	-0.52359	0.391	0.535	1.44e-07	0	PPP1R15A	corneal stroma
ANKRD53	8.05e-25	-0.526953	0.111	0.365	1.58e-20	0	ANKRD53	corneal stroma
SCRT1	4.08e-15	-0.527565	0.275	0.463	8e-11	0	SCRT1	corneal stroma
SLC25A37	2.71e-09	-0.529231	0.452	0.566	5.32e-05	0	SLC25A37	corneal stroma
BBC3	7.8e-09	-0.53043	0.491	0.597	0.000152882	0	BBC3	corneal stroma
THRA	1.86e-13	-0.530546	0.378	0.539	3.65e-09	0	THRA	corneal stroma
RNPEPL1	1.09e-18	-0.531637	0.241	0.463	2.14e-14	0	RNPEPL1	corneal stroma
PRR36	2.05e-18	-0.534312	0.349	0.569	4.02e-14	0	PRR36	corneal stroma
SGMS1	6.35e-11	-0.535408	0.683	0.777	1.24e-06	0	SGMS1	corneal stroma
CXXC5	2.71e-15	-0.535736	0.509	0.66	5.32e-11	0	CXXC5	corneal stroma
CYHR1	9.73e-13	-0.535922	0.531	0.665	1.91e-08	0	CYHR1	corneal stroma
PNKD	1.43e-13	-0.538333	0.742	0.814	2.8e-09	0	PNKD	corneal stroma
ANKMY1	4.29e-15	-0.540387	0.604	0.739	8.41e-11	0	ANKMY1	corneal stroma
RAB11FIP1	5.07e-17	-0.540391	0.246	0.446	9.94e-13	0	RAB11FIP1	corneal stroma
MTURN	1.11e-11	-0.541726	0.369	0.507	2.17e-07	0	MTURN	corneal stroma
ZNRF2	3.86e-22	-0.542701	0.386	0.62	7.58e-18	0	ZNRF2	corneal stroma
CDYL	6.65e-12	-0.544718	0.553	0.668	1.3e-07	0	CDYL	corneal stroma
TUBA4A	6.74e-11	-0.554697	0.511	0.619	1.32e-06	0	TUBA4A	corneal stroma
FAM20B	2.93e-16	-0.555141	0.327	0.513	5.74e-12	0	FAM20B	corneal stroma
ERMAP	2.22e-18	-0.563001	0.285	0.485	4.35e-14	0	ERMAP	corneal stroma
KLF1	3.92e-23	-0.56338	0.032	0.252	7.69e-19	0	KLF1	corneal stroma
SLC22A23	2.05e-12	-0.567764	0.585	0.7	4.02e-08	0	SLC22A23	corneal stroma
ICAM5	1.23e-18	-0.56918	0.172	0.38	2.41e-14	0	ICAM5	corneal stroma
UNKL	5.47e-17	-0.570134	0.324	0.529	1.07e-12	0	UNKL	corneal stroma
FAM46C	3.32e-18	-0.57167	0.206	0.421	6.51e-14	0	FAM46C	corneal stroma
ANKRD9	1.17e-17	-0.571927	0.29	0.491	2.29e-13	0	ANKRD9	corneal stroma
GADD45A	9.77e-22	-0.579417	0.41	0.638	1.91e-17	0	GADD45A	corneal stroma
SLC29A1	2.44e-22	-0.585617	0.246	0.488	4.79e-18	0	SLC29A1	corneal stroma
MICAL2	8.16e-13	-0.586943	0.482	0.613	1.6e-08	0	MICAL2	corneal stroma
LYL1	5.3e-18	-0.589736	0.108	0.305	1.04e-13	0	LYL1	corneal stroma
ACHE	1.79e-14	-0.590985	0.324	0.496	3.51e-10	0	ACHE	corneal stroma
HBG2	8.07e-09	-0.591165	0.371	0.484	0.000158299	0	HBG2	corneal stroma
SLC20A1	5.11e-19	-0.592743	0.322	0.517	1e-14	0	SLC20A1	corneal stroma
ESPN	1.41e-14	-0.593837	0.251	0.425	2.76e-10	0	ESPN	corneal stroma
SPTB	2.55e-17	-0.61069	0.415	0.61	5.01e-13	0	SPTB	corneal stroma
HOOK2	1.27e-15	-0.612879	0.885	0.906	2.49e-11	0	HOOK2	corneal stroma
CELSR3	9.35e-24	-0.613051	0.388	0.63	1.83e-19	0	CELSR3	corneal stroma
HBE1	1.22e-12	-0.614591	0.204	0.362	2.39e-08	0	HBE1	corneal stroma
NOL4L	7.21e-14	-0.620899	0.742	0.791	1.41e-09	0	NOL4L	corneal stroma
AL034550.1	4.37e-14	-0.624185	0.73	0.784	8.57e-10	0	AL034550.1	corneal stroma
CORO1C	3.24e-19	-0.626404	0.639	0.753	6.36e-15	0	CORO1C	corneal stroma
CHI3L2	2.37e-17	-0.62693	0.066	0.25	4.64e-13	0	CHI3L2	corneal stroma
ZBTB7B	6.99e-16	-0.627753	0.607	0.728	1.37e-11	0	ZBTB7B	corneal stroma
GRIN1	1.96e-13	-0.628175	0.182	0.349	3.84e-09	0	GRIN1	corneal stroma
DMTN	2.82e-14	-0.630281	0.27	0.442	5.53e-10	0	DMTN	corneal stroma
ELL2	4.55e-16	-0.633473	0.418	0.577	8.91e-12	0	ELL2	corneal stroma
EHBP1L1	4.35e-17	-0.641361	0.314	0.505	8.52e-13	0	EHBP1L1	corneal stroma
CKB	6e-22	-0.641409	0.16	0.387	1.18e-17	0	CKB	corneal stroma
LTBP3	3.08e-20	-0.64513	0.447	0.634	6.05e-16	0	LTBP3	corneal stroma
[truncated: 48,102 more rows]

## Sheet: PCW8_15189.2
15189.2; 8.5 PCW; Full Eye
	p_val	avg_log2FC	pct.1	pct.2	p_val_adj	cluster	gene	cell fate
ROR1	7.2e-57	0.87566	0.913	0.54	1.41e-52	0	ROR1	corneal stroma
WWTR1	3.66e-51	0.846294	0.901	0.526	7.18e-47	0	WWTR1	corneal stroma
TGFBR3	8.53e-49	0.783114	0.869	0.501	1.67e-44	0	TGFBR3	corneal stroma
NFATC1	7.23e-42	0.764986	0.889	0.571	1.42e-37	0	NFATC1	corneal stroma
PALLD	5.85e-46	0.746698	0.933	0.623	1.15e-41	0	PALLD	corneal stroma
FGFR2	2.19e-36	0.74624	0.708	0.373	4.3e-32	0	FGFR2	corneal stroma
CENPP	2.31e-38	0.745919	0.813	0.565	4.53e-34	0	CENPP	corneal stroma
CUBN	4.23e-37	0.741282	0.845	0.543	8.3e-33	0	CUBN	corneal stroma
LHFPL2	3.66e-41	0.738561	0.883	0.579	7.18e-37	0	LHFPL2	corneal stroma
RALGPS1	9.75e-38	0.737776	0.907	0.742	1.91e-33	0	RALGPS1	corneal stroma
BNC2	1.08e-40	0.729503	0.854	0.543	2.11e-36	0	BNC2	corneal stroma
MYOF	3.95e-43	0.729461	0.799	0.436	7.74e-39	0	MYOF	corneal stroma
PHLDB2	2.39e-39	0.713725	0.796	0.455	4.68e-35	0	PHLDB2	corneal stroma
CMSS1	1.43e-31	0.7112	0.875	0.644	2.8e-27	0	CMSS1	corneal stroma
EBF1	7.99e-39	0.710462	0.904	0.578	1.57e-34	0	EBF1	corneal stroma
PFKP	1.07e-40	0.707743	0.592	0.258	2.1e-36	0	PFKP	corneal stroma
SULF1	6.8e-39	0.703366	0.703	0.368	1.33e-34	0	SULF1	corneal stroma
ARID5B	6.74e-40	0.700361	0.843	0.488	1.32e-35	0	ARID5B	corneal stroma
SYNPO2	8.29e-29	0.695869	0.688	0.397	1.63e-24	0	SYNPO2	corneal stroma
DPYSL3	2.07e-34	0.694651	0.746	0.438	4.05e-30	0	DPYSL3	corneal stroma
EIF4G3	4.76e-13	0.691189	0.673	0.506	9.33e-09	0	EIF4G3	corneal stroma
PRRX1	2.55e-38	0.678173	0.65	0.309	5e-34	0	PRRX1	corneal stroma
PIEZO2	5.09e-29	0.668131	0.726	0.455	9.97e-25	0	PIEZO2	corneal stroma
SLC27A6	8.97e-38	0.666948	0.825	0.511	1.76e-33	0	SLC27A6	corneal stroma
FILIP1L	8.68e-29	0.666685	0.822	0.566	1.7e-24	0	FILIP1L	corneal stroma
IQCK	4.63e-24	0.659793	0.641	0.414	9.07e-20	0	IQCK	corneal stroma
FLI1	1.19e-20	0.658365	0.58	0.333	2.34e-16	0	FLI1	corneal stroma
SMG6	2.69e-39	0.65533	0.927	0.774	5.27e-35	0	SMG6	corneal stroma
PLCXD2	7.58e-34	0.654351	0.729	0.423	1.49e-29	0	PLCXD2	corneal stroma
SAMD4A	1.43e-37	0.651238	0.866	0.535	2.8e-33	0	SAMD4A	corneal stroma
MTUS1	2.9e-27	0.649387	0.676	0.406	5.69e-23	0	MTUS1	corneal stroma
SASH1	3.91e-33	0.643439	0.828	0.516	7.66e-29	0	SASH1	corneal stroma
SMAD3	9.93e-35	0.642752	0.88	0.612	1.95e-30	0	SMAD3	corneal stroma
TRIO	1.16e-37	0.634937	0.98	0.75	2.27e-33	0	TRIO	corneal stroma
SPAG17	1.05e-33	0.634351	0.65	0.343	2.06e-29	0	SPAG17	corneal stroma
TGFBI	1.72e-28	0.632618	0.574	0.284	3.36e-24	0	TGFBI	corneal stroma
FILIP1	5.05e-16	0.631947	0.528	0.331	9.9e-12	0	FILIP1	corneal stroma
COL27A1	1.73e-34	0.63091	0.86	0.532	3.4e-30	0	COL27A1	corneal stroma
HUNK	1.22e-30	0.630169	0.676	0.383	2.38e-26	0	HUNK	corneal stroma
ADAM12	6.72e-22	0.624166	0.755	0.492	1.32e-17	0	ADAM12	corneal stroma
ARSB	1.6e-28	0.618921	0.776	0.531	3.13e-24	0	ARSB	corneal stroma
PAPPA	8.69e-32	0.61696	0.688	0.409	1.7e-27	0	PAPPA	corneal stroma
COL14A1	2.25e-30	0.614641	0.732	0.437	4.41e-26	0	COL14A1	corneal stroma
PRICKLE2	1.05e-35	0.613776	0.851	0.531	2.06e-31	0	PRICKLE2	corneal stroma
SLC35F4	3.36e-22	0.613147	0.56	0.323	6.58e-18	0	SLC35F4	corneal stroma
ME3	1.13e-27	0.611075	0.729	0.451	2.21e-23	0	ME3	corneal stroma
TANC2	1.77e-23	0.610576	0.703	0.453	3.47e-19	0	TANC2	corneal stroma
DOCK2	1.21e-29	0.610137	0.72	0.43	2.38e-25	0	DOCK2	corneal stroma
BICC1	3.38e-29	0.610037	0.761	0.481	6.63e-25	0	BICC1	corneal stroma
CYP1B1	8.7e-40	0.609669	0.618	0.267	1.71e-35	0	CYP1B1	corneal stroma
GUCY1A2	2.19e-28	0.608891	0.676	0.396	4.29e-24	0	GUCY1A2	corneal stroma
AFAP1	9.39e-31	0.608675	0.857	0.543	1.84e-26	0	AFAP1	corneal stroma
NFIB	1.11e-34	0.607858	0.93	0.622	2.17e-30	0	NFIB	corneal stroma
SH3PXD2B	1.62e-31	0.607534	0.793	0.508	3.19e-27	0	SH3PXD2B	corneal stroma
PDZRN3	4.12e-36	0.606738	0.84	0.484	8.08e-32	0	PDZRN3	corneal stroma
SIPA1L1	4.48e-27	0.603997	0.816	0.63	8.78e-23	0	SIPA1L1	corneal stroma
ERG	3.45e-31	0.6022	0.673	0.368	6.77e-27	0	ERG	corneal stroma
DYM	6.8e-21	0.599109	0.682	0.488	1.33e-16	0	DYM	corneal stroma
ADAMTS3	7.34e-21	0.598018	0.624	0.388	1.44e-16	0	ADAMTS3	corneal stroma
SPSB1	5.73e-26	0.595571	0.653	0.391	1.12e-21	0	SPSB1	corneal stroma
SLC14A2	5.57e-15	0.594469	0.697	0.507	1.09e-10	0	SLC14A2	corneal stroma
ITGA9	2.38e-31	0.594372	0.857	0.552	4.67e-27	0	ITGA9	corneal stroma
LDB2	8.69e-29	0.589323	0.773	0.47	1.7e-24	0	LDB2	corneal stroma
FBN1	7.92e-33	0.586599	0.764	0.446	1.55e-28	0	FBN1	corneal stroma
VWA3B	1.24e-10	0.585388	0.484	0.314	2.42e-06	0	VWA3B	corneal stroma
NMNAT2	1.56e-18	0.58492	0.58	0.34	3.07e-14	0	NMNAT2	corneal stroma
COLEC12	1.76e-27	0.583861	0.732	0.466	3.46e-23	0	COLEC12	corneal stroma
DSE	7.33e-30	0.583535	0.866	0.624	1.44e-25	0	DSE	corneal stroma
ETS1	5.27e-33	0.581537	0.761	0.43	1.03e-28	0	ETS1	corneal stroma
TMEM132C	1.01e-28	0.578084	0.781	0.48	1.98e-24	0	TMEM132C	corneal stroma
SH3RF1	2.68e-26	0.578019	0.729	0.433	5.26e-22	0	SH3RF1	corneal stroma
ANKRD44	1.17e-22	0.577141	0.723	0.482	2.3e-18	0	ANKRD44	corneal stroma
KIF6	7.57e-18	0.575157	0.609	0.393	1.48e-13	0	KIF6	corneal stroma
SH3PXD2A	1.24e-30	0.573254	0.889	0.608	2.43e-26	0	SH3PXD2A	corneal stroma
FAT4	1.74e-27	0.571095	0.711	0.425	3.4e-23	0	FAT4	corneal stroma
FBN2	2.14e-28	0.569612	0.813	0.539	4.19e-24	0	FBN2	corneal stroma
GAREM1	1.8e-17	0.568988	0.793	0.571	3.52e-13	0	GAREM1	corneal stroma
TRAF3IP2	2.96e-26	0.56362	0.621	0.359	5.81e-22	0	TRAF3IP2	corneal stroma
ATXN1	5.29e-24	0.561316	0.857	0.608	1.04e-19	0	ATXN1	corneal stroma
CREB3L1	4.34e-22	0.561044	0.621	0.381	8.51e-18	0	CREB3L1	corneal stroma
CARMIL1	4.6e-22	0.560662	0.659	0.414	9.02e-18	0	CARMIL1	corneal stroma
LMNTD1	3.14e-26	0.559999	0.56	0.291	6.16e-22	0	LMNTD1	corneal stroma
OSBPL10	3.49e-18	0.559834	0.665	0.447	6.85e-14	0	OSBPL10	corneal stroma
BCAS1	5.65e-06	0.557112	0.329	0.224	0.110822	0	BCAS1	corneal stroma
FBXL7	1.17e-20	0.556181	0.755	0.5	2.29e-16	0	FBXL7	corneal stroma
FLNB	1.65e-21	0.55515	0.671	0.441	3.24e-17	0	FLNB	corneal stroma
TES	9.89e-32	0.555075	0.545	0.249	1.94e-27	0	TES	corneal stroma
SIX2	1.26e-30	0.554978	0.598	0.292	2.47e-26	0	SIX2	corneal stroma
ALX4	3.12e-31	0.553724	0.601	0.296	6.11e-27	0	ALX4	corneal stroma
PANX1	8.88e-27	0.551653	0.601	0.32	1.74e-22	0	PANX1	corneal stroma
EBF2	3.6e-31	0.550607	0.714	0.402	7.05e-27	0	EBF2	corneal stroma
UPP2	2.58e-22	0.550252	0.72	0.479	5.06e-18	0	UPP2	corneal stroma
GNA14	2.79e-24	0.550192	0.58	0.33	5.47e-20	0	GNA14	corneal stroma
UST	6.65e-25	0.549979	0.784	0.501	1.3e-20	0	UST	corneal stroma
HRH1	2.39e-24	0.547676	0.504	0.252	4.69e-20	0	HRH1	corneal stroma
TTLL5	9.87e-26	0.547659	0.845	0.698	1.94e-21	0	TTLL5	corneal stroma
ARHGAP28	3.97e-23	0.544197	0.793	0.558	7.79e-19	0	ARHGAP28	corneal stroma
VIT	5.15e-20	0.542982	0.411	0.199	1.01e-15	0	VIT	corneal stroma
ADAMTSL3	6.03e-27	0.539571	0.624	0.327	1.18e-22	0	ADAMTSL3	corneal stroma
C12orf60	2.28e-21	0.539423	0.735	0.539	4.47e-17	0	C12orf60	corneal stroma
C8orf34	1.93e-26	0.53926	0.668	0.4	3.79e-22	0	C8orf34	corneal stroma
BACH2	9.98e-27	0.539109	0.892	0.628	1.96e-22	0	BACH2	corneal stroma
MMP16	1.17e-21	0.538861	0.694	0.45	2.3e-17	0	MMP16	corneal stroma
VCAN	2.61e-25	0.535431	0.761	0.464	5.13e-21	0	VCAN	corneal stroma
ANKS6	0.000110281	0.534726	0.338	0.244	1	0	ANKS6	corneal stroma
COL1A1	1.89e-27	0.534221	0.72	0.422	3.7e-23	0	COL1A1	corneal stroma
LOXL2	6.22e-24	0.53225	0.773	0.509	1.22e-19	0	LOXL2	corneal stroma
SAMD5	2.64e-28	0.531517	0.638	0.358	5.18e-24	0	SAMD5	corneal stroma
PALM2-AKAP2	1.39e-25	0.531227	0.802	0.522	2.73e-21	0	PALM2-AKAP2	corneal stroma
TG	2.66e-22	0.530151	0.726	0.473	5.22e-18	0	TG	corneal stroma
ANO3	5.36e-09	0.529861	0.443	0.29	0.00010513	0	ANO3	corneal stroma
VPS13D	2.58e-23	0.527935	0.784	0.577	5.06e-19	0	VPS13D	corneal stroma
MAML2	5.86e-26	0.526757	0.854	0.582	1.15e-21	0	MAML2	corneal stroma
AC013264.1	1.1e-19	0.525592	0.694	0.468	2.16e-15	0	AC013264.1	corneal stroma
SSPN	2.51e-24	0.525474	0.673	0.396	4.93e-20	0	SSPN	corneal stroma
DNMBP	9.41e-22	0.524422	0.612	0.392	1.84e-17	0	DNMBP	corneal stroma
EYA2	4.76e-24	0.522798	0.732	0.454	9.33e-20	0	EYA2	corneal stroma
MBP	6.06e-22	0.52191	0.729	0.48	1.19e-17	0	MBP	corneal stroma
CTC-441N14.4	3.18e-24	0.521013	0.431	0.197	6.24e-20	0	CTC-441N14.4	corneal stroma
TIAM1	1.25e-23	0.520959	0.848	0.598	2.44e-19	0	TIAM1	corneal stroma
LRRC49	3.15e-23	0.520043	0.598	0.332	6.17e-19	0	LRRC49	corneal stroma
MDFIC	3.27e-18	0.519761	0.49	0.272	6.42e-14	0	MDFIC	corneal stroma
RGS5	5.69e-21	0.519214	0.58	0.347	1.12e-16	0	RGS5	corneal stroma
ATOH8	1.65e-22	0.518497	0.668	0.399	3.23e-18	0	ATOH8	corneal stroma
DCLK1	1.1e-25	0.517719	0.781	0.488	2.16e-21	0	DCLK1	corneal stroma
TCF7L1	4.59e-26	0.514058	0.866	0.571	9.01e-22	0	TCF7L1	corneal stroma
ARHGAP44	2.92e-11	0.513661	0.402	0.243	5.72e-07	0	ARHGAP44	corneal stroma
HTRA1	5.76e-20	0.513075	0.49	0.251	1.13e-15	0	HTRA1	corneal stroma
TBX15	4.39e-24	0.509613	0.566	0.291	8.61e-20	0	TBX15	corneal stroma
PRRX2	2.21e-22	0.509598	0.534	0.29	4.34e-18	0	PRRX2	corneal stroma
PLEKHG1	3.99e-25	0.50907	0.822	0.549	7.82e-21	0	PLEKHG1	corneal stroma
NREP	7.26e-24	0.508126	0.793	0.547	1.42e-19	0	NREP	corneal stroma
HS3ST3B1	1.33e-21	0.508068	0.714	0.459	2.61e-17	0	HS3ST3B1	corneal stroma
ETV1	4.27e-23	0.508032	0.717	0.456	8.38e-19	0	ETV1	corneal stroma
COL5A1	3.58e-27	0.507555	0.866	0.542	7.03e-23	0	COL5A1	corneal stroma
CCDC102B	2.08e-17	0.507513	0.612	0.396	4.07e-13	0	CCDC102B	corneal stroma
PCSK5	1.55e-18	0.507284	0.735	0.507	3.04e-14	0	PCSK5	corneal stroma
AKAP13	1.29e-25	0.505389	0.88	0.688	2.52e-21	0	AKAP13	corneal stroma
STX8	1.27e-20	0.504447	0.633	0.397	2.5e-16	0	STX8	corneal stroma
ANTXR1	2.08e-27	0.503939	0.793	0.478	4.08e-23	0	ANTXR1	corneal stroma
PLXNC1	7.67e-18	0.503928	0.668	0.449	1.5e-13	0	PLXNC1	corneal stroma
GAS7	2.76e-21	0.503641	0.825	0.527	5.41e-17	0	GAS7	corneal stroma
TACC2	3.24e-19	0.503357	0.802	0.518	6.35e-15	0	TACC2	corneal stroma
C9orf3	3.59e-17	0.503182	0.796	0.63	7.04e-13	0	C9orf3	corneal stroma
PRDM16	7.7e-31	0.503129	0.878	0.571	1.51e-26	0	PRDM16	corneal stroma
LDLRAD4	1.79e-22	0.501171	0.845	0.598	3.51e-18	0	LDLRAD4	corneal stroma
NGF	6.94e-26	0.500428	0.443	0.193	1.36e-21	0	NGF	corneal stroma
ROR2	4.78e-18	0.499504	0.808	0.664	9.38e-14	0	ROR2	corneal stroma
PRKCH	1.42e-15	0.497678	0.668	0.459	2.77e-11	0	PRKCH	corneal stroma
PLD1	1.37e-25	0.497429	0.706	0.426	2.68e-21	0	PLD1	corneal stroma
MTHFD1L	4.91e-20	0.497097	0.787	0.582	9.62e-16	0	MTHFD1L	corneal stroma
C1QTNF7	7.42e-27	0.496834	0.58	0.294	1.45e-22	0	C1QTNF7	corneal stroma
LPAR1	8.68e-27	0.496558	0.592	0.311	1.7e-22	0	LPAR1	corneal stroma
2009-09-01	1.32e-22	0.496365	0.907	0.695	2.6e-18	0	2009-09-01	corneal stroma
KCNJ15	7.34e-17	0.495833	0.443	0.233	1.44e-12	0	KCNJ15	corneal stroma
MMP2	1.64e-21	0.495777	0.574	0.329	3.22e-17	0	MMP2	corneal stroma
SCMH1	6.31e-16	0.494937	0.609	0.426	1.24e-11	0	SCMH1	corneal stroma
SPATS2L	1.57e-20	0.493921	0.671	0.428	3.07e-16	0	SPATS2L	corneal stroma
LRIG3	3.18e-26	0.492944	0.571	0.286	6.24e-22	0	LRIG3	corneal stroma
CALD1	2.83e-13	0.492878	0.636	0.449	5.55e-09	0	CALD1	corneal stroma
RUNX2	2.08e-19	0.491963	0.805	0.598	4.07e-15	0	RUNX2	corneal stroma
COL12A1	1.65e-28	0.489908	0.665	0.349	3.24e-24	0	COL12A1	corneal stroma
ARNT2	1.7e-20	0.489705	0.592	0.356	3.33e-16	0	ARNT2	corneal stroma
LRRC8C	8.76e-21	0.489086	0.592	0.355	1.72e-16	0	LRRC8C	corneal stroma
PDE7B	2.65e-19	0.488067	0.688	0.45	5.19e-15	0	PDE7B	corneal stroma
TXLNB	5.36e-24	0.487888	0.431	0.196	1.05e-19	0	TXLNB	corneal stroma
PARVA	2.37e-19	0.487264	0.638	0.397	4.64e-15	0	PARVA	corneal stroma
GRK5	9.46e-19	0.486906	0.886	0.75	1.86e-14	0	GRK5	corneal stroma
SPRED1	1.26e-19	0.485438	0.63	0.383	2.46e-15	0	SPRED1	corneal stroma
SHOX	2.14e-21	0.485168	0.359	0.15	4.2e-17	0	SHOX	corneal stroma
BMPER	8.32e-22	0.484676	0.624	0.361	1.63e-17	0	BMPER	corneal stroma
FOXL2NB	6.12e-27	0.484499	0.449	0.196	1.2e-22	0	FOXL2NB	corneal stroma
IL1R1	2.92e-15	0.484057	0.493	0.286	5.73e-11	0	IL1R1	corneal stroma
NKD1	6.78e-15	0.483213	0.603	0.395	1.33e-10	0	NKD1	corneal stroma
HMCN1	2.64e-17	0.483184	0.65	0.432	5.18e-13	0	HMCN1	corneal stroma
RHOBTB1	2.23e-19	0.482543	0.618	0.38	4.38e-15	0	RHOBTB1	corneal stroma
PRSS23	6.85e-16	0.481748	0.583	0.387	1.34e-11	0	PRSS23	corneal stroma
MRPS22	1.86e-21	0.481166	0.711	0.473	3.64e-17	0	MRPS22	corneal stroma
EFCAB11	4.93e-17	0.479973	0.781	0.622	9.67e-13	0	EFCAB11	corneal stroma
CADM1	4.16e-22	0.479712	0.77	0.483	8.16e-18	0	CADM1	corneal stroma
KCNS3	1.77e-17	0.479564	0.633	0.419	3.47e-13	0	KCNS3	corneal stroma
RBFOX2	4.38e-22	0.478375	0.878	0.723	8.58e-18	0	RBFOX2	corneal stroma
HCN1	6.56e-15	0.478362	0.525	0.33	1.29e-10	0	HCN1	corneal stroma
ANGPT1	6.99e-20	0.478268	0.536	0.308	1.37e-15	0	ANGPT1	corneal stroma
LRCH1	2.8e-23	0.477736	0.714	0.431	5.49e-19	0	LRCH1	corneal stroma
ADAMTS9	8.37e-22	0.474798	0.7	0.416	1.64e-17	0	ADAMTS9	corneal stroma
ATF6	3.56e-14	0.47395	0.577	0.4	6.97e-10	0	ATF6	corneal stroma
PKNOX2	8.22e-22	0.473864	0.875	0.603	1.61e-17	0	PKNOX2	corneal stroma
KIRREL	1.88e-20	0.473678	0.717	0.46	3.68e-16	0	KIRREL	corneal stroma
HMGA2	5.65e-19	0.473474	0.656	0.404	1.11e-14	0	HMGA2	corneal stroma
DKK2	9.56e-20	0.472871	0.592	0.368	1.88e-15	0	DKK2	corneal stroma
FRMD6	6.04e-16	0.472783	0.708	0.524	1.18e-11	0	FRMD6	corneal stroma
MYO1E	1.07e-12	0.472601	0.595	0.414	2.1e-08	0	MYO1E	corneal stroma
ABLIM1	1.17e-16	0.472416	0.647	0.428	2.29e-12	0	ABLIM1	corneal stroma
DDR2	1.14e-21	0.472267	0.612	0.358	2.23e-17	0	DDR2	corneal stroma
NFATC2	1.49e-15	0.471958	0.793	0.639	2.93e-11	0	NFATC2	corneal stroma
SHISA6	4.57e-08	0.471229	0.437	0.301	0.000895384	0	SHISA6	corneal stroma
TMC1	8.29e-16	0.470926	0.539	0.343	1.62e-11	0	TMC1	corneal stroma
BTBD16	7.43e-21	0.470877	0.405	0.184	1.46e-16	0	BTBD16	corneal stroma
ATP9A	5.36e-17	0.470605	0.621	0.403	1.05e-12	0	ATP9A	corneal stroma
FMN1	8.6e-19	0.470387	0.7	0.453	1.69e-14	0	FMN1	corneal stroma
TMEM51	1.44e-19	0.469206	0.522	0.292	2.82e-15	0	TMEM51	corneal stroma
ALG14	2.5e-16	0.468961	0.624	0.446	4.9e-12	0	ALG14	corneal stroma
FARP1	9.07e-15	0.468886	0.799	0.617	1.78e-10	0	FARP1	corneal stroma
PITX2	3.58e-20	0.468668	0.627	0.365	7.02e-16	0	PITX2	corneal stroma
OXCT1	7.36e-17	0.468279	0.557	0.361	1.44e-12	0	OXCT1	corneal stroma
MICALCL	7.13e-18	0.467439	0.504	0.282	1.4e-13	0	MICALCL	corneal stroma
GRIA3	1.72e-07	0.467419	0.335	0.208	0.00336641	0	GRIA3	corneal stroma
GLIS1	1.91e-21	0.467385	0.776	0.553	3.75e-17	0	GLIS1	corneal stroma
FNDC3B	2.11e-21	0.467229	0.878	0.654	4.13e-17	0	FNDC3B	corneal stroma
NRP1	1.23e-22	0.465324	0.697	0.418	2.4e-18	0	NRP1	corneal stroma
NHS	1.28e-19	0.465035	0.671	0.43	2.51e-15	0	NHS	corneal stroma
NID2	2.45e-23	0.464969	0.504	0.253	4.8e-19	0	NID2	corneal stroma
IFT43	6.68e-21	0.464213	0.711	0.476	1.31e-16	0	IFT43	corneal stroma
PIK3C2G	9.21e-14	0.462908	0.478	0.296	1.81e-09	0	PIK3C2G	corneal stroma
FMNL2	5.82e-18	0.462666	0.802	0.632	1.14e-13	0	FMNL2	corneal stroma
NTRK2	3.75e-19	0.462567	0.633	0.394	7.36e-15	0	NTRK2	corneal stroma
ALCAM	4.99e-14	0.46244	0.536	0.345	9.77e-10	0	ALCAM	corneal stroma
ABI3BP	3.87e-22	0.462359	0.574	0.326	7.59e-18	0	ABI3BP	corneal stroma
ATG7	2.17e-17	0.462343	0.755	0.544	4.25e-13	0	ATG7	corneal stroma
PLA2G4A	7.93e-21	0.462079	0.539	0.296	1.56e-16	0	PLA2G4A	corneal stroma
RP11-506B6.7	7.13e-18	0.461642	0.586	0.347	1.4e-13	0	RP11-506B6.7	corneal stroma
ZFHX4	3.97e-17	0.460956	0.647	0.417	7.78e-13	0	ZFHX4	corneal stroma
LMNA	1.04e-23	0.46034	0.915	0.74	2.03e-19	0	LMNA	corneal stroma
CLEC16A	7.25e-15	0.460287	0.808	0.69	1.42e-10	0	CLEC16A	corneal stroma
POLR2M	1.08e-24	0.459408	0.519	0.254	2.12e-20	0	POLR2M	corneal stroma
TGFB3	7.49e-21	0.459259	0.557	0.32	1.47e-16	0	TGFB3	corneal stroma
YAP1	6.27e-18	0.458785	0.653	0.421	1.23e-13	0	YAP1	corneal stroma
PLB1	4.97e-19	0.458778	0.644	0.41	9.75e-15	0	PLB1	corneal stroma
NAV1	4.9e-19	0.458592	0.767	0.506	9.6e-15	0	NAV1	corneal stroma
NDNF	2.68e-21	0.457164	0.367	0.159	5.25e-17	0	NDNF	corneal stroma
SNTB1	1.33e-19	0.456646	0.601	0.36	2.61e-15	0	SNTB1	corneal stroma
ADAMTS19	8.69e-23	0.456602	0.633	0.359	1.7e-18	0	ADAMTS19	corneal stroma
TRERF1	1.29e-16	0.45573	0.714	0.501	2.53e-12	0	TRERF1	corneal stroma
SHROOM4	3.35e-20	0.455213	0.484	0.252	6.57e-16	0	SHROOM4	corneal stroma
ADAMTS2	9.19e-20	0.454007	0.755	0.523	1.8e-15	0	ADAMTS2	corneal stroma
CAV2	1.15e-13	0.453923	0.499	0.312	2.25e-09	0	CAV2	corneal stroma
RNF122	2.82e-22	0.453877	0.641	0.363	5.53e-18	0	RNF122	corneal stroma
ITPR1	3.68e-18	0.45337	0.816	0.626	7.21e-14	0	ITPR1	corneal stroma
EGFR	5.27e-20	0.452944	0.714	0.463	1.03e-15	0	EGFR	corneal stroma
DNAH6	1.13e-14	0.451753	0.501	0.305	2.21e-10	0	DNAH6	corneal stroma
UNC5B	9.57e-19	0.451487	0.665	0.418	1.88e-14	0	UNC5B	corneal stroma
SMOC2	2.71e-20	0.451147	0.627	0.365	5.32e-16	0	SMOC2	corneal stroma
TBX18	1.45e-15	0.450446	0.525	0.314	2.85e-11	0	TBX18	corneal stroma
PALM2	2.49e-21	0.449603	0.703	0.437	4.88e-17	0	PALM2	corneal stroma
ETV6	1.94e-15	0.449353	0.717	0.499	3.81e-11	0	ETV6	corneal stroma
FOXL2	3.32e-24	0.447696	0.408	0.175	6.5e-20	0	FOXL2	corneal stroma
GCOM1	2.32e-20	0.447521	0.542	0.303	4.55e-16	0	GCOM1	corneal stroma
SLC4A4	5.49e-09	0.447071	0.534	0.383	0.000107703	0	SLC4A4	corneal stroma
RARB	2.56e-21	0.446901	0.784	0.53	5.02e-17	0	RARB	corneal stroma
SLC25A26	1.16e-16	0.446442	0.7	0.49	2.28e-12	0	SLC25A26	corneal stroma
SMAD7	1.29e-19	0.446374	0.673	0.435	2.53e-15	0	SMAD7	corneal stroma
GLI3	3.9e-21	0.444588	0.834	0.578	7.65e-17	0	GLI3	corneal stroma
COL26A1	5.64e-19	0.443333	0.641	0.404	1.11e-14	0	COL26A1	corneal stroma
NFIC	6.48e-15	0.443211	0.717	0.575	1.27e-10	0	NFIC	corneal stroma
MEX3A	6.76e-15	0.443196	0.615	0.424	1.33e-10	0	MEX3A	corneal stroma
PDE3A	1.07e-20	0.442682	0.711	0.447	2.11e-16	0	PDE3A	corneal stroma
ELK3	3.14e-18	0.440887	0.569	0.345	6.15e-14	0	ELK3	corneal stroma
TACC1	1.74e-16	0.440779	0.72	0.494	3.41e-12	0	TACC1	corneal stroma
COL8A1	1.4e-12	0.440475	0.388	0.222	2.75e-08	0	COL8A1	corneal stroma
ZNF503	1.45e-16	0.440081	0.647	0.41	2.84e-12	0	ZNF503	corneal stroma
IGF1	4.5e-27	0.43936	0.423	0.172	8.83e-23	0	IGF1	corneal stroma
KIAA1462	1.21e-22	0.438626	0.499	0.249	2.38e-18	0	KIAA1462	corneal stroma
RAB3C	3.62e-23	0.438439	0.569	0.317	7.09e-19	0	RAB3C	corneal stroma
RAPGEF4	2.64e-15	0.438371	0.601	0.382	5.18e-11	0	RAPGEF4	corneal stroma
EXT2	1.87e-13	0.43824	0.536	0.359	3.67e-09	0	EXT2	corneal stroma
ZNF521	1.1e-18	0.435359	0.831	0.603	2.15e-14	0	ZNF521	corneal stroma
JAZF1	1.05e-14	0.435289	0.735	0.557	2.07e-10	0	JAZF1	corneal stroma
PAMR1	7.76e-13	0.435094	0.373	0.208	1.52e-08	0	PAMR1	corneal stroma
NHSL2	3.44e-14	0.435093	0.671	0.468	6.74e-10	0	NHSL2	corneal stroma
RASA3	1.37e-21	0.433375	0.816	0.562	2.68e-17	0	RASA3	corneal stroma
FMN2	1.79e-15	0.433033	0.647	0.45	3.52e-11	0	FMN2	corneal stroma
FBXL13	6.89e-18	0.432857	0.845	0.71	1.35e-13	0	FBXL13	corneal stroma
PRDM6	5.03e-19	0.432808	0.551	0.302	9.87e-15	0	PRDM6	corneal stroma
VTCN1	2.44e-10	0.432325	0.262	0.133	4.79e-06	0	VTCN1	corneal stroma
RNF150	2.37e-19	0.432002	0.711	0.459	4.64e-15	0	RNF150	corneal stroma
CELSR1	2.99e-05	0.43197	0.452	0.337	0.586376	0	CELSR1	corneal stroma
AKAP2	3.55e-18	0.431481	0.601	0.355	6.96e-14	0	AKAP2	corneal stroma
MERTK	1.78e-17	0.429406	0.671	0.466	3.49e-13	0	MERTK	corneal stroma
EXT1	1.69e-18	0.429387	0.834	0.582	3.3e-14	0	EXT1	corneal stroma
RBBP8	9.26e-08	0.428413	0.504	0.38	0.00181646	0	RBBP8	corneal stroma
CPED1	4.65e-21	0.427538	0.77	0.553	9.11e-17	0	CPED1	corneal stroma
ST5	6.65e-21	0.427537	0.854	0.634	1.3e-16	0	ST5	corneal stroma
KIAA1755	1.23e-17	0.42696	0.411	0.212	2.42e-13	0	KIAA1755	corneal stroma
COL24A1	1.86e-18	0.426154	0.612	0.377	3.65e-14	0	COL24A1	corneal stroma
TGFB2	3.88e-23	0.425856	0.644	0.364	7.6e-19	0	TGFB2	corneal stroma
MBNL2	1.02e-15	0.425334	0.726	0.517	2e-11	0	MBNL2	corneal stroma
ZNF423	8.58e-23	0.425038	0.959	0.695	1.68e-18	0	ZNF423	corneal stroma
MEF2C	1.11e-19	0.423991	0.612	0.367	2.18e-15	0	MEF2C	corneal stroma
SYNE2	1.14e-09	0.423953	0.563	0.406	2.23e-05	0	SYNE2	corneal stroma
ATP8A1	6.2e-07	0.423897	0.647	0.512	0.012165	0	ATP8A1	corneal stroma
COL1A2	1.04e-21	0.423676	0.58	0.308	2.04e-17	0	COL1A2	corneal stroma
COL6A6	1.15e-16	0.423607	0.431	0.232	2.26e-12	0	COL6A6	corneal stroma
TLN2	1.03e-13	0.422899	0.697	0.514	2.02e-09	0	TLN2	corneal stroma
BMPR1B	1.55e-13	0.422776	0.603	0.405	3.05e-09	0	BMPR1B	corneal stroma
SLC1A7	1.19e-13	0.421328	0.481	0.294	2.33e-09	0	SLC1A7	corneal stroma
FBLN1	1.3e-13	0.420536	0.615	0.404	2.55e-09	0	FBLN1	corneal stroma
FBLN5	1.13e-15	0.420334	0.496	0.284	2.22e-11	0	FBLN5	corneal stroma
RGL1	2.22e-16	0.420233	0.837	0.696	4.35e-12	0	RGL1	corneal stroma
CCBE1	3.52e-17	0.420069	0.685	0.44	6.9e-13	0	CCBE1	corneal stroma
PAM	6.21e-16	0.41998	0.647	0.438	1.22e-11	0	PAM	corneal stroma
RAI14	1.37e-14	0.419748	0.703	0.523	2.69e-10	0	RAI14	corneal stroma
HSD17B12	2.88e-14	0.419691	0.685	0.516	5.66e-10	0	HSD17B12	corneal stroma
AGMO	1.11e-08	0.417881	0.443	0.295	0.000218056	0	AGMO	corneal stroma
ADAMTS6	2.42e-16	0.417069	0.627	0.435	4.75e-12	0	ADAMTS6	corneal stroma
PLCE1	5.91e-16	0.417019	0.574	0.37	1.16e-11	0	PLCE1	corneal stroma
ATP6AP1L	1.16e-14	0.416533	0.586	0.399	2.28e-10	0	ATP6AP1L	corneal stroma
SVIL	3.04e-18	0.416479	0.796	0.534	5.96e-14	0	SVIL	corneal stroma
GAS2	1.97e-18	0.416138	0.65	0.415	3.85e-14	0	GAS2	corneal stroma
LNX1	1.17e-18	0.415831	0.598	0.354	2.29e-14	0	LNX1	corneal stroma
ARHGAP42	1.02e-11	0.415641	0.656	0.481	2.01e-07	0	ARHGAP42	corneal stroma
WNT5A	1.58e-22	0.41536	0.545	0.277	3.1e-18	0	WNT5A	corneal stroma
SMARCA2	1.1e-09	0.414301	0.77	0.604	2.15e-05	0	SMARCA2	corneal stroma
LTBP1	1.43e-16	0.414273	0.825	0.642	2.8e-12	0	LTBP1	corneal stroma
GATA6	1.8e-18	0.414256	0.362	0.169	3.54e-14	0	GATA6	corneal stroma
ADGRL1	7.22e-18	0.414173	0.738	0.519	1.42e-13	0	ADGRL1	corneal stroma
SLC12A8	1.52e-18	0.412868	0.598	0.368	2.98e-14	0	SLC12A8	corneal stroma
CCND2	7.37e-18	0.412829	0.697	0.434	1.44e-13	0	CCND2	corneal stroma
GLI2	5.08e-20	0.412682	0.886	0.592	9.97e-16	0	GLI2	corneal stroma
TUSC3	2.29e-07	0.412504	0.478	0.348	0.00449183	0	TUSC3	corneal stroma
PPM1H	7.78e-13	0.412222	0.697	0.508	1.53e-08	0	PPM1H	corneal stroma
TMEM108	1.54e-17	0.411713	0.618	0.397	3.02e-13	0	TMEM108	corneal stroma
GRIK4	5.96e-15	0.40999	0.778	0.555	1.17e-10	0	GRIK4	corneal stroma
CPVL	1.19e-17	0.409886	0.554	0.32	2.34e-13	0	CPVL	corneal stroma
IFT27	4.69e-14	0.409602	0.638	0.479	9.2e-10	0	IFT27	corneal stroma
CACHD1	6.65e-16	0.40937	0.691	0.463	1.3e-11	0	CACHD1	corneal stroma
OLFML3	1.29e-16	0.409253	0.487	0.276	2.53e-12	0	OLFML3	corneal stroma
CACNB4	8.46e-12	0.407703	0.601	0.414	1.66e-07	0	CACNB4	corneal stroma
COL4A1	5.63e-17	0.407512	0.641	0.398	1.1e-12	0	COL4A1	corneal stroma
WHRN	5.01e-15	0.40666	0.627	0.419	9.82e-11	0	WHRN	corneal stroma
TMEM212	1.48e-18	0.406371	0.44	0.227	2.9e-14	0	TMEM212	corneal stroma
EPHA3	4.83e-12	0.405996	0.603	0.42	9.47e-08	0	EPHA3	corneal stroma
KCNE4	3.81e-17	0.404872	0.446	0.238	7.47e-13	0	KCNE4	corneal stroma
COL23A1	1.39e-13	0.403915	0.808	0.662	2.73e-09	0	COL23A1	corneal stroma
PTPRQ	6.28e-17	0.403601	0.528	0.316	1.23e-12	0	PTPRQ	corneal stroma
FER1L6	1.72e-15	0.403521	0.563	0.349	3.37e-11	0	FER1L6	corneal stroma
ARHGAP26	5.9e-18	0.403214	0.837	0.658	1.16e-13	0	ARHGAP26	corneal stroma
C9orf92	7.29e-17	0.40317	0.364	0.176	1.43e-12	0	C9orf92	corneal stroma
MID1	1.83e-16	0.40273	0.659	0.428	3.58e-12	0	MID1	corneal stroma
ZNF827	6.61e-08	0.402576	0.647	0.495	0.00129555	0	ZNF827	corneal stroma
PHACTR2	2.47e-16	0.402504	0.641	0.426	4.83e-12	0	PHACTR2	corneal stroma
CDH8	7.71e-19	0.401589	0.481	0.259	1.51e-14	0	CDH8	corneal stroma
TP53RK	2.52e-16	0.401213	0.554	0.334	4.93e-12	0	TP53RK	corneal stroma
AKNAD1	1.15e-17	0.400513	0.443	0.237	2.26e-13	0	AKNAD1	corneal stroma
RGMB	1.22e-14	0.400332	0.668	0.443	2.4e-10	0	RGMB	corneal stroma
SNX7	4.8e-11	0.400106	0.367	0.211	9.42e-07	0	SNX7	corneal stroma
BTBD11	3.51e-17	0.399357	0.7	0.475	6.88e-13	0	BTBD11	corneal stroma
CNKSR3	7.63e-16	0.399227	0.638	0.41	1.5e-11	0	CNKSR3	corneal stroma
IL17RD	4.35e-16	0.398423	0.633	0.422	8.53e-12	0	IL17RD	corneal stroma
CCDC85A	5.13e-17	0.398378	0.566	0.351	1.01e-12	0	CCDC85A	corneal stroma
MN1	4.61e-22	0.39827	0.682	0.415	9.05e-18	0	MN1	corneal stroma
SMAD1	5.29e-10	0.398085	0.557	0.415	1.04e-05	0	SMAD1	corneal stroma
ARHGEF40	2.03e-16	0.397996	0.641	0.422	3.98e-12	0	ARHGEF40	corneal stroma
AMOTL1	2.85e-14	0.397967	0.621	0.429	5.59e-10	0	AMOTL1	corneal stroma
HECW2	7.37e-12	0.397751	0.618	0.45	1.44e-07	0	HECW2	corneal stroma
CSGALNACT1	7.22e-14	0.39759	0.612	0.404	1.42e-09	0	CSGALNACT1	corneal stroma
FLRT2	1.45e-15	0.397451	0.577	0.361	2.85e-11	0	FLRT2	corneal stroma
CLMN	1.61e-16	0.397443	0.627	0.398	3.15e-12	0	CLMN	corneal stroma
C9	1.52e-15	0.397365	0.455	0.253	2.98e-11	0	C9	corneal stroma
MYRFL	2.73e-10	0.397308	0.373	0.225	5.35e-06	0	MYRFL	corneal stroma
TBX3	4.44e-15	0.397214	0.397	0.211	8.71e-11	0	TBX3	corneal stroma
RBMS2	5.47e-14	0.397065	0.569	0.378	1.07e-09	0	RBMS2	corneal stroma
KCND2	2.82e-13	0.397049	0.571	0.385	5.54e-09	0	KCND2	corneal stroma
VPS53	4.54e-09	0.396633	0.571	0.455	8.9e-05	0	VPS53	corneal stroma
DDAH1	2.76e-15	0.396527	0.653	0.447	5.4e-11	0	DDAH1	corneal stroma
GXYLT2	4.94e-14	0.396298	0.764	0.618	9.68e-10	0	GXYLT2	corneal stroma
SPARC	7.05e-19	0.3961	0.598	0.353	1.38e-14	0	SPARC	corneal stroma
SLC1A2	7.13e-16	0.395674	0.58	0.366	1.4e-11	0	SLC1A2	corneal stroma
TEX14	1.06e-14	0.39514	0.72	0.53	2.07e-10	0	TEX14	corneal stroma
MCC	4.69e-14	0.394936	0.799	0.61	9.19e-10	0	MCC	corneal stroma
KANK1	7.13e-14	0.394695	0.682	0.48	1.4e-09	0	KANK1	corneal stroma
PRSS12	5.86e-14	0.394603	0.455	0.267	1.15e-09	0	PRSS12	corneal stroma
SORL1	9.96e-18	0.394577	0.504	0.284	1.95e-13	0	SORL1	corneal stroma
ARHGEF10	2.41e-16	0.394561	0.703	0.486	4.72e-12	0	ARHGEF10	corneal stroma
NEDD9	7.36e-20	0.39401	0.691	0.433	1.44e-15	0	NEDD9	corneal stroma
EPHB3	8.4e-18	0.393703	0.793	0.547	1.65e-13	0	EPHB3	corneal stroma
C1orf21	4.17e-13	0.39354	0.711	0.556	8.18e-09	0	C1orf21	corneal stroma
DIRC3	2.67e-15	0.392423	0.778	0.543	5.24e-11	0	DIRC3	corneal stroma
LSP1	1.25e-13	0.391559	0.493	0.304	2.45e-09	0	LSP1	corneal stroma
ACTN1	4.87e-12	0.391371	0.638	0.455	9.54e-08	0	ACTN1	corneal stroma
CGNL1	1.86e-15	0.391265	0.563	0.346	3.65e-11	0	CGNL1	corneal stroma
VEPH1	2.73e-17	0.390667	0.598	0.38	5.35e-13	0	VEPH1	corneal stroma
COL19A1	2.63e-08	0.390633	0.464	0.315	0.000515443	0	COL19A1	corneal stroma
ANO6	6.51e-16	0.390592	0.627	0.429	1.28e-11	0	ANO6	corneal stroma
COL6A3	2.74e-19	0.390395	0.461	0.231	5.37e-15	0	COL6A3	corneal stroma
S1PR2	1.49e-18	0.39004	0.516	0.286	2.92e-14	0	S1PR2	corneal stroma
RP1-27O5.3	3.81e-14	0.38963	0.51	0.328	7.48e-10	0	RP1-27O5.3	corneal stroma
LDLRAD3	5.64e-13	0.389613	0.711	0.512	1.11e-08	0	LDLRAD3	corneal stroma
TWIST2	1.96e-17	0.389536	0.531	0.3	3.85e-13	0	TWIST2	corneal stroma
PID1	7.28e-17	0.389476	0.641	0.41	1.43e-12	0	PID1	corneal stroma
GRK3	5.31e-14	0.388904	0.536	0.345	1.04e-09	0	GRK3	corneal stroma
FAM129A	1.44e-13	0.388362	0.472	0.289	2.82e-09	0	FAM129A	corneal stroma
SHROOM3	1.04e-17	0.388119	0.778	0.525	2.03e-13	0	SHROOM3	corneal stroma
PDGFRA	1.48e-19	0.386828	0.621	0.355	2.9e-15	0	PDGFRA	corneal stroma
AIG1	8.63e-12	0.385711	0.615	0.447	1.69e-07	0	AIG1	corneal stroma
ABL1	1.76e-12	0.384934	0.805	0.714	3.46e-08	0	ABL1	corneal stroma
KCTD12	3.11e-11	0.384532	0.469	0.295	6.09e-07	0	KCTD12	corneal stroma
LRRC17	6.86e-20	0.384119	0.423	0.202	1.34e-15	0	LRRC17	corneal stroma
ARHGEF26	3.79e-10	0.383881	0.504	0.345	7.43e-06	0	ARHGEF26	corneal stroma
LIMCH1	8.45e-15	0.383833	0.708	0.486	1.66e-10	0	LIMCH1	corneal stroma
PPFIBP1	1.65e-13	0.383818	0.656	0.455	3.23e-09	0	PPFIBP1	corneal stroma
CLDN14	1.49e-12	0.383727	0.327	0.175	2.91e-08	0	CLDN14	corneal stroma
LRIG1	1.36e-17	0.383601	0.84	0.63	2.66e-13	0	LRIG1	corneal stroma
COL4A2	1.24e-17	0.382841	0.761	0.516	2.44e-13	0	COL4A2	corneal stroma
LRRIQ1	9.97e-15	0.381998	0.417	0.234	1.95e-10	0	LRRIQ1	corneal stroma
ZNF106	2.16e-15	0.381866	0.618	0.419	4.24e-11	0	ZNF106	corneal stroma
ACOXL	1.11e-08	0.381563	0.603	0.464	0.000218042	0	ACOXL	corneal stroma
SAMD3	1.99e-06	0.381398	0.449	0.333	0.0390786	0	SAMD3	corneal stroma
TRABD2B	1.42e-18	0.381141	0.708	0.449	2.79e-14	0	TRABD2B	corneal stroma
MATN2	1.6e-16	0.381067	0.606	0.391	3.13e-12	0	MATN2	corneal stroma
PLXDC2	1.69e-11	0.380854	0.703	0.506	3.32e-07	0	PLXDC2	corneal stroma
SEMA3C	5.97e-15	0.380849	0.557	0.351	1.17e-10	0	SEMA3C	corneal stroma
HEXB	1.95e-13	0.38056	0.571	0.374	3.82e-09	0	HEXB	corneal stroma
LRRN1	1.25e-06	0.380504	0.379	0.257	0.0246032	0	LRRN1	corneal stroma
CTD-2535L24.2	4.9e-15	0.379662	0.63	0.41	9.62e-11	0	CTD-2535L24.2	corneal stroma
APP	1.55e-12	0.379639	0.641	0.455	3.03e-08	0	APP	corneal stroma
DISC1	7.44e-16	0.379625	0.749	0.528	1.46e-11	0	DISC1	corneal stroma
STK39	1.44e-14	0.379582	0.665	0.454	2.82e-10	0	STK39	corneal stroma
BASP1	5.82e-16	0.378693	0.738	0.489	1.14e-11	0	BASP1	corneal stroma
ADAMTS12	3.67e-13	0.378657	0.56	0.366	7.19e-09	0	ADAMTS12	corneal stroma
SLC25A21	1.7e-11	0.377928	0.601	0.442	3.33e-07	0	SLC25A21	corneal stroma
NOVA1	2.23e-07	0.377689	0.551	0.425	0.00438089	0	NOVA1	corneal stroma
PITPNC1	2.1e-13	0.377128	0.761	0.601	4.11e-09	0	PITPNC1	corneal stroma
MEOX1	3.35e-20	0.37711	0.359	0.153	6.57e-16	0	MEOX1	corneal stroma
L3MBTL4	1.64e-13	0.377065	0.569	0.371	3.22e-09	0	L3MBTL4	corneal stroma
DSEL	1.94e-10	0.377018	0.557	0.408	3.8e-06	0	DSEL	corneal stroma
KCNIP1	4.09e-14	0.376845	0.726	0.502	8.03e-10	0	KCNIP1	corneal stroma
INHBA	4.63e-16	0.376567	0.329	0.158	9.08e-12	0	INHBA	corneal stroma
SH3RF3	3.45e-15	0.376258	0.808	0.563	6.77e-11	0	SH3RF3	corneal stroma
EFHD1	2.68e-10	0.375754	0.469	0.324	5.25e-06	0	EFHD1	corneal stroma
RP11-385J1.3	5.02e-11	0.375555	0.545	0.379	9.83e-07	0	RP11-385J1.3	corneal stroma
CPXM2	5.5e-15	0.375393	0.469	0.275	1.08e-10	0	CPXM2	corneal stroma
KCTD1	3.02e-16	0.375074	0.627	0.404	5.92e-12	0	KCTD1	corneal stroma
SLC16A7	1.32e-12	0.374966	0.548	0.363	2.58e-08	0	SLC16A7	corneal stroma
YLPM1	8.07e-13	0.37451	0.63	0.466	1.58e-08	0	YLPM1	corneal stroma
TIMP3	1.73e-11	0.374495	0.431	0.269	3.38e-07	0	TIMP3	corneal stroma
RP11-302B13.5	2.25e-13	0.374371	0.63	0.455	4.41e-09	0	RP11-302B13.5	corneal stroma
SLA	8.69e-16	0.374353	0.499	0.289	1.7e-11	0	SLA	corneal stroma
TRAF3	2.65e-12	0.374013	0.496	0.324	5.19e-08	0	TRAF3	corneal stroma
VMP1	2.08e-10	0.373402	0.682	0.568	4.07e-06	0	VMP1	corneal stroma
DCLK2	1.97e-15	0.373197	0.633	0.417	3.86e-11	0	DCLK2	corneal stroma
DCHS1	1.09e-12	0.372994	0.539	0.361	2.14e-08	0	DCHS1	corneal stroma
EFNA5	3.34e-15	0.372898	0.831	0.578	6.55e-11	0	EFNA5	corneal stroma
EMP1	5.86e-16	0.372272	0.35	0.167	1.15e-11	0	EMP1	corneal stroma
SCFD2	1.06e-20	0.372131	0.813	0.568	2.09e-16	0	SCFD2	corneal stroma
LMX1B	1.1e-10	0.371962	0.499	0.323	2.17e-06	0	LMX1B	corneal stroma
IKZF2	6.06e-12	0.371367	0.516	0.33	1.19e-07	0	IKZF2	corneal stroma
RAB11FIP5	6.98e-12	0.371214	0.58	0.416	1.37e-07	0	RAB11FIP5	corneal stroma
CACNA1D	5.56e-10	0.371201	0.755	0.644	1.09e-05	0	CACNA1D	corneal stroma
ST6GAL2	9.71e-15	0.371151	0.434	0.242	1.9e-10	0	ST6GAL2	corneal stroma
SLC6A2	1.41e-14	0.370825	0.417	0.226	2.76e-10	0	SLC6A2	corneal stroma
RHOJ	6.19e-20	0.370813	0.475	0.243	1.21e-15	0	RHOJ	corneal stroma
DACT1	2.79e-19	0.370647	0.51	0.273	5.47e-15	0	DACT1	corneal stroma
ADAM19	8.27e-13	0.370462	0.58	0.39	1.62e-08	0	ADAM19	corneal stroma
NR4A1	6.48e-18	0.370308	0.872	0.679	1.27e-13	0	NR4A1	corneal stroma
C4orf51	2.68e-12	0.369924	0.601	0.424	5.26e-08	0	C4orf51	corneal stroma
NTF3	2.3e-11	0.369218	0.44	0.276	4.52e-07	0	NTF3	corneal stroma
HS3ST3A1	1.02e-11	0.368807	0.411	0.25	1.99e-07	0	HS3ST3A1	corneal stroma
ETS2	1.16e-15	0.367478	0.452	0.253	2.27e-11	0	ETS2	corneal stroma
CYFIP2	8.31e-11	0.367264	0.545	0.391	1.63e-06	0	CYFIP2	corneal stroma
SLC35F3	4.18e-05	0.367034	0.49	0.384	0.819903	0	SLC35F3	corneal stroma
ERCC4	9.09e-12	0.367032	0.499	0.33	1.78e-07	0	ERCC4	corneal stroma
AHNAK	1.13e-13	0.366965	0.764	0.572	2.21e-09	0	AHNAK	corneal stroma
SDC2	1.04e-15	0.3668	0.633	0.407	2.03e-11	0	SDC2	corneal stroma
TSPAN8	1.24e-07	0.366697	0.475	0.351	0.00243642	0	TSPAN8	corneal stroma
SULT1B1	1.95e-15	0.366673	0.347	0.164	3.81e-11	0	SULT1B1	corneal stroma
TIAM2	7.25e-14	0.366078	0.743	0.566	1.42e-09	0	TIAM2	corneal stroma
MYO1B	4.25e-10	0.365928	0.548	0.39	8.32e-06	0	MYO1B	corneal stroma
NELL2	7.69e-14	0.36497	0.665	0.448	1.51e-09	0	NELL2	corneal stroma
KLF12	1.36e-12	0.364719	0.595	0.413	2.66e-08	0	KLF12	corneal stroma
DOK6	1.45e-11	0.364685	0.574	0.394	2.85e-07	0	DOK6	corneal stroma
DNER	3.08e-09	0.363547	0.58	0.42	6.04e-05	0	DNER	corneal stroma
TMTC1	6.72e-12	0.363349	0.586	0.399	1.32e-07	0	TMTC1	corneal stroma
RNLS	2.95e-14	0.362851	0.487	0.297	5.79e-10	0	RNLS	corneal stroma
IL15	1.59e-14	0.361559	0.294	0.135	3.12e-10	0	IL15	corneal stroma
HOXB3	1.25e-08	0.361499	0.297	0.167	0.000244975	0	HOXB3	corneal stroma
SETBP1	2.57e-13	0.361166	0.843	0.603	5.04e-09	0	SETBP1	corneal stroma
DYSF	9.24e-07	0.360408	0.601	0.479	0.0181147	0	DYSF	corneal stroma
ANGPTL2	1.07e-13	0.360219	0.481	0.291	2.09e-09	0	ANGPTL2	corneal stroma
EFCAB6	8.26e-07	0.360163	0.496	0.382	0.0161862	0	EFCAB6	corneal stroma
WDFY3	6.55e-09	0.359705	0.603	0.457	0.000128405	0	WDFY3	corneal stroma
LINC00371	1.63e-08	0.359573	0.277	0.16	0.000319403	0	LINC00371	corneal stroma
CRYL1	1.39e-12	0.359518	0.49	0.307	2.72e-08	0	CRYL1	corneal stroma
BCL11B	3.51e-14	0.359512	0.63	0.41	6.87e-10	0	BCL11B	corneal stroma
MAD1L1	3.34e-08	0.359381	0.895	0.762	0.0006555	0	MAD1L1	corneal stroma
FAM81A	7.63e-12	0.359286	0.507	0.327	1.5e-07	0	FAM81A	corneal stroma
HIVEP2	8.9e-15	0.359193	0.732	0.511	1.74e-10	0	HIVEP2	corneal stroma
PDGFD	3.49e-12	0.358993	0.487	0.307	6.85e-08	0	PDGFD	corneal stroma
FLT1	5.51e-15	0.358745	0.516	0.308	1.08e-10	0	FLT1	corneal stroma
CSRP2	3.82e-14	0.358501	0.58	0.379	7.48e-10	0	CSRP2	corneal stroma
KCNK1	3.76e-17	0.358366	0.367	0.177	7.36e-13	0	KCNK1	corneal stroma
ME1	1.67e-10	0.358294	0.429	0.275	3.27e-06	0	ME1	corneal stroma
EPHB2	1.17e-11	0.358193	0.682	0.487	2.3e-07	0	EPHB2	corneal stroma
DGKI	8.83e-09	0.357511	0.571	0.414	0.00017313	0	DGKI	corneal stroma
WDR27	1.05e-06	0.35656	0.7	0.591	0.0206604	0	WDR27	corneal stroma
PCDHGA2	1.06e-11	0.355766	0.714	0.543	2.08e-07	0	PCDHGA2	corneal stroma
LIPA	5.62e-14	0.355548	0.676	0.46	1.1e-09	0	LIPA	corneal stroma
TSHZ3	1.33e-13	0.355515	0.519	0.32	2.61e-09	0	TSHZ3	corneal stroma
ZPLD1	3.37e-09	0.355325	0.446	0.304	6.6e-05	0	ZPLD1	corneal stroma
2010-03-01	9.34e-08	0.35465	0.452	0.32	0.00183081	0	2010-03-01	corneal stroma
LRP6	6.15e-12	0.353913	0.647	0.49	1.21e-07	0	LRP6	corneal stroma
SLC38A6	3.97e-07	0.353857	0.478	0.359	0.0077927	0	SLC38A6	corneal stroma
HFE2	3.31e-13	0.353628	0.472	0.282	6.49e-09	0	HFE2	corneal stroma
IL18R1	1.33e-06	0.353385	0.213	0.119	0.0260551	0	IL18R1	corneal stroma
PCDHGA3	6.59e-12	0.353368	0.714	0.538	1.29e-07	0	PCDHGA3	corneal stroma
MDFI	1.52e-18	0.353248	0.423	0.209	2.98e-14	0	MDFI	corneal stroma
CD109	6.03e-15	0.35306	0.449	0.253	1.18e-10	0	CD109	corneal stroma
MMP21	4.36e-15	0.352575	0.3	0.138	8.55e-11	0	MMP21	corneal stroma
SIX1	5.21e-14	0.352171	0.426	0.24	1.02e-09	0	SIX1	corneal stroma
ADCY8	9.37e-09	0.352021	0.431	0.282	0.00018366	0	ADCY8	corneal stroma
PCDHGA4	5.35e-12	0.35178	0.708	0.529	1.05e-07	0	PCDHGA4	corneal stroma
PMP22	5.99e-14	0.350873	0.455	0.26	1.17e-09	0	PMP22	corneal stroma
FRMD5	8.69e-12	0.350785	0.566	0.384	1.7e-07	0	FRMD5	corneal stroma
ACVR1	5.62e-13	0.350425	0.641	0.445	1.1e-08	0	ACVR1	corneal stroma
PDZD2	2.65e-14	0.350119	0.793	0.588	5.19e-10	0	PDZD2	corneal stroma
PCDHGA5	4.98e-12	0.349906	0.706	0.525	9.76e-08	0	PCDHGA5	corneal stroma
PCDHGB2	4.21e-12	0.349681	0.708	0.526	8.25e-08	0	PCDHGB2	corneal stroma
EPHB4	7.97e-14	0.349628	0.501	0.304	1.56e-09	0	EPHB4	corneal stroma
ADAMTS17	1.54e-12	0.349327	0.726	0.551	3.02e-08	0	ADAMTS17	corneal stroma
OGN	2.98e-30	0.349277	0.239	0.055	5.85e-26	0	OGN	corneal stroma
WDR89	1.83e-11	0.349151	0.755	0.615	3.59e-07	0	WDR89	corneal stroma
PCDHGB1	1.48e-11	0.34911	0.708	0.533	2.9e-07	0	PCDHGB1	corneal stroma
TRIM5	1.07e-05	0.348998	0.373	0.269	0.210247	0	TRIM5	corneal stroma
SCARA3	1.61e-11	0.348624	0.382	0.225	3.16e-07	0	SCARA3	corneal stroma
AEBP2	1.11e-13	0.348187	0.784	0.664	2.18e-09	0	AEBP2	corneal stroma
PLEKHA5	1.47e-10	0.34808	0.598	0.432	2.89e-06	0	PLEKHA5	corneal stroma
RPS6KA2	7.85e-15	0.347888	0.904	0.77	1.54e-10	0	RPS6KA2	corneal stroma
SEMA5B	5.95e-07	0.347034	0.542	0.39	0.011661	0	SEMA5B	corneal stroma
COL21A1	7.42e-14	0.346964	0.662	0.448	1.45e-09	0	COL21A1	corneal stroma
TNS3	9.33e-16	0.346389	0.883	0.616	1.83e-11	0	TNS3	corneal stroma
ADAMTS16	1.43e-09	0.346269	0.332	0.19	2.8e-05	0	ADAMTS16	corneal stroma
SH3BP4	2.17e-09	0.346118	0.644	0.497	4.25e-05	0	SH3BP4	corneal stroma
PRR5L	2.03e-10	0.346099	0.539	0.371	3.99e-06	0	PRR5L	corneal stroma
PCDHGA1	2.43e-11	0.345888	0.714	0.545	4.77e-07	0	PCDHGA1	corneal stroma
MMP14	9.99e-15	0.345839	0.501	0.292	1.96e-10	0	MMP14	corneal stroma
THADA	3.33e-18	0.345753	0.834	0.64	6.52e-14	0	THADA	corneal stroma
THBS2	7.95e-19	0.345714	0.356	0.156	1.56e-14	0	THBS2	corneal stroma
ESRRB	5.54e-10	0.345491	0.499	0.339	1.09e-05	0	ESRRB	corneal stroma
SRGAP3	2.46e-16	0.345425	0.851	0.64	4.82e-12	0	SRGAP3	corneal stroma
OSTF1	9.24e-08	0.345348	0.499	0.372	0.00181186	0	OSTF1	corneal stroma
ZNF474	3.13e-15	0.345104	0.259	0.111	6.15e-11	0	ZNF474	corneal stroma
PCDHGC3	4.55e-14	0.344968	0.671	0.46	8.92e-10	0	PCDHGC3	corneal stroma
SVEP1	1.58e-11	0.344766	0.446	0.276	3.09e-07	0	SVEP1	corneal stroma
CCDC80	2.31e-13	0.344257	0.464	0.277	4.52e-09	0	CCDC80	corneal stroma
ATP8B4	5.18e-14	0.344103	0.554	0.351	1.02e-09	0	ATP8B4	corneal stroma
GPC3	5.76e-18	0.344003	0.659	0.397	1.13e-13	0	GPC3	corneal stroma
BFSP1	3.64e-12	0.343762	0.671	0.494	7.14e-08	0	BFSP1	corneal stroma
P3H4	1.6e-11	0.343734	0.443	0.277	3.14e-07	0	P3H4	corneal stroma
TPM4	2.86e-14	0.343433	0.525	0.313	5.61e-10	0	TPM4	corneal stroma
EPHA7	6.43e-15	0.342652	0.673	0.451	1.26e-10	0	EPHA7	corneal stroma
ACTA2	1.18e-16	0.342586	0.394	0.2	2.31e-12	0	ACTA2	corneal stroma
HAS2	4.76e-11	0.342352	0.42	0.256	9.34e-07	0	HAS2	corneal stroma
EGFLAM	4.42e-11	0.342327	0.478	0.308	8.67e-07	0	EGFLAM	corneal stroma
RP3-468K18.5	3.54e-10	0.342291	0.551	0.387	6.93e-06	0	RP3-468K18.5	corneal stroma
TSHZ1	1.23e-11	0.342162	0.516	0.337	2.41e-07	0	TSHZ1	corneal stroma
TTC27	7.64e-14	0.341774	0.601	0.405	1.5e-09	0	TTC27	corneal stroma
PCDHGB4	1.48e-11	0.341756	0.694	0.518	2.9e-07	0	PCDHGB4	corneal stroma
WLS	4.97e-13	0.341507	0.589	0.381	9.75e-09	0	WLS	corneal stroma
AMPD3	2.33e-07	0.341256	0.653	0.549	0.00457057	0	AMPD3	corneal stroma
VANGL2	2.81e-14	0.341229	0.513	0.309	5.51e-10	0	VANGL2	corneal stroma
WIPF1	4.63e-16	0.341023	0.583	0.36	9.08e-12	0	WIPF1	corneal stroma
FN1	1.37e-14	0.340601	0.542	0.331	2.69e-10	0	FN1	corneal stroma
OSBPL1A	1.37e-12	0.340502	0.595	0.409	2.68e-08	0	OSBPL1A	corneal stroma
IL16	2.65e-15	0.34048	0.481	0.269	5.2e-11	0	IL16	corneal stroma
ARHGAP20	7.58e-19	0.340444	0.487	0.266	1.49e-14	0	ARHGAP20	corneal stroma
TRIM2	2.44e-14	0.340442	0.691	0.481	4.79e-10	0	TRIM2	corneal stroma
ZNF462	1.12e-05	0.34024	0.408	0.294	0.219908	0	ZNF462	corneal stroma
KIF25	4.77e-13	0.339925	0.321	0.164	9.35e-09	0	KIF25	corneal stroma
CYTH4	9.86e-16	0.339747	0.28	0.118	1.93e-11	0	CYTH4	corneal stroma
DHRS3	2.36e-15	0.339691	0.571	0.353	4.63e-11	0	DHRS3	corneal stroma
PCDHGA7	1.08e-11	0.339464	0.7	0.52	2.11e-07	0	PCDHGA7	corneal stroma
DZIP1L	1.72e-08	0.33937	0.309	0.184	0.000337909	0	DZIP1L	corneal stroma
HYKK	5.25e-13	0.33923	0.484	0.306	1.03e-08	0	HYKK	corneal stroma
RERG	1.29e-10	0.339142	0.49	0.321	2.54e-06	0	RERG	corneal stroma
WDR41	2.55e-06	0.338834	0.437	0.313	0.050062	0	WDR41	corneal stroma
KDELC2	1.07e-15	0.338624	0.461	0.26	2.09e-11	0	KDELC2	corneal stroma
PCDHGA9	6.68e-12	0.338263	0.691	0.511	1.31e-07	0	PCDHGA9	corneal stroma
ESR2	4.32e-09	0.338168	0.621	0.473	8.47e-05	0	ESR2	corneal stroma
PCDHGA6	1.56e-11	0.337928	0.7	0.524	3.07e-07	0	PCDHGA6	corneal stroma
ARHGAP10	5.35e-16	0.337551	0.752	0.512	1.05e-11	0	ARHGAP10	corneal stroma
PARP4	8.96e-12	0.337219	0.318	0.169	1.76e-07	0	PARP4	corneal stroma
CFAP161	4.62e-11	0.33613	0.434	0.27	9.07e-07	0	CFAP161	corneal stroma
SAMD12	1.2e-12	0.335922	0.621	0.418	2.36e-08	0	SAMD12	corneal stroma
C5orf38	1.38e-14	0.33585	0.44	0.244	2.71e-10	0	C5orf38	corneal stroma
PCDHGA12	5.79e-13	0.335808	0.676	0.477	1.13e-08	0	PCDHGA12	corneal stroma
PCDHGB6	4.66e-12	0.335799	0.688	0.507	9.15e-08	0	PCDHGB6	corneal stroma
FGF1	0.000167976	0.335777	0.329	0.239	1	0	FGF1	corneal stroma
RSPH4A	3.79e-15	0.335201	0.399	0.215	7.44e-11	0	RSPH4A	corneal stroma
PCDHGB3	2.41e-11	0.335023	0.7	0.525	4.72e-07	0	PCDHGB3	corneal stroma
CAPS2	2.14e-14	0.334945	0.487	0.295	4.19e-10	0	CAPS2	corneal stroma
PCDHGB5	8.96e-12	0.334782	0.694	0.514	1.76e-07	0	PCDHGB5	corneal stroma
DAAM2	1.5e-09	0.334651	0.437	0.283	2.95e-05	0	DAAM2	corneal stroma
CROCC	5.94e-14	0.334616	0.872	0.719	1.16e-09	0	CROCC	corneal stroma
ASB13	3.23e-11	0.334537	0.364	0.208	6.34e-07	0	ASB13	corneal stroma
ATP10A	3.61e-09	0.334502	0.519	0.351	7.08e-05	0	ATP10A	corneal stroma
WDR63	3.23e-14	0.334474	0.513	0.319	6.33e-10	0	WDR63	corneal stroma
PTN	3.03e-10	0.333906	0.321	0.181	5.93e-06	0	PTN	corneal stroma
PCDHGA8	1.59e-11	0.333391	0.694	0.518	3.11e-07	0	PCDHGA8	corneal stroma
KIF7	4.21e-11	0.333364	0.3	0.159	8.25e-07	0	KIF7	corneal stroma
SLC26A7	4.81e-07	0.333325	0.353	0.233	0.00942377	0	SLC26A7	corneal stroma
ZNF516	1.28e-11	0.333198	0.749	0.527	2.5e-07	0	ZNF516	corneal stroma
NID1	3.9e-11	0.333183	0.475	0.3	7.65e-07	0	NID1	corneal stroma
LRRTM3	9.62e-16	0.332255	0.405	0.215	1.89e-11	0	LRRTM3	corneal stroma
TMEM74	1e-10	0.332138	0.385	0.233	1.97e-06	0	TMEM74	corneal stroma
TRMT44	1.59e-07	0.331829	0.431	0.305	0.00311087	0	TRMT44	corneal stroma
PCDHGB7	1.63e-12	0.331374	0.685	0.493	3.2e-08	0	PCDHGB7	corneal stroma
NEBL	3.54e-13	0.331354	0.589	0.388	6.93e-09	0	NEBL	corneal stroma
DISP1	9.76e-15	0.331246	0.376	0.198	1.91e-10	0	DISP1	corneal stroma
PCDHGA11	1.86e-12	0.331158	0.679	0.487	3.65e-08	0	PCDHGA11	corneal stroma
GORAB	7.92e-17	0.330968	0.332	0.151	1.55e-12	0	GORAB	corneal stroma
RPL37A	1.62e-09	0.330684	0.542	0.404	3.19e-05	0	RPL37A	corneal stroma
CHSY3	5.79e-15	0.330642	0.536	0.335	1.14e-10	0	CHSY3	corneal stroma
NMRK1	4.36e-09	0.329951	0.51	0.368	8.56e-05	0	NMRK1	corneal stroma
C1QTNF3-AMACR	5.1e-07	0.329813	0.525	0.404	0.00999541	0	C1QTNF3-AMACR	corneal stroma
FKBP10	1.31e-10	0.329563	0.437	0.281	2.56e-06	0	FKBP10	corneal stroma
UVRAG	3.78e-07	0.32917	0.77	0.721	0.00740941	0	UVRAG	corneal stroma
KCNC1	1.2e-10	0.329035	0.373	0.22	2.36e-06	0	KCNC1	corneal stroma
PCDHGA10	4.54e-12	0.329009	0.685	0.497	8.9e-08	0	PCDHGA10	corneal stroma
SPATS2	9.76e-10	0.32889	0.571	0.413	1.91e-05	0	SPATS2	corneal stroma
THRB	1.37e-06	0.328664	0.589	0.455	0.026785	0	THRB	corneal stroma
FAM171A1	6.42e-12	0.328163	0.592	0.393	1.26e-07	0	FAM171A1	corneal stroma
ADCY2	2.47e-07	0.328099	0.496	0.366	0.00483921	0	ADCY2	corneal stroma
OPHN1	1.1e-08	0.328099	0.431	0.285	0.00021498	0	OPHN1	corneal stroma
CRLF2	2.45e-19	0.327939	0.329	0.139	4.81e-15	0	CRLF2	corneal stroma
NCS1	2.39e-06	0.327484	0.499	0.364	0.0467777	0	NCS1	corneal stroma
MGAT5	1.02e-12	0.32696	0.682	0.489	1.99e-08	0	MGAT5	corneal stroma
EPS8	2.18e-08	0.326566	0.735	0.64	0.000427416	0	EPS8	corneal stroma
CLUAP1	3.49e-11	0.326441	0.443	0.284	6.85e-07	0	CLUAP1	corneal stroma
AMOT	1.66e-10	0.326414	0.522	0.354	3.26e-06	0	AMOT	corneal stroma
APBB2	2.42e-15	0.32558	0.816	0.551	4.75e-11	0	APBB2	corneal stroma
CACNA1G	9.89e-14	0.325317	0.767	0.542	1.94e-09	0	CACNA1G	corneal stroma
ZNF471	1.93e-09	0.325278	0.548	0.418	3.78e-05	0	ZNF471	corneal stroma
STXBP6	2.27e-14	0.325132	0.534	0.329	4.45e-10	0	STXBP6	corneal stroma
TNN	5.71e-13	0.325077	0.37	0.2	1.12e-08	0	TNN	corneal stroma
EMX2	2.87e-13	0.32477	0.431	0.244	5.63e-09	0	EMX2	corneal stroma
IRX2	8.92e-14	0.324126	0.437	0.247	1.75e-09	0	IRX2	corneal stroma
RP11-302M6.4	1.51e-09	0.323537	0.741	0.612	2.97e-05	0	RP11-302M6.4	corneal stroma
TWIST1	3.84e-16	0.323384	0.563	0.326	7.53e-12	0	TWIST1	corneal stroma
CPLX2	5.63e-13	0.323162	0.507	0.315	1.1e-08	0	CPLX2	corneal stroma
MPPED1	1.02e-13	0.323157	0.411	0.235	2e-09	0	MPPED1	corneal stroma
GUCY1B3	2.01e-10	0.322803	0.455	0.301	3.94e-06	0	GUCY1B3	corneal stroma
FRAS1	1.16e-15	0.322715	0.738	0.502	2.27e-11	0	FRAS1	corneal stroma
SNCAIP	2.21e-10	0.322167	0.507	0.346	4.34e-06	0	SNCAIP	corneal stroma
STAMBPL1	6.7e-11	0.321798	0.475	0.304	1.31e-06	0	STAMBPL1	corneal stroma
TNS1	3.43e-11	0.320862	0.854	0.678	6.72e-07	0	TNS1	corneal stroma
PXDNL	1.11e-08	0.320842	0.493	0.354	0.000217916	0	PXDNL	corneal stroma
EDNRA	3.62e-19	0.320709	0.411	0.189	7.09e-15	0	EDNRA	corneal stroma
FAM149A	6e-07	0.32049	0.37	0.244	0.0117717	0	FAM149A	corneal stroma
FHL2	4.5e-12	0.320466	0.49	0.316	8.82e-08	0	FHL2	corneal stroma
SPTBN1	6.16e-12	0.320232	0.781	0.579	1.21e-07	0	SPTBN1	corneal stroma
COL5A2	6.56e-11	0.320213	0.487	0.309	1.29e-06	0	COL5A2	corneal stroma
CYP39A1	6.39e-12	0.320156	0.408	0.244	1.25e-07	0	CYP39A1	corneal stroma
EBF3	6.12e-14	0.319476	0.694	0.453	1.2e-09	0	EBF3	corneal stroma
PDGFRL	2.25e-12	0.319361	0.484	0.303	4.42e-08	0	PDGFRL	corneal stroma
METTL13	1.04e-10	0.319082	0.671	0.514	2.04e-06	0	METTL13	corneal stroma
FAM20A	6.68e-10	0.319076	0.379	0.235	1.31e-05	0	FAM20A	corneal stroma
ENPEP	2.24e-09	0.319065	0.455	0.296	4.38e-05	0	ENPEP	corneal stroma
ALG8	7.03e-11	0.318971	0.408	0.253	1.38e-06	0	ALG8	corneal stroma
GNAQ	8.44e-09	0.318796	0.706	0.566	0.000165437	0	GNAQ	corneal stroma
ZNF98	1.04e-12	0.318609	0.376	0.201	2.03e-08	0	ZNF98	corneal stroma
CPNE8	1.48e-12	0.318498	0.464	0.286	2.9e-08	0	CPNE8	corneal stroma
SLCO5A1	5.81e-10	0.31827	0.44	0.281	1.14e-05	0	SLCO5A1	corneal stroma
C16orf62	1.4e-06	0.318055	0.679	0.603	0.0273758	0	C16orf62	corneal stroma
PSAT1	1.29e-11	0.317824	0.426	0.254	2.53e-07	0	PSAT1	corneal stroma
WNT7B	4.19e-11	0.317694	0.382	0.219	8.22e-07	0	WNT7B	corneal stroma
2001-12-01	9.15e-14	0.317643	0.507	0.304	1.79e-09	0	2001-12-01	corneal stroma
AXIN2	6.48e-11	0.31722	0.569	0.381	1.27e-06	0	AXIN2	corneal stroma
GRIN2A	2.85e-10	0.317142	0.478	0.31	5.59e-06	0	GRIN2A	corneal stroma
ENC1	2.02e-10	0.317064	0.446	0.28	3.96e-06	0	ENC1	corneal stroma
SOBP	8.49e-13	0.31647	0.673	0.467	1.67e-08	0	SOBP	corneal stroma
BCL2	2.9e-13	0.316395	0.723	0.514	5.68e-09	0	BCL2	corneal stroma
PDPN	2.24e-14	0.316267	0.289	0.133	4.39e-10	0	PDPN	corneal stroma
SAMD13	6.22e-13	0.316262	0.385	0.22	1.22e-08	0	SAMD13	corneal stroma
CAPZB	8.07e-08	0.3162	0.81	0.73	0.00158306	0	CAPZB	corneal stroma
SPIDR	2.15e-09	0.316114	0.77	0.655	4.21e-05	0	SPIDR	corneal stroma
ZBED9	6.24e-13	0.315852	0.388	0.221	1.22e-08	0	ZBED9	corneal stroma
WWC1	2.15e-08	0.315645	0.499	0.341	0.000421864	0	WWC1	corneal stroma
WDFY4.1	7.32e-09	0.315382	0.516	0.359	0.000143434	0	WDFY4.1	corneal stroma
TRIM69	4.81e-07	0.315238	0.429	0.314	0.00943975	0	TRIM69	corneal stroma
LOX	4.72e-12	0.314774	0.35	0.191	9.25e-08	0	LOX	corneal stroma
BMPR1A	7.96e-12	0.314726	0.717	0.524	1.56e-07	0	BMPR1A	corneal stroma
MGMT	2.16e-09	0.314479	0.638	0.485	4.23e-05	0	MGMT	corneal stroma
TTF2	9.1e-08	0.314055	0.592	0.46	0.00178508	0	TTF2	corneal stroma
JAK3	3.87e-11	0.313884	0.536	0.36	7.6e-07	0	JAK3	corneal stroma
LDHB	2.78e-09	0.313656	0.446	0.294	5.45e-05	0	LDHB	corneal stroma
MICA	3.55e-14	0.313435	0.324	0.154	6.96e-10	0	MICA	corneal stroma
TLE1	9.65e-11	0.313204	0.752	0.53	1.89e-06	0	TLE1	corneal stroma
MCF2L2	1.9e-11	0.312887	0.638	0.452	3.73e-07	0	MCF2L2	corneal stroma
DDX25	4.15e-11	0.312839	0.545	0.37	8.14e-07	0	DDX25	corneal stroma
IRX3	1.09e-12	0.312259	0.391	0.218	2.14e-08	0	IRX3	corneal stroma
PEBP4	2.44e-12	0.312066	0.755	0.566	4.78e-08	0	PEBP4	corneal stroma
FGF18	3.3e-09	0.312061	0.589	0.454	6.47e-05	0	FGF18	corneal stroma
PHACTR3	4.24e-10	0.311952	0.551	0.371	8.31e-06	0	PHACTR3	corneal stroma
P3H2	1.01e-08	0.311927	0.633	0.493	0.000198008	0	P3H2	corneal stroma
GATA3	1.1e-10	0.311874	0.408	0.246	2.16e-06	0	GATA3	corneal stroma
SLIT2	6.13e-12	0.311733	0.688	0.468	1.2e-07	0	SLIT2	corneal stroma
SIX4	3.22e-16	0.311718	0.394	0.195	6.31e-12	0	SIX4	corneal stroma
WNT11	3.58e-08	0.311606	0.44	0.299	0.000701763	0	WNT11	corneal stroma
EYA1	3.47e-14	0.311271	0.464	0.267	6.8e-10	0	EYA1	corneal stroma
BCL6	8.8e-10	0.310817	0.682	0.537	1.72e-05	0	BCL6	corneal stroma
FNBP1	1.88e-08	0.310784	0.592	0.46	0.000367892	0	FNBP1	corneal stroma
MAGI3	1.11e-08	0.310642	0.741	0.641	0.000217666	0	MAGI3	corneal stroma
RBMXL1	1.91e-10	0.310494	0.72	0.565	3.74e-06	0	RBMXL1	corneal stroma
TRPS1	2.24e-11	0.31037	0.638	0.451	4.39e-07	0	TRPS1	corneal stroma
RPTOR	9.49e-14	0.31005	0.816	0.6	1.86e-09	0	RPTOR	corneal stroma
RBMS1	4.3e-09	0.309826	0.755	0.624	8.43e-05	0	RBMS1	corneal stroma
MPP7	4.55e-06	0.309592	0.671	0.568	0.0891369	0	MPP7	corneal stroma
PDGFRB	1.42e-11	0.309568	0.601	0.407	2.78e-07	0	PDGFRB	corneal stroma
LHFP	1.39e-11	0.30928	0.609	0.415	2.73e-07	0	LHFP	corneal stroma
MTOR	3.51e-08	0.30901	0.641	0.522	0.000688813	0	MTOR	corneal stroma
TNXB	1.58e-06	0.308777	0.536	0.422	0.0310552	0	TNXB	corneal stroma
MAML3	2.12e-14	0.308748	0.918	0.672	4.15e-10	0	MAML3	corneal stroma
LAMA4	8.82e-12	0.30846	0.621	0.412	1.73e-07	0	LAMA4	corneal stroma
C12orf75	6.41e-07	0.308413	0.609	0.507	0.012566	0	C12orf75	corneal stroma
FZD1	9.84e-10	0.308095	0.481	0.32	1.93e-05	0	FZD1	corneal stroma
SPRY4	8.19e-12	0.308053	0.475	0.294	1.61e-07	0	SPRY4	corneal stroma
PCDHA13	3.93e-14	0.308045	0.385	0.2	7.7e-10	0	PCDHA13	corneal stroma
PCDHA3	6.03e-12	0.307811	0.414	0.238	1.18e-07	0	PCDHA3	corneal stroma
WNT2B	3.08e-08	0.307148	0.42	0.285	0.000604586	0	WNT2B	corneal stroma
MME	2.31e-09	0.306936	0.335	0.197	4.54e-05	0	MME	corneal stroma
PTPRS	5.72e-11	0.306757	0.729	0.546	1.12e-06	0	PTPRS	corneal stroma
GLIPR1L2	1.3e-14	0.306586	0.362	0.185	2.55e-10	0	GLIPR1L2	corneal stroma
GADL1	9.47e-15	0.306415	0.411	0.226	1.86e-10	0	GADL1	corneal stroma
PLCH1	2.68e-08	0.306252	0.563	0.401	0.000524835	0	PLCH1	corneal stroma
NR2F2	7.75e-11	0.305915	0.507	0.326	1.52e-06	0	NR2F2	corneal stroma
EYA4	1.33e-14	0.305811	0.525	0.33	2.6e-10	0	EYA4	corneal stroma
PCDHA2	8.91e-12	0.30544	0.417	0.241	1.75e-07	0	PCDHA2	corneal stroma
TNKS	9.75e-08	0.305084	0.65	0.556	0.00191217	0	TNKS	corneal stroma
BCAT1	3.29e-09	0.305006	0.429	0.284	6.45e-05	0	BCAT1	corneal stroma
RFX2	8.25e-11	0.304831	0.831	0.765	1.62e-06	0	RFX2	corneal stroma
PCGF2	2.08e-10	0.304679	0.58	0.413	4.09e-06	0	PCGF2	corneal stroma
SRBD1	1.85e-07	0.304649	0.469	0.348	0.00362338	0	SRBD1	corneal stroma
ANXA2	1.21e-09	0.304588	0.621	0.466	2.37e-05	0	ANXA2	corneal stroma
PCDHAC1	8.15e-15	0.304188	0.37	0.184	1.6e-10	0	PCDHAC1	corneal stroma
CACNB2	4.53e-11	0.304156	0.569	0.398	8.88e-07	0	CACNB2	corneal stroma
SNAP25	8.4e-10	0.304154	0.443	0.283	1.65e-05	0	SNAP25	corneal stroma
SLC5A10	0.000187599	0.304082	0.37	0.277	1	0	SLC5A10	corneal stroma
MPDZ	2.6e-10	0.304057	0.493	0.334	5.11e-06	0	MPDZ	corneal stroma
NTNG1	1.95e-14	0.303903	0.569	0.353	3.82e-10	0	NTNG1	corneal stroma
PCDHA1	2.01e-11	0.303808	0.417	0.245	3.93e-07	0	PCDHA1	corneal stroma
TRAK1	3.08e-13	0.303754	0.764	0.536	6.05e-09	0	TRAK1	corneal stroma
XPO4	4.65e-07	0.303587	0.487	0.377	0.00911674	0	XPO4	corneal stroma
BFSP2	1.38e-06	0.303579	0.37	0.256	0.0269649	0	BFSP2	corneal stroma
VGLL4	2.16e-11	0.30308	0.767	0.577	4.24e-07	0	VGLL4	corneal stroma
SFMBT2	2.48e-10	0.302944	0.609	0.435	4.87e-06	0	SFMBT2	corneal stroma
CTTNBP2NL	5.55e-08	0.302613	0.507	0.37	0.00108856	0	CTTNBP2NL	corneal stroma
B3GNT5	3.55e-10	0.302484	0.405	0.25	6.96e-06	0	B3GNT5	corneal stroma
IRX1	7.27e-15	0.302301	0.327	0.155	1.42e-10	0	IRX1	corneal stroma
PROX2	6.9e-11	0.302235	0.294	0.156	1.35e-06	0	PROX2	corneal stroma
MET	3.81e-11	0.301762	0.466	0.289	7.46e-07	0	MET	corneal stroma
FLNC	1.64e-11	0.301743	0.612	0.412	3.21e-07	0	FLNC	corneal stroma
SLC44A3	4.93e-10	0.30138	0.499	0.329	9.67e-06	0	SLC44A3	corneal stroma
MTRR	9.56e-10	0.301357	0.475	0.325	1.87e-05	0	MTRR	corneal stroma
LAMB4	1.64e-14	0.301229	0.478	0.268	3.22e-10	0	LAMB4	corneal stroma
PCDHA11	5.63e-13	0.301048	0.388	0.21	1.1e-08	0	PCDHA11	corneal stroma
PCDHA5	1.91e-11	0.300975	0.397	0.227	3.75e-07	0	PCDHA5	corneal stroma
CLMP	2.1e-13	0.300859	0.566	0.369	4.12e-09	0	CLMP	corneal stroma
EPB41L3	7.84e-13	0.300848	0.638	0.436	1.54e-08	0	EPB41L3	corneal stroma
ADAMTS5	2.43e-12	0.300815	0.452	0.264	4.76e-08	0	ADAMTS5	corneal stroma
AKAP12	8.03e-09	0.30081	0.571	0.406	0.000157381	0	AKAP12	corneal stroma
JDP2	3.51e-11	0.300639	0.429	0.257	6.88e-07	0	JDP2	corneal stroma
ATF6B	5.77e-06	0.300558	0.682	0.628	0.113202	0	ATF6B	corneal stroma
GALNT18	3.41e-10	0.300468	0.676	0.478	6.68e-06	0	GALNT18	corneal stroma
NTRK3	1.55e-12	0.300429	0.586	0.4	3.04e-08	0	NTRK3	corneal stroma
SH3D21	1.54e-07	0.300307	0.641	0.536	0.00302737	0	SH3D21	corneal stroma
SLC24A4	1.76e-10	0.300245	0.458	0.292	3.45e-06	0	SLC24A4	corneal stroma
CDH9	0.00519773	0.299955	0.195	0.142	1	0	CDH9	corneal stroma
PRKCDBP	7.99e-15	0.299922	0.233	0.092	1.57e-10	0	PRKCDBP	corneal stroma
RMDN2	1.44e-09	0.299708	0.429	0.275	2.82e-05	0	RMDN2	corneal stroma
ATE1	9.04e-05	0.299501	0.557	0.473	1	0	ATE1	corneal stroma
PCDHA6	9.01e-12	0.299465	0.397	0.225	1.77e-07	0	PCDHA6	corneal stroma
PCDHA12	2.42e-13	0.299163	0.385	0.205	4.74e-09	0	PCDHA12	corneal stroma
PAPPA2	3.68e-08	0.299035	0.493	0.343	0.000721072	0	PAPPA2	corneal stroma
FAM110B	5.59e-06	0.298643	0.633	0.509	0.109665	0	FAM110B	corneal stroma
PHLDB1	6.22e-10	0.298342	0.636	0.477	1.22e-05	0	PHLDB1	corneal stroma
LMCD1	5.85e-11	0.298311	0.504	0.327	1.15e-06	0	LMCD1	corneal stroma
PCDHA4	3.72e-11	0.298287	0.402	0.234	7.29e-07	0	PCDHA4	corneal stroma
MKL2	1.01e-05	0.29827	0.417	0.314	0.197127	0	MKL2	corneal stroma
PMEPA1	5.1e-07	0.298265	0.557	0.416	0.00999549	0	PMEPA1	corneal stroma
TNC	1.1e-10	0.298199	0.399	0.233	2.15e-06	0	TNC	corneal stroma
FAM196B	1.9e-10	0.297928	0.364	0.214	3.73e-06	0	FAM196B	corneal stroma
VTI1A	1.16e-06	0.297841	0.603	0.49	0.0226813	0	VTI1A	corneal stroma
TMEM2	8.43e-09	0.297364	0.65	0.5	0.000165339	0	TMEM2	corneal stroma
ETV5	6.85e-08	0.297143	0.741	0.589	0.00134249	0	ETV5	corneal stroma
ZNF536	3.26e-14	0.296756	0.813	0.567	6.4e-10	0	ZNF536	corneal stroma
PXDN	5.96e-09	0.296566	0.577	0.409	0.000116791	0	PXDN	corneal stroma
THBS1	6.57e-09	0.296452	0.414	0.26	0.000128804	0	THBS1	corneal stroma
FAM189A1	2.71e-06	0.296059	0.58	0.439	0.0532235	0	FAM189A1	corneal stroma
PRKG2	9.81e-10	0.2957	0.306	0.169	1.92e-05	0	PRKG2	corneal stroma
ENPP6	1.89e-12	0.295251	0.458	0.272	3.7e-08	0	ENPP6	corneal stroma
RP11-903H12.5	6.3e-12	0.29525	0.513	0.321	1.24e-07	0	RP11-903H12.5	corneal stroma
HDAC4	0.000112745	0.29505	0.918	0.858	1	0	HDAC4	corneal stroma
CRYBG3	5.5e-08	0.294887	0.426	0.288	0.00107798	0	CRYBG3	corneal stroma
ZNF608	2.86e-14	0.294851	0.796	0.521	5.62e-10	0	ZNF608	corneal stroma
TBC1D9	2.48e-08	0.29484	0.496	0.347	0.000485523	0	TBC1D9	corneal stroma
ZNF532	9.38e-09	0.294584	0.455	0.311	0.000183893	0	ZNF532	corneal stroma
ANG	2.03e-11	0.294435	0.525	0.333	3.99e-07	0	ANG	corneal stroma
WTIP	3.97e-10	0.294323	0.455	0.295	7.79e-06	0	WTIP	corneal stroma
PRMT8	2.54e-11	0.294287	0.402	0.237	4.98e-07	0	PRMT8	corneal stroma
PCDH18	6.95e-13	0.294141	0.353	0.186	1.36e-08	0	PCDH18	corneal stroma
KCTD19	2.69e-09	0.294082	0.265	0.142	5.28e-05	0	KCTD19	corneal stroma
ALPK2	2.88e-09	0.293976	0.542	0.37	5.66e-05	0	ALPK2	corneal stroma
PCDHA7	4.86e-12	0.293762	0.391	0.218	9.53e-08	0	PCDHA7	corneal stroma
RERE	6.69e-10	0.293523	0.88	0.782	1.31e-05	0	RERE	corneal stroma
MKX	5.11e-10	0.293474	0.429	0.266	1e-05	0	MKX	corneal stroma
PLCB4	1.44e-10	0.293252	0.647	0.459	2.83e-06	0	PLCB4	corneal stroma
STOX2	1.01e-15	0.293243	0.691	0.462	1.99e-11	0	STOX2	corneal stroma
ZNF407	7.37e-08	0.293057	0.714	0.564	0.00144534	0	ZNF407	corneal stroma
PBX1	6.9e-15	0.292309	0.907	0.703	1.35e-10	0	PBX1	corneal stroma
EVA1A	2.96e-10	0.292086	0.429	0.266	5.79e-06	0	EVA1A	corneal stroma
ASPH	3.18e-09	0.292074	0.644	0.492	6.24e-05	0	ASPH	corneal stroma
ADGRG2	2.39e-09	0.291951	0.268	0.145	4.69e-05	0	ADGRG2	corneal stroma
RNASE4	2.7e-11	0.291835	0.528	0.337	5.29e-07	0	RNASE4	corneal stroma
AHRR	4.13e-09	0.291713	0.688	0.544	8.09e-05	0	AHRR	corneal stroma
RNGTT	1.29e-06	0.291667	0.603	0.52	0.0253787	0	RNGTT	corneal stroma
LYPD6	7.3e-10	0.291655	0.487	0.329	1.43e-05	0	LYPD6	corneal stroma
SLC2A9	4.26e-09	0.291502	0.621	0.454	8.35e-05	0	SLC2A9	corneal stroma
PCDHA10	4e-12	0.291424	0.388	0.215	7.84e-08	0	PCDHA10	corneal stroma
MAF	2.66e-08	0.291358	0.379	0.247	0.000521111	0	MAF	corneal stroma
TMC3	3e-13	0.291336	0.201	0.078	5.88e-09	0	TMC3	corneal stroma
PLOD2	2.97e-14	0.291296	0.437	0.246	5.82e-10	0	PLOD2	corneal stroma
PCDHA9	2.29e-12	0.290943	0.391	0.215	4.48e-08	0	PCDHA9	corneal stroma
ALG6	7.68e-07	0.290903	0.397	0.282	0.0150541	0	ALG6	corneal stroma
COL3A1	6.69e-12	0.29088	0.408	0.232	1.31e-07	0	COL3A1	corneal stroma
MYRIP	0.000242946	0.290832	0.487	0.402	1	0	MYRIP	corneal stroma
RP5-1052I5.2	6.29e-07	0.290504	0.519	0.399	0.0123402	0	RP5-1052I5.2	corneal stroma
SEC24D	8.89e-11	0.2903	0.609	0.428	1.74e-06	0	SEC24D	corneal stroma
FTO	3.27e-08	0.290222	0.758	0.666	0.000641021	0	FTO	corneal stroma
LEF1	1.11e-09	0.290221	0.493	0.327	2.18e-05	0	LEF1	corneal stroma
LTV1	1.17e-07	0.290041	0.501	0.365	0.00229539	0	LTV1	corneal stroma
NECTIN3	1.11e-09	0.290013	0.603	0.425	2.19e-05	0	NECTIN3	corneal stroma
MYLK	1.33e-09	0.289875	0.595	0.438	2.6e-05	0	MYLK	corneal stroma
ADAMTS14	9.3e-10	0.289774	0.464	0.301	1.82e-05	0	ADAMTS14	corneal stroma
VWA8	5.51e-08	0.289719	0.618	0.494	0.00108092	0	VWA8	corneal stroma
CA13	2.61e-06	0.289578	0.598	0.472	0.0512203	0	CA13	corneal stroma
PCDHA8	3.77e-12	0.289038	0.391	0.217	7.39e-08	0	PCDHA8	corneal stroma
MIPOL1	4.18e-06	0.288967	0.446	0.332	0.0819907	0	MIPOL1	corneal stroma
SESTD1	5.61e-06	0.288952	0.417	0.301	0.110067	0	SESTD1	corneal stroma
MB21D2	2.21e-07	0.288765	0.49	0.352	0.00433008	0	MB21D2	corneal stroma
FAM168A	0.00107363	0.288687	0.662	0.622	1	0	FAM168A	corneal stroma
C12orf4	1.57e-08	0.288395	0.356	0.233	0.000308339	0	C12orf4	corneal stroma
KIF1BP	1.31e-07	0.287903	0.455	0.32	0.00255901	0	KIF1BP	corneal stroma
ATXN10	6.69e-09	0.287429	0.536	0.39	0.000131116	0	ATXN10	corneal stroma
KYAT3	2.37e-09	0.287276	0.732	0.589	4.65e-05	0	KYAT3	corneal stroma
SLC39A11	1.62e-09	0.28726	0.653	0.48	3.17e-05	0	SLC39A11	corneal stroma
SLC16A10	0.000308758	0.287205	0.376	0.28	1	0	SLC16A10	corneal stroma
SNAP23	5.57e-08	0.28697	0.516	0.386	0.00109132	0	SNAP23	corneal stroma
FSTL1	5.22e-11	0.286909	0.627	0.426	1.02e-06	0	FSTL1	corneal stroma
ERGIC1	7.66e-05	0.28682	0.601	0.506	1	0	ERGIC1	corneal stroma
GALNT12	5.86e-07	0.286419	0.259	0.155	0.0114802	0	GALNT12	corneal stroma
L3MBTL3	0.0010866	0.286266	0.373	0.302	1	0	L3MBTL3	corneal stroma
FGFR1	2.26e-12	0.286194	0.589	0.381	4.44e-08	0	FGFR1	corneal stroma
FAM19A5	6.14e-14	0.285974	0.694	0.466	1.2e-09	0	FAM19A5	corneal stroma
RPS6KA5	2.51e-11	0.285751	0.845	0.73	4.91e-07	0	RPS6KA5	corneal stroma
HDAC7	1.84e-09	0.28548	0.641	0.474	3.61e-05	0	HDAC7	corneal stroma
EPHA4	3.29e-11	0.285301	0.644	0.453	6.45e-07	0	EPHA4	corneal stroma
VCL	1.08e-07	0.285281	0.758	0.663	0.00211529	0	VCL	corneal stroma
SRGAP1	3.15e-10	0.285276	0.653	0.475	6.17e-06	0	SRGAP1	corneal stroma
DOK5	3.96e-10	0.285241	0.481	0.306	7.76e-06	0	DOK5	corneal stroma
MSRB3	2.1e-08	0.28509	0.429	0.291	0.000412305	0	MSRB3	corneal stroma
GNG7	4.6e-09	0.284966	0.703	0.564	9.01e-05	0	GNG7	corneal stroma
BMP3	5.05e-12	0.284847	0.242	0.11	9.91e-08	0	BMP3	corneal stroma
SOX4	2.61e-08	0.28475	0.417	0.281	0.00051232	0	SOX4	corneal stroma
GRAMD1A	2.99e-09	0.284542	0.434	0.282	5.85e-05	0	GRAMD1A	corneal stroma
PWWP2A	0.000544416	0.283848	0.708	0.652	1	0	PWWP2A	corneal stroma
HABP2	0.00114353	0.283826	0.149	0.094	1	0	HABP2	corneal stroma
OSBPL6	8.53e-09	0.283642	0.603	0.447	0.000167185	0	OSBPL6	corneal stroma
C2orf73	1.12e-06	0.283512	0.417	0.3	0.0219788	0	C2orf73	corneal stroma
MX1	9.65e-11	0.28328	0.242	0.118	1.89e-06	0	MX1	corneal stroma
MVB12B	7.13e-09	0.283278	0.618	0.448	0.000139716	0	MVB12B	corneal stroma
WDFY4	1.36e-07	0.283	0.531	0.385	0.00266088	0	WDFY4	corneal stroma
TTC22	6.53e-06	0.282914	0.242	0.155	0.127996	0	TTC22	corneal stroma
WDR74	4.42e-08	0.28266	0.72	0.602	0.000866795	0	WDR74	corneal stroma
GALNT16	2.99e-06	0.282257	0.379	0.267	0.0586488	0	GALNT16	corneal stroma
GPR158	1.15e-10	0.282239	0.49	0.325	2.26e-06	0	GPR158	corneal stroma
2010-09-01	3.15e-08	0.282205	0.609	0.455	0.000618193	0	2010-09-01	corneal stroma
NSMCE2	6.91e-06	0.282087	0.679	0.612	0.135498	0	NSMCE2	corneal stroma
RIN2	1.33e-12	0.282043	0.601	0.38	2.62e-08	0	RIN2	corneal stroma
NEK6	2.02e-07	0.282018	0.58	0.424	0.00395817	0	NEK6	corneal stroma
XRCC4	8.9e-09	0.281929	0.566	0.416	0.000174488	0	XRCC4	corneal stroma
INTS9	1.83e-08	0.281896	0.793	0.716	0.000359464	0	INTS9	corneal stroma
RAD51AP1	1.64e-08	0.281669	0.341	0.218	0.000321357	0	RAD51AP1	corneal stroma
NIN	8.19e-08	0.281604	0.531	0.384	0.00160517	0	NIN	corneal stroma
NOL10	2.84e-07	0.281374	0.464	0.337	0.00557681	0	NOL10	corneal stroma
EGR3	4.1e-11	0.281275	0.408	0.239	8.04e-07	0	EGR3	corneal stroma
AR	4.49e-08	0.281179	0.265	0.151	0.000881299	0	AR	corneal stroma
ASXL3	1.52e-10	0.281113	0.519	0.354	2.99e-06	0	ASXL3	corneal stroma
MYADM	1.69e-12	0.281026	0.673	0.455	3.31e-08	0	MYADM	corneal stroma
CACNB3	2.9e-06	0.280964	0.44	0.327	0.0569519	0	CACNB3	corneal stroma
ZNF618	4.65e-08	0.2809	0.507	0.358	0.000912206	0	ZNF618	corneal stroma
COL16A1	9.3e-10	0.280854	0.548	0.377	1.82e-05	0	COL16A1	corneal stroma
GHR	6.97e-10	0.280603	0.557	0.376	1.37e-05	0	GHR	corneal stroma
RND3	7.86e-09	0.28045	0.519	0.353	0.000154099	0	RND3	corneal stroma
TPK1	7.98e-05	0.280439	0.525	0.415	1	0	TPK1	corneal stroma
WASF3	8.34e-09	0.280405	0.487	0.334	0.000163518	0	WASF3	corneal stroma
TNRC6A	1.56e-06	0.279605	0.63	0.526	0.0305508	0	TNRC6A	corneal stroma
REPS2	2.55e-08	0.279491	0.563	0.427	0.000500313	0	REPS2	corneal stroma
C3orf70	3.11e-08	0.279478	0.344	0.215	0.000610139	0	C3orf70	corneal stroma
SIRPA	3.13e-09	0.279256	0.356	0.215	6.14e-05	0	SIRPA	corneal stroma
KLF5	2.94e-06	0.279206	0.414	0.298	0.0576493	0	KLF5	corneal stroma
CDH6	4.85e-08	0.278992	0.367	0.23	0.000950071	0	CDH6	corneal stroma
CTTNBP2	5.18e-05	0.278649	0.417	0.305	1	0	CTTNBP2	corneal stroma
SORBS2	3.12e-10	0.278592	0.65	0.445	6.11e-06	0	SORBS2	corneal stroma
MRAS	2.46e-07	0.278589	0.335	0.212	0.00482159	0	MRAS	corneal stroma
ANO2	1.48e-08	0.277791	0.566	0.408	0.000290543	0	ANO2	corneal stroma
KCNN3	3.47e-08	0.277722	0.653	0.514	0.000681226	0	KCNN3	corneal stroma
CDC20B	1.04e-07	0.276689	0.405	0.27	0.00203545	0	CDC20B	corneal stroma
NXPH1	3.26e-06	0.276585	0.452	0.321	0.0638426	0	NXPH1	corneal stroma
DAB2	1.52e-11	0.276377	0.399	0.232	2.99e-07	0	DAB2	corneal stroma
ZNF235	4.13e-10	0.276247	0.373	0.222	8.1e-06	0	ZNF235	corneal stroma
NECAB1	1.8e-06	0.276231	0.382	0.265	0.0352896	0	NECAB1	corneal stroma
ADRA1A	3.24e-09	0.276114	0.309	0.179	6.35e-05	0	ADRA1A	corneal stroma
TBRG1	1.28e-08	0.275939	0.265	0.149	0.0002513	0	TBRG1	corneal stroma
SERTAD4	5.42e-10	0.275537	0.335	0.19	1.06e-05	0	SERTAD4	corneal stroma
TMEM254	6.82e-11	0.275273	0.335	0.184	1.34e-06	0	TMEM254	corneal stroma
TAS2R1	1.31e-15	0.275261	0.327	0.15	2.56e-11	0	TAS2R1	corneal stroma
ZDHHC14	7.63e-08	0.275159	0.735	0.621	0.00149511	0	ZDHHC14	corneal stroma
AOX1	1.24e-10	0.274951	0.292	0.151	2.44e-06	0	AOX1	corneal stroma
KCNK2	3e-12	0.274628	0.399	0.228	5.88e-08	0	KCNK2	corneal stroma
BRE	1.92e-07	0.274601	0.7	0.596	0.00376723	0	BRE	corneal stroma
TRIM9	4.68e-10	0.274144	0.539	0.348	9.17e-06	0	TRIM9	corneal stroma
TNNT3	3.32e-10	0.274072	0.318	0.174	6.52e-06	0	TNNT3	corneal stroma
PDE1B	3.73e-07	0.274001	0.347	0.228	0.00730434	0	PDE1B	corneal stroma
DZANK1	2.21e-08	0.273874	0.507	0.373	0.000433493	0	DZANK1	corneal stroma
PTGFRN	1.15e-09	0.273689	0.429	0.27	2.26e-05	0	PTGFRN	corneal stroma
WNT2	4.34e-14	0.273462	0.268	0.118	8.52e-10	0	WNT2	corneal stroma
ANXA11	2.06e-10	0.273441	0.458	0.295	4.04e-06	0	ANXA11	corneal stroma
SKA2	5.33e-07	0.273396	0.726	0.635	0.0104603	0	SKA2	corneal stroma
SPC24	1.31e-06	0.273291	0.569	0.453	0.0257129	0	SPC24	corneal stroma
C14orf80	8.13e-07	0.273003	0.802	0.737	0.0159326	0	C14orf80	corneal stroma
RAB30	1.6e-08	0.272989	0.726	0.636	0.000314204	0	RAB30	corneal stroma
UACA	7.94e-09	0.272833	0.429	0.278	0.000155616	0	UACA	corneal stroma
KIAA1211L	1.8e-05	0.272773	0.373	0.267	0.352636	0	KIAA1211L	corneal stroma
SPRY2	4.55e-09	0.272568	0.504	0.341	8.92e-05	0	SPRY2	corneal stroma
CEP70	6.13e-08	0.272536	0.516	0.395	0.00120206	0	CEP70	corneal stroma
VCPIP1	8.79e-07	0.272247	0.708	0.628	0.0172298	0	VCPIP1	corneal stroma
ARMC3	1.92e-06	0.272138	0.239	0.143	0.0375483	0	ARMC3	corneal stroma
SEMA4F	3.78e-05	0.271961	0.338	0.251	0.74148	0	SEMA4F	corneal stroma
CHD3	2.54e-10	0.271952	0.595	0.422	4.98e-06	0	CHD3	corneal stroma
MAP3K5	3.64e-10	0.27134	0.507	0.352	7.14e-06	0	MAP3K5	corneal stroma
DNAH8	1.4e-11	0.271166	0.356	0.2	2.75e-07	0	DNAH8	corneal stroma
NUP98	1.72e-08	0.271073	0.819	0.743	0.000336317	0	NUP98	corneal stroma
EML1	2.26e-07	0.271023	0.665	0.531	0.00443072	0	EML1	corneal stroma
DGKG	6.81e-08	0.270983	0.773	0.647	0.00133507	0	DGKG	corneal stroma
CHN2	1.07e-08	0.270948	0.598	0.434	0.000210072	0	CHN2	corneal stroma
NFATC4	5.13e-10	0.270495	0.679	0.475	1.01e-05	0	NFATC4	corneal stroma
COL25A1	7.88e-10	0.270283	0.644	0.473	1.54e-05	0	COL25A1	corneal stroma
STARD13	7.35e-11	0.270193	0.656	0.456	1.44e-06	0	STARD13	corneal stroma
NR6A1	9.93e-07	0.27017	0.755	0.695	0.019476	0	NR6A1	corneal stroma
ID1	1.88e-06	0.269988	0.563	0.45	0.0368048	0	ID1	corneal stroma
CDK1	3.57e-08	0.26995	0.362	0.234	0.00070012	0	CDK1	corneal stroma
CTD-3088G3.8	4.41e-09	0.269553	0.493	0.338	8.65e-05	0	CTD-3088G3.8	corneal stroma
WBP11	2.43e-07	0.269524	0.528	0.404	0.00477008	0	WBP11	corneal stroma
ZBTB8B	1.9e-11	0.269506	0.3	0.157	3.73e-07	0	ZBTB8B	corneal stroma
ERI2	1.26e-05	0.269471	0.735	0.674	0.247511	0	ERI2	corneal stroma
AIMP1	7.69e-11	0.269299	0.446	0.276	1.51e-06	0	AIMP1	corneal stroma
SLC1A3	9.21e-09	0.268985	0.397	0.248	0.000180497	0	SLC1A3	corneal stroma
DYNC1I1	5.13e-09	0.268839	0.548	0.385	0.000100621	0	DYNC1I1	corneal stroma
STARD4	2.17e-07	0.268805	0.411	0.286	0.00426084	0	STARD4	corneal stroma
FZD2	2.5e-08	0.268718	0.414	0.275	0.000489833	0	FZD2	corneal stroma
PLEKHG2	1.95e-08	0.268247	0.694	0.571	0.000382825	0	PLEKHG2	corneal stroma
DNMT1	6.94e-07	0.268232	0.618	0.512	0.0136093	0	DNMT1	corneal stroma
IQGAP2	3.83e-06	0.268154	0.697	0.621	0.0750703	0	IQGAP2	corneal stroma
FHOD3	2.82e-08	0.268007	0.691	0.534	0.000552902	0	FHOD3	corneal stroma
CHEK2	5.82e-07	0.267793	0.673	0.602	0.0114163	0	CHEK2	corneal stroma
NUP205	7.46e-06	0.267239	0.379	0.274	0.146334	0	NUP205	corneal stroma
MED12L	1.53e-10	0.267078	0.659	0.486	3e-06	0	MED12L	corneal stroma
TRIM26	1.85e-09	0.266988	0.458	0.3	3.63e-05	0	TRIM26	corneal stroma
PATJ	1.69e-08	0.266811	0.554	0.413	0.000331163	0	PATJ	corneal stroma
TRRAP	4.23e-07	0.266769	0.446	0.33	0.00829053	0	TRRAP	corneal stroma
VSNL1	8e-08	0.266747	0.481	0.337	0.00156762	0	VSNL1	corneal stroma
SNX9	1.01e-05	0.2666	0.636	0.54	0.197534	0	SNX9	corneal stroma
FYN	2.37e-06	0.265983	0.857	0.781	0.04639	0	FYN	corneal stroma
AK2	8.85e-08	0.265913	0.539	0.399	0.00173608	0	AK2	corneal stroma
GNG12	1.29e-07	0.265808	0.621	0.479	0.00253081	0	GNG12	corneal stroma
BCAR3	2.48e-08	0.265728	0.828	0.716	0.000486981	0	BCAR3	corneal stroma
POLR3F	1.6e-08	0.265714	0.452	0.316	0.00031465	0	POLR3F	corneal stroma
FAT1	8.31e-10	0.265525	0.551	0.375	1.63e-05	0	FAT1	corneal stroma
RASSF8	5.37e-12	0.265458	0.56	0.365	1.05e-07	0	RASSF8	corneal stroma
STK32B	3.22e-08	0.265387	0.499	0.35	0.000631662	0	STK32B	corneal stroma
CHST1	5.69e-09	0.265325	0.364	0.223	0.000111604	0	CHST1	corneal stroma
PPEF1	5.72e-10	0.26504	0.344	0.201	1.12e-05	0	PPEF1	corneal stroma
SYNJ2	1.73e-08	0.264842	0.58	0.415	0.000338777	0	SYNJ2	corneal stroma
FAM84A	1.4e-09	0.264308	0.344	0.201	2.74e-05	0	FAM84A	corneal stroma
GRIK1	3.73e-06	0.264118	0.466	0.349	0.0732047	0	GRIK1	corneal stroma
INTU	2.26e-10	0.263874	0.417	0.259	4.42e-06	0	INTU	corneal stroma
HELLS	6.18e-10	0.263807	0.329	0.191	1.21e-05	0	HELLS	corneal stroma
RCAN2	1.89e-06	0.263605	0.443	0.323	0.0370621	0	RCAN2	corneal stroma
CHRDL2	1.19e-08	0.263605	0.318	0.189	0.000232359	0	CHRDL2	corneal stroma
SLC35F2	1.56e-10	0.263476	0.536	0.367	3.06e-06	0	SLC35F2	corneal stroma
ARF3	5.08e-08	0.263127	0.504	0.373	0.000995738	0	ARF3	corneal stroma
FOXN3	2.07e-08	0.26308	0.875	0.781	0.00040504	0	FOXN3	corneal stroma
ID3	3.48e-09	0.263037	0.431	0.282	6.82e-05	0	ID3	corneal stroma
ELOVL5	2.42e-07	0.262738	0.618	0.504	0.00475066	0	ELOVL5	corneal stroma
TGFBR2	1.34e-08	0.262689	0.461	0.308	0.000261843	0	TGFBR2	corneal stroma
C8orf44	2.53e-06	0.262478	0.7	0.617	0.0495593	0	C8orf44	corneal stroma
AC008686.1	1.74e-13	0.262339	0.327	0.16	3.41e-09	0	AC008686.1	corneal stroma
DSCR8	1.36e-05	0.262303	0.236	0.144	0.267334	0	DSCR8	corneal stroma
HFM1	2.99e-07	0.262236	0.364	0.243	0.00585428	0	HFM1	corneal stroma
ITGB3BP	4.69e-09	0.262235	0.458	0.31	9.19e-05	0	ITGB3BP	corneal stroma
INTS12	2.7e-07	0.262209	0.516	0.386	0.00529075	0	INTS12	corneal stroma
ZNF718	4.34e-11	0.261707	0.397	0.233	8.5e-07	0	ZNF718	corneal stroma
SLC6A6	9.13e-09	0.26149	0.636	0.463	0.000178928	0	SLC6A6	corneal stroma
NEDD4L	1.18e-06	0.261472	0.837	0.735	0.0232109	0	NEDD4L	corneal stroma
LAMA1	2.38e-08	0.261444	0.394	0.258	0.000466339	0	LAMA1	corneal stroma
DIS3L2	4.78e-07	0.261285	0.595	0.458	0.00937447	0	DIS3L2	corneal stroma
C17orf51	4.52e-10	0.261226	0.367	0.221	8.87e-06	0	C17orf51	corneal stroma
PTPN14	7.62e-09	0.261162	0.624	0.457	0.000149334	0	PTPN14	corneal stroma
IGFBP3	9.76e-08	0.261113	0.292	0.175	0.00191462	0	IGFBP3	corneal stroma
MRVI1	1.99e-06	0.261062	0.376	0.255	0.038933	0	MRVI1	corneal stroma
EFEMP1	4.51e-09	0.260931	0.268	0.147	8.84e-05	0	EFEMP1	corneal stroma
GABRA6	2.14e-07	0.260802	0.259	0.152	0.00419302	0	GABRA6	corneal stroma
NTN1	4.14e-10	0.260658	0.691	0.513	8.12e-06	0	NTN1	corneal stroma
PLAGL1	0.00160929	0.260561	0.426	0.353	1	0	PLAGL1	corneal stroma
TMEM266	3.78e-05	0.260249	0.434	0.32	0.7403	0	TMEM266	corneal stroma
PRR11	1.34e-06	0.260129	0.726	0.641	0.0262051	0	PRR11	corneal stroma
RP11-434D12.1	6.13e-08	0.260018	0.318	0.195	0.0012012	0	RP11-434D12.1	corneal stroma
ADAMTS20	1.03e-10	0.259802	0.338	0.189	2.02e-06	0	ADAMTS20	corneal stroma
FOXC1	2.03e-11	0.259697	0.312	0.161	3.98e-07	0	FOXC1	corneal stroma
GDNF	1.31e-12	0.259435	0.303	0.147	2.57e-08	0	GDNF	corneal stroma
LTBP2	1.41e-07	0.259286	0.545	0.404	0.00276147	0	LTBP2	corneal stroma
PIWIL4	5.04e-11	0.259274	0.391	0.231	9.88e-07	0	PIWIL4	corneal stroma
CDK15	1.45e-09	0.259081	0.399	0.256	2.83e-05	0	CDK15	corneal stroma
DROSHA	8.6e-06	0.259064	0.504	0.406	0.168636	0	DROSHA	corneal stroma
ZNF43	1.53e-05	0.258887	0.446	0.346	0.299643	0	ZNF43	corneal stroma
NOX4	6.38e-09	0.258851	0.382	0.237	0.000125095	0	NOX4	corneal stroma
TMED8	1.52e-07	0.258586	0.37	0.249	0.00298981	0	TMED8	corneal stroma
CLDN11	1.46e-09	0.258501	0.662	0.502	2.86e-05	0	CLDN11	corneal stroma
SAMD11	3.29e-08	0.258478	0.542	0.381	0.000644423	0	SAMD11	corneal stroma
CCDC15	2.5e-08	0.258405	0.431	0.289	0.000489527	0	CCDC15	corneal stroma
NRP2	1.08e-11	0.258331	0.673	0.47	2.12e-07	0	NRP2	corneal stroma
CDH11	5.14e-13	0.258209	0.706	0.463	1.01e-08	0	CDH11	corneal stroma
CHST3	1.19e-09	0.258196	0.452	0.284	2.34e-05	0	CHST3	corneal stroma
CDC42EP5	8.14e-09	0.258134	0.417	0.276	0.000159676	0	CDC42EP5	corneal stroma
RAB27B	6.74e-11	0.257992	0.356	0.2	1.32e-06	0	RAB27B	corneal stroma
PTPRE	9.79e-12	0.257988	0.545	0.356	1.92e-07	0	PTPRE	corneal stroma
ENAH	2.89e-08	0.2577	0.603	0.457	0.000567116	0	ENAH	corneal stroma
GREM2	4.99e-07	0.257634	0.327	0.214	0.00977952	0	GREM2	corneal stroma
B3GALT5	3.16e-08	0.257543	0.315	0.186	0.000619436	0	B3GALT5	corneal stroma
PAPSS1	7.3e-07	0.257527	0.603	0.47	0.0143227	0	PAPSS1	corneal stroma
DSTN	3.33e-08	0.25742	0.539	0.399	0.000653335	0	DSTN	corneal stroma
BMF	4.9e-07	0.257346	0.711	0.625	0.00959906	0	BMF	corneal stroma
FAM107B	2.21e-08	0.257166	0.703	0.551	0.000432463	0	FAM107B	corneal stroma
PCDHAC2	5.23e-13	0.257063	0.286	0.132	1.02e-08	0	PCDHAC2	corneal stroma
ZBTB16	9.2e-11	0.257046	0.778	0.562	1.8e-06	0	ZBTB16	corneal stroma
TCERG1L	5.27e-08	0.25689	0.478	0.316	0.00103272	0	TCERG1L	corneal stroma
DOCK10	1.35e-08	0.256876	0.574	0.392	0.000263823	0	DOCK10	corneal stroma
BTN2A1	3.5e-06	0.25679	0.344	0.236	0.0686292	0	BTN2A1	corneal stroma
LRRC9	0.00860168	0.256582	0.265	0.211	1	0	LRRC9	corneal stroma
MCTP2	0.000159987	0.25658	0.367	0.272	1	0	MCTP2	corneal stroma
RP4-613B23.5	3.18e-07	0.256558	0.612	0.5	0.00622566	0	RP4-613B23.5	corneal stroma
PIGA	2.02e-05	0.256451	0.382	0.277	0.396595	0	PIGA	corneal stroma
KCNB1	3.15e-10	0.256416	0.615	0.456	6.18e-06	0	KCNB1	corneal stroma
XPNPEP2	2.65e-11	0.256394	0.245	0.114	5.21e-07	0	XPNPEP2	corneal stroma
DUSP6	1.86e-06	0.255648	0.429	0.3	0.0364376	0	DUSP6	corneal stroma
PALD1	1.74e-11	0.255629	0.569	0.378	3.42e-07	0	PALD1	corneal stroma
ADAMTS1	4.1e-09	0.25546	0.548	0.37	8.03e-05	0	ADAMTS1	corneal stroma
UBASH3B	6.8e-09	0.255368	0.571	0.403	0.000133352	0	UBASH3B	corneal stroma
COQ8B	1.71e-06	0.255247	0.773	0.706	0.0334905	0	COQ8B	corneal stroma
HMP19	9.84e-08	0.255151	0.431	0.288	0.00192912	0	HMP19	corneal stroma
SLC16A12	3.45e-10	0.255079	0.353	0.203	6.76e-06	0	SLC16A12	corneal stroma
RCN2	0.000144593	0.254991	0.464	0.378	1	0	RCN2	corneal stroma
NRG2	1.19e-06	0.254922	0.522	0.398	0.0233706	0	NRG2	corneal stroma
MMS22L	0.000135225	0.254778	0.373	0.28	1	0	MMS22L	corneal stroma
NDUFAF2	0.000168907	0.254619	0.417	0.32	1	0	NDUFAF2	corneal stroma
TBCK	4.76e-08	0.254552	0.551	0.409	0.000933853	0	TBCK	corneal stroma
NRGN	5.69e-07	0.254372	0.376	0.252	0.0111491	0	NRGN	corneal stroma
ARHGEF3	1.23e-08	0.254287	0.671	0.544	0.00024147	0	ARHGEF3	corneal stroma
PHF21B	1.37e-09	0.254192	0.633	0.434	2.69e-05	0	PHF21B	corneal stroma
BTN2A2	4.31e-11	0.253675	0.251	0.12	8.45e-07	0	BTN2A2	corneal stroma
AGBL3	0.000131471	0.253617	0.37	0.277	1	0	AGBL3	corneal stroma
RP11-65B7.2	1.19e-11	0.253503	0.35	0.187	2.33e-07	0	RP11-65B7.2	corneal stroma
RPS17	7.5e-06	0.25333	0.458	0.367	0.146966	0	RPS17	corneal stroma
OSMR	7.38e-13	0.253256	0.364	0.195	1.45e-08	0	OSMR	corneal stroma
SGPL1	5.56e-09	0.253232	0.367	0.23	0.000109041	0	SGPL1	corneal stroma
HEG1	1.97e-07	0.252969	0.475	0.347	0.00386524	0	HEG1	corneal stroma
KLF2	3.85e-09	0.252614	0.408	0.25	7.54e-05	0	KLF2	corneal stroma
RP11-152F13.10	8.01e-06	0.252596	0.461	0.372	0.157058	0	RP11-152F13.10	corneal stroma
RERGL	4.98e-08	0.252522	0.292	0.173	0.000977212	0	RERGL	corneal stroma
INMT-FAM188B	1.99e-05	0.252428	0.542	0.446	0.390946	0	INMT-FAM188B	corneal stroma
MPP2	1.69e-07	0.252405	0.466	0.33	0.00332186	0	MPP2	corneal stroma
COL11A1	1.62e-08	0.252011	0.455	0.309	0.00031807	0	COL11A1	corneal stroma
BMP6	1.02e-07	0.252008	0.437	0.297	0.00199717	0	BMP6	corneal stroma
GDAP1	1.6e-06	0.25198	0.455	0.328	0.0314049	0	GDAP1	corneal stroma
ARHGAP29	3.99e-09	0.251977	0.44	0.286	7.82e-05	0	ARHGAP29	corneal stroma
MTERF1	7.25e-06	0.251784	0.446	0.33	0.142075	0	MTERF1	corneal stroma
CD276	1.01e-06	0.251621	0.35	0.234	0.0198211	0	CD276	corneal stroma
SFRP4	3.51e-07	0.251365	0.391	0.265	0.00687518	0	SFRP4	corneal stroma
VEGFC	1.08e-07	0.25111	0.315	0.19	0.00211981	0	VEGFC	corneal stroma
TLL2	5.63e-06	0.250845	0.542	0.426	0.110398	0	TLL2	corneal stroma
CHCHD6	0.00015734	0.250712	0.56	0.456	1	0	CHCHD6	corneal stroma
OSR1	1.08e-12	0.250582	0.265	0.123	2.11e-08	0	OSR1	corneal stroma
ARHGEF7	1.54e-06	0.250258	0.741	0.633	0.0301978	0	ARHGEF7	corneal stroma
SNRPF	4.65e-06	0.250098	0.379	0.272	0.0911076	0	SNRPF	corneal stroma
EPB41L2	7.61e-10	0.250089	0.656	0.47	1.49e-05	0	EPB41L2	corneal stroma
BMP7	7.78e-12	0.250073	0.557	0.346	1.53e-07	0	BMP7	corneal stroma
CAMK4	1.39e-07	0.250034	0.519	0.366	0.00273034	0	CAMK4	corneal stroma
CDK5R1	7.54e-07	-0.250024	0.248	0.385	0.0147787	0	CDK5R1	corneal stroma
GCN1	5.75e-07	-0.250047	0.19	0.32	0.0112735	0	GCN1	corneal stroma
LRRC42	1.36e-05	-0.250055	0.586	0.681	0.267612	0	LRRC42	corneal stroma
HDAC5	1.84e-05	-0.250062	0.525	0.646	0.360876	0	HDAC5	corneal stroma
CYB5R3	0.00049718	-0.250064	0.341	0.442	1	0	CYB5R3	corneal stroma
RNF114	3.26e-08	-0.250118	0.224	0.385	0.000638349	0	RNF114	corneal stroma
BRD3	1.77e-06	-0.250143	0.443	0.564	0.0347404	0	BRD3	corneal stroma
ZBTB4	2.36e-06	-0.250226	0.659	0.737	0.0463426	0	ZBTB4	corneal stroma
ALOX5	0.00446912	-0.250393	0.292	0.358	1	0	ALOX5	corneal stroma
KCTD6	3.42e-05	-0.250497	0.359	0.468	0.670257	0	KCTD6	corneal stroma
PC	0.000217467	-0.250536	0.708	0.771	1	0	PC	corneal stroma
SS18L1	4.57e-05	-0.250585	0.344	0.456	0.89537	0	SS18L1	corneal stroma
NDUFS7	4.13e-06	-0.250687	0.286	0.413	0.081038	0	NDUFS7	corneal stroma
RHBDL3	0.0017619	-0.250711	0.297	0.373	1	0	RHBDL3	corneal stroma
ABCA2	1.64e-06	-0.250872	0.239	0.377	0.0321301	0	ABCA2	corneal stroma
ATG2B	2.59e-05	-0.250937	0.338	0.455	0.507981	0	ATG2B	corneal stroma
HTATIP2	3.21e-10	-0.251099	0.055	0.196	6.29e-06	0	HTATIP2	corneal stroma
TMEM14B	4.32e-07	-0.251238	0.446	0.585	0.00847225	0	TMEM14B	corneal stroma
PTPN23	6.05e-07	-0.251527	0.423	0.563	0.0118622	0	PTPN23	corneal stroma
SEZ6L2	1.25e-07	-0.251571	0.192	0.336	0.00244759	0	SEZ6L2	corneal stroma
H3F3B	9.68e-05	-0.251626	0.7	0.744	1	0	H3F3B	corneal stroma
AP5B1	7.77e-05	-0.251715	0.19	0.28	1	0	AP5B1	corneal stroma
SS18L2	0.00215926	-0.251732	0.542	0.597	1	0	SS18L2	corneal stroma
PABPN1	2.9e-07	-0.251835	0.507	0.652	0.00568148	0	PABPN1	corneal stroma
B3GAT3	3.14e-07	-0.251916	0.312	0.458	0.0061615	0	B3GAT3	corneal stroma
WHSC1	9.56e-05	-0.25197	0.569	0.651	1	0	WHSC1	corneal stroma
PFKFB4	9.94e-07	-0.252067	0.429	0.573	0.0194967	0	PFKFB4	corneal stroma
TMEM86A	9.59e-07	-0.252099	0.21	0.337	0.0188053	0	TMEM86A	corneal stroma
RP11-195F19.5	6.62e-07	-0.252113	0.353	0.494	0.0129723	0	RP11-195F19.5	corneal stroma
AGAP2	1.17e-05	-0.252236	0.289	0.407	0.22918	0	AGAP2	corneal stroma
CTSD	4.31e-09	-0.252333	0.131	0.284	8.46e-05	0	CTSD	corneal stroma
FAM35A	2.08e-05	-0.252392	0.303	0.43	0.407377	0	FAM35A	corneal stroma
WTAP	4.61e-07	-0.252416	0.458	0.602	0.00903234	0	WTAP	corneal stroma
KNDC1	8.39e-06	-0.252846	0.195	0.309	0.164508	0	KNDC1	corneal stroma
MSL1	1.33e-05	-0.253022	0.341	0.474	0.261732	0	MSL1	corneal stroma
PIP5K1B	4.96e-05	-0.253228	0.56	0.655	0.971583	0	PIP5K1B	corneal stroma
CTC-326K19.6	3.31e-06	-0.253266	0.42	0.544	0.0649488	0	CTC-326K19.6	corneal stroma
MRPL36	8.32e-05	-0.253278	0.239	0.33	1	0	MRPL36	corneal stroma
SCD	9.08e-05	-0.253417	0.271	0.375	1	0	SCD	corneal stroma
RP11-214K3.25	0.00024661	-0.253436	0.574	0.663	1	0	RP11-214K3.25	corneal stroma
CCNJL	0.000105119	-0.253497	0.332	0.43	1	0	CCNJL	corneal stroma
STK17B	0.000837089	-0.253623	0.338	0.423	1	0	STK17B	corneal stroma
AKR7A2	2.19e-07	-0.253729	0.3	0.462	0.00429679	0	AKR7A2	corneal stroma
PPP2R2A	4.6e-06	-0.253737	0.35	0.485	0.0901227	0	PPP2R2A	corneal stroma
TCTA	2.1e-05	-0.253853	0.516	0.626	0.41154	0	TCTA	corneal stroma
PHF1	8.59e-06	-0.253904	0.528	0.646	0.168357	0	PHF1	corneal stroma
CRKL	6.58e-06	-0.254142	0.461	0.581	0.129046	0	CRKL	corneal stroma
AC138028.1	6.21e-09	-0.254181	0.082	0.213	0.00012178	0	AC138028.1	corneal stroma
FBXL12	3.16e-06	-0.254214	0.627	0.717	0.0619298	0	FBXL12	corneal stroma
CLIC4	1.47e-05	-0.254243	0.545	0.648	0.288442	0	CLIC4	corneal stroma
WDR82	0.000489354	-0.254308	0.557	0.621	1	0	WDR82	corneal stroma
TACC3	6.29e-09	-0.254337	0.289	0.472	0.000123273	0	TACC3	corneal stroma
MTG1	2.17e-07	-0.254383	0.239	0.381	0.00426081	0	MTG1	corneal stroma
RP11-108K14.8	5.11e-07	-0.254461	0.248	0.384	0.0100185	0	RP11-108K14.8	corneal stroma
TRMO	1.67e-07	-0.254534	0.35	0.492	0.00327182	0	TRMO	corneal stroma
DIDO1	0.000103716	-0.25477	0.606	0.675	1	0	DIDO1	corneal stroma
UTP18	1.2e-05	-0.254818	0.487	0.594	0.234814	0	UTP18	corneal stroma
GBGT1	6.81e-08	-0.254872	0.064	0.177	0.00133593	0	GBGT1	corneal stroma
TKT	7.98e-06	-0.254882	0.329	0.443	0.156373	0	TKT	corneal stroma
MAML1	0.000443029	-0.255142	0.638	0.714	1	0	MAML1	corneal stroma
USP32	5.73e-05	-0.255178	0.627	0.724	1	0	USP32	corneal stroma
ASMTL	0.000146587	-0.255225	0.536	0.625	1	0	ASMTL	corneal stroma
CSTB	2.14e-08	-0.255356	0.155	0.298	0.000419486	0	CSTB	corneal stroma
LRRC29	3.84e-07	-0.25539	0.254	0.391	0.00752104	0	LRRC29	corneal stroma
PEX10	1.91e-07	-0.255408	0.318	0.475	0.00375143	0	PEX10	corneal stroma
MAP3K9	1.11e-05	-0.255494	0.242	0.365	0.218337	0	MAP3K9	corneal stroma
TRAF4	2.85e-06	-0.255516	0.376	0.501	0.0559313	0	TRAF4	corneal stroma
UBB	1.04e-06	-0.255525	0.335	0.475	0.0203079	0	UBB	corneal stroma
MYLIP	3.46e-05	-0.255554	0.411	0.525	0.679143	0	MYLIP	corneal stroma
OARD1	1.44e-05	-0.255861	0.755	0.811	0.282444	0	OARD1	corneal stroma
ABCB9	5.39e-05	-0.256338	0.571	0.669	1	0	ABCB9	corneal stroma
EIF4A3	3.3e-07	-0.256407	0.254	0.391	0.00647032	0	EIF4A3	corneal stroma
BCL6B	2.48e-09	-0.256457	0.087	0.229	4.86e-05	0	BCL6B	corneal stroma
FAM96A	1.72e-06	-0.256538	0.37	0.513	0.0337633	0	FAM96A	corneal stroma
SLC25A39	1.78e-05	-0.256782	0.306	0.422	0.349771	0	SLC25A39	corneal stroma
ZNF48	7.5e-06	-0.256798	0.618	0.735	0.147116	0	ZNF48	corneal stroma
CPTP	4.11e-08	-0.2568	0.227	0.379	0.000806096	0	CPTP	corneal stroma
JOSD1	8.39e-07	-0.256851	0.385	0.524	0.0164414	0	JOSD1	corneal stroma
KMT2B	7.22e-06	-0.256929	0.493	0.609	0.141636	0	KMT2B	corneal stroma
BCL2L2	1.35e-05	-0.256946	0.685	0.774	0.264287	0	BCL2L2	corneal stroma
DENND3	0.00137812	-0.25699	0.443	0.509	1	0	DENND3	corneal stroma
KRI1	9.35e-08	-0.25726	0.332	0.485	0.00183233	0	KRI1	corneal stroma
TBL1XR1	0.00109412	-0.257291	0.551	0.639	1	0	TBL1XR1	corneal stroma
VAMP2	1.52e-07	-0.257425	0.198	0.337	0.00297831	0	VAMP2	corneal stroma
BAD	2.87e-06	-0.257627	0.679	0.787	0.0561943	0	BAD	corneal stroma
MADD	1.27e-06	-0.257727	0.42	0.565	0.0249263	0	MADD	corneal stroma
CDK9	3.1e-06	-0.257856	0.449	0.581	0.0607038	0	CDK9	corneal stroma
CDKN2C	0.000453702	-0.257965	0.408	0.506	1	0	CDKN2C	corneal stroma
USF2	3.87e-06	-0.257985	0.362	0.486	0.0759056	0	USF2	corneal stroma
C19orf68	8.88e-06	-0.258109	0.478	0.583	0.174142	0	C19orf68	corneal stroma
HECTD4	0.00178503	-0.25811	0.487	0.58	1	0	HECTD4	corneal stroma
USB1	3.01e-06	-0.258171	0.341	0.478	0.0590721	0	USB1	corneal stroma
PRCC	5.73e-05	-0.258425	0.729	0.798	1	0	PRCC	corneal stroma
TMEM208	1.89e-07	-0.258429	0.219	0.359	0.00370439	0	TMEM208	corneal stroma
PICALM	2.55e-05	-0.258474	0.56	0.672	0.49999	0	PICALM	corneal stroma
ATG9A	8.14e-05	-0.258544	0.638	0.735	1	0	ATG9A	corneal stroma
PPP2CA	1.99e-06	-0.258707	0.528	0.658	0.0390683	0	PPP2CA	corneal stroma
AC002310.11	0.000222478	-0.258717	0.569	0.652	1	0	AC002310.11	corneal stroma
RAVER1	4.19e-06	-0.258719	0.458	0.578	0.0820905	0	RAVER1	corneal stroma
NAT10	2.11e-08	-0.258785	0.271	0.444	0.000413592	0	NAT10	corneal stroma
RPL26L1	1.24e-07	-0.258815	0.219	0.361	0.00242193	0	RPL26L1	corneal stroma
CTBP2	0.000902531	-0.258883	0.784	0.801	1	0	CTBP2	corneal stroma
CAPZA2	1.06e-06	-0.258924	0.411	0.552	0.0207149	0	CAPZA2	corneal stroma
CARM1	2.89e-07	-0.258952	0.691	0.798	0.00566038	0	CARM1	corneal stroma
MAMDC4	7.33e-06	-0.259035	0.472	0.599	0.143676	0	MAMDC4	corneal stroma
SH2D6	1.11e-06	-0.259105	0.321	0.459	0.0217199	0	SH2D6	corneal stroma
PQLC2	1.25e-08	-0.259114	0.297	0.473	0.000244686	0	PQLC2	corneal stroma
HPS6	3.13e-08	-0.259529	0.175	0.322	0.000613879	0	HPS6	corneal stroma
FOXRED2	3.78e-08	-0.259585	0.163	0.303	0.000741739	0	FOXRED2	corneal stroma
SLC11A1	1.79e-06	-0.259734	0.356	0.485	0.0351682	0	SLC11A1	corneal stroma
RGCC	0.00145533	-0.259875	0.227	0.304	1	0	RGCC	corneal stroma
POU6F1	1.05e-05	-0.259928	0.224	0.337	0.205735	0	POU6F1	corneal stroma
CA5B	3.25e-05	-0.260073	0.242	0.352	0.637521	0	CA5B	corneal stroma
SNX1	1.28e-05	-0.260364	0.464	0.583	0.251798	0	SNX1	corneal stroma
L2HGDH	3.53e-06	-0.260406	0.399	0.528	0.069161	0	L2HGDH	corneal stroma
AC129492.1	0.00020978	-0.260462	0.289	0.384	1	0	AC129492.1	corneal stroma
CAPNS1	4.34e-08	-0.260549	0.329	0.494	0.000851748	0	CAPNS1	corneal stroma
GATS	7.66e-10	-0.260716	0.306	0.493	1.5e-05	0	GATS	corneal stroma
ZNF696	1.13e-07	-0.260878	0.224	0.372	0.00222074	0	ZNF696	corneal stroma
CS	1.01e-07	-0.261147	0.362	0.519	0.00197654	0	CS	corneal stroma
GKAP1	9.09e-08	-0.261297	0.192	0.342	0.00178151	0	GKAP1	corneal stroma
ATXN7L3	3.65e-07	-0.261388	0.548	0.68	0.00716113	0	ATXN7L3	corneal stroma
ZSCAN10	2.46e-10	-0.261486	0.085	0.234	4.82e-06	0	ZSCAN10	corneal stroma
ATP5S	1.61e-05	-0.26166	0.429	0.546	0.315313	0	ATP5S	corneal stroma
NME4	6.38e-07	-0.261795	0.356	0.504	0.0125104	0	NME4	corneal stroma
TPM3	9.7e-06	-0.262057	0.321	0.445	0.190218	0	TPM3	corneal stroma
STK25	3.19e-07	-0.262078	0.353	0.512	0.00625921	0	STK25	corneal stroma
GCK	2.31e-07	-0.262141	0.222	0.368	0.00453772	0	GCK	corneal stroma
GOLGA3	5.41e-06	-0.262147	0.329	0.463	0.106157	0	GOLGA3	corneal stroma
HMOX1	9.52e-07	-0.262195	0.111	0.225	0.0186643	0	HMOX1	corneal stroma
PPP1CA	1.44e-05	-0.262196	0.566	0.67	0.283041	0	PPP1CA	corneal stroma
ZNF333	8.45e-08	-0.262254	0.222	0.365	0.00165645	0	ZNF333	corneal stroma
CTD-3138B18.4	8.73e-06	-0.262296	0.534	0.648	0.171128	0	CTD-3138B18.4	corneal stroma
SRRM4	0.009638	-0.262309	0.23	0.283	1	0	SRRM4	corneal stroma
PGP	3.25e-08	-0.262333	0.373	0.534	0.000637827	0	PGP	corneal stroma
CPEB4	0.000374512	-0.26236	0.504	0.598	1	0	CPEB4	corneal stroma
UROD	1.03e-05	-0.262514	0.306	0.419	0.202193	0	UROD	corneal stroma
LNPEP	4.34e-06	-0.262536	0.501	0.612	0.0850253	0	LNPEP	corneal stroma
ARIH2	2.7e-06	-0.262652	0.306	0.44	0.0529753	0	ARIH2	corneal stroma
CELF6	1.75e-05	-0.262665	0.268	0.381	0.343382	0	CELF6	corneal stroma
ZNF8	4.35e-09	-0.262736	0.271	0.443	8.53e-05	0	ZNF8	corneal stroma
RIMS3	9.54e-09	-0.262833	0.195	0.358	0.000186968	0	RIMS3	corneal stroma
RP11-644F5.10	2.29e-07	-0.262852	0.259	0.412	0.00449657	0	RP11-644F5.10	corneal stroma
DOK1	8.55e-06	-0.262965	0.274	0.403	0.167588	0	DOK1	corneal stroma
RHOA	4.82e-05	-0.263101	0.566	0.664	0.94577	0	RHOA	corneal stroma
ABHD4	1.78e-08	-0.263144	0.114	0.249	0.000348741	0	ABHD4	corneal stroma
CARD19	2.02e-06	-0.26322	0.554	0.69	0.0395981	0	CARD19	corneal stroma
GAPVD1	4.96e-08	-0.263274	0.257	0.412	0.000973032	0	GAPVD1	corneal stroma
PRR19	8.73e-07	-0.263374	0.283	0.415	0.0171146	0	PRR19	corneal stroma
RECQL5	1.05e-08	-0.263472	0.397	0.539	0.000206496	0	RECQL5	corneal stroma
CREBZF	8.25e-07	-0.263543	0.309	0.456	0.0161783	0	CREBZF	corneal stroma
CCNL2	2.4e-07	-0.263574	0.303	0.453	0.00471323	0	CCNL2	corneal stroma
BCL2L2-PABPN1	2.49e-07	-0.263709	0.586	0.713	0.00488456	0	BCL2L2-PABPN1	corneal stroma
PTOV1	6.11e-07	-0.263727	0.394	0.529	0.0119782	0	PTOV1	corneal stroma
FBXO46	1.77e-06	-0.263833	0.452	0.598	0.0346299	0	FBXO46	corneal stroma
SET	4.54e-05	-0.263863	0.516	0.612	0.890843	0	SET	corneal stroma
PRKD2	0.000137659	-0.263922	0.466	0.579	1	0	PRKD2	corneal stroma
MYH9	2.72e-05	-0.263955	0.636	0.734	0.534154	0	MYH9	corneal stroma
CMC4	2.34e-11	-0.264172	0.152	0.333	4.58e-07	0	CMC4	corneal stroma
SIRT7	4.82e-10	-0.264282	0.108	0.264	9.45e-06	0	SIRT7	corneal stroma
WBP2	2.77e-07	-0.264377	0.522	0.653	0.00543428	0	WBP2	corneal stroma
CTC-435M10.3	0.000201491	-0.264537	0.703	0.751	1	0	CTC-435M10.3	corneal stroma
GOLGA2	5.02e-07	-0.264709	0.426	0.566	0.00984289	0	GOLGA2	corneal stroma
LONRF3	2.33e-05	-0.264986	0.137	0.234	0.457283	0	LONRF3	corneal stroma
AIMP2	7.35e-06	-0.265033	0.402	0.515	0.144173	0	AIMP2	corneal stroma
SP3	1.91e-05	-0.265188	0.638	0.708	0.374338	0	SP3	corneal stroma
TEC	0.000594085	-0.26519	0.262	0.347	1	0	TEC	corneal stroma
PSMA7	2.3e-05	-0.265247	0.286	0.395	0.451361	0	PSMA7	corneal stroma
E4F1	1.38e-06	-0.265354	0.362	0.504	0.0270473	0	E4F1	corneal stroma
PLEK2	5.51e-09	-0.265427	0.05	0.17	0.000107947	0	PLEK2	corneal stroma
APOBEC3A	0.000322532	-0.26544	0.143	0.221	1	0	APOBEC3A	corneal stroma
KLHDC4	3.71e-05	-0.265503	0.242	0.345	0.727706	0	KLHDC4	corneal stroma
ATP2B1	3.91e-05	-0.265554	0.697	0.778	0.766908	0	ATP2B1	corneal stroma
SYCE3	2.98e-09	-0.26569	0.14	0.294	5.85e-05	0	SYCE3	corneal stroma
APOLD1	0.000182304	-0.265814	0.697	0.756	1	0	APOLD1	corneal stroma
COPS7A	3.71e-09	-0.265839	0.233	0.4	7.28e-05	0	COPS7A	corneal stroma
UBE2F-SCLY	0.000749864	-0.265885	0.636	0.706	1	0	UBE2F-SCLY	corneal stroma
RNF38	4.08e-05	-0.265959	0.638	0.702	0.800921	0	RNF38	corneal stroma
TUFT1	1.2e-06	-0.266005	0.277	0.416	0.0234731	0	TUFT1	corneal stroma
GZF1	1.51e-06	-0.266166	0.469	0.612	0.0296777	0	GZF1	corneal stroma
STXBP3	1.12e-06	-0.266444	0.359	0.501	0.0219579	0	STXBP3	corneal stroma
PDDC1	3.16e-06	-0.266456	0.257	0.377	0.0619011	0	PDDC1	corneal stroma
BSDC1	1.56e-05	-0.266554	0.455	0.566	0.306188	0	BSDC1	corneal stroma
RNF187	7.02e-06	-0.266605	0.248	0.369	0.13768	0	RNF187	corneal stroma
MRPL34	4.83e-06	-0.266674	0.501	0.626	0.0946672	0	MRPL34	corneal stroma
LGR4	0.00260223	-0.266713	0.536	0.583	1	0	LGR4	corneal stroma
DGKQ	2.01e-06	-0.266813	0.347	0.479	0.0394303	0	DGKQ	corneal stroma
POR	1.76e-05	-0.266849	0.493	0.616	0.344966	0	POR	corneal stroma
RP11-849F2.7	2.46e-07	-0.267015	0.394	0.549	0.00482713	0	RP11-849F2.7	corneal stroma
ATP4A	1.52e-08	-0.267057	0.102	0.238	0.00029824	0	ATP4A	corneal stroma
PLOD3	1.09e-07	-0.267262	0.233	0.385	0.0021393	0	PLOD3	corneal stroma
HNRNPH1	2.64e-07	-0.267272	0.475	0.615	0.00516801	0	HNRNPH1	corneal stroma
SENP3-EIF4A1	7.79e-06	-0.267559	0.673	0.762	0.152785	0	SENP3-EIF4A1	corneal stroma
FAM117A	0.000561503	-0.267702	0.781	0.795	1	0	FAM117A	corneal stroma
SPPL3	1.43e-05	-0.267716	0.37	0.49	0.279608	0	SPPL3	corneal stroma
CENPT	4.03e-05	-0.267752	0.671	0.752	0.789335	0	CENPT	corneal stroma
PAFAH1B3	2.61e-07	-0.267831	0.283	0.424	0.00510846	0	PAFAH1B3	corneal stroma
SLC43A2	1.58e-06	-0.268171	0.429	0.569	0.0309796	0	SLC43A2	corneal stroma
TOM1	5.66e-07	-0.268214	0.461	0.594	0.0110988	0	TOM1	corneal stroma
MTCP1	1.09e-10	-0.268271	0.187	0.366	2.13e-06	0	MTCP1	corneal stroma
TSGA10	0.000328204	-0.268274	0.531	0.611	1	0	TSGA10	corneal stroma
MLF2	4.65e-06	-0.268282	0.723	0.816	0.0911109	0	MLF2	corneal stroma
GBAS	2.65e-07	-0.268303	0.309	0.45	0.0051964	0	GBAS	corneal stroma
HNRNPK	7.73e-07	-0.268433	0.536	0.687	0.0151508	0	HNRNPK	corneal stroma
SIGMAR1	2.84e-08	-0.268466	0.181	0.33	0.000557466	0	SIGMAR1	corneal stroma
ZFP90	1.26e-07	-0.268579	0.265	0.419	0.00247809	0	ZFP90	corneal stroma
USP38	3.58e-06	-0.268822	0.312	0.44	0.0702365	0	USP38	corneal stroma
PFKFB2	9.39e-05	-0.26889	0.347	0.454	1	0	PFKFB2	corneal stroma
PTTG1IP	4.13e-07	-0.268922	0.329	0.466	0.00810089	0	PTTG1IP	corneal stroma
COX19	3.7e-07	-0.268938	0.437	0.578	0.00724539	0	COX19	corneal stroma
TMEM56-RWDD3	0.00314797	-0.269103	0.464	0.515	1	0	TMEM56-RWDD3	corneal stroma
LRRFIP2	4.16e-05	-0.269234	0.329	0.44	0.814738	0	LRRFIP2	corneal stroma
C2orf42	2.13e-06	-0.2693	0.534	0.652	0.0417444	0	C2orf42	corneal stroma
APOBEC3D	1.59e-07	-0.269375	0.137	0.263	0.00311714	0	APOBEC3D	corneal stroma
LARP1B	2.13e-05	-0.269431	0.382	0.508	0.417523	0	LARP1B	corneal stroma
USP42	7.14e-07	-0.26964	0.504	0.642	0.0140024	0	USP42	corneal stroma
MBLAC1	2.82e-07	-0.269852	0.309	0.458	0.00552811	0	MBLAC1	corneal stroma
ACACA	0.000139277	-0.269993	0.641	0.707	1	0	ACACA	corneal stroma
ZNF382	5.37e-08	-0.27009	0.131	0.265	0.00105243	0	ZNF382	corneal stroma
RMI1	6.06e-07	-0.270146	0.531	0.686	0.0118753	0	RMI1	corneal stroma
SMIM5	8.79e-10	-0.270181	0.166	0.333	1.72e-05	0	SMIM5	corneal stroma
ZNF568	4.25e-07	-0.270208	0.315	0.457	0.0083234	0	ZNF568	corneal stroma
B4GALT3	3.64e-08	-0.270285	0.268	0.428	0.000713872	0	B4GALT3	corneal stroma
MIEF1	1.37e-09	-0.270373	0.222	0.394	2.69e-05	0	MIEF1	corneal stroma
DEGS1	2.98e-07	-0.270433	0.257	0.396	0.00584734	0	DEGS1	corneal stroma
GNPTG	2.14e-10	-0.2705	0.12	0.281	4.2e-06	0	GNPTG	corneal stroma
APH1B	9.91e-09	-0.270503	0.204	0.359	0.000194239	0	APH1B	corneal stroma
ADPRHL2	1.53e-09	-0.270576	0.195	0.365	3.01e-05	0	ADPRHL2	corneal stroma
DNAJC16	3.24e-07	-0.270844	0.633	0.754	0.0063575	0	DNAJC16	corneal stroma
TMEM189-UBE2V1	0.000155225	-0.270891	0.598	0.67	1	0	TMEM189-UBE2V1	corneal stroma
NSD1	0.000218958	-0.270981	0.516	0.612	1	0	NSD1	corneal stroma
HADHA	8.34e-08	-0.271093	0.254	0.41	0.00163469	0	HADHA	corneal stroma
YWHAH	1.97e-06	-0.271134	0.417	0.551	0.0385307	0	YWHAH	corneal stroma
PSMG1	1.11e-05	-0.271249	0.391	0.502	0.218174	0	PSMG1	corneal stroma
RPS27L	6.22e-05	-0.271573	0.254	0.344	1	0	RPS27L	corneal stroma
IMPDH2	4.25e-08	-0.271615	0.23	0.373	0.000834077	0	IMPDH2	corneal stroma
LPCAT4	2.71e-06	-0.27162	0.335	0.462	0.0531024	0	LPCAT4	corneal stroma
CTXN1	4.4e-08	-0.271751	0.195	0.34	0.000861892	0	CTXN1	corneal stroma
ZNF576	1.11e-07	-0.271808	0.367	0.528	0.00218065	0	ZNF576	corneal stroma
ARID1A	1.62e-05	-0.271858	0.738	0.797	0.318118	0	ARID1A	corneal stroma
SMYD5	2.58e-10	-0.27186	0.102	0.259	5.06e-06	0	SMYD5	corneal stroma
SLC25A1	4.22e-07	-0.271878	0.321	0.463	0.00827781	0	SLC25A1	corneal stroma
GRSF1	1.65e-07	-0.27219	0.315	0.466	0.0032445	0	GRSF1	corneal stroma
MCRIP2	7.47e-08	-0.272201	0.437	0.584	0.00146477	0	MCRIP2	corneal stroma
OSBPL2	5.14e-05	-0.272216	0.464	0.56	1	0	OSBPL2	corneal stroma
ANKRD18B	7.67e-08	-0.27223	0.117	0.246	0.00150361	0	ANKRD18B	corneal stroma
ATP5D	1.47e-08	-0.272259	0.35	0.502	0.000288997	0	ATP5D	corneal stroma
NR2F6	0.000332888	-0.272276	0.411	0.496	1	0	NR2F6	corneal stroma
TSC22D4	1.6e-05	-0.272392	0.379	0.496	0.313147	0	TSC22D4	corneal stroma
ATG4B	5.57e-05	-0.272495	0.359	0.474	1	0	ATG4B	corneal stroma
AAAS	3.6e-06	-0.272529	0.446	0.57	0.0705729	0	AAAS	corneal stroma
PAPD5	0.00178338	-0.272614	0.51	0.587	1	0	PAPD5	corneal stroma
LMO2	3.02e-06	-0.27278	0.146	0.264	0.0592157	0	LMO2	corneal stroma
GFER	1.01e-06	-0.27287	0.286	0.412	0.0198586	0	GFER	corneal stroma
H1FX	7.93e-08	-0.272904	0.283	0.438	0.00155484	0	H1FX	corneal stroma
RAB14	6.42e-06	-0.272917	0.443	0.559	0.125907	0	RAB14	corneal stroma
CDS2	6.88e-06	-0.272989	0.49	0.597	0.134886	0	CDS2	corneal stroma
B3GALT4	2.92e-09	-0.272996	0.12	0.264	5.72e-05	0	B3GALT4	corneal stroma
ZC3HAV1	0.000857641	-0.273111	0.248	0.322	1	0	ZC3HAV1	corneal stroma
PHPT1	9.55e-06	-0.273207	0.525	0.636	0.187233	0	PHPT1	corneal stroma
TNFAIP8L1	5.83e-10	-0.273266	0.219	0.403	1.14e-05	0	TNFAIP8L1	corneal stroma
B9D1	1.81e-07	-0.2733	0.697	0.792	0.00354759	0	B9D1	corneal stroma
RP11-73M18.2	5.73e-06	-0.273304	0.615	0.719	0.11234	0	RP11-73M18.2	corneal stroma
RINL	6.12e-11	-0.273824	0.096	0.257	1.2e-06	0	RINL	corneal stroma
BEST1	3.63e-05	-0.273981	0.286	0.4	0.710791	0	BEST1	corneal stroma
PRR7	1.11e-05	-0.274301	0.472	0.575	0.217313	0	PRR7	corneal stroma
CLP1	4.41e-06	-0.274373	0.475	0.601	0.0864896	0	CLP1	corneal stroma
EXOSC8	2.32e-05	-0.274379	0.405	0.507	0.454873	0	EXOSC8	corneal stroma
PNRC1	6.63e-07	-0.274563	0.542	0.67	0.0129997	0	PNRC1	corneal stroma
RP11-729L2.2	4.97e-05	-0.274646	0.472	0.578	0.975079	0	RP11-729L2.2	corneal stroma
ARIH2OS	3.87e-06	-0.274659	0.248	0.368	0.0758349	0	ARIH2OS	corneal stroma
TMEM179B	2.39e-06	-0.274788	0.329	0.463	0.0469333	0	TMEM179B	corneal stroma
HADHB	9.22e-08	-0.274883	0.236	0.387	0.00180704	0	HADHB	corneal stroma
MTMR3	2.54e-05	-0.275062	0.44	0.544	0.498288	0	MTMR3	corneal stroma
BTBD2	1.67e-08	-0.275085	0.248	0.417	0.000327586	0	BTBD2	corneal stroma
NIM1K	2.02e-06	-0.275105	0.254	0.384	0.0395545	0	NIM1K	corneal stroma
LOXL3	1.32e-05	-0.27553	0.294	0.419	0.258554	0	LOXL3	corneal stroma
SLC6A8	8.59e-08	-0.275733	0.192	0.337	0.00168484	0	SLC6A8	corneal stroma
RNF19A	2.23e-06	-0.275836	0.426	0.557	0.043818	0	RNF19A	corneal stroma
KMT5A	3.55e-06	-0.275918	0.609	0.697	0.0695879	0	KMT5A	corneal stroma
KIAA0895L	1.12e-05	-0.275952	0.478	0.586	0.219454	0	KIAA0895L	corneal stroma
BTG1	5.86e-06	-0.276022	0.592	0.701	0.114846	0	BTG1	corneal stroma
NUDT22	7.83e-07	-0.276026	0.356	0.493	0.0153554	0	NUDT22	corneal stroma
MINK1	2.8e-05	-0.276714	0.399	0.506	0.549758	0	MINK1	corneal stroma
IRGQ	8.18e-08	-0.276729	0.37	0.538	0.00160313	0	IRGQ	corneal stroma
ZNF672	4.2e-06	-0.276755	0.554	0.677	0.0823915	0	ZNF672	corneal stroma
TPRN	8.55e-06	-0.276784	0.466	0.575	0.167735	0	TPRN	corneal stroma
PAFAH1B2	7.57e-07	-0.277002	0.297	0.438	0.0148506	0	PAFAH1B2	corneal stroma
UXT	2.25e-10	-0.277017	0.192	0.364	4.41e-06	0	UXT	corneal stroma
NUP62	1.37e-07	-0.277207	0.344	0.496	0.00268877	0	NUP62	corneal stroma
PLD6	4.34e-07	-0.27722	0.134	0.256	0.00850693	0	PLD6	corneal stroma
TMEM91	0.000189595	-0.277486	0.571	0.64	1	0	TMEM91	corneal stroma
ZNF398	0.00124642	-0.277516	0.557	0.627	1	0	ZNF398	corneal stroma
NT5C	7.58e-07	-0.277525	0.207	0.333	0.0148554	0	NT5C	corneal stroma
AZIN1	1.66e-05	-0.277581	0.545	0.67	0.325635	0	AZIN1	corneal stroma
KCTD20	1.18e-05	-0.277886	0.341	0.456	0.23043	0	KCTD20	corneal stroma
RIIAD1	7.05e-08	-0.27807	0.187	0.324	0.00138253	0	RIIAD1	corneal stroma
UBL4A	3.05e-11	-0.278141	0.067	0.22	5.98e-07	0	UBL4A	corneal stroma
ACBD3	2.49e-07	-0.278378	0.204	0.345	0.00488884	0	ACBD3	corneal stroma
WBP4	5.96e-06	-0.278612	0.504	0.613	0.116836	0	WBP4	corneal stroma
ENGASE	6.7e-07	-0.278635	0.262	0.384	0.0131313	0	ENGASE	corneal stroma
IKZF5	1.35e-06	-0.278841	0.315	0.448	0.0265554	0	IKZF5	corneal stroma
SURF1	1.47e-08	-0.278869	0.163	0.313	0.000288423	0	SURF1	corneal stroma
PITPNA	2.93e-06	-0.278893	0.318	0.437	0.0573818	0	PITPNA	corneal stroma
VDAC2	6.19e-06	-0.278959	0.391	0.508	0.121369	0	VDAC2	corneal stroma
SCAP	2.26e-09	-0.279008	0.297	0.477	4.43e-05	0	SCAP	corneal stroma
ZFAND2B	7.43e-09	-0.27956	0.356	0.536	0.000145703	0	ZFAND2B	corneal stroma
AIM1L	8.53e-10	-0.279901	0.087	0.237	1.67e-05	0	AIM1L	corneal stroma
ARHGAP12	2.94e-05	-0.279905	0.373	0.499	0.577282	0	ARHGAP12	corneal stroma
ARL2BP	7.22e-07	-0.280188	0.341	0.48	0.0141651	0	ARL2BP	corneal stroma
BSG	4.84e-08	-0.280299	0.382	0.533	0.000949752	0	BSG	corneal stroma
C14orf28	5.15e-11	-0.28048	0.227	0.428	1.01e-06	0	C14orf28	corneal stroma
NRBP1	2.35e-08	-0.280531	0.385	0.549	0.000461656	0	NRBP1	corneal stroma
ZNF592	3.4e-05	-0.280637	0.35	0.468	0.667068	0	ZNF592	corneal stroma
C8G	1.72e-09	-0.280807	0.254	0.429	3.38e-05	0	C8G	corneal stroma
TARSL2	9.39e-05	-0.281025	0.35	0.461	1	0	TARSL2	corneal stroma
ZNF7	3.64e-07	-0.281175	0.51	0.653	0.00713269	0	ZNF7	corneal stroma
MYL12A	1.18e-05	-0.282388	0.364	0.482	0.230742	0	MYL12A	corneal stroma
FAM122A	5.76e-09	-0.282405	0.19	0.348	0.000113019	0	FAM122A	corneal stroma
ZBTB26	6.65e-09	-0.282477	0.172	0.327	0.000130376	0	ZBTB26	corneal stroma
TSN	2.55e-06	-0.282486	0.563	0.678	0.0500162	0	TSN	corneal stroma
FXR1	1.08e-06	-0.282498	0.35	0.476	0.0212202	0	FXR1	corneal stroma
PRDX6	1.04e-06	-0.282508	0.347	0.472	0.0204252	0	PRDX6	corneal stroma
PCDH1	0.000215442	-0.282589	0.239	0.333	1	0	PCDH1	corneal stroma
BRCC3	3.14e-11	-0.282649	0.169	0.348	6.15e-07	0	BRCC3	corneal stroma
PSMD9	8.19e-08	-0.282842	0.283	0.43	0.00160657	0	PSMD9	corneal stroma
DNAJC9	5.31e-09	-0.283225	0.236	0.398	0.000104135	0	DNAJC9	corneal stroma
MIEN1	8.72e-09	-0.283416	0.163	0.307	0.000171057	0	MIEN1	corneal stroma
UBIAD1	2.87e-09	-0.283445	0.257	0.426	5.63e-05	0	UBIAD1	corneal stroma
CHAC1	1.22e-08	-0.283567	0.172	0.315	0.000239152	0	CHAC1	corneal stroma
SRSF2	1.81e-06	-0.283621	0.589	0.696	0.0354109	0	SRSF2	corneal stroma
FBXW5	6.89e-10	-0.283676	0.251	0.432	1.35e-05	0	FBXW5	corneal stroma
NFKB2	0.000579802	-0.283732	0.598	0.662	1	0	NFKB2	corneal stroma
WDR90	2.24e-09	-0.283987	0.268	0.448	4.39e-05	0	WDR90	corneal stroma
PTGDS	3.17e-07	-0.284005	0.122	0.244	0.00621807	0	PTGDS	corneal stroma
C8orf82	1.97e-06	-0.284067	0.3	0.422	0.0387145	0	C8orf82	corneal stroma
THAP3	2.7e-08	-0.284085	0.204	0.347	0.000530212	0	THAP3	corneal stroma
LEPROTL1	8.6e-05	-0.284191	0.49	0.581	1	0	LEPROTL1	corneal stroma
ARL2	3.35e-06	-0.284224	0.35	0.475	0.065716	0	ARL2	corneal stroma
HIPK1	3.89e-05	-0.28445	0.423	0.531	0.761799	0	HIPK1	corneal stroma
MKRN1	1.8e-06	-0.284531	0.309	0.438	0.0353321	0	MKRN1	corneal stroma
FBXO31	3.47e-05	-0.284685	0.749	0.798	0.680892	0	FBXO31	corneal stroma
PGBD2	1.68e-06	-0.284722	0.394	0.545	0.0329697	0	PGBD2	corneal stroma
ENDOG	4.46e-09	-0.284742	0.236	0.409	8.75e-05	0	ENDOG	corneal stroma
SRRM5	3.82e-08	-0.284915	0.37	0.539	0.000748506	0	SRRM5	corneal stroma
SRSF3	7.92e-08	-0.284933	0.347	0.518	0.00155305	0	SRSF3	corneal stroma
SURF2	3.88e-08	-0.284935	0.181	0.324	0.000761168	0	SURF2	corneal stroma
ABCC5	2.88e-05	-0.284977	0.379	0.496	0.565135	0	ABCC5	corneal stroma
DMPK	1.27e-07	-0.285072	0.49	0.635	0.0024916	0	DMPK	corneal stroma
DYNLT1	1.88e-06	-0.285341	0.245	0.377	0.0368386	0	DYNLT1	corneal stroma
DIP2A	2.9e-05	-0.285375	0.501	0.608	0.568809	0	DIP2A	corneal stroma
WDR34	5.7e-09	-0.285396	0.283	0.453	0.000111671	0	WDR34	corneal stroma
MTA2	5.03e-06	-0.285458	0.496	0.607	0.0986052	0	MTA2	corneal stroma
C16orf72	0.000336959	-0.285468	0.647	0.693	1	0	C16orf72	corneal stroma
NDUFAF3	6.09e-07	-0.285548	0.496	0.609	0.0119339	0	NDUFAF3	corneal stroma
TMEM56	0.000130096	-0.285558	0.242	0.337	1	0	TMEM56	corneal stroma
YDJC	4.93e-09	-0.28562	0.198	0.359	9.66e-05	0	YDJC	corneal stroma
BAG3	4e-06	-0.285675	0.335	0.464	0.0785124	0	BAG3	corneal stroma
TPRA1	1.12e-06	-0.285928	0.525	0.653	0.0220552	0	TPRA1	corneal stroma
COX6B2	1.38e-07	-0.285989	0.14	0.267	0.00270418	0	COX6B2	corneal stroma
NFKBIA	5.51e-07	-0.286427	0.286	0.418	0.010796	0	NFKBIA	corneal stroma
VEGFB	8.04e-08	-0.286562	0.175	0.309	0.00157713	0	VEGFB	corneal stroma
TNPO1	4.91e-05	-0.28668	0.461	0.557	0.961843	0	TNPO1	corneal stroma
LRRC56	5.07e-08	-0.286788	0.335	0.499	0.000993434	0	LRRC56	corneal stroma
XPO7	0.000159098	-0.286855	0.394	0.482	1	0	XPO7	corneal stroma
NT5DC4	7.3e-09	-0.286901	0.076	0.205	0.00014308	0	NT5DC4	corneal stroma
LAGE3	1.14e-12	-0.286933	0.137	0.336	2.23e-08	0	LAGE3	corneal stroma
ZNHIT1	9.78e-09	-0.287061	0.216	0.378	0.00019173	0	ZNHIT1	corneal stroma
ZNF217	2.16e-06	-0.287226	0.449	0.57	0.0423516	0	ZNF217	corneal stroma
TTLL12	3.64e-06	-0.287863	0.431	0.56	0.0714613	0	TTLL12	corneal stroma
TXLNA	6.69e-08	-0.287926	0.332	0.483	0.00131096	0	TXLNA	corneal stroma
CYB561D1	3.5e-10	-0.287983	0.19	0.375	6.85e-06	0	CYB561D1	corneal stroma
UNC45A	5.42e-05	-0.288195	0.423	0.518	1	0	UNC45A	corneal stroma
PAIP1	2.18e-06	-0.288338	0.315	0.444	0.0428353	0	PAIP1	corneal stroma
S100A6	1.59e-08	-0.288365	0.082	0.208	0.000311818	0	S100A6	corneal stroma
PTGES3L-AARSD1	1.42e-10	-0.288515	0.204	0.391	2.78e-06	0	PTGES3L-AARSD1	corneal stroma
FKBP14	2.81e-07	-0.288607	0.335	0.487	0.00551214	0	FKBP14	corneal stroma
ZNF775	0.000611002	-0.288632	0.592	0.645	1	0	ZNF775	corneal stroma
CPOX	0.00239637	-0.28897	0.557	0.621	1	0	CPOX	corneal stroma
ST6GALNAC4	4.12e-08	-0.289083	0.315	0.474	0.000808639	0	ST6GALNAC4	corneal stroma
RP11-318A15.7	1.69e-06	-0.289105	0.592	0.697	0.0330719	0	RP11-318A15.7	corneal stroma
CERS2	4.05e-05	-0.289412	0.303	0.409	0.794671	0	CERS2	corneal stroma
FAM177A1	8.58e-09	-0.289458	0.327	0.494	0.000168198	0	FAM177A1	corneal stroma
STXBP2	2.39e-13	-0.289522	0.038	0.203	4.68e-09	0	STXBP2	corneal stroma
DNAJB6	2.92e-05	-0.28956	0.481	0.576	0.572474	0	DNAJB6	corneal stroma
LCN12	6.17e-09	-0.28967	0.169	0.323	0.00012104	0	LCN12	corneal stroma
ZBTB45	1.71e-06	-0.289677	0.423	0.572	0.0335061	0	ZBTB45	corneal stroma
FUT11	1.75e-07	-0.289694	0.268	0.407	0.00342667	0	FUT11	corneal stroma
PRRT1	0.000504512	-0.289852	0.429	0.502	1	0	PRRT1	corneal stroma
ADGRE3	1.43e-07	-0.289876	0.224	0.361	0.00279709	0	ADGRE3	corneal stroma
NOP9	3.56e-11	-0.289909	0.137	0.313	6.99e-07	0	NOP9	corneal stroma
TMEM8A	5.95e-11	-0.289939	0.163	0.342	1.17e-06	0	TMEM8A	corneal stroma
ST3GAL2	3.49e-08	-0.290362	0.668	0.779	0.00068409	0	ST3GAL2	corneal stroma
MAFA	6.44e-05	-0.290371	0.382	0.486	1	0	MAFA	corneal stroma
DAGLB	9.71e-06	-0.290618	0.49	0.605	0.190321	0	DAGLB	corneal stroma
AC002310.13	1.33e-06	-0.29088	0.429	0.56	0.0260086	0	AC002310.13	corneal stroma
ABCA3	6.1e-06	-0.290989	0.329	0.447	0.11955	0	ABCA3	corneal stroma
RAD23A	1.44e-09	-0.290992	0.271	0.436	2.82e-05	0	RAD23A	corneal stroma
LACTB	1.65e-08	-0.291207	0.213	0.366	0.000322722	0	LACTB	corneal stroma
TMEM102	2.4e-08	-0.291469	0.175	0.317	0.000471366	0	TMEM102	corneal stroma
CTD-2105E13.6	1.46e-08	-0.291576	0.131	0.271	0.0002866	0	CTD-2105E13.6	corneal stroma
MLST8	1.54e-10	-0.291707	0.254	0.441	3.02e-06	0	MLST8	corneal stroma
AKAP8	2.34e-07	-0.291819	0.531	0.665	0.00458822	0	AKAP8	corneal stroma
FAM110A	5.71e-06	-0.292021	0.329	0.441	0.111977	0	FAM110A	corneal stroma
RBX1	0.000107896	-0.292188	0.563	0.658	1	0	RBX1	corneal stroma
ISCA1	4.51e-07	-0.29226	0.373	0.515	0.00884896	0	ISCA1	corneal stroma
MIDN	3.62e-07	-0.292425	0.601	0.736	0.00710391	0	MIDN	corneal stroma
SLC35F5	7.52e-08	-0.292529	0.286	0.448	0.00147505	0	SLC35F5	corneal stroma
ZCCHC2	2.17e-05	-0.292538	0.656	0.736	0.426407	0	ZCCHC2	corneal stroma
GMPPA	1.72e-07	-0.292566	0.318	0.465	0.00337947	0	GMPPA	corneal stroma
KCNN4	3.18e-08	-0.293071	0.149	0.288	0.000623416	0	KCNN4	corneal stroma
RNF139	2.96e-06	-0.293202	0.472	0.589	0.0581243	0	RNF139	corneal stroma
RP11-106M3.2	0.000240215	-0.293393	0.44	0.529	1	0	RP11-106M3.2	corneal stroma
SREBF1	6.05e-08	-0.293406	0.501	0.655	0.00118718	0	SREBF1	corneal stroma
HBQ1	2.01e-11	-0.293415	0.067	0.225	3.94e-07	0	HBQ1	corneal stroma
FLOT2	2.82e-12	-0.293568	0.137	0.323	5.54e-08	0	FLOT2	corneal stroma
HAUS3	6.65e-08	-0.29408	0.356	0.504	0.001304	0	HAUS3	corneal stroma
ARHGAP33	2.4e-10	-0.294635	0.292	0.473	4.7e-06	0	ARHGAP33	corneal stroma
MLLT10	9.11e-05	-0.294652	0.723	0.76	1	0	MLLT10	corneal stroma
MGAT4B	0.000189405	-0.29522	0.332	0.428	1	0	MGAT4B	corneal stroma
UNC13D	3.19e-08	-0.295265	0.184	0.329	0.00062458	0	UNC13D	corneal stroma
ARL2-SNX15	1.04e-05	-0.295303	0.531	0.632	0.20312	0	ARL2-SNX15	corneal stroma
YIF1B	2.71e-08	-0.295389	0.341	0.5	0.000530876	0	YIF1B	corneal stroma
FGF22	3.08e-09	-0.295613	0.169	0.316	6.04e-05	0	FGF22	corneal stroma
KAT5	2.28e-08	-0.295802	0.353	0.497	0.000446455	0	KAT5	corneal stroma
ATF5	2.17e-08	-0.295941	0.321	0.481	0.000425066	0	ATF5	corneal stroma
LSM14B	1.07e-06	-0.295977	0.528	0.635	0.0210502	0	LSM14B	corneal stroma
NAT6	4.68e-09	-0.296054	0.464	0.623	9.18e-05	0	NAT6	corneal stroma
ZNF165	5.56e-05	-0.296137	0.213	0.31	1	0	ZNF165	corneal stroma
PRDX2	6.69e-10	-0.296581	0.152	0.312	1.31e-05	0	PRDX2	corneal stroma
LCOR	4.38e-05	-0.296801	0.571	0.664	0.858353	0	LCOR	corneal stroma
TSPAN17	9.63e-09	-0.29681	0.379	0.54	0.000188855	0	TSPAN17	corneal stroma
PTPRF	0.00216914	-0.297332	0.534	0.58	1	0	PTPRF	corneal stroma
KCNH4	5.36e-10	-0.297337	0.105	0.252	1.05e-05	0	KCNH4	corneal stroma
PUS1	1.34e-09	-0.297363	0.262	0.431	2.63e-05	0	PUS1	corneal stroma
RABIF	1.11e-08	-0.297566	0.294	0.461	0.000218176	0	RABIF	corneal stroma
SETX	4.4e-06	-0.297573	0.461	0.576	0.0862535	0	SETX	corneal stroma
SLC16A1	3e-07	-0.297605	0.344	0.481	0.00588692	0	SLC16A1	corneal stroma
HPS4	1.9e-08	-0.2977	0.294	0.451	0.000371729	0	HPS4	corneal stroma
UBE2R2	2.31e-07	-0.297841	0.464	0.612	0.00452112	0	UBE2R2	corneal stroma
KMT2E	4.48e-07	-0.297914	0.679	0.78	0.00879059	0	KMT2E	corneal stroma
FKRP	7.44e-07	-0.298006	0.309	0.431	0.0145944	0	FKRP	corneal stroma
ESRRA	3.42e-08	-0.298132	0.551	0.668	0.000670701	0	ESRRA	corneal stroma
ZNF652	1.36e-06	-0.298203	0.385	0.513	0.0266312	0	ZNF652	corneal stroma
MCRIP1	3.33e-08	-0.298249	0.254	0.404	0.000652783	0	MCRIP1	corneal stroma
PSME2	6.21e-07	-0.298326	0.525	0.648	0.0121834	0	PSME2	corneal stroma
DUSP18	2.82e-10	-0.298447	0.169	0.336	5.53e-06	0	DUSP18	corneal stroma
D2HGDH	7.19e-07	-0.298507	0.321	0.45	0.014102	0	D2HGDH	corneal stroma
FBXW4	1.49e-06	-0.298549	0.294	0.424	0.0291628	0	FBXW4	corneal stroma
PRR14	3.99e-10	-0.298583	0.408	0.588	7.81e-06	0	PRR14	corneal stroma
BZW1	3.69e-07	-0.298688	0.481	0.627	0.00723822	0	BZW1	corneal stroma
KDELR2	9.8e-07	-0.298982	0.42	0.553	0.0192128	0	KDELR2	corneal stroma
SH2D3A	8.44e-08	-0.298985	0.09	0.211	0.00165554	0	SH2D3A	corneal stroma
ZBTB24	1.32e-08	-0.299045	0.239	0.401	0.000258842	0	ZBTB24	corneal stroma
CDK2AP2	2.29e-10	-0.299089	0.262	0.45	4.48e-06	0	CDK2AP2	corneal stroma
SUN1	0.000278239	-0.299194	0.688	0.745	1	0	SUN1	corneal stroma
SOD1	2.78e-07	-0.299594	0.329	0.468	0.00545254	0	SOD1	corneal stroma
PAFAH1B1	9.43e-07	-0.299715	0.481	0.605	0.0184987	0	PAFAH1B1	corneal stroma
LPIN2	7.59e-05	-0.300777	0.548	0.642	1	0	LPIN2	corneal stroma
PLLP	1.14e-10	-0.301026	0.137	0.308	2.24e-06	0	PLLP	corneal stroma
DYNC1LI1	2.17e-07	-0.301114	0.373	0.519	0.00425072	0	DYNC1LI1	corneal stroma
HP1BP3	1.7e-07	-0.301126	0.484	0.612	0.00333967	0	HP1BP3	corneal stroma
ZBTB18	2.03e-07	-0.301278	0.58	0.707	0.00397543	0	ZBTB18	corneal stroma
HYAL3	3.77e-09	-0.301368	0.475	0.638	7.39e-05	0	HYAL3	corneal stroma
UBN1	2.34e-08	-0.301557	0.362	0.512	0.00045922	0	UBN1	corneal stroma
LRRC23	1.19e-06	-0.301582	0.624	0.759	0.0233591	0	LRRC23	corneal stroma
PDCD5	1.21e-07	-0.30168	0.239	0.379	0.00237032	0	PDCD5	corneal stroma
PCMT1	3.16e-09	-0.301799	0.265	0.437	6.2e-05	0	PCMT1	corneal stroma
LIN7B	8.13e-10	-0.301861	0.222	0.385	1.59e-05	0	LIN7B	corneal stroma
CD59	5.92e-06	-0.301864	0.539	0.652	0.116016	0	CD59	corneal stroma
STK10	0.00568368	-0.301882	0.542	0.59	1	0	STK10	corneal stroma
MFSD3	2.42e-06	-0.301886	0.341	0.476	0.0473783	0	MFSD3	corneal stroma
FRAT1	8.34e-07	-0.301947	0.257	0.381	0.0163471	0	FRAT1	corneal stroma
AP003419.11	4.37e-05	-0.30204	0.499	0.596	0.857654	0	AP003419.11	corneal stroma
PTMA	1.62e-06	-0.302098	0.741	0.815	0.0317864	0	PTMA	corneal stroma
PITPNM1	2.11e-08	-0.302109	0.3	0.458	0.000413201	0	PITPNM1	corneal stroma
REM2	1.33e-09	-0.302192	0.19	0.357	2.61e-05	0	REM2	corneal stroma
2009-03-01	1.36e-09	-0.302351	0.125	0.282	2.67e-05	0	2009-03-01	corneal stroma
ATP6V0D1	1.97e-09	-0.302503	0.373	0.55	3.85e-05	0	ATP6V0D1	corneal stroma
GCLC	4.36e-06	-0.302668	0.589	0.685	0.0854603	0	GCLC	corneal stroma
DDX54	2.1e-07	-0.302758	0.347	0.499	0.00412017	0	DDX54	corneal stroma
MCM9	2.01e-05	-0.302854	0.592	0.699	0.394952	0	MCM9	corneal stroma
MAP3K1	8.11e-07	-0.30302	0.306	0.443	0.0159092	0	MAP3K1	corneal stroma
FAXDC2	2.89e-07	-0.303184	0.641	0.746	0.00566214	0	FAXDC2	corneal stroma
SLC11A2	4.85e-07	-0.30319	0.329	0.459	0.00951894	0	SLC11A2	corneal stroma
COPS5	1.24e-06	-0.303239	0.344	0.481	0.0242932	0	COPS5	corneal stroma
PYGO2	1.25e-07	-0.303439	0.23	0.37	0.00244146	0	PYGO2	corneal stroma
MMS19	3.19e-05	-0.303559	0.563	0.652	0.624507	0	MMS19	corneal stroma
MNT	2.15e-08	-0.303804	0.851	0.884	0.000422167	0	MNT	corneal stroma
KEAP1	4.93e-10	-0.303992	0.222	0.396	9.67e-06	0	KEAP1	corneal stroma
RNF31	2.88e-07	-0.304327	0.528	0.657	0.00563797	0	RNF31	corneal stroma
PXT1	2.76e-05	-0.304431	0.437	0.534	0.540526	0	PXT1	corneal stroma
2002-09-01	1.23e-05	-0.304869	0.583	0.69	0.241782	0	2002-09-01	corneal stroma
MKNK1	5.21e-05	-0.305144	0.388	0.48	1	0	MKNK1	corneal stroma
DHX34	1.31e-08	-0.305152	0.338	0.504	0.000255885	0	DHX34	corneal stroma
TXNDC11	2.27e-09	-0.305259	0.402	0.585	4.45e-05	0	TXNDC11	corneal stroma
AMDHD2	9.03e-11	-0.305273	0.146	0.311	1.77e-06	0	AMDHD2	corneal stroma
HSF1	1.62e-07	-0.305731	0.397	0.541	0.0031797	0	HSF1	corneal stroma
DDB2	2.77e-07	-0.305941	0.236	0.373	0.00543848	0	DDB2	corneal stroma
EIF1	6.58e-09	-0.305974	0.522	0.663	0.000129034	0	EIF1	corneal stroma
NELFB	3.1e-10	-0.306082	0.254	0.436	6.07e-06	0	NELFB	corneal stroma
RHEBL1	4.88e-11	-0.306285	0.198	0.377	9.56e-07	0	RHEBL1	corneal stroma
RNF215	2.51e-08	-0.306302	0.364	0.534	0.000492623	0	RNF215	corneal stroma
PLEKHH3	5.36e-08	-0.306542	0.478	0.629	0.00105094	0	PLEKHH3	corneal stroma
CLDN15	3.91e-11	-0.306586	0.044	0.187	7.66e-07	0	CLDN15	corneal stroma
SNX30	9.78e-07	-0.306633	0.397	0.522	0.0191853	0	SNX30	corneal stroma
DENND6A	4.63e-10	-0.306659	0.216	0.397	9.08e-06	0	DENND6A	corneal stroma
ABCC4	0.00981345	-0.306728	0.466	0.521	1	0	ABCC4	corneal stroma
ZNRF2	1.14e-06	-0.306908	0.499	0.606	0.0223349	0	ZNRF2	corneal stroma
GPR146	2.46e-06	-0.306999	0.402	0.515	0.0481867	0	GPR146	corneal stroma
ZNF511	1.02e-07	-0.307059	0.309	0.459	0.00199823	0	ZNF511	corneal stroma
LTC4S	5.06e-08	-0.307167	0.175	0.316	0.00099253	0	LTC4S	corneal stroma
IZUMO1	5.26e-10	-0.307498	0.143	0.307	1.03e-05	0	IZUMO1	corneal stroma
IQSEC1	8.28e-05	-0.307647	0.773	0.801	1	0	IQSEC1	corneal stroma
ARL4A	3.99e-08	-0.307689	0.362	0.514	0.000782086	0	ARL4A	corneal stroma
TEX261	2.76e-07	-0.30789	0.201	0.333	0.00541312	0	TEX261	corneal stroma
PRR5	7.39e-05	-0.307909	0.569	0.645	1	0	PRR5	corneal stroma
SLC25A42	8.16e-09	-0.308694	0.595	0.716	0.000159895	0	SLC25A42	corneal stroma
DECR2	6.42e-10	-0.308741	0.274	0.443	1.26e-05	0	DECR2	corneal stroma
ZNF627	1.21e-07	-0.309187	0.469	0.603	0.0023749	0	ZNF627	corneal stroma
RITA1	3.03e-07	-0.309379	0.3	0.445	0.00594496	0	RITA1	corneal stroma
ZNF316	5.3e-08	-0.30945	0.146	0.28	0.00104007	0	ZNF316	corneal stroma
LRP10	5.02e-08	-0.310013	0.259	0.413	0.000984338	0	LRP10	corneal stroma
TRA2A	9.14e-07	-0.310176	0.303	0.429	0.0179176	0	TRA2A	corneal stroma
STUB1	2.88e-10	-0.310185	0.309	0.483	5.64e-06	0	STUB1	corneal stroma
ATP11B	1.29e-05	-0.310193	0.376	0.492	0.25296	0	ATP11B	corneal stroma
PRR36	0.000185029	-0.310262	0.452	0.553	1	0	PRR36	corneal stroma
ECI2	8.01e-10	-0.310272	0.353	0.55	1.57e-05	0	ECI2	corneal stroma
PPP3CB	1.43e-09	-0.310572	0.283	0.45	2.8e-05	0	PPP3CB	corneal stroma
CD164	5.12e-08	-0.310585	0.391	0.54	0.0010048	0	CD164	corneal stroma
RECQL4	1.17e-10	-0.310879	0.216	0.403	2.29e-06	0	RECQL4	corneal stroma
PTPN18	3.65e-08	-0.310929	0.219	0.373	0.000715898	0	PTPN18	corneal stroma
ELF1	9.25e-07	-0.31106	0.563	0.668	0.0181329	0	ELF1	corneal stroma
RP11-226E21.4	1.19e-05	-0.31127	0.499	0.607	0.233706	0	RP11-226E21.4	corneal stroma
GLYR1	2.48e-09	-0.311304	0.347	0.524	4.87e-05	0	GLYR1	corneal stroma
ORAI2	5.42e-09	-0.311418	0.239	0.394	0.000106222	0	ORAI2	corneal stroma
MTMR14	2.83e-10	-0.311538	0.216	0.399	5.55e-06	0	MTMR14	corneal stroma
JUND	4.63e-09	-0.311598	0.636	0.765	9.08e-05	0	JUND	corneal stroma
TCF3	9.54e-06	-0.311963	0.598	0.689	0.187044	0	TCF3	corneal stroma
SMIM12	5.39e-10	-0.312266	0.277	0.449	1.06e-05	0	SMIM12	corneal stroma
NANOS1	2.08e-07	-0.312586	0.265	0.405	0.0040846	0	NANOS1	corneal stroma
WNK1	3.44e-07	-0.312622	0.641	0.731	0.00675186	0	WNK1	corneal stroma
FGFR4	2.54e-10	-0.31291	0.19	0.37	4.99e-06	0	FGFR4	corneal stroma
NRARP	1.41e-08	-0.312941	0.181	0.326	0.000276056	0	NRARP	corneal stroma
SERPINI1	5.82e-05	-0.313442	0.516	0.608	1	0	SERPINI1	corneal stroma
PCGF1	3.79e-10	-0.313575	0.274	0.45	7.43e-06	0	PCGF1	corneal stroma
TALDO1	4.46e-08	-0.313831	0.251	0.392	0.0008748	0	TALDO1	corneal stroma
MRPL38	4.64e-09	-0.314075	0.286	0.447	9.1e-05	0	MRPL38	corneal stroma
CTCF	1e-07	-0.314197	0.566	0.7	0.00195974	0	CTCF	corneal stroma
ATXN1L	3.48e-06	-0.314223	0.458	0.576	0.0682592	0	ATXN1L	corneal stroma
HACD1	4.23e-09	-0.314458	0.125	0.274	8.29e-05	0	HACD1	corneal stroma
MPP1	9.31e-09	-0.314723	0.149	0.293	0.000182605	0	MPP1	corneal stroma
PRIM1	2.26e-11	-0.314859	0.093	0.253	4.43e-07	0	PRIM1	corneal stroma
PCBP1	8e-07	-0.315	0.429	0.563	0.0156865	0	PCBP1	corneal stroma
TMOD1	0.000107646	-0.315272	0.283	0.385	1	0	TMOD1	corneal stroma
TRPC1	7.08e-07	-0.315327	0.265	0.393	0.0138773	0	TRPC1	corneal stroma
ANAPC2	1.11e-09	-0.315501	0.292	0.466	2.17e-05	0	ANAPC2	corneal stroma
PKN1	2.31e-08	-0.3158	0.155	0.293	0.000452136	0	PKN1	corneal stroma
TMCO3	1.67e-07	-0.316221	0.426	0.562	0.00327772	0	TMCO3	corneal stroma
HOMER3	9.98e-09	-0.316467	0.201	0.353	0.000195654	0	HOMER3	corneal stroma
TMEM141	3.03e-10	-0.31649	0.525	0.698	5.94e-06	0	TMEM141	corneal stroma
DNPEP	7.98e-10	-0.316764	0.606	0.747	1.56e-05	0	DNPEP	corneal stroma
YWHAZ	4.91e-05	-0.316789	0.653	0.724	0.961782	0	YWHAZ	corneal stroma
CTC-398G3.6	3.89e-07	-0.316834	0.519	0.636	0.00763245	0	CTC-398G3.6	corneal stroma
BCCIP	4.18e-11	-0.317165	0.192	0.373	8.2e-07	0	BCCIP	corneal stroma
FKBP8	4.41e-09	-0.317451	0.192	0.353	8.65e-05	0	FKBP8	corneal stroma
BNIP3L	2.95e-05	-0.317525	0.656	0.715	0.578398	0	BNIP3L	corneal stroma
FAM212B	3.04e-05	-0.317847	0.606	0.678	0.596121	0	FAM212B	corneal stroma
MYL5	1.32e-06	-0.31793	0.338	0.471	0.0259236	0	MYL5	corneal stroma
CELF3	1.08e-11	-0.31807	0.114	0.285	2.11e-07	0	CELF3	corneal stroma
MSL2	2.8e-07	-0.318298	0.603	0.705	0.0054839	0	MSL2	corneal stroma
RNF32	7.02e-11	-0.318587	0.172	0.349	1.38e-06	0	RNF32	corneal stroma
ZNF692	2.94e-08	-0.318691	0.318	0.477	0.00057592	0	ZNF692	corneal stroma
AK7	2.4e-08	-0.318841	0.329	0.488	0.000469745	0	AK7	corneal stroma
BORCS6	1.14e-06	-0.319132	0.332	0.468	0.022288	0	BORCS6	corneal stroma
STK11	7.85e-06	-0.31938	0.586	0.66	0.153879	0	STK11	corneal stroma
STRADB	1.06e-06	-0.319613	0.478	0.597	0.0208412	0	STRADB	corneal stroma
DALRD3	1.04e-06	-0.319846	0.531	0.629	0.0204542	0	DALRD3	corneal stroma
SAMD1	1.57e-05	-0.319856	0.385	0.485	0.308499	0	SAMD1	corneal stroma
PPP1R16A	5.95e-09	-0.319965	0.274	0.437	0.000116574	0	PPP1R16A	corneal stroma
OPTN	1.79e-08	-0.319987	0.201	0.348	0.000351389	0	OPTN	corneal stroma
UROS	8.4e-10	-0.320051	0.216	0.383	1.65e-05	0	UROS	corneal stroma
GNL1	5.51e-07	-0.320227	0.531	0.635	0.0108067	0	GNL1	corneal stroma
ADCK5	4.99e-09	-0.320455	0.271	0.431	9.78e-05	0	ADCK5	corneal stroma
CTD-2410N18.5	8.1e-07	-0.320952	0.673	0.772	0.0158767	0	CTD-2410N18.5	corneal stroma
PACS2	2.52e-07	-0.321086	0.653	0.736	0.00494899	0	PACS2	corneal stroma
CLN8	7.5e-07	-0.321405	0.51	0.614	0.0146979	0	CLN8	corneal stroma
HPD	3.64e-12	-0.321524	0.195	0.39	7.14e-08	0	HPD	corneal stroma
STON2	0.00410755	-0.321608	0.49	0.529	1	0	STON2	corneal stroma
AP3D1	1.36e-08	-0.321706	0.621	0.751	0.000267288	0	AP3D1	corneal stroma
ADAMTSL5	4.79e-10	-0.321778	0.245	0.418	9.4e-06	0	ADAMTSL5	corneal stroma
GALK1	1.03e-10	-0.321799	0.227	0.402	2.01e-06	0	GALK1	corneal stroma
UCKL1	1.76e-06	-0.321875	0.385	0.515	0.0344653	0	UCKL1	corneal stroma
DVL1	3.28e-07	-0.321971	0.341	0.476	0.00643401	0	DVL1	corneal stroma
CRB2	1.26e-08	-0.322033	0.192	0.348	0.000247374	0	CRB2	corneal stroma
DPCD	2.7e-05	-0.32205	0.306	0.407	0.529111	0	DPCD	corneal stroma
SLC22A31	5.43e-13	-0.322066	0.073	0.244	1.07e-08	0	SLC22A31	corneal stroma
PLEKHF2	6.12e-08	-0.322304	0.309	0.461	0.00119931	0	PLEKHF2	corneal stroma
ELMSAN1	0.000674369	-0.322324	0.799	0.814	1	0	ELMSAN1	corneal stroma
PPP6R2	8.18e-08	-0.322819	0.364	0.502	0.00160451	0	PPP6R2	corneal stroma
ULK3	4.28e-11	-0.322945	0.207	0.392	8.39e-07	0	ULK3	corneal stroma
NOXA1	1.69e-09	-0.323119	0.187	0.343	3.31e-05	0	NOXA1	corneal stroma
ACP1	2.76e-07	-0.32312	0.201	0.338	0.00541451	0	ACP1	corneal stroma
AP5S1	5.17e-09	-0.323446	0.338	0.495	0.000101275	0	AP5S1	corneal stroma
TDRD7	3.59e-11	-0.323904	0.166	0.347	7.03e-07	0	TDRD7	corneal stroma
ZNF367	1.76e-09	-0.324145	0.458	0.627	3.44e-05	0	ZNF367	corneal stroma
ADAM15	5.15e-09	-0.324311	0.283	0.448	0.000100995	0	ADAM15	corneal stroma
MAP1LC3B	1.86e-06	-0.324674	0.72	0.784	0.03648	0	MAP1LC3B	corneal stroma
SKIL	1.45e-07	-0.324698	0.589	0.705	0.00284653	0	SKIL	corneal stroma
ZBTB37	1.03e-07	-0.324736	0.501	0.63	0.00202134	0	ZBTB37	corneal stroma
ASB6	9.55e-11	-0.325359	0.274	0.462	1.87e-06	0	ASB6	corneal stroma
TRIM58	1.02e-11	-0.325592	0.064	0.226	2e-07	0	TRIM58	corneal stroma
DYNLL1	4.6e-07	-0.325647	0.571	0.679	0.0090178	0	DYNLL1	corneal stroma
CPAMD8	0.000201194	-0.325711	0.382	0.462	1	0	CPAMD8	corneal stroma
SNAPC2	1.43e-08	-0.325768	0.469	0.634	0.000280115	0	SNAPC2	corneal stroma
USP15	8.71e-07	-0.32582	0.452	0.568	0.0170809	0	USP15	corneal stroma
HSD17B6	1.9e-11	-0.325879	0.131	0.303	3.72e-07	0	HSD17B6	corneal stroma
SNAI3	7.55e-10	-0.326042	0.152	0.303	1.48e-05	0	SNAI3	corneal stroma
PCGF3	6e-08	-0.326062	0.397	0.553	0.00117738	0	PCGF3	corneal stroma
TSPAN13	2.33e-10	-0.326141	0.134	0.295	4.57e-06	0	TSPAN13	corneal stroma
TRIM36	2.77e-11	-0.32661	0.21	0.393	5.43e-07	0	TRIM36	corneal stroma
BEND6	1.24e-05	-0.327212	0.289	0.406	0.243436	0	BEND6	corneal stroma
NUP43	3.69e-09	-0.327557	0.3	0.474	7.23e-05	0	NUP43	corneal stroma
EZH1	2e-09	-0.327634	0.259	0.421	3.92e-05	0	EZH1	corneal stroma
ODC1	1.21e-07	-0.327868	0.402	0.551	0.00237236	0	ODC1	corneal stroma
GPI	2.89e-09	-0.327908	0.327	0.494	5.67e-05	0	GPI	corneal stroma
ABCF3	9.16e-12	-0.328044	0.367	0.571	1.8e-07	0	ABCF3	corneal stroma
PCID2	4.44e-05	-0.328143	0.437	0.523	0.869696	0	PCID2	corneal stroma
NFAT5	3.22e-08	-0.328672	0.449	0.599	0.000632166	0	NFAT5	corneal stroma
CXXC5	6.12e-06	-0.328682	0.577	0.655	0.120072	0	CXXC5	corneal stroma
FHDC1	0.000186174	-0.328919	0.303	0.398	1	0	FHDC1	corneal stroma
BCAP31	1.45e-09	-0.328942	0.341	0.509	2.85e-05	0	BCAP31	corneal stroma
MGA	3.59e-05	-0.328947	0.484	0.585	0.70479	0	MGA	corneal stroma
COPZ1	9.96e-08	-0.329101	0.49	0.626	0.00195359	0	COPZ1	corneal stroma
RP11-761B3.1	1.97e-07	-0.329169	0.56	0.681	0.00386298	0	RP11-761B3.1	corneal stroma
DAZAP1	2.16e-09	-0.329326	0.481	0.621	4.24e-05	0	DAZAP1	corneal stroma
SLC35E4	4.02e-08	-0.329355	0.423	0.57	0.00078917	0	SLC35E4	corneal stroma
C19orf38	4.69e-08	-0.329358	0.464	0.603	0.000920187	0	C19orf38	corneal stroma
TIGD5	6.21e-09	-0.329885	0.414	0.576	0.000121854	0	TIGD5	corneal stroma
QKI	1.34e-05	-0.32996	0.606	0.717	0.262277	0	QKI	corneal stroma
RP11-87C12.2	2.92e-09	-0.330026	0.3	0.462	5.72e-05	0	RP11-87C12.2	corneal stroma
ABCB6	9.96e-09	-0.330356	0.397	0.56	0.0001952	0	ABCB6	corneal stroma
SSNA1	1.95e-10	-0.330468	0.262	0.441	3.82e-06	0	SSNA1	corneal stroma
PPP2R5A	1.72e-07	-0.330565	0.504	0.664	0.00337776	0	PPP2R5A	corneal stroma
SH3GLB2	1.13e-10	-0.330581	0.397	0.574	2.21e-06	0	SH3GLB2	corneal stroma
MAP2K7	2.12e-10	-0.330678	0.373	0.558	4.15e-06	0	MAP2K7	corneal stroma
CKAP4	2.55e-05	-0.331233	0.551	0.625	0.49923	0	CKAP4	corneal stroma
MATR3	9.52e-08	-0.331513	0.452	0.59	0.00186669	0	MATR3	corneal stroma
RTBDN	6.09e-12	-0.331672	0.108	0.288	1.19e-07	0	RTBDN	corneal stroma
ESCO1	3.3e-08	-0.331715	0.292	0.436	0.00064657	0	ESCO1	corneal stroma
MTCH1	3.99e-08	-0.332034	0.341	0.5	0.000782492	0	MTCH1	corneal stroma
TEPP	8.81e-11	-0.332513	0.134	0.296	1.73e-06	0	TEPP	corneal stroma
CSPP1	5.48e-07	-0.332823	0.402	0.54	0.0107535	0	CSPP1	corneal stroma
FLCN	3.73e-07	-0.33313	0.332	0.466	0.00731179	0	FLCN	corneal stroma
RASSF7	4.94e-12	-0.333167	0.198	0.388	9.69e-08	0	RASSF7	corneal stroma
TNK2	4.68e-05	-0.333208	0.531	0.625	0.917463	0	TNK2	corneal stroma
RP11-717K11.2	8.13e-08	-0.333244	0.335	0.478	0.00159433	0	RP11-717K11.2	corneal stroma
RAB21	2.37e-10	-0.333453	0.274	0.452	4.65e-06	0	RAB21	corneal stroma
MAGIX	1.3e-08	-0.333688	0.216	0.36	0.000255061	0	MAGIX	corneal stroma
WWC3	1.21e-05	-0.334282	0.443	0.551	0.236492	0	WWC3	corneal stroma
CBX3	1.23e-07	-0.334447	0.624	0.741	0.002413	0	CBX3	corneal stroma
CYC1	2.92e-10	-0.334573	0.268	0.436	5.72e-06	0	CYC1	corneal stroma
HDLBP	3.69e-07	-0.334594	0.659	0.769	0.00724104	0	HDLBP	corneal stroma
TP53INP1	2.91e-08	-0.334607	0.265	0.413	0.000569893	0	TP53INP1	corneal stroma
DCUN1D2	2.19e-08	-0.334721	0.367	0.514	0.000429546	0	DCUN1D2	corneal stroma
TYMS	2.97e-07	-0.334918	0.187	0.314	0.00581488	0	TYMS	corneal stroma
RGS9BP	1.57e-06	-0.335088	0.417	0.528	0.0307243	0	RGS9BP	corneal stroma
E2F1	1.58e-10	-0.335172	0.338	0.525	3.1e-06	0	E2F1	corneal stroma
TAF6L	1.16e-07	-0.335397	0.431	0.591	0.00227533	0	TAF6L	corneal stroma
TP53INP2	6.16e-06	-0.335686	0.513	0.614	0.120703	0	TP53INP2	corneal stroma
ZNF511-PRAP1	2.47e-05	-0.335845	0.528	0.627	0.484499	0	ZNF511-PRAP1	corneal stroma
ASAH1	1.56e-06	-0.335875	0.297	0.427	0.030589	0	ASAH1	corneal stroma
ABHD8	8.09e-09	-0.335891	0.636	0.752	0.000158574	0	ABHD8	corneal stroma
TMEM63B	2.33e-07	-0.335965	0.455	0.587	0.00456225	0	TMEM63B	corneal stroma
C1orf35	3.7e-08	-0.336314	0.277	0.424	0.000725208	0	C1orf35	corneal stroma
CDV3	3.45e-08	-0.336387	0.574	0.699	0.000676005	0	CDV3	corneal stroma
STK32C	2.16e-07	-0.336898	0.583	0.68	0.0042368	0	STK32C	corneal stroma
NUDT18	1.1e-09	-0.336955	0.265	0.428	2.16e-05	0	NUDT18	corneal stroma
ITGA7	7.01e-09	-0.337265	0.318	0.476	0.000137446	0	ITGA7	corneal stroma
KPTN	3.3e-11	-0.337346	0.169	0.343	6.48e-07	0	KPTN	corneal stroma
ANKRD52	4.42e-09	-0.337355	0.254	0.416	8.66e-05	0	ANKRD52	corneal stroma
MAPRE3	3.12e-07	-0.337893	0.315	0.445	0.00612636	0	MAPRE3	corneal stroma
FBRSL1	1.76e-07	-0.338149	0.609	0.719	0.00345804	0	FBRSL1	corneal stroma
CALM2	1.75e-08	-0.338423	0.464	0.608	0.000342166	0	CALM2	corneal stroma
MRPL41	1.39e-08	-0.338602	0.245	0.398	0.000273297	0	MRPL41	corneal stroma
RAB3IP	5.96e-08	-0.338653	0.28	0.423	0.00116948	0	RAB3IP	corneal stroma
PTEN	2.53e-07	-0.339217	0.499	0.616	0.004959	0	PTEN	corneal stroma
HNRNPF	4.31e-06	-0.339249	0.659	0.728	0.0844775	0	HNRNPF	corneal stroma
PNPLA2	1.07e-10	-0.339352	0.248	0.443	2.1e-06	0	PNPLA2	corneal stroma
CTDSP1	7.16e-08	-0.339367	0.499	0.626	0.0014038	0	CTDSP1	corneal stroma
RP11-795F19.5	2.41e-09	-0.339388	0.603	0.737	4.72e-05	0	RP11-795F19.5	corneal stroma
CBX6	1.17e-09	-0.339488	0.373	0.535	2.29e-05	0	CBX6	corneal stroma
PARD6B	5.76e-07	-0.339659	0.405	0.528	0.0112844	0	PARD6B	corneal stroma
SLC12A6	3.32e-10	-0.339708	0.315	0.487	6.52e-06	0	SLC12A6	corneal stroma
CPEB2	0.000275917	-0.339727	0.478	0.55	1	0	CPEB2	corneal stroma
FBXL3	2.17e-07	-0.339804	0.347	0.485	0.00425927	0	FBXL3	corneal stroma
PTGES3	6.21e-07	-0.339813	0.525	0.651	0.012182	0	PTGES3	corneal stroma
KANSL1	1.62e-07	-0.339865	0.723	0.79	0.003179	0	KANSL1	corneal stroma
CLK3	3.66e-07	-0.33993	0.621	0.704	0.00718349	0	CLK3	corneal stroma
MICAL3	0.000462872	-0.340482	0.615	0.671	1	0	MICAL3	corneal stroma
WDR81	1.54e-06	-0.340591	0.735	0.811	0.0302218	0	WDR81	corneal stroma
RUFY2	7.45e-08	-0.34065	0.318	0.453	0.00146153	0	RUFY2	corneal stroma
COL18A1	3.37e-06	-0.340859	0.557	0.656	0.0661032	0	COL18A1	corneal stroma
METAP1	3.64e-09	-0.341444	0.466	0.617	7.14e-05	0	METAP1	corneal stroma
TBC1D24	2.88e-07	-0.341549	0.388	0.531	0.0056423	0	TBC1D24	corneal stroma
RP11-552F3.12	8.41e-10	-0.342014	0.329	0.491	1.65e-05	0	RP11-552F3.12	corneal stroma
SCYL1	9.71e-10	-0.342114	0.233	0.396	1.9e-05	0	SCYL1	corneal stroma
KATNA1	2.78e-10	-0.342149	0.172	0.334	5.45e-06	0	KATNA1	corneal stroma
EWSR1	8.64e-11	-0.34285	0.341	0.537	1.69e-06	0	EWSR1	corneal stroma
ZNF746	3.8e-10	-0.342864	0.192	0.36	7.45e-06	0	ZNF746	corneal stroma
FOXH1	1.08e-13	-0.34289	0.146	0.345	2.13e-09	0	FOXH1	corneal stroma
HIVEP1	3.44e-08	-0.34318	0.659	0.753	0.000675338	0	HIVEP1	corneal stroma
STAT5B	7.12e-07	-0.343422	0.306	0.432	0.0139558	0	STAT5B	corneal stroma
TXN	7.85e-08	-0.343834	0.259	0.403	0.00153867	0	TXN	corneal stroma
AVPI1	3.25e-13	-0.34417	0.297	0.515	6.37e-09	0	AVPI1	corneal stroma
USP20	2.01e-09	-0.344191	0.402	0.57	3.95e-05	0	USP20	corneal stroma
KBTBD2	1.07e-06	-0.344408	0.487	0.598	0.0209018	0	KBTBD2	corneal stroma
FAM214B	4.56e-09	-0.344855	0.671	0.786	8.95e-05	0	FAM214B	corneal stroma
TBC1D14	7.41e-07	-0.344988	0.679	0.754	0.0145356	0	TBC1D14	corneal stroma
KLLN	1.58e-07	-0.345243	0.423	0.549	0.00308988	0	KLLN	corneal stroma
TUBB4B	2.04e-07	-0.345348	0.58	0.699	0.004001	0	TUBB4B	corneal stroma
ACSS2	8.41e-10	-0.345433	0.426	0.58	1.65e-05	0	ACSS2	corneal stroma
ADGRE5	1.4e-10	-0.345459	0.309	0.492	2.74e-06	0	ADGRE5	corneal stroma
BRF1	6.7e-07	-0.345475	0.662	0.76	0.0131329	0	BRF1	corneal stroma
ATG14	4.84e-07	-0.345571	0.233	0.361	0.00948679	0	ATG14	corneal stroma
LMBR1	1.63e-08	-0.345698	0.455	0.605	0.000319506	0	LMBR1	corneal stroma
APC2	2.09e-06	-0.345794	0.388	0.5	0.0409506	0	APC2	corneal stroma
RBFA	3.19e-09	-0.345889	0.589	0.721	6.26e-05	0	RBFA	corneal stroma
WDR45B	1.82e-10	-0.346023	0.297	0.477	3.58e-06	0	WDR45B	corneal stroma
ACVR2B	5.64e-08	-0.346717	0.3	0.439	0.00110673	0	ACVR2B	corneal stroma
PI4KA	3.4e-09	-0.346932	0.481	0.622	6.66e-05	0	PI4KA	corneal stroma
SIAH1	1.95e-07	-0.34712	0.452	0.58	0.00383054	0	SIAH1	corneal stroma
TMED1	4.54e-10	-0.34739	0.385	0.552	8.9e-06	0	TMED1	corneal stroma
DEDD2	4.66e-08	-0.34797	0.574	0.682	0.000914243	0	DEDD2	corneal stroma
CCDC124	1.08e-10	-0.348022	0.219	0.384	2.13e-06	0	CCDC124	corneal stroma
ING5	1.41e-08	-0.348032	0.673	0.772	0.0002755	0	ING5	corneal stroma
WDR20	3.03e-09	-0.348035	0.44	0.601	5.94e-05	0	WDR20	corneal stroma
OBSL1	1.47e-09	-0.348054	0.397	0.575	2.87e-05	0	OBSL1	corneal stroma
FAM228B	9.94e-08	-0.348223	0.682	0.76	0.0019491	0	FAM228B	corneal stroma
LRRC24	1.75e-07	-0.348237	0.411	0.544	0.00342465	0	LRRC24	corneal stroma
IRF2BP2	6.44e-07	-0.348269	0.499	0.617	0.0126199	0	IRF2BP2	corneal stroma
TPPP2	3.95e-07	-0.348531	0.163	0.289	0.00774046	0	TPPP2	corneal stroma
GLB1L2	7.38e-12	-0.348786	0.172	0.361	1.45e-07	0	GLB1L2	corneal stroma
AL021546.6	4.91e-11	-0.349068	0.312	0.498	9.62e-07	0	AL021546.6	corneal stroma
ZBED4	2.5e-12	-0.349903	0.338	0.537	4.91e-08	0	ZBED4	corneal stroma
PDIK1L	6.32e-10	-0.350295	0.324	0.492	1.24e-05	0	PDIK1L	corneal stroma
UBTF	7.11e-08	-0.350337	0.636	0.737	0.0013938	0	UBTF	corneal stroma
TMEM223	3.51e-07	-0.350479	0.472	0.613	0.00687441	0	TMEM223	corneal stroma
SLC25A51	1.49e-09	-0.350577	0.233	0.394	2.92e-05	0	SLC25A51	corneal stroma
FADS3	5.41e-09	-0.350627	0.224	0.38	0.000105988	0	FADS3	corneal stroma
GLUL	1.56e-08	-0.350904	0.271	0.417	0.000306061	0	GLUL	corneal stroma
H3F3A	3.87e-09	-0.35105	0.522	0.676	7.59e-05	0	H3F3A	corneal stroma
RASAL3	1.19e-08	-0.351315	0.163	0.308	0.000233136	0	RASAL3	corneal stroma
BRD2	9.71e-07	-0.351616	0.764	0.826	0.0190345	0	BRD2	corneal stroma
GATA5	1.6e-11	-0.351816	0.052	0.202	3.14e-07	0	GATA5	corneal stroma
QSOX2	4.3e-10	-0.351821	0.259	0.439	8.43e-06	0	QSOX2	corneal stroma
SPSB2	4.12e-09	-0.351907	0.504	0.674	8.08e-05	0	SPSB2	corneal stroma
MKLN1	0.000768112	-0.352265	0.539	0.619	1	0	MKLN1	corneal stroma
INTS6	1.94e-08	-0.352396	0.644	0.755	0.000380265	0	INTS6	corneal stroma
BLOC1S1	5.73e-11	-0.352676	0.184	0.365	1.12e-06	0	BLOC1S1	corneal stroma
ACBD4	2.59e-09	-0.352903	0.443	0.595	5.07e-05	0	ACBD4	corneal stroma
BAX	5.2e-11	-0.352971	0.195	0.374	1.02e-06	0	BAX	corneal stroma
PLIN2	1.75e-07	-0.353848	0.222	0.359	0.00342152	0	PLIN2	corneal stroma
ERBB3	2.11e-10	-0.353853	0.184	0.359	4.14e-06	0	ERBB3	corneal stroma
HNRNPA2B1	2.93e-09	-0.354326	0.615	0.753	5.74e-05	0	HNRNPA2B1	corneal stroma
KCTD11	1.97e-09	-0.354443	0.338	0.498	3.87e-05	0	KCTD11	corneal stroma
MROH6	2.31e-10	-0.355642	0.417	0.594	4.52e-06	0	MROH6	corneal stroma
PLK3	5.32e-09	-0.355955	0.464	0.623	0.000104242	0	PLK3	corneal stroma
LAMA5	4.96e-10	-0.356014	0.274	0.443	9.73e-06	0	LAMA5	corneal stroma
AHDC1	3.53e-06	-0.356218	0.714	0.789	0.0692189	0	AHDC1	corneal stroma
TRIM33	1.08e-05	-0.356258	0.402	0.513	0.212174	0	TRIM33	corneal stroma
CHD4	3.55e-08	-0.356635	0.327	0.486	0.000696996	0	CHD4	corneal stroma
ZNF250	5.11e-09	-0.356656	0.402	0.565	0.000100171	0	ZNF250	corneal stroma
RFFL	8e-10	-0.356689	0.292	0.46	1.57e-05	0	RFFL	corneal stroma
ZNF706	2.55e-08	-0.357075	0.522	0.651	0.000500569	0	ZNF706	corneal stroma
GDPGP1	2.51e-11	-0.357195	0.262	0.455	4.91e-07	0	GDPGP1	corneal stroma
CACNA2D4	1.01e-08	-0.357411	0.367	0.528	0.000197658	0	CACNA2D4	corneal stroma
DYNLL2	3.16e-10	-0.357824	0.315	0.484	6.19e-06	0	DYNLL2	corneal stroma
SLC2A4	1.19e-11	-0.358041	0.233	0.424	2.33e-07	0	SLC2A4	corneal stroma
GADD45G	1.09e-06	-0.358188	0.268	0.39	0.0213188	0	GADD45G	corneal stroma
CIB1	3.09e-11	-0.35862	0.262	0.451	6.06e-07	0	CIB1	corneal stroma
RHBDD3	1.66e-11	-0.358627	0.3	0.496	3.26e-07	0	RHBDD3	corneal stroma
TMEM170A	1.34e-10	-0.358636	0.394	0.569	2.63e-06	0	TMEM170A	corneal stroma
AC010646.3	1.23e-09	-0.358637	0.28	0.438	2.41e-05	0	AC010646.3	corneal stroma
ZNF276	8.67e-10	-0.3588	0.292	0.457	1.7e-05	0	ZNF276	corneal stroma
ATF1	1.08e-10	-0.359192	0.262	0.448	2.12e-06	0	ATF1	corneal stroma
ULK1	2.92e-10	-0.35939	0.449	0.601	5.73e-06	0	ULK1	corneal stroma
SREBF2	4.26e-09	-0.359688	0.534	0.679	8.35e-05	0	SREBF2	corneal stroma
SYDE2	1.44e-06	-0.359739	0.245	0.361	0.0283062	0	SYDE2	corneal stroma
NCOA4	3.43e-07	-0.360031	0.356	0.475	0.00672201	0	NCOA4	corneal stroma
SLC3A2	1.7e-07	-0.360248	0.571	0.691	0.00332593	0	SLC3A2	corneal stroma
HTRA2	8.76e-11	-0.360443	0.312	0.493	1.72e-06	0	HTRA2	corneal stroma
AUP1	6.56e-11	-0.36045	0.309	0.492	1.29e-06	0	AUP1	corneal stroma
ARHGDIA	4.59e-10	-0.36059	0.239	0.409	8.99e-06	0	ARHGDIA	corneal stroma
STK40	3.05e-07	-0.360786	0.641	0.742	0.00598319	0	STK40	corneal stroma
SLC39A4	1.67e-12	-0.360907	0.149	0.339	3.28e-08	0	SLC39A4	corneal stroma
YBX2	2.52e-12	-0.361805	0.12	0.297	4.95e-08	0	YBX2	corneal stroma
CELSR3	2.96e-08	-0.362047	0.458	0.608	0.000581129	0	CELSR3	corneal stroma
CTNNAL1	2.71e-07	-0.362537	0.42	0.551	0.00530898	0	CTNNAL1	corneal stroma
HBM	3.64e-11	-0.362592	0.096	0.259	7.15e-07	0	HBM	corneal stroma
MAT2A	4.7e-08	-0.3626	0.455	0.593	0.000921491	0	MAT2A	corneal stroma
KDM3B	4.43e-11	-0.362697	0.405	0.588	8.68e-07	0	KDM3B	corneal stroma
MAST3	1.52e-09	-0.362807	0.324	0.496	2.98e-05	0	MAST3	corneal stroma
PRR3	3.26e-08	-0.362871	0.469	0.594	0.000638906	0	PRR3	corneal stroma
RBBP7	1.41e-10	-0.362893	0.324	0.49	2.77e-06	0	RBBP7	corneal stroma
EEF1D	8.2e-10	-0.362925	0.446	0.614	1.61e-05	0	EEF1D	corneal stroma
HDGF	6.05e-08	-0.362935	0.735	0.825	0.00118633	0	HDGF	corneal stroma
MRPS6	7.63e-07	-0.363253	0.429	0.552	0.014959	0	MRPS6	corneal stroma
TBC1D2	7.31e-12	-0.363579	0.297	0.492	1.43e-07	0	TBC1D2	corneal stroma
BCL7B	1.23e-10	-0.364152	0.303	0.481	2.42e-06	0	BCL7B	corneal stroma
ANKRD12	1.98e-08	-0.364332	0.569	0.697	0.000388617	0	ANKRD12	corneal stroma
CDKN1B	2.12e-10	-0.364442	0.242	0.413	4.16e-06	0	CDKN1B	corneal stroma
FKBP2	2.07e-11	-0.364456	0.557	0.701	4.06e-07	0	FKBP2	corneal stroma
MICAL2	0.00948614	-0.364663	0.58	0.608	1	0	MICAL2	corneal stroma
FBXO7	2.28e-10	-0.36517	0.213	0.381	4.46e-06	0	FBXO7	corneal stroma
SOS2	4.54e-11	-0.365211	0.335	0.509	8.9e-07	0	SOS2	corneal stroma
UNC13A	5.7e-08	-0.365298	0.254	0.398	0.00111727	0	UNC13A	corneal stroma
BCL2L1	3.24e-07	-0.365561	0.496	0.629	0.0063612	0	BCL2L1	corneal stroma
SYNGR2	1.64e-11	-0.365986	0.099	0.261	3.21e-07	0	SYNGR2	corneal stroma
POLD1	6.09e-11	-0.366035	0.344	0.529	1.19e-06	0	POLD1	corneal stroma
SSC4D	1.22e-10	-0.366482	0.248	0.422	2.4e-06	0	SSC4D	corneal stroma
NAGLU	1.64e-12	-0.366947	0.178	0.37	3.22e-08	0	NAGLU	corneal stroma
CASP9	4.29e-11	-0.367334	0.732	0.829	8.4e-07	0	CASP9	corneal stroma
HCFC2	1.63e-09	-0.367545	0.23	0.398	3.2e-05	0	HCFC2	corneal stroma
EPOR	6.89e-08	-0.367716	0.399	0.528	0.00135097	0	EPOR	corneal stroma
TEX264	2.81e-10	-0.367975	0.262	0.43	5.51e-06	0	TEX264	corneal stroma
ZNF821	1.09e-07	-0.367994	0.531	0.655	0.00214143	0	ZNF821	corneal stroma
ARF1	1.45e-09	-0.36834	0.376	0.539	2.83e-05	0	ARF1	corneal stroma
HSP90AB1	1.19e-08	-0.368511	0.434	0.593	0.000233311	0	HSP90AB1	corneal stroma
TMEM57	8.66e-08	-0.368544	0.487	0.596	0.00169702	0	TMEM57	corneal stroma
GADD45A	2.61e-08	-0.368569	0.542	0.659	0.000512537	0	GADD45A	corneal stroma
SFPQ	3.72e-08	-0.368581	0.449	0.597	0.000729588	0	SFPQ	corneal stroma
JMJD6	1.74e-09	-0.369107	0.388	0.539	3.41e-05	0	JMJD6	corneal stroma
PIP5KL1	3.34e-09	-0.369481	0.283	0.441	6.54e-05	0	PIP5KL1	corneal stroma
HEXDC	1.87e-12	-0.369502	0.257	0.46	3.66e-08	0	HEXDC	corneal stroma
SUMO3	2.22e-13	-0.370156	0.265	0.479	4.36e-09	0	SUMO3	corneal stroma
ANKRD13D	3.54e-12	-0.371041	0.315	0.521	6.93e-08	0	ANKRD13D	corneal stroma
PUSL1	2.13e-09	-0.37139	0.405	0.556	4.17e-05	0	PUSL1	corneal stroma
SEMA7A	2.91e-10	-0.371403	0.222	0.391	5.7e-06	0	SEMA7A	corneal stroma
ATP6V0C	4.88e-08	-0.371515	0.394	0.545	0.000955875	0	ATP6V0C	corneal stroma
KCNIP2	1.32e-06	-0.371813	0.501	0.61	0.0259427	0	KCNIP2	corneal stroma
CNNM3	9.1e-09	-0.372047	0.455	0.608	0.000178489	0	CNNM3	corneal stroma
ABTB1	7.15e-13	-0.372078	0.137	0.325	1.4e-08	0	ABTB1	corneal stroma
CIRBP	9.73e-11	-0.372177	0.665	0.805	1.91e-06	0	CIRBP	corneal stroma
CDKN1C	1.82e-08	-0.372313	0.446	0.572	0.000357805	0	CDKN1C	corneal stroma
STX4	6.04e-12	-0.372351	0.303	0.505	1.18e-07	0	STX4	corneal stroma
DUSP1	2.51e-09	-0.372532	0.452	0.602	4.92e-05	0	DUSP1	corneal stroma
RP11-20I23.1	5.64e-08	-0.372856	0.493	0.629	0.00110672	0	RP11-20I23.1	corneal stroma
PTBP3	1.98e-11	-0.373044	0.452	0.629	3.87e-07	0	PTBP3	corneal stroma
SF3A2	8.87e-12	-0.373266	0.373	0.552	1.74e-07	0	SF3A2	corneal stroma
H2AFX	1.32e-09	-0.373289	0.461	0.611	2.58e-05	0	H2AFX	corneal stroma
RHOF	1.79e-05	-0.373907	0.72	0.766	0.350208	0	RHOF	corneal stroma
GET4	4.29e-08	-0.374251	0.385	0.529	0.000841858	0	GET4	corneal stroma
TCF25	7.86e-12	-0.374779	0.472	0.647	1.54e-07	0	TCF25	corneal stroma
TECR	4.85e-10	-0.374879	0.729	0.825	9.5e-06	0	TECR	corneal stroma
HDAC1	8.94e-13	-0.375179	0.219	0.42	1.75e-08	0	HDAC1	corneal stroma
ZBTB44	2.17e-09	-0.375239	0.327	0.487	4.25e-05	0	ZBTB44	corneal stroma
WBSCR22	5.26e-11	-0.375575	0.37	0.55	1.03e-06	0	WBSCR22	corneal stroma
WDSUB1	2.58e-11	-0.375915	0.277	0.466	5.06e-07	0	WDSUB1	corneal stroma
CAMTA2	4.26e-09	-0.375925	0.329	0.477	8.35e-05	0	CAMTA2	corneal stroma
PPP1R14C	0.000354535	-0.376054	0.297	0.38	1	0	PPP1R14C	corneal stroma
PRICKLE3	1.39e-14	-0.376245	0.087	0.277	2.72e-10	0	PRICKLE3	corneal stroma
CAMSAP1	1.33e-11	-0.376526	0.446	0.639	2.62e-07	0	CAMSAP1	corneal stroma
TUBGCP2	4.65e-10	-0.37658	0.344	0.524	9.11e-06	0	TUBGCP2	corneal stroma
SPAG9	8.03e-10	-0.377252	0.592	0.721	1.57e-05	0	SPAG9	corneal stroma
NAPA	3e-11	-0.377812	0.516	0.686	5.89e-07	0	NAPA	corneal stroma
GCLM	4.77e-08	-0.378048	0.283	0.416	0.000936003	0	GCLM	corneal stroma
LRFN4	3.13e-12	-0.378295	0.216	0.409	6.14e-08	0	LRFN4	corneal stroma
C1orf145	8.09e-12	-0.378319	0.219	0.406	1.59e-07	0	C1orf145	corneal stroma
C5orf45	0.000450461	-0.37875	0.399	0.487	1	0	C5orf45	corneal stroma
YPEL4	3.47e-11	-0.378999	0.195	0.378	6.81e-07	0	YPEL4	corneal stroma
METTL23	1.36e-09	-0.379043	0.376	0.537	2.67e-05	0	METTL23	corneal stroma
KDM6A	4.78e-09	-0.379129	0.385	0.563	9.38e-05	0	KDM6A	corneal stroma
SOD2	7.86e-10	-0.38027	0.711	0.829	1.54e-05	0	SOD2	corneal stroma
NINJ2	0.000117707	-0.380317	0.429	0.515	1	0	NINJ2	corneal stroma
EMC3	8.68e-09	-0.380395	0.405	0.557	0.000170092	0	EMC3	corneal stroma
SEC14L1	7.55e-09	-0.38059	0.659	0.763	0.000148044	0	SEC14L1	corneal stroma
C11orf95	2.99e-06	-0.381103	0.359	0.481	0.0585645	0	C11orf95	corneal stroma
VARS	1.53e-12	-0.381233	0.219	0.416	3e-08	0	VARS	corneal stroma
NHLRC4	1.49e-13	-0.38125	0.058	0.23	2.91e-09	0	NHLRC4	corneal stroma
HLA-DMA	3.12e-09	-0.381269	0.525	0.666	6.12e-05	0	HLA-DMA	corneal stroma
PLEKHJ1	6.13e-12	-0.3822	0.367	0.543	1.2e-07	0	PLEKHJ1	corneal stroma
PXMP4	5.46e-09	-0.382735	0.227	0.383	0.000106959	0	PXMP4	corneal stroma
HERC1	8.32e-08	-0.383046	0.431	0.555	0.00163073	0	HERC1	corneal stroma
LMTK3	7.76e-07	-0.383248	0.431	0.542	0.0152099	0	LMTK3	corneal stroma
ARRDC1	7.83e-10	-0.383847	0.434	0.584	1.54e-05	0	ARRDC1	corneal stroma
JUNB	5.82e-11	-0.383929	0.472	0.636	1.14e-06	0	JUNB	corneal stroma
NUTF2	1.46e-10	-0.383996	0.426	0.601	2.86e-06	0	NUTF2	corneal stroma
DNAJB12	6.4e-11	-0.384764	0.364	0.54	1.26e-06	0	DNAJB12	corneal stroma
PISD	7.23e-07	-0.385153	0.44	0.557	0.0141691	0	PISD	corneal stroma
MRPL55	7.55e-13	-0.385213	0.245	0.438	1.48e-08	0	MRPL55	corneal stroma
TXNL4A	5.4e-10	-0.386096	0.659	0.776	1.06e-05	0	TXNL4A	corneal stroma
KIAA1161	1.29e-13	-0.386387	0.134	0.33	2.52e-09	0	KIAA1161	corneal stroma
KCNQ4	4.8e-08	-0.38664	0.315	0.453	0.000941258	0	KCNQ4	corneal stroma
SF3B6	1.22e-09	-0.387156	0.417	0.572	2.39e-05	0	SF3B6	corneal stroma
CCNY	0.00231783	-0.387236	0.618	0.639	1	0	CCNY	corneal stroma
NDUFV3	7.53e-10	-0.387403	0.496	0.631	1.48e-05	0	NDUFV3	corneal stroma
CFD	1.02e-12	-0.387434	0.087	0.259	1.99e-08	0	CFD	corneal stroma
TSPAN14	1.48e-10	-0.387966	0.461	0.633	2.89e-06	0	TSPAN14	corneal stroma
LBH	6.39e-06	-0.388274	0.583	0.653	0.125316	0	LBH	corneal stroma
SNTA1	7.68e-09	-0.38848	0.219	0.36	0.000150636	0	SNTA1	corneal stroma
[truncated: 48,237 more rows]

## Sheet: PCW10_14601
14601; 10 PCW; Retina
	p_val	avg_log2FC	pct.1	pct.2	p_val_adj	cluster	gene	cell fate
RCVRN	2.58e-112	1.11008	0.835	0.361	5.05e-108	0	RCVRN	rods
NR2E3	1.09e-83	1.02622	0.828	0.418	2.14e-79	0	NR2E3	rods
CRX	9.26e-89	0.952785	0.883	0.49	1.82e-84	0	CRX	rods
SLC1A7	6.36e-83	0.943136	0.95	0.695	1.25e-78	0	SLC1A7	rods
GNB3	3.1e-90	0.928112	0.88	0.421	6.08e-86	0	GNB3	rods
SLC6A17	9.59e-76	0.898528	0.907	0.606	1.88e-71	0	SLC6A17	rods
PRPH2	4.96e-83	0.856528	0.727	0.301	9.72e-79	0	PRPH2	rods
AIPL1	1.88e-71	0.823177	0.824	0.489	3.68e-67	0	AIPL1	rods
LOXL1	7.99e-58	0.769983	0.932	0.758	1.57e-53	0	LOXL1	rods
TMEM108	1.82e-68	0.768075	0.964	0.806	3.56e-64	0	TMEM108	rods
ANKRD33B	3.68e-67	0.756942	0.957	0.829	7.21e-63	0	ANKRD33B	rods
BCL2L1	1.05e-68	0.756315	0.935	0.83	2.06e-64	0	BCL2L1	rods
EPHA8	1.49e-61	0.738695	0.851	0.589	2.92e-57	0	EPHA8	rods
CHRNB4	3.4e-59	0.681684	0.973	0.813	6.66e-55	0	CHRNB4	rods
PCBP4	9.01e-60	0.658052	0.964	0.838	1.77e-55	0	PCBP4	rods
QSOX2	3.67e-46	0.655753	0.822	0.567	7.19e-42	0	QSOX2	rods
TPRX1	5.24e-49	0.649606	0.695	0.385	1.03e-44	0	TPRX1	rods
GNB5	1.56e-46	0.64795	0.86	0.697	3.05e-42	0	GNB5	rods
MAK	3.94e-46	0.647526	0.815	0.571	7.73e-42	0	MAK	rods
CAMKK1	5.25e-50	0.646849	0.912	0.787	1.03e-45	0	CAMKK1	rods
TMEM14B	1.51e-51	0.644902	0.905	0.728	2.97e-47	0	TMEM14B	rods
RAX2	9.22e-68	0.644275	0.46	0.129	1.81e-63	0	RAX2	rods
POMGNT2	1.2e-38	0.640168	0.657	0.404	2.35e-34	0	POMGNT2	rods
PDE6G	5.55e-58	0.637519	0.639	0.269	1.09e-53	0	PDE6G	rods
ANO2	7.24e-51	0.63265	0.955	0.854	1.42e-46	0	ANO2	rods
AKNA	3.63e-42	0.625965	0.824	0.578	7.12e-38	0	AKNA	rods
ACSM3	3.84e-39	0.625383	0.788	0.577	7.54e-35	0	ACSM3	rods
SGK3	1.39e-44	0.619525	0.849	0.638	2.72e-40	0	SGK3	rods
KLHL18	8.3e-43	0.619389	0.779	0.551	1.63e-38	0	KLHL18	rods
UHRF1	1.45e-38	0.60075	0.847	0.666	2.85e-34	0	UHRF1	rods
EGFLAM	7.35e-48	0.598823	0.914	0.716	1.44e-43	0	EGFLAM	rods
CNGA1	2.51e-35	0.59821	0.641	0.391	4.92e-31	0	CNGA1	rods
RBP3	5.85e-42	0.595259	0.594	0.292	1.15e-37	0	RBP3	rods
PHF20	2.15e-40	0.594499	0.88	0.729	4.21e-36	0	PHF20	rods
RP11-637O19.3	7.65e-44	0.584313	0.921	0.786	1.5e-39	0	RP11-637O19.3	rods
CAMK2G	2.43e-37	0.579919	0.79	0.607	4.76e-33	0	CAMK2G	rods
WNT10A	1.17e-39	0.576477	0.851	0.703	2.3e-35	0	WNT10A	rods
BIN1	2.15e-49	0.570024	0.968	0.897	4.22e-45	0	BIN1	rods
OTX2	1.12e-37	0.569588	0.788	0.522	2.19e-33	0	OTX2	rods
GNB1	1.59e-35	0.565952	0.858	0.728	3.12e-31	0	GNB1	rods
FYCO1	1.06e-37	0.562375	0.889	0.69	2.08e-33	0	FYCO1	rods
UPB1	2.03e-36	0.561248	0.679	0.42	3.98e-32	0	UPB1	rods
UBAP1L	6.26e-41	0.561072	0.623	0.343	1.23e-36	0	UBAP1L	rods
FAM19A4	1.5e-34	0.559868	0.833	0.649	2.95e-30	0	FAM19A4	rods
DOCK8	3.42e-38	0.559522	0.828	0.612	6.7e-34	0	DOCK8	rods
ZBTB7A	1.02e-40	0.557199	0.907	0.755	2e-36	0	ZBTB7A	rods
ATG5	4.4e-44	0.556998	0.966	0.861	8.64e-40	0	ATG5	rods
NIPAL1	2.93e-35	0.554666	0.853	0.699	5.74e-31	0	NIPAL1	rods
FAM57B	5.68e-35	0.553375	0.801	0.59	1.11e-30	0	FAM57B	rods
EPG5	3.1e-31	0.549162	0.731	0.544	6.07e-27	0	EPG5	rods
PPP2R5E	1.85e-35	0.548533	0.887	0.773	3.64e-31	0	PPP2R5E	rods
TMEM244	3.82e-49	0.548173	0.46	0.166	7.48e-45	0	TMEM244	rods
TMEM201	2.82e-38	0.546543	0.907	0.773	5.53e-34	0	TMEM201	rods
NCOA6	2.81e-43	0.546317	0.95	0.877	5.51e-39	0	NCOA6	rods
RP1	4.84e-32	0.546267	0.788	0.617	9.49e-28	0	RP1	rods
UQCC2	6.35e-38	0.543569	0.801	0.592	1.24e-33	0	UQCC2	rods
TP53INP2	5.18e-35	0.54296	0.894	0.764	1.02e-30	0	TP53INP2	rods
DCUN1D3	5.46e-37	0.54277	0.88	0.741	1.07e-32	0	DCUN1D3	rods
STX3	6.35e-34	0.539022	0.743	0.515	1.25e-29	0	STX3	rods
PDC	5.13e-52	0.530799	0.404	0.121	1.01e-47	0	PDC	rods
KDM5B	1.81e-30	0.529719	0.833	0.707	3.55e-26	0	KDM5B	rods
FAM179A	1.33e-32	0.526577	0.896	0.753	2.6e-28	0	FAM179A	rods
NISCH	7.92e-28	0.524468	0.756	0.561	1.55e-23	0	NISCH	rods
GPR160	4.4e-30	0.51918	0.508	0.284	8.62e-26	0	GPR160	rods
LLGL2	1.14e-28	0.51897	0.691	0.489	2.24e-24	0	LLGL2	rods
TULP1	1.82e-28	0.518931	0.594	0.364	3.57e-24	0	TULP1	rods
CABP5	4.48e-51	0.516966	0.35	0.091	8.78e-47	0	CABP5	rods
TRAF1	3.46e-31	0.516684	0.763	0.535	6.78e-27	0	TRAF1	rods
C8orf44-SGK3	2.65e-39	0.516649	0.941	0.86	5.19e-35	0	C8orf44-SGK3	rods
PBRM1	1.94e-34	0.515566	0.804	0.605	3.8e-30	0	PBRM1	rods
SNAP25	2.98e-27	0.51513	0.806	0.683	5.84e-23	0	SNAP25	rods
SDC4	2.7e-28	0.514262	0.616	0.393	5.29e-24	0	SDC4	rods
DNAAF5	3.12e-23	0.51119	0.761	0.595	6.11e-19	0	DNAAF5	rods
PTP4A3	1.26e-38	0.510869	0.957	0.865	2.47e-34	0	PTP4A3	rods
IMPDH1	4.4e-30	0.50923	0.813	0.631	8.63e-26	0	IMPDH1	rods
CXCR6	2.77e-32	0.50812	0.53	0.278	5.43e-28	0	CXCR6	rods
TEPP	1.16e-29	0.506422	0.657	0.435	2.28e-25	0	TEPP	rods
HS3ST3B1	6.49e-34	0.506369	0.937	0.856	1.27e-29	0	HS3ST3B1	rods
GNAT1	8.4e-24	0.505252	0.544	0.353	1.65e-19	0	GNAT1	rods
PPARA	1.44e-29	0.504603	0.788	0.597	2.82e-25	0	PPARA	rods
CTC-435M10.3	9.75e-40	0.504524	0.953	0.851	1.91e-35	0	CTC-435M10.3	rods
YPEL2	7.39e-33	0.504434	0.896	0.779	1.45e-28	0	YPEL2	rods
EFHD2	1.92e-24	0.504392	0.763	0.615	3.77e-20	0	EFHD2	rods
ST3GAL3	8.37e-32	0.503509	0.896	0.791	1.64e-27	0	ST3GAL3	rods
PQLC1	3.41e-26	0.501231	0.831	0.71	6.69e-22	0	PQLC1	rods
SAMD7	1.82e-49	0.50072	0.438	0.144	3.56e-45	0	SAMD7	rods
PIGU	4.82e-31	0.499658	0.84	0.687	9.44e-27	0	PIGU	rods
EOGT	5.07e-30	0.499218	0.707	0.479	9.95e-26	0	EOGT	rods
EML1	1.54e-39	0.496932	0.968	0.953	3.02e-35	0	EML1	rods
SAMD11	3.46e-39	0.49592	0.937	0.898	6.78e-35	0	SAMD11	rods
TMEM9	6.06e-33	0.495439	0.851	0.724	1.19e-28	0	TMEM9	rods
FRMPD1	1.33e-30	0.494441	0.889	0.754	2.62e-26	0	FRMPD1	rods
CDHR1	2.32e-27	0.489266	0.702	0.497	4.55e-23	0	CDHR1	rods
ERI2	2.36e-35	0.489071	0.944	0.839	4.63e-31	0	ERI2	rods
CERKL	2.4e-33	0.488955	0.948	0.856	4.7e-29	0	CERKL	rods
ELSPBP1	1.42e-39	0.487788	0.427	0.165	2.79e-35	0	ELSPBP1	rods
TMEM91	7.8e-28	0.486716	0.876	0.754	1.53e-23	0	TMEM91	rods
SLC17A5	9.65e-25	0.486528	0.713	0.563	1.89e-20	0	SLC17A5	rods
LEMD1	2.43e-31	0.486429	0.892	0.805	4.76e-27	0	LEMD1	rods
IQGAP2	1.3e-25	0.486039	0.844	0.722	2.54e-21	0	IQGAP2	rods
DOC2B	3.03e-26	0.485624	0.806	0.678	5.93e-22	0	DOC2B	rods
KCNH6	5.8e-29	0.485039	0.72	0.5	1.14e-24	0	KCNH6	rods
PTPN13	3.54e-28	0.484501	0.878	0.741	6.93e-24	0	PTPN13	rods
ANKRD33	1.08e-42	0.483573	0.42	0.151	2.11e-38	0	ANKRD33	rods
MBTPS1	4.83e-26	0.483212	0.817	0.693	9.46e-22	0	MBTPS1	rods
PIP5K1C	2.37e-27	0.481316	0.871	0.746	4.64e-23	0	PIP5K1C	rods
RRP1B	2.32e-28	0.479975	0.652	0.437	4.55e-24	0	RRP1B	rods
MREG	5.12e-25	0.479809	0.679	0.486	1e-20	0	MREG	rods
MEF2D	5.39e-31	0.479485	0.907	0.831	1.06e-26	0	MEF2D	rods
RACGAP1	2.5e-29	0.479154	0.91	0.76	4.9e-25	0	RACGAP1	rods
PACSIN1	1.89e-30	0.474921	0.923	0.786	3.7e-26	0	PACSIN1	rods
NDRG3	1.98e-28	0.47407	0.761	0.573	3.89e-24	0	NDRG3	rods
ABHD14B	2.22e-27	0.473927	0.833	0.698	4.36e-23	0	ABHD14B	rods
PLA2G4C	1.81e-25	0.472645	0.641	0.434	3.56e-21	0	PLA2G4C	rods
ENDOV	1.98e-27	0.472351	0.772	0.591	3.89e-23	0	ENDOV	rods
NSMCE2	3.4e-27	0.471264	0.887	0.798	6.67e-23	0	NSMCE2	rods
SDC2	6.97e-24	0.470796	0.837	0.712	1.37e-19	0	SDC2	rods
RP11-178L8.4	7.65e-24	0.469087	0.747	0.587	1.5e-19	0	RP11-178L8.4	rods
EPB41L2	6.58e-30	0.468706	0.907	0.819	1.29e-25	0	EPB41L2	rods
ABCG4	1.44e-27	0.468614	0.596	0.368	2.82e-23	0	ABCG4	rods
NUDT14	1.09e-27	0.468614	0.612	0.379	2.13e-23	0	NUDT14	rods
CIB4	1.26e-22	0.468266	0.79	0.611	2.46e-18	0	CIB4	rods
CHTF18	7.62e-23	0.468256	0.677	0.503	1.49e-18	0	CHTF18	rods
NRL	1.5e-35	0.465222	0.957	0.906	2.94e-31	0	NRL	rods
BAIAP2L1	6.05e-22	0.463866	0.698	0.531	1.19e-17	0	BAIAP2L1	rods
SAG	2.01e-23	0.463073	0.537	0.337	3.94e-19	0	SAG	rods
GLUD1	1.54e-25	0.46255	0.781	0.632	3.02e-21	0	GLUD1	rods
GRM6	1.97e-28	0.462172	0.628	0.37	3.86e-24	0	GRM6	rods
UBE2F	7.52e-25	0.4616	0.772	0.611	1.47e-20	0	UBE2F	rods
NINL	2.3e-25	0.460884	0.876	0.754	4.51e-21	0	NINL	rods
SCN3B	5.32e-25	0.460878	0.745	0.58	1.04e-20	0	SCN3B	rods
JAZF1	4.54e-24	0.45776	0.926	0.858	8.9e-20	0	JAZF1	rods
TEX2	7.63e-21	0.45695	0.783	0.687	1.5e-16	0	TEX2	rods
SSX2IP	8.14e-27	0.456756	0.795	0.642	1.6e-22	0	SSX2IP	rods
ZNF782	1.38e-21	0.456433	0.704	0.548	2.7e-17	0	ZNF782	rods
AC010646.3	6.04e-24	0.455865	0.837	0.677	1.19e-19	0	AC010646.3	rods
SYNGR1	4.11e-22	0.455817	0.756	0.618	8.05e-18	0	SYNGR1	rods
DSCAML1	7.35e-54	0.455543	0.995	0.992	1.44e-49	0	DSCAML1	rods
CACNA1H	2.7e-24	0.453115	0.914	0.846	5.29e-20	0	CACNA1H	rods
KCNN3	3.73e-27	0.452743	0.939	0.876	7.32e-23	0	KCNN3	rods
NDRG1	1.22e-25	0.452273	0.907	0.82	2.38e-21	0	NDRG1	rods
TUBA4B	2.1e-20	0.449628	0.605	0.416	4.11e-16	0	TUBA4B	rods
FBRSL1	1.91e-35	0.449256	0.971	0.936	3.75e-31	0	FBRSL1	rods
ZNF385B	4.44e-28	0.448616	0.91	0.791	8.7e-24	0	ZNF385B	rods
TBC1D10A	3.05e-20	0.446954	0.655	0.514	5.98e-16	0	TBC1D10A	rods
EML3	2.41e-24	0.446885	0.765	0.597	4.72e-20	0	EML3	rods
TDRD7	3.73e-23	0.446521	0.591	0.396	7.31e-19	0	TDRD7	rods
SLC24A1	3.2e-22	0.446432	0.702	0.537	6.28e-18	0	SLC24A1	rods
MRPL54	1.03e-23	0.444334	0.718	0.54	2.02e-19	0	MRPL54	rods
GLYR1	1.79e-22	0.443891	0.734	0.581	3.5e-18	0	GLYR1	rods
NRF1	7.22e-21	0.441324	0.856	0.758	1.42e-16	0	NRF1	rods
NDUFV1	9.03e-26	0.440437	0.684	0.49	1.77e-21	0	NDUFV1	rods
FBXO31	1.66e-28	0.439774	0.937	0.908	3.25e-24	0	FBXO31	rods
CNTNAP4	3.75e-20	0.439095	0.826	0.691	7.36e-16	0	CNTNAP4	rods
ZFP36L2	2.06e-21	0.438763	0.79	0.652	4.04e-17	0	ZFP36L2	rods
2004-09-01	4.6e-25	0.438171	0.77	0.595	9.02e-21	0	2004-09-01	rods
HS6ST1	7.97e-25	0.434747	0.912	0.841	1.56e-20	0	HS6ST1	rods
TPRN	5.17e-21	0.432637	0.774	0.654	1.01e-16	0	TPRN	rods
GNAZ	5.93e-23	0.431604	0.894	0.815	1.16e-18	0	GNAZ	rods
URB2	1.71e-17	0.430216	0.634	0.487	3.35e-13	0	URB2	rods
EYA2	4.66e-27	0.429465	0.948	0.854	9.13e-23	0	EYA2	rods
MED8	2.48e-21	0.429034	0.58	0.39	4.87e-17	0	MED8	rods
PLCXD2	9.64e-24	0.428704	0.851	0.759	1.89e-19	0	PLCXD2	rods
EPAS1	7.56e-21	0.428408	0.837	0.742	1.48e-16	0	EPAS1	rods
GUCY2D	1.93e-23	0.427438	0.596	0.392	3.78e-19	0	GUCY2D	rods
GDPD5	2.32e-25	0.427198	0.896	0.779	4.55e-21	0	GDPD5	rods
TUBB4B	1.33e-20	0.426637	0.799	0.682	2.61e-16	0	TUBB4B	rods
ROM1	9.52e-23	0.426514	0.668	0.482	1.87e-18	0	ROM1	rods
RNF8	5.72e-20	0.426068	0.637	0.473	1.12e-15	0	RNF8	rods
CPE	9.78e-21	0.425837	0.792	0.681	1.92e-16	0	CPE	rods
CCDC60	3.34e-21	0.425427	0.853	0.757	6.56e-17	0	CCDC60	rods
CLIC4	1.3e-19	0.424962	0.806	0.718	2.56e-15	0	CLIC4	rods
UBE2F-SCLY	5.67e-25	0.424059	0.887	0.828	1.11e-20	0	UBE2F-SCLY	rods
CPT1A	2.61e-24	0.423953	0.853	0.726	5.11e-20	0	CPT1A	rods
LPCAT1	4.77e-20	0.423349	0.804	0.709	9.35e-16	0	LPCAT1	rods
ZDHHC18	4e-19	0.423038	0.702	0.552	7.85e-15	0	ZDHHC18	rods
FAM210A	1.25e-18	0.422826	0.745	0.626	2.45e-14	0	FAM210A	rods
NEUROD1	2.13e-21	0.422536	0.835	0.679	4.17e-17	0	NEUROD1	rods
C2orf71	4.36e-20	0.420764	0.555	0.366	8.56e-16	0	C2orf71	rods
PPP1R21	4.89e-23	0.420171	0.781	0.624	9.6e-19	0	PPP1R21	rods
FOXO6	3.36e-26	0.419417	0.935	0.862	6.59e-22	0	FOXO6	rods
CELF6	2.09e-22	0.417351	0.804	0.678	4.11e-18	0	CELF6	rods
CRHR1	2.11e-24	0.416412	0.941	0.846	4.15e-20	0	CRHR1	rods
DNAJC5	2.93e-23	0.415965	0.722	0.552	5.74e-19	0	DNAJC5	rods
SUSD6	2.03e-25	0.415067	0.935	0.866	3.98e-21	0	SUSD6	rods
CAMSAP1	1.96e-18	0.414865	0.819	0.739	3.84e-14	0	CAMSAP1	rods
RD3	3.13e-22	0.414558	0.616	0.401	6.14e-18	0	RD3	rods
RP1L1	7.71e-21	0.414282	0.801	0.655	1.51e-16	0	RP1L1	rods
ACAP3	5.33e-25	0.41398	0.93	0.838	1.05e-20	0	ACAP3	rods
SEMA3F	2.33e-23	0.413582	0.815	0.661	4.57e-19	0	SEMA3F	rods
INAFM1	1.37e-23	0.41213	0.844	0.714	2.69e-19	0	INAFM1	rods
WFDC1	2.29e-22	0.411277	0.609	0.408	4.49e-18	0	WFDC1	rods
CARMIL1	2.92e-20	0.410793	0.874	0.797	5.73e-16	0	CARMIL1	rods
SMIM22	2.7e-23	0.410591	0.397	0.195	5.3e-19	0	SMIM22	rods
PARD6B	4.28e-22	0.410589	0.767	0.64	8.39e-18	0	PARD6B	rods
GUK1	1.85e-20	0.40952	0.749	0.595	3.64e-16	0	GUK1	rods
RP11-106M3.5	3.41e-25	0.409429	0.907	0.831	6.69e-21	0	RP11-106M3.5	rods
EEF2K	1.9e-21	0.407781	0.799	0.658	3.72e-17	0	EEF2K	rods
RP11-106M3.2	1.89e-22	0.407271	0.856	0.77	3.7e-18	0	RP11-106M3.2	rods
RTN4RL1	4.22e-26	0.405522	0.935	0.891	8.27e-22	0	RTN4RL1	rods
NUMBL	2.64e-22	0.4045	0.765	0.609	5.17e-18	0	NUMBL	rods
ZC3H4	3.14e-25	0.402889	0.88	0.786	6.16e-21	0	ZC3H4	rods
ECHDC2	4.58e-18	0.401673	0.596	0.427	8.99e-14	0	ECHDC2	rods
NRTN	1.83e-17	0.401442	0.54	0.384	3.59e-13	0	NRTN	rods
PNPLA3	1.85e-18	0.401442	0.815	0.71	3.62e-14	0	PNPLA3	rods
CHRNA3	7.72e-20	0.401176	0.641	0.458	1.51e-15	0	CHRNA3	rods
LRIT2	6.79e-26	0.400558	0.372	0.167	1.33e-21	0	LRIT2	rods
PKMYT1	6.32e-18	0.400138	0.752	0.631	1.24e-13	0	PKMYT1	rods
DLL4	4.62e-19	0.399495	0.819	0.7	9.05e-15	0	DLL4	rods
PRDM1	3.96e-23	0.395964	0.607	0.372	7.77e-19	0	PRDM1	rods
LAPTM4B	9.22e-17	0.395893	0.781	0.673	1.81e-12	0	LAPTM4B	rods
CTSH	3.09e-17	0.395289	0.589	0.425	6.06e-13	0	CTSH	rods
GRK1	7.5e-15	0.395242	0.594	0.466	1.47e-10	0	GRK1	rods
RESP18	3.05e-27	0.394221	0.42	0.197	5.99e-23	0	RESP18	rods
TNFRSF19	1.49e-17	0.393844	0.835	0.741	2.91e-13	0	TNFRSF19	rods
HSPA4	2.76e-18	0.393268	0.758	0.651	5.41e-14	0	HSPA4	rods
FAM89A	3.23e-19	0.392807	0.677	0.502	6.33e-15	0	FAM89A	rods
COMTD1	4.01e-18	0.392204	0.555	0.387	7.87e-14	0	COMTD1	rods
SERINC4	1.83e-21	0.392161	0.576	0.379	3.59e-17	0	SERINC4	rods
SOX1	6.6e-21	0.390971	0.512	0.31	1.29e-16	0	SOX1	rods
LCA5L	1.3e-17	0.39076	0.625	0.477	2.55e-13	0	LCA5L	rods
NAGS	1.22e-16	0.390558	0.569	0.417	2.4e-12	0	NAGS	rods
KIF1B	3.77e-20	0.390307	0.903	0.843	7.39e-16	0	KIF1B	rods
MOK	5.62e-19	0.390186	0.86	0.739	1.1e-14	0	MOK	rods
TTC12	9.74e-17	0.390044	0.675	0.537	1.91e-12	0	TTC12	rods
RASGEF1C	2.29e-19	0.38995	0.874	0.776	4.49e-15	0	RASGEF1C	rods
PDE6B	7.38e-20	0.389631	0.828	0.698	1.45e-15	0	PDE6B	rods
ABL2	7.14e-14	0.389422	0.695	0.601	1.4e-09	0	ABL2	rods
HYPK	3.99e-21	0.388802	0.576	0.381	7.83e-17	0	HYPK	rods
SLC35C2	4.52e-16	0.388467	0.666	0.54	8.86e-12	0	SLC35C2	rods
FXYD3	2.83e-21	0.388314	0.799	0.623	5.54e-17	0	FXYD3	rods
CABP4	1.77e-33	0.387653	0.359	0.133	3.46e-29	0	CABP4	rods
FRMPD2	7.1e-16	0.387287	0.698	0.558	1.39e-11	0	FRMPD2	rods
GPSM1	4.31e-19	0.387223	0.905	0.844	8.46e-15	0	GPSM1	rods
SRRM4	2e-25	0.387066	0.98	0.932	3.93e-21	0	SRRM4	rods
SETD3	2.21e-21	0.386806	0.876	0.804	4.33e-17	0	SETD3	rods
IGSF9	2.62e-19	0.38668	0.867	0.772	5.15e-15	0	IGSF9	rods
KANK1	4.42e-20	0.386271	0.921	0.867	8.67e-16	0	KANK1	rods
ABHD14A-ACY1	1.44e-17	0.385984	0.77	0.653	2.82e-13	0	ABHD14A-ACY1	rods
PLEKHB1	1.45e-18	0.385966	0.767	0.616	2.84e-14	0	PLEKHB1	rods
MAPK8	1.12e-15	0.385951	0.765	0.677	2.2e-11	0	MAPK8	rods
ARHGEF11	4.21e-14	0.384293	0.749	0.667	8.25e-10	0	ARHGEF11	rods
PLCD3	2.91e-16	0.384278	0.72	0.61	5.71e-12	0	PLCD3	rods
MRPS11	1.25e-18	0.384207	0.607	0.434	2.46e-14	0	MRPS11	rods
SZT2	2.65e-18	0.384097	0.679	0.512	5.19e-14	0	SZT2	rods
TLN2	1.62e-23	0.383978	0.971	0.908	3.17e-19	0	TLN2	rods
UBE3C	4.07e-18	0.382854	0.842	0.746	7.98e-14	0	UBE3C	rods
HS3ST4	3.89e-17	0.382687	0.883	0.778	7.63e-13	0	HS3ST4	rods
C1D	4.33e-17	0.381503	0.512	0.344	8.5e-13	0	C1D	rods
CC2D2A	4.56e-15	0.381482	0.716	0.616	8.95e-11	0	CC2D2A	rods
MAP7	1.64e-18	0.381381	0.86	0.778	3.22e-14	0	MAP7	rods
KCTD17	5.43e-17	0.381315	0.546	0.373	1.06e-12	0	KCTD17	rods
TTC27	1.15e-19	0.380956	0.713	0.549	2.26e-15	0	TTC27	rods
PIEZO1	1.19e-20	0.379557	0.892	0.816	2.34e-16	0	PIEZO1	rods
USP2	1.02e-19	0.378694	0.901	0.832	2e-15	0	USP2	rods
GABBR2	2.55e-22	0.377574	0.98	0.9	5.01e-18	0	GABBR2	rods
MESP2	7.22e-17	0.377085	0.578	0.418	1.42e-12	0	MESP2	rods
RP11-216L13.17	3.81e-22	0.377037	0.822	0.701	7.46e-18	0	RP11-216L13.17	rods
LRRC57	2.78e-18	0.376311	0.58	0.401	5.46e-14	0	LRRC57	rods
TPD52	5.36e-17	0.374714	0.801	0.691	1.05e-12	0	TPD52	rods
SLC24A4	5.29e-16	0.373606	0.788	0.622	1.04e-11	0	SLC24A4	rods
C16orf74	8.65e-17	0.373109	0.779	0.686	1.7e-12	0	C16orf74	rods
MSI1	4.09e-21	0.372536	0.905	0.833	8.03e-17	0	MSI1	rods
KIFC3	2.28e-15	0.372238	0.862	0.793	4.47e-11	0	KIFC3	rods
TUBA4A	1.71e-14	0.372141	0.792	0.694	3.35e-10	0	TUBA4A	rods
NEK5	1.77e-15	0.371591	0.614	0.455	3.47e-11	0	NEK5	rods
TBC1D8	2.86e-17	0.37096	0.894	0.842	5.61e-13	0	TBC1D8	rods
HKR1	1.83e-17	0.37091	0.792	0.699	3.59e-13	0	HKR1	rods
R3HDM4	1.31e-18	0.370226	0.598	0.416	2.58e-14	0	R3HDM4	rods
VPS36	1.73e-15	0.370145	0.628	0.496	3.39e-11	0	VPS36	rods
C15orf61	1.82e-18	0.369858	0.56	0.389	3.58e-14	0	C15orf61	rods
CLPB	3.89e-18	0.369385	0.853	0.759	7.62e-14	0	CLPB	rods
CNGA3	4.37e-15	0.369278	0.67	0.509	8.56e-11	0	CNGA3	rods
SPON2	4.66e-15	0.368148	0.826	0.707	9.14e-11	0	SPON2	rods
ABHD12	1.51e-17	0.367008	0.862	0.771	2.95e-13	0	ABHD12	rods
NPAS4	2.37e-17	0.366923	0.553	0.385	4.65e-13	0	NPAS4	rods
SERF2	7.56e-17	0.366684	0.837	0.753	1.48e-12	0	SERF2	rods
RALGPS2	1.61e-16	0.366281	0.777	0.683	3.16e-12	0	RALGPS2	rods
LRFN1	9.64e-17	0.365724	0.492	0.325	1.89e-12	0	LRFN1	rods
SLC6A9	8.82e-19	0.365165	0.896	0.851	1.73e-14	0	SLC6A9	rods
MYO9A	3.38e-16	0.364674	0.804	0.713	6.63e-12	0	MYO9A	rods
THOP1	4.34e-20	0.364139	0.754	0.61	8.51e-16	0	THOP1	rods
NPAS1	8.21e-13	0.363882	0.619	0.5	1.61e-08	0	NPAS1	rods
DRD4	2.7e-14	0.36332	0.488	0.338	5.3e-10	0	DRD4	rods
2012-09-01	1.5e-19	0.363269	0.366	0.186	2.94e-15	0	2012-09-01	rods
RP11-296A16.1	1.3e-16	0.362944	0.842	0.759	2.54e-12	0	RP11-296A16.1	rods
PFKP	5.62e-16	0.36198	0.77	0.649	1.1e-11	0	PFKP	rods
RRM2B	2.34e-15	0.361546	0.819	0.711	4.6e-11	0	RRM2B	rods
NR2F6	1.11e-16	0.361486	0.826	0.713	2.17e-12	0	NR2F6	rods
ADIPOR1	2.18e-14	0.36095	0.544	0.395	4.28e-10	0	ADIPOR1	rods
KIF21B	4.09e-15	0.360852	0.828	0.771	8.01e-11	0	KIF21B	rods
BRI3	7.87e-18	0.359223	0.828	0.757	1.54e-13	0	BRI3	rods
SLC7A5	5.58e-16	0.35895	0.898	0.837	1.1e-11	0	SLC7A5	rods
RGS9BP	6.5e-14	0.358898	0.679	0.586	1.27e-09	0	RGS9BP	rods
ABCA1	2.68e-14	0.358889	0.824	0.73	5.26e-10	0	ABCA1	rods
SCMH1	7.74e-15	0.358723	0.722	0.616	1.52e-10	0	SCMH1	rods
LAMA5	1.02e-17	0.358468	0.878	0.78	2e-13	0	LAMA5	rods
TECPR1	4.48e-17	0.358328	0.725	0.583	8.79e-13	0	TECPR1	rods
FAM120A	5.76e-15	0.358262	0.767	0.692	1.13e-10	0	FAM120A	rods
LMOD1	1.29e-17	0.358093	0.652	0.471	2.52e-13	0	LMOD1	rods
C1orf228	2.2e-14	0.355654	0.752	0.666	4.31e-10	0	C1orf228	rods
CNNM4	4.75e-14	0.355159	0.765	0.685	9.31e-10	0	CNNM4	rods
EML4	1.55e-16	0.354403	0.826	0.711	3.05e-12	0	EML4	rods
SLCO1A2	4.17e-23	0.354209	0.409	0.207	8.18e-19	0	SLCO1A2	rods
WHRN	5.27e-19	0.354042	0.894	0.824	1.03e-14	0	WHRN	rods
C10orf76	3.16e-16	0.353509	0.84	0.759	6.2e-12	0	C10orf76	rods
CCDC183	6.84e-19	0.353369	0.578	0.395	1.34e-14	0	CCDC183	rods
RTBDN	1.36e-17	0.353209	0.639	0.48	2.67e-13	0	RTBDN	rods
ZNF488	5.67e-15	0.353186	0.749	0.62	1.11e-10	0	ZNF488	rods
RNF215	2.91e-14	0.351302	0.847	0.762	5.7e-10	0	RNF215	rods
ZBTB7B	1.3e-15	0.351285	0.887	0.824	2.56e-11	0	ZBTB7B	rods
MESDC2	1.64e-14	0.350821	0.63	0.495	3.21e-10	0	MESDC2	rods
KPNA3	1.65e-17	0.350315	0.824	0.72	3.23e-13	0	KPNA3	rods
ATP7B	3.81e-16	0.350226	0.765	0.674	7.47e-12	0	ATP7B	rods
NLK	5.43e-15	0.349229	0.804	0.711	1.06e-10	0	NLK	rods
SLC12A5	8.21e-18	0.349186	0.862	0.69	1.61e-13	0	SLC12A5	rods
TIGAR	1.68e-14	0.34895	0.781	0.707	3.29e-10	0	TIGAR	rods
DUSP14	3.84e-14	0.348528	0.623	0.504	7.53e-10	0	DUSP14	rods
DUSP8	8.65e-15	0.348323	0.765	0.673	1.7e-10	0	DUSP8	rods
AANAT	2.13e-13	0.347303	0.695	0.609	4.18e-09	0	AANAT	rods
CDCA3	6.74e-17	0.347292	0.894	0.822	1.32e-12	0	CDCA3	rods
RP11-624J6.2	3.78e-20	0.347009	0.427	0.231	7.42e-16	0	RP11-624J6.2	rods
REEP6	5.46e-17	0.346886	0.826	0.731	1.07e-12	0	REEP6	rods
TBL1XR1	2.42e-13	0.34632	0.763	0.694	4.74e-09	0	TBL1XR1	rods
AMER3	7.73e-14	0.345725	0.58	0.435	1.52e-09	0	AMER3	rods
CTDSPL2	3.65e-13	0.345248	0.727	0.644	7.16e-09	0	CTDSPL2	rods
C9orf66	1.68e-25	0.344633	0.368	0.166	3.29e-21	0	C9orf66	rods
DDX10	1.49e-11	0.343997	0.691	0.605	2.93e-07	0	DDX10	rods
ARF1	2.99e-13	0.343861	0.643	0.521	5.87e-09	0	ARF1	rods
ZNF687	3.66e-15	0.343616	0.84	0.789	7.19e-11	0	ZNF687	rods
YPEL5	6.19e-16	0.343118	0.799	0.699	1.21e-11	0	YPEL5	rods
TSNARE1	3.65e-18	0.343067	0.939	0.886	7.15e-14	0	TSNARE1	rods
NAPB	7.31e-15	0.343013	0.619	0.494	1.43e-10	0	NAPB	rods
PXN	6.39e-14	0.342297	0.837	0.786	1.25e-09	0	PXN	rods
MPL	3.54e-15	0.341997	0.519	0.378	6.94e-11	0	MPL	rods
TP53	2.23e-14	0.341895	0.797	0.732	4.37e-10	0	TP53	rods
MTOR	1.14e-16	0.34043	0.795	0.676	2.24e-12	0	MTOR	rods
ZDHHC8	5.81e-14	0.339407	0.637	0.504	1.14e-09	0	ZDHHC8	rods
DUSP5	2.97e-12	0.339089	0.716	0.625	5.83e-08	0	DUSP5	rods
MMACHC	5.69e-14	0.338975	0.551	0.415	1.12e-09	0	MMACHC	rods
DGCR2	2.06e-11	0.33895	0.72	0.647	4.03e-07	0	DGCR2	rods
RP11-724O16.1	1.12e-13	0.338886	0.546	0.412	2.2e-09	0	RP11-724O16.1	rods
ITSN1	3.34e-20	0.338873	0.953	0.908	6.54e-16	0	ITSN1	rods
ADAM11	9.31e-16	0.338783	0.84	0.756	1.83e-11	0	ADAM11	rods
MINK1	1.69e-14	0.338751	0.761	0.643	3.31e-10	0	MINK1	rods
MTA2	7.49e-15	0.338148	0.749	0.66	1.47e-10	0	MTA2	rods
CDR2	3.55e-11	0.338074	0.695	0.63	6.96e-07	0	CDR2	rods
DPP3	1.82e-12	0.337896	0.573	0.467	3.57e-08	0	DPP3	rods
SELE	3.42e-19	0.337617	0.341	0.166	6.7e-15	0	SELE	rods
SREBF1	1.27e-16	0.337594	0.887	0.835	2.49e-12	0	SREBF1	rods
C2orf50	2.44e-15	0.336136	0.573	0.403	4.79e-11	0	C2orf50	rods
RCBTB1	4.96e-14	0.336104	0.677	0.53	9.72e-10	0	RCBTB1	rods
AC138028.1	6.99e-18	0.335808	0.368	0.198	1.37e-13	0	AC138028.1	rods
SMARCD2	4.49e-12	0.335805	0.677	0.586	8.79e-08	0	SMARCD2	rods
RAB40C	3.5e-15	0.335713	0.831	0.767	6.86e-11	0	RAB40C	rods
NFIC	3.68e-19	0.335679	0.95	0.905	7.22e-15	0	NFIC	rods
BBS5	4.19e-13	0.335623	0.53	0.395	8.22e-09	0	BBS5	rods
LHX3	1.48e-11	0.335541	0.508	0.387	2.9e-07	0	LHX3	rods
ZNF532	8.42e-15	0.335391	0.849	0.755	1.65e-10	0	ZNF532	rods
PTER	1.69e-13	0.335349	0.582	0.433	3.3e-09	0	PTER	rods
NFE2L1	2.38e-16	0.335229	0.79	0.719	4.66e-12	0	NFE2L1	rods
IGSF21	5.9e-20	0.335146	0.973	0.86	1.16e-15	0	IGSF21	rods
UHRF2	5.63e-12	0.334918	0.709	0.624	1.1e-07	0	UHRF2	rods
GPBP1	3.45e-13	0.334831	0.84	0.796	6.76e-09	0	GPBP1	rods
ABHD8	2.04e-17	0.334676	0.867	0.796	4.01e-13	0	ABHD8	rods
R3HCC1	2.26e-14	0.334514	0.467	0.32	4.43e-10	0	R3HCC1	rods
TLL1	1.17e-12	0.334271	0.749	0.649	2.29e-08	0	TLL1	rods
ERN1	1.19e-16	0.334109	0.799	0.677	2.33e-12	0	ERN1	rods
PECR	3.63e-13	0.334032	0.779	0.694	7.13e-09	0	PECR	rods
SYVN1	1.82e-12	0.33286	0.761	0.685	3.56e-08	0	SYVN1	rods
NHLH1	3.08e-15	0.332855	0.377	0.219	6.03e-11	0	NHLH1	rods
ADD1	4.53e-12	0.332646	0.806	0.741	8.87e-08	0	ADD1	rods
NIPBL	2.47e-13	0.332635	0.795	0.712	4.83e-09	0	NIPBL	rods
GKAP1	2.05e-11	0.332606	0.51	0.381	4.02e-07	0	GKAP1	rods
CCDC186	3.57e-12	0.332145	0.564	0.442	7.01e-08	0	CCDC186	rods
ACOX2	1.56e-14	0.331331	0.632	0.49	3.06e-10	0	ACOX2	rods
SLC6A6	5.45e-15	0.331158	0.885	0.833	1.07e-10	0	SLC6A6	rods
MAP2K2	6.6e-15	0.331008	0.603	0.458	1.29e-10	0	MAP2K2	rods
C1QTNF2	1.45e-12	0.330307	0.456	0.321	2.85e-08	0	C1QTNF2	rods
KCNK5	3.54e-14	0.330301	0.639	0.489	6.95e-10	0	KCNK5	rods
FBXW11	2.03e-14	0.330161	0.828	0.742	3.98e-10	0	FBXW11	rods
ZBED4	1.36e-14	0.329904	0.695	0.599	2.67e-10	0	ZBED4	rods
ABHD14A	1.94e-11	0.329186	0.639	0.535	3.81e-07	0	ABHD14A	rods
SETD2	2.02e-12	0.329183	0.758	0.673	3.96e-08	0	SETD2	rods
HOOK1	3.83e-14	0.329153	0.526	0.372	7.51e-10	0	HOOK1	rods
GINS2	3.85e-16	0.32894	0.58	0.412	7.55e-12	0	GINS2	rods
CASZ1	7.72e-31	0.328026	1	0.99	1.51e-26	0	CASZ1	rods
UBXN4	5.48e-12	0.327943	0.686	0.598	1.07e-07	0	UBXN4	rods
DIP2A	1.16e-13	0.327117	0.736	0.637	2.27e-09	0	DIP2A	rods
GAPVD1	7.27e-14	0.327096	0.657	0.546	1.43e-09	0	GAPVD1	rods
ABCA12	2.33e-13	0.3267	0.564	0.416	4.56e-09	0	ABCA12	rods
ULK1	8.07e-15	0.326496	0.752	0.645	1.58e-10	0	ULK1	rods
SLC12A6	9.28e-11	0.326133	0.664	0.577	1.82e-06	0	SLC12A6	rods
ZFR2	1.65e-10	0.326089	0.549	0.432	3.23e-06	0	ZFR2	rods
HES2	2.09e-11	0.325333	0.537	0.416	4.1e-07	0	HES2	rods
GNG13	5.06e-14	0.324828	0.354	0.21	9.93e-10	0	GNG13	rods
GRIK3	1.25e-17	0.324481	0.948	0.909	2.45e-13	0	GRIK3	rods
MMP2	8.66e-12	0.324215	0.772	0.683	1.7e-07	0	MMP2	rods
CRHR1.1	3.51e-10	0.324062	0.756	0.669	6.89e-06	0	CRHR1.1	rods
SIK3	3.82e-15	0.323983	0.914	0.869	7.49e-11	0	SIK3	rods
BRD3	5.49e-12	0.3238	0.779	0.719	1.08e-07	0	BRD3	rods
TLX2	1.32e-13	0.323697	0.467	0.32	2.58e-09	0	TLX2	rods
ANKRD27	1.11e-11	0.32362	0.72	0.661	2.18e-07	0	ANKRD27	rods
HNRNPUL1	1.19e-13	0.323231	0.804	0.749	2.34e-09	0	HNRNPUL1	rods
SGTA	3.79e-13	0.323008	0.691	0.594	7.42e-09	0	SGTA	rods
IFT22	8.16e-11	0.322746	0.51	0.39	1.6e-06	0	IFT22	rods
ZNF540	1.93e-16	0.322424	0.72	0.584	3.79e-12	0	ZNF540	rods
DDX24	7.3e-10	0.322255	0.607	0.528	1.43e-05	0	DDX24	rods
GPR180	3.07e-09	0.322121	0.607	0.511	6.01e-05	0	GPR180	rods
CYP46A1	3.73e-11	0.322025	0.747	0.667	7.31e-07	0	CYP46A1	rods
RSPO2	1.8e-10	0.321952	0.587	0.462	3.53e-06	0	RSPO2	rods
FAM161A	2.4e-14	0.321891	0.747	0.626	4.71e-10	0	FAM161A	rods
LENG8	9.41e-12	0.321	0.612	0.519	1.85e-07	0	LENG8	rods
SPATA2L	4.38e-15	0.320218	0.698	0.575	8.58e-11	0	SPATA2L	rods
MAP3K13	1.42e-14	0.320177	0.847	0.764	2.78e-10	0	MAP3K13	rods
CRB2	9.79e-13	0.319595	0.865	0.772	1.92e-08	0	CRB2	rods
AGPAT3	6.13e-14	0.319177	0.867	0.822	1.2e-09	0	AGPAT3	rods
PCNA	2.54e-14	0.318737	0.81	0.744	4.97e-10	0	PCNA	rods
GYS1	3.04e-14	0.318314	0.783	0.698	5.96e-10	0	GYS1	rods
RREB1	8.08e-15	0.318191	0.892	0.843	1.58e-10	0	RREB1	rods
CARD19	2.73e-12	0.318009	0.752	0.67	5.35e-08	0	CARD19	rods
COL16A1	1.4e-13	0.317413	0.763	0.654	2.74e-09	0	COL16A1	rods
EPN2	7.05e-13	0.3174	0.777	0.687	1.38e-08	0	EPN2	rods
MRPL34	2.57e-12	0.317045	0.763	0.711	5.04e-08	0	MRPL34	rods
FGFR1OP	8.48e-13	0.316606	0.693	0.583	1.66e-08	0	FGFR1OP	rods
SAFB	6.6e-12	0.316491	0.684	0.58	1.29e-07	0	SAFB	rods
NTNG2	4.35e-15	0.316409	0.948	0.938	8.53e-11	0	NTNG2	rods
KIF19	1.84e-10	0.315891	0.716	0.64	3.6e-06	0	KIF19	rods
UBL3	3.11e-13	0.315534	0.774	0.69	6.1e-09	0	UBL3	rods
WBP2NL	7.06e-15	0.315089	0.42	0.266	1.38e-10	0	WBP2NL	rods
C1orf112	1.93e-15	0.314555	0.693	0.548	3.79e-11	0	C1orf112	rods
MAP4K3	5.69e-13	0.314334	0.804	0.727	1.11e-08	0	MAP4K3	rods
LRCH4	1.4e-12	0.314295	0.792	0.722	2.75e-08	0	LRCH4	rods
ATP5A1	1.09e-12	0.314292	0.749	0.641	2.14e-08	0	ATP5A1	rods
MSH3	2.26e-11	0.313376	0.704	0.651	4.43e-07	0	MSH3	rods
ACY1	2.63e-12	0.312835	0.458	0.317	5.15e-08	0	ACY1	rods
PLCH2	2.61e-16	0.312499	0.973	0.941	5.11e-12	0	PLCH2	rods
C19orf81	4.7e-14	0.31209	0.749	0.633	9.22e-10	0	C19orf81	rods
LIN54	4.77e-11	0.312042	0.758	0.68	9.35e-07	0	LIN54	rods
METTL8	2.07e-12	0.311599	0.786	0.718	4.06e-08	0	METTL8	rods
LNX2	2.53e-13	0.311566	0.754	0.646	4.95e-09	0	LNX2	rods
MEI1	3.71e-09	0.311517	0.573	0.468	7.27e-05	0	MEI1	rods
CLMN	2.7e-11	0.310788	0.822	0.763	5.3e-07	0	CLMN	rods
CPNE6	8.48e-12	0.310754	0.35	0.221	1.66e-07	0	CPNE6	rods
CBFA2T2	1.52e-14	0.310147	0.824	0.772	2.97e-10	0	CBFA2T2	rods
FADS3	2.08e-11	0.309957	0.517	0.395	4.08e-07	0	FADS3	rods
CLN6	7.85e-13	0.309756	0.842	0.775	1.54e-08	0	CLN6	rods
TIPARP	1.21e-11	0.30936	0.772	0.696	2.36e-07	0	TIPARP	rods
SPTBN1	3.55e-16	0.30906	0.95	0.918	6.96e-12	0	SPTBN1	rods
WDTC1	1.02e-13	0.308836	0.808	0.731	2e-09	0	WDTC1	rods
TMCC2	5.91e-14	0.308671	0.81	0.78	1.16e-09	0	TMCC2	rods
BRPF3	1.69e-11	0.308183	0.729	0.642	3.3e-07	0	BRPF3	rods
ARID3B	2.13e-13	0.308086	0.806	0.716	4.18e-09	0	ARID3B	rods
KIAA0825	6.19e-13	0.308054	0.833	0.772	1.21e-08	0	KIAA0825	rods
CARNMT1	1.39e-11	0.307867	0.655	0.548	2.73e-07	0	CARNMT1	rods
GAS7	2.63e-15	0.307594	0.944	0.877	5.16e-11	0	GAS7	rods
SNAI3	5.83e-11	0.307501	0.454	0.329	1.14e-06	0	SNAI3	rods
SNAP23	1.74e-11	0.307483	0.655	0.54	3.41e-07	0	SNAP23	rods
ZBTB40	1.81e-11	0.307426	0.709	0.624	3.54e-07	0	ZBTB40	rods
CTD-2574D22.6	2.17e-11	0.307399	0.718	0.604	4.26e-07	0	CTD-2574D22.6	rods
OCIAD1	4.26e-11	0.307319	0.632	0.529	8.35e-07	0	OCIAD1	rods
OVCA2	1.21e-13	0.307294	0.655	0.525	2.37e-09	0	OVCA2	rods
NRIP1	2.93e-11	0.307149	0.871	0.811	5.75e-07	0	NRIP1	rods
NDUFV3	1.55e-08	0.307144	0.756	0.702	0.000303287	0	NDUFV3	rods
C1orf174	4.9e-13	0.306641	0.835	0.765	9.6e-09	0	C1orf174	rods
CCDC51	3.94e-13	0.30642	0.585	0.431	7.72e-09	0	CCDC51	rods
CPPED1	4.39e-10	0.305641	0.668	0.578	8.61e-06	0	CPPED1	rods
KSR1	1.63e-15	0.305639	0.941	0.907	3.2e-11	0	KSR1	rods
GRM2	2.62e-09	0.305603	0.535	0.437	5.14e-05	0	GRM2	rods
ANAPC16	9.44e-11	0.305575	0.569	0.458	1.85e-06	0	ANAPC16	rods
AP000304.12	1.89e-20	0.305313	0.98	0.962	3.71e-16	0	AP000304.12	rods
NUDT3	6.37e-11	0.305262	0.765	0.69	1.25e-06	0	NUDT3	rods
DHDDS	1.38e-11	0.30524	0.641	0.534	2.71e-07	0	DHDDS	rods
EPS8	1.92e-12	0.305144	0.887	0.839	3.77e-08	0	EPS8	rods
B3GLCT	6.27e-12	0.304875	0.806	0.747	1.23e-07	0	B3GLCT	rods
SLC17A7	4.03e-12	0.304388	0.783	0.675	7.9e-08	0	SLC17A7	rods
ZBTB24	1.62e-13	0.304	0.591	0.45	3.17e-09	0	ZBTB24	rods
PRDX1	3.05e-13	0.303716	0.562	0.426	5.98e-09	0	PRDX1	rods
POLD3	5.81e-13	0.303634	0.804	0.726	1.14e-08	0	POLD3	rods
RAB28	3.68e-12	0.303584	0.727	0.63	7.22e-08	0	RAB28	rods
NAA35	2.13e-10	0.303451	0.695	0.608	4.17e-06	0	NAA35	rods
C1orf145	2.22e-11	0.303427	0.63	0.495	4.35e-07	0	C1orf145	rods
RHOA	1.59e-13	0.302799	0.774	0.662	3.11e-09	0	RHOA	rods
DNMT3A	6.17e-17	0.302085	0.95	0.948	1.21e-12	0	DNMT3A	rods
PLD4	6.97e-09	0.301856	0.661	0.585	0.000136711	0	PLD4	rods
IRAK4	9.34e-12	0.301829	0.576	0.441	1.83e-07	0	IRAK4	rods
SLC38A5	3.35e-12	0.30175	0.357	0.218	6.56e-08	0	SLC38A5	rods
PRUNE2	2.36e-09	0.30163	0.765	0.743	4.63e-05	0	PRUNE2	rods
SLC35F3	3.39e-13	0.301405	0.898	0.851	6.65e-09	0	SLC35F3	rods
GADD45G	3.05e-10	0.301034	0.727	0.668	5.98e-06	0	GADD45G	rods
PROM1	2.05e-12	0.300964	0.892	0.798	4.01e-08	0	PROM1	rods
USP34	1.76e-12	0.30092	0.833	0.78	3.45e-08	0	USP34	rods
HOOK2	1.78e-21	0.300266	0.989	0.979	3.49e-17	0	HOOK2	rods
C10orf10	3.85e-13	0.299971	0.578	0.454	7.55e-09	0	C10orf10	rods
ACO2	9.28e-12	0.299879	0.725	0.619	1.82e-07	0	ACO2	rods
MIB2	7.73e-13	0.299801	0.77	0.684	1.52e-08	0	MIB2	rods
ZNF571	1.54e-12	0.299795	0.549	0.419	3.02e-08	0	ZNF571	rods
FBXL15	1.63e-10	0.299583	0.702	0.632	3.19e-06	0	FBXL15	rods
HDAC5	1.12e-11	0.299511	0.853	0.793	2.19e-07	0	HDAC5	rods
RP11-474G23.1	7.92e-13	0.299408	0.907	0.848	1.55e-08	0	RP11-474G23.1	rods
GTDC1	1.81e-14	0.299034	0.91	0.852	3.56e-10	0	GTDC1	rods
FAM84B	2.22e-12	0.298673	0.713	0.603	4.36e-08	0	FAM84B	rods
TUBA1B	4.7e-14	0.298066	0.734	0.614	9.22e-10	0	TUBA1B	rods
MUC5B	3.19e-10	0.29788	0.524	0.413	6.26e-06	0	MUC5B	rods
PTMA	3.56e-12	0.297017	0.896	0.885	6.98e-08	0	PTMA	rods
PUS7L	2.88e-12	0.296872	0.562	0.425	5.65e-08	0	PUS7L	rods
IQSEC1	8.63e-19	0.296774	0.982	0.976	1.69e-14	0	IQSEC1	rods
CNOT11	3.72e-10	0.296549	0.578	0.468	7.29e-06	0	CNOT11	rods
ABCB8	3.52e-11	0.296037	0.707	0.615	6.9e-07	0	ABCB8	rods
DNAH1	7.37e-10	0.296023	0.603	0.499	1.45e-05	0	DNAH1	rods
ZNF775	2.7e-18	0.295823	0.957	0.933	5.29e-14	0	ZNF775	rods
CDKL5	2.31e-10	0.295784	0.716	0.645	4.53e-06	0	CDKL5	rods
CACNG5	3.62e-10	0.295672	0.657	0.542	7.09e-06	0	CACNG5	rods
C16orf70	4.25e-11	0.295588	0.562	0.447	8.33e-07	0	C16orf70	rods
RCAN1	2.59e-12	0.295272	0.851	0.748	5.08e-08	0	RCAN1	rods
CASP9	7.68e-14	0.29525	0.91	0.857	1.51e-09	0	CASP9	rods
ANKK1	3.19e-12	0.294676	0.379	0.249	6.26e-08	0	ANKK1	rods
ABTB1	4.31e-08	0.293999	0.474	0.377	0.000844261	0	ABTB1	rods
ARG2	5.78e-12	0.293432	0.544	0.41	1.13e-07	0	ARG2	rods
STRBP	1.79e-08	0.29331	0.693	0.635	0.000350037	0	STRBP	rods
ZDHHC5	4.53e-13	0.293299	0.808	0.728	8.88e-09	0	ZDHHC5	rods
FAM35A	1.07e-10	0.293164	0.65	0.567	2.09e-06	0	FAM35A	rods
PSMG1	3.46e-09	0.293027	0.535	0.428	6.79e-05	0	PSMG1	rods
DNAJC6	2.85e-12	0.29298	0.831	0.767	5.58e-08	0	DNAJC6	rods
SLC45A4	1.19e-11	0.292776	0.858	0.814	2.33e-07	0	SLC45A4	rods
EPB41L5	2.24e-10	0.292761	0.682	0.604	4.4e-06	0	EPB41L5	rods
RPS10-NUDT3	6e-10	0.292646	0.837	0.777	1.18e-05	0	RPS10-NUDT3	rods
CCDC110	3.8e-11	0.292599	0.558	0.444	7.44e-07	0	CCDC110	rods
ZNF589	4.13e-09	0.292165	0.54	0.45	8.1e-05	0	ZNF589	rods
EXTL3	4.82e-12	0.29202	0.916	0.897	9.46e-08	0	EXTL3	rods
PCBP2	6.3e-11	0.292	0.698	0.619	1.24e-06	0	PCBP2	rods
WSB1	1.06e-09	0.291693	0.623	0.516	2.09e-05	0	WSB1	rods
SFXN3	2.16e-08	0.29152	0.614	0.53	0.000422561	0	SFXN3	rods
SV2B	5.3e-11	0.291284	0.828	0.742	1.04e-06	0	SV2B	rods
CORO2B	3.93e-22	0.2912	0.975	0.975	7.7e-18	0	CORO2B	rods
TRIM37	6.6e-11	0.291187	0.693	0.603	1.29e-06	0	TRIM37	rods
SIRT3	4.68e-11	0.290949	0.605	0.511	9.18e-07	0	SIRT3	rods
MAPK11	1.29e-10	0.290531	0.623	0.513	2.54e-06	0	MAPK11	rods
PPEF2	1.21e-12	0.290503	0.404	0.264	2.38e-08	0	PPEF2	rods
AARS	4.03e-10	0.290232	0.628	0.531	7.91e-06	0	AARS	rods
WDR62	6.4e-09	0.290098	0.738	0.702	0.000125549	0	WDR62	rods
CDH16	1.22e-19	0.290035	0.316	0.144	2.39e-15	0	CDH16	rods
CHD7	4.6e-16	0.289966	0.986	0.954	9.02e-12	0	CHD7	rods
MRPL16	3.08e-13	0.289961	0.361	0.219	6.04e-09	0	MRPL16	rods
SEC62	3.41e-10	0.289947	0.605	0.503	6.69e-06	0	SEC62	rods
WBP11	4.47e-11	0.289565	0.659	0.546	8.76e-07	0	WBP11	rods
GABARAPL2	2.19e-11	0.289394	0.573	0.447	4.3e-07	0	GABARAPL2	rods
LOXL2	3.72e-09	0.28927	0.774	0.718	7.29e-05	0	LOXL2	rods
RP1-4G17.5	7.19e-09	0.289198	0.695	0.63	0.000141015	0	RP1-4G17.5	rods
LRIT1	3.03e-16	0.289106	0.388	0.22	5.93e-12	0	LRIT1	rods
ZCCHC14	2.86e-10	0.289043	0.786	0.721	5.61e-06	0	ZCCHC14	rods
ARHGAP29	1.34e-10	0.288987	0.79	0.702	2.62e-06	0	ARHGAP29	rods
KHSRP	5.57e-11	0.28828	0.777	0.722	1.09e-06	0	KHSRP	rods
TERT	8.83e-11	0.287983	0.451	0.317	1.73e-06	0	TERT	rods
UNC119	5.69e-10	0.287564	0.567	0.445	1.12e-05	0	UNC119	rods
RP11-315D16.2	8.07e-12	0.287378	0.808	0.73	1.58e-07	0	RP11-315D16.2	rods
USP36	1e-09	0.287045	0.727	0.669	1.96e-05	0	USP36	rods
COL4A3BP	7.93e-10	0.287021	0.756	0.679	1.55e-05	0	COL4A3BP	rods
AP1G1	8.31e-10	0.286318	0.582	0.481	1.63e-05	0	AP1G1	rods
DET1	4.24e-11	0.286243	0.551	0.42	8.32e-07	0	DET1	rods
NT5DC2	7.57e-12	0.286133	0.763	0.677	1.48e-07	0	NT5DC2	rods
CLDN5	2.59e-06	0.285957	0.409	0.331	0.0507648	0	CLDN5	rods
CD37	2.5e-14	0.285867	0.558	0.406	4.9e-10	0	CD37	rods
PLXDC1	3.92e-10	0.285717	0.822	0.742	7.68e-06	0	PLXDC1	rods
BMPR1A	1.48e-09	0.285682	0.835	0.801	2.9e-05	0	BMPR1A	rods
LBH	2.91e-12	0.285585	0.894	0.836	5.7e-08	0	LBH	rods
MSL2	1.24e-11	0.285563	0.828	0.773	2.42e-07	0	MSL2	rods
ZBTB4	6.46e-10	0.285498	0.847	0.809	1.27e-05	0	ZBTB4	rods
EML5	8.51e-09	0.285318	0.7	0.637	0.000166801	0	EML5	rods
CRY1	8.12e-09	0.285294	0.813	0.758	0.000159141	0	CRY1	rods
LGALS9	7.9e-19	0.284969	0.255	0.106	1.55e-14	0	LGALS9	rods
LCLAT1	2.17e-11	0.284622	0.641	0.532	4.26e-07	0	LCLAT1	rods
MAPRE1	3.9e-08	0.284521	0.591	0.517	0.000763969	0	MAPRE1	rods
ALG8	6.23e-10	0.2844	0.488	0.38	1.22e-05	0	ALG8	rods
SMC1A	1.88e-08	0.284383	0.634	0.563	0.00036852	0	SMC1A	rods
RP11-515E23.1	1.22e-13	0.284161	0.449	0.291	2.4e-09	0	RP11-515E23.1	rods
FEM1A	3.29e-13	0.283846	0.677	0.568	6.46e-09	0	FEM1A	rods
DOLPP1	2.08e-10	0.283653	0.704	0.613	4.08e-06	0	DOLPP1	rods
MPPED2	6.94e-17	0.283581	0.959	0.927	1.36e-12	0	MPPED2	rods
PHYHD1	5.23e-11	0.28351	0.508	0.38	1.02e-06	0	PHYHD1	rods
PRCC	9.77e-12	0.283424	0.851	0.803	1.92e-07	0	PRCC	rods
HNRNPD	2.66e-10	0.283393	0.731	0.666	5.22e-06	0	HNRNPD	rods
LYPD2	6.44e-16	0.283354	0.221	0.094	1.26e-11	0	LYPD2	rods
CLDN3	8.03e-12	0.282699	0.327	0.198	1.57e-07	0	CLDN3	rods
TOMM40	3.28e-10	0.282668	0.772	0.721	6.44e-06	0	TOMM40	rods
ETNK2	3.24e-11	0.282234	0.58	0.454	6.34e-07	0	ETNK2	rods
SEMA4B	3.85e-11	0.281959	0.871	0.831	7.55e-07	0	SEMA4B	rods
CHAF1A	7.81e-10	0.281946	0.643	0.569	1.53e-05	0	CHAF1A	rods
HCN2	2.89e-09	0.281888	0.688	0.588	5.66e-05	0	HCN2	rods
RSPH14	1.6e-11	0.281492	0.939	0.919	3.13e-07	0	RSPH14	rods
KCNF1	7.8e-10	0.281292	0.474	0.349	1.53e-05	0	KCNF1	rods
RANGAP1	1.72e-08	0.281261	0.659	0.587	0.000336478	0	RANGAP1	rods
LTBP1	1.87e-09	0.281199	0.844	0.794	3.66e-05	0	LTBP1	rods
AL021546.6	4.81e-10	0.281089	0.607	0.513	9.43e-06	0	AL021546.6	rods
KCNQ2	1.19e-10	0.28084	0.874	0.805	2.33e-06	0	KCNQ2	rods
TP53BP2	3.57e-10	0.280576	0.781	0.683	6.99e-06	0	TP53BP2	rods
RHPN1	1.61e-08	0.280435	0.67	0.586	0.000316233	0	RHPN1	rods
TMEM53	5.95e-11	0.280225	0.847	0.793	1.17e-06	0	TMEM53	rods
TBC1D17	1.2e-12	0.280161	0.847	0.802	2.35e-08	0	TBC1D17	rods
CASQ1	1.81e-10	0.279864	0.549	0.434	3.55e-06	0	CASQ1	rods
RP11-322E11.6	7.03e-09	0.279842	0.591	0.492	0.000137845	0	RP11-322E11.6	rods
CTDSP1	6.3e-12	0.2797	0.675	0.565	1.24e-07	0	CTDSP1	rods
PICALM	3.22e-10	0.279199	0.729	0.666	6.32e-06	0	PICALM	rods
FBXO24	2.59e-10	0.279186	0.79	0.724	5.07e-06	0	FBXO24	rods
GSK3A	9.35e-09	0.27913	0.763	0.69	0.000183246	0	GSK3A	rods
ANP32A	4.09e-14	0.279104	0.865	0.827	8.02e-10	0	ANP32A	rods
MN1	2.64e-11	0.27901	0.874	0.843	5.18e-07	0	MN1	rods
RAB14	9.32e-10	0.278542	0.648	0.536	1.83e-05	0	RAB14	rods
C20orf141	1.27e-17	0.278483	0.251	0.106	2.48e-13	0	C20orf141	rods
RB1CC1	1.32e-11	0.27803	0.716	0.604	2.59e-07	0	RB1CC1	rods
TLDC1	1.46e-10	0.277297	0.869	0.811	2.86e-06	0	TLDC1	rods
PPP3R1	5.86e-10	0.277257	0.815	0.741	1.15e-05	0	PPP3R1	rods
CRTC3	3.83e-11	0.276918	0.727	0.653	7.51e-07	0	CRTC3	rods
PRICKLE2	1.23e-14	0.276797	0.937	0.908	2.42e-10	0	PRICKLE2	rods
PODXL2	4.65e-10	0.276788	0.686	0.603	9.13e-06	0	PODXL2	rods
HPS4	8.3e-08	0.276721	0.637	0.572	0.00162686	0	HPS4	rods
TMEM132C	2.52e-11	0.27648	0.939	0.911	4.94e-07	0	TMEM132C	rods
MBD6	1.73e-13	0.276367	0.847	0.788	3.4e-09	0	MBD6	rods
MKNK2	2.2e-11	0.276351	0.765	0.668	4.32e-07	0	MKNK2	rods
KLF16	2.51e-11	0.276346	0.878	0.827	4.92e-07	0	KLF16	rods
ASXL2	3.13e-09	0.27634	0.698	0.642	6.14e-05	0	ASXL2	rods
PCSK4	3.98e-12	0.275602	0.799	0.712	7.8e-08	0	PCSK4	rods
RHBDL3	4.96e-13	0.275595	0.928	0.891	9.73e-09	0	RHBDL3	rods
IRX6	2.4e-08	0.275425	0.372	0.259	0.000470418	0	IRX6	rods
C2orf74	1.03e-09	0.275343	0.361	0.246	2.03e-05	0	C2orf74	rods
GNGT2	4.87e-18	0.275216	0.291	0.134	9.55e-14	0	GNGT2	rods
CTC-273B12.7	9.37e-12	0.275186	0.747	0.651	1.84e-07	0	CTC-273B12.7	rods
INHBB	1.17e-08	0.274451	0.517	0.404	0.000228581	0	INHBB	rods
THRAP3	2.11e-11	0.274418	0.799	0.731	4.14e-07	0	THRAP3	rods
EXOSC5	1.57e-11	0.274385	0.56	0.437	3.08e-07	0	EXOSC5	rods
MTMR3	2.03e-10	0.274341	0.745	0.663	3.98e-06	0	MTMR3	rods
TTLL3	9.03e-09	0.274204	0.716	0.661	0.000177124	0	TTLL3	rods
IQCK	2.42e-10	0.274051	0.772	0.656	4.75e-06	0	IQCK	rods
RPN1	1.63e-09	0.273919	0.758	0.706	3.2e-05	0	RPN1	rods
KAT5	1.65e-09	0.273898	0.612	0.523	3.24e-05	0	KAT5	rods
SOD2	4.52e-12	0.273539	0.907	0.885	8.85e-08	0	SOD2	rods
ABCA7	7.48e-10	0.273468	0.695	0.621	1.47e-05	0	ABCA7	rods
ICA1L	2e-08	0.273157	0.576	0.481	0.00039186	0	ICA1L	rods
GRAMD1B	2.34e-16	0.272902	0.966	0.959	4.58e-12	0	GRAMD1B	rods
DDHD2	8.96e-11	0.272901	0.824	0.75	1.76e-06	0	DDHD2	rods
DICER1	2.64e-09	0.272871	0.713	0.636	5.17e-05	0	DICER1	rods
PCMTD2	1.11e-07	0.272662	0.51	0.432	0.00218546	0	PCMTD2	rods
FBXO31.1	3.57e-12	0.272629	0.289	0.16	7e-08	0	FBXO31.1	rods
POU2F1	1.69e-13	0.272378	0.912	0.89	3.31e-09	0	POU2F1	rods
CEP170B	1.38e-08	0.272232	0.594	0.5	0.000270575	0	CEP170B	rods
MFSD3	1.36e-08	0.272071	0.553	0.466	0.000267044	0	MFSD3	rods
CSNK1E	2e-09	0.272049	0.885	0.839	3.92e-05	0	CSNK1E	rods
CDC27	4.35e-10	0.271941	0.673	0.572	8.52e-06	0	CDC27	rods
BRD4	2.4e-09	0.271538	0.883	0.857	4.71e-05	0	BRD4	rods
DHRS12	3.2e-09	0.271529	0.74	0.672	6.27e-05	0	DHRS12	rods
ATP1B2	5.9e-09	0.271216	0.7	0.608	0.000115597	0	ATP1B2	rods
DISP3	6e-09	0.271164	0.783	0.73	0.000117736	0	DISP3	rods
ST6GALNAC2	1.5e-10	0.2711	0.596	0.486	2.95e-06	0	ST6GALNAC2	rods
PGRMC2	8.11e-09	0.271054	0.767	0.698	0.000158985	0	PGRMC2	rods
HEXIM2	1.78e-09	0.270688	0.655	0.56	3.49e-05	0	HEXIM2	rods
HARBI1	4.54e-10	0.270656	0.533	0.42	8.91e-06	0	HARBI1	rods
CCL26	1.8e-12	0.270594	0.451	0.296	3.54e-08	0	CCL26	rods
POLR2A	8.38e-10	0.270324	0.77	0.718	1.64e-05	0	POLR2A	rods
DDX19B	3.87e-10	0.270303	0.686	0.599	7.58e-06	0	DDX19B	rods
ATP5G1	8.71e-10	0.270058	0.686	0.609	1.71e-05	0	ATP5G1	rods
USP7	1.28e-06	0.270032	0.7	0.664	0.025048	0	USP7	rods
NFAT5	1.67e-09	0.269999	0.7	0.609	3.27e-05	0	NFAT5	rods
YY1	2.77e-10	0.269806	0.828	0.781	5.43e-06	0	YY1	rods
KLHDC4	4.19e-10	0.269648	0.688	0.585	8.21e-06	0	KLHDC4	rods
RPL13	1.73e-07	0.269505	0.58	0.514	0.00340123	0	RPL13	rods
MIOS	2.25e-08	0.269261	0.544	0.459	0.000440431	0	MIOS	rods
WDFY3	3.88e-08	0.268821	0.822	0.797	0.00076138	0	WDFY3	rods
GOLGA7	1.53e-10	0.268779	0.549	0.433	3.01e-06	0	GOLGA7	rods
REEP3	2.12e-09	0.268775	0.727	0.661	4.15e-05	0	REEP3	rods
DHX9	5.7e-09	0.268438	0.682	0.626	0.000111735	0	DHX9	rods
RP5-860F19.8	2.21e-15	0.268306	0.255	0.118	4.34e-11	0	RP5-860F19.8	rods
AC002310.11	4.47e-09	0.268068	0.786	0.73	8.77e-05	0	AC002310.11	rods
PLEKHA7	2.31e-13	0.26804	0.955	0.956	4.52e-09	0	PLEKHA7	rods
SEC14L2	5.09e-11	0.267869	0.716	0.645	9.98e-07	0	SEC14L2	rods
FBXO22	3.12e-08	0.267826	0.501	0.408	0.000611862	0	FBXO22	rods
ZNF83	4.85e-10	0.267443	0.797	0.721	9.51e-06	0	ZNF83	rods
SLC25A38	6.83e-10	0.267182	0.612	0.509	1.34e-05	0	SLC25A38	rods
TMA7	9.21e-12	0.266989	0.526	0.376	1.81e-07	0	TMA7	rods
PLEKHH1	6.76e-11	0.26687	0.652	0.54	1.33e-06	0	PLEKHH1	rods
KRI1	6.38e-10	0.266723	0.53	0.429	1.25e-05	0	KRI1	rods
WBP1L	8.75e-10	0.266606	0.72	0.647	1.72e-05	0	WBP1L	rods
NPHS1	3.14e-08	0.266199	0.808	0.771	0.00061575	0	NPHS1	rods
FAM107A	4.56e-10	0.266093	0.67	0.569	8.95e-06	0	FAM107A	rods
ATP6V1D	6.74e-10	0.265914	0.657	0.547	1.32e-05	0	ATP6V1D	rods
LDHA	4.95e-09	0.26587	0.677	0.598	9.71e-05	0	LDHA	rods
CRABP2	2.71e-07	0.265721	0.499	0.408	0.00531728	0	CRABP2	rods
LYST	9.57e-09	0.265685	0.772	0.729	0.000187567	0	LYST	rods
USP53	3.04e-09	0.26563	0.643	0.545	5.97e-05	0	USP53	rods
ANKRD12	2.53e-09	0.265545	0.84	0.775	4.96e-05	0	ANKRD12	rods
INTS3	0.00584425	0.265504	0.609	0.583	1	0	INTS3	rods
HK1	2.76e-09	0.265411	0.86	0.802	5.41e-05	0	HK1	rods
TMX4	3.27e-09	0.265381	0.659	0.586	6.41e-05	0	TMX4	rods
ZNF146	7.44e-08	0.265199	0.63	0.588	0.00145952	0	ZNF146	rods
PPP4R3A	1.12e-09	0.265036	0.722	0.663	2.19e-05	0	PPP4R3A	rods
CCT5	1.45e-08	0.265036	0.639	0.558	0.000284676	0	CCT5	rods
ZNF565	1.54e-07	0.264941	0.72	0.698	0.00301456	0	ZNF565	rods
CDC42	1e-10	0.264699	0.621	0.509	1.96e-06	0	CDC42	rods
PUM2	1.04e-09	0.264675	0.765	0.686	2.05e-05	0	PUM2	rods
STARD10	2.41e-08	0.264595	0.774	0.701	0.000472299	0	STARD10	rods
CEP55	7.58e-07	0.264488	0.53	0.457	0.014864	0	CEP55	rods
SUPT4H1	6.33e-10	0.264248	0.508	0.403	1.24e-05	0	SUPT4H1	rods
PRKAA2	1.89e-06	0.264227	0.479	0.397	0.0370609	0	PRKAA2	rods
ACVR2B	4.16e-09	0.264009	0.74	0.667	8.16e-05	0	ACVR2B	rods
CDH26	3.09e-09	0.263975	0.494	0.382	6.05e-05	0	CDH26	rods
RBM39	2.35e-07	0.263917	0.72	0.692	0.00461238	0	RBM39	rods
ANKAR	1.12e-07	0.263705	0.499	0.411	0.00219449	0	ANKAR	rods
SLC25A33	1.41e-09	0.263574	0.666	0.568	2.76e-05	0	SLC25A33	rods
ISCA2	2.31e-11	0.263325	0.693	0.585	4.52e-07	0	ISCA2	rods
SRXN1	6.91e-08	0.263171	0.483	0.384	0.00135481	0	SRXN1	rods
ING5	1.04e-10	0.263092	0.874	0.818	2.03e-06	0	ING5	rods
UBE2C	7.21e-10	0.263002	0.512	0.398	1.41e-05	0	UBE2C	rods
CCDC155	3.08e-07	0.262971	0.619	0.526	0.0060448	0	CCDC155	rods
TADA2B	1.39e-07	0.262751	0.74	0.695	0.00272249	0	TADA2B	rods
DDX31	4.98e-11	0.262697	0.756	0.644	9.76e-07	0	DDX31	rods
SON	6.01e-08	0.262537	0.711	0.649	0.00117773	0	SON	rods
MSH5	3.6e-09	0.262475	0.526	0.43	7.05e-05	0	MSH5	rods
AP3B2	1.89e-08	0.26232	0.625	0.545	0.000370679	0	AP3B2	rods
AKT1S1	1e-12	0.26223	0.894	0.881	1.96e-08	0	AKT1S1	rods
ACSL1	4.8e-10	0.262089	0.738	0.667	9.41e-06	0	ACSL1	rods
JADE2	2.31e-08	0.262042	0.781	0.738	0.000452116	0	JADE2	rods
COPS3	1.58e-09	0.262	0.63	0.537	3.09e-05	0	COPS3	rods
KDM1B	5.31e-11	0.261936	0.756	0.673	1.04e-06	0	KDM1B	rods
ZFAND6	5.63e-09	0.261899	0.781	0.726	0.000110438	0	ZFAND6	rods
PRR36	1.44e-07	0.261782	0.691	0.644	0.00281862	0	PRR36	rods
AKAP9	1.13e-08	0.261683	0.639	0.553	0.000221152	0	AKAP9	rods
CYLD	2.53e-10	0.261641	0.652	0.556	4.97e-06	0	CYLD	rods
LMNB2	2.95e-08	0.261592	0.682	0.64	0.000578191	0	LMNB2	rods
INIP	5.92e-08	0.261262	0.551	0.469	0.0011611	0	INIP	rods
C17orf58	8.97e-08	0.261137	0.619	0.541	0.00175785	0	C17orf58	rods
CDKL2	2.39e-08	0.26095	0.46	0.356	0.000468437	0	CDKL2	rods
FA2H	1.19e-07	0.26074	0.679	0.609	0.00233756	0	FA2H	rods
EMC2	7.69e-09	0.260547	0.609	0.531	0.000150738	0	EMC2	rods
SMTNL1	1.51e-15	0.260485	0.273	0.13	2.97e-11	0	SMTNL1	rods
RABL3	1.66e-07	0.260337	0.65	0.577	0.00325447	0	RABL3	rods
BCL2L11	2.11e-09	0.260252	0.79	0.76	4.14e-05	0	BCL2L11	rods
TTBK2	8.26e-11	0.260214	0.734	0.648	1.62e-06	0	TTBK2	rods
TCOF1	3.45e-11	0.260023	0.578	0.454	6.76e-07	0	TCOF1	rods
CENPT	2.91e-10	0.260006	0.844	0.802	5.7e-06	0	CENPT	rods
STRADA	4.51e-07	0.259922	0.546	0.46	0.00884539	0	STRADA	rods
UBR2	1.09e-09	0.25984	0.657	0.557	2.14e-05	0	UBR2	rods
FLVCR1	8.82e-09	0.259679	0.682	0.629	0.000173024	0	FLVCR1	rods
TMX3	1.7e-06	0.259595	0.479	0.409	0.0334065	0	TMX3	rods
CEP192	4.62e-10	0.259324	0.727	0.642	9.06e-06	0	CEP192	rods
C2CD2	7.39e-09	0.259187	0.614	0.526	0.000144869	0	C2CD2	rods
SMAD2	3.95e-12	0.259085	0.889	0.852	7.75e-08	0	SMAD2	rods
H3F3B	2.29e-09	0.258999	0.792	0.75	4.5e-05	0	H3F3B	rods
DFFB	3.21e-08	0.25894	0.542	0.45	0.000629931	0	DFFB	rods
MTMR9	1.9e-07	0.258779	0.576	0.494	0.00373055	0	MTMR9	rods
RP11-77K12.1	8.5e-08	0.258711	0.788	0.768	0.00166646	0	RP11-77K12.1	rods
METAP1	1.42e-08	0.258441	0.731	0.662	0.000277859	0	METAP1	rods
OXSR1	1.38e-08	0.258268	0.713	0.67	0.00027044	0	OXSR1	rods
IPO13	1.43e-10	0.258164	0.682	0.568	2.8e-06	0	IPO13	rods
KCNK3	1.5e-08	0.258096	0.828	0.762	0.000294589	0	KCNK3	rods
KCNB2	7.51e-09	0.25808	0.867	0.828	0.000147166	0	KCNB2	rods
TMEM204	1.87e-07	0.257955	0.397	0.295	0.00366036	0	TMEM204	rods
CYHR1	4.87e-10	0.25795	0.754	0.698	9.55e-06	0	CYHR1	rods
IZUMO4	7.95e-08	0.25778	0.684	0.608	0.00155784	0	IZUMO4	rods
GNL2	1.28e-07	0.257529	0.429	0.35	0.00251681	0	GNL2	rods
RP11-552F3.12	5.12e-07	0.257459	0.571	0.511	0.0100414	0	RP11-552F3.12	rods
ASPHD1	4.24e-08	0.257373	0.623	0.549	0.000831024	0	ASPHD1	rods
NPC2	7.69e-11	0.257284	0.716	0.622	1.51e-06	0	NPC2	rods
MFSD11	6.67e-09	0.257251	0.783	0.725	0.000130691	0	MFSD11	rods
ZBTB44	9.7e-10	0.257166	0.682	0.586	1.9e-05	0	ZBTB44	rods
AHI1	3.48e-09	0.257061	0.738	0.668	6.83e-05	0	AHI1	rods
PQLC3	1.11e-08	0.256874	0.628	0.524	0.000217196	0	PQLC3	rods
AAK1	6.37e-08	0.256777	0.763	0.745	0.00124837	0	AAK1	rods
OAZ2	2.16e-09	0.256631	0.623	0.514	4.24e-05	0	OAZ2	rods
SLC16A1	8.73e-08	0.256444	0.691	0.654	0.00171176	0	SLC16A1	rods
KIAA1958	1.39e-07	0.256407	0.792	0.756	0.00272587	0	KIAA1958	rods
ARHGAP8	1.5e-08	0.256252	0.659	0.558	0.000293366	0	ARHGAP8	rods
EIF1	2.14e-08	0.256186	0.731	0.676	0.000419622	0	EIF1	rods
PAFAH1B1	9.32e-10	0.256126	0.781	0.71	1.83e-05	0	PAFAH1B1	rods
CEP85	4.05e-11	0.256073	0.677	0.591	7.95e-07	0	CEP85	rods
PDXDC1	8.22e-11	0.256014	0.869	0.827	1.61e-06	0	PDXDC1	rods
RRAD	3.88e-10	0.255955	0.323	0.201	7.61e-06	0	RRAD	rods
HSF1	3.85e-09	0.255846	0.698	0.614	7.54e-05	0	HSF1	rods
MTFP1	2.75e-08	0.255721	0.65	0.581	0.000539981	0	MTFP1	rods
PSME1	1.95e-09	0.255659	0.542	0.433	3.82e-05	0	PSME1	rods
POLR1D	1.58e-09	0.255568	0.74	0.656	3.1e-05	0	POLR1D	rods
ZEB1	1.76e-09	0.255556	0.772	0.69	3.44e-05	0	ZEB1	rods
WWC1	3.18e-11	0.255538	0.892	0.831	6.24e-07	0	WWC1	rods
KLHDC8A	2.73e-09	0.255272	0.725	0.621	5.35e-05	0	KLHDC8A	rods
HNRNPF	1.23e-10	0.254873	0.84	0.807	2.41e-06	0	HNRNPF	rods
IFT140	2.7e-09	0.254865	0.799	0.761	5.3e-05	0	IFT140	rods
PIP4K2A	1.4e-07	0.254489	0.84	0.825	0.00274007	0	PIP4K2A	rods
IGDCC4	1.09e-08	0.254456	0.847	0.816	0.000213627	0	IGDCC4	rods
RP11-977G19.10	2.21e-09	0.254437	0.772	0.712	4.33e-05	0	RP11-977G19.10	rods
ANKRD53	1.97e-08	0.254369	0.65	0.554	0.000386289	0	ANKRD53	rods
FAM78B	3.69e-08	0.254331	0.646	0.543	0.000724419	0	FAM78B	rods
RASD1	2.14e-09	0.254153	0.628	0.529	4.2e-05	0	RASD1	rods
LETM1	3.39e-07	0.25409	0.603	0.543	0.00664811	0	LETM1	rods
ALS2	3.24e-09	0.253787	0.632	0.535	6.35e-05	0	ALS2	rods
SLC35F2	1.22e-09	0.25377	0.788	0.701	2.39e-05	0	SLC35F2	rods
RP11-51F16.8	1.22e-06	0.253657	0.549	0.468	0.0239228	0	RP11-51F16.8	rods
HPS5	9.77e-08	0.253638	0.591	0.521	0.00191522	0	HPS5	rods
UBN1	2.18e-09	0.253506	0.619	0.522	4.27e-05	0	UBN1	rods
CCDC192	2.48e-07	0.253501	0.736	0.685	0.00486895	0	CCDC192	rods
KIF15	6.78e-08	0.253373	0.698	0.631	0.00132986	0	KIF15	rods
BOD1	1.27e-07	0.253304	0.53	0.438	0.00248892	0	BOD1	rods
ZBTB21	2.6e-07	0.252869	0.7	0.663	0.00509555	0	ZBTB21	rods
CNOT6	7.08e-09	0.25261	0.628	0.552	0.000138894	0	CNOT6	rods
CERS4	6.15e-08	0.252501	0.74	0.683	0.00120621	0	CERS4	rods
TSPAN9	4.9e-13	0.252469	0.986	0.966	9.61e-09	0	TSPAN9	rods
DUSP2	9.71e-11	0.252448	0.381	0.251	1.9e-06	0	DUSP2	rods
OBSCN	2.61e-07	0.252351	0.876	0.828	0.00511263	0	OBSCN	rods
TLK1	1.44e-07	0.252242	0.799	0.762	0.00282913	0	TLK1	rods
LMF2	1.85e-08	0.251998	0.594	0.505	0.000363501	0	LMF2	rods
IMPG2	1.19e-09	0.251944	0.409	0.282	2.34e-05	0	IMPG2	rods
TBC1D10B	4.7e-10	0.251924	0.828	0.769	9.22e-06	0	TBC1D10B	rods
HEBP2	1.93e-07	0.251832	0.578	0.496	0.00378101	0	HEBP2	rods
NCAPH2	1.24e-08	0.251749	0.607	0.52	0.000243368	0	NCAPH2	rods
RNF121	8.12e-07	0.25154	0.585	0.517	0.0159191	0	RNF121	rods
PIAS4	7.63e-08	0.251513	0.666	0.586	0.00149521	0	PIAS4	rods
NUBP2	9.06e-09	0.251425	0.695	0.626	0.000177599	0	NUBP2	rods
ZNF44	1.03e-06	0.251241	0.528	0.46	0.0201622	0	ZNF44	rods
AXIN1	3.05e-10	0.251215	0.745	0.659	5.97e-06	0	AXIN1	rods
MYT1	3.25e-10	0.251211	0.887	0.81	6.38e-06	0	MYT1	rods
IL17B	1.28e-06	0.251038	0.37	0.286	0.0251813	0	IL17B	rods
EIF3L	2.32e-07	0.251017	0.454	0.362	0.00455632	0	EIF3L	rods
MCC	7.53e-12	0.251004	0.973	0.954	1.48e-07	0	MCC	rods
PCDHA11	3.47e-08	0.250918	0.774	0.699	0.000680796	0	PCDHA11	rods
CD3EAP	4.23e-08	0.250916	0.53	0.424	0.000829475	0	CD3EAP	rods
JMY	2.6e-06	0.250915	0.666	0.619	0.0510751	0	JMY	rods
TADA2A	1.51e-10	0.250784	0.589	0.466	2.96e-06	0	TADA2A	rods
OGFOD1	3.3e-09	0.250716	0.648	0.549	6.47e-05	0	OGFOD1	rods
DMXL2	1.05e-06	0.250549	0.679	0.609	0.0205844	0	DMXL2	rods
GSPT1	1.57e-09	0.250469	0.648	0.541	3.08e-05	0	GSPT1	rods
GLP2R	1.83e-11	0.250379	0.298	0.174	3.59e-07	0	GLP2R	rods
ZNF768	7.98e-08	0.250168	0.675	0.613	0.00156386	0	ZNF768	rods
TFCP2	3.27e-08	0.250155	0.564	0.473	0.000640969	0	TFCP2	rods
SH3BP4	1.67e-09	0.250086	0.948	0.923	3.28e-05	0	SH3BP4	rods
TRAK2	1.77e-07	0.250027	0.786	0.729	0.00347035	0	TRAK2	rods
RASSF10	3.36e-12	-0.250209	0.093	0.246	6.59e-08	0	RASSF10	rods
ANGPTL5	5.36e-08	-0.250332	0.402	0.546	0.00105153	0	ANGPTL5	rods
HK3	4.35e-13	-0.250464	0.043	0.179	8.53e-09	0	HK3	rods
GPR139	5.03e-12	-0.250624	0.077	0.222	9.87e-08	0	GPR139	rods
LTF	2.33e-12	-0.250753	0.05	0.185	4.57e-08	0	LTF	rods
SPATA6L	3.74e-07	-0.250839	0.402	0.545	0.00733819	0	SPATA6L	rods
RAB36	1.5e-10	-0.250941	0.271	0.448	2.94e-06	0	RAB36	rods
GAS8.1	2.5e-13	-0.251025	0.036	0.171	4.9e-09	0	GAS8.1	rods
RGS3	1.38e-08	-0.251145	0.783	0.875	0.00027051	0	RGS3	rods
CDH1	1.01e-11	-0.251361	0.135	0.298	1.97e-07	0	CDH1	rods
B3GNT2	1.33e-12	-0.251449	0.183	0.377	2.6e-08	0	B3GNT2	rods
ITGAV	4.08e-08	-0.251449	0.467	0.618	0.000800007	0	ITGAV	rods
WIF1	1.77e-11	-0.251546	0.117	0.272	3.48e-07	0	WIF1	rods
C10orf54	1.96e-11	-0.251602	0.187	0.368	3.84e-07	0	C10orf54	rods
HIST1H2BK	7.44e-14	-0.251818	0.099	0.273	1.46e-09	0	HIST1H2BK	rods
SLC35D2	6.93e-07	-0.251838	0.361	0.491	0.0135921	0	SLC35D2	rods
PCDH8	2.32e-07	-0.251858	0.381	0.522	0.00454573	0	PCDH8	rods
TMEM163	3.16e-06	-0.25186	0.607	0.701	0.061939	0	TMEM163	rods
PNPLA7	4.42e-08	-0.251941	0.564	0.7	0.000866527	0	PNPLA7	rods
MYPN	8.61e-10	-0.252256	0.196	0.35	1.69e-05	0	MYPN	rods
TACR3	2.06e-11	-0.252418	0.122	0.279	4.03e-07	0	TACR3	rods
DNAH17	1.05e-09	-0.252565	0.377	0.563	2.06e-05	0	DNAH17	rods
HIST1H2BJ	1.76e-09	-0.252688	0.332	0.493	3.46e-05	0	HIST1H2BJ	rods
SORBS2	5.37e-08	-0.252697	0.869	0.921	0.00105358	0	SORBS2	rods
MAP1B	1.06e-06	-0.252716	0.819	0.892	0.0207291	0	MAP1B	rods
CAPN2	1.97e-06	-0.252768	0.54	0.655	0.0386868	0	CAPN2	rods
ARHGEF1	6.43e-07	-0.253026	0.492	0.623	0.0126148	0	ARHGEF1	rods
ATF6	6.3e-07	-0.253028	0.336	0.474	0.0123557	0	ATF6	rods
MYC	7.8e-09	-0.25325	0.336	0.5	0.00015302	0	MYC	rods
WDR72	2.98e-09	-0.253372	0.551	0.7	5.85e-05	0	WDR72	rods
PSAT1	2.02e-16	-0.253387	0.192	0.414	3.97e-12	0	PSAT1	rods
CAMKMT	1.85e-10	-0.253504	0.894	0.943	3.63e-06	0	CAMKMT	rods
DDX60	1.82e-10	-0.25353	0.129	0.276	3.56e-06	0	DDX60	rods
TMEM247	2.39e-08	-0.253545	0.228	0.367	0.000469007	0	TMEM247	rods
TEAD2	3.47e-11	-0.253775	0.251	0.438	6.8e-07	0	TEAD2	rods
SPRY4	3.28e-08	-0.25422	0.433	0.585	0.000643424	0	SPRY4	rods
NEFL	6.26e-16	-0.254601	0.056	0.23	1.23e-11	0	NEFL	rods
COL6A5	3.04e-15	-0.254647	0.054	0.221	5.95e-11	0	COL6A5	rods
SDK2	3.01e-15	-0.254657	0.984	0.993	5.9e-11	0	SDK2	rods
HERC2	3.84e-09	-0.25466	0.305	0.473	7.53e-05	0	HERC2	rods
FAM107B	1.06e-08	-0.254663	0.727	0.815	0.00020813	0	FAM107B	rods
MAP3K8	2.92e-07	-0.254682	0.391	0.524	0.00571687	0	MAP3K8	rods
NCS1	1.46e-09	-0.254695	0.661	0.804	2.85e-05	0	NCS1	rods
COBL	8.85e-06	-0.254767	0.795	0.879	0.173429	0	COBL	rods
PAX3	5.92e-09	-0.254815	0.46	0.616	0.000116032	0	PAX3	rods
SHD	4.67e-10	-0.254986	0.228	0.392	9.16e-06	0	SHD	rods
TMC2	2.7e-12	-0.255022	0.108	0.266	5.29e-08	0	TMC2	rods
STAU2	2.74e-09	-0.255061	0.819	0.881	5.37e-05	0	STAU2	rods
ELOVL6	2.83e-08	-0.255084	0.639	0.777	0.000554278	0	ELOVL6	rods
MX1	2.81e-12	-0.255144	0.122	0.292	5.51e-08	0	MX1	rods
TSHZ1	9.26e-10	-0.255324	0.589	0.749	1.82e-05	0	TSHZ1	rods
PDZRN3	1.11e-08	-0.255369	0.849	0.92	0.000216728	0	PDZRN3	rods
POU2AF1	4.87e-09	-0.255721	0.221	0.368	9.54e-05	0	POU2AF1	rods
JPH2	3.63e-12	-0.25573	0.201	0.387	7.11e-08	0	JPH2	rods
THBS3	2.58e-07	-0.25585	0.479	0.619	0.00506255	0	THBS3	rods
CALY	7.86e-09	-0.255857	0.379	0.549	0.000154097	0	CALY	rods
CR1	4.67e-12	-0.256042	0.122	0.283	9.17e-08	0	CR1	rods
PLEKHG5	9.06e-09	-0.256082	0.6	0.739	0.000177648	0	PLEKHG5	rods
TMPRSS15	8.29e-15	-0.256408	0.077	0.25	1.62e-10	0	TMPRSS15	rods
OTOGL	5.25e-13	-0.256852	0.115	0.286	1.03e-08	0	OTOGL	rods
CACNB4	2.04e-08	-0.25726	0.594	0.721	0.000400724	0	CACNB4	rods
MYRF	1.03e-10	-0.257433	0.422	0.599	2.02e-06	0	MYRF	rods
PARP8	6.8e-09	-0.257582	0.334	0.497	0.00013329	0	PARP8	rods
SLC16A12	1.49e-10	-0.257686	0.176	0.341	2.93e-06	0	SLC16A12	rods
DNAJC24	9.01e-10	-0.257859	0.291	0.459	1.77e-05	0	DNAJC24	rods
CTD-2349B8.1	1.81e-08	-0.257982	0.235	0.387	0.00035489	0	CTD-2349B8.1	rods
ABCC3	4.86e-08	-0.258047	0.312	0.457	0.000952287	0	ABCC3	rods
MAGED1	4.36e-09	-0.258093	0.451	0.606	8.56e-05	0	MAGED1	rods
SYT10	6.56e-15	-0.258119	0.068	0.237	1.29e-10	0	SYT10	rods
SLC25A48	3.83e-09	-0.258162	0.203	0.35	7.51e-05	0	SLC25A48	rods
CELF5	1.39e-07	-0.258279	0.53	0.667	0.00273362	0	CELF5	rods
TCF12	1.8e-09	-0.258306	0.887	0.938	3.53e-05	0	TCF12	rods
RAMP1	1.11e-08	-0.258386	0.345	0.512	0.000217176	0	RAMP1	rods
TRDMT1	4.38e-08	-0.258408	0.451	0.598	0.00085907	0	TRDMT1	rods
PLAC1	7.56e-14	-0.258696	0.16	0.351	1.48e-09	0	PLAC1	rods
TMIE	2e-12	-0.258979	0.153	0.328	3.93e-08	0	TMIE	rods
SLN	7.53e-13	-0.259009	0.054	0.195	1.48e-08	0	SLN	rods
CHRND	1.83e-09	-0.259151	0.205	0.356	3.58e-05	0	CHRND	rods
EHD4	2.95e-08	-0.259232	0.591	0.719	0.000577438	0	EHD4	rods
ST8SIA3	9.55e-10	-0.259382	0.212	0.366	1.87e-05	0	ST8SIA3	rods
EDNRA	1.04e-15	-0.259392	0.068	0.244	2.05e-11	0	EDNRA	rods
ADRA1A	1.02e-09	-0.259827	0.357	0.546	2.01e-05	0	ADRA1A	rods
ABCC12	3.22e-12	-0.259837	0.131	0.297	6.32e-08	0	ABCC12	rods
FANK1	9.53e-09	-0.259837	0.366	0.532	0.00018682	0	FANK1	rods
PLA2G7	3.75e-12	-0.259862	0.113	0.276	7.35e-08	0	PLA2G7	rods
BFSP2	6.42e-09	-0.26006	0.345	0.504	0.000125819	0	BFSP2	rods
AKNAD1	9.95e-11	-0.2601	0.113	0.259	1.95e-06	0	AKNAD1	rods
DIO3	7.24e-10	-0.260111	0.14	0.284	1.42e-05	0	DIO3	rods
ALDH1A3	5.63e-10	-0.260312	0.203	0.365	1.1e-05	0	ALDH1A3	rods
VRK2	2.62e-08	-0.26032	0.339	0.494	0.000513635	0	VRK2	rods
TMPRSS4-AS1	2.88e-08	-0.260374	0.255	0.406	0.00056478	0	TMPRSS4-AS1	rods
PGAM2	2.06e-13	-0.260905	0.104	0.273	4.04e-09	0	PGAM2	rods
NHSL2	1.84e-08	-0.260966	0.761	0.838	0.00036053	0	NHSL2	rods
LASP1	1.35e-08	-0.26097	0.695	0.811	0.00026472	0	LASP1	rods
SMARCE1	3.75e-09	-0.261114	0.341	0.493	7.36e-05	0	SMARCE1	rods
C8orf46	6.27e-07	-0.261246	0.508	0.646	0.0122851	0	C8orf46	rods
KCNJ10	3.42e-08	-0.261294	0.657	0.762	0.000670263	0	KCNJ10	rods
TMEM114	2.96e-10	-0.261376	0.187	0.348	5.81e-06	0	TMEM114	rods
LINC00672	3.18e-14	-0.261601	0.054	0.206	6.23e-10	0	LINC00672	rods
ZIC1	3.67e-07	-0.261966	0.704	0.811	0.0072021	0	ZIC1	rods
IL1RAP	1.93e-08	-0.262046	0.35	0.508	0.000379336	0	IL1RAP	rods
GREM2	1.02e-11	-0.262085	0.194	0.374	1.99e-07	0	GREM2	rods
SLC16A7	2.84e-07	-0.262192	0.472	0.604	0.00556482	0	SLC16A7	rods
KIAA1024	3.78e-11	-0.262194	0.199	0.372	7.42e-07	0	KIAA1024	rods
HNF4G	2.03e-14	-0.262256	0.138	0.333	3.97e-10	0	HNF4G	rods
COL4A2	4.8e-10	-0.262383	0.86	0.905	9.42e-06	0	COL4A2	rods
PIK3C2G	1.15e-08	-0.262585	0.393	0.542	0.000226413	0	PIK3C2G	rods
ABI3BP	7.4e-13	-0.262588	0.201	0.391	1.45e-08	0	ABI3BP	rods
ATP2B4	1.95e-09	-0.262683	0.684	0.808	3.82e-05	0	ATP2B4	rods
BCAS4	1.35e-09	-0.262716	0.411	0.59	2.64e-05	0	BCAS4	rods
VWA5B1	8.4e-08	-0.262725	0.587	0.701	0.00164641	0	VWA5B1	rods
KLF7	1.06e-09	-0.262802	0.844	0.897	2.09e-05	0	KLF7	rods
GPR55	1.27e-12	-0.262917	0.133	0.305	2.49e-08	0	GPR55	rods
TRPM2	1.56e-10	-0.263087	0.271	0.449	3.06e-06	0	TRPM2	rods
SRCIN1	7.69e-09	-0.263097	0.799	0.864	0.000150772	0	SRCIN1	rods
NEK7	8.11e-08	-0.263235	0.747	0.831	0.00158975	0	NEK7	rods
TSPAN31	4.87e-09	-0.263287	0.429	0.583	9.55e-05	0	TSPAN31	rods
TTN	2.6e-11	-0.263425	0.235	0.423	5.1e-07	0	TTN	rods
CSNK1G3	5.68e-10	-0.263439	0.366	0.542	1.11e-05	0	CSNK1G3	rods
FGD5	4.8e-10	-0.26372	0.314	0.484	9.42e-06	0	FGD5	rods
MOCOS	2.45e-08	-0.263917	0.226	0.367	0.000480771	0	MOCOS	rods
LAMC2	1.97e-12	-0.263943	0.129	0.304	3.86e-08	0	LAMC2	rods
LMO2	1.81e-10	-0.263991	0.271	0.448	3.55e-06	0	LMO2	rods
HHIPL1	8.17e-09	-0.264273	0.318	0.469	0.000160127	0	HHIPL1	rods
CD226	5.46e-15	-0.26428	0.068	0.234	1.07e-10	0	CD226	rods
ATG9B	2.34e-10	-0.264395	0.316	0.505	4.59e-06	0	ATG9B	rods
ATP8B1	9.6e-11	-0.264505	0.242	0.419	1.88e-06	0	ATP8B1	rods
LMO3	1.14e-08	-0.264695	0.33	0.49	0.000223123	0	LMO3	rods
SOX9	8.68e-11	-0.264829	0.307	0.497	1.7e-06	0	SOX9	rods
SCD	4.11e-12	-0.264896	0.302	0.505	8.06e-08	0	SCD	rods
SPRED1	2.28e-10	-0.264935	0.494	0.657	4.47e-06	0	SPRED1	rods
DOK7	4.29e-07	-0.265052	0.573	0.692	0.00841636	0	DOK7	rods
RSPO4	1.94e-13	-0.265239	0.061	0.21	3.8e-09	0	RSPO4	rods
S100A11	1.05e-13	-0.265345	0.081	0.241	2.06e-09	0	S100A11	rods
ERGIC1	2.1e-11	-0.265523	0.7	0.82	4.13e-07	0	ERGIC1	rods
TSPAN12	2.26e-08	-0.26555	0.271	0.414	0.00044218	0	TSPAN12	rods
RECK	3.47e-10	-0.265565	0.298	0.471	6.81e-06	0	RECK	rods
ADGRF1	1.89e-16	-0.265615	0.018	0.169	3.7e-12	0	ADGRF1	rods
KCTD14	5.36e-11	-0.266081	0.262	0.443	1.05e-06	0	KCTD14	rods
ARHGAP40	1.7e-12	-0.26627	0.212	0.403	3.34e-08	0	ARHGAP40	rods
LINC00961	2.89e-13	-0.266348	0.113	0.282	5.66e-09	0	LINC00961	rods
CTD-2501B8.1	7.03e-11	-0.266361	0.19	0.356	1.38e-06	0	CTD-2501B8.1	rods
MSRB3	5.67e-13	-0.266389	0.289	0.496	1.11e-08	0	MSRB3	rods
SIM2	2.23e-08	-0.266392	0.449	0.589	0.000437401	0	SIM2	rods
TOX3	8.25e-09	-0.266463	0.648	0.762	0.000161665	0	TOX3	rods
SMARCD3	4.71e-09	-0.266519	0.616	0.748	9.24e-05	0	SMARCD3	rods
CPSF4L	7.99e-06	-0.266577	0.316	0.432	0.15668	0	CPSF4L	rods
SLC22A18	8.78e-12	-0.267012	0.217	0.4	1.72e-07	0	SLC22A18	rods
CNTFR	2.91e-10	-0.26708	0.777	0.871	5.7e-06	0	CNTFR	rods
WDR25	6.75e-10	-0.267225	0.788	0.875	1.32e-05	0	WDR25	rods
STX16	1.08e-08	-0.267405	0.501	0.649	0.000212472	0	STX16	rods
RPGRIP1L	5.24e-09	-0.267493	0.506	0.655	0.00010274	0	RPGRIP1L	rods
GRIN3A	6.03e-09	-0.267525	0.309	0.461	0.00011814	0	GRIN3A	rods
MSANTD1	4.05e-12	-0.267593	0.102	0.259	7.94e-08	0	MSANTD1	rods
LIMS2	1.7e-09	-0.267698	0.406	0.59	3.34e-05	0	LIMS2	rods
TMEM232	1.74e-10	-0.267902	0.65	0.78	3.41e-06	0	TMEM232	rods
SH3GL2	5.27e-10	-0.267935	0.397	0.575	1.03e-05	0	SH3GL2	rods
IRX1	5.65e-12	-0.268149	0.126	0.291	1.11e-07	0	IRX1	rods
TRANK1	8.55e-12	-0.268165	0.237	0.431	1.68e-07	0	TRANK1	rods
ANKRD29	3.46e-12	-0.268292	0.214	0.401	6.78e-08	0	ANKRD29	rods
SP7	5.88e-11	-0.268347	0.174	0.331	1.15e-06	0	SP7	rods
IKBKE	1.82e-11	-0.268447	0.14	0.299	3.58e-07	0	IKBKE	rods
SLC6A5	6.17e-08	-0.268643	0.339	0.486	0.00120941	0	SLC6A5	rods
ARHGEF40	1.43e-10	-0.268885	0.528	0.705	2.81e-06	0	ARHGEF40	rods
ERBB2	2.1e-09	-0.269058	0.318	0.503	4.12e-05	0	ERBB2	rods
ADAMTS20	5.53e-11	-0.269077	0.242	0.424	1.08e-06	0	ADAMTS20	rods
RP11-540D14.8	2.21e-09	-0.26969	0.718	0.848	4.33e-05	0	RP11-540D14.8	rods
REPS1	8.9e-09	-0.269817	0.467	0.636	0.000174592	0	REPS1	rods
ERF	2.23e-09	-0.270361	0.361	0.537	4.38e-05	0	ERF	rods
SH3BP5	2.91e-09	-0.270391	0.49	0.65	5.71e-05	0	SH3BP5	rods
RXFP1	1.74e-13	-0.270407	0.176	0.365	3.41e-09	0	RXFP1	rods
HES1	2.98e-06	-0.27041	0.492	0.609	0.0584776	0	HES1	rods
ANO5	3.36e-12	-0.270412	0.176	0.358	6.58e-08	0	ANO5	rods
GAS2	7.61e-09	-0.270465	0.596	0.738	0.000149296	0	GAS2	rods
FGFR1	8.55e-10	-0.270505	0.492	0.661	1.68e-05	0	FGFR1	rods
MCAM	5.76e-06	-0.270513	0.47	0.575	0.112975	0	MCAM	rods
GLDC	1.9e-10	-0.270554	0.427	0.6	3.73e-06	0	GLDC	rods
C19orf45	1e-12	-0.270618	0.178	0.363	1.96e-08	0	C19orf45	rods
MVB12B	3.51e-11	-0.270739	0.837	0.918	6.88e-07	0	MVB12B	rods
NTNG1	8.81e-10	-0.270805	0.512	0.667	1.73e-05	0	NTNG1	rods
EML2	2.64e-09	-0.270836	0.528	0.686	5.17e-05	0	EML2	rods
LRGUK	3.25e-09	-0.270856	0.363	0.526	6.36e-05	0	LRGUK	rods
CMTM8	1.7e-10	-0.271045	0.372	0.557	3.33e-06	0	CMTM8	rods
ZPLD1	7.32e-08	-0.271094	0.343	0.502	0.00143531	0	ZPLD1	rods
SHANK3	7.69e-10	-0.271099	0.515	0.674	1.51e-05	0	SHANK3	rods
RP11-404P21.8	3.78e-12	-0.271262	0.214	0.407	7.41e-08	0	RP11-404P21.8	rods
CYYR1	6.61e-13	-0.271552	0.199	0.388	1.3e-08	0	CYYR1	rods
SPPL2B	2.65e-09	-0.271617	0.332	0.494	5.2e-05	0	SPPL2B	rods
METTL15	1.29e-07	-0.271777	0.576	0.689	0.00252103	0	METTL15	rods
NGF	3.08e-13	-0.271827	0.086	0.245	6.03e-09	0	NGF	rods
ARHGAP25	2.11e-11	-0.271901	0.248	0.432	4.14e-07	0	ARHGAP25	rods
SNRPD3	3.9e-09	-0.271963	0.702	0.83	7.64e-05	0	SNRPD3	rods
GRXCR1	2.18e-13	-0.272253	0.07	0.225	4.28e-09	0	GRXCR1	rods
FNDC3B	7.14e-09	-0.272417	0.725	0.826	0.000140045	0	FNDC3B	rods
IQCH	1.73e-10	-0.272542	0.623	0.768	3.39e-06	0	IQCH	rods
MTUS1	2.77e-09	-0.272623	0.682	0.803	5.42e-05	0	MTUS1	rods
ASPDH	1.14e-09	-0.273012	0.167	0.31	2.24e-05	0	ASPDH	rods
LRRC3B	1.31e-09	-0.273245	0.253	0.421	2.57e-05	0	LRRC3B	rods
PRSS51	9.95e-12	-0.273348	0.156	0.325	1.95e-07	0	PRSS51	rods
PLA2G4A	1.16e-10	-0.273357	0.248	0.425	2.28e-06	0	PLA2G4A	rods
SIPA1L2	5.25e-10	-0.273468	0.269	0.44	1.03e-05	0	SIPA1L2	rods
CCDC88C	1.77e-08	-0.273515	0.797	0.885	0.000346614	0	CCDC88C	rods
EPHB4	6.83e-12	-0.273716	0.26	0.452	1.34e-07	0	EPHB4	rods
AGTR1	1.25e-14	-0.273747	0.061	0.221	2.46e-10	0	AGTR1	rods
GSN	8.97e-10	-0.273901	0.544	0.699	1.76e-05	0	GSN	rods
RANBP17	8.9e-10	-0.273976	0.546	0.717	1.74e-05	0	RANBP17	rods
MCUB	7.52e-11	-0.274391	0.341	0.519	1.47e-06	0	MCUB	rods
KIAA1755	2.12e-09	-0.274484	0.318	0.485	4.16e-05	0	KIAA1755	rods
GPR85	7.04e-13	-0.274597	0.084	0.239	1.38e-08	0	GPR85	rods
GABRB3	5.77e-10	-0.274617	0.792	0.883	1.13e-05	0	GABRB3	rods
ANKRD55	3.32e-14	-0.274704	0.111	0.291	6.51e-10	0	ANKRD55	rods
SCN2A	3.55e-12	-0.274714	0.257	0.448	6.95e-08	0	SCN2A	rods
TMEM154	1.11e-13	-0.274827	0.099	0.266	2.17e-09	0	TMEM154	rods
FAM169B	8.5e-16	-0.274864	0.054	0.225	1.67e-11	0	FAM169B	rods
ZBBX	3.32e-12	-0.274993	0.16	0.338	6.5e-08	0	ZBBX	rods
PRX	2.12e-11	-0.275007	0.185	0.356	4.15e-07	0	PRX	rods
NOTCH1	1.2e-06	-0.275008	0.869	0.909	0.0236084	0	NOTCH1	rods
TIAM2	4.08e-10	-0.275038	0.858	0.904	8.01e-06	0	TIAM2	rods
PAX8	9.51e-09	-0.275169	0.411	0.57	0.000186531	0	PAX8	rods
DGKK	2.45e-15	-0.27524	0.097	0.283	4.81e-11	0	DGKK	rods
CD24	1.62e-10	-0.275262	0.293	0.471	3.17e-06	0	CD24	rods
TXNRD2	6.35e-10	-0.275272	0.479	0.657	1.24e-05	0	TXNRD2	rods
SLFN5	6.68e-12	-0.275445	0.305	0.498	1.31e-07	0	SLFN5	rods
MED12L	6.36e-11	-0.275513	0.74	0.848	1.25e-06	0	MED12L	rods
TMEM215	1.49e-14	-0.275652	0.09	0.264	2.92e-10	0	TMEM215	rods
MYO18B	6.45e-07	-0.275756	0.711	0.776	0.0126408	0	MYO18B	rods
ADCY3	5.89e-10	-0.276007	0.54	0.697	1.15e-05	0	ADCY3	rods
OLIG2	4.01e-10	-0.276065	0.273	0.441	7.87e-06	0	OLIG2	rods
SLA	1.37e-08	-0.276255	0.269	0.416	0.000268329	0	SLA	rods
BBOX1	3.56e-16	-0.276334	0.038	0.202	6.98e-12	0	BBOX1	rods
FAM43B	7.66e-15	-0.27644	0.104	0.288	1.5e-10	0	FAM43B	rods
SHC4	6.29e-11	-0.276667	0.433	0.626	1.23e-06	0	SHC4	rods
CX3CL1	4.95e-14	-0.276837	0.133	0.317	9.7e-10	0	CX3CL1	rods
ASCL1	7.1e-12	-0.276943	0.28	0.476	1.39e-07	0	ASCL1	rods
HKDC1	2.54e-10	-0.277173	0.253	0.42	4.97e-06	0	HKDC1	rods
AC023283.1	3.42e-12	-0.277442	0.153	0.325	6.71e-08	0	AC023283.1	rods
FAM234B	2.06e-11	-0.277526	0.569	0.731	4.04e-07	0	FAM234B	rods
MRAP2	4.52e-12	-0.277633	0.26	0.46	8.86e-08	0	MRAP2	rods
EFCAB5	7.1e-12	-0.277676	0.488	0.687	1.39e-07	0	EFCAB5	rods
SLC30A8	8.47e-10	-0.277757	0.239	0.403	1.66e-05	0	SLC30A8	rods
NKD2	3.52e-09	-0.277942	0.282	0.439	6.9e-05	0	NKD2	rods
C1orf127	2e-10	-0.278058	0.257	0.424	3.93e-06	0	C1orf127	rods
CCDC141	3.69e-11	-0.278431	0.318	0.505	7.24e-07	0	CCDC141	rods
CASP7	1.62e-11	-0.278526	0.255	0.445	3.18e-07	0	CASP7	rods
RIMKLB	2.85e-08	-0.278663	0.542	0.679	0.00055899	0	RIMKLB	rods
FAM83F	7.62e-10	-0.278666	0.411	0.585	1.49e-05	0	FAM83F	rods
TPBG	4.11e-14	-0.278667	0.14	0.328	8.07e-10	0	TPBG	rods
KIF5C	1.77e-10	-0.27867	0.797	0.89	3.48e-06	0	KIF5C	rods
SULT2B1	7.1e-09	-0.278702	0.3	0.452	0.000139183	0	SULT2B1	rods
RFX8	3.68e-11	-0.278835	0.223	0.393	7.22e-07	0	RFX8	rods
LSP1	1.08e-10	-0.279057	0.187	0.349	2.12e-06	0	LSP1	rods
TMEM51	4.11e-10	-0.27917	0.42	0.589	8.06e-06	0	TMEM51	rods
C9orf3	2.53e-12	-0.279324	0.86	0.928	4.97e-08	0	C9orf3	rods
LMO4	1.05e-10	-0.279332	0.558	0.71	2.05e-06	0	LMO4	rods
DACT2	5.33e-09	-0.279361	0.386	0.557	0.000104499	0	DACT2	rods
CNTN2	3.45e-09	-0.279546	0.366	0.518	6.76e-05	0	CNTN2	rods
AOAH	3.28e-08	-0.279624	0.424	0.574	0.000643396	0	AOAH	rods
PTCHD4	2.07e-11	-0.279647	0.183	0.357	4.05e-07	0	PTCHD4	rods
S1PR1	5.11e-11	-0.279659	0.212	0.381	1e-06	0	S1PR1	rods
SFRP4	5.28e-14	-0.279733	0.253	0.466	1.04e-09	0	SFRP4	rods
PRDM5	2.49e-10	-0.279788	0.424	0.605	4.88e-06	0	PRDM5	rods
LRRC8C	1.96e-11	-0.280036	0.503	0.689	3.83e-07	0	LRRC8C	rods
SAMD5	3.8e-11	-0.280067	0.492	0.672	7.45e-07	0	SAMD5	rods
RP5-1028K7.3	4.22e-11	-0.280113	0.352	0.525	8.27e-07	0	RP5-1028K7.3	rods
ATP8B4	6.85e-11	-0.280568	0.273	0.46	1.34e-06	0	ATP8B4	rods
CTD-2535L24.2	9.41e-10	-0.281012	0.555	0.702	1.84e-05	0	CTD-2535L24.2	rods
CD58	1.19e-10	-0.281041	0.242	0.417	2.34e-06	0	CD58	rods
ZMIZ1	3.66e-21	-0.28105	0.986	0.994	7.17e-17	0	ZMIZ1	rods
MITF	8.74e-10	-0.281067	0.506	0.673	1.71e-05	0	MITF	rods
LIMK2	7.47e-09	-0.281207	0.603	0.751	0.000146369	0	LIMK2	rods
RNF216	3.87e-10	-0.281229	0.731	0.843	7.58e-06	0	RNF216	rods
IL22RA1	1.25e-16	-0.281543	0.043	0.212	2.45e-12	0	IL22RA1	rods
MAL	8.16e-11	-0.281865	0.176	0.345	1.6e-06	0	MAL	rods
BMP6	6.74e-09	-0.282308	0.406	0.562	0.00013215	0	BMP6	rods
SLC12A3	2.31e-15	-0.282317	0.095	0.274	4.54e-11	0	SLC12A3	rods
KRT23	6e-17	-0.282532	0.02	0.178	1.18e-12	0	KRT23	rods
GRASP	2.44e-11	-0.282589	0.284	0.48	4.78e-07	0	GRASP	rods
B4GALT6	3.8e-08	-0.282851	0.395	0.544	0.000744216	0	B4GALT6	rods
SPTB	3.02e-09	-0.282853	0.637	0.775	5.92e-05	0	SPTB	rods
TRIM6-TRIM34	3e-17	-0.28307	0.043	0.217	5.87e-13	0	TRIM6-TRIM34	rods
ANGPTL2	9.81e-13	-0.283139	0.269	0.456	1.92e-08	0	ANGPTL2	rods
SPHKAP	3.09e-07	-0.283189	0.305	0.437	0.00605715	0	SPHKAP	rods
TBXAS1	1.22e-08	-0.283412	0.677	0.8	0.000239438	0	TBXAS1	rods
CFAP73	3.84e-12	-0.283413	0.233	0.418	7.52e-08	0	CFAP73	rods
TNN	4.16e-12	-0.283621	0.129	0.293	8.17e-08	0	TNN	rods
GNAO1	2.01e-12	-0.283756	0.74	0.87	3.95e-08	0	GNAO1	rods
GABRA6	2.49e-12	-0.283868	0.163	0.336	4.88e-08	0	GABRA6	rods
PRPSAP1	3.73e-10	-0.284014	0.686	0.799	7.32e-06	0	PRPSAP1	rods
ORAOV1	0.000128361	-0.284092	0.524	0.615	1	0	ORAOV1	rods
LRP4	1.87e-08	-0.284111	0.46	0.6	0.000366761	0	LRP4	rods
FGFR2	5.23e-09	-0.284243	0.506	0.667	0.000102493	0	FGFR2	rods
NELL2	2.12e-11	-0.284323	0.754	0.878	4.16e-07	0	NELL2	rods
GDF1	8.97e-13	-0.284366	0.379	0.589	1.76e-08	0	GDF1	rods
IQCJ	8.82e-11	-0.284458	0.264	0.442	1.73e-06	0	IQCJ	rods
CYTIP	6.38e-17	-0.284721	0.054	0.234	1.25e-12	0	CYTIP	rods
RNF217	2.49e-12	-0.284943	0.271	0.469	4.88e-08	0	RNF217	rods
STOML3	3.33e-17	-0.285226	0.034	0.204	6.52e-13	0	STOML3	rods
CMKLR1	7.04e-15	-0.285397	0.106	0.29	1.38e-10	0	CMKLR1	rods
VAV2	2.65e-14	-0.285595	0.926	0.966	5.2e-10	0	VAV2	rods
MAPT	1.77e-08	-0.285625	0.718	0.806	0.000347816	0	MAPT	rods
SUSD4	9.52e-07	-0.286068	0.499	0.62	0.0186613	0	SUSD4	rods
SIDT1	6.22e-12	-0.286115	0.201	0.386	1.22e-07	0	SIDT1	rods
PCLO	2.08e-09	-0.286121	0.673	0.806	4.08e-05	0	PCLO	rods
FPGT-TNNI3K	2.48e-10	-0.286612	0.56	0.717	4.87e-06	0	FPGT-TNNI3K	rods
CTNNBL1	5.02e-10	-0.287108	0.713	0.823	9.83e-06	0	CTNNBL1	rods
FIGN	1.18e-09	-0.287286	0.67	0.791	2.31e-05	0	FIGN	rods
ISM1	1.26e-11	-0.287383	0.251	0.444	2.46e-07	0	ISM1	rods
KCNIP3	1.35e-10	-0.287552	0.589	0.742	2.64e-06	0	KCNIP3	rods
C1orf141	9.05e-15	-0.287738	0.169	0.37	1.77e-10	0	C1orf141	rods
HES5	1.36e-07	-0.287919	0.3	0.43	0.0026677	0	HES5	rods
HAS2	2.25e-16	-0.287985	0.084	0.272	4.41e-12	0	HAS2	rods
VILL	2.89e-10	-0.288003	0.391	0.562	5.66e-06	0	VILL	rods
DKKL1	1.06e-12	-0.288077	0.212	0.401	2.08e-08	0	DKKL1	rods
PDGFC	7.64e-10	-0.288093	0.413	0.592	1.5e-05	0	PDGFC	rods
LPAR1	2.28e-12	-0.288233	0.176	0.357	4.47e-08	0	LPAR1	rods
FMNL2	4.87e-11	-0.288539	0.781	0.901	9.56e-07	0	FMNL2	rods
RGS12	4.59e-12	-0.288662	0.831	0.902	9e-08	0	RGS12	rods
AJUBA	8.51e-07	-0.288671	0.406	0.516	0.016684	0	AJUBA	rods
NAT16	1.17e-14	-0.288812	0.142	0.339	2.29e-10	0	NAT16	rods
COL20A1	9.97e-12	-0.288867	0.388	0.57	1.96e-07	0	COL20A1	rods
GTF2A1L	4.63e-13	-0.288894	0.153	0.332	9.08e-09	0	GTF2A1L	rods
KIAA1147	3.05e-08	-0.288911	0.422	0.571	0.000598323	0	KIAA1147	rods
HS3ST2	1.03e-13	-0.288941	0.142	0.328	2.01e-09	0	HS3ST2	rods
NAA11	4.18e-17	-0.288999	0.056	0.238	8.2e-13	0	NAA11	rods
PRIMA1	1.5e-09	-0.289096	0.501	0.667	2.95e-05	0	PRIMA1	rods
PTPRB	2.88e-11	-0.289149	0.223	0.395	5.64e-07	0	PTPRB	rods
SATB2	3.33e-10	-0.289408	0.632	0.768	6.53e-06	0	SATB2	rods
GPC4	2.93e-11	-0.289554	0.251	0.434	5.74e-07	0	GPC4	rods
TTC33	1.11e-08	-0.289658	0.594	0.729	0.000216665	0	TTC33	rods
PTPRR	3.29e-11	-0.289723	0.454	0.641	6.44e-07	0	PTPRR	rods
LPAR3	2.75e-12	-0.289996	0.147	0.319	5.39e-08	0	LPAR3	rods
CDH17	5.89e-13	-0.290139	0.115	0.28	1.16e-08	0	CDH17	rods
CLCA2	1.44e-17	-0.290252	0.056	0.24	2.83e-13	0	CLCA2	rods
PCSK1	1.2e-11	-0.290304	0.165	0.333	2.35e-07	0	PCSK1	rods
FGD2	1.92e-13	-0.290532	0.138	0.316	3.77e-09	0	FGD2	rods
EBF2	4.03e-12	-0.290552	0.641	0.794	7.89e-08	0	EBF2	rods
SHC2	3.81e-10	-0.290556	0.438	0.607	7.48e-06	0	SHC2	rods
CERS1	4.6e-13	-0.290695	0.379	0.591	9.01e-09	0	CERS1	rods
KLHL13	1.51e-13	-0.290805	0.163	0.354	2.96e-09	0	KLHL13	rods
UNC93A	6.25e-15	-0.290902	0.074	0.241	1.22e-10	0	UNC93A	rods
ST3GAL6	1.25e-13	-0.291212	0.291	0.493	2.45e-09	0	ST3GAL6	rods
RFX4	2.33e-09	-0.291384	0.503	0.654	4.57e-05	0	RFX4	rods
MMP26	1.69e-13	-0.291451	0.126	0.302	3.3e-09	0	MMP26	rods
CEP126	7.59e-10	-0.2917	0.424	0.595	1.49e-05	0	CEP126	rods
PHYHIP	3.01e-15	-0.291741	0.106	0.293	5.91e-11	0	PHYHIP	rods
SLC12A7	3.7e-09	-0.291785	0.483	0.636	7.26e-05	0	SLC12A7	rods
ADGRB2	9.86e-10	-0.291897	0.609	0.759	1.93e-05	0	ADGRB2	rods
FAM171A1	1.56e-07	-0.292123	0.668	0.758	0.00306345	0	FAM171A1	rods
BUB1B-PAK6	1.32e-11	-0.292326	0.325	0.517	2.6e-07	0	BUB1B-PAK6	rods
OTOF	2.23e-11	-0.292488	0.474	0.639	4.36e-07	0	OTOF	rods
FHAD1	3.76e-09	-0.292504	0.578	0.714	7.37e-05	0	FHAD1	rods
TUBA1C	2.57e-11	-0.292566	0.704	0.822	5.04e-07	0	TUBA1C	rods
PCDH10	5.46e-10	-0.292578	0.528	0.696	1.07e-05	0	PCDH10	rods
BCL11A	1.3e-10	-0.292675	0.7	0.834	2.54e-06	0	BCL11A	rods
SMIM12	8.33e-10	-0.292734	0.512	0.679	1.63e-05	0	SMIM12	rods
AIG1	1.55e-10	-0.292808	0.476	0.66	3.04e-06	0	AIG1	rods
PITPNM3	1.23e-11	-0.29313	0.614	0.77	2.41e-07	0	PITPNM3	rods
CHRNA2	3.23e-16	-0.293204	0.065	0.242	6.33e-12	0	CHRNA2	rods
MYOM1	5.93e-16	-0.293356	0.113	0.309	1.16e-11	0	MYOM1	rods
ONECUT3	2.88e-10	-0.293375	0.289	0.46	5.65e-06	0	ONECUT3	rods
THBD	8.88e-19	-0.293584	0.07	0.276	1.74e-14	0	THBD	rods
PHLDB1	6.13e-11	-0.293697	0.58	0.754	1.2e-06	0	PHLDB1	rods
ADCYAP1R1	2.52e-12	-0.293942	0.291	0.49	4.94e-08	0	ADCYAP1R1	rods
PTGFR	3.39e-11	-0.294593	0.282	0.469	6.65e-07	0	PTGFR	rods
KCND3	1.64e-08	-0.294727	0.747	0.821	0.000320713	0	KCND3	rods
INHBA	1.66e-14	-0.294828	0.126	0.315	3.26e-10	0	INHBA	rods
CMTM3	5.2e-12	-0.295005	0.282	0.471	1.02e-07	0	CMTM3	rods
SNX9	2.05e-10	-0.295044	0.555	0.71	4.02e-06	0	SNX9	rods
SYBU	1.01e-11	-0.295275	0.612	0.782	1.99e-07	0	SYBU	rods
ACTA2	2.35e-12	-0.295329	0.199	0.384	4.6e-08	0	ACTA2	rods
ADGRD2	1.24e-12	-0.295392	0.153	0.326	2.43e-08	0	ADGRD2	rods
ATG16L1	1.01e-09	-0.295501	0.451	0.608	1.98e-05	0	ATG16L1	rods
SERPINB7	4.81e-18	-0.295535	0.014	0.175	9.43e-14	0	SERPINB7	rods
ANKRD7	2.76e-11	-0.295594	0.244	0.422	5.42e-07	0	ANKRD7	rods
AMOT	2.72e-10	-0.295725	0.391	0.56	5.33e-06	0	AMOT	rods
OSBPL5	9.3e-10	-0.295892	0.628	0.759	1.82e-05	0	OSBPL5	rods
VWA3B	4.06e-10	-0.295976	0.467	0.621	7.97e-06	0	VWA3B	rods
PTK7	2.25e-11	-0.296003	0.65	0.787	4.42e-07	0	PTK7	rods
KRT15	1.58e-18	-0.296273	0.018	0.187	3.09e-14	0	KRT15	rods
SCUBE2	9.38e-10	-0.296293	0.395	0.559	1.84e-05	0	SCUBE2	rods
CNGB3	3.1e-12	-0.296417	0.21	0.391	6.08e-08	0	CNGB3	rods
HRH1	1.23e-15	-0.296591	0.178	0.385	2.42e-11	0	HRH1	rods
TSHZ3	6.84e-10	-0.296762	0.515	0.673	1.34e-05	0	TSHZ3	rods
EBF1	1.51e-11	-0.29682	0.867	0.924	2.97e-07	0	EBF1	rods
SYT17	1.35e-16	-0.296979	0.07	0.252	2.66e-12	0	SYT17	rods
TSPAN2	1.36e-14	-0.296987	0.163	0.362	2.67e-10	0	TSPAN2	rods
PIP5K1B	5.85e-11	-0.297272	0.874	0.918	1.15e-06	0	PIP5K1B	rods
PSTPIP1	4.25e-11	-0.297489	0.327	0.493	8.34e-07	0	PSTPIP1	rods
MYO18A	5.44e-15	-0.29755	0.903	0.959	1.07e-10	0	MYO18A	rods
UMODL1	9.59e-10	-0.297712	0.524	0.662	1.88e-05	0	UMODL1	rods
SOSTDC1	1.93e-19	-0.297716	0.038	0.23	3.78e-15	0	SOSTDC1	rods
2009-09-01	3.94e-16	-0.298038	0.948	0.977	7.72e-12	0	2009-09-01	rods
NLRC5	3.31e-15	-0.298102	0.244	0.466	6.5e-11	0	NLRC5	rods
TIMP2	2.2e-11	-0.298241	0.646	0.801	4.31e-07	0	TIMP2	rods
PDE9A	3.41e-12	-0.298306	0.716	0.828	6.68e-08	0	PDE9A	rods
TMEM184B	1.85e-12	-0.298651	0.648	0.792	3.63e-08	0	TMEM184B	rods
ADAMTS10	3.28e-11	-0.298931	0.449	0.643	6.43e-07	0	ADAMTS10	rods
RND2	9.07e-16	-0.299009	0.226	0.446	1.78e-11	0	RND2	rods
HS3ST3A1	2.71e-14	-0.299022	0.185	0.388	5.32e-10	0	HS3ST3A1	rods
DDAH1	6.1e-11	-0.299114	0.609	0.768	1.2e-06	0	DDAH1	rods
KLHL32	1.04e-10	-0.299144	0.53	0.687	2.03e-06	0	KLHL32	rods
FER1L6	4.16e-10	-0.299211	0.302	0.48	8.16e-06	0	FER1L6	rods
GCNT2	2.22e-10	-0.299275	0.528	0.682	4.35e-06	0	GCNT2	rods
SYK	1.59e-12	-0.299304	0.284	0.486	3.13e-08	0	SYK	rods
PTK2B	3.76e-12	-0.299637	0.503	0.69	7.37e-08	0	PTK2B	rods
CCR2	3.1e-19	-0.299666	0.011	0.178	6.08e-15	0	CCR2	rods
F3	2.32e-13	-0.29993	0.142	0.322	4.54e-09	0	F3	rods
LCP1	5.26e-12	-0.299956	0.291	0.491	1.03e-07	0	LCP1	rods
RGS9	7.83e-11	-0.299964	0.54	0.703	1.53e-06	0	RGS9	rods
SH3BP2	8.55e-10	-0.300047	0.528	0.657	1.68e-05	0	SH3BP2	rods
MYO15A	2.52e-10	-0.300055	0.305	0.473	4.94e-06	0	MYO15A	rods
LY86	1.17e-14	-0.300613	0.061	0.224	2.3e-10	0	LY86	rods
ASB4	1.18e-11	-0.300697	0.208	0.379	2.32e-07	0	ASB4	rods
FEZ1	4.19e-11	-0.300715	0.341	0.526	8.22e-07	0	FEZ1	rods
LMO7	2.18e-12	-0.300893	0.289	0.473	4.28e-08	0	LMO7	rods
ARHGEF2	1.12e-11	-0.300974	0.4	0.599	2.2e-07	0	ARHGEF2	rods
DCLK2	1.03e-10	-0.30116	0.7	0.829	2.02e-06	0	DCLK2	rods
SLC20A2	1.38e-10	-0.301346	0.424	0.596	2.7e-06	0	SLC20A2	rods
EPHA10	8.32e-08	-0.301456	0.415	0.554	0.00163138	0	EPHA10	rods
ZNF710	4.59e-12	-0.301573	0.576	0.724	8.99e-08	0	ZNF710	rods
TMTC1	3.87e-11	-0.301576	0.641	0.776	7.6e-07	0	TMTC1	rods
WDR63	3.77e-13	-0.301646	0.438	0.649	7.38e-09	0	WDR63	rods
ANTXR2	6.32e-13	-0.301816	0.424	0.628	1.24e-08	0	ANTXR2	rods
PLCG2	1.95e-10	-0.301965	0.391	0.567	3.82e-06	0	PLCG2	rods
BOC	9.19e-11	-0.302095	0.652	0.781	1.8e-06	0	BOC	rods
SVIL	1.12e-12	-0.302301	0.797	0.89	2.2e-08	0	SVIL	rods
LRRK2	1.06e-14	-0.302403	0.203	0.419	2.08e-10	0	LRRK2	rods
SCARB1	1.84e-11	-0.302449	0.707	0.843	3.61e-07	0	SCARB1	rods
TPD52L1	1.44e-11	-0.302564	0.275	0.465	2.83e-07	0	TPD52L1	rods
FAM160A1	4.29e-07	-0.30263	0.767	0.824	0.00841876	0	FAM160A1	rods
ANKRD6	8.35e-10	-0.302838	0.578	0.718	1.64e-05	0	ANKRD6	rods
TUBB2B	3.2e-12	-0.303013	0.609	0.76	6.27e-08	0	TUBB2B	rods
SNCA	8.86e-13	-0.303082	0.397	0.582	1.74e-08	0	SNCA	rods
DLGAP4	8.13e-13	-0.30347	0.874	0.929	1.59e-08	0	DLGAP4	rods
RAI2	2.04e-15	-0.303515	0.167	0.374	4e-11	0	RAI2	rods
SCRT2	1.71e-09	-0.303613	0.354	0.517	3.35e-05	0	SCRT2	rods
GABRA3	3.39e-13	-0.303776	0.131	0.306	6.65e-09	0	GABRA3	rods
CCND1	1.77e-07	-0.304003	0.625	0.73	0.00346988	0	CCND1	rods
FZD2	4.07e-10	-0.30413	0.23	0.387	7.97e-06	0	FZD2	rods
EGFR	1.95e-11	-0.304821	0.754	0.874	3.82e-07	0	EGFR	rods
ITIH5	1.19e-14	-0.304907	0.194	0.394	2.34e-10	0	ITIH5	rods
GPR26	5.1e-16	-0.304943	0.041	0.201	1e-11	0	GPR26	rods
GAREM1	4.39e-11	-0.305192	0.756	0.862	8.61e-07	0	GAREM1	rods
CYR61	4.65e-12	-0.305228	0.149	0.315	9.11e-08	0	CYR61	rods
FABP3	1.46e-12	-0.30535	0.16	0.333	2.87e-08	0	FABP3	rods
DLG5	5.04e-12	-0.305387	0.616	0.765	9.88e-08	0	DLG5	rods
TANC1	8.73e-15	-0.305544	0.84	0.934	1.71e-10	0	TANC1	rods
ARAP3	4.16e-12	-0.30557	0.221	0.41	8.16e-08	0	ARAP3	rods
ATP9A	1.18e-10	-0.305704	0.578	0.732	2.32e-06	0	ATP9A	rods
UNC5B	2.95e-14	-0.306126	0.743	0.884	5.78e-10	0	UNC5B	rods
IGFBP2	8.3e-11	-0.306179	0.341	0.523	1.63e-06	0	IGFBP2	rods
ACP6	2.96e-13	-0.306189	0.203	0.399	5.81e-09	0	ACP6	rods
SGK223	4.2e-11	-0.306253	0.397	0.576	8.23e-07	0	SGK223	rods
SLC22A11	4.53e-16	-0.306563	0.124	0.321	8.89e-12	0	SLC22A11	rods
KCNA6	1.28e-17	-0.307133	0.079	0.277	2.51e-13	0	KCNA6	rods
DOCK11	1.98e-11	-0.307174	0.289	0.477	3.88e-07	0	DOCK11	rods
GNAS	2.49e-12	-0.307256	0.7	0.831	4.88e-08	0	GNAS	rods
CERS3	2.55e-12	-0.307493	0.077	0.223	5e-08	0	CERS3	rods
CYFIP1	5.28e-13	-0.307499	0.384	0.614	1.04e-08	0	CYFIP1	rods
WWP2	3.9e-10	-0.307501	0.521	0.67	7.65e-06	0	WWP2	rods
TSC22D4	3.63e-11	-0.307584	0.393	0.571	7.12e-07	0	TSC22D4	rods
SLC6A12	5.58e-14	-0.308342	0.181	0.374	1.09e-09	0	SLC6A12	rods
RASAL1	4.59e-15	-0.308371	0.084	0.258	8.99e-11	0	RASAL1	rods
TMEM200A	3.19e-14	-0.308532	0.235	0.448	6.26e-10	0	TMEM200A	rods
MSI2	7.54e-23	-0.30882	0.986	0.997	1.48e-18	0	MSI2	rods
MYOM3	2.33e-14	-0.308923	0.192	0.391	4.58e-10	0	MYOM3	rods
PLAT	4.21e-13	-0.309089	0.169	0.35	8.25e-09	0	PLAT	rods
EFNB3	1.59e-15	-0.309092	0.135	0.335	3.13e-11	0	EFNB3	rods
LAPTM5	3.1e-16	-0.309169	0.104	0.299	6.08e-12	0	LAPTM5	rods
EIF4E3	2.21e-10	-0.309251	0.521	0.692	4.33e-06	0	EIF4E3	rods
ARHGEF10L	4.77e-14	-0.309364	0.883	0.943	9.35e-10	0	ARHGEF10L	rods
SFRP2	2.04e-10	-0.309506	0.271	0.439	4e-06	0	SFRP2	rods
MYO1E	7.29e-12	-0.309516	0.598	0.757	1.43e-07	0	MYO1E	rods
MEDAG	1.92e-14	-0.309727	0.169	0.366	3.77e-10	0	MEDAG	rods
NID2	8.32e-14	-0.309778	0.201	0.398	1.63e-09	0	NID2	rods
HDAC4	2.12e-18	-0.310041	0.964	0.98	4.15e-14	0	HDAC4	rods
CALCR	2.27e-14	-0.310181	0.104	0.277	4.45e-10	0	CALCR	rods
MAPK4	8.37e-11	-0.310194	0.632	0.775	1.64e-06	0	MAPK4	rods
SPOCK2	5.65e-10	-0.310592	0.492	0.638	1.11e-05	0	SPOCK2	rods
TAGLN3	3.07e-14	-0.310642	0.334	0.554	6.03e-10	0	TAGLN3	rods
CDK6	4.62e-13	-0.310691	0.781	0.884	9.05e-09	0	CDK6	rods
FAM171B	4e-13	-0.310701	0.341	0.54	7.84e-09	0	FAM171B	rods
BCAN	1.99e-13	-0.310905	0.275	0.478	3.9e-09	0	BCAN	rods
MMP17	2.59e-11	-0.311029	0.402	0.589	5.08e-07	0	MMP17	rods
ANXA8L1	4.82e-15	-0.311052	0.113	0.293	9.45e-11	0	ANXA8L1	rods
NOTCH3	3.19e-11	-0.311073	0.458	0.62	6.26e-07	0	NOTCH3	rods
IPCEF1	1.23e-15	-0.311114	0.12	0.315	2.42e-11	0	IPCEF1	rods
KIAA1671	1.77e-13	-0.311219	0.761	0.88	3.47e-09	0	KIAA1671	rods
USP46	6.51e-14	-0.31149	0.325	0.541	1.28e-09	0	USP46	rods
ECE1	1.31e-12	-0.311563	0.84	0.902	2.57e-08	0	ECE1	rods
HIP1R	5.5e-11	-0.311667	0.386	0.563	1.08e-06	0	HIP1R	rods
VASH2	9.64e-11	-0.311817	0.515	0.667	1.89e-06	0	VASH2	rods
GNG12	3.18e-13	-0.311977	0.438	0.644	6.23e-09	0	GNG12	rods
TRPS1	1.45e-12	-0.312043	0.573	0.758	2.84e-08	0	TRPS1	rods
MEI4	5.35e-16	-0.312415	0.09	0.274	1.05e-11	0	MEI4	rods
TRIO	3.51e-19	-0.312508	0.964	0.98	6.88e-15	0	TRIO	rods
LPL	4.46e-15	-0.312627	0.111	0.296	8.74e-11	0	LPL	rods
ADAMTS16	2.59e-12	-0.312707	0.282	0.48	5.07e-08	0	ADAMTS16	rods
TMPRSS2	2.7e-17	-0.312823	0.088	0.283	5.29e-13	0	TMPRSS2	rods
SEZ6	1.62e-13	-0.313263	0.576	0.755	3.18e-09	0	SEZ6	rods
RAI14	1.17e-11	-0.313318	0.598	0.759	2.3e-07	0	RAI14	rods
WNT5A	9.48e-13	-0.313387	0.298	0.491	1.86e-08	0	WNT5A	rods
CCDC175	9.22e-13	-0.31372	0.264	0.457	1.81e-08	0	CCDC175	rods
CALD1	2.09e-09	-0.313767	0.479	0.635	4.1e-05	0	CALD1	rods
RALGPS1	2.8e-14	-0.313889	0.831	0.916	5.48e-10	0	RALGPS1	rods
TTYH1	1.98e-05	-0.314013	0.65	0.721	0.388827	0	TTYH1	rods
SLC8A3	4.37e-12	-0.3141	0.506	0.684	8.56e-08	0	SLC8A3	rods
HHAT	3.15e-11	-0.314292	0.695	0.828	6.17e-07	0	HHAT	rods
TIMP3	3.77e-14	-0.314547	0.217	0.427	7.39e-10	0	TIMP3	rods
CORO1C	1.65e-12	-0.314571	0.804	0.894	3.24e-08	0	CORO1C	rods
SRGAP1	3.35e-15	-0.314633	0.688	0.835	6.57e-11	0	SRGAP1	rods
SHH	7.84e-12	-0.314912	0.284	0.468	1.54e-07	0	SHH	rods
KYNU	9.85e-15	-0.315168	0.122	0.303	1.93e-10	0	KYNU	rods
TMEM26	4.52e-18	-0.315305	0.072	0.268	8.87e-14	0	TMEM26	rods
HOPX	9.14e-17	-0.315859	0.113	0.312	1.79e-12	0	HOPX	rods
ETV5	1.46e-10	-0.315967	0.695	0.82	2.86e-06	0	ETV5	rods
VWC2	1.07e-13	-0.316311	0.409	0.627	2.09e-09	0	VWC2	rods
LZTS1	1.12e-10	-0.316421	0.53	0.699	2.19e-06	0	LZTS1	rods
IKZF1	4.91e-15	-0.316551	0.221	0.434	9.62e-11	0	IKZF1	rods
PDLIM4	1.22e-10	-0.31661	0.508	0.668	2.4e-06	0	PDLIM4	rods
KCNJ3	6.21e-14	-0.317062	0.413	0.615	1.22e-09	0	KCNJ3	rods
CACNG7	4.39e-13	-0.317172	0.217	0.403	8.61e-09	0	CACNG7	rods
ARID5B	4.44e-10	-0.317199	0.582	0.723	8.71e-06	0	ARID5B	rods
SEMA3E	8.99e-15	-0.317219	0.264	0.474	1.76e-10	0	SEMA3E	rods
TPPP	3.23e-12	-0.317279	0.4	0.596	6.34e-08	0	TPPP	rods
MUC12	2.38e-18	-0.3173	0.054	0.244	4.67e-14	0	MUC12	rods
MARCO	6.45e-19	-0.317471	0.063	0.263	1.27e-14	0	MARCO	rods
C16orf45	5.21e-12	-0.317739	0.589	0.751	1.02e-07	0	C16orf45	rods
MCF2L2	3.11e-11	-0.317795	0.731	0.839	6.09e-07	0	MCF2L2	rods
FAP	5.89e-19	-0.317851	0.056	0.253	1.16e-14	0	FAP	rods
AL358113.1	1.59e-10	-0.318195	0.424	0.594	3.11e-06	0	AL358113.1	rods
ARHGEF17	1.7e-11	-0.318276	0.79	0.868	3.33e-07	0	ARHGEF17	rods
SCN5A	9.22e-12	-0.3185	0.485	0.654	1.81e-07	0	SCN5A	rods
EFNA5	2.14e-12	-0.318653	0.883	0.93	4.2e-08	0	EFNA5	rods
LRRTM1	1.26e-18	-0.318983	0.05	0.236	2.46e-14	0	LRRTM1	rods
SLCO2A1	1.25e-13	-0.31913	0.296	0.5	2.46e-09	0	SLCO2A1	rods
EPHA5	2.28e-11	-0.31969	0.806	0.877	4.46e-07	0	EPHA5	rods
ASPH	1.67e-11	-0.319938	0.725	0.829	3.28e-07	0	ASPH	rods
CHST8	1.74e-08	-0.320298	0.725	0.793	0.000340374	0	CHST8	rods
RUFY4	2.83e-14	-0.320617	0.203	0.402	5.55e-10	0	RUFY4	rods
SERINC5	1.04e-10	-0.320628	0.573	0.735	2.03e-06	0	SERINC5	rods
EDIL3	1.67e-12	-0.320631	0.589	0.788	3.27e-08	0	EDIL3	rods
EVA1C	2.55e-13	-0.320652	0.266	0.464	5.01e-09	0	EVA1C	rods
CD9	5.35e-12	-0.32117	0.379	0.574	1.05e-07	0	CD9	rods
ALDH1L1	1.36e-13	-0.321235	0.375	0.584	2.67e-09	0	ALDH1L1	rods
VWF	4.9e-12	-0.321354	0.542	0.699	9.61e-08	0	VWF	rods
RP11-439C15.6	1.65e-13	-0.321376	0.808	0.896	3.24e-09	0	RP11-439C15.6	rods
TMPRSS5	4.43e-18	-0.32165	0.032	0.205	8.68e-14	0	TMPRSS5	rods
ZC3H12C	7.01e-11	-0.322093	0.598	0.749	1.37e-06	0	ZC3H12C	rods
TTYH2	3.71e-14	-0.322155	0.562	0.746	7.28e-10	0	TTYH2	rods
HSPA12B	2.75e-13	-0.322214	0.325	0.53	5.38e-09	0	HSPA12B	rods
ERICH3	5.6e-16	-0.322261	0.138	0.343	1.1e-11	0	ERICH3	rods
HMGCLL1	1.7e-16	-0.322722	0.122	0.32	3.33e-12	0	HMGCLL1	rods
STAC2	2.69e-15	-0.32293	0.174	0.376	5.27e-11	0	STAC2	rods
DBN1	1.88e-13	-0.32295	0.46	0.655	3.68e-09	0	DBN1	rods
MYH9	1.35e-12	-0.323316	0.691	0.835	2.65e-08	0	MYH9	rods
TMEM130	3.72e-15	-0.323362	0.178	0.375	7.3e-11	0	TMEM130	rods
KLHL6	7.15e-14	-0.323663	0.117	0.294	1.4e-09	0	KLHL6	rods
MB21D2	3.37e-13	-0.32383	0.485	0.668	6.61e-09	0	MB21D2	rods
MYOCD	3e-15	-0.324069	0.167	0.368	5.89e-11	0	MYOCD	rods
TNXB	1.67e-14	-0.324108	0.341	0.566	3.28e-10	0	TNXB	rods
CCDC13	2.21e-13	-0.324279	0.366	0.562	4.34e-09	0	CCDC13	rods
NREP	1.37e-13	-0.32467	0.679	0.818	2.68e-09	0	NREP	rods
CAV3	5.61e-16	-0.324756	0.156	0.36	1.1e-11	0	CAV3	rods
VSTM4	1.35e-13	-0.324766	0.219	0.411	2.65e-09	0	VSTM4	rods
SYT11	1.06e-11	-0.324848	0.472	0.65	2.09e-07	0	SYT11	rods
RPTOR	9.45e-19	-0.325274	0.957	0.978	1.85e-14	0	RPTOR	rods
PEPD	2.17e-11	-0.325371	0.752	0.857	4.26e-07	0	PEPD	rods
MSRA	7.58e-16	-0.325381	0.894	0.936	1.49e-11	0	MSRA	rods
SIAH2	3.94e-14	-0.325913	0.388	0.595	7.72e-10	0	SIAH2	rods
CDK18	1.15e-12	-0.325937	0.352	0.548	2.26e-08	0	CDK18	rods
DTX4	1.06e-10	-0.326084	0.625	0.76	2.08e-06	0	DTX4	rods
RAB6B	6.33e-12	-0.32612	0.445	0.618	1.24e-07	0	RAB6B	rods
ASTN1	4.87e-10	-0.326193	0.7	0.822	9.55e-06	0	ASTN1	rods
HS3ST1	4.86e-14	-0.326304	0.178	0.369	9.53e-10	0	HS3ST1	rods
RAP1GAP2	7.29e-14	-0.326459	0.889	0.954	1.43e-09	0	RAP1GAP2	rods
SLC38A1	5.08e-12	-0.326531	0.415	0.619	9.95e-08	0	SLC38A1	rods
RP11-463C8.4	1.38e-16	-0.326761	0.858	0.93	2.7e-12	0	RP11-463C8.4	rods
RBFOX2	1.58e-15	-0.326806	0.804	0.894	3.11e-11	0	RBFOX2	rods
ABLIM1	7.69e-13	-0.326918	0.754	0.851	1.51e-08	0	ABLIM1	rods
TACC1	1.29e-14	-0.326975	0.585	0.758	2.53e-10	0	TACC1	rods
ARHGEF6	2.97e-17	-0.326993	0.178	0.403	5.82e-13	0	ARHGEF6	rods
SLC4A8	7.22e-14	-0.327078	0.524	0.725	1.42e-09	0	SLC4A8	rods
MLPH	9.05e-15	-0.327101	0.142	0.333	1.77e-10	0	MLPH	rods
FBXW4	1.04e-08	-0.327207	0.734	0.805	0.000204202	0	FBXW4	rods
BCL9L	6.93e-14	-0.327285	0.661	0.821	1.36e-09	0	BCL9L	rods
PIK3R5	1.69e-19	-0.327393	0.115	0.346	3.31e-15	0	PIK3R5	rods
MYOF	1.46e-11	-0.327445	0.418	0.6	2.87e-07	0	MYOF	rods
RAB11FIP3	1.43e-13	-0.327509	0.632	0.784	2.81e-09	0	RAB11FIP3	rods
PDE1B	2.77e-14	-0.32762	0.282	0.492	5.44e-10	0	PDE1B	rods
ZHX2	4.51e-13	-0.327826	0.926	0.957	8.85e-09	0	ZHX2	rods
NECAB1	7.57e-14	-0.328018	0.248	0.441	1.48e-09	0	NECAB1	rods
SLC30A10	1.11e-14	-0.328098	0.363	0.577	2.17e-10	0	SLC30A10	rods
LEF1	3.1e-15	-0.328303	0.413	0.624	6.07e-11	0	LEF1	rods
IL7	1.43e-15	-0.328955	0.131	0.325	2.81e-11	0	IL7	rods
FREM1	1.77e-13	-0.329085	0.348	0.549	3.48e-09	0	FREM1	rods
PLEKHG1	8.97e-09	-0.329464	0.874	0.898	0.000175784	0	PLEKHG1	rods
RAB33A	4.31e-17	-0.32957	0.138	0.35	8.46e-13	0	RAB33A	rods
DOCK4	2.61e-17	-0.32976	0.853	0.94	5.11e-13	0	DOCK4	rods
SOHLH2	3.24e-20	-0.330057	0.029	0.218	6.36e-16	0	SOHLH2	rods
GLIPR2	5.7e-14	-0.330129	0.26	0.464	1.12e-09	0	GLIPR2	rods
TMEM55A	4.48e-17	-0.330175	0.142	0.353	8.79e-13	0	TMEM55A	rods
CAPN8	8.72e-21	-0.330366	0.059	0.273	1.71e-16	0	CAPN8	rods
PRRX2	3e-13	-0.330519	0.223	0.422	5.89e-09	0	PRRX2	rods
LRRC1	7.33e-14	-0.330638	0.524	0.717	1.44e-09	0	LRRC1	rods
METTL24	1.52e-14	-0.330679	0.357	0.567	2.98e-10	0	METTL24	rods
RBM19	4.69e-11	-0.330804	0.621	0.745	9.19e-07	0	RBM19	rods
SVEP1	4.21e-18	-0.331038	0.135	0.358	8.26e-14	0	SVEP1	rods
SLC24A2	8.93e-13	-0.332036	0.388	0.58	1.75e-08	0	SLC24A2	rods
KCNQ1	2.48e-20	-0.332253	0.968	0.986	4.87e-16	0	KCNQ1	rods
SORBS3	7.11e-11	-0.332387	0.535	0.709	1.39e-06	0	SORBS3	rods
GCK	1.6e-10	-0.332572	0.508	0.655	3.14e-06	0	GCK	rods
ORAI3	2.3e-14	-0.332587	0.291	0.498	4.52e-10	0	ORAI3	rods
SPECC1	2.12e-14	-0.332666	0.693	0.836	4.17e-10	0	SPECC1	rods
RASEF	7.87e-19	-0.333177	0.074	0.279	1.54e-14	0	RASEF	rods
RARB	2.33e-12	-0.333275	0.815	0.886	4.56e-08	0	RARB	rods
WT1	3.83e-15	-0.333369	0.255	0.477	7.51e-11	0	WT1	rods
EFNA1	3.52e-12	-0.333454	0.226	0.408	6.91e-08	0	EFNA1	rods
LRP1	9.59e-11	-0.333616	0.609	0.76	1.88e-06	0	LRP1	rods
LAMB4	3.07e-15	-0.333783	0.158	0.358	6.02e-11	0	LAMB4	rods
VTI1A	3.18e-14	-0.334025	0.754	0.859	6.24e-10	0	VTI1A	rods
ETV4	3.31e-14	-0.334032	0.424	0.635	6.49e-10	0	ETV4	rods
FGF19	9.2e-15	-0.334398	0.212	0.414	1.8e-10	0	FGF19	rods
DAPK2	1.25e-14	-0.334637	0.476	0.669	2.44e-10	0	DAPK2	rods
KCNC1	3.3e-12	-0.334919	0.438	0.619	6.47e-08	0	KCNC1	rods
COL5A3	2.08e-16	-0.335002	0.099	0.29	4.08e-12	0	COL5A3	rods
SLC32A1	1.98e-10	-0.335141	0.275	0.445	3.89e-06	0	SLC32A1	rods
MME	4.09e-20	-0.335257	0.133	0.366	8.01e-16	0	MME	rods
IGF1	1.9e-17	-0.335359	0.07	0.259	3.72e-13	0	IGF1	rods
ADORA2B	6.85e-12	-0.33541	0.436	0.608	1.34e-07	0	ADORA2B	rods
ABLIM2	5.37e-17	-0.335505	0.894	0.943	1.05e-12	0	ABLIM2	rods
RP5-1052I5.2	2.09e-10	-0.335523	0.494	0.647	4.09e-06	0	RP5-1052I5.2	rods
DTX1	4.66e-15	-0.335612	0.316	0.539	9.14e-11	0	DTX1	rods
OPRD1	1.54e-10	-0.335629	0.345	0.51	3.02e-06	0	OPRD1	rods
ENPP2	8.35e-19	-0.335638	0.19	0.428	1.64e-14	0	ENPP2	rods
OLFM3	7.45e-14	-0.335648	0.278	0.482	1.46e-09	0	OLFM3	rods
MGST1	6.24e-14	-0.335822	0.44	0.655	1.22e-09	0	MGST1	rods
IQCA1	6.98e-14	-0.335954	0.391	0.58	1.37e-09	0	IQCA1	rods
SLC5A10	1.03e-12	-0.336326	0.391	0.587	2.03e-08	0	SLC5A10	rods
RGS20	1.29e-12	-0.336438	0.537	0.724	2.53e-08	0	RGS20	rods
ADAMTSL2	1.68e-13	-0.336441	0.352	0.557	3.29e-09	0	ADAMTSL2	rods
SHISA4	1.46e-14	-0.33704	0.201	0.4	2.85e-10	0	SHISA4	rods
ITPR1	9.19e-16	-0.337489	0.652	0.808	1.8e-11	0	ITPR1	rods
ST6GAL1	3.2e-15	-0.337491	0.325	0.545	6.28e-11	0	ST6GAL1	rods
OTOG	1.88e-16	-0.337537	0.19	0.409	3.68e-12	0	OTOG	rods
SLC39A11	1.96e-17	-0.337591	0.822	0.911	3.84e-13	0	SLC39A11	rods
CLDN11	4.11e-13	-0.337603	0.7	0.822	8.06e-09	0	CLDN11	rods
DFNA5	8.34e-14	-0.337604	0.327	0.532	1.63e-09	0	DFNA5	rods
CLVS1	5.32e-14	-0.337663	0.781	0.875	1.04e-09	0	CLVS1	rods
GPA33	1.4e-11	-0.338223	0.456	0.64	2.75e-07	0	GPA33	rods
SEC16B	7.57e-12	-0.338336	0.221	0.387	1.48e-07	0	SEC16B	rods
LAMC3	1.58e-14	-0.338398	0.332	0.526	3.11e-10	0	LAMC3	rods
GALNT15	8.73e-17	-0.338402	0.113	0.31	1.71e-12	0	GALNT15	rods
EPSTI1	1.4e-20	-0.338433	0.106	0.335	2.74e-16	0	EPSTI1	rods
SLIT1	3.95e-16	-0.338835	0.898	0.94	7.75e-12	0	SLIT1	rods
MAN1A1	2.57e-12	-0.338846	0.6	0.757	5.04e-08	0	MAN1A1	rods
LMF1	5.62e-16	-0.338896	0.756	0.881	1.1e-11	0	LMF1	rods
CTNND1	1.22e-13	-0.339288	0.381	0.59	2.4e-09	0	CTNND1	rods
GRIN1	4.26e-11	-0.3394	0.275	0.438	8.35e-07	0	GRIN1	rods
ZNF608	1.84e-15	-0.339581	0.828	0.923	3.61e-11	0	ZNF608	rods
NTRK1	4.4e-11	-0.339707	0.612	0.746	8.63e-07	0	NTRK1	rods
PIK3C2B	1.14e-12	-0.339861	0.722	0.828	2.23e-08	0	PIK3C2B	rods
NID1	2.7e-09	-0.33989	0.42	0.568	5.3e-05	0	NID1	rods
TACR1	5.15e-16	-0.340373	0.178	0.384	1.01e-11	0	TACR1	rods
MUC3A	8.84e-15	-0.340555	0.194	0.395	1.73e-10	0	MUC3A	rods
VIM	8.19e-12	-0.340686	0.363	0.542	1.61e-07	0	VIM	rods
DAGLA	7.07e-15	-0.340804	0.609	0.79	1.39e-10	0	DAGLA	rods
GATB	4.89e-11	-0.34081	0.754	0.851	9.59e-07	0	GATB	rods
THBS1	6.11e-18	-0.340816	0.041	0.218	1.2e-13	0	THBS1	rods
USP43	5.2e-13	-0.341072	0.323	0.517	1.02e-08	0	USP43	rods
DLGAP3	4.72e-14	-0.341073	0.456	0.653	9.25e-10	0	DLGAP3	rods
IRS1	6.51e-13	-0.341217	0.774	0.873	1.28e-08	0	IRS1	rods
ARPP21	2.48e-12	-0.341556	0.492	0.67	4.87e-08	0	ARPP21	rods
C6orf222	1.33e-16	-0.341656	0.102	0.297	2.61e-12	0	C6orf222	rods
LHX9	2.96e-11	-0.341701	0.481	0.65	5.8e-07	0	LHX9	rods
LAMC1	2.18e-13	-0.341753	0.476	0.655	4.26e-09	0	LAMC1	rods
C12orf40	1.19e-17	-0.341762	0.124	0.335	2.33e-13	0	C12orf40	rods
FEZF2	1.81e-14	-0.341902	0.248	0.452	3.56e-10	0	FEZF2	rods
WNT9B	8.97e-16	-0.342042	0.199	0.411	1.76e-11	0	WNT9B	rods
DIP2C	7.82e-19	-0.342087	0.957	0.978	1.53e-14	0	DIP2C	rods
BACE2	1.2e-24	-0.342746	0.194	0.472	2.35e-20	0	BACE2	rods
LAMB3	1.41e-18	-0.342987	0.12	0.34	2.77e-14	0	LAMB3	rods
SPHK1	1.09e-12	-0.343126	0.339	0.535	2.14e-08	0	SPHK1	rods
KIF16B	2.14e-13	-0.343136	0.596	0.77	4.19e-09	0	KIF16B	rods
SH3RF1	1.27e-13	-0.343197	0.589	0.753	2.48e-09	0	SH3RF1	rods
C12orf56	1.3e-14	-0.343625	0.242	0.447	2.55e-10	0	C12orf56	rods
FGF18	9.42e-13	-0.344231	0.388	0.59	1.85e-08	0	FGF18	rods
SIAH3	2.52e-13	-0.344445	0.291	0.477	4.94e-09	0	SIAH3	rods
TTLL10	1.68e-21	-0.344674	0.047	0.259	3.29e-17	0	TTLL10	rods
ZC3HAV1	4.81e-13	-0.344758	0.223	0.411	9.44e-09	0	ZC3HAV1	rods
PPP1R1C	1.9e-15	-0.344786	0.178	0.385	3.72e-11	0	PPP1R1C	rods
AFAP1	2.41e-15	-0.344855	0.831	0.908	4.73e-11	0	AFAP1	rods
KBTBD11	5.19e-13	-0.344878	0.54	0.721	1.02e-08	0	KBTBD11	rods
TNNI3K	2.17e-13	-0.345004	0.381	0.585	4.25e-09	0	TNNI3K	rods
PCGF2	1.85e-15	-0.345178	0.354	0.579	3.63e-11	0	PCGF2	rods
EXD3	4.19e-16	-0.345409	0.837	0.905	8.21e-12	0	EXD3	rods
NHLH2	9.07e-18	-0.345635	0.129	0.335	1.78e-13	0	NHLH2	rods
KCNT1	5.03e-14	-0.345658	0.384	0.58	9.85e-10	0	KCNT1	rods
RP11-691N7.6	1.1e-13	-0.345723	0.512	0.708	2.15e-09	0	RP11-691N7.6	rods
SLC9A2	1.72e-17	-0.345728	0.113	0.321	3.37e-13	0	SLC9A2	rods
VPS13D	8.88e-12	-0.345944	0.582	0.743	1.74e-07	0	VPS13D	rods
PAK3	3.16e-15	-0.346076	0.58	0.76	6.19e-11	0	PAK3	rods
PTPRQ	1.66e-18	-0.3461	0.19	0.429	3.25e-14	0	PTPRQ	rods
C1orf94	3.81e-16	-0.346287	0.257	0.486	7.46e-12	0	C1orf94	rods
POU3F2	1.23e-11	-0.346816	0.456	0.629	2.42e-07	0	POU3F2	rods
KIAA1549L	1.78e-17	-0.347126	0.124	0.337	3.5e-13	0	KIAA1549L	rods
ALDH1A1	1.14e-17	-0.347302	0.178	0.398	2.23e-13	0	ALDH1A1	rods
C15orf52	3.36e-15	-0.347663	0.21	0.41	6.58e-11	0	C15orf52	rods
WIPF1	2.71e-14	-0.348218	0.305	0.506	5.32e-10	0	WIPF1	rods
TGM2	6.04e-16	-0.34828	0.16	0.367	1.19e-11	0	TGM2	rods
NKAIN4	1.6e-12	-0.348293	0.501	0.693	3.13e-08	0	NKAIN4	rods
STK10	6.26e-14	-0.348359	0.537	0.721	1.23e-09	0	STK10	rods
SERINC2	2.07e-14	-0.348471	0.253	0.45	4.05e-10	0	SERINC2	rods
PRICKLE1	2.46e-13	-0.348586	0.454	0.644	4.82e-09	0	PRICKLE1	rods
VGLL3	1.21e-16	-0.348991	0.217	0.45	2.37e-12	0	VGLL3	rods
LMNA	6.28e-10	-0.349183	0.799	0.858	1.23e-05	0	LMNA	rods
BEGAIN	3.13e-14	-0.349427	0.413	0.621	6.14e-10	0	BEGAIN	rods
HCRTR2	2.67e-20	-0.349575	0.086	0.309	5.23e-16	0	HCRTR2	rods
KCTD1	4.63e-15	-0.350274	0.688	0.841	9.07e-11	0	KCTD1	rods
SERP2	2.78e-15	-0.350491	0.266	0.473	5.44e-11	0	SERP2	rods
SLC7A11	1.82e-21	-0.350978	0.167	0.431	3.56e-17	0	SLC7A11	rods
BEAN1	1.46e-15	-0.351378	0.291	0.513	2.85e-11	0	BEAN1	rods
COLQ	2.27e-17	-0.35143	0.12	0.323	4.45e-13	0	COLQ	rods
TNFRSF21	2.45e-16	-0.351809	0.368	0.608	4.81e-12	0	TNFRSF21	rods
CLDN12	3.66e-15	-0.351844	0.284	0.502	7.18e-11	0	CLDN12	rods
BACH2	1.59e-16	-0.351876	0.923	0.966	3.12e-12	0	BACH2	rods
GABRB1	1.48e-13	-0.352205	0.422	0.627	2.9e-09	0	GABRB1	rods
RAPGEF4	3.62e-13	-0.352454	0.553	0.725	7.1e-09	0	RAPGEF4	rods
RP5-877J2.1	1.33e-14	-0.352823	0.474	0.664	2.6e-10	0	RP5-877J2.1	rods
CACNA1I	1.03e-11	-0.352936	0.537	0.696	2.01e-07	0	CACNA1I	rods
TTC29	1.84e-14	-0.353207	0.372	0.586	3.6e-10	0	TTC29	rods
TRIM5	9.15e-20	-0.353336	0.111	0.335	1.79e-15	0	TRIM5	rods
SPSB4	3.21e-16	-0.353356	0.738	0.857	6.3e-12	0	SPSB4	rods
THBS2	1.29e-21	-0.353664	0.045	0.253	2.53e-17	0	THBS2	rods
RAB37	8.19e-17	-0.354953	0.242	0.46	1.6e-12	0	RAB37	rods
FAM134B	2.9e-15	-0.355011	0.402	0.622	5.68e-11	0	FAM134B	rods
CPA2	9.02e-17	-0.355085	0.169	0.376	1.77e-12	0	CPA2	rods
SLC9A3	3.31e-14	-0.355171	0.418	0.616	6.5e-10	0	SLC9A3	rods
PAK5	1.57e-14	-0.355431	0.628	0.795	3.07e-10	0	PAK5	rods
CRYL1	9.48e-13	-0.355521	0.402	0.584	1.86e-08	0	CRYL1	rods
ADTRP	2.5e-21	-0.35571	0.104	0.337	4.91e-17	0	ADTRP	rods
PLEKHG4B	3.58e-14	-0.355846	0.336	0.54	7.01e-10	0	PLEKHG4B	rods
PCDH7	2.32e-15	-0.355973	0.749	0.869	4.56e-11	0	PCDH7	rods
GABRB2	7.83e-16	-0.35598	0.282	0.504	1.54e-11	0	GABRB2	rods
PTPN5	1.24e-17	-0.356167	0.149	0.367	2.44e-13	0	PTPN5	rods
TUNAR	1.38e-15	-0.356817	0.278	0.495	2.71e-11	0	TUNAR	rods
GRIP2	2.7e-11	-0.356999	0.4	0.573	5.3e-07	0	GRIP2	rods
MTCL1	2.29e-15	-0.357244	0.693	0.858	4.5e-11	0	MTCL1	rods
SLC4A4	4.18e-18	-0.357626	0.488	0.708	8.2e-14	0	SLC4A4	rods
CD247	2.23e-14	-0.357634	0.535	0.716	4.38e-10	0	CD247	rods
GAS6	1.15e-13	-0.357762	0.422	0.622	2.25e-09	0	GAS6	rods
GRIP1	5.22e-15	-0.358009	0.736	0.868	1.02e-10	0	GRIP1	rods
TBC1D22A	8.45e-17	-0.358062	0.905	0.94	1.66e-12	0	TBC1D22A	rods
NOVA1	5.35e-13	-0.358412	0.479	0.655	1.05e-08	0	NOVA1	rods
SLCO2B1	3.84e-17	-0.358549	0.147	0.358	7.54e-13	0	SLCO2B1	rods
KRT80	4.56e-18	-0.358637	0.108	0.313	8.93e-14	0	KRT80	rods
AGMO	2.6e-17	-0.359008	0.163	0.378	5.09e-13	0	AGMO	rods
HTR2C	6.94e-22	-0.359063	0.063	0.288	1.36e-17	0	HTR2C	rods
FAR2	9.56e-11	-0.359082	0.309	0.488	1.87e-06	0	FAR2	rods
C9orf92	1.4e-20	-0.359141	0.163	0.41	2.75e-16	0	C9orf92	rods
MYO1H	2.36e-13	-0.359204	0.381	0.568	4.62e-09	0	MYO1H	rods
PLCB4	4.52e-15	-0.359441	0.693	0.849	8.85e-11	0	PLCB4	rods
RUNX2	2.95e-14	-0.359553	0.688	0.832	5.77e-10	0	RUNX2	rods
CLDN14	4.36e-18	-0.359763	0.111	0.319	8.55e-14	0	CLDN14	rods
CACHD1	4.59e-15	-0.359785	0.598	0.784	9.01e-11	0	CACHD1	rods
WNT2	1.15e-19	-0.360243	0.068	0.271	2.26e-15	0	WNT2	rods
ACTN4	1.3e-08	-0.360251	0.786	0.848	0.000254943	0	ACTN4	rods
IL7R	4.02e-22	-0.360629	0.007	0.194	7.88e-18	0	IL7R	rods
KCNK1	4.35e-17	-0.360705	0.126	0.328	8.52e-13	0	KCNK1	rods
NR2E1	3.42e-10	-0.360751	0.456	0.623	6.71e-06	0	NR2E1	rods
ACOT7	9.53e-16	-0.360917	0.745	0.852	1.87e-11	0	ACOT7	rods
IL15RA	1.49e-19	-0.361088	0.104	0.319	2.92e-15	0	IL15RA	rods
CPNE8	8.56e-15	-0.36115	0.237	0.449	1.68e-10	0	CPNE8	rods
HSD17B2	4.24e-16	-0.361226	0.138	0.339	8.32e-12	0	HSD17B2	rods
CNOT10	1.88e-13	-0.361422	0.485	0.662	3.68e-09	0	CNOT10	rods
GLI3	9.37e-15	-0.361535	0.887	0.935	1.84e-10	0	GLI3	rods
NFASC	8.96e-17	-0.361547	0.828	0.915	1.76e-12	0	NFASC	rods
MSR1	7.96e-17	-0.361637	0.266	0.487	1.56e-12	0	MSR1	rods
FRMD5	1.47e-07	-0.361948	0.682	0.759	0.00287307	0	FRMD5	rods
BCAR3	2.28e-17	-0.362851	0.887	0.947	4.46e-13	0	BCAR3	rods
COL25A1	2.7e-13	-0.362901	0.786	0.867	5.3e-09	0	COL25A1	rods
PCDHGC5	1.55e-15	-0.362937	0.314	0.535	3.04e-11	0	PCDHGC5	rods
EFNB2	1.86e-11	-0.362982	0.716	0.828	3.65e-07	0	EFNB2	rods
SNTB1	5.03e-17	-0.363622	0.323	0.552	9.86e-13	0	SNTB1	rods
TNFRSF8	5.41e-19	-0.363833	0.097	0.31	1.06e-14	0	TNFRSF8	rods
COL9A3	1.51e-13	-0.363836	0.341	0.541	2.96e-09	0	COL9A3	rods
PCDH19	1.14e-13	-0.363875	0.546	0.743	2.24e-09	0	PCDH19	rods
TOX	1.31e-14	-0.36479	0.889	0.946	2.57e-10	0	TOX	rods
CFAP46	3.57e-12	-0.365045	0.506	0.685	7e-08	0	CFAP46	rods
KCNH1	1.36e-14	-0.365192	0.512	0.692	2.66e-10	0	KCNH1	rods
TGIF1	5.46e-15	-0.365214	0.451	0.655	1.07e-10	0	TGIF1	rods
TRAF3IP2	4.79e-17	-0.365249	0.302	0.546	9.4e-13	0	TRAF3IP2	rods
SERTM1	3.38e-22	-0.365451	0.079	0.306	6.62e-18	0	SERTM1	rods
HPCAL1	2.1e-15	-0.365602	0.878	0.933	4.13e-11	0	HPCAL1	rods
LIPG	1.02e-13	-0.365718	0.327	0.535	2e-09	0	LIPG	rods
VAC14	9.53e-18	-0.365947	0.731	0.878	1.87e-13	0	VAC14	rods
KIAA0922	2.3e-17	-0.366052	0.537	0.77	4.51e-13	0	KIAA0922	rods
NRG2	7.96e-17	-0.366401	0.752	0.882	1.56e-12	0	NRG2	rods
B3GALT5	4.42e-16	-0.366489	0.255	0.471	8.67e-12	0	B3GALT5	rods
ERG	1.86e-17	-0.366559	0.393	0.637	3.65e-13	0	ERG	rods
ST7	1.11e-17	-0.366583	0.655	0.829	2.18e-13	0	ST7	rods
CACNA1B	2.47e-13	-0.366989	0.569	0.737	4.83e-09	0	CACNA1B	rods
HOMER2	7.4e-17	-0.367462	0.646	0.816	1.45e-12	0	HOMER2	rods
MDS2	3.91e-17	-0.367654	0.203	0.425	7.67e-13	0	MDS2	rods
CCDC136	1.25e-16	-0.367806	0.201	0.416	2.46e-12	0	CCDC136	rods
YPEL4	6.2e-20	-0.367842	0.111	0.335	1.22e-15	0	YPEL4	rods
GLP1R	1.02e-18	-0.368084	0.156	0.38	2e-14	0	GLP1R	rods
VWA8	3.53e-14	-0.368227	0.497	0.684	6.92e-10	0	VWA8	rods
CAPN13	7.04e-18	-0.368312	0.102	0.306	1.38e-13	0	CAPN13	rods
FAM13C	1.01e-14	-0.368327	0.463	0.65	1.97e-10	0	FAM13C	rods
GLRA2	9.69e-22	-0.368335	0.065	0.287	1.9e-17	0	GLRA2	rods
TG	5.74e-13	-0.368465	0.619	0.753	1.13e-08	0	TG	rods
SH3TC2	1.35e-14	-0.368534	0.318	0.52	2.64e-10	0	SH3TC2	rods
ETS1	2.82e-14	-0.368798	0.46	0.65	5.54e-10	0	ETS1	rods
WSCD2	8.86e-16	-0.368842	0.255	0.466	1.74e-11	0	WSCD2	rods
UPK2	2.53e-17	-0.369206	0.641	0.8	4.97e-13	0	UPK2	rods
MLLT3	4.1e-15	-0.36947	0.571	0.761	8.03e-11	0	MLLT3	rods
PCDH17	3.28e-14	-0.369502	0.463	0.661	6.44e-10	0	PCDH17	rods
IGFBP5	4.75e-20	-0.369532	0.3	0.566	9.31e-16	0	IGFBP5	rods
SLC6A11	3.24e-13	-0.369639	0.449	0.646	6.35e-09	0	SLC6A11	rods
NCAM1	9.15e-21	-0.369829	0.948	0.976	1.79e-16	0	NCAM1	rods
TRIM16	1.04e-18	-0.369927	0.156	0.382	2.03e-14	0	TRIM16	rods
KIAA2012	7.33e-16	-0.369962	0.388	0.609	1.44e-11	0	KIAA2012	rods
CRACR2A	4.78e-12	-0.36999	0.598	0.73	9.38e-08	0	CRACR2A	rods
SCNN1B	1.64e-22	-0.370338	0.054	0.274	3.22e-18	0	SCNN1B	rods
JAKMIP1	3.39e-15	-0.370861	0.655	0.787	6.64e-11	0	JAKMIP1	rods
KIAA2012.1	7.36e-16	-0.371077	0.379	0.6	1.44e-11	0	KIAA2012.1	rods
GLI2	3.28e-22	-0.371082	0.946	0.979	6.44e-18	0	GLI2	rods
JDP2	3.95e-12	-0.371792	0.431	0.623	7.74e-08	0	JDP2	rods
COL14A1	2.03e-16	-0.371962	0.28	0.507	3.98e-12	0	COL14A1	rods
SORL1	2.97e-16	-0.372044	0.54	0.728	5.83e-12	0	SORL1	rods
LRRN3	7.06e-18	-0.372208	0.151	0.367	1.38e-13	0	LRRN3	rods
PTPN14	3.27e-20	-0.373161	0.447	0.692	6.41e-16	0	PTPN14	rods
TNC	3.81e-19	-0.373525	0.144	0.376	7.48e-15	0	TNC	rods
DCX	6.43e-21	-0.373564	0.111	0.342	1.26e-16	0	DCX	rods
RNF180	2.22e-16	-0.373747	0.388	0.607	4.36e-12	0	RNF180	rods
ZNF521	4.19e-15	-0.374122	0.763	0.868	8.22e-11	0	ZNF521	rods
AMZ1	1.34e-13	-0.374661	0.445	0.633	2.62e-09	0	AMZ1	rods
SH2D6	1.6e-14	-0.37478	0.451	0.644	3.13e-10	0	SH2D6	rods
TNS1	9.51e-22	-0.374882	0.885	0.937	1.86e-17	0	TNS1	rods
PIEZO2	6.6e-18	-0.37505	0.384	0.629	1.29e-13	0	PIEZO2	rods
STEAP1B	3.04e-16	-0.37528	0.379	0.609	5.96e-12	0	STEAP1B	rods
CDH8	5.12e-16	-0.375368	0.248	0.467	1e-11	0	CDH8	rods
SCD5	9.71e-19	-0.376132	0.758	0.874	1.9e-14	0	SCD5	rods
GLDN	1.65e-18	-0.376368	0.165	0.386	3.23e-14	0	GLDN	rods
TNFRSF1B	1.7e-16	-0.37711	0.237	0.458	3.33e-12	0	TNFRSF1B	rods
IL34	7.62e-19	-0.377303	0.176	0.41	1.49e-14	0	IL34	rods
USH1C	2.76e-17	-0.37743	0.287	0.52	5.41e-13	0	USH1C	rods
SPEF2	6.53e-18	-0.377855	0.242	0.479	1.28e-13	0	SPEF2	rods
LTBP4	5.65e-17	-0.377884	0.463	0.674	1.11e-12	0	LTBP4	rods
MASP1	9.32e-19	-0.377903	0.09	0.295	1.83e-14	0	MASP1	rods
NTF3	7.68e-17	-0.377991	0.409	0.64	1.5e-12	0	NTF3	rods
RP11-249L12.1	9.11e-21	-0.378158	0.056	0.26	1.79e-16	0	RP11-249L12.1	rods
RNLS	1.3e-15	-0.379143	0.411	0.621	2.55e-11	0	RNLS	rods
TPCN2	4.3e-15	-0.37919	0.716	0.839	8.43e-11	0	TPCN2	rods
PLCE1	2.32e-17	-0.379352	0.273	0.501	4.56e-13	0	PLCE1	rods
RAB7B	3.19e-19	-0.379367	0.122	0.341	6.26e-15	0	RAB7B	rods
COX19	4.92e-15	-0.379394	0.573	0.773	9.64e-11	0	COX19	rods
DNAH2	2.08e-16	-0.379753	0.497	0.687	4.09e-12	0	DNAH2	rods
GYPC	7.87e-19	-0.380144	0.102	0.315	1.54e-14	0	GYPC	rods
PREX2	7.49e-17	-0.380575	0.47	0.695	1.47e-12	0	PREX2	rods
OSTM1	1.03e-13	-0.380822	0.817	0.899	2.02e-09	0	OSTM1	rods
SULF1	1.75e-13	-0.381107	0.526	0.71	3.43e-09	0	SULF1	rods
HSPA12A	1.77e-20	-0.381132	0.842	0.92	3.46e-16	0	HSPA12A	rods
PTH2R	1.5e-16	-0.381312	0.666	0.824	2.94e-12	0	PTH2R	rods
FUT9	3.74e-17	-0.381508	0.393	0.625	7.33e-13	0	FUT9	rods
LAMA4	1.34e-17	-0.381664	0.273	0.5	2.62e-13	0	LAMA4	rods
DRD2	1.2e-14	-0.382016	0.318	0.512	2.35e-10	0	DRD2	rods
COL18A1	1.47e-16	-0.382043	0.842	0.908	2.88e-12	0	COL18A1	rods
LRTM2	1.5e-18	-0.382215	0.163	0.388	2.94e-14	0	LRTM2	rods
STAB2	6.41e-23	-0.382304	0.104	0.348	1.26e-18	0	STAB2	rods
DPF1	3.15e-17	-0.382413	0.386	0.604	6.18e-13	0	DPF1	rods
PCDHGB4	1.67e-16	-0.38267	0.655	0.799	3.28e-12	0	PCDHGB4	rods
GDNF	1.14e-18	-0.382791	0.192	0.426	2.23e-14	0	GDNF	rods
CRYM	4.8e-17	-0.382822	0.336	0.572	9.4e-13	0	CRYM	rods
STX18	2.32e-16	-0.382894	0.6	0.77	4.54e-12	0	STX18	rods
DACH1	1.72e-16	-0.382904	0.905	0.965	3.37e-12	0	DACH1	rods
RUBCNL	3.12e-22	-0.38304	0.077	0.305	6.12e-18	0	RUBCNL	rods
COL26A1	1.29e-14	-0.383283	0.492	0.669	2.52e-10	0	COL26A1	rods
TTLL11	1.45e-21	-0.383805	0.831	0.91	2.83e-17	0	TTLL11	rods
CACNG3	5.53e-20	-0.383917	0.086	0.299	1.08e-15	0	CACNG3	rods
LMTK3	1.7e-15	-0.384227	0.47	0.666	3.34e-11	0	LMTK3	rods
SLC18A2	1.01e-16	-0.384313	0.176	0.388	1.97e-12	0	SLC18A2	rods
PHGDH	1.49e-16	-0.384716	0.33	0.557	2.92e-12	0	PHGDH	rods
GABRA2	2.38e-17	-0.384899	0.262	0.495	4.67e-13	0	GABRA2	rods
PCDHGA7	8.47e-17	-0.384904	0.655	0.802	1.66e-12	0	PCDHGA7	rods
BTBD11	1.19e-16	-0.385443	0.747	0.876	2.33e-12	0	BTBD11	rods
BEST1	1.67e-20	-0.385544	0.147	0.39	3.28e-16	0	BEST1	rods
NEDD9	1.01e-16	-0.386086	0.641	0.816	1.98e-12	0	NEDD9	rods
ADGRA1	2.7e-15	-0.386165	0.503	0.688	5.28e-11	0	ADGRA1	rods
TNFAIP8	1.02e-16	-0.386537	0.424	0.644	2.01e-12	0	TNFAIP8	rods
SLC26A7	7.7e-17	-0.386822	0.266	0.481	1.51e-12	0	SLC26A7	rods
RP11-12J10.3	2.71e-20	-0.386988	0.81	0.902	5.3e-16	0	RP11-12J10.3	rods
PCDHGA8	5.03e-17	-0.38699	0.65	0.798	9.86e-13	0	PCDHGA8	rods
PALLD	2.19e-18	-0.387047	0.889	0.943	4.3e-14	0	PALLD	rods
GALNT16	5.33e-18	-0.387759	0.332	0.571	1.05e-13	0	GALNT16	rods
OPHN1	3.22e-17	-0.388076	0.278	0.524	6.32e-13	0	OPHN1	rods
RAPGEF5	4.39e-17	-0.388279	0.476	0.686	8.61e-13	0	RAPGEF5	rods
NRAP	6.89e-21	-0.388413	0.099	0.323	1.35e-16	0	NRAP	rods
PCDHGB5	4.21e-17	-0.388535	0.648	0.797	8.26e-13	0	PCDHGB5	rods
SCHIP1.1	3.58e-16	-0.388663	0.479	0.692	7.03e-12	0	SCHIP1.1	rods
PCDHGA6	2.67e-17	-0.388949	0.657	0.805	5.23e-13	0	PCDHGA6	rods
FBN2	1.45e-14	-0.388992	0.526	0.71	2.84e-10	0	FBN2	rods
DNAH7	1.27e-16	-0.389001	0.336	0.553	2.5e-12	0	DNAH7	rods
PCYT1B	1.74e-15	-0.389055	0.318	0.537	3.41e-11	0	PCYT1B	rods
PDGFB	1.48e-16	-0.38914	0.28	0.505	2.9e-12	0	PDGFB	rods
SYNPO	1.35e-14	-0.389209	0.515	0.689	2.64e-10	0	SYNPO	rods
DIO2	1.57e-22	-0.38931	0.063	0.287	3.07e-18	0	DIO2	rods
CD5	7.52e-20	-0.38939	0.158	0.395	1.47e-15	0	CD5	rods
DUSP6	9.53e-18	-0.390132	0.372	0.608	1.87e-13	0	DUSP6	rods
RGS7BP	1.21e-18	-0.390533	0.212	0.457	2.38e-14	0	RGS7BP	rods
MYRFL	1.49e-17	-0.390599	0.233	0.452	2.91e-13	0	MYRFL	rods
SDC1	4.03e-18	-0.390634	0.262	0.506	7.91e-14	0	SDC1	rods
PKD1L1	1.22e-19	-0.390706	0.214	0.463	2.4e-15	0	PKD1L1	rods
ATOH8	4.03e-17	-0.391053	0.603	0.782	7.9e-13	0	ATOH8	rods
LRRK1	5.12e-17	-0.391176	0.659	0.819	1e-12	0	LRRK1	rods
CYP19A1	2.19e-21	-0.391325	0.185	0.433	4.29e-17	0	CYP19A1	rods
GPR158	9.39e-18	-0.391445	0.454	0.675	1.84e-13	0	GPR158	rods
SLC16A14	1.7e-19	-0.391458	0.187	0.424	3.34e-15	0	SLC16A14	rods
TMEM179	1.04e-18	-0.391866	0.824	0.905	2.04e-14	0	TMEM179	rods
ARHGAP44	1.77e-15	-0.392229	0.406	0.609	3.47e-11	0	ARHGAP44	rods
ADAP1	5.26e-17	-0.392359	0.35	0.591	1.03e-12	0	ADAP1	rods
PLEKHO1	3.12e-15	-0.392933	0.422	0.639	6.11e-11	0	PLEKHO1	rods
STMN4	1.09e-20	-0.392942	0.045	0.243	2.13e-16	0	STMN4	rods
SYT16	1.57e-14	-0.392988	0.438	0.634	3.07e-10	0	SYT16	rods
CRABP1	1.09e-16	-0.3933	0.28	0.497	2.13e-12	0	CRABP1	rods
PCDHGB6	2.62e-17	-0.393374	0.637	0.789	5.14e-13	0	PCDHGB6	rods
MDK	4.04e-19	-0.393411	0.223	0.46	7.92e-15	0	MDK	rods
OLFML3	6.01e-17	-0.393557	0.228	0.449	1.18e-12	0	OLFML3	rods
PCDHGA9	4.77e-17	-0.394612	0.643	0.792	9.35e-13	0	PCDHGA9	rods
KCNN2	1.51e-14	-0.395173	0.375	0.586	2.97e-10	0	KCNN2	rods
PCTP	1.53e-21	-0.395177	0.187	0.451	2.99e-17	0	PCTP	rods
PCDHGB3	5.91e-18	-0.395494	0.657	0.808	1.16e-13	0	PCDHGB3	rods
TRIM29	9.14e-17	-0.395599	0.42	0.63	1.79e-12	0	TRIM29	rods
SSPO	2.23e-19	-0.395765	0.284	0.537	4.38e-15	0	SSPO	rods
ME1	1.3e-17	-0.396341	0.339	0.562	2.55e-13	0	ME1	rods
PCDHGA2	2.13e-18	-0.396437	0.677	0.826	4.17e-14	0	PCDHGA2	rods
JPH4	2.06e-18	-0.396565	0.153	0.372	4.03e-14	0	JPH4	rods
CPNE2	1.95e-17	-0.397726	0.393	0.615	3.82e-13	0	CPNE2	rods
PCDHGC3	2.65e-16	-0.397802	0.551	0.724	5.2e-12	0	PCDHGC3	rods
CA12	1.1e-18	-0.398709	0.183	0.412	2.16e-14	0	CA12	rods
TMEM104	1.22e-16	-0.398878	0.621	0.787	2.4e-12	0	TMEM104	rods
PCDHGA1	1.32e-18	-0.399287	0.682	0.829	2.6e-14	0	PCDHGA1	rods
SLC1A1	9.44e-18	-0.399533	0.214	0.448	1.85e-13	0	SLC1A1	rods
ZNF365	8.93e-19	-0.399899	0.334	0.57	1.75e-14	0	ZNF365	rods
ESR1	3.58e-18	-0.400014	0.404	0.645	7.01e-14	0	ESR1	rods
CTB-127M13.1	1.89e-17	-0.40008	0.187	0.406	3.7e-13	0	CTB-127M13.1	rods
FAM65B	2.24e-17	-0.400247	0.555	0.746	4.39e-13	0	FAM65B	rods
PALD1	1.15e-19	-0.400809	0.454	0.679	2.26e-15	0	PALD1	rods
PCDHGB2	1.25e-18	-0.400969	0.661	0.814	2.45e-14	0	PCDHGB2	rods
SNX10	1.23e-15	-0.401291	0.327	0.531	2.42e-11	0	SNX10	rods
PHACTR2	5.17e-17	-0.401802	0.558	0.732	1.01e-12	0	PHACTR2	rods
PCDHGA5	1.11e-18	-0.401983	0.659	0.812	2.18e-14	0	PCDHGA5	rods
OPRM1	2.27e-22	-0.402299	0.09	0.323	4.44e-18	0	OPRM1	rods
RUNX1T1	1.07e-15	-0.40259	0.634	0.781	2.1e-11	0	RUNX1T1	rods
LHPP	1.56e-15	-0.402723	0.625	0.78	3.05e-11	0	LHPP	rods
SLC9A1	2.99e-19	-0.402997	0.418	0.647	5.87e-15	0	SLC9A1	rods
PLD1	1.52e-18	-0.403173	0.327	0.565	2.98e-14	0	PLD1	rods
UBE2QL1	6.97e-20	-0.403559	0.16	0.395	1.37e-15	0	UBE2QL1	rods
GALNT10	4.82e-19	-0.403604	0.74	0.864	9.44e-15	0	GALNT10	rods
PCDHGA4	9.39e-19	-0.403609	0.664	0.815	1.84e-14	0	PCDHGA4	rods
PLXND1	2.47e-18	-0.403829	0.517	0.722	4.84e-14	0	PLXND1	rods
IGSF3	1.12e-17	-0.404205	0.302	0.526	2.19e-13	0	IGSF3	rods
PCDHGA3	9.91e-19	-0.40421	0.666	0.82	1.94e-14	0	PCDHGA3	rods
NLRP1	4.7e-20	-0.404532	0.433	0.681	9.21e-16	0	NLRP1	rods
FAM110B	2.95e-17	-0.404677	0.738	0.873	5.78e-13	0	FAM110B	rods
ME3	2.59e-17	-0.405048	0.684	0.833	5.07e-13	0	ME3	rods
MFHAS1	4.7e-19	-0.405214	0.578	0.774	9.21e-15	0	MFHAS1	rods
RPH3AL	1.97e-20	-0.405273	0.853	0.935	3.86e-16	0	RPH3AL	rods
MAPRE2	8.8e-20	-0.405326	0.711	0.854	1.72e-15	0	MAPRE2	rods
RP11-385D13.1	7.46e-24	-0.405921	0.061	0.294	1.46e-19	0	RP11-385D13.1	rods
ADAMTS5	7.96e-22	-0.405979	0.122	0.365	1.56e-17	0	ADAMTS5	rods
PCDHGB1	5.96e-19	-0.40623	0.664	0.817	1.17e-14	0	PCDHGB1	rods
NR5A2	1.7e-16	-0.406265	0.438	0.655	3.34e-12	0	NR5A2	rods
DCDC2	1.36e-17	-0.406489	0.354	0.582	2.66e-13	0	DCDC2	rods
HBG2	1.33e-20	-0.406725	0.244	0.5	2.61e-16	0	HBG2	rods
KCNK9	5.26e-20	-0.407109	0.23	0.485	1.03e-15	0	KCNK9	rods
TDRD12	4.53e-19	-0.407161	0.124	0.339	8.88e-15	0	TDRD12	rods
COL27A1	2.23e-19	-0.407551	0.693	0.846	4.38e-15	0	COL27A1	rods
PLB1	7.61e-18	-0.407796	0.35	0.571	1.49e-13	0	PLB1	rods
TEAD4	5.48e-17	-0.407824	0.384	0.606	1.08e-12	0	TEAD4	rods
PCDHGA10	5.92e-18	-0.407849	0.609	0.778	1.16e-13	0	PCDHGA10	rods
2011-03-01	7.58e-19	-0.408385	0.363	0.596	1.49e-14	0	2011-03-01	rods
EPB41L1	1.58e-21	-0.4085	0.691	0.862	3.09e-17	0	EPB41L1	rods
MYEOV	1.17e-20	-0.408743	0.131	0.367	2.3e-16	0	MYEOV	rods
BCL11B	8.03e-20	-0.408822	0.612	0.802	1.57e-15	0	BCL11B	rods
ISPD	2.72e-19	-0.408835	0.368	0.613	5.33e-15	0	ISPD	rods
GLYATL1	9.23e-18	-0.409342	0.352	0.588	1.81e-13	0	GLYATL1	rods
TESC	4.89e-20	-0.409949	0.226	0.474	9.59e-16	0	TESC	rods
PCDHGC4	1.78e-17	-0.41001	0.395	0.613	3.5e-13	0	PCDHGC4	rods
PLPPR5	1.21e-19	-0.410105	0.3	0.56	2.38e-15	0	PLPPR5	rods
ROR1	1.11e-20	-0.410481	0.713	0.863	2.18e-16	0	ROR1	rods
KCNJ5	1.68e-20	-0.410522	0.293	0.557	3.3e-16	0	KCNJ5	rods
RP11-385J1.3	1.35e-14	-0.410539	0.327	0.539	2.65e-10	0	RP11-385J1.3	rods
PCDHGB7	7.7e-18	-0.410866	0.598	0.771	1.51e-13	0	PCDHGB7	rods
LITAF	2.36e-18	-0.41092	0.334	0.575	4.63e-14	0	LITAF	rods
SYNPR	2.76e-19	-0.411255	0.659	0.839	5.41e-15	0	SYNPR	rods
KCNQ4	1.33e-17	-0.411262	0.37	0.606	2.62e-13	0	KCNQ4	rods
ELAVL4	1.95e-17	-0.411443	0.293	0.521	3.83e-13	0	ELAVL4	rods
FRK	7.47e-23	-0.41249	0.084	0.318	1.47e-18	0	FRK	rods
CYP7B1	1.2e-18	-0.412493	0.632	0.825	2.36e-14	0	CYP7B1	rods
TGFB2	1.65e-17	-0.413333	0.53	0.727	3.23e-13	0	TGFB2	rods
ARHGEF38	6.64e-19	-0.413724	0.144	0.363	1.3e-14	0	ARHGEF38	rods
VEPH1	2.29e-17	-0.413986	0.391	0.612	4.49e-13	0	VEPH1	rods
PCDHGA12	2.57e-17	-0.414255	0.56	0.736	5.03e-13	0	PCDHGA12	rods
FYB	5.07e-24	-0.414403	0.097	0.344	9.94e-20	0	FYB	rods
PLEKHD1	3.77e-20	-0.414559	0.172	0.414	7.4e-16	0	PLEKHD1	rods
SH3KBP1	1.27e-18	-0.414677	0.458	0.687	2.49e-14	0	SH3KBP1	rods
SLC2A9	6.35e-20	-0.414994	0.72	0.845	1.25e-15	0	SLC2A9	rods
STOX2	5.25e-21	-0.415035	0.806	0.917	1.03e-16	0	STOX2	rods
CHRM2	4.12e-22	-0.415158	0.09	0.319	8.07e-18	0	CHRM2	rods
TMC1	3e-18	-0.415519	0.503	0.706	5.88e-14	0	TMC1	rods
SPAG17	4.32e-23	-0.415588	0.126	0.374	8.47e-19	0	SPAG17	rods
CLMP	4.16e-22	-0.415816	0.354	0.637	8.17e-18	0	CLMP	rods
CCDC39	2.6e-19	-0.415845	0.339	0.584	5.1e-15	0	CCDC39	rods
TGFBR2	1.73e-24	-0.416027	0.102	0.356	3.39e-20	0	TGFBR2	rods
C8orf86	1.23e-20	-0.416113	0.133	0.364	2.42e-16	0	C8orf86	rods
DPYSL2	2.49e-21	-0.416201	0.826	0.922	4.89e-17	0	DPYSL2	rods
MERTK	1.96e-18	-0.416281	0.418	0.654	3.84e-14	0	MERTK	rods
CHRDL1	2.02e-20	-0.417001	0.163	0.398	3.97e-16	0	CHRDL1	rods
SCARA3	2.95e-20	-0.417159	0.302	0.563	5.78e-16	0	SCARA3	rods
RND3	5.8e-19	-0.417304	0.309	0.553	1.14e-14	0	RND3	rods
CPZ	7.55e-19	-0.417863	0.226	0.457	1.48e-14	0	CPZ	rods
HECW2	2.65e-20	-0.418052	0.596	0.801	5.2e-16	0	HECW2	rods
CCDC169-SOHLH2	2.95e-19	-0.418124	0.242	0.478	5.79e-15	0	CCDC169-SOHLH2	rods
PECAM1	1.42e-18	-0.418984	0.219	0.445	2.79e-14	0	PECAM1	rods
GMPR	5.54e-19	-0.419001	0.287	0.521	1.09e-14	0	GMPR	rods
OMA1	9.26e-19	-0.419211	0.488	0.698	1.82e-14	0	OMA1	rods
MAN1C1	1.74e-22	-0.419843	0.747	0.892	3.4e-18	0	MAN1C1	rods
WNT9A	3.59e-20	-0.420037	0.323	0.569	7.04e-16	0	WNT9A	rods
CLRN1	2.83e-19	-0.420179	0.129	0.35	5.55e-15	0	CLRN1	rods
TBC1D1	4.58e-20	-0.420463	0.641	0.81	8.98e-16	0	TBC1D1	rods
SLC1A3	1.08e-16	-0.420558	0.316	0.528	2.11e-12	0	SLC1A3	rods
HUNK	3.08e-20	-0.421066	0.549	0.768	6.04e-16	0	HUNK	rods
CACNA1D	1.63e-22	-0.421142	0.813	0.916	3.19e-18	0	CACNA1D	rods
PPARGC1A	2.11e-22	-0.421442	0.257	0.523	4.13e-18	0	PPARGC1A	rods
VANGL1	6.46e-21	-0.421476	0.287	0.544	1.27e-16	0	VANGL1	rods
CHCHD6	9.76e-21	-0.421489	0.702	0.85	1.91e-16	0	CHCHD6	rods
VTCN1	3.7e-25	-0.421505	0.09	0.344	7.26e-21	0	VTCN1	rods
PRMT8	3.89e-16	-0.421569	0.512	0.691	7.62e-12	0	PRMT8	rods
KLHL1	6.67e-20	-0.421938	0.242	0.5	1.31e-15	0	KLHL1	rods
CA14	9.06e-20	-0.422989	0.187	0.421	1.78e-15	0	CA14	rods
CAMK2A	1.3e-17	-0.423124	0.476	0.695	2.54e-13	0	CAMK2A	rods
PXDN	1.88e-20	-0.423206	0.643	0.825	3.68e-16	0	PXDN	rods
NUAK1	6.34e-20	-0.423336	0.643	0.81	1.24e-15	0	NUAK1	rods
RP11-310N16.1	8.15e-22	-0.423466	0.16	0.412	1.6e-17	0	RP11-310N16.1	rods
DGKG	4.1e-21	-0.424004	0.77	0.894	8.05e-17	0	DGKG	rods
CALCB	1.23e-20	-0.424134	0.433	0.685	2.42e-16	0	CALCB	rods
HMGA2	1.6e-15	-0.424159	0.634	0.8	3.14e-11	0	HMGA2	rods
RHOJ	3.34e-25	-0.424499	0.115	0.381	6.55e-21	0	RHOJ	rods
COL12A1	1.65e-19	-0.424601	0.235	0.477	3.23e-15	0	COL12A1	rods
PCDHGA11	1.68e-18	-0.42482	0.569	0.752	3.3e-14	0	PCDHGA11	rods
EPHA7	3.11e-21	-0.425455	0.598	0.79	6.1e-17	0	EPHA7	rods
KCNH8	1.96e-19	-0.425485	0.58	0.771	3.85e-15	0	KCNH8	rods
RIMS4	2.23e-21	-0.425496	0.287	0.54	4.37e-17	0	RIMS4	rods
PCED1B	8.91e-22	-0.426678	0.208	0.462	1.75e-17	0	PCED1B	rods
TTC7A	8.49e-28	-0.426779	0.883	0.956	1.66e-23	0	TTC7A	rods
NEBL	4.33e-18	-0.426829	0.605	0.796	8.49e-14	0	NEBL	rods
KCNA2	7.23e-19	-0.427014	0.395	0.63	1.42e-14	0	KCNA2	rods
ADAMTS15	4.45e-21	-0.42731	0.23	0.488	8.72e-17	0	ADAMTS15	rods
TPO	8.39e-20	-0.427456	0.172	0.408	1.65e-15	0	TPO	rods
GRAMD4	1.04e-18	-0.428239	0.582	0.771	2.04e-14	0	GRAMD4	rods
C10orf67	1.36e-17	-0.428451	0.377	0.597	2.66e-13	0	C10orf67	rods
SEMA5B	2.33e-21	-0.428637	0.774	0.899	4.56e-17	0	SEMA5B	rods
DAB2	1.36e-20	-0.429077	0.156	0.394	2.66e-16	0	DAB2	rods
COL15A1	2.86e-19	-0.42915	0.332	0.57	5.61e-15	0	COL15A1	rods
FSIP1	5.73e-21	-0.429226	0.465	0.704	1.12e-16	0	FSIP1	rods
BMPER	1.35e-19	-0.429446	0.596	0.778	2.64e-15	0	BMPER	rods
ILDR2	1.34e-15	-0.429569	0.648	0.779	2.63e-11	0	ILDR2	rods
IKZF3	8.97e-25	-0.42959	0.124	0.385	1.76e-20	0	IKZF3	rods
FREM3	5.85e-25	-0.429898	0.172	0.447	1.15e-20	0	FREM3	rods
SEMA6A	1.71e-20	-0.430717	0.664	0.842	3.34e-16	0	SEMA6A	rods
MPP2	4.85e-22	-0.430781	0.497	0.723	9.52e-18	0	MPP2	rods
GNA14	5.72e-24	-0.430839	0.239	0.515	1.12e-19	0	GNA14	rods
AC090094.1	1.4e-19	-0.430918	0.293	0.539	2.74e-15	0	AC090094.1	rods
CPXM2	5.2e-18	-0.43124	0.357	0.584	1.02e-13	0	CPXM2	rods
ZCCHC24	8.12e-22	-0.431413	0.558	0.776	1.59e-17	0	ZCCHC24	rods
ATP10B	1.16e-23	-0.431569	0.185	0.453	2.27e-19	0	ATP10B	rods
CCDC85A	3.4e-18	-0.432202	0.456	0.664	6.66e-14	0	CCDC85A	rods
NACC2	1.33e-17	-0.432297	0.542	0.737	2.6e-13	0	NACC2	rods
SH3TC1	9.23e-21	-0.432561	0.318	0.575	1.81e-16	0	SH3TC1	rods
PTCH1	1.8e-23	-0.432722	0.865	0.944	3.53e-19	0	PTCH1	rods
TLE4	3.91e-20	-0.432919	0.819	0.912	7.67e-16	0	TLE4	rods
RGMA	6.37e-21	-0.43305	0.46	0.705	1.25e-16	0	RGMA	rods
PPP1R16B	2.47e-20	-0.43325	0.375	0.613	4.84e-16	0	PPP1R16B	rods
CD44	3.02e-17	-0.433369	0.368	0.586	5.92e-13	0	CD44	rods
FANCC	7e-24	-0.433574	0.783	0.895	1.37e-19	0	FANCC	rods
ANO6	1.41e-19	-0.434263	0.476	0.696	2.76e-15	0	ANO6	rods
CADM3	1.64e-20	-0.434287	0.569	0.759	3.22e-16	0	CADM3	rods
MACROD1	1.42e-31	-0.434479	0.923	0.981	2.79e-27	0	MACROD1	rods
DIRC3	6.44e-24	-0.435127	0.804	0.918	1.26e-19	0	DIRC3	rods
GPR179	3.66e-27	-0.43533	0.065	0.323	7.17e-23	0	GPR179	rods
PRLR	9.06e-24	-0.435358	0.126	0.377	1.78e-19	0	PRLR	rods
2004-03-01	3.15e-20	-0.435736	0.479	0.709	6.17e-16	0	2004-03-01	rods
MPPED1	2.27e-21	-0.43615	0.397	0.666	4.45e-17	0	MPPED1	rods
LRRC17	6.03e-26	-0.436629	0.045	0.282	1.18e-21	0	LRRC17	rods
HCN4	1.05e-20	-0.436694	0.201	0.45	2.05e-16	0	HCN4	rods
DNMT3B	3.96e-17	-0.436992	0.558	0.74	7.77e-13	0	DNMT3B	rods
TMEM156	1.77e-25	-0.437623	0.05	0.286	3.47e-21	0	TMEM156	rods
ZDHHC11B	4.31e-26	-0.437822	0.117	0.38	8.46e-22	0	ZDHHC11B	rods
ITPRIP	1.64e-17	-0.438045	0.503	0.705	3.21e-13	0	ITPRIP	rods
PTGFRN	1.34e-19	-0.438314	0.354	0.598	2.62e-15	0	PTGFRN	rods
IL1R1	2.75e-27	-0.439317	0.068	0.327	5.39e-23	0	IL1R1	rods
EVA1A	6.79e-23	-0.439691	0.156	0.41	1.33e-18	0	EVA1A	rods
PAQR5	3.82e-20	-0.439959	0.372	0.615	7.48e-16	0	PAQR5	rods
DAAM2	5.77e-24	-0.440058	0.149	0.413	1.13e-19	0	DAAM2	rods
CEP295NL	8.97e-22	-0.440714	0.375	0.638	1.76e-17	0	CEP295NL	rods
FLRT2	1.52e-16	-0.440877	0.422	0.628	2.97e-12	0	FLRT2	rods
SLC12A8	3.32e-21	-0.441136	0.454	0.691	6.51e-17	0	SLC12A8	rods
CSDC2	3.75e-24	-0.441138	0.126	0.385	7.34e-20	0	CSDC2	rods
NHS	1.36e-21	-0.441407	0.758	0.894	2.67e-17	0	NHS	rods
ZNF385C	4.22e-23	-0.441798	0.517	0.752	8.28e-19	0	ZNF385C	rods
ITGA8	2.61e-22	-0.441918	0.181	0.44	5.12e-18	0	ITGA8	rods
LRRC74A	7.71e-20	-0.442175	0.199	0.439	1.51e-15	0	LRRC74A	rods
TCF4	1.4e-23	-0.442516	0.865	0.943	2.75e-19	0	TCF4	rods
PDPN	7.36e-28	-0.44288	0.052	0.31	1.44e-23	0	PDPN	rods
CLVS2	1.13e-20	-0.444199	0.318	0.569	2.22e-16	0	CLVS2	rods
ADAMTS1	1.04e-19	-0.444525	0.323	0.571	2.04e-15	0	ADAMTS1	rods
PPM1H	2.23e-24	-0.445326	0.709	0.868	4.38e-20	0	PPM1H	rods
TNIK	3.42e-19	-0.446412	0.686	0.854	6.71e-15	0	TNIK	rods
PTPRJ	4e-23	-0.446738	0.666	0.843	7.84e-19	0	PTPRJ	rods
EEFSEC	1.14e-23	-0.446826	0.754	0.879	2.23e-19	0	EEFSEC	rods
ITGB6	4.72e-20	-0.447224	0.506	0.736	9.25e-16	0	ITGB6	rods
TBC1D9	1.03e-22	-0.447246	0.605	0.805	2.02e-18	0	TBC1D9	rods
ANGPT1	2.22e-21	-0.447291	0.185	0.432	4.35e-17	0	ANGPT1	rods
PTN	1.08e-25	-0.447491	0.113	0.378	2.11e-21	0	PTN	rods
PRDM6	1.17e-20	-0.448014	0.388	0.637	2.29e-16	0	PRDM6	rods
VCAN	2.5e-21	-0.448023	0.472	0.701	4.91e-17	0	VCAN	rods
KIF6	9.05e-21	-0.448237	0.508	0.722	1.77e-16	0	KIF6	rods
HUS1	1.97e-19	-0.448301	0.47	0.701	3.87e-15	0	HUS1	rods
PRR5L	1.95e-22	-0.448546	0.576	0.805	3.82e-18	0	PRR5L	rods
EPB41L3	5.41e-22	-0.448844	0.718	0.854	1.06e-17	0	EPB41L3	rods
ABCC4	2.83e-17	-0.449263	0.6	0.765	5.56e-13	0	ABCC4	rods
NKAIN1	1.42e-20	-0.449435	0.596	0.8	2.78e-16	0	NKAIN1	rods
PLEKHA6	1.51e-26	-0.449453	0.853	0.929	2.96e-22	0	PLEKHA6	rods
PLPP4	1.08e-21	-0.450056	0.354	0.603	2.12e-17	0	PLPP4	rods
SLC2A13	2.09e-21	-0.450122	0.451	0.694	4.11e-17	0	SLC2A13	rods
FGF1	1.25e-21	-0.450207	0.221	0.471	2.44e-17	0	FGF1	rods
THRB	8.16e-22	-0.450226	0.7	0.866	1.6e-17	0	THRB	rods
NRXN2	7.84e-27	-0.450386	0.815	0.92	1.54e-22	0	NRXN2	rods
MYO3B	3.24e-25	-0.450539	0.591	0.801	6.35e-21	0	MYO3B	rods
TSPAN32	2.06e-21	-0.45117	0.199	0.443	4.04e-17	0	TSPAN32	rods
FGF10	8.57e-25	-0.451174	0.14	0.408	1.68e-20	0	FGF10	rods
ABAT	5.02e-20	-0.451288	0.535	0.748	9.85e-16	0	ABAT	rods
ASXL3	6.17e-19	-0.451871	0.418	0.631	1.21e-14	0	ASXL3	rods
THSD7A	7.58e-23	-0.451931	0.63	0.818	1.49e-18	0	THSD7A	rods
LRRC75B	8.53e-22	-0.452464	0.255	0.507	1.67e-17	0	LRRC75B	rods
HDAC7	1.02e-21	-0.452539	0.436	0.697	2e-17	0	HDAC7	rods
MTHFD1L	1.49e-19	-0.452655	0.679	0.816	2.91e-15	0	MTHFD1L	rods
SMOC1	1.14e-22	-0.453485	0.567	0.781	2.23e-18	0	SMOC1	rods
ANK1	1.18e-24	-0.454349	0.842	0.932	2.32e-20	0	ANK1	rods
[truncated: 1,046,591+ more rows]

## Sheet: PCW12_14680
14680; 12 PCW; Retina
[truncated: 1,048,575+ more rows]

## Sheet: PCW13_15761
15761; 13 PCW; Retina
[truncated: 29,351 more rows]

[truncated: 9 more sheets: _PCW16_14713, PCW16_15232, PCW17_15221, PCW18_15700, PCW20_14556, PCW20_15183, PCW21_15184, INTEGRATED DATA, Sheet1]
