# Supplementary material for: Spatiotemporal single cell analyses reveal a transient population of retinal progenitor cells in the ciliary margin of developing human retina
Source: Research Square preprint supplement (doi:10.21203/rs.3.rs-3160527/v1), 2023-07-13
Supplement: Supplementary file 6 [file c6ecb269230124530fb09a05.xlsx]

## Sheet: Sample_Overview
Overview of human eye samples used for scRNA-Seq. Samples were profiled to a mean depth of 4690,86 counts per cell and 1921,07 genes per cell. 61,503 and 97,561 cells were obtained from the dissociated human eyes and retinas respectively following quality control (QC) and doublet cell exclusion.
Sample	Stage (PCW)	Tissue	Number of Cells before Filtering	Number of Cells after Filtering
15046	7.5	Whole Eye	8073	4713
15222	7.7	Whole Eye	14596	8815
14817	8	Whole Eye	7974	4652
15278	8	Whole Eye	9651	5668
15220	8	Whole Eye	12488	7470
15189.1	8.5	Whole Eye	9485	6046
15189.2	8.5	Whole Eye	2842	1692
14601.fixed	10	Whole Eye	6625	4848
14601	10	Whole Eye	7155	4264
14849	10	Whole Eye	8361	5480
10PCW_232020	10	Retina	12991	10057
14680	12	Retina	8445	6346
14Ret_08102020	14	Retina	14650	12291
14611	15	Retina	6391	5304
14713.1	16	Retina	10767	7574
14713.2	16	Whole Eye	12570	7855
15232	16	Retina	18187	14846
14149.1	16	Retina	1355	1152
14149.2	16	Retina	2040	1734
15221	17	Retina	17360	12872
15700	18	Retina	14360	10971
14556	20	Retina	14734	1100
15183	20	Retina	3820	1930
15184	21	Retina	14794	11384

## Sheet: PCW7.5_15046
15046; 7.5 PCW; Full Eye
	p_val	avg_log2FC	pct.1	pct.2	p_val_adj	cluster	gene	cell fate
FOXC1	5.99e-156	2.313	0.981	0.251	1e-151	0	FOXC1	NC
FABP5	2.54e-86	2.30868	0.973	0.677	4.25e-82	0	FABP5	NC
PITX2	1.09e-161	1.98203	0.938	0.164	1.82e-157	0	PITX2	NC
LUM	1.7e-84	1.95887	0.895	0.347	2.85e-80	0	LUM	NC
CTGF	1.31e-71	1.83573	0.957	0.536	2.19e-67	0	CTGF	NC
PCOLCE	1e-123	1.82428	0.973	0.378	1.68e-119	0	PCOLCE	NC
COL1A1	3.65e-92	1.75893	0.992	0.481	6.12e-88	0	COL1A1	NC
FST	5.15e-89	1.65272	0.724	0.174	8.63e-85	0	FST	NC
CDC42EP5	4.96e-101	1.51548	0.969	0.385	8.31e-97	0	CDC42EP5	NC
PITX1	1.06e-122	1.50767	0.813	0.134	1.77e-118	0	PITX1	NC
TM4SF1	8.5e-62	1.43942	0.521	0.111	1.42e-57	0	TM4SF1	NC
CTHRC1	1.78e-76	1.43665	0.794	0.24	2.98e-72	0	CTHRC1	NC
GADD45B	4.04e-54	1.39491	0.704	0.268	6.77e-50	0	GADD45B	NC
IER3	1.18e-72	1.36421	0.704	0.195	1.98e-68	0	IER3	NC
FOXC2	3.87e-154	1.35014	0.759	0.079	6.48e-150	0	FOXC2	NC
PRSS35	2.52e-62	1.34306	0.677	0.217	4.21e-58	0	PRSS35	NC
GMDS	6.72e-113	1.34289	0.786	0.167	1.13e-108	0	GMDS	NC
CYR61	6.84e-49	1.33809	0.977	0.664	1.15e-44	0	CYR61	NC
DKK2	2.72e-73	1.28705	0.564	0.106	4.56e-69	0	DKK2	NC
COL1A2	1.54e-59	1.23039	1	0.629	2.58e-55	0	COL1A2	NC
COL8A2	2.41e-125	1.22542	0.704	0.095	4.04e-121	0	COL8A2	NC
CALD1	1.17e-69	1.21503	0.984	0.717	1.95e-65	0	CALD1	NC
TWIST1	6.54e-52	1.20902	0.938	0.462	1.1e-47	0	TWIST1	NC
PRRX2	1.07e-97	1.20569	0.891	0.254	1.8e-93	0	PRRX2	NC
CPED1	2.12e-106	1.17769	0.794	0.162	3.55e-102	0	CPED1	NC
PMP22	3.13e-62	1.14333	0.813	0.3	5.24e-58	0	PMP22	NC
MGP	7.86e-36	1.12696	0.467	0.14	1.32e-31	0	MGP	NC
FGFR2	4.4e-118	1.12444	0.763	0.135	7.37e-114	0	FGFR2	NC
OGN	2.81e-72	1.10864	0.599	0.116	4.71e-68	0	OGN	NC
RRBP1	5.72e-70	1.10622	0.868	0.362	9.59e-66	0	RRBP1	NC
NRP2	6.02e-77	1.09704	0.728	0.196	1.01e-72	0	NRP2	NC
CYTL1	7.12e-50	1.094	0.51	0.134	1.19e-45	0	CYTL1	NC
COL3A1	9.13e-48	1.08133	0.977	0.514	1.53e-43	0	COL3A1	NC
LGALS1	4.89e-49	1.07537	0.981	0.558	8.19e-45	0	LGALS1	NC
IL11RA	2.06e-72	1.06868	0.887	0.323	3.45e-68	0	IL11RA	NC
LMO4	3.1e-57	1.03385	0.911	0.54	5.19e-53	0	LMO4	NC
ZFP36L2	4.29e-46	1.01411	0.984	0.744	7.18e-42	0	ZFP36L2	NC
RAMP2	3.04e-60	1.01366	0.751	0.288	5.1e-56	0	RAMP2	NC
NDNF	6.55e-104	1.01362	0.611	0.081	1.1e-99	0	NDNF	NC
S100A11	2.32e-66	1.00886	0.957	0.406	3.88e-62	0	S100A11	NC
IRX1	2.83e-90	1.00882	0.7	0.134	4.74e-86	0	IRX1	NC
COL11A1	1.89e-66	0.993285	0.728	0.239	3.17e-62	0	COL11A1	NC
MTCH1	5.21e-47	0.964055	0.946	0.729	8.72e-43	0	MTCH1	NC
OLFML3	7.31e-69	0.957968	0.732	0.211	1.22e-64	0	OLFML3	NC
NUDT4	1.66e-57	0.95417	0.926	0.534	2.78e-53	0	NUDT4	NC
COL9A3	3.25e-54	0.949844	0.607	0.174	5.44e-50	0	COL9A3	NC
PCDH18	2.34e-58	0.94853	0.875	0.342	3.92e-54	0	PCDH18	NC
ANGPT1	5.06e-67	0.94092	0.471	0.073	8.47e-63	0	ANGPT1	NC
ANXA2	1.83e-55	0.939755	0.965	0.627	3.07e-51	0	ANXA2	NC
SOCS3	1.82e-45	0.925853	0.864	0.419	3.05e-41	0	SOCS3	NC
CLMP	9.99e-61	0.920736	0.755	0.251	1.67e-56	0	CLMP	NC
FOXP1	3.42e-49	0.913575	0.922	0.559	5.74e-45	0	FOXP1	NC
BAMBI	7.39e-39	0.9111	0.595	0.231	1.24e-34	0	BAMBI	NC
FIBIN	9.06e-52	0.904249	0.607	0.172	1.52e-47	0	FIBIN	NC
MMP2	1.14e-55	0.883755	0.739	0.266	1.91e-51	0	MMP2	NC
IRX2	2.8e-55	0.882725	0.786	0.289	4.69e-51	0	IRX2	NC
EPB41L2	2.8e-46	0.882084	0.774	0.346	4.69e-42	0	EPB41L2	NC
SPATS2L	1.01e-54	0.871824	0.837	0.352	1.68e-50	0	SPATS2L	NC
SIX2	1.27e-79	0.868425	0.549	0.086	2.13e-75	0	SIX2	NC
VCAN	5.45e-39	0.867779	0.895	0.529	9.14e-35	0	VCAN	NC
FBN2	4.96e-58	0.865282	0.875	0.422	8.31e-54	0	FBN2	NC
PENK	2.47e-27	0.860461	0.187	0.026	4.14e-23	0	PENK	NC
LAMA1	3.99e-92	0.841238	0.56	0.079	6.68e-88	0	LAMA1	NC
CDH11	5.83e-42	0.827001	0.911	0.521	9.77e-38	0	CDH11	NC
MAGED2	3.19e-48	0.826806	0.981	0.816	5.34e-44	0	MAGED2	NC
EGFL6	5.42e-34	0.82408	0.638	0.255	9.08e-30	0	EGFL6	NC
BGN	2.84e-79	0.814428	0.49	0.066	4.75e-75	0	BGN	NC
MFAP2	3.65e-43	0.804209	0.872	0.489	6.12e-39	0	MFAP2	NC
NFIA	6.53e-56	0.793256	0.778	0.277	1.09e-51	0	NFIA	NC
GLT8D2	5.25e-64	0.776273	0.759	0.229	8.8e-60	0	GLT8D2	NC
KCNQ1OT1	5.77e-32	0.773031	0.953	0.659	9.67e-28	0	KCNQ1OT1	NC
RAB34	5.61e-47	0.772288	0.946	0.606	9.39e-43	0	RAB34	NC
FLRT3	7.83e-21	0.76321	0.704	0.418	1.31e-16	0	FLRT3	NC
EDN3	3.89e-56	0.752284	0.572	0.141	6.52e-52	0	EDN3	NC
CNN2	5.95e-45	0.743877	0.844	0.421	9.97e-41	0	CNN2	NC
CTSK	8.64e-54	0.74233	0.755	0.27	1.45e-49	0	CTSK	NC
FSTL1	1.08e-40	0.741873	0.887	0.498	1.81e-36	0	FSTL1	NC
STAT3	2.22e-39	0.740909	0.86	0.468	3.72e-35	0	STAT3	NC
RFLNA	5.58e-46	0.739073	0.537	0.153	9.36e-42	0	RFLNA	NC
TPM1	2.26e-38	0.738405	0.961	0.663	3.78e-34	0	TPM1	NC
MFAP4	1.04e-43	0.736731	0.805	0.328	1.75e-39	0	MFAP4	NC
KCTD12	1.68e-42	0.734492	0.732	0.293	2.81e-38	0	KCTD12	NC
REV3L	1.89e-34	0.731565	0.658	0.307	3.16e-30	0	REV3L	NC
SERTAD4	1.46e-70	0.730434	0.44	0.058	2.45e-66	0	SERTAD4	NC
SHISA2	2.63e-31	0.722528	0.479	0.172	4.41e-27	0	SHISA2	NC
DSTN	5.15e-38	0.713812	0.961	0.741	8.63e-34	0	DSTN	NC
COL6A2	3.83e-43	0.701364	0.938	0.431	6.42e-39	0	COL6A2	NC
GAS1	2.75e-29	0.701302	0.825	0.484	4.61e-25	0	GAS1	NC
SDC2	5.99e-31	0.699799	0.704	0.364	1e-26	0	SDC2	NC
EVA1B	3.9e-41	0.69294	0.856	0.439	6.54e-37	0	EVA1B	NC
CD81	5.88e-40	0.689996	0.981	0.801	9.85e-36	0	CD81	NC
TSC22D1	2.13e-37	0.686988	0.965	0.762	3.56e-33	0	TSC22D1	NC
FABP4	5.66e-58	0.683809	0.268	0.018	9.48e-54	0	FABP4	NC
LMCD1	1.38e-78	0.68362	0.482	0.062	2.3e-74	0	LMCD1	NC
ACTG1	1.27e-58	0.680998	1	0.985	2.13e-54	0	ACTG1	NC
PLBD1	3.39e-38	0.672313	0.549	0.192	5.68e-34	0	PLBD1	NC
JUNB	2.91e-27	0.671338	0.895	0.58	4.87e-23	0	JUNB	NC
SPARC	4.61e-29	0.66977	0.992	0.702	7.72e-25	0	SPARC	NC
CCND2	1.89e-33	0.669318	0.837	0.486	3.17e-29	0	CCND2	NC
LTBP1	1.2e-38	0.663194	0.65	0.27	2e-34	0	LTBP1	NC
PRRX1	2.7e-36	0.65846	0.778	0.346	4.52e-32	0	PRRX1	NC
MDFI	4.33e-39	0.656739	0.763	0.346	7.25e-35	0	MDFI	NC
HES1	8.28e-14	0.650035	0.782	0.58	1.39e-09	0	HES1	NC
WWTR1	3.29e-40	0.646736	0.584	0.208	5.51e-36	0	WWTR1	NC
MEX3B	3.12e-35	0.645087	0.673	0.3	5.22e-31	0	MEX3B	NC
EFEMP2	6e-38	0.641681	0.704	0.329	1.01e-33	0	EFEMP2	NC
MXRA8	7.09e-39	0.641671	0.77	0.361	1.19e-34	0	MXRA8	NC
ITGB1	6.18e-32	0.641086	0.895	0.603	1.03e-27	0	ITGB1	NC
F2R	1.74e-31	0.64028	0.591	0.267	2.92e-27	0	F2R	NC
GPX8	2.4e-35	0.637499	0.802	0.441	4.01e-31	0	GPX8	NC
CNN3	1.85e-33	0.63721	0.965	0.763	3.11e-29	0	CNN3	NC
ITM2C	6.46e-34	0.636879	0.949	0.654	1.08e-29	0	ITM2C	NC
FOXF2	5.68e-82	0.635511	0.354	0.021	9.51e-78	0	FOXF2	NC
CALU	7.51e-31	0.634313	0.918	0.624	1.26e-26	0	CALU	NC
BOC	2.69e-33	0.633766	0.576	0.228	4.51e-29	0	BOC	NC
PPP1R12B	6.25e-45	0.632213	0.494	0.139	1.05e-40	0	PPP1R12B	NC
ARHGAP28	2.19e-30	0.630766	0.658	0.292	3.68e-26	0	ARHGAP28	NC
RASL11B	6.17e-20	0.627972	0.42	0.19	1.03e-15	0	RASL11B	NC
RGCC	1.47e-28	0.627358	0.362	0.102	2.46e-24	0	RGCC	NC
SEMA3E	5.5e-31	0.626203	0.272	0.053	9.21e-27	0	SEMA3E	NC
TPM4	7.47e-30	0.625546	0.918	0.647	1.25e-25	0	TPM4	NC
FOXD2	1.68e-73	0.622635	0.424	0.048	2.81e-69	0	FOXD2	NC
EMILIN1	9.1e-47	0.618608	0.724	0.257	1.52e-42	0	EMILIN1	NC
SULT1E1	1.98e-09	0.616931	0.319	0.162	3.32e-05	0	SULT1E1	NC
EMCN	5.42e-58	0.615489	0.342	0.039	9.08e-54	0	EMCN	NC
PIEZO2	1.26e-47	0.615038	0.463	0.105	2.11e-43	0	PIEZO2	NC
RERG	4.86e-51	0.614961	0.42	0.077	8.14e-47	0	RERG	NC
TPST1	2.45e-31	0.614067	0.412	0.132	4.1e-27	0	TPST1	NC
SLC9A3R2	5.15e-50	0.613293	0.669	0.223	8.64e-46	0	SLC9A3R2	NC
APP	2.52e-29	0.607315	0.926	0.616	4.22e-25	0	APP	NC
LAMB1	6.51e-34	0.604866	0.677	0.277	1.09e-29	0	LAMB1	NC
CALR	8.35e-23	0.600653	0.984	0.778	1.4e-18	0	CALR	NC
NR3C1	7.96e-37	0.598641	0.615	0.231	1.33e-32	0	NR3C1	NC
THBS1	2.92e-47	0.595111	0.381	0.071	4.89e-43	0	THBS1	NC
NFKBIZ	1.89e-42	0.593324	0.572	0.175	3.17e-38	0	NFKBIZ	NC
ITGB5	2.35e-32	0.593277	0.502	0.176	3.94e-28	0	ITGB5	NC
2011-09-01	8.86e-23	0.593051	0.942	0.666	1.48e-18	0	2011-09-01	NC
PAPSS1	7.45e-27	0.588329	0.72	0.406	1.25e-22	0	PAPSS1	NC
TMSB4X	1.8e-24	0.586909	1	0.938	3.02e-20	0	TMSB4X	NC
CNMD	2.97e-52	0.583982	0.296	0.032	4.97e-48	0	CNMD	NC
CRTAP	1.56e-29	0.58134	0.693	0.353	2.61e-25	0	CRTAP	NC
VIM	1.81e-22	0.576981	1	0.99	3.03e-18	0	VIM	NC
FHL3	2.6e-33	0.576719	0.658	0.266	4.36e-29	0	FHL3	NC
COL6A3	2.82e-36	0.573926	0.661	0.24	4.73e-32	0	COL6A3	NC
EGR1	3.36e-20	0.57173	0.868	0.59	5.64e-16	0	EGR1	NC
FBLN5	1.57e-33	0.570422	0.591	0.216	2.64e-29	0	FBLN5	NC
PRR16	9.03e-58	0.568584	0.459	0.083	1.51e-53	0	PRR16	NC
TMEM119	6.78e-43	0.568101	0.482	0.126	1.14e-38	0	TMEM119	NC
GPC3	8.28e-25	0.561838	0.58	0.249	1.39e-20	0	GPC3	NC
ERBIN	4.38e-29	0.560178	0.693	0.362	7.34e-25	0	ERBIN	NC
COL4A1	9.04e-27	0.558569	0.56	0.249	1.51e-22	0	COL4A1	NC
GNAS	1.52e-43	0.557429	0.996	0.974	2.54e-39	0	GNAS	NC
ROBO1	1.35e-26	0.555877	0.591	0.261	2.26e-22	0	ROBO1	NC
MYH10	2.96e-21	0.555852	0.821	0.601	4.96e-17	0	MYH10	NC
GYG1	2.28e-22	0.555458	0.514	0.243	3.81e-18	0	GYG1	NC
SHOX	5.42e-54	0.54513	0.331	0.04	9.08e-50	0	SHOX	NC
TIMP1	4.04e-32	0.543969	0.887	0.567	6.77e-28	0	TIMP1	NC
PLS3	2.09e-26	0.542498	0.568	0.254	3.5e-22	0	PLS3	NC
LY6E	8.83e-36	0.542321	0.79	0.371	1.48e-31	0	LY6E	NC
COL24A1	2.38e-57	0.53798	0.362	0.046	3.98e-53	0	COL24A1	NC
HMGA2	3.82e-25	0.537023	0.751	0.413	6.4e-21	0	HMGA2	NC
TSPAN4	4.84e-30	0.531398	0.739	0.385	8.11e-26	0	TSPAN4	NC
HS3ST3A1	5.97e-21	0.528222	0.265	0.077	1e-16	0	HS3ST3A1	NC
SCX	1.43e-19	0.525325	0.304	0.099	2.39e-15	0	SCX	NC
NDN	4.83e-25	0.523452	0.926	0.691	8.1e-21	0	NDN	NC
COL4A2	4.45e-21	0.523449	0.712	0.426	7.45e-17	0	COL4A2	NC
TUSC3	1.06e-20	0.523319	0.802	0.553	1.78e-16	0	TUSC3	NC
ELK3	7.06e-45	0.522157	0.447	0.106	1.18e-40	0	ELK3	NC
PPFIBP1	3.22e-22	0.519218	0.572	0.291	5.4e-18	0	PPFIBP1	NC
PTN	2.8e-29	0.518023	0.809	0.447	4.7e-25	0	PTN	NC
FCGRT	3.1e-44	0.517652	0.763	0.293	5.2e-40	0	FCGRT	NC
CREB5	3.72e-23	0.514627	0.763	0.415	6.23e-19	0	CREB5	NC
NEDD9	1.84e-50	0.512385	0.471	0.106	3.08e-46	0	NEDD9	NC
FKBP10	2.33e-28	0.512049	0.813	0.477	3.91e-24	0	FKBP10	NC
FZD2	1.23e-22	0.507623	0.763	0.473	2.06e-18	0	FZD2	NC
C2orf40	4.68e-28	0.505458	0.498	0.192	7.85e-24	0	C2orf40	NC
FLNB	1.32e-30	0.503105	0.556	0.222	2.22e-26	0	FLNB	NC
SFRP2	6e-101	2.98507	0.995	0.53	1e-96	1	SFRP2	RPCs
SOX2	8.01e-167	2.30013	0.984	0.125	1.34e-162	1	SOX2	RPCs
CKB	9.74e-84	2.23117	0.984	0.483	1.63e-79	1	CKB	RPCs
DAPL1	3.75e-105	2.16737	0.958	0.275	6.29e-101	1	DAPL1	RPCs
SPP1	2.09e-128	1.875	0.847	0.124	3.51e-124	1	SPP1	RPCs
HMX1	2.52e-98	1.86203	0.815	0.162	4.22e-94	1	HMX1	RPCs
CRABP1	1.19e-73	1.85002	1	0.685	1.99e-69	1	CRABP1	RPCs
TTYH1	6.7e-129	1.84982	0.82	0.111	1.12e-124	1	TTYH1	RPCs
RAX	2.13e-119	1.82733	0.968	0.196	3.56e-115	1	RAX	RPCs
SIX6	3.76e-123	1.79781	0.974	0.193	6.3e-119	1	SIX6	RPCs
CYP1B1	2.24e-20	1.78103	0.561	0.321	3.75e-16	1	CYP1B1	RPCs
CCND1	2.94e-69	1.77061	0.984	0.618	4.93e-65	1	CCND1	RPCs
MAB21L1	3.85e-85	1.66739	0.963	0.377	6.45e-81	1	MAB21L1	RPCs
RORB	7.39e-104	1.63605	0.894	0.182	1.24e-99	1	RORB	RPCs
ALDH1A1	4.75e-13	1.59917	0.354	0.162	7.96e-09	1	ALDH1A1	RPCs
HES5	2.78e-63	1.57284	0.593	0.113	4.66e-59	1	HES5	RPCs
METRN	1.2e-92	1.53002	0.958	0.309	2.01e-88	1	METRN	RPCs
FZD5	3.49e-139	1.52729	0.804	0.09	5.84e-135	1	FZD5	RPCs
COL2A1	2.31e-83	1.39059	0.884	0.253	3.87e-79	1	COL2A1	RPCs
CHD7	7.41e-92	1.37956	0.937	0.256	1.24e-87	1	CHD7	RPCs
LHX2	4.4e-95	1.27744	0.915	0.203	7.36e-91	1	LHX2	RPCs
PAX6	2.99e-63	1.27633	0.989	0.358	5.01e-59	1	PAX6	RPCs
DKK3	9.92e-85	1.27093	0.915	0.289	1.66e-80	1	DKK3	RPCs
HMGA1	3.21e-56	1.23167	0.984	0.605	5.38e-52	1	HMGA1	RPCs
LRP2	2.7e-136	1.21115	0.683	0.056	4.52e-132	1	LRP2	RPCs
ZIC2	8.69e-84	1.2026	0.841	0.191	1.46e-79	1	ZIC2	RPCs
PCDH7	1.21e-69	1.20158	0.836	0.255	2.02e-65	1	PCDH7	RPCs
MSI2	1.03e-61	1.15575	0.926	0.418	1.72e-57	1	MSI2	RPCs
CDH2	4.55e-81	1.14424	0.915	0.273	7.62e-77	1	CDH2	RPCs
GPM6A	2.7e-75	1.1205	0.873	0.236	4.53e-71	1	GPM6A	RPCs
FGF19	1.79e-118	1.06192	0.577	0.041	2.99e-114	1	FGF19	RPCs
VSX2	7.89e-153	1.05686	0.767	0.061	1.32e-148	1	VSX2	RPCs
MAPK10	1.05e-72	1.03817	0.794	0.206	1.77e-68	1	MAPK10	RPCs
LGR4	1.26e-69	1.0277	0.847	0.263	2.11e-65	1	LGR4	RPCs
FEZF2	1.43e-105	1.02746	0.709	0.09	2.39e-101	1	FEZF2	RPCs
CRB1	9.27e-122	1.01791	0.635	0.055	1.55e-117	1	CRB1	RPCs
ADAMTS18	3.64e-86	1.01083	0.646	0.1	6.09e-82	1	ADAMTS18	RPCs
SIX3	6.52e-64	1.00414	0.952	0.282	1.09e-59	1	SIX3	RPCs
CLU	8.02e-52	0.993518	0.937	0.455	1.34e-47	1	CLU	RPCs
FGF9	5.33e-55	0.977795	0.64	0.164	8.94e-51	1	FGF9	RPCs
FZD3	1.95e-55	0.962389	0.825	0.295	3.26e-51	1	FZD3	RPCs
PKDCC	4.13e-45	0.953234	0.862	0.373	6.92e-41	1	PKDCC	RPCs
EML1	1e-71	0.950118	0.762	0.202	1.68e-67	1	EML1	RPCs
FIGN	5.43e-59	0.942476	0.772	0.26	9.09e-55	1	FIGN	RPCs
SYT1	1.24e-56	0.933798	0.831	0.246	2.08e-52	1	SYT1	RPCs
PLEKHA1	1.39e-42	0.930804	0.757	0.319	2.33e-38	1	PLEKHA1	RPCs
SELENOP	1.52e-55	0.927742	0.667	0.166	2.55e-51	1	SELENOP	RPCs
LMAN1	5.99e-41	0.919648	0.921	0.599	1e-36	1	LMAN1	RPCs
LINC00632	1.13e-67	0.919387	0.767	0.208	1.89e-63	1	LINC00632	RPCs
HMGCS1	2.67e-31	0.913195	0.778	0.357	4.48e-27	1	HMGCS1	RPCs
FGFBP3	3e-80	0.90821	0.64	0.111	5.03e-76	1	FGFBP3	RPCs
RAB31	1.66e-69	0.908129	0.794	0.193	2.77e-65	1	RAB31	RPCs
PHYHIPL	1.12e-60	0.906961	0.746	0.197	1.88e-56	1	PHYHIPL	RPCs
DCBLD2	6.52e-50	0.90528	0.799	0.315	1.09e-45	1	DCBLD2	RPCs
HOMER2	5.35e-89	0.896868	0.688	0.116	8.97e-85	1	HOMER2	RPCs
TBX2	1.58e-64	0.890147	0.714	0.172	2.65e-60	1	TBX2	RPCs
FADS1	1.05e-46	0.878034	0.905	0.388	1.76e-42	1	FADS1	RPCs
MSI1	1.21e-62	0.874208	0.794	0.24	2.02e-58	1	MSI1	RPCs
LINC01833	3.18e-60	0.873214	0.772	0.21	5.32e-56	1	LINC01833	RPCs
HSPA1A	7.87e-27	0.861963	0.921	0.667	1.32e-22	1	HSPA1A	RPCs
2003-03-01	1.52e-79	0.8481	0.64	0.108	2.55e-75	1	2003-03-01	RPCs
TBX2-AS1	9.92e-93	0.838465	0.667	0.096	1.66e-88	1	TBX2-AS1	RPCs
SPOCK1	4.21e-39	0.831187	0.503	0.132	7.05e-35	1	SPOCK1	RPCs
PHIP	5.02e-36	0.829598	0.921	0.554	8.42e-32	1	PHIP	RPCs
BAZ2B	2.68e-38	0.808163	0.878	0.432	4.49e-34	1	BAZ2B	RPCs
TOX	1.73e-42	0.806179	0.64	0.211	2.9e-38	1	TOX	RPCs
SPHK1	9.12e-76	0.802401	0.566	0.083	1.53e-71	1	SPHK1	RPCs
DIO3	3.07e-49	0.800269	0.397	0.061	5.14e-45	1	DIO3	RPCs
LCA5	7.44e-43	0.7945	0.661	0.22	1.25e-38	1	LCA5	RPCs
DTX4	5.25e-67	0.791972	0.54	0.087	8.79e-63	1	DTX4	RPCs
PTPRZ1	7.05e-54	0.790019	0.566	0.125	1.18e-49	1	PTPRZ1	RPCs
DACH1	2.11e-39	0.788552	0.862	0.399	3.54e-35	1	DACH1	RPCs
CRYGD	4.1e-72	0.785466	0.587	0.098	6.87e-68	1	CRYGD	RPCs
LHX9	1.01e-78	0.783366	0.497	0.057	1.69e-74	1	LHX9	RPCs
MGARP	1.74e-80	0.773232	0.561	0.074	2.91e-76	1	MGARP	RPCs
CENPV	5.9e-32	0.77163	0.952	0.64	9.88e-28	1	CENPV	RPCs
CPAMD8	1.96e-49	0.770579	0.519	0.115	3.28e-45	1	CPAMD8	RPCs
CDCA7L	9.24e-65	0.763532	0.667	0.152	1.55e-60	1	CDCA7L	RPCs
RCN1	3.28e-36	0.762865	0.931	0.582	5.49e-32	1	RCN1	RPCs
FOXD1	7.69e-21	0.750937	0.577	0.274	1.29e-16	1	FOXD1	RPCs
MEIS1	3.19e-61	0.748413	0.677	0.158	5.35e-57	1	MEIS1	RPCs
CLRN1	5.12e-127	0.742348	0.593	0.039	8.58e-123	1	CLRN1	RPCs
URI1	1.28e-35	0.733456	0.91	0.554	2.15e-31	1	URI1	RPCs
NR2F1	3.49e-24	0.724599	0.82	0.464	5.85e-20	1	NR2F1	RPCs
FAM13C	7.42e-75	0.719691	0.587	0.094	1.24e-70	1	FAM13C	RPCs
GINS2	1.37e-32	0.718003	0.64	0.247	2.3e-28	1	GINS2	RPCs
SLF1	1.09e-43	0.717706	0.735	0.255	1.83e-39	1	SLF1	RPCs
CADM2	1.28e-44	0.71657	0.635	0.184	2.15e-40	1	CADM2	RPCs
SOX9	4.99e-32	0.711792	0.651	0.257	8.36e-28	1	SOX9	RPCs
SLITRK5	7.62e-53	0.705161	0.598	0.146	1.28e-48	1	SLITRK5	RPCs
MCM7	3.47e-32	0.703601	0.762	0.359	5.81e-28	1	MCM7	RPCs
PPA1	1.15e-32	0.696954	0.926	0.623	1.92e-28	1	PPA1	RPCs
CRB2	1.02e-56	0.68939	0.545	0.109	1.7e-52	1	CRB2	RPCs
PABPC1	6.29e-33	0.688105	0.995	0.846	1.05e-28	1	PABPC1	RPCs
CFAP298	1.47e-37	0.687202	0.772	0.361	2.46e-33	1	CFAP298	RPCs
NAP1L1	3.34e-36	0.683424	1	0.901	5.6e-32	1	NAP1L1	RPCs
MCM3	4.36e-32	0.676339	0.688	0.289	7.31e-28	1	MCM3	RPCs
NES	5.19e-33	0.675076	0.72	0.293	8.69e-29	1	NES	RPCs
TMEM123	7.07e-42	0.67107	0.815	0.333	1.18e-37	1	TMEM123	RPCs
FGF8	1.02e-64	0.666197	0.291	0.016	1.71e-60	1	FGF8	RPCs
FAM69C	9.97e-69	0.663599	0.476	0.062	1.67e-64	1	FAM69C	RPCs
PNISR	2.48e-26	0.659421	0.989	0.796	4.15e-22	1	PNISR	RPCs
C16orf45	2.24e-31	0.653206	0.709	0.315	3.76e-27	1	C16orf45	RPCs
ENO1	7.03e-37	0.646273	0.989	0.81	1.18e-32	1	ENO1	RPCs
DAAM1	2.04e-25	0.642424	0.794	0.405	3.41e-21	1	DAAM1	RPCs
ID4	2.23e-16	0.639563	0.852	0.588	3.74e-12	1	ID4	RPCs
FRRS1L	8.83e-33	0.635131	0.598	0.215	1.48e-28	1	FRRS1L	RPCs
MEST	2.56e-27	0.632296	0.937	0.611	4.3e-23	1	MEST	RPCs
MYB	1.49e-63	0.629649	0.444	0.058	2.49e-59	1	MYB	RPCs
AHI1	4.59e-31	0.621564	0.735	0.323	7.69e-27	1	AHI1	RPCs
DEK	1.07e-30	0.619828	0.989	0.764	1.8e-26	1	DEK	RPCs
TPPP3	2.8e-52	0.619552	0.582	0.124	4.69e-48	1	TPPP3	RPCs
PAWR	1.63e-41	0.618088	0.651	0.21	2.72e-37	1	PAWR	RPCs
RASSF4	3.29e-39	0.617929	0.513	0.134	5.52e-35	1	RASSF4	RPCs
NRIP1	6.82e-29	0.61679	0.709	0.338	1.14e-24	1	NRIP1	RPCs
S1PR3	1.03e-24	0.612533	0.455	0.16	1.72e-20	1	S1PR3	RPCs
SRGAP3	2.06e-32	0.608293	0.656	0.257	3.46e-28	1	SRGAP3	RPCs
AL139246.5	9.48e-19	0.60151	0.243	0.059	1.59e-14	1	AL139246.5	RPCs
WDR54	3.19e-33	0.600632	0.725	0.312	5.34e-29	1	WDR54	RPCs
HELLS	2.04e-24	0.600571	0.693	0.327	3.42e-20	1	HELLS	RPCs
MUM1	5.49e-31	0.598032	0.72	0.314	9.2e-27	1	MUM1	RPCs
ZBTB16	4.7e-67	0.596953	0.487	0.067	7.87e-63	1	ZBTB16	RPCs
ODC1	1.91e-24	0.596409	0.984	0.747	3.2e-20	1	ODC1	RPCs
MSH6	4.13e-23	0.590866	0.767	0.423	6.93e-19	1	MSH6	RPCs
CAMK2N1	3.83e-25	0.589322	0.81	0.415	6.42e-21	1	CAMK2N1	RPCs
CDH6	2.21e-17	0.587446	0.529	0.247	3.71e-13	1	CDH6	RPCs
PIK3R1	4.44e-21	0.584053	0.64	0.327	7.44e-17	1	PIK3R1	RPCs
GABPB1-AS1	4.1e-23	0.581423	0.778	0.452	6.87e-19	1	GABPB1-AS1	RPCs
SORCS1	4.88e-59	0.57891	0.402	0.051	8.18e-55	1	SORCS1	RPCs
ARHGEF26	3.28e-40	0.577776	0.561	0.155	5.49e-36	1	ARHGEF26	RPCs
CXXC5	7.51e-31	0.577367	0.868	0.391	1.26e-26	1	CXXC5	RPCs
PSIP1	2.03e-24	0.573272	0.958	0.721	3.4e-20	1	PSIP1	RPCs
MYCN	8.9e-40	0.571547	0.577	0.162	1.49e-35	1	MYCN	RPCs
CCNB1IP1	1.51e-25	0.568542	0.905	0.612	2.54e-21	1	CCNB1IP1	RPCs
GRIA4	1.35e-55	0.568452	0.471	0.078	2.26e-51	1	GRIA4	RPCs
NR2E1	7.3e-69	0.566698	0.381	0.033	1.22e-64	1	NR2E1	RPCs
TRH	1.02e-50	0.564844	0.45	0.076	1.7e-46	1	TRH	RPCs
NR2F6	3.83e-27	0.562337	0.841	0.475	6.42e-23	1	NR2F6	RPCs
ILDR2	5.22e-56	0.562151	0.439	0.066	8.74e-52	1	ILDR2	RPCs
KIAA1217	1.57e-33	0.55831	0.466	0.13	2.63e-29	1	KIAA1217	RPCs
PLEKHG1	9.19e-34	0.558006	0.571	0.188	1.54e-29	1	PLEKHG1	RPCs
PCNA	1.25e-16	0.557811	0.64	0.357	2.1e-12	1	PCNA	RPCs
TMTC4	3.28e-28	0.555163	0.608	0.25	5.5e-24	1	TMTC4	RPCs
SEMA5A	4.57e-21	0.553577	0.593	0.27	7.66e-17	1	SEMA5A	RPCs
COL9A1	6.72e-23	0.552523	0.704	0.343	1.13e-18	1	COL9A1	RPCs
IMPDH2	1.93e-21	0.550137	0.878	0.637	3.23e-17	1	IMPDH2	RPCs
LUC7L3	4.91e-20	0.549533	0.974	0.764	8.22e-16	1	LUC7L3	RPCs
HSP90AA1	3.04e-31	0.547611	0.995	0.961	5.09e-27	1	HSP90AA1	RPCs
SHROOM3	2.35e-32	0.543277	0.545	0.182	3.94e-28	1	SHROOM3	RPCs
PLPP3	8.76e-25	0.541258	0.661	0.29	1.47e-20	1	PLPP3	RPCs
NASP	6.76e-21	0.53812	0.942	0.793	1.13e-16	1	NASP	RPCs
KLHDC8B	1.45e-28	0.537097	0.677	0.285	2.43e-24	1	KLHDC8B	RPCs
COL13A1	3.15e-35	0.532208	0.476	0.122	5.28e-31	1	COL13A1	RPCs
NHSL1	1.6e-28	0.529355	0.45	0.142	2.69e-24	1	NHSL1	RPCs
UNG	4.09e-33	0.524829	0.513	0.16	6.85e-29	1	UNG	RPCs
UHRF1	8.58e-29	0.523269	0.423	0.119	1.44e-24	1	UHRF1	RPCs
CALB1	1.75e-10	0.522413	0.164	0.047	2.93e-06	1	CALB1	RPCs
FRMD4B	4.82e-31	0.521549	0.476	0.146	8.08e-27	1	FRMD4B	RPCs
ACVR2B	2.16e-30	0.521512	0.64	0.248	3.61e-26	1	ACVR2B	RPCs
MOB3B	3.76e-36	0.517084	0.418	0.096	6.3e-32	1	MOB3B	RPCs
FAM171A2	4.4e-26	0.515748	0.704	0.335	7.37e-22	1	FAM171A2	RPCs
SQLE	5.21e-24	0.515542	0.852	0.462	8.73e-20	1	SQLE	RPCs
ZIC1	8.02e-59	0.51299	0.423	0.056	1.34e-54	1	ZIC1	RPCs
RPLP0	5e-37	0.511918	1	0.983	8.37e-33	1	RPLP0	RPCs
GULP1	5.81e-22	0.510296	0.688	0.329	9.74e-18	1	GULP1	RPCs
HSPA1B	5.96e-36	0.507897	0.804	0.335	9.99e-32	1	HSPA1B	RPCs
HES11	2.52e-16	0.505586	0.926	0.572	4.21e-12	1	HES1	RPCs
CLDN1	1.92e-44	0.504963	0.328	0.045	3.22e-40	1	CLDN1	RPCs
MCM5	3.99e-26	0.504001	0.571	0.224	6.68e-22	1	MCM5	RPCs
NKAIN4	4.79e-36	0.503912	0.741	0.257	8.02e-32	1	NKAIN4	RPCs
ZNF219	1.25e-32	0.501972	0.608	0.212	2.09e-28	1	ZNF219	RPCs
LGR5	7.09e-58	0.501316	0.365	0.039	1.19e-53	1	LGR5	RPCs
PMEL	4.4e-141	5.13197	1	0.229	7.38e-137	2	PMEL	RPE
DCT	1.16e-183	4.64452	1	0.126	1.94e-179	2	DCT	RPE
TYRP1	4.42e-249	3.54041	0.987	0.05	7.41e-245	2	TYRP1	RPE
SERPINF1	5.47e-116	3.53081	0.994	0.318	9.16e-112	2	SERPINF1	RPE
HSD17B2	1.7e-217	3.21934	1	0.077	2.85e-213	2	HSD17B2	RPE
APOE	1.91e-112	3.11448	1	0.365	3.2e-108	2	APOE	RPE
TRPM3	8.29e-141	3.0824	0.994	0.21	1.39e-136	2	TRPM3	RPE
ASAH1	8.25e-99	2.72253	0.987	0.436	1.38e-94	2	ASAH1	RPE
SLC3A2	8.65e-90	2.44815	0.994	0.635	1.45e-85	2	SLC3A2	RPE
SLC38A11	2e-265	2.41046	0.962	0.029	3.35e-261	2	SLC38A11	RPE
TRPM1	5.06e-296	2.31492	0.987	0.022	8.47e-292	2	TRPM1	RPE
RAB38	6.19e-197	2.30569	0.949	0.073	1.04e-192	2	RAB38	RPE
ITM2B	6.79e-83	2.29539	0.994	0.785	1.14e-78	2	ITM2B	RPE
NCCRP1	9.05e-261	2.2937	0.859	0.016	1.52e-256	2	NCCRP1	RPE
WNT2B	6.71e-85	2.27767	0.686	0.117	1.12e-80	2	WNT2B	RPE
MITF	5.29e-230	2.2539	0.974	0.055	8.87e-226	2	MITF	RPE
SLC35D3	3.01e-269	2.21297	0.949	0.027	5.05e-265	2	SLC35D3	RPE
LYPD1	6.76e-227	2.20597	0.929	0.046	1.13e-222	2	LYPD1	RPE
TFPI2	5.42e-184	2.15981	0.763	0.035	9.08e-180	2	TFPI2	RPE
KRT18	1.91e-138	2.1519	0.974	0.158	3.21e-134	2	KRT18	RPE
CDO1	4.58e-87	2.12926	0.968	0.395	7.67e-83	2	CDO1	RPE
ATP6V1C2	1.26e-219	2.11677	0.846	0.03	2.11e-215	2	ATP6V1C2	RPE
GNG11	4.01e-118	2.10426	0.897	0.163	6.72e-114	2	GNG11	RPE
GJA1	6.58e-87	2.10174	0.974	0.401	1.1e-82	2	GJA1	RPE
TSPAN10	3.89e-201	2.03031	0.949	0.073	6.52e-197	2	TSPAN10	RPE
SLC7A8	2.85e-195	1.98797	0.974	0.081	4.77e-191	2	SLC7A8	RPE
GSTP1	1.23e-85	1.95937	1	0.929	2.06e-81	2	GSTP1	RPE
ALDH1A3	4.88e-185	1.77554	0.84	0.05	8.18e-181	2	ALDH1A3	RPE
NPC2	1.27e-83	1.75417	0.981	0.459	2.13e-79	2	NPC2	RPE
OTX2	1.9e-266	1.74783	0.923	0.022	3.18e-262	2	OTX2	RPE
ARL4A	1.23e-77	1.71935	0.942	0.38	2.06e-73	2	ARL4A	RPE
TMEM98	5.28e-76	1.71104	0.994	0.699	8.85e-72	2	TMEM98	RPE
KIF21A	3.25e-104	1.68393	0.942	0.234	5.45e-100	2	KIF21A	RPE
TYR	3.24e-284	1.67197	0.891	0.012	5.42e-280	2	TYR	RPE
IGFBP7	9.97e-77	1.6325	0.763	0.156	1.67e-72	2	IGFBP7	RPE
COL18A1	5.61e-138	1.62936	0.942	0.143	9.41e-134	2	COL18A1	RPE
KRT8	6.04e-103	1.58583	0.949	0.206	1.01e-98	2	KRT8	RPE
GPNMB	1.01e-228	1.55496	0.897	0.036	1.69e-224	2	GPNMB	RPE
GPR143	9.02e-224	1.51935	0.878	0.037	1.51e-219	2	GPR143	RPE
SLC24A5	1.31e-267	1.51513	0.897	0.018	2.2e-263	2	SLC24A5	RPE
SLC38A8	4.68e-214	1.49935	0.724	0.014	7.84e-210	2	SLC38A8	RPE
SLC2A1	3.64e-68	1.46835	0.968	0.365	6.09e-64	2	SLC2A1	RPE
ITGAV	9.71e-101	1.45565	0.84	0.161	1.63e-96	2	ITGAV	RPE
TULP1	1.73e-188	1.44843	0.853	0.05	2.9e-184	2	TULP1	RPE
SLC45A2	7.21e-272	1.44033	0.897	0.016	1.21e-267	2	SLC45A2	RPE
SFRP1	4.19e-18	1.41986	0.75	0.452	7.02e-14	2	SFRP1	RPE
PCP4	4.24e-149	1.40182	0.814	0.067	7.1e-145	2	PCP4	RPE
IGFBP5	1.78e-49	1.38987	0.987	0.464	2.98e-45	2	IGFBP5	RPE
ENPP2	2.87e-111	1.38843	0.744	0.09	4.8e-107	2	ENPP2	RPE
ID3	8.78e-44	1.38627	1	0.809	1.47e-39	2	ID3	RPE
SLC7A5	7.21e-170	1.38133	0.872	0.068	1.21e-165	2	SLC7A5	RPE
FRZB	1.27e-88	1.34609	0.904	0.221	2.13e-84	2	FRZB	RPE
NET1	1.14e-67	1.32819	0.891	0.275	1.91e-63	2	NET1	RPE
CTSH	6.57e-169	1.32793	0.891	0.078	1.1e-164	2	CTSH	RPE
SGK1	3.91e-106	1.31551	0.821	0.124	6.54e-102	2	SGK1	RPE
PHACTR2	1.44e-74	1.31037	0.942	0.326	2.41e-70	2	PHACTR2	RPE
QPRT	4.61e-67	1.30186	0.955	0.438	7.72e-63	2	QPRT	RPE
OSBPL1A	1.93e-75	1.29001	0.962	0.383	3.23e-71	2	OSBPL1A	RPE
PLA2G16	1.01e-134	1.28664	0.84	0.092	1.69e-130	2	PLA2G16	RPE
CCDC51	2.12e-117	1.27058	0.84	0.126	3.55e-113	2	CCDC51	RPE
ELN	5.34e-78	1.26488	0.801	0.186	8.95e-74	2	ELN	RPE
CLCN3	2.18e-71	1.24125	0.923	0.331	3.64e-67	2	CLCN3	RPE
APOC1	1.3e-155	1.23928	0.795	0.059	2.19e-151	2	APOC1	RPE
RASSF8	3.38e-66	1.23212	0.949	0.344	5.67e-62	2	RASSF8	RPE
MEIS2	2.76e-124	1.23025	0.91	0.129	4.62e-120	2	MEIS2	RPE
LPL	1.71e-199	1.2291	0.712	0.018	2.86e-195	2	LPL	RPE
PGM5	4.03e-174	1.20057	0.801	0.048	6.74e-170	2	PGM5	RPE
ATP1B1	3.29e-54	1.17147	0.885	0.32	5.51e-50	2	ATP1B1	RPE
CST3	4.32e-48	1.17008	0.974	0.633	7.23e-44	2	CST3	RPE
DPP7	5.52e-79	1.16517	0.897	0.255	9.24e-75	2	DPP7	RPE
PSAT1	2.26e-76	1.14858	0.91	0.254	3.79e-72	2	PSAT1	RPE
CPVL	1.08e-123	1.13783	0.776	0.087	1.82e-119	2	CPVL	RPE
SESN3	1.7e-41	1.11843	0.891	0.458	2.85e-37	2	SESN3	RPE
HSBP1L1	4.57e-190	1.1181	0.744	0.026	7.65e-186	2	HSBP1L1	RPE
TPRN	1.68e-111	1.09189	0.75	0.092	2.82e-107	2	TPRN	RPE
CTSD	1.14e-68	1.08836	0.962	0.391	1.91e-64	2	CTSD	RPE
BRI3	4.45e-60	1.08744	1	0.787	7.46e-56	2	BRI3	RPE
CHCHD10	1.25e-56	1.08558	0.878	0.333	2.09e-52	2	CHCHD10	RPE
BACE2	3.97e-88	1.08189	0.808	0.161	6.64e-84	2	BACE2	RPE
SOSTDC1	6.82e-102	1.0808	0.776	0.107	1.14e-97	2	SOSTDC1	RPE
DHRS3	6.04e-42	1.05961	0.769	0.29	1.01e-37	2	DHRS3	RPE
MLANA	5.03e-211	1.05761	0.686	0.009	8.43e-207	2	MLANA	RPE
PRNP	7.17e-99	1.05072	0.808	0.136	1.2e-94	2	PRNP	RPE
STT3B	3.68e-60	1.04833	0.878	0.312	6.16e-56	2	STT3B	RPE
GPR180	2.11e-106	1.03958	0.737	0.092	3.54e-102	2	GPR180	RPE
FNIP2	2.23e-86	1.03498	0.821	0.17	3.73e-82	2	FNIP2	RPE
HOMER3	5.65e-45	1.00835	0.891	0.442	9.46e-41	2	HOMER3	RPE
CNDP1	1.47e-209	0.999554	0.712	0.014	2.46e-205	2	CNDP1	RPE
VEPH1	3.8e-208	0.998415	0.731	0.016	6.37e-204	2	VEPH1	RPE
FILIP1	2.44e-102	0.993501	0.667	0.071	4.09e-98	2	FILIP1	RPE
SLC7A6	1.82e-123	0.988489	0.75	0.076	3.04e-119	2	SLC7A6	RPE
PCMTD2	1.7e-63	0.988137	0.923	0.319	2.85e-59	2	PCMTD2	RPE
CDH7	1.66e-79	0.985045	0.712	0.121	2.78e-75	2	CDH7	RPE
MAB21L2	1.68e-68	0.983147	0.769	0.165	2.81e-64	2	MAB21L2	RPE
DRD4	5.5e-206	0.971793	0.699	0.013	9.21e-202	2	DRD4	RPE
APP1	3.34e-43	0.969002	0.994	0.63	5.6e-39	2	APP	RPE
MYRF	2.15e-185	0.967822	0.724	0.025	3.6e-181	2	MYRF	RPE
PDPN	1.88e-99	0.964214	0.776	0.111	3.15e-95	2	PDPN	RPE
ISYNA1	7.98e-42	0.95667	0.923	0.458	1.34e-37	2	ISYNA1	RPE
COLEC12	6.78e-73	0.950726	0.814	0.186	1.14e-68	2	COLEC12	RPE
PARD6B	9.5e-98	0.950298	0.622	0.066	1.59e-93	2	PARD6B	RPE
LINC01933	9.07e-154	0.947027	0.506	0.007	1.52e-149	2	LINC01933	RPE
FAM84B	2.48e-134	0.945416	0.731	0.06	4.16e-130	2	FAM84B	RPE
HIST3H2A	1.68e-45	0.941649	0.865	0.348	2.81e-41	2	HIST3H2A	RPE
SLC7A2	3.69e-117	0.941585	0.744	0.075	6.18e-113	2	SLC7A2	RPE
GRID2	3.93e-83	0.93594	0.718	0.111	6.58e-79	2	GRID2	RPE
LIN7A	3.55e-108	0.925796	0.679	0.068	5.94e-104	2	LIN7A	RPE
PLD5	5.87e-178	0.925573	0.712	0.025	9.84e-174	2	PLD5	RPE
SLC6A15	1.88e-146	0.924593	0.712	0.046	3.15e-142	2	SLC6A15	RPE
GSX2	8.66e-197	0.923497	0.622	0.007	1.45e-192	2	GSX2	RPE
SPARC1	1.86e-38	0.919427	1	0.72	3.11e-34	2	SPARC	RPE
WFDC1	4.74e-56	0.918813	0.404	0.046	7.93e-52	2	WFDC1	RPE
ZNF503	7.4e-46	0.916055	0.885	0.341	1.24e-41	2	ZNF503	RPE
VEGFB	6.65e-47	0.909268	0.929	0.432	1.11e-42	2	VEGFB	RPE
PSAP	2.13e-48	0.908459	0.942	0.463	3.57e-44	2	PSAP	RPE
CA14	7.07e-99	0.900077	0.744	0.104	1.19e-94	2	CA14	RPE
TMEM88	1.84e-123	0.899999	0.699	0.06	3.08e-119	2	TMEM88	RPE
SCT	5.91e-145	0.897001	0.532	0.014	9.9e-141	2	SCT	RPE
RAB27A	3.02e-88	0.881004	0.647	0.085	5.07e-84	2	RAB27A	RPE
MT-CO1	3.31e-55	0.880917	1	0.976	5.54e-51	2	MT-CO1	RPE
FAM129A	2.14e-191	0.874689	0.622	0.008	3.59e-187	2	FAM129A	RPE
GCA	9.28e-95	0.873375	0.75	0.113	1.55e-90	2	GCA	RPE
BCAM	1.07e-57	0.868456	0.821	0.241	1.79e-53	2	BCAM	RPE
FAM213A	5.1e-50	0.868294	0.981	0.545	8.55e-46	2	FAM213A	RPE
MT-CO2	9.32e-60	0.868099	1	0.969	1.56e-55	2	MT-CO2	RPE
BMP4	3.14e-61	0.866945	0.763	0.182	5.26e-57	2	BMP4	RPE
ABRACL	3.66e-81	0.865211	0.865	0.179	6.13e-77	2	ABRACL	RPE
ACP5	7.79e-197	0.851848	0.647	0.01	1.3e-192	2	ACP5	RPE
SLC16A8	5.01e-64	0.849525	0.423	0.045	8.4e-60	2	SLC16A8	RPE
CANX	2.05e-35	0.849181	0.923	0.545	3.43e-31	2	CANX	RPE
FTH1	1.76e-54	0.845929	1	0.986	2.95e-50	2	FTH1	RPE
BMP7	1.58e-73	0.843279	0.756	0.143	2.64e-69	2	BMP7	RPE
CPEB4	3.75e-56	0.834849	0.635	0.135	6.29e-52	2	CPEB4	RPE
TRAPPC2L	7.43e-45	0.831225	0.962	0.511	1.25e-40	2	TRAPPC2L	RPE
PCBD1	2.58e-48	0.827605	0.872	0.345	4.31e-44	2	PCBD1	RPE
LINC018331	1.03e-55	0.826273	0.833	0.215	1.72e-51	2	LINC01833	RPE
EMP2	3.46e-63	0.824808	0.788	0.204	5.79e-59	2	EMP2	RPE
COMT	5.71e-45	0.823249	0.917	0.393	9.56e-41	2	COMT	RPE
RBP1	3.71e-36	0.820823	1	0.814	6.21e-32	2	RBP1	RPE
HSD17B14	3.87e-94	0.819981	0.673	0.081	6.48e-90	2	HSD17B14	RPE
HES4	4.29e-33	0.819542	0.821	0.329	7.19e-29	2	HES4	RPE
WLS	2.54e-51	0.819531	0.853	0.277	4.25e-47	2	WLS	RPE
PRDX6	1.1e-41	0.818344	0.994	0.835	1.85e-37	2	PRDX6	RPE
FGFR3	1.23e-123	0.81442	0.564	0.029	2.06e-119	2	FGFR3	RPE
COX7A2L	5.8e-44	0.813059	0.981	0.765	9.72e-40	2	COX7A2L	RPE
SIX31	8.16e-43	0.811553	0.936	0.298	1.37e-38	2	SIX3	RPE
MXRA7	3.4e-47	0.811451	0.885	0.348	5.69e-43	2	MXRA7	RPE
TM7SF2	4.35e-62	0.808637	0.795	0.193	7.28e-58	2	TM7SF2	RPE
PDE1A	1.57e-150	0.80437	0.577	0.018	2.64e-146	2	PDE1A	RPE
SNCA	3.88e-60	0.804241	0.878	0.267	6.49e-56	2	SNCA	RPE
CYR611	2.98e-26	0.803797	0.981	0.684	5e-22	2	CYR61	RPE
CD63	5.37e-40	0.801845	0.987	0.853	9e-36	2	CD63	RPE
LHX21	1.37e-54	0.794715	0.872	0.223	2.29e-50	2	LHX2	RPE
SLC25A6	3.13e-45	0.794059	0.994	0.93	5.24e-41	2	SLC25A6	RPE
ATP1B3	2.51e-40	0.789774	0.91	0.43	4.21e-36	2	ATP1B3	RPE
MT-CO3	5.83e-50	0.78788	1	0.987	9.77e-46	2	MT-CO3	RPE
RBP7	5.88e-148	0.787096	0.506	0.009	9.86e-144	2	RBP7	RPE
RIC3	4.44e-52	0.786992	0.59	0.123	7.44e-48	2	RIC3	RPE
LMO1	1.33e-125	0.785902	0.513	0.02	2.23e-121	2	LMO1	RPE
TAX1BP1	7.27e-40	0.78453	0.949	0.505	1.22e-35	2	TAX1BP1	RPE
CISD1	1.99e-42	0.778253	0.75	0.266	3.33e-38	2	CISD1	RPE
ARL4C	1.81e-43	0.776279	0.846	0.29	3.03e-39	2	ARL4C	RPE
PEX7	5.32e-70	0.774942	0.628	0.106	8.91e-66	2	PEX7	RPE
RAB32	1.63e-37	0.773686	0.904	0.442	2.74e-33	2	RAB32	RPE
APLP2	3.93e-35	0.771155	0.949	0.552	6.58e-31	2	APLP2	RPE
PCOLCE2	1.61e-106	0.76904	0.615	0.053	2.7e-102	2	PCOLCE2	RPE
RFLNB	1.36e-46	0.75348	0.744	0.216	2.28e-42	2	RFLNB	RPE
REC8	1.28e-39	0.751814	0.763	0.275	2.15e-35	2	REC8	RPE
GOLGA4	2.15e-25	0.746087	0.878	0.522	3.6e-21	2	GOLGA4	RPE
NEU1	1.7e-55	0.744293	0.75	0.194	2.85e-51	2	NEU1	RPE
GNB3	9.26e-83	0.743997	0.449	0.034	1.55e-78	2	GNB3	RPE
SOX6	2.89e-104	0.740966	0.603	0.051	4.85e-100	2	SOX6	RPE
KCNAB1	5.9e-165	0.740395	0.59	0.014	9.88e-161	2	KCNAB1	RPE
SLC4A4	2.21e-85	0.739801	0.474	0.036	3.7e-81	2	SLC4A4	RPE
GNPDA1	5.98e-38	0.735302	0.833	0.359	1e-33	2	GNPDA1	RPE
CTBS	3.22e-35	0.730456	0.41	0.086	5.4e-31	2	CTBS	RPE
LDHB	4.32e-45	0.728912	1	0.906	7.23e-41	2	LDHB	RPE
KIF5C	5.62e-47	0.726855	0.756	0.21	9.41e-43	2	KIF5C	RPE
STK32C	8.88e-65	0.726264	0.609	0.107	1.49e-60	2	STK32C	RPE
GABRG3	1.16e-68	0.726014	0.481	0.055	1.94e-64	2	GABRG3	RPE
ISPD	2.29e-119	0.724229	0.545	0.028	3.83e-115	2	ISPD	RPE
BHLHE40	1.71e-139	0.72315	0.635	0.032	2.86e-135	2	BHLHE40	RPE
TNFRSF14	4.4e-161	0.722069	0.577	0.013	7.37e-157	2	TNFRSF14	RPE
SLC4A2	5.26e-73	0.716886	0.596	0.085	8.81e-69	2	SLC4A2	RPE
RARRES2	5.33e-33	0.71021	0.737	0.266	8.93e-29	2	RARRES2	RPE
MGST1	5.63e-44	0.71019	0.833	0.267	9.43e-40	2	MGST1	RPE
MMRN1	7.56e-83	0.708679	0.583	0.068	1.27e-78	2	MMRN1	RPE
CTSC	5.03e-28	0.708581	0.795	0.359	8.42e-24	2	CTSC	RPE
CFI	8.39e-43	0.707163	0.641	0.167	1.41e-38	2	CFI	RPE
LINC00982	3.1e-78	0.706107	0.5	0.048	5.2e-74	2	LINC00982	RPE
OSBPL8	1.12e-33	0.704982	0.891	0.438	1.88e-29	2	OSBPL8	RPE
FABP3	4.97e-118	0.698092	0.609	0.041	8.33e-114	2	FABP3	RPE
MAP9	2.23e-31	0.695095	0.782	0.344	3.73e-27	2	MAP9	RPE
STRA6	2.81e-56	0.694562	0.744	0.182	4.71e-52	2	STRA6	RPE
RTN3	2.37e-34	0.694269	0.968	0.571	3.98e-30	2	RTN3	RPE
VEGFA	3.57e-44	0.693207	0.788	0.256	5.98e-40	2	VEGFA	RPE
GALNT1	1.71e-33	0.689137	0.885	0.448	2.87e-29	2	GALNT1	RPE
PLTP	3.48e-59	0.687402	0.692	0.156	5.82e-55	2	PLTP	RPE
AC009501.1	1.69e-118	0.686726	0.513	0.023	2.83e-114	2	AC009501.1	RPE
ERP29	1.81e-33	0.685367	0.974	0.727	3.03e-29	2	ERP29	RPE
DNAJC3	1.83e-40	0.684022	0.731	0.247	3.06e-36	2	DNAJC3	RPE
COL8A1	9.92e-97	0.682288	0.442	0.022	1.66e-92	2	COL8A1	RPE
INO80C	6.54e-56	0.6819	0.718	0.178	1.1e-51	2	INO80C	RPE
AC006450.3	9.81e-81	0.681134	0.609	0.079	1.64e-76	2	AC006450.3	RPE
SLC29A4	4.12e-57	0.679898	0.622	0.124	6.91e-53	2	SLC29A4	RPE
ZDHHC2	1.68e-75	0.676744	0.622	0.092	2.81e-71	2	ZDHHC2	RPE
FUCA2	7.46e-33	0.675658	0.66	0.25	1.25e-28	2	FUCA2	RPE
RRAGD	9.36e-70	0.661343	0.577	0.081	1.57e-65	2	RRAGD	RPE
BMP2	1.74e-66	0.657812	0.577	0.085	2.92e-62	2	BMP2	RPE
TFEC	1.01e-165	0.652992	0.532	0.006	1.69e-161	2	TFEC	RPE
TIMP3	1.99e-42	0.642963	0.872	0.342	3.34e-38	2	TIMP3	RPE
PLAC9	5.55e-47	0.642187	0.821	0.238	9.3e-43	2	PLAC9	RPE
TEX2	2.64e-99	0.641961	0.513	0.035	4.42e-95	2	TEX2	RPE
LAMP2	4.92e-40	0.641936	0.782	0.273	8.23e-36	2	LAMP2	RPE
SH3GL2	6.99e-134	0.641127	0.468	0.01	1.17e-129	2	SH3GL2	RPE
GPRC5C	6.95e-77	0.640352	0.583	0.072	1.16e-72	2	GPRC5C	RPE
COL9A2	7.18e-49	0.639288	0.699	0.176	1.2e-44	2	COL9A2	RPE
MT-ND6	1.74e-25	0.637457	0.782	0.383	2.92e-21	2	MT-ND6	RPE
TUBB4A	1.86e-64	0.636516	0.526	0.071	3.12e-60	2	TUBB4A	RPE
CXADR	2.19e-37	0.635543	0.769	0.272	3.67e-33	2	CXADR	RPE
LOXL1	1.65e-36	0.632308	0.878	0.364	2.76e-32	2	LOXL1	RPE
BIRC7	1.27e-120	0.631407	0.474	0.016	2.13e-116	2	BIRC7	RPE
CTSV	2.02e-81	0.630942	0.474	0.04	3.38e-77	2	CTSV	RPE
USP18	1.06e-91	0.630309	0.455	0.027	1.77e-87	2	USP18	RPE
CTGF1	1.67e-11	0.626894	0.846	0.575	2.8e-07	2	CTGF	RPE
CUTA	4.7e-27	0.624288	0.981	0.746	7.88e-23	2	CUTA	RPE
BSG	8.56e-26	0.623328	0.968	0.66	1.43e-21	2	BSG	RPE
UGCG	4.66e-33	0.619128	0.673	0.239	7.81e-29	2	UGCG	RPE
VAT1L	3.8e-105	0.618385	0.481	0.025	6.37e-101	2	VAT1L	RPE
OCA2	6.65e-95	0.617561	0.545	0.044	1.11e-90	2	OCA2	RPE
SQSTM1	6.54e-34	0.610972	0.865	0.42	1.1e-29	2	SQSTM1	RPE
CSTB	5.84e-29	0.610161	0.974	0.646	9.78e-25	2	CSTB	RPE
FAM174B	1.72e-88	0.609885	0.5	0.039	2.89e-84	2	FAM174B	RPE
REEP5	1.03e-25	0.607904	0.821	0.402	1.73e-21	2	REEP5	RPE
METRNL	4.84e-32	0.604549	0.788	0.321	8.11e-28	2	METRNL	RPE
GCSH	1.67e-27	0.602796	0.929	0.544	2.8e-23	2	GCSH	RPE
BTG1	2.83e-20	0.601494	0.987	0.889	4.75e-16	2	BTG1	RPE
ITGA6	1.63e-81	0.600643	0.538	0.055	2.73e-77	2	ITGA6	RPE
GPX4	7.1e-28	0.600627	0.981	0.838	1.19e-23	2	GPX4	RPE
MT-ND4	2.61e-31	0.597649	1	0.947	4.37e-27	2	MT-ND4	RPE
SAMD11	3.59e-31	0.595845	0.526	0.15	6.01e-27	2	SAMD11	RPE
PEBP1	6.67e-32	0.593965	1	0.889	1.12e-27	2	PEBP1	RPE
CRTAP1	9.63e-28	0.591069	0.795	0.365	1.61e-23	2	CRTAP	RPE
SETDB2	2.12e-72	0.591041	0.59	0.08	3.56e-68	2	SETDB2	RPE
PAWR1	5.67e-44	0.590586	0.731	0.211	9.5e-40	2	PAWR	RPE
NMRK2	1.16e-135	0.590517	0.487	0.01	1.95e-131	2	NMRK2	RPE
SFRP5	1.99e-93	0.590164	0.301	0.003	3.33e-89	2	SFRP5	RPE
TPP1	3.07e-68	0.590081	0.564	0.08	5.15e-64	2	TPP1	RPE
ABHD2	3.65e-41	0.589131	0.487	0.101	6.11e-37	2	ABHD2	RPE
SLC9A3R1	1.76e-84	0.588811	0.545	0.055	2.94e-80	2	SLC9A3R1	RPE
ZNF330	2.06e-39	0.587719	0.744	0.252	3.45e-35	2	ZNF330	RPE
GALNT18	2.91e-109	0.587364	0.526	0.031	4.87e-105	2	GALNT18	RPE
SLC25A4	1.72e-35	0.587225	0.795	0.302	2.88e-31	2	SLC25A4	RPE
CTSF	7.41e-35	0.587024	0.724	0.253	1.24e-30	2	CTSF	RPE
NUDT14	1.27e-53	0.584749	0.609	0.124	2.13e-49	2	NUDT14	RPE
SLC5A6	3.89e-53	0.583973	0.551	0.104	6.51e-49	2	SLC5A6	RPE
DDR2	2.98e-36	0.579768	0.718	0.224	4.99e-32	2	DDR2	RPE
SCG5	1.18e-32	0.577358	0.724	0.251	1.97e-28	2	SCG5	RPE
C7orf50	3.29e-23	0.576809	0.91	0.547	5.51e-19	2	C7orf50	RPE
RELN	2.09e-49	0.576567	0.577	0.118	3.5e-45	2	RELN	RPE
NFE2L3	1.23e-102	0.575892	0.449	0.02	2.06e-98	2	NFE2L3	RPE
DCDC2	3.49e-91	0.572313	0.397	0.018	5.84e-87	2	DCDC2	RPE
SH3KBP1	7e-53	0.570075	0.538	0.094	1.17e-48	2	SH3KBP1	RPE
MT-ATP6	2.62e-33	0.569978	1	0.981	4.38e-29	2	MT-ATP6	RPE
ATP6V1B2	4.92e-36	0.568921	0.712	0.237	8.24e-32	2	ATP6V1B2	RPE
PDGFC	1.08e-36	0.568619	0.635	0.176	1.81e-32	2	PDGFC	RPE
AC015522.1	1.77e-130	0.568393	0.468	0.01	2.97e-126	2	AC015522.1	RPE
TM9SF3	2.21e-23	0.566367	0.833	0.46	3.71e-19	2	TM9SF3	RPE
GRN	4.34e-28	0.565635	0.724	0.303	7.26e-24	2	GRN	RPE
INPP1	2.76e-32	0.565089	0.526	0.152	4.63e-28	2	INPP1	RPE
NR2F11	1.16e-22	0.564701	0.91	0.463	1.94e-18	2	NR2F1	RPE
METTL9	4.75e-24	0.562289	0.974	0.739	7.97e-20	2	METTL9	RPE
RASGRF2	6.72e-126	0.558882	0.474	0.013	1.13e-121	2	RASGRF2	RPE
ADGRV1	5.57e-52	0.55473	0.5	0.083	9.34e-48	2	ADGRV1	RPE
TSPAN41	1.67e-20	0.553836	0.801	0.402	2.79e-16	2	TSPAN4	RPE
CNIH1	2.4e-26	0.5533	0.833	0.416	4.02e-22	2	CNIH1	RPE
PCSK2	3.57e-56	0.55217	0.487	0.066	5.98e-52	2	PCSK2	RPE
SSNA1	1.71e-25	0.549557	0.865	0.455	2.86e-21	2	SSNA1	RPE
LGMN	7.8e-49	0.547696	0.615	0.142	1.31e-44	2	LGMN	RPE
OTX1	2.05e-79	0.547452	0.506	0.048	3.43e-75	2	OTX1	RPE
TMEM147	8.34e-26	0.546421	0.904	0.497	1.4e-21	2	TMEM147	RPE
CCDC47	1.23e-24	0.543662	0.731	0.326	2.06e-20	2	CCDC47	RPE
FADS11	4.85e-23	0.540334	0.833	0.406	8.13e-19	2	FADS1	RPE
ID1	4.05e-15	0.540144	0.949	0.706	6.79e-11	2	ID1	RPE
NCOA3	4.27e-28	0.537949	0.577	0.19	7.16e-24	2	NCOA3	RPE
LAPTM4B	7.69e-24	0.534556	0.929	0.61	1.29e-19	2	LAPTM4B	RPE
RAB4A	4.68e-25	0.532476	0.859	0.469	7.84e-21	2	RAB4A	RPE
GPM6A1	4.39e-37	0.531699	0.821	0.255	7.36e-33	2	GPM6A	RPE
ZNF106	3.53e-25	0.526677	0.737	0.335	5.91e-21	2	ZNF106	RPE
PDGFA	8.67e-78	0.526609	0.481	0.042	1.45e-73	2	PDGFA	RPE
TLE4	2.29e-19	0.526604	0.846	0.472	3.83e-15	2	TLE4	RPE
CUBN	7.67e-92	0.523393	0.449	0.026	1.28e-87	2	CUBN	RPE
ZNF326	1.41e-21	0.52254	0.865	0.523	2.36e-17	2	ZNF326	RPE
MET	7.93e-77	0.521592	0.429	0.033	1.33e-72	2	MET	RPE
SH3BP5	7.92e-25	0.521189	0.788	0.359	1.33e-20	2	SH3BP5	RPE
RAB3IP	9.63e-51	0.52029	0.545	0.101	1.61e-46	2	RAB3IP	RPE
PDLIM2	3.26e-22	0.519248	0.737	0.345	5.46e-18	2	PDLIM2	RPE
SYPL1	1.77e-25	0.518655	0.795	0.369	2.97e-21	2	SYPL1	RPE
MPV17	2.95e-26	0.518647	0.782	0.372	4.94e-22	2	MPV17	RPE
PGM5-AS1	3.32e-67	0.517418	0.295	0.013	5.56e-63	2	PGM5-AS1	RPE
N4BP2L1	2.04e-47	0.514714	0.449	0.073	3.42e-43	2	N4BP2L1	RPE
DTNBP1	2.3e-36	0.511265	0.571	0.152	3.85e-32	2	DTNBP1	RPE
DNAJC1	4.59e-23	0.50993	0.788	0.389	7.7e-19	2	DNAJC1	RPE
SOX11	9.04e-20	0.508915	0.962	0.617	1.51e-15	2	SOX11	RPE
TGFBR3	9.68e-34	0.506004	0.468	0.109	1.62e-29	2	TGFBR3	RPE
LAIR2	2.93e-92	0.503874	0.321	0.006	4.9e-88	2	LAIR2	RPE
TMEM150C	7.74e-34	0.500676	0.346	0.061	1.3e-29	2	TMEM150C	RPE
NELL2	2.74e-15	0.500328	0.808	0.484	4.6e-11	2	NELL2	RPE
SYNE2	6.35e-19	0.500077	0.853	0.458	1.06e-14	2	SYNE2	RPE
DCN	4.02e-54	1.94312	0.979	0.501	6.73e-50	3	DCN	periocular mesenchyme
ITM2A	1.02e-40	1.80937	0.861	0.388	1.71e-36	3	ITM2A	periocular mesenchyme
OSR2	4.75e-60	1.64614	0.917	0.297	7.95e-56	3	OSR2	periocular mesenchyme
COL3A11	5.2e-45	1.46456	1	0.546	8.72e-41	3	COL3A1	periocular mesenchyme
PDGFRL	2.06e-75	1.41238	0.799	0.171	3.44e-71	3	PDGFRL	periocular mesenchyme
FOXL2	1.15e-75	1.41015	0.868	0.195	1.92e-71	3	FOXL2	periocular mesenchyme
POSTN	4e-32	1.32762	0.701	0.26	6.7e-28	3	POSTN	periocular mesenchyme
LUZP2	4.64e-71	1.3115	0.771	0.156	7.78e-67	3	LUZP2	periocular mesenchyme
TES	9.77e-52	1.29278	0.854	0.328	1.64e-47	3	TES	periocular mesenchyme
LGALS11	9.35e-37	1.26055	0.986	0.589	1.57e-32	3	LGALS1	periocular mesenchyme
TGFBI	4.8e-46	1.14685	0.868	0.333	8.05e-42	3	TGFBI	periocular mesenchyme
FBLN1	8.02e-31	1.13165	0.986	0.66	1.34e-26	3	FBLN1	periocular mesenchyme
ALX1	2.63e-46	1.1237	0.861	0.302	4.41e-42	3	ALX1	periocular mesenchyme
VIM1	7.2e-41	1.11897	1	0.991	1.21e-36	3	VIM	periocular mesenchyme
COL1A21	9.92e-33	1.0983	0.986	0.657	1.66e-28	3	COL1A2	periocular mesenchyme
KCTD121	1.72e-34	1.0842	0.764	0.322	2.89e-30	3	KCTD12	periocular mesenchyme
PLAT	1.49e-33	1.0791	0.549	0.155	2.49e-29	3	PLAT	periocular mesenchyme
PRRX11	5.72e-39	1.04631	0.861	0.37	9.58e-35	3	PRRX1	periocular mesenchyme
COL5A2	3.52e-39	1.03437	0.806	0.315	5.9e-35	3	COL5A2	periocular mesenchyme
FOXP2	2.3e-37	1.01407	0.84	0.377	3.86e-33	3	FOXP2	periocular mesenchyme
NFIB	6.43e-36	1.00932	0.875	0.422	1.08e-31	3	NFIB	periocular mesenchyme
EBF1	2.94e-32	1.00827	0.722	0.273	4.93e-28	3	EBF1	periocular mesenchyme
PCDH10	1.73e-36	0.983829	0.576	0.169	2.89e-32	3	PCDH10	periocular mesenchyme
FSTL11	1.31e-28	0.983047	0.875	0.528	2.2e-24	3	FSTL1	periocular mesenchyme
FBLN51	1.48e-42	0.971241	0.722	0.231	2.48e-38	3	FBLN5	periocular mesenchyme
ADAMTS1	2.35e-36	0.963062	0.688	0.249	3.94e-32	3	ADAMTS1	periocular mesenchyme
EGFL61	9.71e-29	0.959116	0.708	0.276	1.63e-24	3	EGFL6	periocular mesenchyme
NCAM2	5.07e-31	0.944897	0.479	0.13	8.49e-27	3	NCAM2	periocular mesenchyme
CRABP2	6.66e-32	0.944798	0.965	0.559	1.12e-27	3	CRABP2	periocular mesenchyme
CREB51	7.51e-29	0.941845	0.847	0.432	1.26e-24	3	CREB5	periocular mesenchyme
KCNQ1OT11	5.42e-25	0.935598	0.972	0.678	9.08e-21	3	KCNQ1OT1	periocular mesenchyme
COL6A21	9.96e-31	0.926113	0.917	0.47	1.67e-26	3	COL6A2	periocular mesenchyme
MT-ND5	6.2e-38	0.924893	0.993	0.845	1.04e-33	3	MT-ND5	periocular mesenchyme
SULT1E11	8.62e-17	0.924275	0.438	0.162	1.44e-12	3	SULT1E1	periocular mesenchyme
NRXN1	3e-21	0.920444	0.472	0.176	5.03e-17	3	NRXN1	periocular mesenchyme
SPOCK3	2.57e-09	0.918474	0.389	0.213	4.31e-05	3	SPOCK3	periocular mesenchyme
IL11RA1	2.8e-27	0.913013	0.799	0.372	4.7e-23	3	IL11RA	periocular mesenchyme
ARID5B	7.87e-31	0.909621	0.861	0.438	1.32e-26	3	ARID5B	periocular mesenchyme
EPHA7	3.72e-35	0.900479	0.688	0.243	6.24e-31	3	EPHA7	periocular mesenchyme
MEG3	6.04e-27	0.892966	0.972	0.618	1.01e-22	3	MEG3	periocular mesenchyme
RND3	8.63e-22	0.890746	0.882	0.586	1.45e-17	3	RND3	periocular mesenchyme
CTHRC11	3.53e-11	0.881226	0.549	0.304	5.91e-07	3	CTHRC1	periocular mesenchyme
RSPO2	1.6e-71	0.869917	0.306	0.012	2.69e-67	3	RSPO2	periocular mesenchyme
COL5A1	1.82e-34	0.868361	0.757	0.289	3.06e-30	3	COL5A1	periocular mesenchyme
MFAP41	1.65e-33	0.861405	0.854	0.359	2.76e-29	3	MFAP4	periocular mesenchyme
IGF2.1	4.45e-24	0.855391	0.576	0.222	7.46e-20	3	IGF2.1	periocular mesenchyme
CXCL12	2.38e-14	0.851062	0.521	0.249	3.99e-10	3	CXCL12	periocular mesenchyme
FLRT2	5.28e-24	0.848793	0.583	0.238	8.85e-20	3	FLRT2	periocular mesenchyme
IRF1	1.25e-19	0.838248	0.528	0.218	2.1e-15	3	IRF1	periocular mesenchyme
COL21A1	2.21e-22	0.836075	0.424	0.134	3.71e-18	3	COL21A1	periocular mesenchyme
MGST11	1.21e-20	0.832271	0.618	0.291	2.02e-16	3	MGST1	periocular mesenchyme
CCDC85A	8.25e-33	0.827775	0.528	0.154	1.38e-28	3	CCDC85A	periocular mesenchyme
OSR1	1.67e-58	0.825407	0.472	0.062	2.8e-54	3	OSR1	periocular mesenchyme
SULF1	6.64e-26	0.81199	0.701	0.288	1.11e-21	3	SULF1	periocular mesenchyme
PDGFRA	1.17e-26	0.806322	0.778	0.332	1.96e-22	3	PDGFRA	periocular mesenchyme
ITM2C1	1.23e-26	0.803288	0.944	0.676	2.06e-22	3	ITM2C	periocular mesenchyme
FN1	1.31e-27	0.794603	0.896	0.448	2.19e-23	3	FN1	periocular mesenchyme
PMP221	8.46e-29	0.790031	0.792	0.339	1.42e-24	3	PMP22	periocular mesenchyme
SNHG8	5.01e-22	0.789898	0.854	0.613	8.4e-18	3	SNHG8	periocular mesenchyme
LIMA1	3.31e-26	0.775382	0.708	0.322	5.55e-22	3	LIMA1	periocular mesenchyme
EDNRA	9.76e-27	0.759038	0.639	0.243	1.63e-22	3	EDNRA	periocular mesenchyme
GAS11	4.12e-16	0.74995	0.771	0.514	6.9e-12	3	GAS1	periocular mesenchyme
SPRY1	2.67e-27	0.749694	0.59	0.219	4.47e-23	3	SPRY1	periocular mesenchyme
FGF18	2.8e-19	0.742698	0.326	0.09	4.7e-15	3	FGF18	periocular mesenchyme
LY6E1	1.21e-19	0.738669	0.722	0.408	2.02e-15	3	LY6E	periocular mesenchyme
COL6A31	1.28e-19	0.736619	0.618	0.275	2.15e-15	3	COL6A3	periocular mesenchyme
SYNPO2	2.73e-23	0.734613	0.5	0.175	4.57e-19	3	SYNPO2	periocular mesenchyme
MXRA5	5.28e-23	0.73316	0.569	0.227	8.85e-19	3	MXRA5	periocular mesenchyme
LAPTM4A	2.6e-26	0.730821	0.986	0.803	4.36e-22	3	LAPTM4A	periocular mesenchyme
ZFP36L1	7.09e-20	0.7274	0.986	0.775	1.19e-15	3	ZFP36L1	periocular mesenchyme
MAGED21	1.49e-21	0.724059	0.986	0.828	2.5e-17	3	MAGED2	periocular mesenchyme
MEOX1	2.49e-28	0.72383	0.417	0.104	4.18e-24	3	MEOX1	periocular mesenchyme
COL12A1	3.22e-22	0.720049	0.535	0.2	5.4e-18	3	COL12A1	periocular mesenchyme
FBN1	3.7e-23	0.715511	0.708	0.351	6.2e-19	3	FBN1	periocular mesenchyme
LTBP4	2.04e-27	0.709834	0.736	0.346	3.41e-23	3	LTBP4	periocular mesenchyme
HIC1	6.01e-26	0.705671	0.59	0.209	1.01e-21	3	HIC1	periocular mesenchyme
CD99	2.1e-22	0.695879	0.903	0.657	3.51e-18	3	CD99	periocular mesenchyme
EPHB3	1.14e-28	0.686639	0.611	0.225	1.9e-24	3	EPHB3	periocular mesenchyme
COL6A1	7.16e-23	0.68628	0.854	0.525	1.2e-18	3	COL6A1	periocular mesenchyme
PLEKHA5	9.19e-20	0.685645	0.729	0.428	1.54e-15	3	PLEKHA5	periocular mesenchyme
ALCAM	2.37e-14	0.682308	0.521	0.254	3.97e-10	3	ALCAM	periocular mesenchyme
PCDH181	1.09e-22	0.680008	0.799	0.388	1.83e-18	3	PCDH18	periocular mesenchyme
COL1A11	5.61e-19	0.679928	0.938	0.523	9.4e-15	3	COL1A1	periocular mesenchyme
COL9A31	9.12e-11	0.676928	0.438	0.222	1.53e-06	3	COL9A3	periocular mesenchyme
PLAC91	1.9e-14	0.672429	0.542	0.268	3.17e-10	3	PLAC9	periocular mesenchyme
STAT31	4.08e-20	0.671553	0.847	0.497	6.84e-16	3	STAT3	periocular mesenchyme
LRRC17	2.32e-15	0.67082	0.708	0.395	3.89e-11	3	LRRC17	periocular mesenchyme
NRP1	9.35e-19	0.665527	0.556	0.246	1.57e-14	3	NRP1	periocular mesenchyme
MFAP21	2.94e-17	0.663858	0.833	0.521	4.92e-13	3	MFAP2	periocular mesenchyme
EMILIN11	1.12e-22	0.662468	0.667	0.297	1.88e-18	3	EMILIN1	periocular mesenchyme
FILIP1L	2.35e-15	0.654367	0.479	0.206	3.93e-11	3	FILIP1L	periocular mesenchyme
CNTN4	2.71e-15	0.651001	0.472	0.205	4.53e-11	3	CNTN4	periocular mesenchyme
LAMA4	6.58e-31	0.648037	0.59	0.187	1.1e-26	3	LAMA4	periocular mesenchyme
AFF3	1.84e-24	0.645445	0.458	0.147	3.08e-20	3	AFF3	periocular mesenchyme
SEMA3A	1.01e-13	0.644309	0.597	0.34	1.69e-09	3	SEMA3A	periocular mesenchyme
TWIST11	7.19e-20	0.641407	0.896	0.501	1.2e-15	3	TWIST1	periocular mesenchyme
FAP	3.24e-29	0.641133	0.569	0.18	5.44e-25	3	FAP	periocular mesenchyme
FBLN2	1.61e-25	0.639876	0.521	0.18	2.7e-21	3	FBLN2	periocular mesenchyme
VCAN1	2.59e-16	0.636824	0.854	0.559	4.34e-12	3	VCAN	periocular mesenchyme
MDK	1.04e-24	0.635705	0.986	0.914	1.74e-20	3	MDK	periocular mesenchyme
COL9A11	2.17e-05	0.63145	0.5	0.372	0.363318	3	COL9A1	periocular mesenchyme
BCHE	6.64e-09	0.627515	0.396	0.22	0.00011124	3	BCHE	periocular mesenchyme
DLC1	1.34e-22	0.625892	0.528	0.193	2.24e-18	3	DLC1	periocular mesenchyme
EIF3E	1.85e-29	0.624175	1	0.908	3.1e-25	3	EIF3E	periocular mesenchyme
NECAB1	8.72e-25	0.618576	0.333	0.076	1.46e-20	3	NECAB1	periocular mesenchyme
ZFHX4	2.5e-16	0.616218	0.722	0.419	4.19e-12	3	ZFHX4	periocular mesenchyme
CALD11	1.04e-17	0.615394	0.979	0.737	1.74e-13	3	CALD1	periocular mesenchyme
IGFBP4	1.53e-19	0.614898	0.701	0.386	2.57e-15	3	IGFBP4	periocular mesenchyme
SOCS31	1.5e-20	0.604173	0.833	0.454	2.51e-16	3	SOCS3	periocular mesenchyme
GLT8D21	6.72e-21	0.599865	0.632	0.279	1.13e-16	3	GLT8D2	periocular mesenchyme
CD811	2.58e-20	0.595845	0.986	0.814	4.32e-16	3	CD81	periocular mesenchyme
AP001528.2	1.9e-20	0.593615	0.278	0.064	3.18e-16	3	AP001528.2	periocular mesenchyme
IRX21	3.03e-11	0.592446	0.611	0.342	5.08e-07	3	IRX2	periocular mesenchyme
KLF4	1.63e-20	0.59149	0.542	0.218	2.72e-16	3	KLF4	periocular mesenchyme
PLK2	2.12e-15	0.582072	0.688	0.398	3.56e-11	3	PLK2	periocular mesenchyme
FCGRT1	1.03e-22	0.581981	0.715	0.331	1.72e-18	3	FCGRT	periocular mesenchyme
SPARC2	7.68e-16	0.576882	0.979	0.724	1.29e-11	3	SPARC	periocular mesenchyme
BICC1	4.57e-18	0.575524	0.458	0.178	7.65e-14	3	BICC1	periocular mesenchyme
DPP10	2.37e-13	0.572021	0.285	0.096	3.97e-09	3	DPP10	periocular mesenchyme
LEPROT	5.57e-18	0.565747	0.847	0.552	9.34e-14	3	LEPROT	periocular mesenchyme
EML4	3.86e-16	0.564468	0.688	0.42	6.47e-12	3	EML4	periocular mesenchyme
RUNX1T1	6.27e-20	0.5624	0.715	0.362	1.05e-15	3	RUNX1T1	periocular mesenchyme
PRSS23	7.29e-07	0.558792	0.465	0.309	0.0122064	3	PRSS23	periocular mesenchyme
EBF3	4.34e-15	0.557404	0.403	0.155	7.27e-11	3	EBF3	periocular mesenchyme
NOV	1.3e-11	0.555185	0.257	0.087	2.18e-07	3	NOV	periocular mesenchyme
C2orf401	2.45e-14	0.553729	0.472	0.216	4.1e-10	3	C2orf40	periocular mesenchyme
GLIPR2	4.62e-15	0.553572	0.493	0.237	7.74e-11	3	GLIPR2	periocular mesenchyme
TSHZ2	7.91e-17	0.552544	0.417	0.158	1.33e-12	3	TSHZ2	periocular mesenchyme
FZD21	3.17e-13	0.551537	0.736	0.497	5.32e-09	3	FZD2	periocular mesenchyme
SOCS1	1.5e-13	0.55001	0.521	0.262	2.51e-09	3	SOCS1	periocular mesenchyme
SELENOM	3.59e-17	0.549759	0.542	0.245	6.01e-13	3	SELENOM	periocular mesenchyme
GUCY1A2	5.91e-17	0.548953	0.34	0.11	9.91e-13	3	GUCY1A2	periocular mesenchyme
EPHA4	7.11e-08	0.548128	0.424	0.245	0.00119031	3	EPHA4	periocular mesenchyme
FLRT31	2.76e-09	0.546833	0.646	0.444	4.62e-05	3	FLRT3	periocular mesenchyme
ARHGAP20	8.7e-15	0.544183	0.299	0.093	1.46e-10	3	ARHGAP20	periocular mesenchyme
LINC01139	6.02e-32	0.541089	0.326	0.055	1.01e-27	3	LINC01139	periocular mesenchyme
EMP3	2.55e-16	0.534061	0.708	0.396	4.27e-12	3	EMP3	periocular mesenchyme
CDC42EP51	5.28e-18	0.533221	0.889	0.435	8.85e-14	3	CDC42EP5	periocular mesenchyme
RHOU	1.48e-12	0.530758	0.438	0.21	2.47e-08	3	RHOU	periocular mesenchyme
TBX15	2.68e-13	0.528221	0.361	0.135	4.49e-09	3	TBX15	periocular mesenchyme
ISLR	1.16e-25	0.527692	0.431	0.118	1.94e-21	3	ISLR	periocular mesenchyme
COL14A1	2.3e-20	0.526306	0.347	0.093	3.85e-16	3	COL14A1	periocular mesenchyme
OLFM2	2.66e-15	0.525662	0.688	0.402	4.46e-11	3	OLFM2	periocular mesenchyme
LDB2	4.75e-18	0.521214	0.375	0.125	7.95e-14	3	LDB2	periocular mesenchyme
COL16A1	2.35e-16	0.518859	0.375	0.128	3.94e-12	3	COL16A1	periocular mesenchyme
MDFIC	3.57e-14	0.518579	0.632	0.357	5.98e-10	3	MDFIC	periocular mesenchyme
KCNE4	1.88e-18	0.517052	0.319	0.09	3.14e-14	3	KCNE4	periocular mesenchyme
GPC6	1.87e-12	0.515587	0.507	0.282	3.14e-08	3	GPC6	periocular mesenchyme
CTSK1	1.21e-17	0.509914	0.66	0.314	2.02e-13	3	CTSK	periocular mesenchyme
LRP1	8.86e-11	0.509803	0.521	0.321	1.48e-06	3	LRP1	periocular mesenchyme
DLK1	5.44e-13	0.509048	0.347	0.125	9.11e-09	3	DLK1	periocular mesenchyme
ARL6IP5	2.32e-13	0.506256	0.854	0.621	3.89e-09	3	ARL6IP5	periocular mesenchyme
UBE2C	1.99e-77	3.07881	0.731	0.15	3.34e-73	4	UBE2C	proliferating cells
HIST1H4C	5.5e-39	3.03363	0.91	0.798	9.22e-35	4	HIST1H4C	proliferating cells
PTTG1	2.42e-53	2.64412	0.754	0.259	4.06e-49	4	PTTG1	proliferating cells
HMGB2	6.8e-61	2.54066	0.963	0.675	1.14e-56	4	HMGB2	proliferating cells
CCNB1	6.69e-51	2.53385	0.619	0.154	1.12e-46	4	CCNB1	proliferating cells
KPNA2	1.22e-25	2.4986	0.694	0.457	2.04e-21	4	KPNA2	proliferating cells
TOP2A	1.09e-50	2.48206	0.694	0.209	1.82e-46	4	TOP2A	proliferating cells
NUSAP1	1.26e-88	2.47957	0.769	0.139	2.12e-84	4	NUSAP1	proliferating cells
CDK1	1.35e-76	2.4017	0.716	0.14	2.27e-72	4	CDK1	proliferating cells
HIST1H1A	4.39e-35	2.24954	0.507	0.141	7.35e-31	4	HIST1H1A	proliferating cells
CENPF	2.14e-27	2.22139	0.59	0.243	3.59e-23	4	CENPF	proliferating cells
TUBB4B	5e-39	2.1737	0.881	0.697	8.38e-35	4	TUBB4B	proliferating cells
CDC20	1.61e-63	2.16285	0.537	0.08	2.7e-59	4	CDC20	proliferating cells
TUBA1B	1.96e-68	2.11344	1	0.94	3.29e-64	4	TUBA1B	proliferating cells
TUBA1C	1.16e-18	2.09489	0.582	0.342	1.94e-14	4	TUBA1C	proliferating cells
CKS1B	7.23e-48	2.0796	0.813	0.402	1.21e-43	4	CKS1B	proliferating cells
TPX2	1.77e-64	2.0292	0.612	0.11	2.96e-60	4	TPX2	proliferating cells
CCNB2	2.35e-30	1.9393	0.59	0.235	3.94e-26	4	CCNB2	proliferating cells
MKI67	1.73e-48	1.91977	0.552	0.118	2.9e-44	4	MKI67	proliferating cells
UBE2S	2.73e-38	1.91036	0.851	0.596	4.57e-34	4	UBE2S	proliferating cells
HIST1H1B	9.67e-39	1.89539	0.507	0.122	1.62e-34	4	HIST1H1B	proliferating cells
CKS2	1.92e-27	1.89187	0.649	0.339	3.21e-23	4	CKS2	proliferating cells
AURKB	7.82e-64	1.88988	0.597	0.105	1.31e-59	4	AURKB	proliferating cells
DLGAP5	3.49e-58	1.83055	0.522	0.083	5.85e-54	4	DLGAP5	proliferating cells
H2AFX	4.84e-34	1.82439	0.709	0.368	8.11e-30	4	H2AFX	proliferating cells
MAD2L1	3.7e-44	1.80507	0.687	0.236	6.19e-40	4	MAD2L1	proliferating cells
BIRC5	1.71e-53	1.74391	0.612	0.135	2.87e-49	4	BIRC5	proliferating cells
UBE2T	1.01e-54	1.73937	0.709	0.205	1.69e-50	4	UBE2T	proliferating cells
CDKN3	1.33e-42	1.7221	0.485	0.102	2.24e-38	4	CDKN3	proliferating cells
PBK	3.42e-60	1.6741	0.545	0.089	5.73e-56	4	PBK	proliferating cells
HIST1H1D	1.76e-14	1.65507	0.493	0.272	2.95e-10	4	HIST1H1D	proliferating cells
SMC4	1.33e-28	1.6435	0.657	0.321	2.23e-24	4	SMC4	proliferating cells
NEK2	1.07e-55	1.64167	0.455	0.062	1.78e-51	4	NEK2	proliferating cells
SGO2	1.87e-38	1.60557	0.455	0.098	3.14e-34	4	SGO2	proliferating cells
CENPA	1.06e-60	1.60196	0.418	0.044	1.77e-56	4	CENPA	proliferating cells
H2AFZ	6.36e-53	1.5926	0.978	0.893	1.07e-48	4	H2AFZ	proliferating cells
HMGN2	6.59e-49	1.57946	0.955	0.893	1.1e-44	4	HMGN2	proliferating cells
ARL6IP1	8.41e-09	1.53461	0.567	0.483	0.000140886	4	ARL6IP1	proliferating cells
PCLAF	2.04e-31	1.52076	0.679	0.292	3.41e-27	4	PCLAF	proliferating cells
HMGB3	4.16e-23	1.51321	0.739	0.59	6.98e-19	4	HMGB3	proliferating cells
GTSE1	4.81e-57	1.50074	0.485	0.07	8.06e-53	4	GTSE1	proliferating cells
CCNA2	1.63e-49	1.49702	0.47	0.076	2.74e-45	4	CCNA2	proliferating cells
HMGB1	5.23e-64	1.49391	1	0.965	8.76e-60	4	HMGB1	proliferating cells
PIMREG	2.27e-52	1.49143	0.493	0.081	3.8e-48	4	PIMREG	proliferating cells
TACC3	4.14e-62	1.45525	0.507	0.071	6.94e-58	4	TACC3	proliferating cells
CENPE	1.03e-24	1.4484	0.366	0.093	1.73e-20	4	CENPE	proliferating cells
PLK1	1.9e-50	1.44749	0.388	0.047	3.19e-46	4	PLK1	proliferating cells
ASPM	3.52e-26	1.44137	0.433	0.121	5.89e-22	4	ASPM	proliferating cells
CKAP2	5.73e-29	1.38332	0.507	0.163	9.6e-25	4	CKAP2	proliferating cells
CENPW	1.56e-31	1.37167	0.552	0.193	2.61e-27	4	CENPW	proliferating cells
CDCA3	1.33e-38	1.3677	0.425	0.082	2.23e-34	4	CDCA3	proliferating cells
NUF2	5.29e-41	1.36415	0.448	0.084	8.87e-37	4	NUF2	proliferating cells
AURKA	2.02e-46	1.36297	0.418	0.063	3.39e-42	4	AURKA	proliferating cells
TTK	2.04e-46	1.35702	0.44	0.071	3.41e-42	4	TTK	proliferating cells
BUB3	2.13e-20	1.33981	0.672	0.463	3.57e-16	4	BUB3	proliferating cells
NDC80	2.59e-49	1.33104	0.478	0.082	4.33e-45	4	NDC80	proliferating cells
ANP32E	8.55e-22	1.32992	0.746	0.558	1.43e-17	4	ANP32E	proliferating cells
KNSTRN	8.25e-21	1.32908	0.455	0.175	1.38e-16	4	KNSTRN	proliferating cells
MXD3	7.97e-46	1.32391	0.44	0.074	1.34e-41	4	MXD3	proliferating cells
PSRC1	4.1e-33	1.3234	0.418	0.096	6.86e-29	4	PSRC1	proliferating cells
NUCKS1	3.02e-36	1.31297	0.918	0.87	5.07e-32	4	NUCKS1	proliferating cells
KIF11	1.35e-47	1.30838	0.493	0.091	2.26e-43	4	KIF11	proliferating cells
KIF20B	6.77e-17	1.29474	0.448	0.193	1.13e-12	4	KIF20B	proliferating cells
CKAP2L	1.94e-46	1.29427	0.433	0.069	3.25e-42	4	CKAP2L	proliferating cells
HIST1H1C	6.17e-13	1.28695	0.47	0.244	1.03e-08	4	HIST1H1C	proliferating cells
TYMS	2.48e-22	1.27288	0.657	0.334	4.15e-18	4	TYMS	proliferating cells
DTYMK	6.46e-20	1.26921	0.619	0.356	1.08e-15	4	DTYMK	proliferating cells
MIS18BP1	8.66e-12	1.262	0.493	0.282	1.45e-07	4	MIS18BP1	proliferating cells
ECT2	8.68e-31	1.24726	0.425	0.101	1.45e-26	4	ECT2	proliferating cells
MZT1	4.27e-16	1.23386	0.53	0.293	7.16e-12	4	MZT1	proliferating cells
TMPO	3.22e-14	1.19716	0.701	0.625	5.39e-10	4	TMPO	proliferating cells
FBXO5	1.01e-20	1.1834	0.47	0.179	1.69e-16	4	FBXO5	proliferating cells
KIFC1	7.71e-45	1.17686	0.455	0.078	1.29e-40	4	KIFC1	proliferating cells
JPT1	3.48e-12	1.17388	0.754	0.755	5.83e-08	4	JPT1	proliferating cells
KIF2C	1.95e-42	1.16064	0.403	0.063	3.26e-38	4	KIF2C	proliferating cells
KIF22	6.17e-23	1.15813	0.515	0.211	1.03e-18	4	KIF22	proliferating cells
TROAP	2.58e-45	1.12804	0.336	0.038	4.33e-41	4	TROAP	proliferating cells
HMMR	2.25e-31	1.11315	0.343	0.063	3.77e-27	4	HMMR	proliferating cells
DEPDC1	2.04e-39	1.10808	0.396	0.066	3.42e-35	4	DEPDC1	proliferating cells
GPSM2	5.49e-16	1.10484	0.44	0.191	9.19e-12	4	GPSM2	proliferating cells
SPC25	5.94e-48	1.10358	0.463	0.074	9.95e-44	4	SPC25	proliferating cells
ZWINT	1e-28	1.10189	0.545	0.182	1.68e-24	4	ZWINT	proliferating cells
NCAPG	8.55e-34	1.05768	0.425	0.091	1.43e-29	4	NCAPG	proliferating cells
TUBB	1.91e-42	1.05343	0.993	0.953	3.21e-38	4	TUBB	proliferating cells
SGO1	1.33e-31	1.04434	0.418	0.096	2.22e-27	4	SGO1	proliferating cells
CDCA8	6e-30	1.04325	0.306	0.051	1e-25	4	CDCA8	proliferating cells
AGR2	4.21e-17	1.02786	0.134	0.016	7.05e-13	4	AGR2	proliferating cells
KIF15	2.71e-30	1.02715	0.381	0.08	4.54e-26	4	KIF15	proliferating cells
SMC2	2.3e-11	1.01996	0.515	0.329	3.85e-07	4	SMC2	proliferating cells
DBF4	9.85e-10	1.01809	0.418	0.232	1.65e-05	4	DBF4	proliferating cells
H1FX	1.93e-20	1.015	0.873	0.847	3.24e-16	4	H1FX	proliferating cells
ANLN	1.6e-35	1.00481	0.373	0.066	2.67e-31	4	ANLN	proliferating cells
KIF23	7.71e-35	1.00063	0.396	0.076	1.29e-30	4	KIF23	proliferating cells
STMN1	7.65e-38	0.999751	1	0.951	1.28e-33	4	STMN1	proliferating cells
H2AFV	4.99e-09	0.976272	0.642	0.669	8.36e-05	4	H2AFV	proliferating cells
HJURP	5.54e-40	0.969499	0.381	0.058	9.28e-36	4	HJURP	proliferating cells
LMNB1	3.11e-14	0.966551	0.604	0.389	5.22e-10	4	LMNB1	proliferating cells
HIST2H2AC	4.49e-07	0.959955	0.381	0.234	0.00752127	4	HIST2H2AC	proliferating cells
CENPK	2.28e-20	0.951808	0.485	0.18	3.83e-16	4	CENPK	proliferating cells
RAN	2.26e-28	0.947583	0.91	0.903	3.79e-24	4	RAN	proliferating cells
MND1	4.18e-21	0.945026	0.44	0.148	7e-17	4	MND1	proliferating cells
CDCA4	2.44e-15	0.937408	0.463	0.207	4.09e-11	4	CDCA4	proliferating cells
S100A111	6.09e-07	0.926953	0.619	0.479	0.0101985	4	S100A11	proliferating cells
TMSB15A	6.47e-11	0.925836	0.701	0.642	1.08e-06	4	TMSB15A	proliferating cells
BUB1	5.94e-37	0.924867	0.343	0.052	9.95e-33	4	BUB1	proliferating cells
TK1	3.18e-26	0.922661	0.41	0.103	5.32e-22	4	TK1	proliferating cells
CDCA2	8.34e-37	0.921551	0.321	0.044	1.4e-32	4	CDCA2	proliferating cells
PRC1	9.3e-31	0.919234	0.381	0.08	1.56e-26	4	PRC1	proliferating cells
HMGN3	7.36e-14	0.903469	0.791	0.804	1.23e-09	4	HMGN3	proliferating cells
POC1A	2.74e-23	0.898564	0.336	0.078	4.59e-19	4	POC1A	proliferating cells
KNL1	6.14e-23	0.886824	0.328	0.078	1.03e-18	4	KNL1	proliferating cells
CRNDE	1.93e-06	0.885609	0.507	0.396	0.0324143	4	CRNDE	proliferating cells
CENPM	2.31e-17	0.883391	0.403	0.141	3.88e-13	4	CENPM	proliferating cells
RACGAP1	1.18e-36	0.88028	0.373	0.063	1.97e-32	4	RACGAP1	proliferating cells
RAD21	1.55e-08	0.879653	0.642	0.605	0.000260115	4	RAD21	proliferating cells
ORC6	4.59e-13	0.87151	0.44	0.198	7.69e-09	4	ORC6	proliferating cells
CDCA5	3.07e-27	0.856347	0.358	0.076	5.15e-23	4	CDCA5	proliferating cells
RHEB	1.74e-08	0.855831	0.649	0.691	0.000292288	4	RHEB	proliferating cells
S100A10	3.06e-08	0.850674	0.47	0.27	0.000511817	4	S100A10	proliferating cells
CALM2	1.7e-21	0.850657	0.948	0.933	2.84e-17	4	CALM2	proliferating cells
SPAG5	3.2e-38	0.843815	0.366	0.057	5.37e-34	4	SPAG5	proliferating cells
NUDT1	5.44e-11	0.840183	0.5	0.296	9.11e-07	4	NUDT1	proliferating cells
HIST1H3B	3.18e-33	0.838912	0.336	0.054	5.33e-29	4	HIST1H3B	proliferating cells
DEK1	4.37e-09	0.835016	0.761	0.791	7.32e-05	4	DEK	proliferating cells
RAD51AP1	2.59e-23	0.83233	0.41	0.116	4.34e-19	4	RAD51AP1	proliferating cells
HIST1H2AG	1.65e-20	0.831265	0.328	0.086	2.76e-16	4	HIST1H2AG	proliferating cells
CENPN	2.08e-19	0.821471	0.41	0.136	3.48e-15	4	CENPN	proliferating cells
SKA2	2.09e-06	0.818292	0.515	0.424	0.0350631	4	SKA2	proliferating cells
NCAPD2	1.79e-18	0.816712	0.351	0.106	3e-14	4	NCAPD2	proliferating cells
HP1BP3	5.7e-06	0.814632	0.634	0.671	0.0955241	4	HP1BP3	proliferating cells
MELK	4.88e-28	0.812209	0.336	0.065	8.18e-24	4	MELK	proliferating cells
DNAJC9	1.49e-08	0.809285	0.493	0.311	0.000250132	4	DNAJC9	proliferating cells
COX8A	3.81e-08	0.800034	0.701	0.672	0.000637637	4	COX8A	proliferating cells
TUBB6	6.64e-10	0.792716	0.373	0.187	1.11e-05	4	TUBB6	proliferating cells
KIF14	6.07e-30	0.790051	0.269	0.038	1.02e-25	4	KIF14	proliferating cells
RANBP1	2.66e-08	0.786888	0.746	0.785	0.000445619	4	RANBP1	proliferating cells
KIF20A	4.91e-37	0.781352	0.313	0.042	8.23e-33	4	KIF20A	proliferating cells
HNRNPA2B1	4.75e-19	0.776628	0.918	0.953	7.96e-15	4	HNRNPA2B1	proliferating cells
EZH2	2.96e-08	0.775958	0.47	0.302	0.000495917	4	EZH2	proliferating cells
HIST1H1E	9.87e-09	0.774856	0.381	0.2	0.000165277	4	HIST1H1E	proliferating cells
LDHA	2.71e-15	0.767183	0.851	0.787	4.53e-11	4	LDHA	proliferating cells
CENPH	5.05e-10	0.765619	0.425	0.221	8.45e-06	4	CENPH	proliferating cells
PCNA1	0.00030332	0.764117	0.47	0.382	1	4	PCNA	proliferating cells
LSM5	5.31e-05	0.763411	0.582	0.567	0.889214	4	LSM5	proliferating cells
PARPBP	4.94e-21	0.762227	0.313	0.075	8.28e-17	4	PARPBP	proliferating cells
DDX39A	2.81e-09	0.75142	0.44	0.268	4.71e-05	4	DDX39A	proliferating cells
RRM1	5.61e-07	0.744982	0.47	0.309	0.00940612	4	RRM1	proliferating cells
LMNB2	1.06e-10	0.733985	0.373	0.171	1.78e-06	4	LMNB2	proliferating cells
PTMA	6.62e-31	0.733193	1	0.99	1.11e-26	4	PTMA	proliferating cells
CKAP5	0.000828713	0.732213	0.343	0.257	1	4	CKAP5	proliferating cells
KIF18A	3.94e-20	0.731066	0.284	0.065	6.61e-16	4	KIF18A	proliferating cells
ILF2	7.22e-09	0.730532	0.739	0.804	0.00012094	4	ILF2	proliferating cells
HMGN1	5.65e-21	0.729614	0.963	0.909	9.47e-17	4	HMGN1	proliferating cells
VDAC3	0.000226844	0.723725	0.59	0.617	1	4	VDAC3	proliferating cells
SPC24	4.05e-20	0.720387	0.269	0.056	6.79e-16	4	SPC24	proliferating cells
NASP1	2.69e-07	0.720329	0.806	0.81	0.00450138	4	NASP	proliferating cells
CDK5RAP2	3.25e-05	0.714905	0.41	0.288	0.544719	4	CDK5RAP2	proliferating cells
MRPL51	1.67e-08	0.714702	0.701	0.752	0.000279718	4	MRPL51	proliferating cells
FAM83D	5.99e-31	0.713716	0.261	0.034	1e-26	4	FAM83D	proliferating cells
CHEK1	5.65e-05	0.712021	0.321	0.194	0.946409	4	CHEK1	proliferating cells
PTMS	1.74e-08	0.711554	0.828	0.889	0.000292293	4	PTMS	proliferating cells
ANXA21	1.09e-06	0.703575	0.701	0.677	0.0182134	4	ANXA2	proliferating cells
RRM2	1.57e-21	0.700585	0.343	0.087	2.63e-17	4	RRM2	proliferating cells
RANGAP1	3.82e-11	0.700281	0.291	0.107	6.4e-07	4	RANGAP1	proliferating cells
PRR11	3.76e-33	0.699336	0.269	0.033	6.29e-29	4	PRR11	proliferating cells
BANF1	1.21e-09	0.695035	0.769	0.788	2.02e-05	4	BANF1	proliferating cells
PDLIM1	0.000299232	0.693344	0.149	0.07	1	4	PDLIM1	proliferating cells
LSM3	6.32e-06	0.692806	0.597	0.562	0.105849	4	LSM3	proliferating cells
EEF1B2	8.29e-20	0.689161	0.963	0.939	1.39e-15	4	EEF1B2	proliferating cells
PHF19	2.03e-16	0.688923	0.299	0.085	3.4e-12	4	PHF19	proliferating cells
SEPHS1	0.00014878	0.68568	0.5	0.456	1	4	SEPHS1	proliferating cells
CEP55	1.09e-36	0.684921	0.276	0.031	1.83e-32	4	CEP55	proliferating cells
SKA3	5.48e-23	0.683409	0.261	0.047	9.18e-19	4	SKA3	proliferating cells
BUB1B	7.46e-27	0.680918	0.306	0.056	1.25e-22	4	BUB1B	proliferating cells
NDE1	2.72e-17	0.677323	0.306	0.087	4.55e-13	4	NDE1	proliferating cells
HNRNPR	1.48e-08	0.675804	0.843	0.871	0.000247696	4	HNRNPR	proliferating cells
LSM4	7.38e-06	0.674409	0.634	0.635	0.123618	4	LSM4	proliferating cells
SNRPD1	3.25e-06	0.672044	0.694	0.691	0.054515	4	SNRPD1	proliferating cells
NT5DC2	0.000215251	0.665072	0.582	0.578	1	4	NT5DC2	proliferating cells
HIST1H2BH	7.91e-21	0.664325	0.261	0.053	1.33e-16	4	HIST1H2BH	proliferating cells
GAS2L3	1.95e-12	0.651987	0.254	0.08	3.27e-08	4	GAS2L3	proliferating cells
SNRPC	2.64e-06	0.650312	0.672	0.694	0.0442532	4	SNRPC	proliferating cells
RTKN2	9.91e-17	0.650246	0.313	0.09	1.66e-12	4	RTKN2	proliferating cells
UBALD2	0.000139483	0.648493	0.418	0.304	1	4	UBALD2	proliferating cells
RAC3	3.77e-05	0.642823	0.388	0.262	0.632013	4	RAC3	proliferating cells
TMEM106C	0.0024067	0.642408	0.425	0.359	1	4	TMEM106C	proliferating cells
CCDC34	3.55e-06	0.641013	0.537	0.427	0.0594434	4	CCDC34	proliferating cells
G2E3	0.000185342	0.639501	0.336	0.233	1	4	G2E3	proliferating cells
SRSF3	1.95e-13	0.637491	0.918	0.907	3.26e-09	4	SRSF3	proliferating cells
MGME1	1.67e-06	0.634999	0.396	0.23	0.0280086	4	MGME1	proliferating cells
ENO11	0.00136996	0.633619	0.813	0.831	1	4	ENO1	proliferating cells
C21orf58	2.31e-11	0.630113	0.306	0.111	3.87e-07	4	C21orf58	proliferating cells
HIST1H4E	0.000596997	0.629361	0.246	0.151	1	4	HIST1H4E	proliferating cells
CDC25B	6.69e-17	0.629349	0.284	0.074	1.12e-12	4	CDC25B	proliferating cells
CEP70	5.69e-05	0.622211	0.358	0.24	0.953952	4	CEP70	proliferating cells
SAE1	2.99e-05	0.62151	0.448	0.325	0.500543	4	SAE1	proliferating cells
EXOSC8	0.000583989	0.621273	0.478	0.404	1	4	EXOSC8	proliferating cells
SPDL1	2.24e-10	0.617917	0.313	0.131	3.75e-06	4	SPDL1	proliferating cells
KIF4A	1.32e-16	0.612019	0.261	0.065	2.22e-12	4	KIF4A	proliferating cells
CLSPN	0.000634637	0.610094	0.239	0.144	1	4	CLSPN	proliferating cells
VRK1	1.17e-06	0.60789	0.343	0.181	0.0196694	4	VRK1	proliferating cells
PTGES3	5.83e-09	0.607189	0.799	0.85	9.77e-05	4	PTGES3	proliferating cells
RFC3	2.67e-07	0.605153	0.321	0.162	0.00446477	4	RFC3	proliferating cells
ARPC5	0.00477753	0.602453	0.582	0.611	1	4	ARPC5	proliferating cells
CMC2	0.000382501	0.601276	0.41	0.316	1	4	CMC2	proliferating cells
FABP51	0.000637963	0.598404	0.694	0.724	1	4	FABP5	proliferating cells
RBMX	1.21e-07	0.596973	0.806	0.847	0.00203179	4	RBMX	proliferating cells
PERP	5.65e-05	0.595756	0.157	0.067	0.946137	4	PERP	proliferating cells
HNRNPA3	1.18e-07	0.593134	0.828	0.872	0.00197371	4	HNRNPA3	proliferating cells
FOXC11	5.76e-06	0.588249	0.515	0.349	0.0964471	4	FOXC1	proliferating cells
C19orf48	0.000523871	0.588077	0.478	0.391	1	4	C19orf48	proliferating cells
HNRNPF	0.00879932	0.58687	0.687	0.738	1	4	HNRNPF	proliferating cells
CDK4	0.00702314	0.581487	0.619	0.682	1	4	CDK4	proliferating cells
MIS18A	4.92e-06	0.579404	0.403	0.255	0.0824743	4	MIS18A	proliferating cells
DIAPH3	5.65e-18	0.578995	0.299	0.077	9.46e-14	4	DIAPH3	proliferating cells
RHNO1	1.49e-07	0.5761	0.366	0.199	0.00249246	4	RHNO1	proliferating cells
ANAPC11	0.00159263	0.57258	0.634	0.651	1	4	ANAPC11	proliferating cells
HNRNPA0	9.62e-06	0.570446	0.769	0.856	0.161241	4	HNRNPA0	proliferating cells
DAZAP1	0.00370074	0.567424	0.448	0.368	1	4	DAZAP1	proliferating cells
PSME2	0.00546488	0.565816	0.44	0.399	1	4	PSME2	proliferating cells
DCXR	0.00955595	0.563337	0.493	0.474	1	4	DCXR	proliferating cells
ERH	1.01e-08	0.561066	0.799	0.87	0.000169287	4	ERH	proliferating cells
ARHGAP11A	2.3e-15	0.560815	0.231	0.055	3.85e-11	4	ARHGAP11A	proliferating cells
PHGDH	0.000296686	0.55596	0.597	0.613	1	4	PHGDH	proliferating cells
CBX1	0.00530962	0.555413	0.634	0.731	1	4	CBX1	proliferating cells
CENPU	2.74e-08	0.550392	0.358	0.171	0.000459062	4	CENPU	proliferating cells
PSIP11	1.93e-06	0.550369	0.716	0.75	0.0323118	4	PSIP1	proliferating cells
MDH1	0.000787521	0.547104	0.649	0.728	1	4	MDH1	proliferating cells
CIP2A	8.79e-11	0.546243	0.291	0.107	1.47e-06	4	CIP2A	proliferating cells
MORF4L2	0.00647376	0.545034	0.649	0.761	1	4	MORF4L2	proliferating cells
DDAH2	1.34e-07	0.543029	0.769	0.823	0.0022505	4	DDAH2	proliferating cells
H2AFJ	0.00721795	0.541303	0.47	0.438	1	4	H2AFJ	proliferating cells
SRSF2	2.15e-05	0.540416	0.746	0.809	0.359759	4	SRSF2	proliferating cells
ZNF85	0.00392627	0.539244	0.261	0.171	1	4	ZNF85	proliferating cells
DYNLL1	6.11e-11	0.539194	0.858	0.931	1.02e-06	4	DYNLL1	proliferating cells
TMEM237	0.00199772	0.537918	0.343	0.245	1	4	TMEM237	proliferating cells
MNS1	3.38e-05	0.537655	0.306	0.176	0.56601	4	MNS1	proliferating cells
RNF26	3.48e-06	0.53207	0.299	0.159	0.0582184	4	RNF26	proliferating cells
2007-09-01	0.00013341	0.530519	0.739	0.85	1	4	2007-09-01	proliferating cells
YWHAH	0.000391732	0.530226	0.642	0.625	1	4	YWHAH	proliferating cells
FOXM1	1.45e-25	0.521155	0.306	0.058	2.43e-21	4	FOXM1	proliferating cells
DHFR	0.00301503	0.521065	0.299	0.202	1	4	DHFR	proliferating cells
HNRNPM	1.09e-09	0.517388	0.806	0.806	1.83e-05	4	HNRNPM	proliferating cells
SULT1E12	0.00222686	0.516967	0.284	0.177	1	4	SULT1E1	proliferating cells
SNRPB	6.28e-05	0.511371	0.716	0.79	1	4	SNRPB	proliferating cells
HYLS1	1.37e-06	0.511032	0.224	0.097	0.0229333	4	HYLS1	proliferating cells
HIST2H2BF	9.46e-08	0.509996	0.179	0.06	0.00158487	4	HIST2H2BF	proliferating cells
ESCO2	3.69e-15	0.509771	0.254	0.065	6.18e-11	4	ESCO2	proliferating cells
SRP9	0.00020103	0.507654	0.784	0.852	1	4	SRP9	proliferating cells
GLRX5	0.00035435	0.505928	0.619	0.676	1	4	GLRX5	proliferating cells
GAPDH	1.79e-11	0.504929	0.993	0.988	2.99e-07	4	GAPDH	proliferating cells
GGH	3.3e-05	0.504413	0.366	0.241	0.552213	4	GGH	proliferating cells
TMSB4X1	1.78e-07	0.502447	0.97	0.945	0.00298204	4	TMSB4X	proliferating cells
ARPC2	0.00762542	0.502275	0.687	0.782	1	4	ARPC2	proliferating cells
HNRNPDL	5.85e-07	0.501877	0.866	0.92	0.00980264	4	HNRNPDL	proliferating cells
CBX5	0.000199031	0.501458	0.687	0.73	1	4	CBX5	proliferating cells
PAFAH1B3	0.00740436	0.50044	0.694	0.749	1	4	PAFAH1B3	proliferating cells
ALX11	9.21e-78	2.39153	0.938	0.301	1.54e-73	5	ALX1	corneal endothelium
LUZP21	2.27e-84	2.06674	0.808	0.158	3.8e-80	5	LUZP2	corneal endothelium
OSR21	8.9e-68	1.87915	0.962	0.299	1.49e-63	5	OSR2	corneal endothelium
DLK11	1.46e-95	1.67891	0.738	0.094	2.44e-91	5	DLK1	corneal endothelium
FOXL21	1.59e-95	1.6558	0.954	0.194	2.66e-91	5	FOXL2	corneal endothelium
FGF7	3.39e-82	1.63186	0.623	0.079	5.69e-78	5	FGF7	corneal endothelium
CRLF1	1.09e-121	1.55594	0.615	0.038	1.82e-117	5	CRLF1	corneal endothelium
WNT2	2.74e-175	1.5444	0.785	0.037	4.59e-171	5	WNT2	corneal endothelium
TPM11	1.03e-42	1.50319	0.969	0.686	1.72e-38	5	TPM1	corneal endothelium
PDGFRL1	1.69e-66	1.43228	0.8	0.177	2.84e-62	5	PDGFRL	corneal endothelium
FBLN11	1.07e-44	1.42252	0.969	0.664	1.79e-40	5	FBLN1	corneal endothelium
PCDH9	9.41e-37	1.35852	0.738	0.293	1.58e-32	5	PCDH9	corneal endothelium
MEG31	5.85e-40	1.35508	1	0.618	9.8e-36	5	MEG3	corneal endothelium
ITM2A1	3.35e-18	1.34977	0.746	0.402	5.61e-14	5	ITM2A	corneal endothelium
COL1A22	1.55e-38	1.3358	1	0.659	2.6e-34	5	COL1A2	corneal endothelium
FOXP21	1.14e-47	1.31907	0.892	0.376	1.9e-43	5	FOXP2	corneal endothelium
KCNQ1OT12	3.95e-31	1.29303	0.985	0.68	6.63e-27	5	KCNQ1OT1	corneal endothelium
LOX	9.73e-38	1.28972	0.615	0.19	1.63e-33	5	LOX	corneal endothelium
SLIT3	3.16e-67	1.23887	0.654	0.116	5.29e-63	5	SLIT3	corneal endothelium
WNT5A	4.76e-40	1.23332	0.715	0.247	7.98e-36	5	WNT5A	corneal endothelium
NELL21	8.1e-43	1.22118	0.946	0.478	1.36e-38	5	NELL2	corneal endothelium
TES1	3.35e-44	1.19726	0.854	0.333	5.61e-40	5	TES	corneal endothelium
LGALS12	3.62e-35	1.18957	0.992	0.592	6.06e-31	5	LGALS1	corneal endothelium
CRABP21	3.86e-31	1.17464	0.923	0.567	6.46e-27	5	CRABP2	corneal endothelium
COL6A22	2.16e-33	1.14907	0.885	0.477	3.62e-29	5	COL6A2	corneal endothelium
BASP1	1.56e-41	1.12643	0.992	0.823	2.62e-37	5	BASP1	corneal endothelium
CXCL121	5.62e-21	1.11673	0.577	0.247	9.41e-17	5	CXCL12	corneal endothelium
SULF11	7.63e-34	1.11611	0.731	0.289	1.28e-29	5	SULF1	corneal endothelium
NFIB1	1.02e-38	1.10388	0.915	0.423	1.71e-34	5	NFIB	corneal endothelium
ANXA3	2.01e-71	1.0843	0.515	0.058	3.36e-67	5	ANXA3	corneal endothelium
2001-11-01	1.23e-17	1.06223	0.308	0.084	2.06e-13	5	NOV	corneal endothelium
CAT	1.69e-41	1.05513	0.762	0.286	2.84e-37	5	CAT	corneal endothelium
SOCS11	3.55e-32	1.0392	0.669	0.252	5.95e-28	5	SOCS1	corneal endothelium
TSHZ21	2.62e-38	1.03156	0.562	0.148	4.39e-34	5	TSHZ2	corneal endothelium
TMEFF2	3.43e-21	1.02885	0.538	0.222	5.75e-17	5	TMEFF2	corneal endothelium
PLAC92	4.59e-35	1.02726	0.708	0.257	7.69e-31	5	PLAC9	corneal endothelium
TBX151	6.18e-38	1.00993	0.531	0.123	1.04e-33	5	TBX15	corneal endothelium
EPHA71	1.51e-35	1.00543	0.708	0.245	2.53e-31	5	EPHA7	corneal endothelium
COL5A21	2.97e-23	0.993711	0.708	0.328	4.97e-19	5	COL5A2	corneal endothelium
ARID5B1	3.59e-26	0.982332	0.831	0.444	6.01e-22	5	ARID5B	corneal endothelium
SPON2	2.7e-62	0.981813	0.415	0.04	4.52e-58	5	SPON2	corneal endothelium
C3orf58	1.27e-21	0.959476	0.669	0.35	2.13e-17	5	C3orf58	corneal endothelium
TWIST12	3.07e-32	0.93784	0.954	0.499	5.15e-28	5	TWIST1	corneal endothelium
ZFP36L11	5.74e-28	0.936421	0.985	0.777	9.62e-24	5	ZFP36L1	corneal endothelium
CREB52	1.41e-32	0.935961	0.892	0.432	2.37e-28	5	CREB5	corneal endothelium
PLEKHA51	7.03e-28	0.910737	0.792	0.425	1.18e-23	5	PLEKHA5	corneal endothelium
RBPJ	1.52e-27	0.883685	0.938	0.678	2.54e-23	5	RBPJ	corneal endothelium
GATA3	3.21e-28	0.883361	0.454	0.121	5.38e-24	5	GATA3	corneal endothelium
KLF41	1.45e-32	0.877234	0.638	0.213	2.43e-28	5	KLF4	corneal endothelium
PDGFRA1	7.61e-32	0.872836	0.823	0.332	1.28e-27	5	PDGFRA	corneal endothelium
C1orf122	2.31e-20	0.872214	0.815	0.586	3.87e-16	5	C1orf122	corneal endothelium
FILIP1L1	1.38e-21	0.870891	0.531	0.204	2.31e-17	5	FILIP1L	corneal endothelium
FN11	1.64e-24	0.869434	0.869	0.455	2.75e-20	5	FN1	corneal endothelium
NCAM21	5.94e-32	0.866547	0.508	0.131	9.95e-28	5	NCAM2	corneal endothelium
ANOS1	1.23e-23	0.857861	0.308	0.067	2.06e-19	5	ANOS1	corneal endothelium
SPOCK31	4.72e-18	0.855503	0.5	0.205	7.91e-14	5	SPOCK3	corneal endothelium
CACNB4	1.82e-30	0.855065	0.431	0.104	3.05e-26	5	CACNB4	corneal endothelium
MFAP42	1.2e-27	0.851767	0.831	0.365	2.01e-23	5	MFAP4	corneal endothelium
FBN11	2.27e-21	0.849294	0.692	0.356	3.81e-17	5	FBN1	corneal endothelium
DPP101	4.7e-38	0.848236	0.438	0.085	7.88e-34	5	DPP10	corneal endothelium
COL6A11	5.55e-27	0.842519	0.885	0.526	9.3e-23	5	COL6A1	corneal endothelium
KIAA1551	8.03e-20	0.838439	0.569	0.275	1.35e-15	5	KIAA1551	corneal endothelium
TGFBI1	5.78e-27	0.830625	0.808	0.343	9.68e-23	5	TGFBI	corneal endothelium
CCDC85A1	4.14e-34	0.830516	0.562	0.154	6.94e-30	5	CCDC85A	corneal endothelium
TPBG	4.83e-22	0.828884	0.808	0.437	8.09e-18	5	TPBG	corneal endothelium
EPS8	5.29e-26	0.820757	0.623	0.257	8.87e-22	5	EPS8	corneal endothelium
MGST12	4.81e-19	0.819795	0.623	0.294	8.06e-15	5	MGST1	corneal endothelium
ZFHX41	2.15e-19	0.816876	0.708	0.423	3.6e-15	5	ZFHX4	corneal endothelium
EGFL62	1.4e-27	0.814199	0.746	0.277	2.35e-23	5	EGFL6	corneal endothelium
ANKRD29	7.03e-27	0.81081	0.454	0.127	1.18e-22	5	ANKRD29	corneal endothelium
MT-ND51	1.07e-27	0.810624	1	0.846	1.79e-23	5	MT-ND5	corneal endothelium
ARHGAP201	1.61e-34	0.803153	0.423	0.085	2.7e-30	5	ARHGAP20	corneal endothelium
COL3A12	2.64e-23	0.798155	0.985	0.551	4.43e-19	5	COL3A1	corneal endothelium
RUNX1T11	1.55e-26	0.796558	0.785	0.359	2.59e-22	5	RUNX1T1	corneal endothelium
LTBP11	2.26e-16	0.789021	0.6	0.305	3.78e-12	5	LTBP1	corneal endothelium
C12orf75	1.27e-20	0.784698	0.592	0.277	2.14e-16	5	C12orf75	corneal endothelium
EBF11	3.07e-23	0.779794	0.677	0.28	5.15e-19	5	EBF1	corneal endothelium
AK5	1.98e-55	0.76958	0.415	0.047	3.32e-51	5	AK5	corneal endothelium
CLMP1	6.57e-28	0.767226	0.738	0.293	1.1e-23	5	CLMP	corneal endothelium
LAMB11	1.19e-25	0.763178	0.723	0.305	1.99e-21	5	LAMB1	corneal endothelium
IGFBP2	7.39e-18	0.762034	0.946	0.818	1.24e-13	5	IGFBP2	corneal endothelium
NRP11	1.06e-17	0.750825	0.554	0.249	1.78e-13	5	NRP1	corneal endothelium
ACKR3	3.06e-19	0.745596	0.592	0.263	5.12e-15	5	ACKR3	corneal endothelium
MALAT1	1.56e-32	0.740376	1	0.998	2.61e-28	5	MALAT1	corneal endothelium
PCDH101	8.73e-17	0.734871	0.462	0.182	1.46e-12	5	PCDH10	corneal endothelium
CDKN1C	3.91e-16	0.726497	0.892	0.664	6.55e-12	5	CDKN1C	corneal endothelium
FIBIN1	2.53e-18	0.726217	0.546	0.213	4.24e-14	5	FIBIN	corneal endothelium
AKAP12	4.44e-14	0.722908	0.785	0.563	7.43e-10	5	AKAP12	corneal endothelium
CAMK2D	4.08e-15	0.714285	0.538	0.284	6.83e-11	5	CAMK2D	corneal endothelium
SEMA3C	4.22e-28	0.712407	0.338	0.064	7.07e-24	5	SEMA3C	corneal endothelium
RDH10	5.68e-14	0.712311	0.431	0.184	9.51e-10	5	RDH10	corneal endothelium
TMEM59L	4.25e-39	0.71095	0.415	0.072	7.13e-35	5	TMEM59L	corneal endothelium
SMARCA2	6.67e-20	0.708415	0.569	0.254	1.12e-15	5	SMARCA2	corneal endothelium
DLC11	1.98e-15	0.706338	0.469	0.2	3.31e-11	5	DLC1	corneal endothelium
IGFBP6	7.21e-17	0.703131	0.492	0.204	1.21e-12	5	IGFBP6	corneal endothelium
MFAP22	7.81e-19	0.702318	0.854	0.522	1.31e-14	5	MFAP2	corneal endothelium
SNCAIP	1.45e-22	0.702232	0.5	0.184	2.44e-18	5	SNCAIP	corneal endothelium
CSRP2	3.23e-16	0.699668	0.877	0.637	5.4e-12	5	CSRP2	corneal endothelium
COL1A12	8.99e-20	0.689196	0.969	0.524	1.51e-15	5	COL1A1	corneal endothelium
ALCAM1	1.67e-21	0.687722	0.615	0.248	2.79e-17	5	ALCAM	corneal endothelium
TUSC1	2.1e-18	0.687318	0.631	0.338	3.52e-14	5	TUSC1	corneal endothelium
BNC2	1.86e-25	0.686844	0.485	0.147	3.11e-21	5	BNC2	corneal endothelium
LHFPL2	7.52e-20	0.680884	0.446	0.16	1.26e-15	5	LHFPL2	corneal endothelium
ABCA5	5.17e-22	0.680755	0.377	0.106	8.66e-18	5	ABCA5	corneal endothelium
COL5A11	1.49e-22	0.676026	0.685	0.299	2.5e-18	5	COL5A1	corneal endothelium
CCDC80	1.51e-16	0.661679	0.638	0.336	2.53e-12	5	CCDC80	corneal endothelium
NTRK2	1.62e-30	0.661209	0.285	0.04	2.72e-26	5	NTRK2	corneal endothelium
RND31	1.47e-14	0.659008	0.846	0.592	2.46e-10	5	RND3	corneal endothelium
FLRT32	9.24e-10	0.654072	0.646	0.446	1.55e-05	5	FLRT3	corneal endothelium
DAAM2	3.67e-28	0.651674	0.408	0.099	6.14e-24	5	DAAM2	corneal endothelium
SNAI2	5.74e-13	0.651559	0.446	0.199	9.62e-09	5	SNAI2	corneal endothelium
ID2	8.66e-10	0.645013	0.862	0.675	1.45e-05	5	ID2	corneal endothelium
PRRX12	4.38e-14	0.644535	0.7	0.388	7.34e-10	5	PRRX1	corneal endothelium
AHNAK	1.81e-17	0.640565	0.615	0.303	3.03e-13	5	AHNAK	corneal endothelium
SNHG81	3.82e-15	0.636503	0.854	0.615	6.4e-11	5	SNHG8	corneal endothelium
FAP1	2.34e-23	0.635062	0.538	0.186	3.91e-19	5	FAP	corneal endothelium
SH3GL3	3.41e-30	0.63437	0.438	0.108	5.71e-26	5	SH3GL3	corneal endothelium
EPHB31	2.73e-21	0.632433	0.577	0.231	4.58e-17	5	EPHB3	corneal endothelium
MDFIC1	1.01e-15	0.631088	0.646	0.358	1.7e-11	5	MDFIC	corneal endothelium
PEG10	1.54e-06	0.630458	0.531	0.383	0.0258183	5	PEG10	corneal endothelium
FAM43A	3.32e-18	0.628179	0.377	0.122	5.57e-14	5	FAM43A	corneal endothelium
IGFBP41	8.88e-16	0.62097	0.692	0.389	1.49e-11	5	IGFBP4	corneal endothelium
PRDM6	9.06e-35	0.620406	0.292	0.037	1.52e-30	5	PRDM6	corneal endothelium
CNTFR	9.45e-17	0.616948	0.562	0.268	1.58e-12	5	CNTFR	corneal endothelium
ALDH7A1	1.8e-09	0.614819	0.692	0.535	3.02e-05	5	ALDH7A1	corneal endothelium
HIC11	2.29e-18	0.613605	0.546	0.216	3.84e-14	5	HIC1	corneal endothelium
NR2F2	0.000222149	0.610297	0.638	0.538	1	5	NR2F2	corneal endothelium
COL16A11	8.02e-30	0.609575	0.469	0.122	1.34e-25	5	COL16A1	corneal endothelium
DHRS31	2.29e-20	0.606809	0.685	0.305	3.83e-16	5	DHRS3	corneal endothelium
TLE1	2.46e-10	0.606133	0.585	0.386	4.11e-06	5	TLE1	corneal endothelium
ITM2C2	4.06e-15	0.601098	0.938	0.679	6.79e-11	5	ITM2C	corneal endothelium
ARHGEF40	2.07e-17	0.599509	0.577	0.285	3.47e-13	5	ARHGEF40	corneal endothelium
CHD3	1.16e-14	0.599229	0.715	0.452	1.94e-10	5	CHD3	corneal endothelium
VIM2	1.09e-23	0.594495	1	0.991	1.83e-19	5	VIM	corneal endothelium
AFF31	8.99e-19	0.590049	0.438	0.151	1.51e-14	5	AFF3	corneal endothelium
SERPINB6	1.4e-12	0.585184	0.769	0.535	2.35e-08	5	SERPINB6	corneal endothelium
IGF2.11	8.41e-14	0.585097	0.508	0.23	1.41e-09	5	IGF2.1	corneal endothelium
CDC42EP52	2.67e-17	0.58065	0.892	0.439	4.47e-13	5	CDC42EP5	corneal endothelium
C1S	4.08e-17	0.580431	0.331	0.099	6.84e-13	5	C1S	corneal endothelium
CALD12	3.06e-15	0.579931	0.985	0.739	5.13e-11	5	CALD1	corneal endothelium
AC245595.1	8.49e-10	0.57878	0.492	0.305	1.42e-05	5	AC245595.1	corneal endothelium
RGS2	2.43e-10	0.578294	0.485	0.275	4.07e-06	5	RGS2	corneal endothelium
RARG	1.47e-16	0.57779	0.492	0.207	2.47e-12	5	RARG	corneal endothelium
FBLN52	1.27e-20	0.575984	0.608	0.245	2.12e-16	5	FBLN5	corneal endothelium
PAX3	5.57e-22	0.575426	0.2	0.028	9.33e-18	5	PAX3	corneal endothelium
SMYD3	6.82e-13	0.570164	0.477	0.245	1.14e-08	5	SMYD3	corneal endothelium
ARL6IP51	6.82e-13	0.569845	0.831	0.625	1.14e-08	5	ARL6IP5	corneal endothelium
CSAD	2.96e-11	0.56513	0.531	0.314	4.95e-07	5	CSAD	corneal endothelium
TFPI	4.42e-27	0.563578	0.323	0.061	7.41e-23	5	TFPI	corneal endothelium
FGF181	7.47e-16	0.560836	0.315	0.093	1.25e-11	5	FGF18	corneal endothelium
CRYL1	2.57e-18	0.560622	0.438	0.165	4.31e-14	5	CRYL1	corneal endothelium
HIF3A	1.07e-17	0.560064	0.554	0.253	1.8e-13	5	HIF3A	corneal endothelium
LAPTM4A1	1.26e-16	0.560063	0.969	0.806	2.11e-12	5	LAPTM4A	corneal endothelium
FHL31	3.84e-14	0.548298	0.592	0.303	6.43e-10	5	FHL3	corneal endothelium
KIF13A	2.04e-13	0.54786	0.408	0.175	3.41e-09	5	KIF13A	corneal endothelium
MAP1LC3A	7.41e-15	0.54674	0.631	0.35	1.24e-10	5	MAP1LC3A	corneal endothelium
FJX1	1.55e-07	0.542914	0.477	0.303	0.00258892	5	FJX1	corneal endothelium
FDCSP	3.71e-35	0.542903	0.177	0.01	6.21e-31	5	FDCSP	corneal endothelium
CNTN5	4.12e-22	0.541729	0.354	0.09	6.91e-18	5	CNTN5	corneal endothelium
NLGN4X	3.96e-22	0.540922	0.354	0.091	6.64e-18	5	NLGN4X	corneal endothelium
TMEM108	5.65e-31	0.53836	0.331	0.056	9.47e-27	5	TMEM108	corneal endothelium
SULF2	4.31e-14	0.534672	0.485	0.23	7.22e-10	5	SULF2	corneal endothelium
TBX22	2.33e-20	0.533989	0.254	0.049	3.9e-16	5	TBX22	corneal endothelium
CACHD1	7.88e-12	0.521498	0.408	0.186	1.32e-07	5	CACHD1	corneal endothelium
ASXL3	2.69e-10	0.516655	0.392	0.193	4.51e-06	5	ASXL3	corneal endothelium
TMEM1191	4.13e-16	0.51514	0.423	0.16	6.92e-12	5	TMEM119	corneal endothelium
INHBA	5.99e-08	0.506295	0.254	0.104	0.00100273	5	INHBA	corneal endothelium
MDK1	1.32e-16	0.502134	1	0.914	2.22e-12	5	MDK	corneal endothelium
BTG11	9.13e-10	0.502109	1	0.89	1.53e-05	5	BTG1	corneal endothelium
KIF26B	2.12e-13	0.501757	0.3	0.101	3.55e-09	5	KIF26B	corneal endothelium
PTH1R	9.97e-13	0.500214	0.538	0.271	1.67e-08	5	PTH1R	corneal endothelium
POSTN1	1.17e-53	2.25206	0.838	0.258	1.95e-49	6	POSTN	periocular mesenchyme
DCN1	1.09e-53	2.24178	0.991	0.508	1.83e-49	6	DCN	periocular mesenchyme
PTN1	4.39e-37	2.08751	0.889	0.474	7.35e-33	6	PTN	periocular mesenchyme
OGN1	3.84e-65	1.82321	0.752	0.148	6.44e-61	6	OGN	periocular mesenchyme
PLAT1	1.1e-65	1.68422	0.752	0.147	1.84e-61	6	PLAT	periocular mesenchyme
FN12	1.63e-45	1.65448	0.94	0.453	2.73e-41	6	FN1	periocular mesenchyme
SIX1	4.62e-90	1.46717	0.778	0.109	7.74e-86	6	SIX1	periocular mesenchyme
GAS2	4.5e-65	1.44986	0.803	0.174	7.53e-61	6	GAS2	periocular mesenchyme
ITM2A2	2.08e-31	1.43076	0.855	0.397	3.48e-27	6	ITM2A	periocular mesenchyme
VCAN2	1.83e-35	1.41015	0.974	0.556	3.06e-31	6	VCAN	periocular mesenchyme
COL3A13	3.67e-33	1.37685	0.974	0.556	6.15e-29	6	COL3A1	periocular mesenchyme
JUNB1	2.38e-30	1.35512	0.94	0.605	3.99e-26	6	JUNB	periocular mesenchyme
EPHA41	5.08e-50	1.30866	0.795	0.221	8.51e-46	6	EPHA4	periocular mesenchyme
STOM	6.91e-60	1.27191	0.752	0.171	1.16e-55	6	STOM	periocular mesenchyme
TGFBI2	2.72e-41	1.20443	0.897	0.34	4.56e-37	6	TGFBI	periocular mesenchyme
NR2F21	1.17e-35	1.1998	0.932	0.517	1.96e-31	6	NR2F2	periocular mesenchyme
IGFBP21	1.7e-31	1.19813	0.983	0.816	2.84e-27	6	IGFBP2	periocular mesenchyme
SCX1	1.4e-30	1.16124	0.462	0.105	2.35e-26	6	SCX	periocular mesenchyme
MGP1	2.11e-09	1.12562	0.393	0.175	3.53e-05	6	MGP	periocular mesenchyme
MEOX11	2.04e-80	1.08936	0.701	0.088	3.42e-76	6	MEOX1	periocular mesenchyme
CTHRC12	1.13e-22	1.08805	0.709	0.296	1.89e-18	6	CTHRC1	periocular mesenchyme
STAT32	1.59e-30	1.03793	0.915	0.498	2.67e-26	6	STAT3	periocular mesenchyme
LRRC171	1.91e-27	1.0292	0.821	0.392	3.2e-23	6	LRRC17	periocular mesenchyme
HIC12	1.02e-40	1.02724	0.726	0.206	1.71e-36	6	HIC1	periocular mesenchyme
COL21A11	1.61e-48	1.0055	0.624	0.124	2.7e-44	6	COL21A1	periocular mesenchyme
COL6A32	2.75e-35	0.993024	0.778	0.269	4.6e-31	6	COL6A3	periocular mesenchyme
PDGFRA2	2.04e-30	0.991907	0.829	0.336	3.42e-26	6	PDGFRA	periocular mesenchyme
BMP3	4.56e-57	0.980629	0.462	0.053	7.64e-53	6	BMP3	periocular mesenchyme
GAS12	1.33e-27	0.977093	0.923	0.507	2.22e-23	6	GAS1	periocular mesenchyme
PLXNC1	2.44e-43	0.974941	0.632	0.153	4.09e-39	6	PLXNC1	periocular mesenchyme
2006-09-01	3.99e-33	0.972441	0.838	0.4	6.68e-29	6	2006-09-01	periocular mesenchyme
COL1A23	1.02e-23	0.962179	1	0.662	1.71e-19	6	COL1A2	periocular mesenchyme
IGF2.12	1.62e-33	0.936151	0.692	0.219	2.72e-29	6	IGF2.1	periocular mesenchyme
MDFI1	9.95e-28	0.920677	0.821	0.379	1.67e-23	6	MDFI	periocular mesenchyme
MMP16	4.14e-40	0.904291	0.624	0.158	6.93e-36	6	MMP16	periocular mesenchyme
VIM3	3.96e-18	0.903837	1	0.991	6.63e-14	6	VIM	periocular mesenchyme
PTX3	5.06e-17	0.902988	0.496	0.196	8.47e-13	6	PTX3	periocular mesenchyme
RRBP11	9.46e-30	0.897474	0.872	0.407	1.59e-25	6	RRBP1	periocular mesenchyme
TM4SF11	1.4e-33	0.892466	0.598	0.142	2.35e-29	6	TM4SF1	periocular mesenchyme
SIX21	8.66e-35	0.888396	0.556	0.127	1.45e-30	6	SIX2	periocular mesenchyme
OSR22	3.9e-25	0.877424	0.829	0.314	6.53e-21	6	OSR2	periocular mesenchyme
FAP2	2.9e-38	0.867575	0.684	0.178	4.85e-34	6	FAP	periocular mesenchyme
PKDCC1	1.1e-20	0.854219	0.786	0.401	1.84e-16	6	PKDCC	periocular mesenchyme
ALKAL2	1.47e-16	0.852602	0.179	0.029	2.47e-12	6	ALKAL2	periocular mesenchyme
S100A112	1.45e-26	0.847134	0.949	0.456	2.43e-22	6	S100A11	periocular mesenchyme
ROBO11	7.74e-29	0.845248	0.718	0.281	1.3e-24	6	ROBO1	periocular mesenchyme
KCNQ1OT13	1.06e-18	0.838676	0.991	0.682	1.77e-14	6	KCNQ1OT1	periocular mesenchyme
CREB53	2.48e-27	0.824318	0.897	0.436	4.16e-23	6	CREB5	periocular mesenchyme
MIR99AHG	5.53e-30	0.824094	0.761	0.293	9.26e-26	6	MIR99AHG	periocular mesenchyme
MXRA51	3.69e-35	0.820381	0.726	0.221	6.18e-31	6	MXRA5	periocular mesenchyme
SULT1E13	1.16e-15	0.816883	0.462	0.165	1.94e-11	6	SULT1E1	periocular mesenchyme
TRIO	3.16e-23	0.807229	0.701	0.31	5.3e-19	6	TRIO	periocular mesenchyme
COL1A13	1.34e-20	0.804344	0.983	0.527	2.25e-16	6	COL1A1	periocular mesenchyme
ARHGAP24	2.73e-29	0.802348	0.496	0.126	4.57e-25	6	ARHGAP24	periocular mesenchyme
NFIB2	2.78e-24	0.794019	0.889	0.429	4.65e-20	6	NFIB	periocular mesenchyme
FOS	2.83e-17	0.789484	0.983	0.86	4.73e-13	6	FOS	periocular mesenchyme
PEG3	1.56e-24	0.767342	0.752	0.359	2.62e-20	6	PEG3	periocular mesenchyme
ADGRL3	7.61e-21	0.766214	0.667	0.298	1.27e-16	6	ADGRL3	periocular mesenchyme
LIMA11	3.73e-26	0.7633	0.786	0.323	6.24e-22	6	LIMA1	periocular mesenchyme
ANGPT11	6.57e-11	0.755103	0.325	0.119	1.1e-06	6	ANGPT1	periocular mesenchyme
FBLN12	9.09e-19	0.749487	0.949	0.668	1.52e-14	6	FBLN1	periocular mesenchyme
CDC42EP53	1.89e-19	0.745316	0.897	0.443	3.16e-15	6	CDC42EP5	periocular mesenchyme
RAMP21	3.65e-21	0.741063	0.726	0.331	6.12e-17	6	RAMP2	periocular mesenchyme
NFKBIZ1	5.32e-22	0.737071	0.573	0.21	8.92e-18	6	NFKBIZ	periocular mesenchyme
PHLDA1	1.51e-30	0.732149	0.59	0.173	2.53e-26	6	PHLDA1	periocular mesenchyme
EDNRA1	1.06e-25	0.729482	0.684	0.246	1.78e-21	6	EDNRA	periocular mesenchyme
BOC1	3.93e-21	0.728849	0.624	0.255	6.58e-17	6	BOC	periocular mesenchyme
HLA-E	6.55e-26	0.72697	0.624	0.215	1.1e-21	6	HLA-E	periocular mesenchyme
COL6A23	1.49e-21	0.721987	0.932	0.477	2.5e-17	6	COL6A2	periocular mesenchyme
FSTL12	2.37e-18	0.719362	0.906	0.531	3.97e-14	6	FSTL1	periocular mesenchyme
FRMD4A	5.5e-20	0.715451	0.718	0.349	9.21e-16	6	FRMD4A	periocular mesenchyme
EBF12	9.12e-28	0.713877	0.786	0.276	1.53e-23	6	EBF1	periocular mesenchyme
SPRY11	8.65e-19	0.702369	0.581	0.226	1.45e-14	6	SPRY1	periocular mesenchyme
COL6A6	1.31e-44	0.702333	0.368	0.041	2.19e-40	6	COL6A6	periocular mesenchyme
NECAB11	7.8e-47	0.701249	0.479	0.07	1.31e-42	6	NECAB1	periocular mesenchyme
SOCS32	2.9e-15	0.699521	0.803	0.463	4.85e-11	6	SOCS3	periocular mesenchyme
MSC	2.55e-62	0.692565	0.368	0.025	4.27e-58	6	MSC	periocular mesenchyme
IRX22	1.08e-19	0.690828	0.752	0.336	1.81e-15	6	IRX2	periocular mesenchyme
TBX152	2.82e-30	0.685909	0.53	0.126	4.73e-26	6	TBX15	periocular mesenchyme
CALCRL	2.84e-34	0.684239	0.368	0.058	4.75e-30	6	CALCRL	periocular mesenchyme
NFIA1	1.04e-20	0.680299	0.744	0.324	1.74e-16	6	NFIA	periocular mesenchyme
MAGED22	1.57e-17	0.679863	0.966	0.832	2.63e-13	6	MAGED2	periocular mesenchyme
COL5A22	1.09e-23	0.679578	0.795	0.324	1.83e-19	6	COL5A2	periocular mesenchyme
TRIL	3.11e-26	0.678351	0.436	0.101	5.21e-22	6	TRIL	periocular mesenchyme
MT-ND52	1.35e-19	0.677889	0.991	0.848	2.27e-15	6	MT-ND5	periocular mesenchyme
EBF31	8.55e-31	0.667901	0.564	0.147	1.43e-26	6	EBF3	periocular mesenchyme
C1orf54	1.14e-27	0.665089	0.547	0.158	1.91e-23	6	C1orf54	periocular mesenchyme
CLSTN2	2.04e-42	0.661988	0.504	0.093	3.42e-38	6	CLSTN2	periocular mesenchyme
FCGRT2	3.55e-19	0.658943	0.718	0.338	5.94e-15	6	FCGRT	periocular mesenchyme
IER2	1.67e-12	0.653985	0.949	0.781	2.79e-08	6	IER2	periocular mesenchyme
GPC31	4.1e-18	0.65356	0.65	0.274	6.87e-14	6	GPC3	periocular mesenchyme
GATA31	3.25e-23	0.646655	0.462	0.123	5.44e-19	6	GATA3	periocular mesenchyme
LUM1	1.92e-10	0.644997	0.718	0.409	3.22e-06	6	LUM	periocular mesenchyme
AKR1C1	2.71e-28	0.641585	0.308	0.048	4.54e-24	6	AKR1C1	periocular mesenchyme
ACTG11	7.14e-27	0.639764	0.991	0.987	1.2e-22	6	ACTG1	periocular mesenchyme
MEG32	1.04e-14	0.639458	0.966	0.624	1.74e-10	6	MEG3	periocular mesenchyme
IL11RA2	2.9e-20	0.638903	0.829	0.377	4.86e-16	6	IL11RA	periocular mesenchyme
TES2	2.39e-21	0.638482	0.778	0.343	4.01e-17	6	TES	periocular mesenchyme
IRF11	1.88e-20	0.633009	0.598	0.218	3.16e-16	6	IRF1	periocular mesenchyme
LAPTM4A2	9.79e-19	0.630244	0.957	0.808	1.64e-14	6	LAPTM4A	periocular mesenchyme
PLBD11	1.61e-12	0.630109	0.487	0.228	2.69e-08	6	PLBD1	periocular mesenchyme
EGR11	3.22e-15	0.622491	0.923	0.61	5.39e-11	6	EGR1	periocular mesenchyme
EDN31	2.27e-22	0.618822	0.564	0.18	3.8e-18	6	EDN3	periocular mesenchyme
ADD3	9.57e-23	0.618541	0.812	0.388	1.6e-18	6	ADD3	periocular mesenchyme
CXCL122	8.27e-14	0.617996	0.564	0.251	1.39e-09	6	CXCL12	periocular mesenchyme
SVIL	2.74e-23	0.615886	0.701	0.289	4.59e-19	6	SVIL	periocular mesenchyme
COL12A11	6.25e-20	0.615745	0.581	0.203	1.05e-15	6	COL12A1	periocular mesenchyme
CNTN41	1.2e-13	0.608681	0.487	0.208	2.01e-09	6	CNTN4	periocular mesenchyme
IER31	3.47e-09	0.608449	0.504	0.255	5.81e-05	6	IER3	periocular mesenchyme
SSR2	2.51e-21	0.6082	0.991	0.853	4.21e-17	6	SSR2	periocular mesenchyme
TCF4	5.98e-15	0.607597	0.966	0.713	1e-10	6	TCF4	periocular mesenchyme
CALU1	6.43e-15	0.6058	0.88	0.653	1.08e-10	6	CALU	periocular mesenchyme
ISLR1	6.97e-27	0.605116	0.479	0.12	1.17e-22	6	ISLR	periocular mesenchyme
ZFP36	3.71e-28	0.603078	0.573	0.166	6.21e-24	6	ZFP36	periocular mesenchyme
XBP1	3.42e-14	0.602811	0.744	0.434	5.73e-10	6	XBP1	periocular mesenchyme
FIBIN2	6.17e-16	0.60222	0.556	0.215	1.03e-11	6	FIBIN	periocular mesenchyme
GLIPR21	2.49e-18	0.59975	0.581	0.235	4.17e-14	6	GLIPR2	periocular mesenchyme
FBN21	1.26e-10	0.5994	0.735	0.472	2.12e-06	6	FBN2	periocular mesenchyme
KLF2	5.95e-14	0.59698	0.41	0.152	9.97e-10	6	KLF2	periocular mesenchyme
SLC12A2	6.68e-14	0.594297	0.53	0.239	1.12e-09	6	SLC12A2	periocular mesenchyme
HSPA5	1.38e-11	0.586447	0.94	0.766	2.31e-07	6	HSPA5	periocular mesenchyme
SPATS2L1	4.26e-18	0.583293	0.795	0.398	7.13e-14	6	SPATS2L	periocular mesenchyme
EBF2	4.46e-42	0.57881	0.393	0.051	7.48e-38	6	EBF2	periocular mesenchyme
RGS5	3.61e-09	0.577131	0.231	0.079	6.06e-05	6	RGS5	periocular mesenchyme
UGDH	1.81e-17	0.563844	0.607	0.284	3.03e-13	6	UGDH	periocular mesenchyme
ROR1	5.4e-15	0.562627	0.521	0.228	9.04e-11	6	ROR1	periocular mesenchyme
CHSY1	1.16e-15	0.558356	0.487	0.197	1.94e-11	6	CHSY1	periocular mesenchyme
SUB1	2.66e-16	0.558	0.957	0.848	4.46e-12	6	SUB1	periocular mesenchyme
OLFM21	7.06e-14	0.557658	0.718	0.405	1.18e-09	6	OLFM2	periocular mesenchyme
HCN1	9.2e-51	0.556841	0.342	0.029	1.54e-46	6	HCN1	periocular mesenchyme
SHISA3	1.16e-69	0.55508	0.248	0.004	1.94e-65	6	SHISA3	periocular mesenchyme
LGALS13	1.91e-12	0.554892	0.966	0.597	3.2e-08	6	LGALS1	periocular mesenchyme
LTBP41	1.26e-16	0.552972	0.709	0.355	2.1e-12	6	LTBP4	periocular mesenchyme
PBX1	2.29e-07	0.549565	0.744	0.583	0.00383295	6	PBX1	periocular mesenchyme
FKBP101	3.89e-12	0.549012	0.829	0.505	6.51e-08	6	FKBP10	periocular mesenchyme
COL5A12	1.44e-15	0.548036	0.667	0.303	2.42e-11	6	COL5A1	periocular mesenchyme
CPED11	5.27e-16	0.543867	0.59	0.234	8.82e-12	6	CPED1	periocular mesenchyme
BCL7C	7.72e-16	0.541863	0.829	0.508	1.29e-11	6	BCL7C	periocular mesenchyme
COL9A32	5.2e-16	0.541822	0.556	0.217	8.72e-12	6	COL9A3	periocular mesenchyme
FZD22	8.08e-15	0.538833	0.812	0.495	1.35e-10	6	FZD2	periocular mesenchyme
ADGRL2	2.31e-11	0.537384	0.598	0.329	3.86e-07	6	ADGRL2	periocular mesenchyme
GXYLT2	6.58e-24	0.537241	0.564	0.173	1.1e-19	6	GXYLT2	periocular mesenchyme
RALYL	6.37e-13	0.534827	0.359	0.129	1.07e-08	6	RALYL	periocular mesenchyme
ARID5B2	5.58e-16	0.534435	0.829	0.448	9.35e-12	6	ARID5B	periocular mesenchyme
LRRC4C	2.93e-24	0.521328	0.376	0.085	4.91e-20	6	LRRC4C	periocular mesenchyme
CA10	5.52e-44	0.520328	0.291	0.023	9.26e-40	6	CA10	periocular mesenchyme
ALDH1A2	1.3e-21	0.518943	0.308	0.063	2.18e-17	6	ALDH1A2	periocular mesenchyme
COL6A12	1.24e-13	0.517635	0.812	0.534	2.07e-09	6	COL6A1	periocular mesenchyme
OSR11	2.56e-22	0.509044	0.359	0.077	4.28e-18	6	OSR1	periocular mesenchyme
ATP2B1	2.35e-09	0.507386	0.684	0.47	3.94e-05	6	ATP2B1	periocular mesenchyme
ITM2C3	8.71e-12	0.506999	0.957	0.68	1.46e-07	6	ITM2C	periocular mesenchyme
CTSC1	0.000976498	0.503179	0.504	0.391	1	6	CTSC	periocular mesenchyme
EVA1B1	3.69e-12	0.502323	0.795	0.481	6.18e-08	6	EVA1B	periocular mesenchyme
CYP1B11	1.26e-20	0.501365	0.744	0.318	2.12e-16	6	CYP1B1	periocular mesenchyme
LAMB12	6.02e-13	0.501111	0.632	0.316	1.01e-08	6	LAMB1	periocular mesenchyme
H3F3B	3.7e-17	0.500973	1	0.973	6.21e-13	6	H3F3B	periocular mesenchyme
IRX11	2.25e-15	0.50001	0.521	0.197	3.77e-11	6	IRX1	periocular mesenchyme
KRT17	2.5e-08	3.37954	0.121	0.024	0.000419647	7	KRT17	ocular surface epithelium
PTGDS	6.44e-05	2.98794	0.111	0.035	1	7	PTGDS	ocular surface epithelium
CDKN1A	5.84e-15	2.63753	0.172	0.026	9.79e-11	7	CDKN1A	ocular surface epithelium
RNASE1	1.67e-11	2.40367	0.141	0.024	2.8e-07	7	RNASE1	ocular surface epithelium
ZFP361	0.000380457	2.09613	0.293	0.188	1	7	ZFP36	ocular surface epithelium
NFKBIA	0.00153098	1.91883	0.444	0.416	1	7	NFKBIA	ocular surface epithelium
FTL	0.000109747	1.87694	0.919	0.982	1	7	FTL	ocular surface epithelium
C11orf96	2.47e-05	1.8439	0.202	0.086	0.413149	7	C11orf96	ocular surface epithelium
ANXA1	3.43e-09	1.78169	0.192	0.053	5.75e-05	7	ANXA1	ocular surface epithelium
SAT1	0.00795368	1.77018	0.414	0.396	1	7	SAT1	ocular surface epithelium
SPARCL1	1.45e-12	1.74012	0.121	0.016	2.44e-08	7	SPARCL1	ocular surface epithelium
HLA-B	9.23e-05	1.65429	0.152	0.06	1	7	HLA-B	ocular surface epithelium
S100A101	0.000396734	1.61524	0.374	0.281	1	7	S100A10	ocular surface epithelium
GADD45B1	0.00437559	1.59919	0.394	0.33	1	7	GADD45B	ocular surface epithelium
TXNIP	0.00731371	1.59263	0.253	0.186	1	7	TXNIP	ocular surface epithelium
EMP1	3.39e-18	1.57173	0.121	0.009	5.68e-14	7	EMP1	ocular surface epithelium
ADIRF	5.58e-35	1.5126	0.141	0.004	9.36e-31	7	ADIRF	ocular surface epithelium
LGALS3	0.000723165	1.47748	0.192	0.102	1	7	LGALS3	ocular surface epithelium
SLC2A3	0.00677888	1.45357	0.232	0.161	1	7	SLC2A3	ocular surface epithelium
RPS27L	0.00824773	1.40386	0.293	0.539	1	7	RPS27L	ocular surface epithelium
KRT5	6.76e-15	1.3348	0.101	0.008	1.13e-10	7	KRT5	ocular surface epithelium
CXCL2	3.59e-15	1.28663	0.111	0.01	6.02e-11	7	CXCL2	ocular surface epithelium
A2M	6.52e-12	1.20064	0.101	0.011	1.09e-07	7	A2M	ocular surface epithelium
MT2A	0.000727354	1.17902	0.172	0.08	1	7	MT2A	ocular surface epithelium
WNT6	7.19e-21	1.15024	0.172	0.018	1.2e-16	7	WNT6	ocular surface epithelium
BHLHE401	0.00309975	1.14031	0.162	0.083	1	7	BHLHE40	ocular surface epithelium
NUPR1	1.5e-14	1.1304	0.111	0.011	2.51e-10	7	NUPR1	ocular surface epithelium
PERP1	4.7e-06	1.10195	0.182	0.067	0.078819	7	PERP	ocular surface epithelium
SQSTM11	0.00346861	1.08087	0.242	0.475	1	7	SQSTM1	ocular surface epithelium
CD74	0.000375618	1.01822	0.101	0.033	1	7	CD74	ocular surface epithelium
DEPP1	1.43e-10	0.954984	0.101	0.013	2.39e-06	7	DEPP1	ocular surface epithelium
FTH11	5.15e-05	0.954383	0.97	0.988	0.863286	7	FTH1	ocular surface epithelium
EPAS1	1.41e-13	0.90719	0.101	0.009	2.37e-09	7	EPAS1	ocular surface epithelium
IFI16	5.04e-12	0.897801	0.162	0.03	8.44e-08	7	IFI16	ocular surface epithelium
TNFSF10	4.92e-37	0.852474	0.111	0.001	8.24e-33	7	TNFSF10	ocular surface epithelium
TMSB4X2	0.00455419	0.834364	0.879	0.952	1	7	TMSB4X	ocular surface epithelium
CD9	0.000282736	0.819251	0.152	0.063	1	7	CD9	ocular surface epithelium
UBC	4.1e-06	0.811193	0.859	0.949	0.0687307	7	UBC	ocular surface epithelium
CAV1	1.05e-05	0.805686	0.121	0.035	0.175605	7	CAV1	ocular surface epithelium
HSPA1A1	0.00659605	0.787722	0.414	0.712	1	7	HSPA1A	ocular surface epithelium
CTSD1	0.00181351	0.787716	0.232	0.457	1	7	CTSD	ocular surface epithelium
PDLIM11	0.000449924	0.775369	0.162	0.071	1	7	PDLIM1	ocular surface epithelium
AGR21	3.95e-12	0.744477	0.131	0.019	6.62e-08	7	AGR2	ocular surface epithelium
EIF1	2.65e-05	0.696204	0.949	0.981	0.44328	7	EIF1	ocular surface epithelium
VAMP8	9.81e-12	0.695332	0.121	0.017	1.64e-07	7	VAMP8	ocular surface epithelium
IL6ST	0.00674738	0.636807	0.152	0.32	1	7	IL6ST	ocular surface epithelium
GLUL	1.6e-05	0.606686	0.263	0.618	0.268455	7	GLUL	ocular surface epithelium
EFNA1	5.99e-13	0.604969	0.141	0.021	1e-08	7	EFNA1	ocular surface epithelium
AKAP121	2.74e-05	0.593863	0.263	0.6	0.459429	7	AKAP12	ocular surface epithelium
ADAMTS11	0.00447814	0.587617	0.141	0.295	1	7	ADAMTS1	ocular surface epithelium
ANKRD36C	0.000232714	0.58704	0.101	0.299	1	7	ANKRD36C	ocular surface epithelium
RHOB	0.00574512	0.580526	0.242	0.476	1	7	RHOB	ocular surface epithelium
CLK1	0.000268086	0.560565	0.283	0.591	1	7	CLK1	ocular surface epithelium
HERPUD1	0.00328164	0.552812	0.202	0.407	1	7	HERPUD1	ocular surface epithelium
EGLN3	0.00205033	0.542351	0.121	0.051	1	7	EGLN3	ocular surface epithelium
MAT2A	0.00141783	0.538519	0.182	0.389	1	7	MAT2A	ocular surface epithelium
FNIP1	0.00835216	0.531573	0.202	0.401	1	7	FNIP1	ocular surface epithelium
DDX3X	0.0039485	0.527363	0.343	0.66	1	7	DDX3X	ocular surface epithelium
CTSZ	0.0042413	0.519877	0.131	0.296	1	7	CTSZ	ocular surface epithelium
IGFBP42	3.06e-05	0.517489	0.162	0.428	0.512658	7	IGFBP4	ocular surface epithelium
SETBP1	0.00576018	0.517331	0.141	0.287	1	7	SETBP1	ocular surface epithelium
CTSL	0.000709996	0.512224	0.172	0.39	1	7	CTSL	ocular surface epithelium
TIMP2	2.48e-05	0.5114	0.172	0.46	0.415609	7	TIMP2	ocular surface epithelium
TKT	0.00625329	0.50633	0.394	0.762	1	7	TKT	ocular surface epithelium
CPLANE1	0.00948363	0.50426	0.081	0.205	1	7	CPLANE1	ocular surface epithelium
SOD1	0.00450522	0.501789	0.495	0.862	1	7	SOD1	ocular surface epithelium
STMN2	3.58e-101	3.55215	0.976	0.136	6e-97	8	STMN2	T1/T2
ATOH7	1.21e-63	3.19311	0.647	0.082	2.03e-59	8	ATOH7	T1/T2
ONECUT2	1.69e-98	3.07981	0.741	0.067	2.83e-94	8	ONECUT2	T1/T2
RGS16	9.13e-68	2.81276	0.671	0.09	1.53e-63	8	RGS16	T1/T2
GAL	1.18e-24	2.70662	0.388	0.077	1.98e-20	8	GAL	T1/T2
DLL3	1.36e-42	2.32194	0.553	0.095	2.28e-38	8	DLL3	T1/T2
PTF1A	3.58e-97	2.30564	0.329	0.004	5.99e-93	8	PTF1A	T1/T2
INA	1.96e-81	2.19454	0.659	0.06	3.29e-77	8	INA	T1/T2
TAGLN3	2.97e-61	2.16635	0.847	0.174	4.98e-57	8	TAGLN3	T1/T2
HEY1	9e-33	2.14733	0.671	0.202	1.51e-28	8	HEY1	T1/T2
MAP1B	5.11e-43	2.12354	1	0.659	8.56e-39	8	MAP1B	T1/T2
TUBB2B	1.03e-40	1.9995	0.988	0.785	1.73e-36	8	TUBB2B	T1/T2
PCBP4	6.12e-32	1.99675	0.788	0.334	1.02e-27	8	PCBP4	T1/T2
MIAT	1.76e-38	1.97623	0.659	0.156	2.95e-34	8	MIAT	T1/T2
PAX61	5.24e-34	1.93793	0.871	0.405	8.78e-30	8	PAX6	T1/T2
MLLT11	7.19e-33	1.83192	0.882	0.5	1.2e-28	8	MLLT11	T1/T2
CXCR4	2.82e-40	1.78573	0.635	0.129	4.72e-36	8	CXCR4	T1/T2
GADD45A	5.68e-25	1.73484	0.718	0.315	9.51e-21	8	GADD45A	T1/T2
ELAVL3	7.31e-81	1.73449	0.624	0.052	1.22e-76	8	ELAVL3	T1/T2
SYT4	2.03e-58	1.72728	0.506	0.049	3.39e-54	8	SYT4	T1/T2
SNCG	1.05e-48	1.72726	0.647	0.106	1.76e-44	8	SNCG	T1/T2
SOX111	1.73e-29	1.71306	0.894	0.635	2.9e-25	8	SOX11	T1/T2
CRMP1	1.2e-53	1.69757	0.765	0.149	2.01e-49	8	CRMP1	T1/T2
DST	1.48e-19	1.68641	0.671	0.314	2.49e-15	8	DST	T1/T2
RORB1	8.91e-38	1.67018	0.788	0.233	1.49e-33	8	RORB	T1/T2
CXXC51	7.77e-27	1.65719	0.8	0.425	1.3e-22	8	CXXC5	T1/T2
SOX4	4.74e-21	1.64331	0.941	0.851	7.94e-17	8	SOX4	T1/T2
SCG3	9.1e-80	1.64286	0.694	0.071	1.52e-75	8	SCG3	T1/T2
BNIP3	7.61e-17	1.64164	0.718	0.422	1.27e-12	8	BNIP3	T1/T2
ONECUT1	4.13e-48	1.61686	0.388	0.035	6.92e-44	8	ONECUT1	T1/T2
HES6	1.94e-24	1.60336	0.612	0.197	3.24e-20	8	HES6	T1/T2
STMN4	4.03e-31	1.58799	0.447	0.079	6.75e-27	8	STMN4	T1/T2
GAP43	1.28e-14	1.57604	0.671	0.345	2.14e-10	8	GAP43	T1/T2
RTN1	1.44e-30	1.54305	0.412	0.066	2.41e-26	8	RTN1	T1/T2
HSPA1A2	8.9e-19	1.50094	0.871	0.686	1.49e-14	8	HSPA1A	T1/T2
TUBA1A	5.81e-32	1.49366	1	0.965	9.73e-28	8	TUBA1A	T1/T2
DLX2	1.72e-81	1.49357	0.518	0.033	2.88e-77	8	DLX2	T1/T2
SYT12	2.95e-28	1.48341	0.753	0.287	4.95e-24	8	SYT1	T1/T2
SH3BGRL3	2.53e-09	1.46829	0.718	0.62	4.25e-05	8	SH3BGRL3	T1/T2
LRRN3	7.12e-33	1.41872	0.494	0.095	1.19e-28	8	LRRN3	T1/T2
POU4F2	9.65e-30	1.39182	0.353	0.049	1.62e-25	8	POU4F2	T1/T2
SRRM4	3.39e-69	1.38003	0.553	0.05	5.67e-65	8	SRRM4	T1/T2
BCL7A	2.54e-19	1.37942	0.612	0.266	4.26e-15	8	BCL7A	T1/T2
ELAVL2	1.01e-51	1.37827	0.635	0.096	1.68e-47	8	ELAVL2	T1/T2
CHD71	2.54e-21	1.36706	0.718	0.312	4.26e-17	8	CHD7	T1/T2
KIF5C1	3.49e-24	1.36388	0.671	0.239	5.85e-20	8	KIF5C	T1/T2
CAMK2N11	1.08e-20	1.36186	0.765	0.443	1.81e-16	8	CAMK2N1	T1/T2
INSM1	6.23e-38	1.35532	0.424	0.058	1.04e-33	8	INSM1	T1/T2
RBP11	2.09e-15	1.33293	0.906	0.828	3.5e-11	8	RBP1	T1/T2
AC010247.2	3.75e-44	1.32741	0.4	0.04	6.28e-40	8	AC010247.2	T1/T2
CADPS	3.04e-46	1.32709	0.435	0.048	5.1e-42	8	CADPS	T1/T2
SIX32	3.77e-25	1.31648	0.835	0.332	6.32e-21	8	SIX3	T1/T2
C1QL1	2.79e-29	1.29303	0.353	0.052	4.67e-25	8	C1QL1	T1/T2
BEX1	1.86e-26	1.28098	0.765	0.298	3.11e-22	8	BEX1	T1/T2
NEUROD1	4.15e-42	1.27188	0.365	0.034	6.95e-38	8	NEUROD1	T1/T2
TUBB2A	1.28e-12	1.26769	0.718	0.442	2.14e-08	8	TUBB2A	T1/T2
PRDM13	7.4e-94	1.26516	0.282	0.001	1.24e-89	8	PRDM13	T1/T2
CADM1	6.36e-16	1.24295	0.729	0.409	1.07e-11	8	CADM1	T1/T2
CD24	8.4e-20	1.24149	0.871	0.747	1.41e-15	8	CD24	T1/T2
BHMT	7.5e-71	1.23566	0.424	0.023	1.26e-66	8	BHMT	T1/T2
DCX	1.16e-45	1.23444	0.565	0.083	1.94e-41	8	DCX	T1/T2
ELAVL4	9.95e-43	1.21336	0.518	0.069	1.67e-38	8	ELAVL4	T1/T2
DLX1	1.25e-78	1.20341	0.459	0.025	2.09e-74	8	DLX1	T1/T2
HSP90AA11	1.09e-22	1.20315	0.965	0.965	1.83e-18	8	HSP90AA1	T1/T2
ZNF385A	2.88e-30	1.20273	0.647	0.199	4.83e-26	8	ZNF385A	T1/T2
CKB1	6.04e-24	1.1953	0.976	0.516	1.01e-19	8	CKB	T1/T2
NHLH2	1.65e-21	1.1923	0.271	0.04	2.77e-17	8	NHLH2	T1/T2
MAP2	1.3e-27	1.17474	0.624	0.177	2.18e-23	8	MAP2	T1/T2
CELF4	9.63e-25	1.16376	0.341	0.058	1.61e-20	8	CELF4	T1/T2
APLP1	3.05e-17	1.16332	0.565	0.223	5.11e-13	8	APLP1	T1/T2
DAAM11	1.79e-11	1.16074	0.682	0.436	3.01e-07	8	DAAM1	T1/T2
PRPH	2.54e-07	1.15317	0.2	0.059	0.00425648	8	PRPH	T1/T2
JPT11	5.63e-18	1.1504	0.882	0.748	9.43e-14	8	JPT1	T1/T2
RCOR2	1.56e-24	1.14826	0.624	0.209	2.61e-20	8	RCOR2	T1/T2
SLC18A2	4.46e-32	1.13569	0.376	0.052	7.48e-28	8	SLC18A2	T1/T2
ESRRG	2.89e-44	1.13555	0.482	0.065	4.85e-40	8	ESRRG	T1/T2
GADD45G	3.97e-23	1.12903	0.412	0.09	6.65e-19	8	GADD45G	T1/T2
NECTIN3	6.97e-07	1.12201	0.482	0.316	0.0116837	8	NECTIN3	T1/T2
MAP6	7.94e-24	1.11209	0.541	0.154	1.33e-19	8	MAP6	T1/T2
BARHL2	7.38e-48	1.1117	0.271	0.014	1.24e-43	8	BARHL2	T1/T2
HES51	1.51e-08	1.10746	0.376	0.156	0.000252273	8	HES5	T1/T2
AMER2	9.96e-18	1.08242	0.388	0.106	1.67e-13	8	AMER2	T1/T2
NEFL	5.28e-17	1.07252	0.294	0.057	8.85e-13	8	NEFL	T1/T2
PCSK1N	1.89e-13	1.07049	0.588	0.257	3.17e-09	8	PCSK1N	T1/T2
CELF3	3.97e-57	1.06165	0.494	0.048	6.65e-53	8	CELF3	T1/T2
FAM57B	1.11e-60	1.06139	0.447	0.034	1.87e-56	8	FAM57B	T1/T2
RTN4	2.8e-15	1.06032	0.882	0.814	4.7e-11	8	RTN4	T1/T2
BASP11	5.42e-20	1.05223	0.965	0.829	9.08e-16	8	BASP1	T1/T2
KIF1A	1.15e-33	1.04633	0.565	0.128	1.92e-29	8	KIF1A	T1/T2
SSTR2	7.9e-24	1.04507	0.341	0.059	1.32e-19	8	SSTR2	T1/T2
PPP1R17	2.46e-56	1.04352	0.412	0.032	4.12e-52	8	PPP1R17	T1/T2
NSG2	2.21e-45	1.04219	0.306	0.021	3.71e-41	8	NSG2	T1/T2
GNG3	1.17e-16	1.04083	0.365	0.09	1.96e-12	8	GNG3	T1/T2
GPM6A2	1.33e-14	1.02637	0.624	0.29	2.23e-10	8	GPM6A	T1/T2
MIR124-2HG	1.59e-35	1.01106	0.435	0.067	2.67e-31	8	MIR124-2HG	T1/T2
ENO2	4.18e-15	1.01024	0.412	0.134	7e-11	8	ENO2	T1/T2
TACC2	3.93e-21	1.00897	0.459	0.122	6.59e-17	8	TACC2	T1/T2
GRIA2	1.06e-24	1.00885	0.318	0.05	1.78e-20	8	GRIA2	T1/T2
RASD1	1.28e-40	1.00237	0.4	0.045	2.15e-36	8	RASD1	T1/T2
CNTN2	5.98e-15	0.983141	0.306	0.068	1e-10	8	CNTN2	T1/T2
MINDY2	5.62e-09	0.980959	0.588	0.362	9.42e-05	8	MINDY2	T1/T2
LINC00599	9.29e-44	0.980656	0.294	0.02	1.56e-39	8	LINC00599	T1/T2
UCHL1	1.64e-08	0.980444	0.671	0.484	0.000274187	8	UCHL1	T1/T2
ADD2	1.21e-24	0.978871	0.424	0.091	2.02e-20	8	ADD2	T1/T2
PLEKHA11	5.52e-06	0.964121	0.518	0.36	0.0924684	8	PLEKHA1	T1/T2
KLF7	1.07e-09	0.963481	0.353	0.136	1.79e-05	8	KLF7	T1/T2
MIDN	8.65e-09	0.959762	0.659	0.472	0.000144834	8	MIDN	T1/T2
GATM	2.98e-13	0.958115	0.235	0.052	4.99e-09	8	GATM	T1/T2
ZBTB20	2.83e-11	0.957039	0.6	0.33	4.74e-07	8	ZBTB20	T1/T2
TMEM176A	2.47e-20	0.949231	0.282	0.047	4.14e-16	8	TMEM176A	T1/T2
TFAP2B	1.13e-14	0.946891	0.224	0.04	1.89e-10	8	TFAP2B	T1/T2
CHRNA3	4.78e-23	0.9465	0.4	0.082	8.01e-19	8	CHRNA3	T1/T2
CADM3	3.92e-27	0.945952	0.471	0.103	6.56e-23	8	CADM3	T1/T2
ARL4C1	7.51e-08	0.938431	0.565	0.329	0.00125768	8	ARL4C	T1/T2
NEUROD4	1.95e-68	0.933737	0.247	0.004	3.27e-64	8	NEUROD4	T1/T2
CACNA1A	3.41e-18	0.931096	0.435	0.127	5.72e-14	8	CACNA1A	T1/T2
ATP1A3	2.06e-31	0.929346	0.482	0.091	3.45e-27	8	ATP1A3	T1/T2
NKAIN41	9.65e-15	0.927379	0.635	0.294	1.62e-10	8	NKAIN4	T1/T2
AL139246.51	4.05e-19	0.926426	0.329	0.067	6.79e-15	8	AL139246.5	T1/T2
SLC38A1	9.62e-11	0.918083	0.635	0.371	1.61e-06	8	SLC38A1	T1/T2
TERF2IP	1.54e-10	0.909655	0.812	0.719	2.58e-06	8	TERF2IP	T1/T2
CCNI	1.41e-17	0.908066	0.894	0.892	2.36e-13	8	CCNI	T1/T2
SLN	3.81e-19	0.903954	0.165	0.016	6.39e-15	8	SLN	T1/T2
THBS3	4.67e-28	0.9013	0.424	0.08	7.82e-24	8	THBS3	T1/T2
DYNC1H1	9.45e-09	0.899185	0.741	0.619	0.000158344	8	DYNC1H1	T1/T2
CMIP	1.13e-08	0.897597	0.388	0.18	0.000189484	8	CMIP	T1/T2
CLDN5	6.82e-19	0.896779	0.294	0.053	1.14e-14	8	CLDN5	T1/T2
LINGO1	1.12e-25	0.888719	0.447	0.096	1.87e-21	8	LINGO1	T1/T2
PHYHIPL1	3.62e-17	0.888413	0.612	0.24	6.06e-13	8	PHYHIPL	T1/T2
KALRN	1.57e-21	0.888398	0.506	0.144	2.63e-17	8	KALRN	T1/T2
SYP	2.13e-32	0.887506	0.341	0.043	3.57e-28	8	SYP	T1/T2
ELP4	3.9e-13	0.883213	0.553	0.259	6.53e-09	8	ELP4	T1/T2
GPI	0.00016264	0.88254	0.447	0.315	1	8	GPI	T1/T2
SERPINI1	4.13e-18	0.880692	0.341	0.077	6.93e-14	8	SERPINI1	T1/T2
PTPRF	5.31e-12	0.87684	0.529	0.247	8.9e-08	8	PTPRF	T1/T2
RAX1	9.99e-09	0.873959	0.541	0.268	0.000167285	8	RAX	T1/T2
CPLX2	4.16e-41	0.873388	0.329	0.029	6.98e-37	8	CPLX2	T1/T2
DCC	5.01e-27	0.871547	0.365	0.057	8.39e-23	8	DCC	T1/T2
PLXNA2	5.09e-20	0.865796	0.376	0.085	8.52e-16	8	PLXNA2	T1/T2
TFAP2A	6.68e-09	0.864227	0.247	0.078	0.00011196	8	TFAP2A	T1/T2
CHGB	8.58e-35	0.864122	0.341	0.039	1.44e-30	8	CHGB	T1/T2
GDAP1L1	1.78e-26	0.858642	0.306	0.042	2.98e-22	8	GDAP1L1	T1/T2
SYT7	6.04e-22	0.857936	0.424	0.098	1.01e-17	8	SYT7	T1/T2
TRH1	1.15e-19	0.855179	0.412	0.102	1.93e-15	8	TRH	T1/T2
ATP6V1G2	3.15e-16	0.850759	0.306	0.07	5.27e-12	8	ATP6V1G2	T1/T2
NES1	0.000326425	0.849829	0.447	0.335	1	8	NES	T1/T2
BAZ1A	1.04e-09	0.848852	0.612	0.386	1.74e-05	8	BAZ1A	T1/T2
GPC2	4.25e-13	0.847067	0.541	0.251	7.12e-09	8	GPC2	T1/T2
C14orf132	3.3e-07	0.844538	0.424	0.215	0.00553369	8	C14orf132	T1/T2
DPYSL2	2.4e-10	0.841207	0.718	0.449	4.01e-06	8	DPYSL2	T1/T2
PPP1R14B	9.86e-13	0.836401	0.835	0.709	1.65e-08	8	PPP1R14B	T1/T2
PGK1	4.91e-05	0.834865	0.706	0.691	0.82205	8	PGK1	T1/T2
NNAT	8.55e-06	0.834	0.659	0.512	0.143201	8	NNAT	T1/T2
TSPAN7	5.64e-12	0.833981	0.341	0.106	9.45e-08	8	TSPAN7	T1/T2
NSG1	0.00196281	0.831914	0.341	0.218	1	8	NSG1	T1/T2
TMEM132A	1.91e-08	0.831017	0.565	0.371	0.000319752	8	TMEM132A	T1/T2
ZEB2	7.69e-07	0.826477	0.635	0.472	0.0128832	8	ZEB2	T1/T2
TBPL1	6.47e-13	0.824196	0.612	0.326	1.08e-08	8	TBPL1	T1/T2
TOX3	1.16e-12	0.819072	0.435	0.164	1.95e-08	8	TOX3	T1/T2
EEF1A2	5.25e-09	0.817621	0.129	0.023	8.8e-05	8	EEF1A2	T1/T2
FNDC5	2.11e-10	0.811694	0.506	0.238	3.54e-06	8	FNDC5	T1/T2
TPPP31	1.38e-08	0.807492	0.388	0.164	0.000231168	8	TPPP3	T1/T2
LDHA1	1.54e-07	0.806336	0.847	0.789	0.00258323	8	LDHA	T1/T2
FNBP1L	5.74e-06	0.806333	0.635	0.494	0.0962086	8	FNBP1L	T1/T2
C11orf961	7.94e-07	0.805904	0.235	0.085	0.0133089	8	C11orf96	T1/T2
KLHL35	1.12e-06	0.802382	0.212	0.07	0.018781	8	KLHL35	T1/T2
SCN3A	1.25e-30	0.801057	0.282	0.03	2.09e-26	8	SCN3A	T1/T2
CCDC112	7.08e-10	0.800412	0.518	0.262	1.19e-05	8	CCDC112	T1/T2
MAPK101	2.06e-11	0.799463	0.541	0.258	3.45e-07	8	MAPK10	T1/T2
NEFM	5.93e-29	0.798717	0.435	0.073	9.94e-25	8	NEFM	T1/T2
NCAM1	7.89e-05	0.795565	0.471	0.342	1	8	NCAM1	T1/T2
CLU1	0.000338089	0.793537	0.612	0.503	1	8	CLU	T1/T2
ATCAY	1.42e-28	0.792456	0.282	0.032	2.37e-24	8	ATCAY	T1/T2
SYT11	8.87e-11	0.783509	0.471	0.209	1.49e-06	8	SYT11	T1/T2
NRIP11	0.00214592	0.779988	0.471	0.375	1	8	NRIP1	T1/T2
CHD4	1.84e-07	0.776755	0.682	0.549	0.00308489	8	CHD4	T1/T2
TMEM176B	7.26e-16	0.77516	0.282	0.06	1.22e-11	8	TMEM176B	T1/T2
STMN11	2.9e-18	0.773529	0.976	0.954	4.85e-14	8	STMN1	T1/T2
C1orf43	5.88e-05	0.773396	0.624	0.549	0.985886	8	C1orf43	T1/T2
TMSB10	1.62e-08	0.773002	0.976	0.94	0.000271119	8	TMSB10	T1/T2
TRIM9	4.98e-41	0.769869	0.259	0.016	8.34e-37	8	TRIM9	T1/T2
DDIT4	3.05e-06	0.767852	0.659	0.537	0.0511687	8	DDIT4	T1/T2
KIF5A	2.43e-20	0.766567	0.282	0.047	4.07e-16	8	KIF5A	T1/T2
PBRM1	4.66e-09	0.766085	0.635	0.456	7.8e-05	8	PBRM1	T1/T2
OLFM1	6.78e-18	0.765024	0.294	0.055	1.14e-13	8	OLFM1	T1/T2
ATP6V0B	1.03e-06	0.762975	0.671	0.568	0.0172262	8	ATP6V0B	T1/T2
DPYSL3	0.000419605	0.760095	0.471	0.317	1	8	DPYSL3	T1/T2
KLHDC8A	3e-20	0.758264	0.235	0.032	5.02e-16	8	KLHDC8A	T1/T2
DPYSL4	1.58e-13	0.757436	0.529	0.22	2.65e-09	8	DPYSL4	T1/T2
SVBP	4.66e-05	0.756917	0.635	0.599	0.78073	8	SVBP	T1/T2
TMEM97	0.00577051	0.755927	0.447	0.358	1	8	TMEM97	T1/T2
GABRB3	2.46e-32	0.754866	0.412	0.064	4.11e-28	8	GABRB3	T1/T2
MGARP1	1.45e-10	0.750257	0.341	0.117	2.44e-06	8	MGARP	T1/T2
TCAF1	0.000872764	0.749495	0.553	0.444	1	8	TCAF1	T1/T2
ONECUT3	4.87e-46	0.746473	0.247	0.011	8.17e-42	8	ONECUT3	T1/T2
HIF1A	0.000635677	0.744042	0.565	0.468	1	8	HIF1A	T1/T2
ISL1	1.29e-13	0.74326	0.235	0.045	2.16e-09	8	ISL1	T1/T2
CRABP11	1.86e-13	0.741032	0.976	0.706	3.12e-09	8	CRABP1	T1/T2
FAM110A	6.08e-18	0.739292	0.329	0.072	1.02e-13	8	FAM110A	T1/T2
SBK1	5.42e-10	0.733135	0.435	0.194	9.08e-06	8	SBK1	T1/T2
PTBP2	1.36e-08	0.732937	0.588	0.383	0.000227554	8	PTBP2	T1/T2
DTD1	1.11e-06	0.731775	0.588	0.433	0.0185538	8	DTD1	T1/T2
LCA51	0.000173542	0.731531	0.4	0.262	1	8	LCA5	T1/T2
ETFB	2.71e-05	0.73138	0.682	0.62	0.453242	8	ETFB	T1/T2
KDM1A	0.00548014	0.722776	0.565	0.518	1	8	KDM1A	T1/T2
PKM	5.86e-06	0.721185	0.8	0.725	0.0980942	8	PKM	T1/T2
BZW2	4.12e-05	0.720474	0.659	0.57	0.690227	8	BZW2	T1/T2
MAP4K4	1.1e-05	0.720406	0.671	0.555	0.184201	8	MAP4K4	T1/T2
CSRNP3	6.51e-10	0.719612	0.494	0.243	1.09e-05	8	CSRNP3	T1/T2
MIB1	4.16e-06	0.717491	0.494	0.332	0.0696457	8	MIB1	T1/T2
STXBP1	1.69e-08	0.717167	0.4	0.189	0.000282411	8	STXBP1	T1/T2
HSPA1B1	4.96e-08	0.7135	0.6	0.376	0.000831282	8	HSPA1B	T1/T2
PFKFB3	2.12e-10	0.712192	0.376	0.141	3.54e-06	8	PFKFB3	T1/T2
KLF13	8.08e-05	0.711086	0.435	0.288	1	8	KLF13	T1/T2
TTLL7	1.32e-06	0.710856	0.424	0.225	0.0221374	8	TTLL7	T1/T2
GABBR2	7.41e-17	0.70959	0.212	0.032	1.24e-12	8	GABBR2	T1/T2
RNF165	1.24e-15	0.709157	0.459	0.161	2.08e-11	8	RNF165	T1/T2
DNAJC12	1.14e-12	0.709004	0.329	0.098	1.9e-08	8	DNAJC12	T1/T2
TRIB1	1.07e-06	0.707895	0.306	0.139	0.0178979	8	TRIB1	T1/T2
XKR4	6.51e-25	0.705374	0.294	0.042	1.09e-20	8	XKR4	T1/T2
RASSF41	3.41e-14	0.705098	0.459	0.162	5.71e-10	8	RASSF4	T1/T2
PROX1	1.83e-24	0.704903	0.294	0.041	3.07e-20	8	PROX1	T1/T2
BTBD8	5.54e-13	0.70451	0.294	0.08	9.27e-09	8	BTBD8	T1/T2
RERE	2.27e-05	0.700595	0.565	0.405	0.380854	8	RERE	T1/T2
NHLH1	6.2e-31	0.699289	0.306	0.034	1.04e-26	8	NHLH1	T1/T2
SCG51	0.00365228	0.695868	0.4	0.289	1	8	SCG5	T1/T2
AL391650.1	3.17e-10	0.692443	0.412	0.164	5.31e-06	8	AL391650.1	T1/T2
DUSP26	2.59e-11	0.690227	0.306	0.097	4.34e-07	8	DUSP26	T1/T2
MSI11	5.76e-08	0.688657	0.518	0.29	0.000964253	8	MSI1	T1/T2
ZBTB18	1.04e-24	0.686466	0.376	0.07	1.74e-20	8	ZBTB18	T1/T2
LCOR	3.05e-07	0.685635	0.518	0.294	0.00510571	8	LCOR	T1/T2
INSM2	6.44e-43	0.683394	0.271	0.016	1.08e-38	8	INSM2	T1/T2
CAMK4	1.64e-06	0.682245	0.247	0.099	0.0274852	8	CAMK4	T1/T2
FSTL5	2.33e-35	0.681644	0.294	0.026	3.91e-31	8	FSTL5	T1/T2
ADGRG1	3.86e-19	0.681566	0.341	0.073	6.47e-15	8	ADGRG1	T1/T2
LRRC49	1.75e-12	0.67895	0.471	0.195	2.93e-08	8	LRRC49	T1/T2
BTG2	7.98e-05	0.674832	0.553	0.434	1	8	BTG2	T1/T2
AP1S2	0.00905241	0.673411	0.494	0.395	1	8	AP1S2	T1/T2
VAX2	1.02e-11	0.673232	0.329	0.105	1.7e-07	8	VAX2	T1/T2
HDAC2	8.8e-06	0.668712	0.753	0.675	0.147396	8	HDAC2	T1/T2
MSI21	6.77e-05	0.667371	0.576	0.469	1	8	MSI2	T1/T2
PKIA	2.3e-08	0.667205	0.506	0.276	0.000385295	8	PKIA	T1/T2
SLC16A3	2.07e-08	0.666923	0.271	0.095	0.000346846	8	SLC16A3	T1/T2
PPP1R1A	2.82e-12	0.665197	0.294	0.077	4.72e-08	8	PPP1R1A	T1/T2
E2F1	7.26e-07	0.663233	0.271	0.111	0.012165	8	E2F1	T1/T2
ACVR2B1	4.5e-10	0.659463	0.553	0.278	7.54e-06	8	ACVR2B	T1/T2
YWHAH1	0.00283728	0.658597	0.694	0.622	1	8	YWHAH	T1/T2
MYEF2	2.99e-07	0.658223	0.494	0.299	0.00501657	8	MYEF2	T1/T2
CEP170	1.65e-06	0.656629	0.682	0.524	0.0275815	8	CEP170	T1/T2
KMT2E	9.86e-06	0.653158	0.729	0.702	0.165237	8	KMT2E	T1/T2
HIPK2	0.00418537	0.651964	0.424	0.327	1	8	HIPK2	T1/T2
SINHCAF	5.32e-06	0.651226	0.718	0.627	0.0890467	8	SINHCAF	T1/T2
DDR1	3.11e-06	0.649534	0.376	0.203	0.052106	8	DDR1	T1/T2
L1CAM	1.78e-14	0.648854	0.2	0.033	2.98e-10	8	L1CAM	T1/T2
PARP1	0.000196613	0.648163	0.694	0.62	1	8	PARP1	T1/T2
ST18	3.71e-54	0.64778	0.294	0.014	6.21e-50	8	ST18	T1/T2
NDST3	7.2e-12	0.6459	0.329	0.102	1.21e-07	8	NDST3	T1/T2
FGD4	5.59e-09	0.645898	0.412	0.188	9.37e-05	8	FGD4	T1/T2
MEIS11	8.88e-09	0.644036	0.447	0.204	0.00014873	8	MEIS1	T1/T2
TMSB4X3	1.25e-07	0.641097	0.988	0.945	0.00208758	8	TMSB4X	T1/T2
NOVA2	2.78e-19	0.640597	0.318	0.062	4.65e-15	8	NOVA2	T1/T2
PHC2	2.45e-09	0.639653	0.635	0.411	4.1e-05	8	PHC2	T1/T2
CNTNAP2	3.01e-07	0.638118	0.271	0.107	0.00504428	8	CNTNAP2	T1/T2
LRRN1	1.56e-07	0.636744	0.482	0.273	0.00260884	8	LRRN1	T1/T2
PTPRG	5.76e-06	0.636176	0.424	0.244	0.0965052	8	PTPRG	T1/T2
SCRN1	4e-09	0.634139	0.471	0.232	6.7e-05	8	SCRN1	T1/T2
MARCKSL1	2.53e-12	0.633889	0.988	0.915	4.24e-08	8	MARCKSL1	T1/T2
NOL4	6.13e-21	0.631949	0.388	0.088	1.03e-16	8	NOL4	T1/T2
CDKN2D	2.67e-05	0.631756	0.318	0.152	0.447792	8	CDKN2D	T1/T2
RPRM	1.6e-06	0.631283	0.259	0.103	0.0267436	8	RPRM	T1/T2
CYFIP2	4.64e-10	0.631244	0.353	0.132	7.77e-06	8	CYFIP2	T1/T2
FAM155A	4e-19	0.631191	0.259	0.043	6.7e-15	8	FAM155A	T1/T2
DYNC1I2	0.000308571	0.628451	0.647	0.624	1	8	DYNC1I2	T1/T2
MAB21L11	7.27e-07	0.628396	0.659	0.431	0.0121846	8	MAB21L1	T1/T2
SHC2	3.61e-07	0.627966	0.424	0.221	0.0060501	8	SHC2	T1/T2
YPEL3	0.00114736	0.622669	0.482	0.374	1	8	YPEL3	T1/T2
SCARB2	3.52e-06	0.622317	0.565	0.408	0.0589824	8	SCARB2	T1/T2
CHN1	2.11e-07	0.622134	0.459	0.246	0.00353787	8	CHN1	T1/T2
C3orf14	3.29e-10	0.622115	0.459	0.2	5.52e-06	8	C3orf14	T1/T2
PGM2L1	1.23e-06	0.621771	0.447	0.242	0.0206876	8	PGM2L1	T1/T2
BRSK2	5.26e-18	0.619298	0.294	0.057	8.82e-14	8	BRSK2	T1/T2
KIF1B	0.00100463	0.616825	0.482	0.368	1	8	KIF1B	T1/T2
ENO12	5.52e-06	0.616162	0.859	0.828	0.0924698	8	ENO1	T1/T2
DYNC1LI1	1.51e-05	0.61476	0.565	0.395	0.253712	8	DYNC1LI1	T1/T2
SYBU	4.64e-15	0.612928	0.2	0.032	7.77e-11	8	SYBU	T1/T2
GDI1	3.25e-11	0.611194	0.553	0.259	5.45e-07	8	GDI1	T1/T2
SRGAP31	2.73e-05	0.606609	0.471	0.292	0.456876	8	SRGAP3	T1/T2
BCL11A	0.000493468	0.605687	0.482	0.361	1	8	BCL11A	T1/T2
DBN1	0.000265559	0.604746	0.671	0.637	1	8	DBN1	T1/T2
MIR217HG	1.46e-14	0.602501	0.318	0.08	2.45e-10	8	MIR217HG	T1/T2
STARD3NL	2.12e-07	0.601781	0.565	0.357	0.00355633	8	STARD3NL	T1/T2
PLPPR3	2.65e-05	0.601779	0.624	0.449	0.444365	8	PLPPR3	T1/T2
CLASP2	3.01e-05	0.599558	0.388	0.234	0.504769	8	CLASP2	T1/T2
SHD	2.99e-23	0.595988	0.306	0.047	5e-19	8	SHD	T1/T2
IDH1	0.00202945	0.594679	0.459	0.342	1	8	IDH1	T1/T2
ATL1	2.81e-07	0.594604	0.365	0.168	0.00470937	8	ATL1	T1/T2
NKAIN1	5.01e-15	0.593758	0.424	0.129	8.39e-11	8	NKAIN1	T1/T2
NBEA	0.000437163	0.593631	0.424	0.288	1	8	NBEA	T1/T2
VAMP2	8.82e-05	0.593158	0.671	0.607	1	8	VAMP2	T1/T2
SKIL	0.00274059	0.592897	0.6	0.521	1	8	SKIL	T1/T2
COX7A2	0.000227644	0.592214	0.812	0.744	1	8	COX7A2	T1/T2
CHST8	1.03e-42	0.587574	0.235	0.011	1.73e-38	8	CHST8	T1/T2
KDM3A	1.26e-05	0.586813	0.4	0.236	0.210871	8	KDM3A	T1/T2
PLK3	2.19e-13	0.586773	0.353	0.109	3.68e-09	8	PLK3	T1/T2
MIR7-3HG	2.17e-53	0.58469	0.235	0.007	3.63e-49	8	MIR7-3HG	T1/T2
TMTC2	4.74e-06	0.582342	0.282	0.126	0.0794796	8	TMTC2	T1/T2
GRINA	0.000629076	0.579688	0.4	0.283	1	8	GRINA	T1/T2
SHF	8.53e-07	0.579456	0.365	0.177	0.0142902	8	SHF	T1/T2
FYN	4.17e-07	0.578767	0.518	0.3	0.00697983	8	FYN	T1/T2
NPDC1	4.52e-06	0.575334	0.471	0.284	0.0756739	8	NPDC1	T1/T2
CELSR2	1.11e-16	0.575073	0.341	0.083	1.85e-12	8	CELSR2	T1/T2
MALAT11	0.000199484	0.573104	1	0.998	1	8	MALAT1	T1/T2
BTF3L4	1.18e-05	0.571966	0.741	0.66	0.196951	8	BTF3L4	T1/T2
NRXN3	1.43e-21	0.571059	0.212	0.024	2.4e-17	8	NRXN3	T1/T2
RIC31	2.32e-05	0.569306	0.318	0.158	0.38858	8	RIC3	T1/T2
CD200	1.27e-06	0.567855	0.471	0.265	0.0212747	8	CD200	T1/T2
ANK2	1.08e-05	0.567434	0.306	0.146	0.180888	8	ANK2	T1/T2
RBFOX3	3.58e-13	0.565981	0.212	0.039	6e-09	8	RBFOX3	T1/T2
KCTD16	1.15e-19	0.565963	0.235	0.033	1.92e-15	8	KCTD16	T1/T2
MACO1	7.36e-06	0.563592	0.4	0.234	0.123229	8	MACO1	T1/T2
PLEKHA8	7e-07	0.56292	0.4	0.205	0.0117336	8	PLEKHA8	T1/T2
ENY2	0.000200676	0.560276	0.729	0.707	1	8	ENY2	T1/T2
APC2	1.78e-21	0.558343	0.365	0.075	2.98e-17	8	APC2	T1/T2
PTGFR	2.22e-24	0.558041	0.2	0.018	3.71e-20	8	PTGFR	T1/T2
GDAP1	1.42e-09	0.557997	0.412	0.18	2.38e-05	8	GDAP1	T1/T2
PCBP3	3.6e-20	0.556167	0.247	0.036	6.03e-16	8	PCBP3	T1/T2
ZIC21	4.37e-08	0.555945	0.506	0.251	0.000732744	8	ZIC2	T1/T2
ZMYM2	0.000227767	0.555021	0.588	0.454	1	8	ZMYM2	T1/T2
PAK3	8.71e-07	0.55467	0.247	0.095	0.0145941	8	PAK3	T1/T2
IGLON5	5.67e-08	0.552683	0.376	0.164	0.00094935	8	IGLON5	T1/T2
AFDN	2.75e-05	0.552422	0.565	0.389	0.460313	8	AFDN	T1/T2
WSB1	1.16e-06	0.552398	0.788	0.816	0.0194805	8	WSB1	T1/T2
CALM21	3.72e-09	0.55228	0.953	0.933	6.23e-05	8	CALM2	T1/T2
FZD31	0.000171574	0.552216	0.482	0.348	1	8	FZD3	T1/T2
ANKRD65	6.79e-18	0.550798	0.353	0.081	1.14e-13	8	ANKRD65	T1/T2
KCNH2	5.34e-06	0.550791	0.141	0.04	0.0895087	8	KCNH2	T1/T2
TPM3	7.48e-05	0.549694	0.635	0.528	1	8	TPM3	T1/T2
PPM1L	3.22e-05	0.549343	0.271	0.131	0.539926	8	PPM1L	T1/T2
ACLY	0.000236886	0.548903	0.341	0.193	1	8	ACLY	T1/T2
KLHL7	0.00109162	0.548861	0.482	0.381	1	8	KLHL7	T1/T2
TTC9B	2.48e-32	0.547103	0.224	0.016	4.15e-28	8	TTC9B	T1/T2
ROBO2	0.00125229	0.546902	0.271	0.159	1	8	ROBO2	T1/T2
HK1	2.67e-06	0.546264	0.447	0.247	0.0446677	8	HK1	T1/T2
STMN3	2.24e-05	0.545319	0.388	0.205	0.374788	8	STMN3	T1/T2
CNTN1	1.61e-05	0.544812	0.176	0.063	0.270487	8	CNTN1	T1/T2
CENPV1	8.53e-07	0.544571	0.788	0.669	0.0142887	8	CENPV	T1/T2
AP1S1	0.00601654	0.544232	0.565	0.477	1	8	AP1S1	T1/T2
MYO16	1.52e-31	0.543295	0.294	0.031	2.54e-27	8	MYO16	T1/T2
RAB33A	1.24e-10	0.542268	0.271	0.08	2.08e-06	8	RAB33A	T1/T2
LIMD2	5.66e-06	0.541902	0.529	0.349	0.0947604	8	LIMD2	T1/T2
HSBP1	0.000392393	0.541307	0.8	0.805	1	8	HSBP1	T1/T2
DACH11	0.00517939	0.54089	0.529	0.446	1	8	DACH1	T1/T2
COTL1	0.000701953	0.539909	0.6	0.484	1	8	COTL1	T1/T2
TTC3	7.95e-06	0.539221	0.847	0.8	0.133171	8	TTC3	T1/T2
HERC1	0.000687551	0.539055	0.353	0.225	1	8	HERC1	T1/T2
CXXC4	1.22e-06	0.538646	0.306	0.131	0.0205077	8	CXXC4	T1/T2
LGR41	0.00290417	0.537085	0.435	0.323	1	8	LGR4	T1/T2
HUWE1	0.00442942	0.537033	0.424	0.334	1	8	HUWE1	T1/T2
ATP6V0A1	7.47e-07	0.535582	0.4	0.202	0.0125075	8	ATP6V0A1	T1/T2
FEZF21	1.17e-09	0.53512	0.388	0.147	1.96e-05	8	FEZF2	T1/T2
SMARCA5	0.000387676	0.53477	0.694	0.632	1	8	SMARCA5	T1/T2
FJX11	0.000266659	0.534071	0.447	0.309	1	8	FJX1	T1/T2
ZSCAN16	6.88e-10	0.533714	0.259	0.076	1.15e-05	8	ZSCAN16	T1/T2
EPB41	0.000599811	0.533314	0.588	0.469	1	8	EPB41	T1/T2
CFL1	8.28e-11	0.532979	0.918	0.914	1.39e-06	8	CFL1	T1/T2
PARP6	1.15e-06	0.531971	0.282	0.119	0.0192454	8	PARP6	T1/T2
YWHAZ	0.00112276	0.531473	0.729	0.729	1	8	YWHAZ	T1/T2
IGFBP22	0.00113746	0.531031	0.835	0.827	1	8	IGFBP2	T1/T2
PCSK7	6.73e-05	0.531012	0.282	0.139	1	8	PCSK7	T1/T2
MT-CO21	3.23e-10	0.530679	0.988	0.971	5.41e-06	8	MT-CO2	T1/T2
TMEM158	3.55e-07	0.530053	0.259	0.096	0.00594278	8	TMEM158	T1/T2
ZNF431	1.27e-06	0.529813	0.482	0.281	0.0212104	8	ZNF431	T1/T2
POU3F1	4.24e-09	0.52876	0.282	0.092	7.1e-05	8	POU3F1	T1/T2
NPTX2	6.4e-21	0.528538	0.212	0.025	1.07e-16	8	NPTX2	T1/T2
SNAPC3	0.00707588	0.528327	0.388	0.301	1	8	SNAPC3	T1/T2
TCEAL7	0.0024598	0.527869	0.647	0.576	1	8	TCEAL7	T1/T2
TBCB	0.00593029	0.527638	0.647	0.607	1	8	TBCB	T1/T2
CDH21	3.96e-06	0.526447	0.565	0.333	0.0663581	8	CDH2	T1/T2
KLHL24	2.38e-05	0.526333	0.529	0.368	0.399212	8	KLHL24	T1/T2
ZNF821	0.000128368	0.52628	0.4	0.262	1	8	ZNF821	T1/T2
RPAIN	2.41e-05	0.526039	0.659	0.569	0.403196	8	RPAIN	T1/T2
FAM19A5	0.000164404	0.525245	0.294	0.163	1	8	FAM19A5	T1/T2
CBARP	6.85e-11	0.525226	0.247	0.065	1.15e-06	8	CBARP	T1/T2
TSPAN13	1.5e-07	0.523596	0.424	0.217	0.0025117	8	TSPAN13	T1/T2
SLIT1	2.85e-06	0.522818	0.165	0.049	0.0477149	8	SLIT1	T1/T2
SHPRH	0.000108993	0.521821	0.553	0.392	1	8	SHPRH	T1/T2
BAZ2B1	0.00356733	0.521596	0.576	0.477	1	8	BAZ2B	T1/T2
CCT2	0.00102763	0.521206	0.765	0.78	1	8	CCT2	T1/T2
ABHD17B	0.00638464	0.521055	0.294	0.2	1	8	ABHD17B	T1/T2
SOX21	5.81e-07	0.519805	0.471	0.208	0.00972896	8	SOX2	T1/T2
GLUL1	5.09e-05	0.519401	0.659	0.594	0.852678	8	GLUL	T1/T2
YIPF6	0.000165082	0.519393	0.482	0.345	1	8	YIPF6	T1/T2
DPYSL5	2.39e-07	0.516353	0.341	0.143	0.00399925	8	DPYSL5	T1/T2
HERC4	0.00314244	0.516181	0.376	0.279	1	8	HERC4	T1/T2
RNF24	1.01e-05	0.516144	0.412	0.222	0.168535	8	RNF24	T1/T2
MXI1	2.34e-07	0.512573	0.588	0.387	0.00391228	8	MXI1	T1/T2
ABRACL1	1.19e-06	0.511465	0.435	0.232	0.0199415	8	ABRACL	T1/T2
SULF21	0.00577988	0.510455	0.341	0.245	1	8	SULF2	T1/T2
SPEN	0.000708581	0.510104	0.471	0.353	1	8	SPEN	T1/T2
SYT5	4e-21	0.509448	0.282	0.045	6.7e-17	8	SYT5	T1/T2
NTRK1	2.19e-11	0.509206	0.188	0.037	3.68e-07	8	NTRK1	T1/T2
ISLR2	3.84e-07	0.508677	0.224	0.074	0.00642689	8	ISLR2	T1/T2
HTATSF1	0.00375817	0.508206	0.612	0.575	1	8	HTATSF1	T1/T2
FAM171A21	0.000497466	0.506198	0.506	0.37	1	8	FAM171A2	T1/T2
SIX61	2.08e-10	0.505678	0.612	0.263	3.49e-06	8	SIX6	T1/T2
RPS6KL1	2.32e-17	0.504673	0.188	0.024	3.88e-13	8	RPS6KL1	T1/T2
STRADB	0.000265322	0.504595	0.376	0.245	1	8	STRADB	T1/T2
RAB6B	4.9e-07	0.504548	0.259	0.098	0.00821377	8	RAB6B	T1/T2
NRN1	0.0014565	0.504326	0.106	0.037	1	8	NRN1	T1/T2
MFNG	8.64e-37	0.50394	0.247	0.016	1.45e-32	8	MFNG	T1/T2
RAB2A	0.00276087	0.503719	0.647	0.63	1	8	RAB2A	T1/T2
SLCO5A1	1.06e-12	0.503347	0.282	0.073	1.77e-08	8	SLCO5A1	T1/T2
MARCKS	1.5e-07	0.502794	0.965	0.91	0.00251926	8	MARCKS	T1/T2
ANKRD10	0.00618648	0.50187	0.518	0.419	1	8	ANKRD10	T1/T2
ZNF292	0.00047995	0.5016	0.671	0.633	1	8	ZNF292	T1/T2
TAGLN2	0.00133003	0.501554	0.376	0.257	1	8	TAGLN2	T1/T2
SEZ6L2	3.57e-14	0.50102	0.294	0.072	5.97e-10	8	SEZ6L2	T1/T2
NFASC	1.57e-11	0.500037	0.188	0.037	2.63e-07	8	NFASC	T1/T2
CENPF1	4.16e-56	2.55792	0.973	0.238	6.97e-52	9	CENPF	RPCs
CKB2	4.06e-42	2.48474	1	0.518	6.81e-38	9	CKB	RPCs
TOP2A1	2.36e-63	2.3645	0.986	0.214	3.96e-59	9	TOP2A	RPCs
HMGB21	1.26e-39	2.16639	1	0.684	2.11e-35	9	HMGB2	RPCs
HIST1H4C1	1.97e-23	2.11674	0.919	0.802	3.31e-19	9	HIST1H4C	RPCs
MKI671	1.17e-90	1.96745	0.973	0.115	1.95e-86	9	MKI67	RPCs
ASPM1	9.6e-81	1.96151	0.892	0.112	1.61e-76	9	ASPM	RPCs
HSPA1A3	1.72e-27	1.8978	1	0.681	2.88e-23	9	HSPA1A	RPCs
SMC41	7.23e-48	1.84674	0.973	0.319	1.21e-43	9	SMC4	RPCs
SOX22	1.06e-60	1.82522	0.986	0.186	1.78e-56	9	SOX2	RPCs
SIX62	3.79e-50	1.75105	0.986	0.248	6.34e-46	9	SIX6	RPCs
TYMS1	2.88e-40	1.65823	0.959	0.333	4.82e-36	9	TYMS	RPCs
CRABP12	3.14e-28	1.63387	1	0.707	5.26e-24	9	CRABP1	RPCs
RAX2	5.88e-46	1.61484	0.986	0.25	9.85e-42	9	RAX	RPCs
NUSAP11	1.75e-68	1.61384	0.959	0.154	2.93e-64	9	NUSAP1	RPCs
MAD2L11	4.5e-58	1.60762	1	0.239	7.54e-54	9	MAD2L1	RPCs
HIST1H1B1	1.7e-57	1.58236	0.797	0.123	2.84e-53	9	HIST1H1B	RPCs
TTYH11	4.97e-49	1.58106	0.838	0.161	8.33e-45	9	TTYH1	RPCs
SFRP21	9.45e-28	1.57861	1	0.563	1.58e-23	9	SFRP2	RPCs
TUBA1B1	1.15e-33	1.55541	1	0.942	1.92e-29	9	TUBA1B	RPCs
CCNB21	1.43e-42	1.54578	0.905	0.234	2.39e-38	9	CCNB2	RPCs
METRN1	1.49e-37	1.537	0.946	0.355	2.5e-33	9	METRN	RPCs
HSPA1B2	3.76e-31	1.53448	0.946	0.362	6.29e-27	9	HSPA1B	RPCs
H2AFX1	1.45e-40	1.48366	0.986	0.368	2.44e-36	9	H2AFX	RPCs
CDK11	8.94e-68	1.46322	0.946	0.151	1.5e-63	9	CDK1	RPCs
MIS18BP11	9.48e-45	1.43823	0.946	0.269	1.59e-40	9	MIS18BP1	RPCs
CKS21	1.69e-38	1.43643	0.959	0.336	2.84e-34	9	CKS2	RPCs
CCND11	3.98e-25	1.4348	0.986	0.644	6.68e-21	9	CCND1	RPCs
HES52	2.08e-37	1.42212	0.703	0.142	3.48e-33	9	HES5	RPCs
KPNA21	4.42e-25	1.40676	0.973	0.453	7.41e-21	9	KPNA2	RPCs
BIRC51	9.78e-74	1.40447	0.959	0.137	1.64e-69	9	BIRC5	RPCs
UBE2C1	6.21e-50	1.3928	0.865	0.165	1.04e-45	9	UBE2C	RPCs
TUBB4B1	3.19e-25	1.37659	1	0.698	5.34e-21	9	TUBB4B	RPCs
CKS1B1	1.51e-36	1.36413	0.973	0.41	2.53e-32	9	CKS1B	RPCs
H2AFZ1	1.03e-31	1.35895	0.986	0.896	1.72e-27	9	H2AFZ	RPCs
TPX21	1.37e-62	1.34574	0.838	0.119	2.3e-58	9	TPX2	RPCs
DAPL11	4.69e-30	1.34552	0.919	0.326	7.86e-26	9	DAPL1	RPCs
CENPE1	5.72e-61	1.33446	0.716	0.087	9.58e-57	9	CENPE	RPCs
LMNB11	6.5e-36	1.3301	0.959	0.381	1.09e-31	9	LMNB1	RPCs
SPP11	8.08e-43	1.32707	0.838	0.176	1.35e-38	9	SPP1	RPCs
DNAJB1	1.03e-22	1.30943	0.919	0.449	1.72e-18	9	DNAJB1	RPCs
CCNA21	3.7e-99	1.2897	0.865	0.073	6.21e-95	9	CCNA2	RPCs
HMX11	4.64e-36	1.28172	0.838	0.207	7.77e-32	9	HMX1	RPCs
ASCL1	1.78e-99	1.26768	0.757	0.054	2.98e-95	9	ASCL1	RPCs
NUF21	8.12e-94	1.25991	0.851	0.079	1.36e-89	9	NUF2	RPCs
PTTG11	4.21e-32	1.24541	0.878	0.272	7.05e-28	9	PTTG1	RPCs
CKAP21	9.57e-45	1.24376	0.797	0.163	1.6e-40	9	CKAP2	RPCs
HMGN21	9.36e-32	1.24084	1	0.893	1.57e-27	9	HMGN2	RPCs
HIST1H1D1	9.06e-25	1.2395	0.757	0.268	1.52e-20	9	HIST1H1D	RPCs
ARL6IP11	6.34e-17	1.23488	0.892	0.472	1.06e-12	9	ARL6IP1	RPCs
HSP90AA12	8.69e-27	1.23467	1	0.964	1.46e-22	9	HSP90AA1	RPCs
CCNB11	1.12e-41	1.22746	0.811	0.163	1.88e-37	9	CCNB1	RPCs
SMC21	1.74e-37	1.22435	0.932	0.317	2.91e-33	9	SMC2	RPCs
RORB2	1.36e-42	1.20701	0.959	0.229	2.28e-38	9	RORB	RPCs
FZD51	1.36e-55	1.20278	0.838	0.139	2.28e-51	9	FZD5	RPCs
DEK2	4.52e-32	1.18518	1	0.779	7.58e-28	9	DEK	RPCs
HES61	1.24e-17	1.17619	0.649	0.198	2.07e-13	9	HES6	RPCs
HMGA11	6.63e-24	1.17463	0.959	0.633	1.11e-19	9	HMGA1	RPCs
MAB21L12	7.63e-28	1.16235	0.986	0.418	1.28e-23	9	MAB21L1	RPCs
UBE2T1	4.59e-51	1.16171	0.946	0.213	7.69e-47	9	UBE2T	RPCs
NDC801	1.03e-84	1.16116	0.824	0.08	1.73e-80	9	NDC80	RPCs
NEK21	1.03e-79	1.15993	0.73	0.064	1.72e-75	9	NEK2	RPCs
KIFC11	8.99e-91	1.14153	0.824	0.075	1.51e-86	9	KIFC1	RPCs
CCDC341	9.51e-29	1.13844	0.946	0.412	1.59e-24	9	CCDC34	RPCs
KIF20B1	1.46e-45	1.12493	0.851	0.184	2.44e-41	9	KIF20B	RPCs
PAX62	2.23e-25	1.12385	1	0.402	3.74e-21	9	PAX6	RPCs
HIST2H2AC1	2.81e-24	1.1104	0.716	0.224	4.71e-20	9	HIST2H2AC	RPCs
CDC201	1.45e-37	1.10973	0.595	0.095	2.43e-33	9	CDC20	RPCs
PBK1	2.92e-82	1.09494	0.865	0.091	4.9e-78	9	PBK	RPCs
PSIP12	1.08e-28	1.09269	0.973	0.737	1.81e-24	9	PSIP1	RPCs
PCNA2	1.23e-25	1.09108	0.892	0.366	2.06e-21	9	PCNA	RPCs
SLF11	2.03e-33	1.09001	0.892	0.282	3.39e-29	9	SLF1	RPCs
AURKB1	1.54e-72	1.08122	0.878	0.11	2.58e-68	9	AURKB	RPCs
RAD51AP11	1.8e-62	1.07871	0.797	0.109	3.01e-58	9	RAD51AP1	RPCs
GTSE11	1.97e-65	1.06335	0.703	0.075	3.3e-61	9	GTSE1	RPCs
LHX22	1.58e-36	1.06014	0.932	0.253	2.65e-32	9	LHX2	RPCs
DLGAP51	5.56e-77	1.05425	0.824	0.086	9.31e-73	9	DLGAP5	RPCs
SPC251	2.44e-100	1.05321	0.851	0.07	4.08e-96	9	SPC25	RPCs
TMPO1	1.13e-24	1.04931	0.959	0.616	1.9e-20	9	TMPO	RPCs
NUCKS11	1.05e-22	1.04699	1	0.868	1.76e-18	9	NUCKS1	RPCs
UBE2S1	2.84e-17	1.04487	0.946	0.601	4.76e-13	9	UBE2S	RPCs
ZWINT1	2.18e-51	1.03887	0.919	0.179	3.65e-47	9	ZWINT	RPCs
ALDH1A11	2.24e-14	1.03854	0.514	0.169	3.75e-10	9	ALDH1A1	RPCs
LBR	1.16e-22	1.0299	0.878	0.42	1.95e-18	9	LBR	RPCs
PIMREG1	9.22e-90	1.02968	0.851	0.08	1.54e-85	9	PIMREG	RPCs
WEE1	2.7e-37	1.02074	0.865	0.233	4.53e-33	9	WEE1	RPCs
MCM71	4.22e-26	1.01361	0.919	0.381	7.06e-22	9	MCM7	RPCs
ECT21	8.75e-56	1.01171	0.73	0.099	1.47e-51	9	ECT2	RPCs
FBXO51	4.18e-40	1.01056	0.784	0.176	7e-36	9	FBXO5	RPCs
ATAD2	3.65e-51	0.999822	0.824	0.152	6.12e-47	9	ATAD2	RPCs
CDCA31	1.19e-82	0.997615	0.811	0.077	1.99e-78	9	CDCA3	RPCs
SMC3	2.47e-23	0.995637	0.932	0.693	4.14e-19	9	SMC3	RPCs
COL9A12	1.38e-27	0.982112	0.919	0.358	2.31e-23	9	COL9A1	RPCs
CYP1B12	0.000230783	0.981812	0.5	0.341	1	9	CYP1B1	RPCs
ZIC22	6.57e-37	0.980786	0.919	0.234	1.1e-32	9	ZIC2	RPCs
CKAP2L1	2.89e-91	0.97666	0.797	0.066	4.85e-87	9	CKAP2L	RPCs
ORC61	1.15e-47	0.971703	0.865	0.187	1.92e-43	9	ORC6	RPCs
ANP32E1	1.55e-23	0.969245	0.959	0.555	2.59e-19	9	ANP32E	RPCs
NCAPG1	8.17e-71	0.949312	0.77	0.088	1.37e-66	9	NCAPG	RPCs
DKK31	1.08e-23	0.944646	0.838	0.337	1.82e-19	9	DKK3	RPCs
CHD72	3.99e-27	0.943486	0.878	0.307	6.68e-23	9	CHD7	RPCs
KIF151	2.83e-74	0.942921	0.743	0.074	4.74e-70	9	KIF15	RPCs
H1FX1	3.74e-18	0.942531	0.986	0.842	6.26e-14	9	H1FX	RPCs
KIF231	3.72e-59	0.93708	0.662	0.076	6.24e-55	9	KIF23	RPCs
KIF2C1	3.38e-76	0.935846	0.703	0.062	5.66e-72	9	KIF2C	RPCs
HMMR1	3e-62	0.930181	0.622	0.061	5.02e-58	9	HMMR	RPCs
RRM21	1.56e-79	0.919918	0.784	0.076	2.61e-75	9	RRM2	RPCs
BUB31	2.25e-21	0.919866	0.946	0.459	3.76e-17	9	BUB3	RPCs
PCLAF1	2.33e-26	0.916962	0.878	0.297	3.9e-22	9	PCLAF	RPCs
CLSPN1	7.09e-53	0.916868	0.77	0.123	1.19e-48	9	CLSPN	RPCs
EZH21	6.42e-27	0.915869	0.838	0.292	1.08e-22	9	EZH2	RPCs
SGO11	1.87e-72	0.915704	0.797	0.09	3.13e-68	9	SGO1	RPCs
CDH22	1.16e-25	0.908453	0.892	0.32	1.94e-21	9	CDH2	RPCs
RTKN21	9.28e-61	0.906563	0.689	0.081	1.55e-56	9	RTKN2	RPCs
BRCA1	3.56e-59	0.904267	0.73	0.096	5.96e-55	9	BRCA1	RPCs
FEN1	7.79e-50	0.902735	0.784	0.14	1.3e-45	9	FEN1	RPCs
SIX33	1.16e-23	0.899068	0.959	0.329	1.95e-19	9	SIX3	RPCs
DBF41	6.78e-33	0.895936	0.811	0.221	1.14e-28	9	DBF4	RPCs
FOXD11	1.9e-16	0.892761	0.73	0.289	3.18e-12	9	FOXD1	RPCs
[truncated: 1,830 more rows]

## Sheet: PCW7.7_15222
15222; 7.7 PCW; Full Eye
	p_val	avg_log2FC	pct.1	pct.2	p_val_adj	cluster	gene	cell fate
OSR2	0	2.49516	0.955	0.095	0	0	OSR2	corneal endothelium
DCN	9.72e-249	2.36024	0.997	0.496	1.89e-244	0	DCN	corneal endothelium
FBLN1	4.9e-289	2.16516	0.998	0.527	9.52e-285	0	FBLN1	corneal endothelium
PLAC9	1.09e-303	2.06954	0.973	0.348	2.11e-299	0	PLAC9	corneal endothelium
DLK1	0	2.02861	0.8	0.097	0	0	DLK1	corneal endothelium
NBL1	0	1.97122	0.884	0.175	0	0	NBL1	corneal endothelium
PDGFRL	0	1.882	0.891	0.148	0	0	PDGFRL	corneal endothelium
POSTN	1.94e-243	1.86219	0.771	0.179	3.77e-239	0	POSTN	corneal endothelium
ITM2A	6.51e-206	1.80717	0.953	0.397	1.26e-201	0	ITM2A	corneal endothelium
VIM	1.1e-231	1.77713	1	0.939	2.13e-227	0	VIM	corneal endothelium
CTHRC1	1.3e-149	1.66872	0.833	0.345	2.52e-145	0	CTHRC1	corneal endothelium
KLF4	4.99e-296	1.66421	0.771	0.144	9.69e-292	0	KLF4	corneal endothelium
MGP	2.56e-108	1.60124	0.798	0.384	4.96e-104	0	MGP	corneal endothelium
GPC3	1.36e-132	1.53146	0.742	0.301	2.63e-128	0	GPC3	corneal endothelium
ACKR3	5.71e-256	1.52849	0.786	0.183	1.11e-251	0	ACKR3	corneal endothelium
TGFBI	8.32e-240	1.52534	0.96	0.356	1.62e-235	0	TGFBI	corneal endothelium
MEG3	5.06e-183	1.51681	0.983	0.485	9.82e-179	0	MEG3	corneal endothelium
TCF4	6.78e-157	1.47602	0.951	0.539	1.32e-152	0	TCF4	corneal endothelium
LGALS1	3.41e-191	1.41599	1	0.744	6.61e-187	0	LGALS1	corneal endothelium
FOS	6.56e-113	1.41004	0.973	0.678	1.27e-108	0	FOS	corneal endothelium
KCNQ1OT1	2.2e-153	1.40331	0.983	0.512	4.28e-149	0	KCNQ1OT1	corneal endothelium
TWIST1	1.15e-248	1.40133	0.859	0.232	2.24e-244	0	TWIST1	corneal endothelium
COL6A2	1.36e-192	1.38582	1	0.506	2.64e-188	0	COL6A2	corneal endothelium
LUZP2	0	1.37259	0.692	0.043	0	0	LUZP2	corneal endothelium
COL3A1	3.03e-180	1.36372	1	0.62	5.89e-176	0	COL3A1	corneal endothelium
ALX1	7.14e-249	1.33096	0.754	0.165	1.39e-244	0	ALX1	corneal endothelium
DKK2	7.9e-168	1.32912	0.697	0.201	1.53e-163	0	DKK2	corneal endothelium
S100A10	6.83e-112	1.3227	0.835	0.428	1.33e-107	0	S100A10	corneal endothelium
CREB5	5.04e-222	1.31918	0.904	0.308	9.79e-218	0	CREB5	corneal endothelium
CRABP2	9.33e-193	1.31678	0.976	0.455	1.81e-188	0	CRABP2	corneal endothelium
PMP22	1.43e-197	1.30789	0.948	0.374	2.77e-193	0	PMP22	corneal endothelium
TES	1.61e-248	1.29451	0.783	0.187	3.14e-244	0	TES	corneal endothelium
FOXL2	0	1.27981	0.606	0.024	0	0	FOXL2	corneal endothelium
PLEKHA5	1.59e-226	1.27305	0.816	0.232	3.09e-222	0	PLEKHA5	corneal endothelium
IGFBP5	8.81e-110	1.24333	0.96	0.492	1.71e-105	0	IGFBP5	corneal endothelium
FSTL1	4.94e-157	1.21652	0.963	0.455	9.59e-153	0	FSTL1	corneal endothelium
MFAP4	1.67e-179	1.20578	0.97	0.382	3.24e-175	0	MFAP4	corneal endothelium
COL21A1	6.75e-201	1.17931	0.687	0.159	1.31e-196	0	COL21A1	corneal endothelium
COL1A2	2.1e-145	1.17511	1	0.678	4.07e-141	0	COL1A2	corneal endothelium
PPIC	9.16e-171	1.1657	0.768	0.258	1.78e-166	0	PPIC	corneal endothelium
IGFBP6	2.08e-105	1.15722	0.599	0.211	4.04e-101	0	IGFBP6	corneal endothelium
LUM	2.38e-87	1.155	0.798	0.427	4.61e-83	0	LUM	corneal endothelium
COL6A1	1.33e-166	1.14624	0.981	0.485	2.59e-162	0	COL6A1	corneal endothelium
MMP2	3.77e-167	1.12377	0.886	0.337	7.32e-163	0	MMP2	corneal endothelium
ZFP36L1	3.82e-136	1.11848	0.976	0.572	7.41e-132	0	ZFP36L1	corneal endothelium
RBPJ	1.7e-164	1.10718	0.933	0.444	3.31e-160	0	RBPJ	corneal endothelium
SULF1	9.89e-167	1.1061	0.754	0.237	1.92e-162	0	SULF1	corneal endothelium
COL5A2	2.97e-196	1.07052	0.946	0.336	5.77e-192	0	COL5A2	corneal endothelium
BCHE	1.98e-195	1.04507	0.609	0.117	3.84e-191	0	BCHE	corneal endothelium
PCDH10	0	1.04106	0.689	0.076	0	0	PCDH10	corneal endothelium
LY6E	6.98e-159	1.03881	0.944	0.404	1.36e-154	0	LY6E	corneal endothelium
PRRX1	3.57e-189	1.03846	0.862	0.28	6.93e-185	0	PRRX1	corneal endothelium
ADAMTS1	3.87e-160	1.03217	0.753	0.243	7.52e-156	0	ADAMTS1	corneal endothelium
FOSB	1.9e-100	1.03155	0.801	0.361	3.7e-96	0	FOSB	corneal endothelium
NELL2	4.34e-163	1.02431	0.776	0.239	8.43e-159	0	NELL2	corneal endothelium
FBN1	8.36e-151	1.00352	0.808	0.291	1.62e-146	0	FBN1	corneal endothelium
EDNRA	3.98e-201	1.00201	0.773	0.209	7.73e-197	0	EDNRA	corneal endothelium
FBLN2	1.68e-180	0.998841	0.808	0.256	3.26e-176	0	FBLN2	corneal endothelium
SEMA3E	1.28e-191	0.998128	0.487	0.068	2.49e-187	0	SEMA3E	corneal endothelium
COL1A1	1.41e-121	0.99315	0.997	0.64	2.73e-117	0	COL1A1	corneal endothelium
RND3	1.68e-133	0.983112	0.837	0.352	3.26e-129	0	RND3	corneal endothelium
LHFPL6	5.89e-173	0.982678	0.759	0.249	1.14e-168	0	LHFPL6	corneal endothelium
LTBP4	1.4e-138	0.980007	0.83	0.332	2.72e-134	0	LTBP4	corneal endothelium
AKAP12	2.86e-107	0.967092	0.803	0.355	5.55e-103	0	AKAP12	corneal endothelium
KCTD12	2.9e-168	0.966842	0.803	0.257	5.63e-164	0	KCTD12	corneal endothelium
LOX	2.4e-184	0.94409	0.695	0.169	4.67e-180	0	LOX	corneal endothelium
SEMA3C	1.06e-233	0.943271	0.465	0.043	2.05e-229	0	SEMA3C	corneal endothelium
PDGFRA	6.21e-166	0.938985	0.857	0.298	1.21e-161	0	PDGFRA	corneal endothelium
NCAM2	6.92e-264	0.935589	0.63	0.086	1.34e-259	0	NCAM2	corneal endothelium
SRPX	1.03e-173	0.92797	0.641	0.156	2e-169	0	SRPX	corneal endothelium
TSHZ2	1.04e-224	0.917938	0.633	0.106	2.02e-220	0	TSHZ2	corneal endothelium
COL9A1	1.07e-98	0.914495	0.621	0.234	2.09e-94	0	COL9A1	corneal endothelium
NFIB	8.05e-152	0.909138	0.896	0.351	1.56e-147	0	NFIB	corneal endothelium
SPARC	4.33e-113	0.90909	0.997	0.597	8.41e-109	0	SPARC	corneal endothelium
MT-ND5	1.76e-123	0.908794	0.998	0.711	3.41e-119	0	MT-ND5	corneal endothelium
NFIA	6.43e-156	0.890382	0.83	0.294	1.25e-151	0	NFIA	corneal endothelium
MFAP2	6.83e-122	0.887227	0.896	0.393	1.33e-117	0	MFAP2	corneal endothelium
HSPA6	8.36e-47	0.876167	0.392	0.148	1.62e-42	0	HSPA6	corneal endothelium
FLRT3	1.69e-100	0.875409	0.662	0.251	3.28e-96	0	FLRT3	corneal endothelium
FOXP2	7.8e-121	0.874153	0.736	0.279	1.51e-116	0	FOXP2	corneal endothelium
SOCS3	2.26e-83	0.864442	0.88	0.428	4.38e-79	0	SOCS3	corneal endothelium
TRIL	8.12e-269	0.856639	0.549	0.055	1.58e-264	0	TRIL	corneal endothelium
LAPTM4A	1.46e-112	0.852964	0.99	0.633	2.83e-108	0	LAPTM4A	corneal endothelium
FAP	9.46e-197	0.852216	0.608	0.113	1.84e-192	0	FAP	corneal endothelium
COL5A1	4.78e-158	0.845497	0.918	0.354	9.28e-154	0	COL5A1	corneal endothelium
ARID5B	2.79e-159	0.84197	0.785	0.252	5.41e-155	0	ARID5B	corneal endothelium
CD99	3.72e-119	0.838943	0.936	0.451	7.22e-115	0	CD99	corneal endothelium
PLAT	2.4e-98	0.835302	0.512	0.146	4.66e-94	0	PLAT	corneal endothelium
SNHG8	3.92e-105	0.832343	0.951	0.552	7.62e-101	0	SNHG8	corneal endothelium
COL14A1	3.79e-166	0.826581	0.566	0.115	7.36e-162	0	COL14A1	corneal endothelium
CCDC80	2.48e-137	0.823643	0.84	0.323	4.81e-133	0	CCDC80	corneal endothelium
PCDH18	1.37e-132	0.823172	0.806	0.299	2.66e-128	0	PCDH18	corneal endothelium
SPRY1	3e-141	0.821835	0.589	0.155	5.82e-137	0	SPRY1	corneal endothelium
AHNAK	1.66e-143	0.819582	0.795	0.291	3.23e-139	0	AHNAK	corneal endothelium
NOV	9.63e-104	0.817509	0.333	0.06	1.87e-99	0	NOV	corneal endothelium
SYNPO2	3.23e-197	0.815326	0.584	0.106	6.26e-193	0	SYNPO2	corneal endothelium
RUNX1T1	4.17e-132	0.813882	0.781	0.31	8.09e-128	0	RUNX1T1	corneal endothelium
TWIST2	4.92e-123	0.809322	0.668	0.219	9.56e-119	0	TWIST2	corneal endothelium
S100A11	2.48e-92	0.807029	0.971	0.508	4.81e-88	0	S100A11	corneal endothelium
CNTFR	2.56e-218	0.803689	0.71	0.144	4.98e-214	0	CNTFR	corneal endothelium
MME	0	0.8016	0.524	0.031	0	0	MME	corneal endothelium
PCDH9	2.54e-146	0.795188	0.594	0.144	4.94e-142	0	PCDH9	corneal endothelium
NTRK2	1.23e-229	0.790893	0.369	0.02	2.39e-225	0	NTRK2	corneal endothelium
IGFBP4	1.54e-121	0.790049	0.901	0.393	2.98e-117	0	IGFBP4	corneal endothelium
CD63	9.62e-115	0.786588	0.997	0.727	1.87e-110	0	CD63	corneal endothelium
ID2	1.98e-87	0.784308	0.847	0.413	3.84e-83	0	ID2	corneal endothelium
CTSK	2.37e-116	0.782755	0.845	0.346	4.6e-112	0	CTSK	corneal endothelium
MYADM	5.09e-136	0.779747	0.672	0.21	9.89e-132	0	MYADM	corneal endothelium
GLT8D2	1.15e-129	0.77664	0.81	0.304	2.23e-125	0	GLT8D2	corneal endothelium
C1QTNF7	1.37e-225	0.770453	0.586	0.086	2.66e-221	0	C1QTNF7	corneal endothelium
EGR1	7.75e-60	0.759279	0.825	0.468	1.5e-55	0	EGR1	corneal endothelium
SPON2	2.22e-232	0.757358	0.407	0.028	4.31e-228	0	SPON2	corneal endothelium
GLIPR2	1.36e-127	0.753128	0.678	0.239	2.65e-123	0	GLIPR2	corneal endothelium
IFI27L2	4.57e-103	0.749858	0.719	0.311	8.87e-99	0	IFI27L2	corneal endothelium
ANXA5	7.38e-98	0.744862	0.941	0.543	1.43e-93	0	ANXA5	corneal endothelium
OLFML3	1.98e-111	0.742701	0.842	0.332	3.84e-107	0	OLFML3	corneal endothelium
GAS1	5.81e-97	0.740991	0.764	0.318	1.13e-92	0	GAS1	corneal endothelium
SULT1E1	4.24e-43	0.737561	0.571	0.276	8.22e-39	0	SULT1E1	corneal endothelium
IGF2.1	1.39e-133	0.734835	0.604	0.171	2.71e-129	0	IGF2.1	corneal endothelium
MXRA5	2.66e-100	0.733587	0.641	0.228	5.16e-96	0	MXRA5	corneal endothelium
MDK	1.14e-85	0.728265	0.997	0.759	2.21e-81	0	MDK	corneal endothelium
BMP4	5.7e-166	0.716536	0.529	0.097	1.11e-161	0	BMP4	corneal endothelium
JUN	4.37e-42	0.713703	0.965	0.679	8.49e-38	0	JUN	corneal endothelium
ANKRD29	1.68e-221	0.713172	0.428	0.038	3.26e-217	0	ANKRD29	corneal endothelium
TMEM59L	5.77e-171	0.710805	0.549	0.106	1.12e-166	0	TMEM59L	corneal endothelium
ITM2C	1.62e-93	0.70517	0.975	0.527	3.14e-89	0	ITM2C	corneal endothelium
LDB2	7.27e-184	0.692015	0.53	0.089	1.41e-179	0	LDB2	corneal endothelium
ADAMTS5	6.6e-178	0.689554	0.485	0.074	1.28e-173	0	ADAMTS5	corneal endothelium
RRBP1	3.6e-102	0.687815	0.833	0.354	7e-98	0	RRBP1	corneal endothelium
EBF1	4.96e-117	0.682179	0.645	0.211	9.63e-113	0	EBF1	corneal endothelium
CMBL	1.78e-120	0.681523	0.773	0.289	3.45e-116	0	CMBL	corneal endothelium
JUNB	2.4e-47	0.679436	0.892	0.597	4.67e-43	0	JUNB	corneal endothelium
SLIT3	6.58e-144	0.678647	0.507	0.109	1.28e-139	0	SLIT3	corneal endothelium
EMILIN3	8.51e-184	0.67686	0.53	0.087	1.65e-179	0	EMILIN3	corneal endothelium
HIC1	1.51e-140	0.676707	0.606	0.16	2.94e-136	0	HIC1	corneal endothelium
LMNA	5.42e-94	0.671461	0.788	0.347	1.05e-89	0	LMNA	corneal endothelium
TNFAIP6	6.48e-228	0.670699	0.379	0.023	1.26e-223	0	TNFAIP6	corneal endothelium
SOCS1	2.61e-84	0.668974	0.633	0.252	5.06e-80	0	SOCS1	corneal endothelium
CCND2	6.1e-112	0.667115	0.86	0.365	1.18e-107	0	CCND2	corneal endothelium
AC245595.1	2.27e-115	0.66478	0.658	0.23	4.41e-111	0	AC245595.1	corneal endothelium
ELN	1.56e-105	0.659134	0.798	0.315	3.04e-101	0	ELN	corneal endothelium
ANGPTL1	1.11e-210	0.657156	0.375	0.027	2.16e-206	0	ANGPTL1	corneal endothelium
PDLIM2	5.56e-111	0.655338	0.751	0.291	1.08e-106	0	PDLIM2	corneal endothelium
EIF3E	3.94e-78	0.652492	0.978	0.716	7.66e-74	0	EIF3E	corneal endothelium
EGFL6	7.08e-94	0.651068	0.806	0.314	1.38e-89	0	EGFL6	corneal endothelium
NRP1	1.15e-116	0.650425	0.645	0.209	2.24e-112	0	NRP1	corneal endothelium
CACNB4	1.62e-166	0.650163	0.461	0.073	3.15e-162	0	CACNB4	corneal endothelium
CRYL1	5.58e-148	0.649884	0.609	0.157	1.08e-143	0	CRYL1	corneal endothelium
LRRC17	1.67e-120	0.649776	0.747	0.261	3.25e-116	0	LRRC17	corneal endothelium
PALLD	3.22e-115	0.649574	0.741	0.282	6.26e-111	0	PALLD	corneal endothelium
KCNS3	2.04e-245	0.649061	0.401	0.024	3.96e-241	0	KCNS3	corneal endothelium
MARCKS	3.68e-61	0.648235	0.992	0.734	7.15e-57	0	MARCKS	corneal endothelium
ARL6IP5	1.65e-98	0.646298	0.882	0.45	3.2e-94	0	ARL6IP5	corneal endothelium
FAM162A	8.69e-114	0.645039	0.855	0.384	1.69e-109	0	FAM162A	corneal endothelium
FAM43A	1.23e-141	0.6438	0.593	0.146	2.39e-137	0	FAM43A	corneal endothelium
IFNGR2	8.71e-109	0.643402	0.818	0.358	1.69e-104	0	IFNGR2	corneal endothelium
SELENOM	1.65e-107	0.643354	0.8	0.324	3.2e-103	0	SELENOM	corneal endothelium
FST	8.01e-99	0.642552	0.556	0.171	1.56e-94	0	FST	corneal endothelium
C2orf40	3.5e-67	0.637105	0.663	0.293	6.8e-63	0	C2orf40	corneal endothelium
ZFP36	1.2e-53	0.634373	0.721	0.367	2.34e-49	0	ZFP36	corneal endothelium
P4HA1	2.59e-103	0.632199	0.744	0.293	5.02e-99	0	P4HA1	corneal endothelium
FCGRT	3.92e-99	0.631702	0.877	0.381	7.61e-95	0	FCGRT	corneal endothelium
NDFIP1	6.68e-71	0.628457	0.869	0.502	1.3e-66	0	NDFIP1	corneal endothelium
CD44	2.78e-142	0.626974	0.399	0.062	5.41e-138	0	CD44	corneal endothelium
LEPR	2.45e-139	0.624399	0.338	0.042	4.76e-135	0	LEPR	corneal endothelium
SLC8A1	2.05e-135	0.62077	0.374	0.055	3.98e-131	0	SLC8A1	corneal endothelium
FBLN5	1.33e-93	0.615609	0.737	0.282	2.59e-89	0	FBLN5	corneal endothelium
ISLR	8.21e-113	0.615168	0.502	0.13	1.59e-108	0	ISLR	corneal endothelium
LGALS3	7.16e-138	0.60568	0.663	0.184	1.39e-133	0	LGALS3	corneal endothelium
LRRN4CL	0	0.604945	0.416	0.013	0	0	LRRN4CL	corneal endothelium
AC020916.1	6.85e-84	0.603798	0.517	0.172	1.33e-79	0	AC020916.1	corneal endothelium
RPL34	2.98e-99	0.601369	1	0.985	5.78e-95	0	RPL34	corneal endothelium
ANXA2	1.95e-58	0.60018	0.951	0.61	3.79e-54	0	ANXA2	corneal endothelium
THBS4	2.03e-30	0.597138	0.239	0.085	3.95e-26	0	THBS4	corneal endothelium
WSB1	2.93e-72	0.596481	0.96	0.597	5.69e-68	0	WSB1	corneal endothelium
2011-09-01	3.13e-71	0.594124	0.845	0.44	6.07e-67	0	2011-09-01	corneal endothelium
FGFR1	3.18e-96	0.591128	0.801	0.346	6.17e-92	0	FGFR1	corneal endothelium
IL11RA	8.99e-72	0.590394	0.875	0.406	1.75e-67	0	IL11RA	corneal endothelium
EMP3	1.62e-71	0.584299	0.901	0.511	3.15e-67	0	EMP3	corneal endothelium
INHBA	2.3e-72	0.581966	0.387	0.116	4.47e-68	0	INHBA	corneal endothelium
MAGED2	3.4e-61	0.581811	0.987	0.657	6.6e-57	0	MAGED2	corneal endothelium
OSR1	2.77e-225	0.581059	0.354	0.018	5.38e-221	0	OSR1	corneal endothelium
PEG10	7.65e-74	0.58039	0.67	0.291	1.48e-69	0	PEG10	corneal endothelium
RPS26	2.89e-84	0.576228	0.995	0.937	5.6e-80	0	RPS26	corneal endothelium
RPS29	1.16e-96	0.57293	0.997	0.952	2.25e-92	0	RPS29	corneal endothelium
DLC1	2.72e-107	0.570287	0.655	0.228	5.28e-103	0	DLC1	corneal endothelium
BASP1	2.75e-75	0.568666	0.97	0.63	5.34e-71	0	BASP1	corneal endothelium
RARG	1.09e-105	0.567795	0.614	0.205	2.12e-101	0	RARG	corneal endothelium
COL16A1	2.31e-129	0.567601	0.62	0.173	4.49e-125	0	COL16A1	corneal endothelium
SEMA3A	8.05e-109	0.56704	0.577	0.173	1.56e-104	0	SEMA3A	corneal endothelium
RPL10A	3.46e-70	0.566656	0.997	0.952	6.72e-66	0	RPL10A	corneal endothelium
EPHB3	3.19e-113	0.566476	0.586	0.175	6.19e-109	0	EPHB3	corneal endothelium
FOXP1	2.66e-62	0.563613	0.879	0.458	5.16e-58	0	FOXP1	corneal endothelium
RPL17	5.27e-63	0.562431	0.965	0.643	1.02e-58	0	RPL17	corneal endothelium
TPBG	9.11e-90	0.561401	0.761	0.319	1.77e-85	0	TPBG	corneal endothelium
EPHA7	1.36e-99	0.561002	0.461	0.123	2.63e-95	0	EPHA7	corneal endothelium
ZNF503	2.36e-104	0.560156	0.71	0.254	4.59e-100	0	ZNF503	corneal endothelium
ARHGAP20	8.55e-163	0.55861	0.47	0.077	1.66e-158	0	ARHGAP20	corneal endothelium
VGLL4	2.38e-91	0.557798	0.776	0.345	4.62e-87	0	VGLL4	corneal endothelium
C1R	3.75e-93	0.55587	0.566	0.195	7.27e-89	0	C1R	corneal endothelium
LIMA1	8.28e-87	0.555583	0.655	0.259	1.61e-82	0	LIMA1	corneal endothelium
RPS8	4.74e-80	0.554281	0.998	0.993	9.2e-76	0	RPS8	corneal endothelium
FHL3	2.31e-94	0.549632	0.714	0.282	4.48e-90	0	FHL3	corneal endothelium
ADD3	4.56e-88	0.548332	0.707	0.302	8.85e-84	0	ADD3	corneal endothelium
NENF	2.5e-92	0.548017	0.833	0.398	4.85e-88	0	NENF	corneal endothelium
AXL	1.84e-101	0.54723	0.697	0.262	3.58e-97	0	AXL	corneal endothelium
PTH1R	4.29e-109	0.546742	0.707	0.252	8.34e-105	0	PTH1R	corneal endothelium
APCDD1	1.03e-102	0.546293	0.342	0.061	1.99e-98	0	APCDD1	corneal endothelium
ARRDC3	2.07e-71	0.546091	0.85	0.445	4.01e-67	0	ARRDC3	corneal endothelium
BICC1	4.81e-108	0.542583	0.582	0.178	9.33e-104	0	BICC1	corneal endothelium
WNT5A	1.55e-110	0.541128	0.505	0.135	3e-106	0	WNT5A	corneal endothelium
CRLF1	4.42e-169	0.540711	0.271	0.014	8.59e-165	0	CRLF1	corneal endothelium
RPL30	1.79e-95	0.53878	1	0.989	3.48e-91	0	RPL30	corneal endothelium
FGF7	1.28e-82	0.538105	0.207	0.026	2.48e-78	0	FGF7	corneal endothelium
HIF3A	1.24e-88	0.537103	0.737	0.309	2.41e-84	0	HIF3A	corneal endothelium
HSPA5	1.28e-50	0.531757	0.973	0.697	2.48e-46	0	HSPA5	corneal endothelium
TMX4	1.02e-82	0.531741	0.608	0.238	1.98e-78	0	TMX4	corneal endothelium
ZBTB20	4.59e-83	0.53084	0.625	0.243	8.92e-79	0	ZBTB20	corneal endothelium
TFAP2B	2.18e-107	0.528862	0.322	0.05	4.23e-103	0	TFAP2B	corneal endothelium
RPL9	2.58e-82	0.528749	1	0.98	5.02e-78	0	RPL9	corneal endothelium
COL6A3	1.01e-77	0.52794	0.665	0.265	1.97e-73	0	COL6A3	corneal endothelium
ALDH7A1	3.73e-70	0.527244	0.827	0.41	7.24e-66	0	ALDH7A1	corneal endothelium
C7orf50	4.51e-81	0.522182	0.84	0.421	8.75e-77	0	C7orf50	corneal endothelium
SLITRK6	6.06e-101	0.521163	0.387	0.083	1.18e-96	0	SLITRK6	corneal endothelium
MDFIC	9.91e-80	0.519439	0.609	0.24	1.92e-75	0	MDFIC	corneal endothelium
SH3BGRL	7.48e-74	0.518954	0.924	0.512	1.45e-69	0	SH3BGRL	corneal endothelium
H1F0	5.01e-51	0.51863	0.81	0.479	9.73e-47	0	H1F0	corneal endothelium
LEPROT	6.06e-63	0.518248	0.827	0.456	1.18e-58	0	LEPROT	corneal endothelium
STK3	1.28e-116	0.517769	0.524	0.14	2.48e-112	0	STK3	corneal endothelium
COX6C	1.89e-64	0.516299	0.971	0.679	3.66e-60	0	COX6C	corneal endothelium
NRXN1	9.23e-84	0.515664	0.423	0.116	1.79e-79	0	NRXN1	corneal endothelium
FKBP10	1.95e-75	0.515499	0.875	0.417	3.79e-71	0	FKBP10	corneal endothelium
FGF18	1.91e-117	0.513769	0.362	0.062	3.7e-113	0	FGF18	corneal endothelium
ARHGAP24	4.97e-135	0.50806	0.451	0.086	9.66e-131	0	ARHGAP24	corneal endothelium
TFAP2A	2.07e-113	0.508042	0.367	0.067	4.03e-109	0	TFAP2A	corneal endothelium
NDUFS4	1.65e-73	0.505807	0.887	0.476	3.21e-69	0	NDUFS4	corneal endothelium
NDN	6.5e-68	0.505152	0.896	0.454	1.26e-63	0	NDN	corneal endothelium
DNAJB4	2.02e-79	0.50378	0.621	0.241	3.93e-75	0	DNAJB4	corneal endothelium
PID1	1.13e-211	0.503139	0.411	0.035	2.19e-207	0	PID1	corneal endothelium
C1QTNF4	3.25e-76	0.502239	0.773	0.363	6.31e-72	0	C1QTNF4	corneal endothelium
SH3BP5	2.8e-100	0.500923	0.668	0.24	5.43e-96	0	SH3BP5	corneal endothelium
RPS15A	1.57e-79	0.500364	1	0.985	3.05e-75	0	RPS15A	corneal endothelium
PENK	1.11e-193	2.36238	0.718	0.172	2.16e-189	1	PENK	NC
OGN	1.49e-164	1.67679	0.877	0.322	2.89e-160	1	OGN	NC
CTGF	1.04e-116	1.48883	0.897	0.418	2.02e-112	1	CTGF	NC
TM4SF1	4.22e-142	1.35999	0.744	0.222	8.19e-138	1	TM4SF1	NC
PCOLCE	6.24e-178	1.35236	0.986	0.414	1.21e-173	1	PCOLCE	NC
PITX1	6.21e-171	1.28045	0.926	0.325	1.21e-166	1	PITX1	NC
HSPA51	6.62e-125	1.27119	0.994	0.7	1.28e-120	1	HSPA5	NC
ID3	1.83e-113	1.23555	0.986	0.653	3.56e-109	1	ID3	NC
TSC22D1	7.54e-129	1.21901	0.968	0.612	1.46e-124	1	TSC22D1	NC
CYR61	2.58e-113	1.21367	0.907	0.41	5e-109	1	CYR61	NC
IGFBP51	3.5e-118	1.19819	0.962	0.502	6.79e-114	1	IGFBP5	NC
SOCS31	5.25e-127	1.18766	0.952	0.429	1.02e-122	1	SOCS3	NC
PRSS23	1.46e-155	1.16141	0.811	0.26	2.83e-151	1	PRSS23	NC
FOXC2	1.56e-191	1.15844	0.825	0.222	3.03e-187	1	FOXC2	NC
CDC42EP5	8.23e-163	1.1458	0.94	0.376	1.6e-158	1	CDC42EP5	NC
IL11RA1	1.05e-142	1.13163	0.94	0.408	2.04e-138	1	IL11RA	NC
EGFL61	4.47e-145	1.12539	0.883	0.315	8.68e-141	1	EGFL6	NC
GMDS	1.07e-183	1.12159	0.913	0.282	2.07e-179	1	GMDS	NC
RAMP2	5.09e-143	1.08945	0.917	0.37	9.88e-139	1	RAMP2	NC
FOXC1	1.03e-176	1.08683	0.926	0.309	2e-172	1	FOXC1	NC
JUNB1	1.75e-102	1.07746	0.978	0.593	3.4e-98	1	JUNB	NC
NDNF	5e-206	1.06975	0.839	0.201	9.7e-202	1	NDNF	NC
CALD1	3.54e-126	1.03164	0.976	0.512	6.88e-122	1	CALD1	NC
PRSS35	6.01e-124	1.02125	0.771	0.266	1.17e-119	1	PRSS35	NC
ACTG1	3.34e-164	1.00055	1	0.974	6.48e-160	1	ACTG1	NC
BAMBI	2.89e-121	0.994732	0.773	0.27	5.62e-117	1	BAMBI	NC
FOS1	3.86e-94	0.98572	0.994	0.682	7.5e-90	1	FOS	NC
ZFP361	5.85e-114	0.979904	0.893	0.354	1.14e-109	1	ZFP36	NC
DUSP1	6.11e-78	0.948597	0.942	0.538	1.19e-73	1	DUSP1	NC
CEBPD	1.44e-106	0.948394	0.742	0.265	2.79e-102	1	CEBPD	NC
IER3	9.22e-87	0.946408	0.646	0.238	1.79e-82	1	IER3	NC
GADD45B	2.94e-131	0.932694	0.907	0.387	5.72e-127	1	GADD45B	NC
NRP2	1.85e-139	0.930644	0.845	0.298	3.59e-135	1	NRP2	NC
MTCH1	1.07e-84	0.928027	0.968	0.644	2.07e-80	1	MTCH1	NC
PITX2	1.03e-118	0.927291	0.895	0.339	2e-114	1	PITX2	NC
CYTL1	1.5e-77	0.912682	0.489	0.153	2.92e-73	1	CYTL1	NC
MEST	5.55e-103	0.900676	0.96	0.514	1.08e-98	1	MEST	NC
TAGLN	3.35e-115	0.883714	0.551	0.144	6.51e-111	1	TAGLN	NC
EDN3	3.34e-147	0.876202	0.761	0.214	6.48e-143	1	EDN3	NC
SIX2	1.44e-152	0.861101	0.658	0.159	2.81e-148	1	SIX2	NC
H3F3B	1.26e-100	0.855533	1	0.959	2.44e-96	1	H3F3B	NC
LMO4	5.27e-89	0.85448	0.922	0.512	1.02e-84	1	LMO4	NC
COL8A2	3.77e-152	0.842488	0.753	0.213	7.31e-148	1	COL8A2	NC
COL1A21	1.61e-91	0.841225	0.998	0.686	3.12e-87	1	COL1A2	NC
ID1	7.39e-74	0.834812	0.883	0.495	1.44e-69	1	ID1	NC
PTN	2.59e-71	0.827915	0.849	0.403	5.02e-67	1	PTN	NC
S100A111	1.17e-83	0.820928	0.98	0.517	2.27e-79	1	S100A11	NC
FBLN51	4.67e-92	0.818044	0.734	0.292	9.08e-88	1	FBLN5	NC
TMSB4X	1.21e-94	0.810009	1	0.919	2.36e-90	1	TMSB4X	NC
TPM1	1.59e-90	0.796025	0.946	0.51	3.08e-86	1	TPM1	NC
SDC2	1.59e-111	0.792746	0.859	0.351	3.08e-107	1	SDC2	NC
MXRA8	9.06e-109	0.790236	0.905	0.389	1.76e-104	1	MXRA8	NC
IER2	4.2e-70	0.788016	0.958	0.567	8.16e-66	1	IER2	NC
MYL9	3.7e-110	0.784756	0.757	0.282	7.19e-106	1	MYL9	NC
CDH11	1.89e-115	0.783772	0.905	0.371	3.68e-111	1	CDH11	NC
DSTN	1.72e-86	0.782794	0.974	0.662	3.33e-82	1	DSTN	NC
FOXP11	5.42e-92	0.782489	0.934	0.461	1.05e-87	1	FOXP1	NC
SULT1E11	6.98e-68	0.777645	0.674	0.27	1.36e-63	1	SULT1E1	NC
MFAP41	8.26e-100	0.774333	0.946	0.398	1.6e-95	1	MFAP4	NC
2001-06-01	1.81e-75	0.77432	0.984	0.683	3.51e-71	1	JUN	NC
OLFML31	4.83e-104	0.76944	0.853	0.342	9.38e-100	1	OLFML3	NC
PRRX2	6.31e-112	0.759266	0.847	0.313	1.22e-107	1	PRRX2	NC
CTSK1	1.26e-114	0.754427	0.893	0.351	2.45e-110	1	CTSK	NC
HIST1H2AC	1.33e-62	0.753342	0.75	0.375	2.58e-58	1	HIST1H2AC	NC
FN1	8.46e-92	0.750064	0.873	0.401	1.64e-87	1	FN1	NC
LGALS11	1.38e-65	0.748938	0.996	0.75	2.69e-61	1	LGALS1	NC
MAGED21	2.21e-75	0.74605	0.984	0.664	4.28e-71	1	MAGED2	NC
COL3A11	1.08e-84	0.740971	0.998	0.628	2.1e-80	1	COL3A1	NC
NPM1	2.49e-104	0.739549	0.994	0.909	4.84e-100	1	NPM1	NC
TIMP1	3.32e-88	0.739373	0.948	0.485	6.45e-84	1	TIMP1	NC
RAB34	1.21e-94	0.736085	0.905	0.437	2.36e-90	1	RAB34	NC
COL1A11	3.03e-91	0.735407	0.992	0.648	5.89e-87	1	COL1A1	NC
KCNQ1OT11	2.61e-72	0.72829	0.962	0.524	5.07e-68	1	KCNQ1OT1	NC
APP	3.23e-86	0.726773	0.972	0.547	6.27e-82	1	APP	NC
CXCL12	2.33e-90	0.723207	0.702	0.252	4.52e-86	1	CXCL12	NC
COL12A1	2.46e-116	0.722623	0.753	0.258	4.78e-112	1	COL12A1	NC
OSTC	8.84e-80	0.713973	0.976	0.64	1.72e-75	1	OSTC	NC
COL9A3	2.77e-101	0.709186	0.66	0.218	5.38e-97	1	COL9A3	NC
IFITM3	1.21e-88	0.707021	0.96	0.467	2.35e-84	1	IFITM3	NC
MIR99AHG	5.32e-94	0.70402	0.857	0.366	1.03e-89	1	MIR99AHG	NC
ITGB1	3.71e-78	0.701458	0.934	0.517	7.21e-74	1	ITGB1	NC
HNRNPA1	1.53e-96	0.700034	1	0.912	2.98e-92	1	HNRNPA1	NC
EFEMP2	2.19e-94	0.692807	0.831	0.362	4.25e-90	1	EFEMP2	NC
MDFI	1.08e-98	0.691233	0.843	0.349	2.1e-94	1	MDFI	NC
BGN	6.63e-114	0.687889	0.753	0.256	1.29e-109	1	BGN	NC
LITAF	1.26e-108	0.68715	0.825	0.316	2.44e-104	1	LITAF	NC
NR3C1	1e-99	0.68137	0.746	0.28	1.95e-95	1	NR3C1	NC
HERPUD1	7.25e-66	0.674064	0.849	0.455	1.41e-61	1	HERPUD1	NC
RPL10A1	2.55e-89	0.668361	0.998	0.952	4.95e-85	1	RPL10A	NC
CPED1	1.31e-105	0.668062	0.823	0.311	2.54e-101	1	CPED1	NC
CAVIN1	2.46e-97	0.666561	0.706	0.252	4.77e-93	1	CAVIN1	NC
APOE	8.46e-89	0.663878	0.885	0.42	1.64e-84	1	APOE	NC
SERPINE2	8.71e-83	0.662844	0.751	0.305	1.69e-78	1	SERPINE2	NC
LY6E1	3.2e-79	0.655121	0.909	0.42	6.21e-75	1	LY6E	NC
MEG31	2.34e-68	0.654497	0.97	0.497	4.54e-64	1	MEG3	NC
CNN3	1.09e-66	0.653988	0.974	0.623	2.12e-62	1	CNN3	NC
SOSTDC1	3.61e-63	0.653644	0.543	0.201	7.01e-59	1	SOSTDC1	NC
CIRBP	6.26e-81	0.650451	0.99	0.852	1.22e-76	1	CIRBP	NC
RRBP11	3.03e-94	0.649685	0.859	0.362	5.88e-90	1	RRBP1	NC
RPL15	1.53e-113	0.648305	0.998	0.985	2.97e-109	1	RPL15	NC
PIEZO2	1.43e-106	0.637983	0.662	0.206	2.78e-102	1	PIEZO2	NC
LAPTM4A1	9.55e-60	0.63448	0.992	0.64	1.85e-55	1	LAPTM4A	NC
RPS81	5.55e-96	0.630838	0.998	0.993	1.08e-91	1	RPS8	NC
RPL10	1.3e-104	0.626277	1	0.997	2.53e-100	1	RPL10	NC
CRTAP	4.21e-89	0.624877	0.779	0.333	8.18e-85	1	CRTAP	NC
CALU	1.04e-70	0.622923	0.928	0.502	2.03e-66	1	CALU	NC
SNHG7	3.11e-73	0.617522	0.932	0.512	6.04e-69	1	SNHG7	NC
C2orf401	1.59e-78	0.613856	0.722	0.294	3.08e-74	1	C2orf40	NC
EGR11	4.69e-66	0.611032	0.922	0.464	9.11e-62	1	EGR1	NC
FIBIN	1e-85	0.609782	0.638	0.219	1.95e-81	1	FIBIN	NC
SSR2	4.84e-64	0.606651	0.984	0.694	9.41e-60	1	SSR2	NC
SHISA2	1.94e-105	0.60612	0.584	0.161	3.78e-101	1	SHISA2	NC
EVA1B	5.16e-88	0.606041	0.875	0.38	1e-83	1	EVA1B	NC
FGFR2	4.85e-95	0.604433	0.614	0.198	9.41e-91	1	FGFR2	NC
TPBG1	1.78e-90	0.597844	0.795	0.324	3.45e-86	1	TPBG	NC
ATP5MC2	2.16e-64	0.596525	0.984	0.766	4.19e-60	1	ATP5MC2	NC
PFN2	1.57e-77	0.595344	0.881	0.435	3.05e-73	1	PFN2	NC
MFAP21	1.95e-76	0.592863	0.873	0.407	3.79e-72	1	MFAP2	NC
HNRNPA1P48	6.25e-76	0.592322	0.865	0.426	1.21e-71	1	HNRNPA1P48	NC
CNN2	5.97e-92	0.591927	0.763	0.305	1.16e-87	1	CNN2	NC
RARB	1.78e-96	0.590786	0.594	0.183	3.47e-92	1	RARB	NC
MAFF	1.23e-69	0.589865	0.608	0.225	2.38e-65	1	MAFF	NC
RPS261	7.92e-78	0.587969	0.996	0.938	1.54e-73	1	RPS26	NC
SNHG81	5.05e-54	0.586553	0.93	0.563	9.81e-50	1	SNHG8	NC
RPL5	3.82e-82	0.585087	1	0.986	7.42e-78	1	RPL5	NC
LTBP1	7.06e-78	0.58314	0.688	0.285	1.37e-73	1	LTBP1	NC
BEX3	6.68e-58	0.582894	0.982	0.727	1.3e-53	1	BEX3	NC
GLT8D21	1.31e-95	0.582446	0.819	0.314	2.54e-91	1	GLT8D2	NC
COL4A2	9.2e-86	0.582197	0.807	0.359	1.79e-81	1	COL4A2	NC
STAT3	9.09e-70	0.581368	0.819	0.387	1.76e-65	1	STAT3	NC
CLMP	1.29e-95	0.580865	0.708	0.253	2.51e-91	1	CLMP	NC
RPS4X	2.43e-78	0.580424	1	0.989	4.72e-74	1	RPS4X	NC
TCEAL9	6.4e-66	0.579601	0.938	0.523	1.24e-61	1	TCEAL9	NC
FKBP101	4.36e-75	0.578491	0.887	0.425	8.47e-71	1	FKBP10	NC
FCGRT1	9.54e-78	0.574487	0.881	0.391	1.85e-73	1	FCGRT	NC
COL11A1	2.48e-101	0.573364	0.696	0.243	4.82e-97	1	COL11A1	NC
CTSC	5.03e-67	0.571946	0.718	0.296	9.77e-63	1	CTSC	NC
NR4A1	7.38e-48	0.569118	0.549	0.242	1.43e-43	1	NR4A1	NC
SPARC1	3.45e-62	0.568433	0.978	0.608	6.7e-58	1	SPARC	NC
NFKBIZ	2.51e-79	0.567623	0.672	0.252	4.87e-75	1	NFKBIZ	NC
FBN2	2.71e-85	0.56654	0.849	0.374	5.27e-81	1	FBN2	NC
SNHG18	4.54e-85	0.56592	0.777	0.324	8.82e-81	1	SNHG18	NC
ANXA21	4.02e-52	0.560672	0.976	0.614	7.8e-48	1	ANXA2	NC
SERPINH1	3.73e-70	0.559248	0.851	0.416	7.24e-66	1	SERPINH1	NC
PLD3	1.57e-66	0.556939	0.958	0.576	3.05e-62	1	PLD3	NC
XBP1	1.33e-69	0.554399	0.793	0.368	2.59e-65	1	XBP1	NC
MDK1	6.84e-44	0.552088	0.99	0.765	1.33e-39	1	MDK	NC
EMCN	8.67e-69	0.55017	0.469	0.145	1.68e-64	1	EMCN	NC
ZFP36L2	7.69e-44	0.550043	0.954	0.606	1.49e-39	1	ZFP36L2	NC
MARCKS1	4.73e-42	0.548072	0.986	0.741	9.19e-38	1	MARCKS	NC
EMILIN1	2.73e-89	0.54802	0.889	0.364	5.3e-85	1	EMILIN1	NC
AIG1	5.66e-86	0.547192	0.686	0.265	1.1e-81	1	AIG1	NC
EPHA3	2.49e-81	0.546437	0.453	0.123	4.84e-77	1	EPHA3	NC
LAMA4	1.65e-65	0.546041	0.686	0.282	3.2e-61	1	LAMA4	NC
RPL39	9e-82	0.543226	1	0.978	1.75e-77	1	RPL39	NC
NDN1	7.51e-67	0.542412	0.913	0.462	1.46e-62	1	NDN	NC
VCAN	9.7e-62	0.542131	0.869	0.422	1.88e-57	1	VCAN	NC
EIF3E1	5.86e-49	0.541211	0.98	0.721	1.14e-44	1	EIF3E	NC
NME4	8.64e-69	0.540779	0.895	0.446	1.68e-64	1	NME4	NC
RPS12	8.86e-96	0.540711	1	0.991	1.72e-91	1	RPS12	NC
NREP	4.45e-46	0.538991	0.972	0.604	8.65e-42	1	NREP	NC
THBS1	2.22e-84	0.53383	0.537	0.168	4.31e-80	1	THBS1	NC
RPL341	3.95e-66	0.531245	1	0.985	7.67e-62	1	RPL34	NC
AAMDC	7.69e-70	0.529195	0.819	0.404	1.49e-65	1	AAMDC	NC
TGFB1I1	2e-84	0.527961	0.672	0.251	3.89e-80	1	TGFB1I1	NC
TUSC3	4.32e-62	0.524215	0.879	0.43	8.39e-58	1	TUSC3	NC
RPL28	2.36e-74	0.523754	1	0.98	4.58e-70	1	RPL28	NC
RPS14	1.56e-78	0.522406	0.998	0.991	3.02e-74	1	RPS14	NC
RPL91	4.7e-66	0.522085	1	0.98	9.13e-62	1	RPL9	NC
CALR	3.8e-37	0.521047	0.974	0.726	7.38e-33	1	CALR	NC
RPL3	9.69e-76	0.51859	0.998	0.989	1.88e-71	1	RPL3	NC
RPL35A	1.9e-72	0.517958	1	0.985	3.69e-68	1	RPL35A	NC
RPS27A	2.05e-82	0.514758	0.998	0.992	3.98e-78	1	RPS27A	NC
GPX8	2.51e-70	0.514565	0.787	0.348	4.88e-66	1	GPX8	NC
GEM	1.34e-65	0.513274	0.487	0.163	2.6e-61	1	GEM	NC
EIF3F	8.18e-51	0.513159	0.976	0.756	1.59e-46	1	EIF3F	NC
RPS2	2.97e-80	0.510743	1	0.99	5.77e-76	1	RPS2	NC
EEF1A1	1.05e-71	0.510274	1	1	2.04e-67	1	EEF1A1	NC
BOC	1.2e-77	0.507935	0.648	0.246	2.33e-73	1	BOC	NC
NNAT	1.34e-52	0.507317	0.775	0.385	2.59e-48	1	NNAT	NC
HES1	1.27e-77	0.506754	0.851	0.369	2.47e-73	1	HES1	NC
2006-09-01	1.3e-64	0.505126	0.704	0.321	2.53e-60	1	2006-09-01	NC
RPS9	5.56e-65	0.502354	1	0.962	1.08e-60	1	RPS9	NC
RPL7A	2.48e-69	0.500854	1	0.988	4.81e-65	1	RPL7A	NC
CXCL14	0.00945551	2.19269	0.154	0.127	1	2	CXCL14	periocular mesenchyme
COL5A11	8.79e-17	1.53346	0.489	0.418	1.71e-12	2	COL5A1	periocular mesenchyme
COL1A12	2.82e-30	1.50821	0.833	0.669	5.48e-26	2	COL1A1	periocular mesenchyme
COL3A12	1.03e-21	1.45323	0.793	0.654	1.99e-17	2	COL3A1	periocular mesenchyme
COL5A21	1.75e-07	1.34309	0.421	0.412	0.00340605	2	COL5A2	periocular mesenchyme
COL1A22	8.13e-27	1.2558	0.846	0.705	1.58e-22	2	COL1A2	periocular mesenchyme
LUM1	0.000287444	1.22338	0.476	0.473	1	2	LUM	periocular mesenchyme
POSTN1	0.00217222	1.19902	0.28	0.251	1	2	POSTN	periocular mesenchyme
IGFBP2	1.73e-15	1.15853	0.564	0.549	3.36e-11	2	IGFBP2	periocular mesenchyme
DCN1	4.1e-24	1.14505	0.694	0.544	7.96e-20	2	DCN	periocular mesenchyme
FN11	0.00261447	1.1157	0.41	0.456	1	2	FN1	periocular mesenchyme
SPARC2	2.65e-21	1.07777	0.736	0.638	5.16e-17	2	SPARC	periocular mesenchyme
COL6A21	1.44e-12	1.01074	0.628	0.562	2.8e-08	2	COL6A2	periocular mesenchyme
FSTL11	2.07e-05	1.01048	0.489	0.522	0.402599	2	FSTL1	periocular mesenchyme
MGP1	4.86e-10	0.9997	0.502	0.429	9.43e-06	2	MGP	periocular mesenchyme
COL6A11	1.01e-05	0.928001	0.498	0.552	0.196219	2	COL6A1	periocular mesenchyme
MT-ND51	4.65e-09	0.905219	0.674	0.755	9.03e-05	2	MT-ND5	periocular mesenchyme
MT-CYB	1.57e-19	0.904156	0.914	0.932	3.04e-15	2	MT-CYB	periocular mesenchyme
MT-ND3	7.24e-20	0.901258	0.925	0.928	1.41e-15	2	MT-ND3	periocular mesenchyme
MT-ATP6	2.23e-19	0.865987	0.956	0.965	4.34e-15	2	MT-ATP6	periocular mesenchyme
MT-ND1	1.39e-07	0.825642	0.817	0.884	0.00269825	2	MT-ND1	periocular mesenchyme
OGN1	0.00701759	0.822585	0.394	0.38	1	2	OGN	periocular mesenchyme
MT-ND4	1.93e-13	0.801883	0.879	0.932	3.75e-09	2	MT-ND4	periocular mesenchyme
APP1	0.00661178	0.777748	0.535	0.598	1	2	APP	periocular mesenchyme
MT-CO1	1.06e-12	0.76221	0.934	0.949	2.05e-08	2	MT-CO1	periocular mesenchyme
MT-CO3	1.71e-14	0.756792	0.967	0.975	3.32e-10	2	MT-CO3	periocular mesenchyme
MT-ND2	3.86e-06	0.728909	0.696	0.804	0.0749343	2	MT-ND2	periocular mesenchyme
S100A112	8.3e-07	0.668384	0.606	0.562	0.0161101	2	S100A11	periocular mesenchyme
FBLN11	0.00255995	0.636693	0.568	0.588	1	2	FBLN1	periocular mesenchyme
TAGLN1	0.000391759	0.630335	0.115	0.195	1	2	TAGLN	periocular mesenchyme
PXDN	0.00293376	0.614332	0.253	0.39	1	2	PXDN	periocular mesenchyme
ALCAM	0.00849241	0.608197	0.189	0.289	1	2	ALCAM	periocular mesenchyme
BCAM	0.00186199	0.602313	0.143	0.23	1	2	BCAM	periocular mesenchyme
COL9A31	0.00184635	0.592821	0.17	0.276	1	2	COL9A3	periocular mesenchyme
LTBP3	0.000202412	0.547488	0.233	0.383	1	2	LTBP3	periocular mesenchyme
COL8A21	0.000778184	0.540465	0.17	0.281	1	2	COL8A2	periocular mesenchyme
GLG1	0.00446011	0.537033	0.269	0.419	1	2	GLG1	periocular mesenchyme
ROBO1	0.00161207	0.534688	0.205	0.328	1	2	ROBO1	periocular mesenchyme
AIF1	0.00347948	0.524514	0.057	0.105	1	2	AIF1	periocular mesenchyme
LAMB2	0.00297285	0.517047	0.159	0.251	1	2	LAMB2	periocular mesenchyme
LUM2	6.08e-127	2.0601	0.976	0.435	1.18e-122	3	LUM	cornea stroma
OGN2	1.95e-117	1.81459	0.877	0.344	3.79e-113	3	OGN	cornea stroma
TM4SF11	7.54e-114	1.7409	0.756	0.241	1.46e-109	3	TM4SF1	cornea stroma
COL1A13	1.28e-123	1.69463	0.994	0.662	2.49e-119	3	COL1A1	cornea stroma
ASPN	1.57e-179	1.65509	0.527	0.062	3.04e-175	3	ASPN	cornea stroma
COL1A23	1.6e-108	1.45105	1	0.698	3.11e-104	3	COL1A2	cornea stroma
MGP2	1.24e-73	1.3928	0.831	0.406	2.41e-69	3	MGP	cornea stroma
PRSS351	2.34e-95	1.35605	0.774	0.285	4.55e-91	3	PRSS35	cornea stroma
PTN1	5.63e-57	1.31661	0.81	0.423	1.09e-52	3	PTN	cornea stroma
CTHRC11	1.04e-108	1.3125	0.931	0.366	2.03e-104	3	CTHRC1	cornea stroma
DCN2	3.11e-93	1.31122	0.973	0.527	6.03e-89	3	DCN	cornea stroma
VIM1	2.57e-98	1.27103	1	0.943	4.99e-94	3	VIM	cornea stroma
EGFL62	3.36e-68	1.13814	0.804	0.343	6.53e-64	3	EGFL6	cornea stroma
ITM2A1	5.36e-67	1.13368	0.901	0.434	1.04e-62	3	ITM2A	cornea stroma
FIBIN1	1.13e-110	1.11155	0.756	0.226	2.19e-106	3	FIBIN	cornea stroma
COL12A11	3.03e-86	1.10935	0.777	0.275	5.88e-82	3	COL12A1	cornea stroma
PITX21	1.27e-90	1.10198	0.883	0.362	2.46e-86	3	PITX2	cornea stroma
LGALS12	3.86e-79	1.09891	0.994	0.76	7.5e-75	3	LGALS1	cornea stroma
GAS2	3.52e-112	1.09731	0.696	0.197	6.83e-108	3	GAS2	cornea stroma
COL6A22	1.28e-80	1.09006	0.985	0.537	2.49e-76	3	COL6A2	cornea stroma
NRP21	5.39e-76	1.05657	0.78	0.324	1.05e-71	3	NRP2	cornea stroma
CNN31	1.9e-73	1.02143	0.958	0.638	3.69e-69	3	CNN3	cornea stroma
SPARC3	6.84e-74	1.02045	0.994	0.621	1.33e-69	3	SPARC	cornea stroma
OLFML32	2.66e-94	1.00039	0.889	0.359	5.16e-90	3	OLFML3	cornea stroma
IL11RA2	3.95e-81	0.998362	0.94	0.429	7.67e-77	3	IL11RA	cornea stroma
COL3A13	8e-61	0.976699	0.997	0.643	1.55e-56	3	COL3A1	cornea stroma
C2orf402	3.88e-71	0.975746	0.753	0.308	7.54e-67	3	C2orf40	cornea stroma
CRABP21	3.67e-75	0.966187	0.961	0.488	7.12e-71	3	CRABP2	cornea stroma
FOS2	4.41e-45	0.964763	0.97	0.696	8.56e-41	3	FOS	cornea stroma
POSTN2	3.67e-21	0.957529	0.473	0.237	7.12e-17	3	POSTN	cornea stroma
FBLN52	7.11e-83	0.927972	0.807	0.304	1.38e-78	3	FBLN5	cornea stroma
PCOLCE1	6.24e-71	0.925671	0.955	0.439	1.21e-66	3	PCOLCE	cornea stroma
COL5A22	1.46e-80	0.913024	0.886	0.377	2.83e-76	3	COL5A2	cornea stroma
FBLN12	4.91e-72	0.903138	0.973	0.557	9.53e-68	3	FBLN1	cornea stroma
TWIST21	1.67e-45	0.902768	0.587	0.252	3.24e-41	3	TWIST2	cornea stroma
CDC42EP51	4.03e-78	0.889872	0.91	0.4	7.82e-74	3	CDC42EP5	cornea stroma
MMP21	1.37e-92	0.881367	0.913	0.368	2.66e-88	3	MMP2	cornea stroma
RERG	1.95e-101	0.863971	0.611	0.153	3.78e-97	3	RERG	cornea stroma
IGFBP21	3.78e-62	0.861191	0.934	0.522	7.34e-58	3	IGFBP2	cornea stroma
BOC1	7.46e-92	0.849118	0.747	0.254	1.45e-87	3	BOC	cornea stroma
GAS11	7.89e-76	0.842795	0.837	0.339	1.53e-71	3	GAS1	cornea stroma
IGFBP41	1.62e-76	0.841712	0.907	0.423	3.14e-72	3	IGFBP4	cornea stroma
MFAP42	7.99e-68	0.838132	0.949	0.419	1.55e-63	3	MFAP4	cornea stroma
GLT8D22	2.28e-77	0.828326	0.819	0.334	4.43e-73	3	GLT8D2	cornea stroma
LTBP11	1.05e-72	0.817508	0.747	0.296	2.03e-68	3	LTBP1	cornea stroma
FN12	1.82e-58	0.813316	0.898	0.417	3.54e-54	3	FN1	cornea stroma
FOSB1	4.78e-32	0.81122	0.711	0.394	9.28e-28	3	FOSB	cornea stroma
PMP221	4.74e-64	0.809574	0.91	0.411	9.21e-60	3	PMP22	cornea stroma
HSPA52	5.72e-40	0.785541	0.976	0.713	1.11e-35	3	HSPA5	cornea stroma
LRRC171	2.24e-61	0.783448	0.705	0.293	4.35e-57	3	LRRC17	cornea stroma
MDK2	1.6e-56	0.783443	0.994	0.774	3.12e-52	3	MDK	cornea stroma
ITM2C1	1.96e-49	0.776369	0.958	0.555	3.8e-45	3	ITM2C	cornea stroma
FCGRT2	9.71e-75	0.776297	0.898	0.409	1.88e-70	3	FCGRT	cornea stroma
COL6A31	8.06e-83	0.76577	0.768	0.281	1.57e-78	3	COL6A3	cornea stroma
LAPTM4A2	4.03e-50	0.764907	0.991	0.654	7.83e-46	3	LAPTM4A	cornea stroma
CALU1	5.24e-59	0.763384	0.952	0.517	1.02e-54	3	CALU	cornea stroma
TWIST11	2.11e-39	0.758167	0.633	0.287	4.09e-35	3	TWIST1	cornea stroma
LY6E2	1.47e-61	0.750973	0.922	0.438	2.85e-57	3	LY6E	cornea stroma
CTSK2	9.75e-63	0.738557	0.843	0.376	1.89e-58	3	CTSK	cornea stroma
COL5A12	1.27e-72	0.734084	0.883	0.39	2.47e-68	3	COL5A1	cornea stroma
THBS41	7.78e-24	0.731309	0.265	0.092	1.51e-19	3	THBS4	cornea stroma
BMP3	2.11e-66	0.729854	0.395	0.092	4.1e-62	3	BMP3	cornea stroma
SCX	2.53e-80	0.729644	0.452	0.1	4.92e-76	3	SCX	cornea stroma
COL11A11	1.55e-55	0.726532	0.651	0.264	3.01e-51	3	COL11A1	cornea stroma
COL6A12	9.41e-58	0.723773	0.955	0.516	1.83e-53	3	COL6A1	cornea stroma
RRBP12	9.87e-58	0.721323	0.825	0.384	1.92e-53	3	RRBP1	cornea stroma
1961-09-01	2.3e-64	0.706319	0.762	0.332	4.46e-60	3	2006-09-01	cornea stroma
CPED11	2.88e-62	0.703696	0.801	0.333	5.59e-58	3	CPED1	cornea stroma
OSTC1	1.84e-48	0.701452	0.979	0.653	3.57e-44	3	OSTC	cornea stroma
MDFI1	2.63e-62	0.700751	0.825	0.37	5.11e-58	3	MDFI	cornea stroma
ACTG11	2.89e-60	0.691839	0.997	0.975	5.61e-56	3	ACTG1	cornea stroma
CDH111	4.51e-60	0.689785	0.864	0.395	8.76e-56	3	CDH11	cornea stroma
S100A113	7.23e-46	0.686676	0.955	0.537	1.4e-41	3	S100A11	cornea stroma
TSC22D11	3.79e-38	0.686032	0.934	0.628	7.35e-34	3	TSC22D1	cornea stroma
PRRX21	7.08e-66	0.682654	0.819	0.336	1.37e-61	3	PRRX2	cornea stroma
ANXA51	1.81e-46	0.680635	0.934	0.567	3.51e-42	3	ANXA5	cornea stroma
MFAP22	3.85e-57	0.678571	0.889	0.424	7.48e-53	3	MFAP2	cornea stroma
SIX21	1.54e-60	0.672228	0.557	0.186	3e-56	3	SIX2	cornea stroma
EFEMP21	7.99e-63	0.67163	0.843	0.379	1.55e-58	3	EFEMP2	cornea stroma
APP2	1.94e-46	0.671177	0.97	0.563	3.77e-42	3	APP	cornea stroma
ALCAM1	2.19e-42	0.66711	0.596	0.255	4.25e-38	3	ALCAM	cornea stroma
FKBP102	3.42e-53	0.666797	0.873	0.444	6.65e-49	3	FKBP10	cornea stroma
EMX2	1.36e-52	0.654923	0.515	0.183	2.63e-48	3	EMX2	cornea stroma
MEG32	1.52e-44	0.650501	0.949	0.517	2.96e-40	3	MEG3	cornea stroma
HIST1H2AC1	4.11e-37	0.650119	0.729	0.391	7.97e-33	3	HIST1H2AC	cornea stroma
2002-06-01	3.27e-32	0.649333	0.967	0.696	6.35e-28	3	JUN	cornea stroma
EMILIN11	1.83e-58	0.648366	0.852	0.387	3.56e-54	3	EMILIN1	cornea stroma
MEST1	3.14e-42	0.647311	0.943	0.533	6.1e-38	3	MEST	cornea stroma
TPBG2	5.05e-47	0.641152	0.75	0.346	9.81e-43	3	TPBG	cornea stroma
TIMP11	1.48e-48	0.64044	0.919	0.505	2.87e-44	3	TIMP1	cornea stroma
FABP5	1.37e-37	0.632399	0.952	0.694	2.66e-33	3	FABP5	cornea stroma
LMNA1	1.46e-38	0.6303	0.726	0.378	2.84e-34	3	LMNA	cornea stroma
SSR21	1.26e-44	0.62894	0.982	0.705	2.46e-40	3	SSR2	cornea stroma
SNHG82	6.11e-43	0.628686	0.94	0.577	1.19e-38	3	SNHG8	cornea stroma
PPIC1	1.67e-56	0.625561	0.711	0.293	3.25e-52	3	PPIC	cornea stroma
ANXA22	2.06e-32	0.623347	0.964	0.629	4.01e-28	3	ANXA2	cornea stroma
MARCKS2	3.73e-35	0.610025	0.985	0.75	7.25e-31	3	MARCKS	cornea stroma
THBS11	1.5e-53	0.606016	0.527	0.183	2.91e-49	3	THBS1	cornea stroma
MXRA51	2.48e-40	0.605338	0.59	0.257	4.81e-36	3	MXRA5	cornea stroma
VCAN1	1.27e-41	0.60411	0.855	0.441	2.46e-37	3	VCAN	cornea stroma
FSTL12	4.15e-42	0.603676	0.88	0.492	8.06e-38	3	FSTL1	cornea stroma
CYTL11	2.55e-13	0.602864	0.337	0.178	4.95e-09	3	CYTL1	cornea stroma
TSPO	1.14e-43	0.602552	0.627	0.282	2.21e-39	3	TSPO	cornea stroma
GPC31	1.77e-37	0.600406	0.711	0.33	3.44e-33	3	GPC3	cornea stroma
KCNQ1OT12	6.5e-40	0.599008	0.943	0.543	1.26e-35	3	KCNQ1OT1	cornea stroma
CHD9	5.05e-47	0.597751	0.904	0.53	9.81e-43	3	CHD9	cornea stroma
PLPP3	4.13e-43	0.59591	0.572	0.243	8.01e-39	3	PLPP3	cornea stroma
LMO41	1.99e-33	0.595702	0.861	0.533	3.87e-29	3	LMO4	cornea stroma
AKAP121	2.11e-39	0.594223	0.759	0.386	4.1e-35	3	AKAP12	cornea stroma
DUSP11	8.96e-24	0.593283	0.858	0.56	1.74e-19	3	DUSP1	cornea stroma
IGFBP52	4.26e-31	0.588778	0.928	0.522	8.28e-27	3	IGFBP5	cornea stroma
MAGED22	4.23e-39	0.588086	0.979	0.677	8.21e-35	3	MAGED2	cornea stroma
RPL101	1.84e-64	0.587459	0.997	0.997	3.57e-60	3	RPL10	cornea stroma
FBN21	1.72e-43	0.57943	0.822	0.395	3.34e-39	3	FBN2	cornea stroma
SERPINH11	6.48e-45	0.578631	0.846	0.433	1.26e-40	3	SERPINH1	cornea stroma
FOXP12	3.72e-39	0.576155	0.873	0.484	7.22e-35	3	FOXP1	cornea stroma
COCH	7.05e-13	0.575633	0.205	0.088	1.37e-08	3	COCH	cornea stroma
ARID5B1	6.81e-53	0.575241	0.687	0.292	1.32e-48	3	ARID5B	cornea stroma
THBS2	1.29e-65	0.57394	0.367	0.079	2.51e-61	3	THBS2	cornea stroma
SEPT111	2.02e-46	0.571148	0.867	0.463	3.93e-42	3	2011-09-01	cornea stroma
CALD11	8.27e-37	0.570853	0.961	0.531	1.61e-32	3	CALD1	cornea stroma
RPS4X1	3.65e-50	0.569768	0.997	0.99	7.08e-46	3	RPS4X	cornea stroma
FMOD	1.88e-61	0.560912	0.545	0.178	3.65e-57	3	FMOD	cornea stroma
SIX1	2.8e-42	0.559482	0.38	0.12	5.43e-38	3	SIX1	cornea stroma
ROBO11	1.42e-60	0.559186	0.711	0.286	2.75e-56	3	ROBO1	cornea stroma
FKBP7	2.44e-52	0.55828	0.717	0.315	4.73e-48	3	FKBP7	cornea stroma
GPX81	5.59e-45	0.556295	0.774	0.367	1.08e-40	3	GPX8	cornea stroma
TCF41	4.13e-46	0.55615	0.955	0.563	8.02e-42	3	TCF4	cornea stroma
PTX3	6.59e-21	0.555312	0.349	0.156	1.28e-16	3	PTX3	cornea stroma
LOX1	1.29e-60	0.553547	0.599	0.208	2.51e-56	3	LOX	cornea stroma
EMP31	3e-39	0.551606	0.91	0.534	5.82e-35	3	EMP3	cornea stroma
ITGB5	1.12e-35	0.547929	0.437	0.172	2.17e-31	3	ITGB5	cornea stroma
SELENOM1	4.23e-46	0.547234	0.756	0.356	8.22e-42	3	SELENOM	cornea stroma
P3H1	3.68e-53	0.54653	0.666	0.277	7.14e-49	3	P3H1	cornea stroma
P4HB	1.59e-38	0.543212	0.946	0.605	3.08e-34	3	P4HB	cornea stroma
PLBD1	5.29e-38	0.54313	0.557	0.247	1.03e-33	3	PLBD1	cornea stroma
CD631	1.37e-39	0.542758	0.991	0.743	2.66e-35	3	CD63	cornea stroma
IGF1	8.45e-54	0.542257	0.328	0.076	1.64e-49	3	IGF1	cornea stroma
COL9A32	2.9e-36	0.541706	0.554	0.244	5.63e-32	3	COL9A3	cornea stroma
SOCS32	5.41e-36	0.539432	0.877	0.455	1.05e-31	3	SOCS3	cornea stroma
MXRA81	1.12e-41	0.53851	0.837	0.415	2.18e-37	3	MXRA8	cornea stroma
PLAT1	1.58e-20	0.531262	0.383	0.178	3.06e-16	3	PLAT	cornea stroma
OLFM2	1.42e-43	0.527715	0.611	0.272	2.77e-39	3	OLFM2	cornea stroma
PYCR1	1.67e-46	0.52718	0.66	0.303	3.25e-42	3	PYCR1	cornea stroma
PPP3CA	1.4e-41	0.526144	0.645	0.31	2.72e-37	3	PPP3CA	cornea stroma
RPS262	9.45e-42	0.524606	0.994	0.94	1.84e-37	3	RPS26	cornea stroma
RAMP21	1.43e-43	0.522528	0.825	0.398	2.78e-39	3	RAMP2	cornea stroma
FGFR11	8.61e-51	0.52243	0.792	0.374	1.67e-46	3	FGFR1	cornea stroma
JUNB2	7.54e-27	0.52084	0.925	0.612	1.46e-22	3	JUNB	cornea stroma
CLMP1	1.11e-44	0.520173	0.639	0.276	2.15e-40	3	CLMP	cornea stroma
H3F3B1	6.93e-34	0.519627	0.994	0.961	1.35e-29	3	H3F3B	cornea stroma
RPL342	1.68e-45	0.518179	1	0.986	3.27e-41	3	RPL34	cornea stroma
CPXM1	4.36e-44	0.518127	0.753	0.37	8.46e-40	3	CPXM1	cornea stroma
CD991	4.38e-37	0.516602	0.889	0.484	8.51e-33	3	CD99	cornea stroma
RGS3	3.64e-37	0.516355	0.557	0.251	7.07e-33	3	RGS3	cornea stroma
EEF1A11	5.69e-49	0.516342	1	1	1.1e-44	3	EEF1A1	cornea stroma
MEOX1	4.73e-51	0.515522	0.349	0.088	9.19e-47	3	MEOX1	cornea stroma
NFIA1	5.8e-41	0.513252	0.714	0.334	1.13e-36	3	NFIA	cornea stroma
PRR16	4.37e-47	0.510847	0.479	0.171	8.48e-43	3	PRR16	cornea stroma
FOXC11	3.11e-38	0.508973	0.738	0.347	6.05e-34	3	FOXC1	cornea stroma
TENT5A	1.62e-37	0.50827	0.44	0.169	3.14e-33	3	TENT5A	cornea stroma
PEG3	3.47e-37	0.507953	0.684	0.334	6.73e-33	3	PEG3	cornea stroma
NDNF1	3.15e-47	0.507091	0.627	0.242	6.12e-43	3	NDNF	cornea stroma
FZD2	6.31e-43	0.5054	0.708	0.333	1.22e-38	3	FZD2	cornea stroma
COL8A22	2.12e-53	0.503189	0.645	0.242	4.11e-49	3	COL8A2	cornea stroma
P3H4	3.23e-41	0.502859	0.642	0.297	6.26e-37	3	P3H4	cornea stroma
RPL151	1.26e-44	0.501276	1	0.985	2.44e-40	3	RPL15	cornea stroma
TFF1	0	4.35653	0.837	0.001	0	4	TFF1	proliferating cones
RCVRN	0	4.35186	0.877	0.004	0	4	RCVRN	proliferating cones
DEK	3.34e-204	3.64278	0.988	0.555	6.49e-200	4	DEK	proliferating cones
HIST1H4C	7.32e-135	3.62552	0.908	0.593	1.42e-130	4	HIST1H4C	proliferating cones
PDE6H	0	3.07952	0.591	0	0	4	PDE6H	proliferating cones
AIPL1	0	2.98268	0.637	0.002	0	4	AIPL1	proliferating cones
HMGA1	1.06e-160	2.80965	0.905	0.448	2.05e-156	4	HMGA1	proliferating cones
HLA-B	8.86e-36	2.76166	0.348	0.134	1.72e-31	4	HLA-B	proliferating cones
GNB3	9.42e-248	2.7565	0.551	0.046	1.83e-243	4	GNB3	proliferating cones
TPH1	0	2.69195	0.535	0.015	0	4	TPH1	proliferating cones
AMER2	5.15e-277	2.56428	0.52	0.031	1e-272	4	AMER2	proliferating cones
HES6	7.59e-150	2.49627	0.582	0.11	1.47e-145	4	HES6	proliferating cones
MCM3	3.6e-90	2.44374	0.575	0.195	6.99e-86	4	MCM3	proliferating cones
CENPF	1.84e-93	2.39694	0.582	0.173	3.57e-89	4	CENPF	proliferating cones
TUBB	3.63e-178	2.37357	1	0.911	7.05e-174	4	TUBB	proliferating cones
GMNN	1.79e-80	2.31821	0.557	0.2	3.48e-76	4	GMNN	proliferating cones
TULP1	4.13e-134	2.31139	0.498	0.086	8.01e-130	4	TULP1	proliferating cones
NEUROD1	0	2.25752	0.455	0.013	0	4	NEUROD1	proliferating cones
HLA-C	9.25e-17	2.25698	0.338	0.204	1.8e-12	4	HLA-C	proliferating cones
TUBB2B	7.41e-151	2.20814	0.957	0.536	1.44e-146	4	TUBB2B	proliferating cones
SSTR2	8.35e-195	2.20601	0.434	0.034	1.62e-190	4	SSTR2	proliferating cones
HLA-DQB1	0	2.17561	0.394	0.001	0	4	HLA-DQB1	proliferating cones
TBCC	4.45e-57	2.15908	0.477	0.188	8.64e-53	4	TBCC	proliferating cones
SOX11	3.35e-75	2.15025	0.729	0.445	6.5e-71	4	SOX11	proliferating cones
MEIS2	6.89e-128	2.15022	0.468	0.076	1.34e-123	4	MEIS2	proliferating cones
RXRG	2.21e-260	2.1029	0.406	0.015	4.29e-256	4	RXRG	proliferating cones
CKB	1.36e-142	2.10053	0.954	0.497	2.63e-138	4	CKB	proliferating cones
KCNV2	0	2.08772	0.382	0	0	4	KCNV2	proliferating cones
PCBP4	2.06e-69	2.08502	0.603	0.272	4e-65	4	PCBP4	proliferating cones
CKAP2	1.03e-75	2.0799	0.446	0.121	2e-71	4	CKAP2	proliferating cones
ATP1B1	1.88e-68	2.06836	0.655	0.357	3.64e-64	4	ATP1B1	proliferating cones
NUDT3	3.84e-56	2.04797	0.474	0.187	7.46e-52	4	NUDT3	proliferating cones
RPS4Y1	0	2.04606	0.348	0.002	0	4	RPS4Y1	proliferating cones
TPRX1	0	2.03308	0.354	0	0	4	TPRX1	proliferating cones
H2AFY	3.27e-54	2.00367	0.671	0.504	6.35e-50	4	H2AFY	proliferating cones
HLA-A	4.65e-13	1.99335	0.44	0.389	9.02e-09	4	HLA-A	proliferating cones
SMC3	2.22e-49	1.98958	0.64	0.456	4.31e-45	4	SMC3	proliferating cones
SIX6	1.44e-103	1.97971	0.505	0.109	2.8e-99	4	SIX6	proliferating cones
UBE2C	1.88e-66	1.94227	0.548	0.195	3.65e-62	4	UBE2C	proliferating cones
OLFM1	9.94e-118	1.90237	0.375	0.049	1.93e-113	4	OLFM1	proliferating cones
FBL	5.34e-33	1.90209	0.557	0.418	1.04e-28	4	FBL	proliferating cones
SCG3	2.74e-146	1.8932	0.363	0.032	5.31e-142	4	SCG3	proliferating cones
CLSPN	3.92e-87	1.8887	0.338	0.056	7.61e-83	4	CLSPN	proliferating cones
CENPV	5.91e-32	1.88041	0.554	0.415	1.15e-27	4	CENPV	proliferating cones
UQCC2	1.41e-24	1.85177	0.502	0.389	2.74e-20	4	UQCC2	proliferating cones
MLLT11	6.79e-46	1.84861	0.603	0.385	1.32e-41	4	MLLT11	proliferating cones
FAM57B	3.53e-143	1.84316	0.366	0.035	6.86e-139	4	FAM57B	proliferating cones
PPP1CC	6.89e-40	1.84309	0.622	0.504	1.34e-35	4	PPP1CC	proliferating cones
STMN1	9.03e-150	1.84173	0.994	0.887	1.75e-145	4	STMN1	proliferating cones
H2AFZ	5.82e-100	1.80344	0.911	0.746	1.13e-95	4	H2AFZ	proliferating cones
HMGB1	6.29e-136	1.79649	0.982	0.876	1.22e-131	4	HMGB1	proliferating cones
KIFC1	7.71e-52	1.74889	0.32	0.083	1.5e-47	4	KIFC1	proliferating cones
PCNA	9.06e-32	1.74728	0.44	0.238	1.76e-27	4	PCNA	proliferating cones
STMN2	3.63e-155	1.74503	0.683	0.134	7.05e-151	4	STMN2	proliferating cones
DCT	1.84e-155	1.73242	0.778	0.193	3.58e-151	4	DCT	proliferating cones
SMC4	8.52e-39	1.7291	0.458	0.218	1.65e-34	4	SMC4	proliferating cones
YWHAQ	7.26e-62	1.72842	0.772	0.704	1.41e-57	4	YWHAQ	proliferating cones
MAP1B	2.25e-66	1.72818	0.732	0.484	4.36e-62	4	MAP1B	proliferating cones
HMGB2	1.87e-73	1.71906	0.828	0.65	3.62e-69	4	HMGB2	proliferating cones
IGDCC3	7.65e-49	1.70296	0.323	0.09	1.49e-44	4	IGDCC3	proliferating cones
ANP32E	1.88e-18	1.70279	0.477	0.393	3.66e-14	4	ANP32E	proliferating cones
MZT1	1.12e-35	1.68915	0.471	0.256	2.18e-31	4	MZT1	proliferating cones
TYMS	8.89e-41	1.68829	0.514	0.263	1.73e-36	4	TYMS	proliferating cones
GNG4	1.86e-93	1.67452	0.323	0.046	3.61e-89	4	GNG4	proliferating cones
CUTA	3.52e-53	1.66862	0.729	0.677	6.83e-49	4	CUTA	proliferating cones
DNMT1	7.23e-22	1.66636	0.366	0.207	1.4e-17	4	DNMT1	proliferating cones
OTX2	5.56e-87	1.64807	0.329	0.05	1.08e-82	4	OTX2	proliferating cones
POLR2J3.1	3.07e-25	1.62665	0.348	0.171	5.97e-21	4	POLR2J3.1	proliferating cones
IGSF21	9.57e-192	1.60521	0.265	0.006	1.86e-187	4	IGSF21	proliferating cones
DDX39A	1.6e-26	1.6049	0.382	0.198	3.1e-22	4	DDX39A	proliferating cones
UBE2T	5.29e-37	1.59886	0.406	0.175	1.03e-32	4	UBE2T	proliferating cones
RPL7L1	2.94e-15	1.59761	0.458	0.401	5.7e-11	4	RPL7L1	proliferating cones
HNRNPAB	6.42e-21	1.59676	0.452	0.326	1.25e-16	4	HNRNPAB	proliferating cones
CDC5L	2.56e-16	1.59235	0.422	0.323	4.97e-12	4	CDC5L	proliferating cones
TOP2A	4.16e-50	1.58352	0.495	0.19	8.08e-46	4	TOP2A	proliferating cones
ATP1A3	4.02e-79	1.55533	0.314	0.051	7.81e-75	4	ATP1A3	proliferating cones
ASRGL1	4.18e-55	1.53446	0.274	0.057	8.11e-51	4	ASRGL1	proliferating cones
SNRPB	6.28e-27	1.53273	0.588	0.53	1.22e-22	4	SNRPB	proliferating cones
PSIP1	1.18e-31	1.52372	0.628	0.577	2.29e-27	4	PSIP1	proliferating cones
DST	5.33e-26	1.51835	0.388	0.2	1.04e-21	4	DST	proliferating cones
GINS2	6.56e-27	1.51224	0.369	0.183	1.27e-22	4	GINS2	proliferating cones
CADPS	1.49e-96	1.50843	0.255	0.025	2.89e-92	4	CADPS	proliferating cones
NEK2	3.9e-35	1.50631	0.252	0.07	7.58e-31	4	NEK2	proliferating cones
PPM1G	8.53e-15	1.50247	0.495	0.479	1.66e-10	4	PPM1G	proliferating cones
UBE2S	1.37e-34	1.50186	0.662	0.561	2.67e-30	4	UBE2S	proliferating cones
AKAP9	3.7e-18	1.49847	0.52	0.478	7.19e-14	4	AKAP9	proliferating cones
DHFR	1.09e-31	1.49239	0.298	0.108	2.11e-27	4	DHFR	proliferating cones
SYNE2	5.29e-22	1.49042	0.452	0.306	1.03e-17	4	SYNE2	proliferating cones
NUSAP1	3.06e-39	1.48425	0.397	0.15	5.95e-35	4	NUSAP1	proliferating cones
ILF2	1.14e-35	1.48166	0.677	0.662	2.22e-31	4	ILF2	proliferating cones
FADS1	8.88e-20	1.47748	0.342	0.189	1.73e-15	4	FADS1	proliferating cones
ENO2	8.1e-30	1.47549	0.326	0.132	1.57e-25	4	ENO2	proliferating cones
NUCKS1	9.4e-44	1.47357	0.729	0.688	1.82e-39	4	NUCKS1	proliferating cones
ODC1	2.46e-41	1.47234	0.692	0.624	4.79e-37	4	ODC1	proliferating cones
SEC11C	1.35e-11	1.46953	0.332	0.236	2.63e-07	4	SEC11C	proliferating cones
CRX	8.17e-149	1.46479	0.222	0.007	1.59e-144	4	CRX	proliferating cones
ARL4C	2.71e-33	1.46096	0.271	0.085	5.26e-29	4	ARL4C	proliferating cones
CDT1	9.56e-31	1.45816	0.308	0.117	1.86e-26	4	CDT1	proliferating cones
BRD2	4.13e-22	1.4546	0.526	0.443	8.02e-18	4	BRD2	proliferating cones
SMARCA4	3.34e-13	1.43767	0.406	0.323	6.49e-09	4	SMARCA4	proliferating cones
PRRC2C	5.03e-10	1.43706	0.489	0.543	9.77e-06	4	PRRC2C	proliferating cones
GADD45G	1.6e-56	1.42805	0.492	0.178	3.11e-52	4	GADD45G	proliferating cones
MCM7	4.28e-22	1.42209	0.391	0.227	8.31e-18	4	MCM7	proliferating cones
SNRPC	2.72e-15	1.41882	0.508	0.49	5.29e-11	4	SNRPC	proliferating cones
CBX5	2.35e-19	1.41685	0.542	0.506	4.56e-15	4	CBX5	proliferating cones
SNRNP48	1.59e-15	1.4166	0.268	0.139	3.08e-11	4	SNRNP48	proliferating cones
MKI67	2.01e-29	1.40508	0.289	0.102	3.91e-25	4	MKI67	proliferating cones
SRPK1	4.41e-13	1.40271	0.311	0.199	8.57e-09	4	SRPK1	proliferating cones
MAP2	2.77e-23	1.40177	0.314	0.143	5.38e-19	4	MAP2	proliferating cones
USP1	1.86e-11	1.4009	0.326	0.23	3.62e-07	4	USP1	proliferating cones
SRSF10	4.42e-17	1.39182	0.542	0.547	8.59e-13	4	SRSF10	proliferating cones
SLC38A5	8.13e-44	1.38327	0.237	0.052	1.58e-39	4	SLC38A5	proliferating cones
APLP1	8.69e-30	1.38264	0.338	0.139	1.69e-25	4	APLP1	proliferating cones
INA	6.28e-70	1.37797	0.302	0.05	1.22e-65	4	INA	proliferating cones
PTTG1	3.38e-24	1.37694	0.446	0.257	6.57e-20	4	PTTG1	proliferating cones
TMEM97	3.18e-13	1.36628	0.302	0.186	6.18e-09	4	TMEM97	proliferating cones
GAP43	4.3e-27	1.36352	0.425	0.226	8.36e-23	4	GAP43	proliferating cones
COX5A	5.7e-15	1.36274	0.529	0.552	1.11e-10	4	COX5A	proliferating cones
BAG6	0.000100055	1.36245	0.338	0.338	1	4	BAG6	proliferating cones
CDK5R1	5.1e-64	1.36135	0.212	0.027	9.9e-60	4	CDK5R1	proliferating cones
UNC119	1.55e-06	1.35955	0.311	0.265	0.0301237	4	UNC119	proliferating cones
DDX46	2.06e-06	1.35585	0.369	0.359	0.0399899	4	DDX46	proliferating cones
PKM	2.3e-30	1.35385	0.671	0.627	4.46e-26	4	PKM	proliferating cones
RRM2	1.03e-26	1.34249	0.265	0.095	2e-22	4	RRM2	proliferating cones
CRMP1	4.28e-46	1.34096	0.332	0.09	8.32e-42	4	CRMP1	proliferating cones
MIR7-3HG	1.41e-170	1.34003	0.218	0.004	2.73e-166	4	MIR7-3HG	proliferating cones
FSTL5	8.76e-105	1.33958	0.203	0.011	1.7e-100	4	FSTL5	proliferating cones
ENAH	2.26e-08	1.33869	0.385	0.349	0.000439498	4	ENAH	proliferating cones
TMEM14B	7.17e-20	1.33291	0.563	0.538	1.39e-15	4	TMEM14B	proliferating cones
TPX2	3.18e-26	1.31706	0.286	0.108	6.18e-22	4	TPX2	proliferating cones
CENPU	4.55e-17	1.31647	0.255	0.12	8.84e-13	4	CENPU	proliferating cones
HNRNPA0	1.15e-24	1.31052	0.634	0.662	2.23e-20	4	HNRNPA0	proliferating cones
TPD52	3.96e-42	1.3096	0.225	0.048	7.69e-38	4	TPD52	proliferating cones
LPGAT1	3.21e-14	1.30654	0.243	0.124	6.24e-10	4	LPGAT1	proliferating cones
TUBA1B	1.78e-88	1.30527	0.966	0.881	3.46e-84	4	TUBA1B	proliferating cones
ATAT1	1e-14	1.29974	0.277	0.152	1.95e-10	4	ATAT1	proliferating cones
TJP3	1.13e-174	1.29932	0.2	0.002	2.2e-170	4	TJP3	proliferating cones
SYP	7.84e-50	1.29809	0.222	0.04	1.52e-45	4	SYP	proliferating cones
DERA	4.2e-08	1.29582	0.277	0.201	0.000814871	4	DERA	proliferating cones
MSH6	5.75e-07	1.29302	0.302	0.245	0.0111626	4	MSH6	proliferating cones
KHDRBS1	3.26e-24	1.29181	0.615	0.619	6.33e-20	4	KHDRBS1	proliferating cones
TMPO	6.15e-08	1.28565	0.378	0.34	0.00119492	4	TMPO	proliferating cones
MRPL54	1.91e-07	1.28231	0.354	0.315	0.00370499	4	MRPL54	proliferating cones
BUB3	4.12e-07	1.28157	0.385	0.367	0.00800689	4	BUB3	proliferating cones
EHMT2	4.69e-07	1.28075	0.317	0.266	0.00910473	4	EHMT2	proliferating cones
HMGN2	1.66e-66	1.27391	0.883	0.786	3.22e-62	4	HMGN2	proliferating cones
ZNF385A	2.62e-12	1.27085	0.249	0.138	5.09e-08	4	ZNF385A	proliferating cones
JARID2	2.99e-06	1.27035	0.246	0.183	0.0580453	4	JARID2	proliferating cones
SLC1A2	4.31e-47	1.26846	0.197	0.033	8.36e-43	4	SLC1A2	proliferating cones
NOL7	9.97e-07	1.26277	0.458	0.53	0.0193594	4	NOL7	proliferating cones
DUT	3.62e-08	1.26219	0.477	0.521	0.000703833	4	DUT	proliferating cones
H2AFV	4.57e-14	1.26014	0.523	0.524	8.88e-10	4	H2AFV	proliferating cones
YWHAZ	3.54e-21	1.26014	0.575	0.552	6.87e-17	4	YWHAZ	proliferating cones
MCUR1	2.82e-05	1.25893	0.295	0.261	0.546748	4	MCUR1	proliferating cones
KPNB1	7.39e-07	1.25861	0.397	0.393	0.0143435	4	KPNB1	proliferating cones
ELOVL2	3.96e-58	1.25843	0.218	0.033	7.69e-54	4	ELOVL2	proliferating cones
SMC2	2.84e-10	1.25527	0.298	0.204	5.51e-06	4	SMC2	proliferating cones
PFKP	7.11e-23	1.25262	0.206	0.067	1.38e-18	4	PFKP	proliferating cones
BEX1	7.98e-15	1.24829	0.351	0.222	1.55e-10	4	BEX1	proliferating cones
PGP	1.18e-07	1.24426	0.246	0.169	0.0022998	4	PGP	proliferating cones
TAF11	0.000200822	1.24135	0.345	0.355	1	4	TAF11	proliferating cones
ATCAY	7.57e-85	1.23597	0.212	0.018	1.47e-80	4	ATCAY	proliferating cones
PHF19	1.46e-14	1.23524	0.24	0.119	2.83e-10	4	PHF19	proliferating cones
DAXX	2.07e-10	1.22618	0.218	0.121	4.02e-06	4	DAXX	proliferating cones
NASP	9.96e-11	1.22488	0.526	0.59	1.93e-06	4	NASP	proliferating cones
LSM4	1.2e-10	1.22378	0.48	0.483	2.33e-06	4	LSM4	proliferating cones
YBX1	7.35e-86	1.22377	0.954	0.914	1.43e-81	4	YBX1	proliferating cones
SOX4	9.66e-62	1.22327	0.849	0.662	1.88e-57	4	SOX4	proliferating cones
PPP1R18	7.1e-15	1.22084	0.246	0.123	1.38e-10	4	PPP1R18	proliferating cones
NUDT15	1.18e-11	1.22078	0.234	0.128	2.3e-07	4	NUDT15	proliferating cones
ZNF451	5.73e-05	1.2176	0.271	0.231	1	4	ZNF451	proliferating cones
SFPQ	2.18e-14	1.2113	0.575	0.645	4.23e-10	4	SFPQ	proliferating cones
SNRPD1	2.52e-11	1.20906	0.517	0.568	4.89e-07	4	SNRPD1	proliferating cones
RPS7	8.29e-124	1.20897	1	0.979	1.61e-119	4	RPS7	proliferating cones
RBP3	3.59e-177	1.20329	0.185	0	6.97e-173	4	RBP3	proliferating cones
AHI1	1.57e-05	1.20286	0.277	0.228	0.304152	4	AHI1	proliferating cones
TOMM20	2.91e-12	1.20163	0.569	0.681	5.65e-08	4	TOMM20	proliferating cones
PCBP1	1.75e-13	1.20153	0.569	0.667	3.4e-09	4	PCBP1	proliferating cones
RRM1	2.75e-06	1.20108	0.262	0.201	0.0533477	4	RRM1	proliferating cones
DCX	4.19e-42	1.19702	0.262	0.063	8.13e-38	4	DCX	proliferating cones
ACP1	1.26e-05	1.19685	0.468	0.576	0.244743	4	ACP1	proliferating cones
CDKN2D	1.81e-05	1.19411	0.286	0.242	0.351759	4	CDKN2D	proliferating cones
THRB	1.77e-68	1.19198	0.182	0.017	3.44e-64	4	THRB	proliferating cones
HPCA	3.77e-55	1.18786	0.188	0.025	7.32e-51	4	HPCA	proliferating cones
GLO1	1.95e-05	1.18686	0.425	0.484	0.379271	4	GLO1	proliferating cones
ATP6V1G2	2.45e-43	1.18583	0.185	0.031	4.76e-39	4	ATP6V1G2	proliferating cones
SRSF3	3.87e-41	1.18167	0.76	0.766	7.51e-37	4	SRSF3	proliferating cones
IRF2BP2	0.000390536	1.18142	0.292	0.273	1	4	IRF2BP2	proliferating cones
MAK	1.84e-54	1.17932	0.169	0.02	3.58e-50	4	MAK	proliferating cones
NOP56	4.05e-05	1.17798	0.394	0.422	0.786542	4	NOP56	proliferating cones
RAD51C	1.08e-05	1.17795	0.24	0.183	0.210432	4	RAD51C	proliferating cones
CDKN2A	1.92e-110	1.17778	0.182	0.007	3.72e-106	4	CDKN2A	proliferating cones
RANBP1	8.56e-11	1.17483	0.538	0.61	1.66e-06	4	RANBP1	proliferating cones
SMC1A	0.000490121	1.17458	0.249	0.217	1	4	SMC1A	proliferating cones
HELLS	9.83e-08	1.17335	0.268	0.192	0.00190795	4	HELLS	proliferating cones
BIRC5	4.26e-18	1.17235	0.283	0.135	8.27e-14	4	BIRC5	proliferating cones
CCDC181	2.75e-24	1.17076	0.197	0.059	5.34e-20	4	CCDC181	proliferating cones
LSM2	0.000644064	1.16475	0.409	0.491	1	4	LSM2	proliferating cones
OCIAD2	0.00806539	1.16453	0.311	0.334	1	4	OCIAD2	proliferating cones
ENDOG	1.85e-05	1.16374	0.231	0.174	0.35968	4	ENDOG	proliferating cones
VAMP2	5.57e-05	1.16254	0.462	0.579	1	4	VAMP2	proliferating cones
RGS16	5.49e-15	1.16136	0.258	0.13	1.07e-10	4	RGS16	proliferating cones
MCM4	1.51e-11	1.16112	0.209	0.106	2.93e-07	4	MCM4	proliferating cones
NNAT1	1.13e-15	1.15858	0.498	0.421	2.19e-11	4	NNAT	proliferating cones
RAMP1	1.03e-63	1.15689	0.185	0.02	1.99e-59	4	RAMP1	proliferating cones
FEN1	6.8e-16	1.15396	0.206	0.086	1.32e-11	4	FEN1	proliferating cones
CENPA	6.81e-24	1.15152	0.212	0.068	1.32e-19	4	CENPA	proliferating cones
KCNK3	2.33e-138	1.15092	0.175	0.003	4.53e-134	4	KCNK3	proliferating cones
TRA2B	8.8e-05	1.15083	0.422	0.484	1	4	TRA2B	proliferating cones
CCT2	1.01e-08	1.14974	0.511	0.609	0.000195316	4	CCT2	proliferating cones
SMS	4.72e-05	1.14622	0.36	0.363	0.917179	4	SMS	proliferating cones
E2F1	1.22e-20	1.14452	0.191	0.063	2.37e-16	4	E2F1	proliferating cones
RAD21	0.000620364	1.14246	0.388	0.433	1	4	RAD21	proliferating cones
ZNF738	0.000141173	1.13909	0.258	0.221	1	4	ZNF738	proliferating cones
SF1	0.00206837	1.13827	0.369	0.421	1	4	SF1	proliferating cones
TRIB2	1.58e-05	1.13725	0.231	0.173	0.307458	4	TRIB2	proliferating cones
PBRM1	0.00112725	1.13603	0.295	0.289	1	4	PBRM1	proliferating cones
CCT5	0.000922084	1.13513	0.412	0.495	1	4	CCT5	proliferating cones
CCT6A	0.000118115	1.13507	0.449	0.551	1	4	CCT6A	proliferating cones
KLHL23	1.81e-07	1.13163	0.234	0.156	0.00351575	4	KLHL23	proliferating cones
KPNA2	2.65e-10	1.13097	0.385	0.294	5.16e-06	4	KPNA2	proliferating cones
SNRPE	2.52e-12	1.12944	0.566	0.665	4.89e-08	4	SNRPE	proliferating cones
GGCT	5.21e-05	1.11898	0.274	0.234	1	4	GGCT	proliferating cones
TECR	0.000600811	1.11512	0.409	0.482	1	4	TECR	proliferating cones
DHPS	0.00792457	1.10993	0.354	0.411	1	4	DHPS	proliferating cones
CDKN2C	6.76e-18	1.10817	0.182	0.064	1.31e-13	4	CDKN2C	proliferating cones
EPB41	0.00937381	1.10574	0.286	0.294	1	4	EPB41	proliferating cones
CSNK2B	1.34e-06	1.10526	0.498	0.623	0.0259361	4	CSNK2B	proliferating cones
ARL6IP1	7.5e-06	1.10271	0.465	0.508	0.145561	4	ARL6IP1	proliferating cones
RBP4	1.02e-36	1.10251	0.175	0.033	1.98e-32	4	RBP4	proliferating cones
PLEKHB1	7.62e-40	1.10162	0.163	0.026	1.48e-35	4	PLEKHB1	proliferating cones
EZH2	3.03e-07	1.10046	0.252	0.178	0.00587646	4	EZH2	proliferating cones
BASP11	4.1e-37	1.09891	0.745	0.668	7.96e-33	4	BASP1	proliferating cones
USP49	2.73e-26	1.09802	0.182	0.048	5.3e-22	4	USP49	proliferating cones
DNAJC9	3.34e-05	1.09357	0.255	0.206	0.649374	4	DNAJC9	proliferating cones
CPLX3	9.59e-95	1.0895	0.166	0.008	1.86e-90	4	CPLX3	proliferating cones
HDAC2	0.00142976	1.08818	0.412	0.499	1	4	HDAC2	proliferating cones
RBM8A	2.24e-15	1.0861	0.597	0.682	4.34e-11	4	RBM8A	proliferating cones
TUBB4B	5.94e-37	1.08572	0.738	0.623	1.15e-32	4	TUBB4B	proliferating cones
ATP6V0B	2.11e-06	1.08282	0.465	0.524	0.0409646	4	ATP6V0B	proliferating cones
MCM5	0.000668273	1.08147	0.203	0.161	1	4	MCM5	proliferating cones
HNRNPU	3.32e-15	1.07441	0.594	0.658	6.45e-11	4	HNRNPU	proliferating cones
DPYSL3	8.07e-06	1.07428	0.332	0.295	0.1567	4	DPYSL3	proliferating cones
GPC2	2.16e-08	1.07292	0.2	0.115	0.000419846	4	GPC2	proliferating cones
TCF19	1.18e-26	1.07043	0.166	0.04	2.3e-22	4	TCF19	proliferating cones
C6orf62	0.00952922	1.06895	0.24	0.227	1	4	C6orf62	proliferating cones
CCNB2	1.61e-10	1.06887	0.268	0.159	3.12e-06	4	CCNB2	proliferating cones
ORC6	1.87e-11	1.06842	0.197	0.097	3.63e-07	4	ORC6	proliferating cones
CHCHD2	4.37e-54	1.06759	0.837	0.851	8.48e-50	4	CHCHD2	proliferating cones
NDUFS6	0.000170793	1.06742	0.48	0.633	1	4	NDUFS6	proliferating cones
ISL2	1.3e-123	1.06734	0.166	0.003	2.52e-119	4	ISL2	proliferating cones
CXXC5	2.15e-05	1.06642	0.335	0.308	0.416756	4	CXXC5	proliferating cones
CCDC60	5.32e-144	1.05854	0.157	0.001	1.03e-139	4	CCDC60	proliferating cones
ESD	1.04e-12	1.05815	0.548	0.626	2.03e-08	4	ESD	proliferating cones
TUBB2A	8.53e-10	1.05166	0.415	0.357	1.66e-05	4	TUBB2A	proliferating cones
TTLL7	7.47e-07	1.05061	0.228	0.155	0.0145051	4	TTLL7	proliferating cones
SET	5.59e-25	1.04512	0.708	0.79	1.09e-20	4	SET	proliferating cones
POU2F2	1.46e-37	1.03943	0.169	0.03	2.83e-33	4	POU2F2	proliferating cones
SMIM13	5.65e-21	1.03823	0.16	0.045	1.1e-16	4	SMIM13	proliferating cones
H3F3A	1.74e-91	1.03681	1	0.967	3.37e-87	4	H3F3A	proliferating cones
RFC4	0.000142593	1.03223	0.218	0.17	1	4	RFC4	proliferating cones
HNRNPM	4.84e-05	1.03137	0.471	0.577	0.940652	4	HNRNPM	proliferating cones
NUP58	0.0029975	1.02957	0.212	0.182	1	4	NUP58	proliferating cones
RABGAP1L	4.05e-07	1.02864	0.191	0.116	0.00787134	4	RABGAP1L	proliferating cones
SRSF7	1.23e-20	1.02773	0.625	0.65	2.39e-16	4	SRSF7	proliferating cones
GPM6A	1.92e-18	1.02327	0.258	0.112	3.73e-14	4	GPM6A	proliferating cones
FUS	1.32e-07	1.02249	0.523	0.639	0.00255695	4	FUS	proliferating cones
BRINP1	9.63e-58	1.01693	0.138	0.011	1.87e-53	4	BRINP1	proliferating cones
CCNI	2.15e-40	1.01563	0.785	0.797	4.18e-36	4	CCNI	proliferating cones
NRL	4.8e-53	1.01242	0.148	0.015	9.33e-49	4	NRL	proliferating cones
GUK1	1.12e-07	1.00968	0.545	0.671	0.00217424	4	GUK1	proliferating cones
TRIR	1.87e-16	1.00679	0.634	0.763	3.62e-12	4	TRIR	proliferating cones
ADGRV1	7.83e-25	1.00035	0.166	0.042	1.52e-20	4	ADGRV1	proliferating cones
CDCA7	4.94e-12	0.998848	0.151	0.06	9.58e-08	4	CDCA7	proliferating cones
WDR76	3.34e-15	0.992086	0.151	0.052	6.48e-11	4	WDR76	proliferating cones
ATP1B2	0.000618384	0.986334	0.2	0.157	1	4	ATP1B2	proliferating cones
CELF3	2e-44	0.984794	0.163	0.023	3.89e-40	4	CELF3	proliferating cones
CENPJ	9.22e-09	0.983927	0.166	0.085	0.000179012	4	CENPJ	proliferating cones
SNRPG	1.46e-14	0.983677	0.588	0.636	2.83e-10	4	SNRPG	proliferating cones
JPT1	9.55e-09	0.980754	0.545	0.607	0.000185502	4	JPT1	proliferating cones
PMAIP1	3.97e-15	0.978548	0.163	0.059	7.7e-11	4	PMAIP1	proliferating cones
SMC6	0.00317869	0.977221	0.194	0.16	1	4	SMC6	proliferating cones
RORB	5.78e-11	0.977115	0.268	0.155	1.12e-06	4	RORB	proliferating cones
FGF12	4.79e-26	0.976956	0.138	0.029	9.3e-22	4	FGF12	proliferating cones
LHX3	2.04e-126	0.973884	0.129	0	3.96e-122	4	LHX3	proliferating cones
EIF5	0.00020499	0.972814	0.462	0.553	1	4	EIF5	proliferating cones
MCM6	0.000464735	0.968179	0.166	0.119	1	4	MCM6	proliferating cones
LIG1	6.15e-07	0.96784	0.182	0.108	0.0119497	4	LIG1	proliferating cones
MYBL2	7.52e-16	0.964071	0.169	0.062	1.46e-11	4	MYBL2	proliferating cones
MAD2L1	7.33e-08	0.959215	0.252	0.167	0.00142346	4	MAD2L1	proliferating cones
HINT1	1.18e-31	0.954676	0.791	0.819	2.29e-27	4	HINT1	proliferating cones
CNTNAP2	1.83e-05	0.951378	0.151	0.091	0.354702	4	CNTNAP2	proliferating cones
HNRNPR	2.39e-05	0.933468	0.492	0.62	0.464785	4	HNRNPR	proliferating cones
TMSB15A	0.000418677	0.930543	0.397	0.426	1	4	TMSB15A	proliferating cones
STX3	2.89e-15	0.928389	0.154	0.053	5.62e-11	4	STX3	proliferating cones
ATAD2	1.11e-05	0.928351	0.175	0.113	0.216193	4	ATAD2	proliferating cones
GTSE1	9.87e-10	0.927226	0.166	0.079	1.92e-05	4	GTSE1	proliferating cones
AGAP1	2.33e-10	0.926613	0.163	0.075	4.52e-06	4	AGAP1	proliferating cones
CENPN	6.51e-09	0.925445	0.175	0.091	0.000126362	4	CENPN	proliferating cones
NDUFB11	1.55e-07	0.92343	0.551	0.715	0.00300363	4	NDUFB11	proliferating cones
YWHAB	0.00769813	0.918678	0.455	0.617	1	4	YWHAB	proliferating cones
ELAVL3	1.42e-17	0.916964	0.151	0.045	2.76e-13	4	ELAVL3	proliferating cones
RASA4	1.18e-12	0.916772	0.138	0.051	2.3e-08	4	RASA4	proliferating cones
SCN3B	2.48e-41	0.915669	0.142	0.018	4.81e-37	4	SCN3B	proliferating cones
PEA15	0.000542693	0.91036	0.191	0.145	1	4	PEA15	proliferating cones
VRK1	0.00161678	0.907434	0.163	0.122	1	4	VRK1	proliferating cones
CCDC141	1.72e-64	0.907317	0.123	0.007	3.34e-60	4	CCDC141	proliferating cones
GLRX5	8.12e-05	0.906421	0.483	0.586	1	4	GLRX5	proliferating cones
RTN4	2.81e-14	0.905912	0.628	0.716	5.46e-10	4	RTN4	proliferating cones
LDHB	1.35e-35	0.905087	0.84	0.801	2.63e-31	4	LDHB	proliferating cones
MTHFD2	0.00189075	0.905087	0.178	0.139	1	4	MTHFD2	proliferating cones
HNRNPC	6.72e-12	0.903343	0.612	0.745	1.3e-07	4	HNRNPC	proliferating cones
CYCS	0.00493375	0.900837	0.412	0.496	1	4	CYCS	proliferating cones
SOX7	3.31e-55	0.900111	0.135	0.011	6.44e-51	4	SOX7	proliferating cones
PROM1	1.55e-39	0.891556	0.12	0.013	3.01e-35	4	PROM1	proliferating cones
INSM1	7.42e-45	0.89075	0.126	0.013	1.44e-40	4	INSM1	proliferating cones
SRRM4	6.15e-41	0.889166	0.135	0.017	1.19e-36	4	SRRM4	proliferating cones
BRCA2	1.17e-10	0.886362	0.129	0.05	2.26e-06	4	BRCA2	proliferating cones
PNISR	2.63e-08	0.885021	0.56	0.673	0.000510603	4	PNISR	proliferating cones
UHRF1	1.54e-07	0.882037	0.157	0.083	0.002991	4	UHRF1	proliferating cones
ACOT7	5.11e-08	0.881608	0.151	0.076	0.000992285	4	ACOT7	proliferating cones
LMNB1	0.00429623	0.879673	0.194	0.161	1	4	LMNB1	proliferating cones
IMPG2	8.84e-88	0.879552	0.123	0.003	1.72e-83	4	IMPG2	proliferating cones
PHACTR1	1.09e-05	0.878337	0.12	0.064	0.211754	4	PHACTR1	proliferating cones
SNRPF	0.00180119	0.8771	0.465	0.611	1	4	SNRPF	proliferating cones
DBF4	0.000104593	0.876178	0.16	0.106	1	4	DBF4	proliferating cones
PCBP2	1.39e-10	0.870525	0.597	0.769	2.7e-06	4	PCBP2	proliferating cones
RAD51AP1	0.000148102	0.865483	0.157	0.104	1	4	RAD51AP1	proliferating cones
EEF2	1.02e-39	0.86354	0.868	0.892	1.99e-35	4	EEF2	proliferating cones
FAM111B	4.13e-16	0.862373	0.123	0.035	8.02e-12	4	FAM111B	proliferating cones
MAB21L1	2.33e-09	0.86027	0.286	0.18	4.53e-05	4	MAB21L1	proliferating cones
EEF1B2	2.9e-34	0.851638	0.868	0.862	5.62e-30	4	EEF1B2	proliferating cones
NEUROD4	1.04e-86	0.84797	0.111	0.002	2.03e-82	4	NEUROD4	proliferating cones
MTX3	0.000294413	0.846075	0.142	0.093	1	4	MTX3	proliferating cones
PTMA	7.12e-75	0.845738	0.994	0.969	1.38e-70	4	PTMA	proliferating cones
RNF165	3.96e-13	0.845495	0.148	0.054	7.69e-09	4	RNF165	proliferating cones
AL451062.1	2.39e-102	0.842387	0.117	0.001	4.65e-98	4	AL451062.1	proliferating cones
PCLAF	2.59e-05	0.837361	0.283	0.221	0.50273	4	PCLAF	proliferating cones
E2F3	1.52e-08	0.833231	0.12	0.051	0.000295715	4	E2F3	proliferating cones
GUCY1A2	1.07e-11	0.830394	0.123	0.044	2.08e-07	4	GUCY1A2	proliferating cones
ZFAT	1.18e-28	0.824633	0.12	0.02	2.29e-24	4	ZFAT	proliferating cones
CHD7	1.54e-07	0.823678	0.197	0.114	0.00298131	4	CHD7	proliferating cones
CDKAL1	0.00079557	0.822676	0.138	0.093	1	4	CDKAL1	proliferating cones
SYT11	0.000355368	0.820169	0.145	0.095	1	4	SYT11	proliferating cones
HIST1H1B	7.73e-07	0.819941	0.114	0.053	0.0150035	4	HIST1H1B	proliferating cones
LSM7	0.000481281	0.818713	0.502	0.673	1	4	LSM7	proliferating cones
GDAP1	0.00141922	0.814599	0.135	0.093	1	4	GDAP1	proliferating cones
INSM2	2.17e-69	0.813604	0.126	0.006	4.21e-65	4	INSM2	proliferating cones
NAP1L1	7.64e-19	0.809895	0.72	0.786	1.48e-14	4	NAP1L1	proliferating cones
MCM2	5.89e-05	0.807593	0.154	0.097	1	4	MCM2	proliferating cones
SALL1	6.58e-42	0.805427	0.142	0.018	1.28e-37	4	SALL1	proliferating cones
NPTX1	2.25e-57	0.803857	0.114	0.007	4.36e-53	4	NPTX1	proliferating cones
VAX2	5.47e-20	0.803038	0.123	0.029	1.06e-15	4	VAX2	proliferating cones
RAN	6.26e-28	0.7991	0.763	0.821	1.22e-23	4	RAN	proliferating cones
VARS	0.00545094	0.798233	0.142	0.106	1	4	VARS	proliferating cones
CCNA2	4.15e-08	0.790362	0.172	0.091	0.000806832	4	CCNA2	proliferating cones
MT-ND21	2.46e-26	0.781853	0.806	0.793	4.77e-22	4	MT-ND2	proliferating cones
HSP90AB1	1.58e-33	0.781362	0.926	0.941	3.07e-29	4	HSP90AB1	proliferating cones
DOK6	0.00305711	0.777347	0.138	0.1	1	4	DOK6	proliferating cones
CPLX4	4.33e-85	0.777275	0.102	0.001	8.4e-81	4	CPLX4	proliferating cones
PRC1	3.86e-05	0.775697	0.151	0.093	0.749955	4	PRC1	proliferating cones
KLF11	2.43e-07	0.773943	0.135	0.067	0.00472102	4	KLF11	proliferating cones
PEX5L	7.58e-29	0.773555	0.105	0.015	1.47e-24	4	PEX5L	proliferating cones
PAQR4	3.6e-12	0.772865	0.114	0.037	6.99e-08	4	PAQR4	proliferating cones
DTL	4.34e-11	0.770741	0.12	0.043	8.43e-07	4	DTL	proliferating cones
GRHL1	3.83e-18	0.770115	0.105	0.023	7.43e-14	4	GRHL1	proliferating cones
SGO2	0.000571988	0.769515	0.135	0.088	1	4	SGO2	proliferating cones
JUND	4.68e-15	0.768649	0.698	0.749	9.08e-11	4	JUND	proliferating cones
LDHA	1.37e-10	0.762029	0.705	0.78	2.66e-06	4	LDHA	proliferating cones
SYK	3.16e-102	0.759726	0.114	0.001	6.14e-98	4	SYK	proliferating cones
RASGEF1B	3.88e-06	0.757497	0.111	0.054	0.0753743	4	RASGEF1B	proliferating cones
HSP90AA1	2.19e-36	0.757449	0.972	0.927	4.25e-32	4	HSP90AA1	proliferating cones
GPX4	2e-09	0.756136	0.625	0.798	3.88e-05	4	GPX4	proliferating cones
CDCA8	4.01e-07	0.755176	0.129	0.063	0.00779083	4	CDCA8	proliferating cones
ARHGAP33	3.46e-05	0.753226	0.145	0.087	0.67208	4	ARHGAP33	proliferating cones
PBK	8.44e-05	0.753063	0.154	0.098	1	4	PBK	proliferating cones
CHAF1A	6.44e-07	0.749838	0.114	0.053	0.0125113	4	CHAF1A	proliferating cones
SF3B6	6.03e-07	0.748578	0.557	0.722	0.0117154	4	SF3B6	proliferating cones
RTN1	4.98e-22	0.745416	0.215	0.069	9.68e-18	4	RTN1	proliferating cones
CFL1	3.53e-23	0.743966	0.788	0.826	6.85e-19	4	CFL1	proliferating cones
GEN1	4.66e-09	0.742244	0.111	0.043	9.06e-05	4	GEN1	proliferating cones
PLK1	5.38e-08	0.739775	0.138	0.065	0.00104455	4	PLK1	proliferating cones
CHGB	4.37e-19	0.734744	0.105	0.022	8.49e-15	4	CHGB	proliferating cones
CKAP2L	0.00346621	0.733233	0.114	0.076	1	4	CKAP2L	proliferating cones
RPS18	3.86e-60	0.731012	1	0.995	7.5e-56	4	RPS18	proliferating cones
ATP8A2	8.83e-08	0.729646	0.111	0.047	0.00171465	4	ATP8A2	proliferating cones
CALM2	6.25e-35	0.729244	0.84	0.876	1.21e-30	4	CALM2	proliferating cones
WBP11	0.00479113	0.728134	0.197	0.339	1	4	WBP11	proliferating cones
ASPM	0.000539312	0.727979	0.16	0.109	1	4	ASPM	proliferating cones
NCL	0.000260635	0.727951	0.535	0.713	1	4	NCL	proliferating cones
RFC3	0.00759658	0.727308	0.132	0.098	1	4	RFC3	proliferating cones
NLK	3.97e-06	0.726208	0.108	0.052	0.0771819	4	NLK	proliferating cones
POLR1C	0.00133278	0.725121	0.12	0.078	1	4	POLR1C	proliferating cones
SERTAD4	0.00185801	0.724117	0.145	0.103	1	4	SERTAD4	proliferating cones
CENPL	0.000381938	0.719358	0.102	0.058	1	4	CENPL	proliferating cones
MATK	1.91e-23	0.71849	0.108	0.019	3.71e-19	4	MATK	proliferating cones
RPL21	7.34e-44	0.71768	0.972	0.986	1.42e-39	4	RPL21	proliferating cones
HNRNPA3	3.11e-05	0.712732	0.542	0.688	0.603775	4	HNRNPA3	proliferating cones
SNAP25	2.41e-08	0.711925	0.114	0.047	0.000468648	4	SNAP25	proliferating cones
PRR36	1.78e-06	0.709487	0.108	0.05	0.0346511	4	PRR36	proliferating cones
TMEM14C	1.22e-05	0.703122	0.548	0.687	0.236602	4	TMEM14C	proliferating cones
SGO1	9.38e-05	0.701582	0.117	0.067	1	4	SGO1	proliferating cones
SLC7A1	3.04e-05	0.701243	0.102	0.052	0.589512	4	SLC7A1	proliferating cones
KDM1B	1.09e-06	0.701135	0.111	0.052	0.0211191	4	KDM1B	proliferating cones
PCBP3	9.05e-11	0.701038	0.108	0.037	1.76e-06	4	PCBP3	proliferating cones
EI24	0.000237575	0.699885	0.206	0.387	1	4	EI24	proliferating cones
FANCI	0.00226674	0.699617	0.105	0.066	1	4	FANCI	proliferating cones
RBM39	2.92e-05	0.697959	0.548	0.717	0.567998	4	RBM39	proliferating cones
PDCD5	0.00840379	0.695852	0.298	0.523	1	4	PDCD5	proliferating cones
CALM1	0.00947339	0.695549	0.505	0.689	1	4	CALM1	proliferating cones
UQCRFS1	0.00846258	0.695072	0.302	0.534	1	4	UQCRFS1	proliferating cones
UQCRH	2.18e-17	0.693435	0.717	0.834	4.24e-13	4	UQCRH	proliferating cones
BSG	0.00269713	0.690975	0.526	0.732	1	4	BSG	proliferating cones
MYCN	7.72e-07	0.69084	0.126	0.062	0.0149907	4	MYCN	proliferating cones
PDIA6	0.00035075	0.687796	0.505	0.629	1	4	PDIA6	proliferating cones
TMEM38A	3.35e-12	0.685737	0.111	0.035	6.5e-08	4	TMEM38A	proliferating cones
DEGS1	0.00399308	0.684774	0.191	0.329	1	4	DEGS1	proliferating cones
FJX1	0.00763112	0.681696	0.129	0.095	1	4	FJX1	proliferating cones
GUCA1A	1.71e-07	0.679989	0.105	0.044	0.00332497	4	GUCA1A	proliferating cones
ATP5F1B	3.43e-07	0.676811	0.597	0.786	0.00666096	4	ATP5F1B	proliferating cones
PTMS	3.11e-15	0.675187	0.738	0.841	6.04e-11	4	PTMS	proliferating cones
YWHAE	6e-14	0.666699	0.705	0.802	1.17e-09	4	YWHAE	proliferating cones
PPT2	0.0025682	0.666628	0.105	0.067	1	4	PPT2	proliferating cones
RAB11B	0.00465173	0.664479	0.274	0.483	1	4	RAB11B	proliferating cones
DCC	1.14e-15	0.661323	0.111	0.028	2.21e-11	4	DCC	proliferating cones
RDX	0.00188735	0.6607	0.249	0.443	1	4	RDX	proliferating cones
KNL1	0.0012328	0.657648	0.111	0.069	1	4	KNL1	proliferating cones
GNL1	0.00121558	0.655164	0.182	0.327	1	4	GNL1	proliferating cones
ONECUT2	2.54e-17	0.654642	0.123	0.032	4.94e-13	4	ONECUT2	proliferating cones
AUP1	0.00162963	0.65459	0.215	0.383	1	4	AUP1	proliferating cones
ZNF638	0.00735773	0.653261	0.231	0.39	1	4	ZNF638	proliferating cones
ARF6	0.0012554	0.647868	0.175	0.316	1	4	ARF6	proliferating cones
ABI2	0.00449001	0.647669	0.212	0.366	1	4	ABI2	proliferating cones
SBK1	0.00465016	0.646034	0.129	0.091	1	4	SBK1	proliferating cones
MCM8	5.28e-09	0.645933	0.105	0.039	0.000102493	4	MCM8	proliferating cones
HNRNPA2B1	3.38e-21	0.639226	0.8	0.872	6.56e-17	4	HNRNPA2B1	proliferating cones
CENPE	0.00770239	0.638205	0.117	0.082	1	4	CENPE	proliferating cones
SF3A3	0.00304107	0.637839	0.194	0.337	1	4	SF3A3	proliferating cones
TTC3	3.75e-06	0.637243	0.566	0.69	0.072852	4	TTC3	proliferating cones
RCBTB2	0.00116711	0.635974	0.142	0.259	1	4	RCBTB2	proliferating cones
CDC20	0.000350826	0.634774	0.151	0.097	1	4	CDC20	proliferating cones
APMAP	0.00108964	0.633873	0.16	0.29	1	4	APMAP	proliferating cones
MRPL22	0.000208148	0.633036	0.215	0.406	1	4	MRPL22	proliferating cones
RBM26	0.00406419	0.63302	0.166	0.286	1	4	RBM26	proliferating cones
PHAX	0.000122134	0.632564	0.182	0.35	1	4	PHAX	proliferating cones
OLA1	0.00641673	0.631335	0.265	0.458	1	4	OLA1	proliferating cones
SMARCA5	0.000660906	0.631278	0.212	0.385	1	4	SMARCA5	proliferating cones
PAXX	0.00112385	0.628767	0.169	0.305	1	4	PAXX	proliferating cones
RPS10	1.75e-21	0.628086	0.911	0.927	3.4e-17	4	RPS10	proliferating cones
BPTF	0.00177094	0.627386	0.258	0.461	1	4	BPTF	proliferating cones
TMEM183A	0.000415016	0.625082	0.166	0.311	1	4	TMEM183A	proliferating cones
WAC	0.00971581	0.622443	0.206	0.345	1	4	WAC	proliferating cones
PRDX2	1.17e-34	0.621405	0.852	0.838	2.27e-30	4	PRDX2	proliferating cones
H1FX	9.94e-09	0.620575	0.655	0.772	0.000193015	4	H1FX	proliferating cones
ELAVL1	0.000902842	0.620268	0.222	0.4	1	4	ELAVL1	proliferating cones
YY1	0.000700486	0.619153	0.246	0.451	1	4	YY1	proliferating cones
VPS35	0.000739528	0.614497	0.234	0.425	1	4	VPS35	proliferating cones
XRN2	0.00191814	0.614271	0.228	0.401	1	4	XRN2	proliferating cones
SERBP1	4.11e-06	0.613983	0.582	0.766	0.0798238	4	SERBP1	proliferating cones
MRPS23	0.0092012	0.611863	0.166	0.277	1	4	MRPS23	proliferating cones
PRPF40A	0.00298951	0.611179	0.262	0.463	1	4	PRPF40A	proliferating cones
SAP18	4.32e-06	0.611004	0.578	0.76	0.0839413	4	SAP18	proliferating cones
PSMB3	0.00341501	0.610723	0.308	0.552	1	4	PSMB3	proliferating cones
MTPN	0.00041246	0.609793	0.185	0.343	1	4	MTPN	proliferating cones
SUMO2	3.49e-23	0.606753	0.831	0.895	6.78e-19	4	SUMO2	proliferating cones
NUDT21	0.00328347	0.605967	0.132	0.233	1	4	NUDT21	proliferating cones
SLTM	0.00314935	0.60506	0.2	0.347	1	4	SLTM	proliferating cones
USP16	7.87e-07	0.603799	0.172	0.375	0.0152874	4	USP16	proliferating cones
COA6	0.000712954	0.603337	0.154	0.284	1	4	COA6	proliferating cones
ARPC1A	5.07e-06	0.603304	0.222	0.453	0.0985408	4	ARPC1A	proliferating cones
VPS72	0.00245315	0.602162	0.175	0.307	1	4	VPS72	proliferating cones
TMX41	0.00546295	0.600041	0.172	0.293	1	4	TMX4	proliferating cones
PHF20	0.00987182	0.599946	0.151	0.251	1	4	PHF20	proliferating cones
DGUOK	0.00407245	0.597047	0.298	0.528	1	4	DGUOK	proliferating cones
MRPL47	0.00045662	0.596053	0.169	0.314	1	4	MRPL47	proliferating cones
GABPB1-AS1	0.00353739	0.594009	0.194	0.333	1	4	GABPB1-AS1	proliferating cones
SLU7	0.00204578	0.592454	0.135	0.243	1	4	SLU7	proliferating cones
UQCRC1	0.000120731	0.590709	0.182	0.347	1	4	UQCRC1	proliferating cones
PRPF8	0.00407384	0.588196	0.185	0.316	1	4	PRPF8	proliferating cones
PDLIM1	0.000127504	0.587813	0.114	0.064	1	4	PDLIM1	proliferating cones
MPHOSPH10	0.00212197	0.587458	0.154	0.273	1	4	MPHOSPH10	proliferating cones
PPIA	1.47e-19	0.587429	0.855	0.9	2.86e-15	4	PPIA	proliferating cones
PSMD14	0.000765731	0.587134	0.169	0.309	1	4	PSMD14	proliferating cones
THOC7	0.00140299	0.584702	0.182	0.324	1	4	THOC7	proliferating cones
MDH2	0.00295303	0.584565	0.326	0.596	1	4	MDH2	proliferating cones
THRAP3	0.00272727	0.584527	0.283	0.507	1	4	THRAP3	proliferating cones
EMC4	0.00130213	0.584359	0.258	0.468	1	4	EMC4	proliferating cones
GLRX3	0.000106961	0.58279	0.203	0.39	1	4	GLRX3	proliferating cones
CNOT7	0.000302247	0.580003	0.185	0.345	1	4	CNOT7	proliferating cones
PSMC6	3.05e-06	0.578192	0.225	0.463	0.05915	4	PSMC6	proliferating cones
RING1	0.00537822	0.576339	0.142	0.243	1	4	RING1	proliferating cones
EIF4H	0.000687782	0.575119	0.274	0.505	1	4	EIF4H	proliferating cones
MED4	3.9e-06	0.572653	0.188	0.389	0.075689	4	MED4	proliferating cones
RBM3	0.00967725	0.572476	0.295	0.51	1	4	RBM3	proliferating cones
SMIM7	0.000809022	0.571715	0.252	0.461	1	4	SMIM7	proliferating cones
CISD2	0.000232996	0.571623	0.163	0.309	1	4	CISD2	proliferating cones
KCTD20	0.00721126	0.569801	0.166	0.278	1	4	KCTD20	proliferating cones
ZNF644	0.000146057	0.569077	0.172	0.33	1	4	ZNF644	proliferating cones
ASH1L	0.000496368	0.567885	0.169	0.312	1	4	ASH1L	proliferating cones
IMMT	0.00776986	0.567125	0.151	0.254	1	4	IMMT	proliferating cones
TARS	0.000949525	0.566404	0.138	0.255	1	4	TARS	proliferating cones
LYPLA1	0.00865999	0.566273	0.16	0.267	1	4	LYPLA1	proliferating cones
PDS5B	4.32e-06	0.566101	0.178	0.371	0.083977	4	PDS5B	proliferating cones
ADI1	0.000120543	0.565964	0.178	0.343	1	4	ADI1	proliferating cones
SMARCB1	6.52e-06	0.5655	0.246	0.5	0.126688	4	SMARCB1	proliferating cones
TAGLN3	0.000455057	0.564982	0.142	0.09	1	4	TAGLN3	proliferating cones
HMGXB4	0.00147188	0.563837	0.148	0.266	1	4	HMGXB4	proliferating cones
ARPC5L	0.00169719	0.563285	0.154	0.274	1	4	ARPC5L	proliferating cones
AKIRIN1	0.000166982	0.561456	0.169	0.324	1	4	AKIRIN1	proliferating cones
KRR1	0.000212246	0.561271	0.182	0.343	1	4	KRR1	proliferating cones
FARP1	0.00237223	0.558607	0.2	0.348	1	4	FARP1	proliferating cones
DNAJC7	1.13e-05	0.558352	0.197	0.397	0.21924	4	DNAJC7	proliferating cones
AKR1B1	0.00393674	0.558271	0.222	0.38	1	4	AKR1B1	proliferating cones
FAM204A	0.000163739	0.557281	0.185	0.351	1	4	FAM204A	proliferating cones
PSMD2	9.37e-06	0.556257	0.215	0.434	0.18195	4	PSMD2	proliferating cones
DDX24	0.000374398	0.555722	0.243	0.45	1	4	DDX24	proliferating cones
PRELID1	1.26e-07	0.554567	0.268	0.58	0.00243774	4	PRELID1	proliferating cones
EWSR1	0.000668962	0.553655	0.191	0.345	1	4	EWSR1	proliferating cones
PAICS	3.09e-05	0.55364	0.178	0.354	0.59933	4	PAICS	proliferating cones
HAUS1	0.000810818	0.553594	0.142	0.261	1	4	HAUS1	proliferating cones
KIDINS220	0.00297562	0.552527	0.215	0.371	1	4	KIDINS220	proliferating cones
FUBP1	9.01e-05	0.552386	0.169	0.328	1	4	FUBP1	proliferating cones
ATXN7L3B	0.000462779	0.552164	0.185	0.341	1	4	ATXN7L3B	proliferating cones
HAX1	1.47e-07	0.552005	0.203	0.447	0.00286417	4	HAX1	proliferating cones
CCNG1	0.000294864	0.549048	0.194	0.361	1	4	CCNG1	proliferating cones
DDX18	9.25e-05	0.544465	0.2	0.383	1	4	DDX18	proliferating cones
SMARCC2	0.00943666	0.544404	0.138	0.231	1	4	SMARCC2	proliferating cones
GAPDH	2.52e-36	0.544043	0.991	0.979	4.88e-32	4	GAPDH	proliferating cones
SRSF1	0.000306537	0.543887	0.206	0.38	1	4	SRSF1	proliferating cones
CCDC50	8.69e-05	0.542368	0.142	0.281	1	4	CCDC50	proliferating cones
DCTN1	0.00993846	0.538987	0.102	0.174	1	4	DCTN1	proliferating cones
MCL1	0.00074502	0.538796	0.215	0.389	1	4	MCL1	proliferating cones
CPSF6	0.000649109	0.538442	0.151	0.278	1	4	CPSF6	proliferating cones
SPTSSA	0.00693176	0.538189	0.154	0.258	1	4	SPTSSA	proliferating cones
TCEA1	3.92e-05	0.538091	0.252	0.493	0.762084	4	TCEA1	proliferating cones
ORMDL1	2.08e-05	0.537952	0.188	0.376	0.404129	4	ORMDL1	proliferating cones
SLC25A6	8e-09	0.537758	0.683	0.802	0.000155408	4	SLC25A6	proliferating cones
HSPH1	0.000127989	0.534571	0.231	0.427	1	4	HSPH1	proliferating cones
HP1BP3	0.000594154	0.534081	0.271	0.495	1	4	HP1BP3	proliferating cones
ADD2	0.00302116	0.533942	0.102	0.064	1	4	ADD2	proliferating cones
NUDC	3.11e-06	0.532896	0.252	0.515	0.0604167	4	NUDC	proliferating cones
ANP32B	0.00239112	0.531802	0.548	0.721	1	4	ANP32B	proliferating cones
ATP6V1H	0.000685021	0.531391	0.12	0.228	1	4	ATP6V1H	proliferating cones
MEX3A	0.00513966	0.530547	0.148	0.253	1	4	MEX3A	proliferating cones
TMEM132A	0.00182397	0.530412	0.163	0.288	1	4	TMEM132A	proliferating cones
PSMD7	0.000306387	0.530391	0.246	0.457	1	4	PSMD7	proliferating cones
MACF1	0.00239116	0.529187	0.197	0.341	1	4	MACF1	proliferating cones
ARPC5	4.45e-05	0.528276	0.243	0.473	0.864873	4	ARPC5	proliferating cones
DDRGK1	2.74e-05	0.528251	0.142	0.291	0.532704	4	DDRGK1	proliferating cones
DPYSL5	0.000852669	0.527859	0.105	0.062	1	4	DPYSL5	proliferating cones
ASB8	0.000425131	0.525789	0.126	0.242	1	4	ASB8	proliferating cones
POLD2	4.38e-05	0.525585	0.215	0.419	0.849715	4	POLD2	proliferating cones
SIX3	0.000501785	0.525323	0.228	0.168	1	4	SIX3	proliferating cones
IAH1	1.78e-06	0.524974	0.191	0.402	0.0345561	4	IAH1	proliferating cones
SCARB2	0.00148082	0.524967	0.191	0.336	1	4	SCARB2	proliferating cones
TPM3	2.35e-05	0.524895	0.258	0.507	0.455488	4	TPM3	proliferating cones
USP11	0.00163009	0.524415	0.197	0.347	1	4	USP11	proliferating cones
COX17	0.00661469	0.523861	0.178	0.298	1	4	COX17	proliferating cones
NAE1	0.000511744	0.523613	0.132	0.25	1	4	NAE1	proliferating cones
FBXO22	0.000705756	0.52278	0.16	0.291	1	4	FBXO22	proliferating cones
REL	0.0073133	0.522219	0.12	0.206	1	4	REL	proliferating cones
SGCD	0.00997667	0.521345	0.102	0.174	1	4	SGCD	proliferating cones
MRPS34	1.61e-06	0.517953	0.218	0.455	0.0313572	4	MRPS34	proliferating cones
DAZAP1	0.00831317	0.517804	0.154	0.257	1	4	DAZAP1	proliferating cones
ACTL6A	4.82e-05	0.517418	0.138	0.281	0.936021	4	ACTL6A	proliferating cones
TMEM11	0.000848836	0.514764	0.169	0.307	1	4	TMEM11	proliferating cones
ENOPH1	0.000557995	0.514463	0.117	0.224	1	4	ENOPH1	proliferating cones
PRDX3	0.000160996	0.514048	0.225	0.425	1	4	PRDX3	proliferating cones
HNRNPK	4.57e-05	0.513583	0.612	0.814	0.887853	4	HNRNPK	proliferating cones
SNRPA1	3.54e-05	0.513287	0.166	0.331	0.687463	4	SNRPA1	proliferating cones
PPP2R2A	2.17e-06	0.511848	0.142	0.311	0.0422154	4	PPP2R2A	proliferating cones
PPM1A	0.0091318	0.511765	0.12	0.203	1	4	PPM1A	proliferating cones
BZW2	0.000368204	0.510822	0.209	0.386	1	4	BZW2	proliferating cones
UBE2I	0.00014493	0.510569	0.32	0.619	1	4	UBE2I	proliferating cones
SPAG9	3.47e-05	0.50996	0.145	0.294	0.674375	4	SPAG9	proliferating cones
CEP57	5.3e-05	0.509893	0.178	0.35	1	4	CEP57	proliferating cones
RB1CC1	0.000259498	0.509407	0.157	0.297	1	4	RB1CC1	proliferating cones
LARP7	0.000494213	0.508938	0.172	0.317	1	4	LARP7	proliferating cones
NDUFA6	0.000837317	0.508783	0.32	0.586	1	4	NDUFA6	proliferating cones
CACUL1	0.00163501	0.507921	0.12	0.22	1	4	CACUL1	proliferating cones
PSMA3	6.78e-06	0.507527	0.209	0.423	0.13172	4	PSMA3	proliferating cones
SAFB2	0.00551891	0.507246	0.12	0.208	1	4	SAFB2	proliferating cones
DYNC1LI1	0.00147079	0.507177	0.157	0.281	1	4	DYNC1LI1	proliferating cones
NEDD4L	0.00290806	0.507166	0.126	0.223	1	4	NEDD4L	proliferating cones
HDGF	9.12e-06	0.506931	0.197	0.398	0.177146	4	HDGF	proliferating cones
U2SURP	0.00179391	0.506428	0.246	0.432	1	4	U2SURP	proliferating cones
MTMR4	0.00376869	0.506382	0.095	0.174	1	4	MTMR4	proliferating cones
TRIM44	0.000459847	0.504659	0.145	0.271	1	4	TRIM44	proliferating cones
CHTOP	0.000285138	0.504484	0.148	0.28	1	4	CHTOP	proliferating cones
TMEM14A	0.00378252	0.503604	0.114	0.203	1	4	TMEM14A	proliferating cones
RBBP6	3.47e-06	0.503541	0.185	0.384	0.0673931	4	RBBP6	proliferating cones
MRPS35	0.00011777	0.503412	0.126	0.253	1	4	MRPS35	proliferating cones
MIER1	4.27e-05	0.503389	0.102	0.22	0.829418	4	MIER1	proliferating cones
MRPL42	8.38e-06	0.503201	0.185	0.378	0.162709	4	MRPL42	proliferating cones
LARS	0.000129087	0.503143	0.148	0.287	1	4	LARS	proliferating cones
CCDC82	0.000201807	0.502675	0.132	0.259	1	4	CCDC82	proliferating cones
FAM96A	3.1e-05	0.502411	0.129	0.269	0.601565	4	FAM96A	proliferating cones
EIF2AK2	0.000267783	0.502349	0.138	0.266	1	4	EIF2AK2	proliferating cones
PSMC5	9.4e-06	0.500363	0.271	0.54	0.182615	4	PSMC5	proliferating cones
CEBPD1	1.04e-173	2.30181	0.922	0.275	2.02e-169	5	CEBPD	NC
ZFP362	8.82e-120	1.91263	0.932	0.377	1.71e-115	5	ZFP36	NC
CTGF1	6.02e-78	1.81786	0.895	0.44	1.17e-73	5	CTGF	NC
CTSC1	1.85e-153	1.79465	0.942	0.301	3.6e-149	5	CTSC	NC
SOCS33	3.38e-110	1.65502	0.959	0.453	6.57e-106	5	SOCS3	NC
JUNB3	2.86e-95	1.65445	0.973	0.612	5.55e-91	5	JUNB	NC
PITX11	1.43e-125	1.61356	0.936	0.353	2.77e-121	5	PITX1	NC
SULT1E12	7.64e-100	1.6048	0.827	0.279	1.48e-95	5	SULT1E1	NC
BGN1	2.88e-116	1.60055	0.875	0.271	5.59e-112	5	BGN	NC
BAMBI1	8.42e-139	1.59141	0.898	0.285	1.63e-134	5	BAMBI	NC
GMDS1	4.67e-155	1.58818	0.956	0.309	9.07e-151	5	GMDS	NC
PENK1	3.57e-45	1.58756	0.546	0.209	6.94e-41	5	PENK	NC
ID31	5.18e-90	1.56401	0.983	0.669	1.01e-85	5	ID3	NC
HSPA53	8.6e-99	1.51085	1	0.714	1.67e-94	5	HSPA5	NC
SELENOP	3.63e-119	1.49832	0.715	0.169	7.05e-115	5	SELENOP	NC
CYP26A1	3.69e-172	1.44027	0.583	0.074	7.16e-168	5	CYP26A1	NC
HES4	7.39e-126	1.43679	0.905	0.289	1.43e-121	5	HES4	NC
HERPUD11	6.82e-87	1.41268	0.932	0.468	1.32e-82	5	HERPUD1	NC
IER31	1.23e-87	1.39666	0.753	0.25	2.39e-83	5	IER3	NC
IFITM31	7.68e-101	1.36986	0.986	0.489	1.49e-96	5	IFITM3	NC
EDN31	5.12e-154	1.36692	0.888	0.231	9.93e-150	5	EDN3	NC
RAMP22	5.81e-106	1.34167	0.925	0.395	1.13e-101	5	RAMP2	NC
PCOLCE2	1.4e-106	1.26763	0.99	0.441	2.72e-102	5	PCOLCE	NC
RSPO3	8.71e-252	1.25751	0.647	0.058	1.69e-247	5	RSPO3	NC
MAFF1	8.8e-115	1.2573	0.793	0.231	1.71e-110	5	MAFF	NC
FOXC21	7.68e-144	1.24916	0.898	0.246	1.49e-139	5	FOXC2	NC
SLC26A7	1.77e-250	1.22635	0.668	0.062	3.44e-246	5	SLC26A7	NC
NR4A11	1.46e-83	1.20853	0.725	0.245	2.83e-79	5	NR4A1	NC
IGFBP7	1.86e-133	1.18726	0.953	0.296	3.62e-129	5	IGFBP7	NC
SHISA21	8.12e-178	1.15964	0.82	0.165	1.58e-173	5	SHISA2	NC
EMCN1	1.44e-165	1.1538	0.763	0.141	2.79e-161	5	EMCN	NC
CXCL121	1.05e-107	1.15035	0.824	0.265	2.05e-103	5	CXCL12	NC
FOXC12	5.76e-117	1.14999	0.942	0.337	1.12e-112	5	FOXC1	NC
NDNF2	1.39e-122	1.13883	0.831	0.231	2.71e-118	5	NDNF	NC
SOSTDC11	2.23e-109	1.12353	0.749	0.203	4.34e-105	5	SOSTDC1	NC
TPST1	5.9e-158	1.1234	0.763	0.163	1.15e-153	5	TPST1	NC
LAMA41	3.49e-88	1.12247	0.82	0.292	6.78e-84	5	LAMA4	NC
CYR611	7.34e-59	1.10545	0.905	0.434	1.42e-54	5	CYR61	NC
MIR99AHG1	2.62e-106	1.09345	0.942	0.383	5.08e-102	5	MIR99AHG	NC
NFKBIZ1	2.06e-103	1.09006	0.82	0.262	4e-99	5	NFKBIZ	NC
CALD12	4.09e-84	1.08671	0.993	0.533	7.94e-80	5	CALD1	NC
IGFBP53	4.42e-59	1.05747	0.939	0.525	8.58e-55	5	IGFBP5	NC
PDGFRB	5.26e-95	1.05509	0.786	0.248	1.02e-90	5	PDGFRB	NC
VCAN2	3.7e-77	1.04013	0.953	0.438	7.19e-73	5	VCAN	NC
FOS3	8.05e-59	1.03986	0.993	0.696	1.56e-54	5	FOS	NC
FRZB	7.25e-83	1.03235	0.739	0.233	1.41e-78	5	FRZB	NC
ALDH1A2	2.84e-213	1.01936	0.637	0.07	5.52e-209	5	ALDH1A2	NC
H3F3B2	1.82e-71	1.0137	0.997	0.961	3.54e-67	5	H3F3B	NC
MAGED23	2.35e-80	1.00766	0.99	0.679	4.57e-76	5	MAGED2	NC
IRF1	1.32e-95	0.994038	0.756	0.231	2.56e-91	5	IRF1	NC
SERPINE21	2.52e-100	0.991622	0.895	0.316	4.89e-96	5	SERPINE2	NC
GPM6B	1.94e-76	0.975353	0.797	0.297	3.78e-72	5	GPM6B	NC
HES11	4.32e-89	0.971947	0.949	0.385	8.39e-85	5	HES1	NC
TUSC31	8.99e-87	0.971646	0.949	0.446	1.75e-82	5	TUSC3	NC
PHLDA1	5.09e-108	0.962936	0.705	0.176	9.88e-104	5	PHLDA1	NC
CDC42EP52	6.17e-83	0.957914	0.946	0.402	1.2e-78	5	CDC42EP5	NC
EGR12	2.8e-67	0.956287	0.966	0.483	5.44e-63	5	EGR1	NC
THY1	3.34e-51	0.951534	0.603	0.223	6.48e-47	5	THY1	NC
STAT31	4.75e-83	0.944657	0.895	0.402	9.22e-79	5	STAT3	NC
S100A114	1.97e-65	0.927534	0.98	0.539	3.83e-61	5	S100A11	NC
PCDH181	8.29e-60	0.923405	0.81	0.333	1.61e-55	5	PCDH18	NC
DSTN1	1.77e-67	0.918088	0.973	0.677	3.44e-63	5	DSTN	NC
PRSS231	1.18e-83	0.906837	0.834	0.285	2.29e-79	5	PRSS23	NC
NR3C11	9.2e-93	0.905456	0.831	0.297	1.79e-88	5	NR3C1	NC
HLA-E	2.17e-96	0.90439	0.827	0.278	4.22e-92	5	HLA-E	NC
GEM1	1.26e-104	0.900227	0.671	0.166	2.44e-100	5	GEM	NC
CCNL1	8.85e-66	0.888315	0.922	0.464	1.72e-61	5	CCNL1	NC
COTL1	2.37e-76	0.872639	0.939	0.418	4.6e-72	5	COTL1	NC
HHIP	9.43e-153	0.871068	0.553	0.073	1.83e-148	5	HHIP	NC
RARB1	5.09e-130	0.86003	0.78	0.19	9.88e-126	5	RARB	NC
MTCH11	3.08e-49	0.858107	0.956	0.66	5.98e-45	5	MTCH1	NC
SDC21	4e-83	0.855644	0.919	0.371	7.76e-79	5	SDC2	NC
EVA1B1	5.1e-78	0.846401	0.919	0.4	9.91e-74	5	EVA1B	NC
MCAM	5.68e-98	0.840549	0.614	0.141	1.1e-93	5	MCAM	NC
ZFP36L11	8.96e-51	0.829728	0.983	0.599	1.74e-46	5	ZFP36L1	NC
SOCS11	4.53e-83	0.822703	0.783	0.268	8.79e-79	5	SOCS1	NC
RAB341	3.11e-70	0.821757	0.946	0.457	6.04e-66	5	RAB34	NC
ATF3	9.08e-94	0.816666	0.837	0.265	1.76e-89	5	ATF3	NC
ZFP36L21	2.69e-49	0.813983	0.973	0.622	5.22e-45	5	ZFP36L2	NC
ACTG12	7.4e-73	0.803908	1	0.975	1.44e-68	5	ACTG1	NC
XBP11	7.82e-69	0.803483	0.861	0.384	1.52e-64	5	XBP1	NC
CD248	2.65e-107	0.802437	0.797	0.226	5.16e-103	5	CD248	NC
EPHA31	6.4e-104	0.797874	0.6	0.129	1.24e-99	5	EPHA3	NC
LITAF1	6.96e-77	0.792827	0.854	0.338	1.35e-72	5	LITAF	NC
MEST2	3.32e-55	0.781738	0.956	0.535	6.44e-51	5	MEST	NC
PIEZO21	2.52e-93	0.778827	0.749	0.222	4.89e-89	5	PIEZO2	NC
IL11RA3	5.79e-56	0.773188	0.929	0.434	1.12e-51	5	IL11RA	NC
CDH112	1.66e-69	0.76848	0.919	0.395	3.21e-65	5	CDH11	NC
CTSK3	1.18e-69	0.768342	0.912	0.375	2.3e-65	5	CTSK	NC
LAPTM4A3	9.6e-55	0.767567	0.997	0.656	1.86e-50	5	LAPTM4A	NC
LGI1	1.5e-157	0.765791	0.437	0.041	2.91e-153	5	LGI1	NC
GADD45B1	2.49e-63	0.758503	0.885	0.413	4.83e-59	5	GADD45B	NC
HEY1	5.96e-115	0.751731	0.58	0.104	1.16e-110	5	HEY1	NC
FST1	4.77e-73	0.751178	0.641	0.191	9.26e-69	5	FST	NC
TIMP12	6.59e-59	0.750102	0.959	0.506	1.28e-54	5	TIMP1	NC
TMSB4X1	5.12e-49	0.742224	1	0.923	9.93e-45	5	TMSB4X	NC
PGF	2.11e-109	0.740974	0.617	0.13	4.1e-105	5	PGF	NC
MXRA82	1.17e-66	0.736574	0.922	0.412	2.27e-62	5	MXRA8	NC
NNAT2	1.24e-46	0.733038	0.824	0.4	2.41e-42	5	NNAT	NC
LAMB1	1.26e-82	0.729442	0.827	0.29	2.44e-78	5	LAMB1	NC
HSP90B1	2.96e-46	0.728252	0.99	0.639	5.75e-42	5	HSP90B1	NC
NOTCH3	4.31e-88	0.716165	0.607	0.149	8.38e-84	5	NOTCH3	NC
FAM110B	7.89e-90	0.715888	0.725	0.215	1.53e-85	5	FAM110B	NC
MEG33	2.61e-40	0.714847	0.963	0.52	5.06e-36	5	MEG3	NC
PRRX22	8.25e-50	0.713076	0.773	0.343	1.6e-45	5	PRRX2	NC
DUSP2	2.19e-44	0.712683	0.247	0.049	4.24e-40	5	DUSP2	NC
LMO42	2e-40	0.701424	0.908	0.533	3.88e-36	5	LMO4	NC
TIMP3	3.6e-37	0.700044	0.78	0.394	6.99e-33	5	TIMP3	NC
TFPI	1.59e-111	0.696152	0.458	0.067	3.09e-107	5	TFPI	NC
FBN22	1.66e-65	0.690379	0.908	0.393	3.22e-61	5	FBN2	NC
SLC9A3R2	2.09e-82	0.690207	0.776	0.265	4.05e-78	5	SLC9A3R2	NC
IER21	2.35e-35	0.68879	0.959	0.585	4.57e-31	5	IER2	NC
DUSP12	8.56e-36	0.686757	0.932	0.558	1.66e-31	5	DUSP1	NC
SPATS2L	2.44e-69	0.683896	0.844	0.329	4.75e-65	5	SPATS2L	NC
MYH10	1.14e-55	0.675	0.878	0.428	2.2e-51	5	MYH10	NC
GUCY1A1	1.39e-92	0.674133	0.492	0.095	2.69e-88	5	GUCY1A1	NC
ISYNA1	1.41e-53	0.670271	0.858	0.4	2.74e-49	5	ISYNA1	NC
KRT8	1.08e-71	0.669461	0.742	0.26	2.09e-67	5	KRT8	NC
CIRBP1	3.32e-53	0.662337	0.997	0.858	6.46e-49	5	CIRBP	NC
MDFI2	3.39e-62	0.661186	0.871	0.371	6.57e-58	5	MDFI	NC
MCL11	2.16e-65	0.659947	0.831	0.347	4.2e-61	5	MCL1	NC
TSC22D12	6.82e-35	0.65948	0.946	0.63	1.32e-30	5	TSC22D1	NC
CALR1	8.43e-40	0.655213	0.99	0.736	1.64e-35	5	CALR	NC
CARMN	3.53e-123	0.653723	0.464	0.063	6.85e-119	5	CARMN	NC
PITX22	1.31e-56	0.650103	0.885	0.366	2.54e-52	5	PITX2	NC
RND1	2.68e-99	0.649828	0.458	0.077	5.2e-95	5	RND1	NC
MYL91	3.01e-69	0.64785	0.81	0.301	5.84e-65	5	MYL9	NC
A2M	1.14e-42	0.645111	0.173	0.024	2.21e-38	5	A2M	NC
EFNB1	4.59e-71	0.644869	0.681	0.223	8.91e-67	5	EFNB1	NC
AES	1.19e-52	0.643282	0.946	0.518	2.31e-48	5	AES	NC
SNAI2	2.85e-76	0.642634	0.607	0.17	5.54e-72	5	SNAI2	NC
COL8A23	2.12e-62	0.641318	0.678	0.243	4.12e-58	5	COL8A2	NC
EPB41L2	1.17e-60	0.638878	0.814	0.331	2.28e-56	5	EPB41L2	NC
EMILIN12	5.23e-66	0.63156	0.919	0.387	1.02e-61	5	EMILIN1	NC
NPM11	5.35e-50	0.62909	0.997	0.913	1.04e-45	5	NPM1	NC
CSRNP1	7.87e-86	0.627534	0.671	0.191	1.53e-81	5	CSRNP1	NC
FAM133B	2.32e-50	0.625274	0.841	0.414	4.51e-46	5	FAM133B	NC
TNFRSF1A	2.37e-72	0.624163	0.719	0.244	4.6e-68	5	TNFRSF1A	NC
DMKN	4.79e-75	0.621485	0.651	0.198	9.31e-71	5	DMKN	NC
VMP1	1.63e-49	0.621202	0.786	0.371	3.17e-45	5	VMP1	NC
2003-06-01	2.52e-32	0.620594	0.98	0.697	4.89e-28	5	JUN	NC
NTNG1	8.13e-101	0.619615	0.525	0.101	1.58e-96	5	NTNG1	NC
C12orf57	4.96e-40	0.618613	0.966	0.635	9.63e-36	5	C12orf57	NC
SOX41	2.83e-36	0.617964	0.99	0.653	5.49e-32	5	SOX4	NC
ALKAL2	3.41e-167	0.617916	0.41	0.031	6.63e-163	5	ALKAL2	NC
KCNQ1OT13	1.44e-37	0.614698	0.966	0.545	2.79e-33	5	KCNQ1OT1	NC
TPM11	3.29e-45	0.612993	0.953	0.531	6.39e-41	5	TPM1	NC
HIST1H2AC2	3.65e-33	0.611356	0.763	0.392	7.1e-29	5	HIST1H2AC	NC
BEX31	4.66e-42	0.610375	0.986	0.739	9.05e-38	5	BEX3	NC
COL25A1	6.19e-88	0.610143	0.549	0.123	1.2e-83	5	COL25A1	NC
IFITM2	3.14e-81	0.608476	0.729	0.222	6.1e-77	5	IFITM2	NC
CPED12	3.29e-58	0.607811	0.817	0.335	6.4e-54	5	CPED1	NC
PCP4	2.99e-44	0.604586	0.441	0.132	5.8e-40	5	PCP4	NC
SCIN	1.01e-132	0.60374	0.468	0.06	1.96e-128	5	SCIN	NC
JUND1	1.29e-32	0.599803	0.973	0.73	2.5e-28	5	JUND	NC
DNPH1	3.03e-63	0.599379	0.8	0.332	5.88e-59	5	DNPH1	NC
ITIH5	1.06e-25	0.593616	0.149	0.03	2.07e-21	5	ITIH5	NC
FOXP13	2.27e-42	0.587885	0.925	0.484	4.4e-38	5	FOXP1	NC
CTBP2	1.5e-49	0.585604	0.831	0.42	2.9e-45	5	CTBP2	NC
ANXA23	4.16e-38	0.584923	0.986	0.631	8.08e-34	5	ANXA2	NC
ITGB11	1.04e-45	0.583938	0.973	0.534	2.01e-41	5	ITGB1	NC
NME41	1.69e-41	0.583408	0.861	0.469	3.28e-37	5	NME4	NC
FOSB2	1.38e-22	0.581572	0.722	0.396	2.68e-18	5	FOSB	NC
RGS161	2.47e-53	0.580348	0.444	0.119	4.79e-49	5	RGS16	NC
HNRNPA11	7.23e-43	0.577338	1	0.916	1.4e-38	5	HNRNPA1	NC
FOXF2	2.64e-141	0.575449	0.539	0.073	5.12e-137	5	FOXF2	NC
GNAS	3.5e-42	0.575252	0.993	0.814	6.81e-38	5	GNAS	NC
DMD	1.84e-102	0.574846	0.454	0.074	3.57e-98	5	DMD	NC
JAG1	4.46e-94	0.574509	0.539	0.109	8.66e-90	5	JAG1	NC
ATP5MC21	1.23e-41	0.573805	0.997	0.775	2.39e-37	5	ATP5MC2	NC
CNN32	5.23e-36	0.569646	0.983	0.639	1.02e-31	5	CNN3	NC
OSTC2	9.65e-38	0.567601	0.983	0.655	1.87e-33	5	OSTC	NC
PFN21	1.29e-43	0.567447	0.885	0.456	2.5e-39	5	PFN2	NC
SNHG181	2.55e-53	0.565412	0.807	0.343	4.96e-49	5	SNHG18	NC
IL6ST	1.15e-63	0.559129	0.753	0.288	2.23e-59	5	IL6ST	NC
FCGRT3	3.19e-51	0.557056	0.932	0.411	6.19e-47	5	FCGRT	NC
CAMTA1	7.13e-46	0.556703	0.908	0.52	1.38e-41	5	CAMTA1	NC
AIG11	6.43e-57	0.554163	0.719	0.282	1.25e-52	5	AIG1	NC
CCL2	3.04e-16	0.552004	0.244	0.096	5.9e-12	5	CCL2	NC
FGFR21	9.23e-74	0.550235	0.695	0.212	1.79e-69	5	FGFR2	NC
AMOTL2	5.8e-58	0.550098	0.627	0.219	1.13e-53	5	AMOTL2	NC
MFAP43	5.55e-36	0.549291	0.864	0.429	1.08e-31	5	MFAP4	NC
MRPS6	1.68e-34	0.548743	0.912	0.626	3.26e-30	5	MRPS6	NC
OAF	5.23e-61	0.547928	0.695	0.248	1.02e-56	5	OAF	NC
CD992	6.89e-40	0.546809	0.929	0.485	1.34e-35	5	CD99	NC
CLDN11	1.13e-93	0.546101	0.376	0.053	2.19e-89	5	CLDN11	NC
HSP90AA11	1.13e-31	0.546066	1	0.926	2.2e-27	5	HSP90AA1	NC
IFITM1	1.47e-59	0.545557	0.217	0.028	2.86e-55	5	IFITM1	NC
SLC5A3	1.1e-47	0.544757	0.742	0.329	2.13e-43	5	SLC5A3	NC
CDC42EP4	8.05e-46	0.542976	0.695	0.302	1.56e-41	5	CDC42EP4	NC
COL18A1	3.38e-16	0.539596	0.515	0.278	6.56e-12	5	COL18A1	NC
MAP1LC3A	2.55e-53	0.538035	0.807	0.358	4.94e-49	5	MAP1LC3A	NC
MDK3	4.62e-27	0.532311	0.997	0.775	8.96e-23	5	MDK	NC
SFRP1	1.43e-44	0.532289	0.607	0.231	2.79e-40	5	SFRP1	NC
KLF10	4.74e-55	0.531925	0.654	0.238	9.2e-51	5	KLF10	NC
APP3	5.11e-38	0.530508	0.983	0.566	9.93e-34	5	APP	NC
SERTAD1	1.47e-56	0.528957	0.844	0.385	2.85e-52	5	SERTAD1	NC
OLFML33	1.38e-47	0.528031	0.861	0.365	2.68e-43	5	OLFML3	NC
NDN2	2.44e-41	0.527046	0.946	0.481	4.73e-37	5	NDN	NC
STOM	1.48e-61	0.525184	0.692	0.246	2.87e-57	5	STOM	NC
EFEMP22	1.88e-47	0.52418	0.854	0.382	3.64e-43	5	EFEMP2	NC
TPM4	1.47e-42	0.523663	0.922	0.468	2.86e-38	5	TPM4	NC
HSPA1A	3.97e-33	0.52333	0.99	0.771	7.72e-29	5	HSPA1A	NC
RPS82	5.91e-41	0.521736	1	0.993	1.15e-36	5	RPS8	NC
BTG2	2.99e-43	0.519643	0.814	0.419	5.8e-39	5	BTG2	NC
ETFB	1.61e-43	0.514334	0.841	0.439	3.12e-39	5	ETFB	NC
RPL152	2.74e-42	0.514055	1	0.985	5.33e-38	5	RPL15	NC
CLMP2	1.09e-51	0.512023	0.705	0.274	2.12e-47	5	CLMP	NC
FKBP103	5.62e-44	0.511405	0.919	0.445	1.09e-39	5	FKBP10	NC
NID2	1.32e-57	0.510805	0.573	0.181	2.57e-53	5	NID2	NC
SH3BGRL1	8.7e-36	0.5091	0.922	0.54	1.69e-31	5	SH3BGRL	NC
MYLIP	1.58e-55	0.507391	0.614	0.213	3.08e-51	5	MYLIP	NC
RBP1	4.03e-37	0.506667	0.969	0.604	7.82e-33	5	RBP1	NC
QPRT	5.38e-59	0.506578	0.851	0.35	1.04e-54	5	QPRT	NC
TMEM205	1.41e-59	0.504782	0.698	0.26	2.75e-55	5	TMEM205	NC
SERPINH12	4.77e-47	0.502949	0.902	0.433	9.26e-43	5	SERPINH1	NC
IFI16	6.96e-94	0.502805	0.349	0.045	1.35e-89	5	IFI16	NC
TPD52L1	2.08e-58	0.502594	0.566	0.175	4.05e-54	5	TPD52L1	NC
SLC25A3	2.87e-35	0.500908	0.99	0.794	5.56e-31	5	SLC25A3	NC
2007-09-01	1.37e-31	0.500314	0.986	0.687	2.67e-27	5	2007-09-01	NC
SNHG25	1.23e-200	4.36465	0.938	0.313	2.39e-196	6	SNHG25	red blood cells
RPS27L	1.74e-149	3.70615	0.965	0.612	3.38e-145	6	RPS27L	red blood cells
AL118516.1	1.19e-226	3.69342	0.869	0.189	2.3e-222	6	AL118516.1	red blood cells
GADD45A	6.51e-143	3.68951	0.91	0.437	1.26e-138	6	GADD45A	red blood cells
TRIAP1	1.41e-168	3.61195	0.81	0.226	2.73e-164	6	TRIAP1	red blood cells
SNHG12	2.34e-182	3.296	0.73	0.145	4.55e-178	6	SNHG12	red blood cells
MAP1LC3B	1.67e-169	3.28408	0.972	0.523	3.24e-165	6	MAP1LC3B	red blood cells
SOD1	7.7e-165	3.2303	0.997	0.814	1.5e-160	6	SOD1	red blood cells
FTL	9.72e-150	3.09723	1	0.969	1.89e-145	6	FTL	red blood cells
SNHG9	8.3e-134	2.97636	0.872	0.408	1.61e-129	6	SNHG9	red blood cells
CDKN1A	1.17e-204	2.95262	0.727	0.117	2.28e-200	6	CDKN1A	red blood cells
S100A6	3.47e-71	2.84246	0.824	0.626	6.74e-67	6	S100A6	red blood cells
THUMPD3-AS1	1.79e-127	2.7991	0.785	0.285	3.48e-123	6	THUMPD3-AS1	red blood cells
PLIN2	1.5e-80	2.78479	0.716	0.357	2.91e-76	6	PLIN2	red blood cells
HMOX1	2.03e-162	2.77126	0.609	0.092	3.95e-158	6	HMOX1	red blood cells
SQSTM1	8.62e-99	2.69856	0.81	0.41	1.67e-94	6	SQSTM1	red blood cells
DDIT3	1.08e-128	2.68197	0.754	0.244	2.1e-124	6	DDIT3	red blood cells
GDF15	8.29e-205	2.6646	0.685	0.093	1.61e-200	6	GDF15	red blood cells
GADD45G1	3.03e-70	2.62521	0.543	0.178	5.89e-66	6	GADD45G	red blood cells
BAX	2.13e-135	2.61439	0.882	0.416	4.13e-131	6	BAX	red blood cells
RPL36AL	2.61e-145	2.5721	0.979	0.767	5.06e-141	6	RPL36AL	red blood cells
SLC38A2	1.66e-75	2.52536	0.758	0.427	3.22e-71	6	SLC38A2	red blood cells
CSKMT	6.11e-89	2.52146	0.606	0.201	1.19e-84	6	CSKMT	red blood cells
HIST1H4H	3.56e-145	2.50307	0.405	0.041	6.92e-141	6	HIST1H4H	red blood cells
TUBA4A	2.26e-196	2.50003	0.675	0.094	4.39e-192	6	TUBA4A	red blood cells
DNAJA1	6.4e-115	2.49572	0.934	0.724	1.24e-110	6	DNAJA1	red blood cells
TMA7	1.44e-144	2.45601	0.997	0.839	2.79e-140	6	TMA7	red blood cells
FTH1	6.33e-149	2.40162	1	0.985	1.23e-144	6	FTH1	red blood cells
EIF1	5.22e-169	2.39671	1	0.953	1.01e-164	6	EIF1	red blood cells
NEAT1	1.33e-85	2.38572	0.796	0.413	2.58e-81	6	NEAT1	red blood cells
AC026979.2	1.11e-215	2.38285	0.654	0.084	2.15e-211	6	AC026979.2	red blood cells
BBC3	3.54e-197	2.30998	0.619	0.078	6.87e-193	6	BBC3	red blood cells
ISCU	1.66e-87	2.26951	0.803	0.498	3.23e-83	6	ISCU	red blood cells
SMIM4	2.97e-126	2.25566	0.664	0.177	5.78e-122	6	SMIM4	red blood cells
ZFAS1	1.06e-99	2.24285	0.972	0.823	2.06e-95	6	ZFAS1	red blood cells
TUBB4B1	7.56e-89	2.23077	0.886	0.614	1.47e-84	6	TUBB4B	red blood cells
ELOC	5.81e-75	2.19805	0.779	0.526	1.13e-70	6	ELOC	red blood cells
CKS2	1.32e-81	2.19704	0.751	0.345	2.57e-77	6	CKS2	red blood cells
ATP5MF	3.22e-122	2.16713	0.941	0.704	6.25e-118	6	ATP5MF	red blood cells
STK17A	1.55e-151	2.16712	0.685	0.143	3e-147	6	STK17A	red blood cells
UBC	8.71e-95	2.1655	0.979	0.881	1.69e-90	6	UBC	red blood cells
DYNLL1	2.23e-73	2.14155	0.924	0.844	4.34e-69	6	DYNLL1	red blood cells
IFT20	1.1e-101	2.12219	0.792	0.382	2.14e-97	6	IFT20	red blood cells
SNRPG1	1.82e-86	2.0735	0.872	0.617	3.54e-82	6	SNRPG	red blood cells
BLOC1S2	2.02e-91	2.06431	0.682	0.262	3.92e-87	6	BLOC1S2	red blood cells
EMC6	2.18e-108	2.06317	0.785	0.344	4.23e-104	6	EMC6	red blood cells
SAP181	1.76e-91	2.05642	0.91	0.736	3.42e-87	6	SAP18	red blood cells
RBX1	3.52e-76	2.05218	0.879	0.708	6.84e-72	6	RBX1	red blood cells
SNHG10	2.3e-90	2.03605	0.533	0.136	4.46e-86	6	SNHG10	red blood cells
PFDN2	9e-98	2.03128	0.875	0.591	1.75e-93	6	PFDN2	red blood cells
PPP1R15A	2.62e-56	2.02739	0.727	0.507	5.08e-52	6	PPP1R15A	red blood cells
SELENOK	6.2e-71	2.01113	0.803	0.567	1.2e-66	6	SELENOK	red blood cells
SP6	1.19e-242	2.00373	0.429	0.019	2.32e-238	6	SP6	red blood cells
S100A4	1.69e-53	2.00012	0.685	0.393	3.28e-49	6	S100A4	red blood cells
MAPKAPK5-AS1	2.85e-84	1.99898	0.633	0.237	5.53e-80	6	MAPKAPK5-AS1	red blood cells
MDM2	1.87e-76	1.99574	0.536	0.167	3.63e-72	6	MDM2	red blood cells
CITED2	3.76e-38	1.99042	0.644	0.454	7.29e-34	6	CITED2	red blood cells
EIF1B	1.26e-62	1.9688	0.837	0.699	2.46e-58	6	EIF1B	red blood cells
OSER1	5.28e-73	1.96476	0.64	0.282	1.03e-68	6	OSER1	red blood cells
NDUFV3	6.6e-81	1.95329	0.803	0.514	1.28e-76	6	NDUFV3	red blood cells
SERTAD11	4.92e-41	1.94621	0.626	0.4	9.55e-37	6	SERTAD1	red blood cells
MT1H	2.5e-41	1.92568	0.481	0.169	4.85e-37	6	MT1H	red blood cells
EIF51	2.85e-95	1.91959	0.862	0.526	5.54e-91	6	EIF5	red blood cells
HSPE1	2.56e-17	1.91701	0.689	0.694	4.96e-13	6	HSPE1	red blood cells
MT2A	2.43e-36	1.88392	0.571	0.267	4.71e-32	6	MT2A	red blood cells
NOP10	1.37e-58	1.87005	0.768	0.544	2.66e-54	6	NOP10	red blood cells
KMT2E-AS1	7.22e-114	1.85926	0.519	0.102	1.4e-109	6	KMT2E-AS1	red blood cells
BTG21	3.94e-49	1.84544	0.678	0.429	7.64e-45	6	BTG2	red blood cells
UBL5	1.59e-110	1.82699	0.952	0.8	3.08e-106	6	UBL5	red blood cells
ATF31	3.88e-27	1.80531	0.491	0.288	7.54e-23	6	ATF3	red blood cells
TRAPPC2B	5.15e-100	1.79802	0.599	0.169	1e-95	6	TRAPPC2B	red blood cells
AC008875.1	7.15e-201	1.78314	0.391	0.021	1.39e-196	6	AC008875.1	red blood cells
MAGOH	3.15e-39	1.77974	0.644	0.455	6.12e-35	6	MAGOH	red blood cells
CALM21	2.16e-51	1.77369	0.893	0.872	4.2e-47	6	CALM2	red blood cells
UBE2B	2.29e-53	1.76724	0.74	0.552	4.45e-49	6	UBE2B	red blood cells
AP002360.1	2.82e-95	1.75103	0.526	0.128	5.47e-91	6	AP002360.1	red blood cells
CYCS1	3.34e-50	1.73452	0.702	0.476	6.49e-46	6	CYCS	red blood cells
HEXIM1	1.45e-55	1.73445	0.529	0.216	2.82e-51	6	HEXIM1	red blood cells
PSMD8	1.71e-85	1.73408	0.862	0.679	3.32e-81	6	PSMD8	red blood cells
COX7B	3.79e-48	1.73408	0.772	0.677	7.37e-44	6	COX7B	red blood cells
OAZ1	6.96e-83	1.70793	0.913	0.786	1.35e-78	6	OAZ1	red blood cells
ISCA1	1.93e-50	1.69387	0.637	0.373	3.75e-46	6	ISCA1	red blood cells
SUPT4H1	3.41e-71	1.69146	0.785	0.509	6.63e-67	6	SUPT4H1	red blood cells
ARIH2OS	5.28e-80	1.68871	0.46	0.112	1.02e-75	6	ARIH2OS	red blood cells
CHCHD7	5.08e-38	1.68361	0.529	0.286	9.87e-34	6	CHCHD7	red blood cells
ATP5F1E	1.07e-98	1.67255	0.986	0.912	2.08e-94	6	ATP5F1E	red blood cells
MRPS61	6.24e-60	1.67042	0.834	0.632	1.21e-55	6	MRPS6	red blood cells
MTURN	9.48e-67	1.66887	0.609	0.236	1.84e-62	6	MTURN	red blood cells
PHF5A	3.87e-63	1.66622	0.633	0.306	7.52e-59	6	PHF5A	red blood cells
AC020910.4	5.02e-156	1.66449	0.46	0.051	9.75e-152	6	AC020910.4	red blood cells
AP002478.1	2.29e-209	1.65095	0.325	0.01	4.45e-205	6	AP002478.1	red blood cells
UBB	7.11e-110	1.64931	0.99	0.911	1.38e-105	6	UBB	red blood cells
COX6A1	4.03e-102	1.64295	0.927	0.737	7.82e-98	6	COX6A1	red blood cells
CYTOR	2.21e-92	1.62464	0.581	0.151	4.29e-88	6	CYTOR	red blood cells
ORMDL2	1.11e-83	1.62146	0.54	0.155	2.16e-79	6	ORMDL2	red blood cells
AL121944.1	1.69e-152	1.60615	0.412	0.039	3.28e-148	6	AL121944.1	red blood cells
SF3B61	3.03e-53	1.60236	0.837	0.702	5.88e-49	6	SF3B6	red blood cells
GCC2	7.58e-41	1.59539	0.599	0.356	1.47e-36	6	GCC2	red blood cells
ARF4	2.19e-55	1.58907	0.803	0.642	4.25e-51	6	ARF4	red blood cells
MANF	5.48e-49	1.55846	0.671	0.411	1.06e-44	6	MANF	red blood cells
VPS26C	3.44e-56	1.554	0.484	0.175	6.68e-52	6	VPS26C	red blood cells
IDI1	2.87e-31	1.55165	0.519	0.297	5.58e-27	6	IDI1	red blood cells
GTF2A2	1.73e-39	1.54363	0.702	0.555	3.35e-35	6	GTF2A2	red blood cells
AC091271.1	7.53e-68	1.54338	0.394	0.093	1.46e-63	6	AC091271.1	red blood cells
MRPL36	1.59e-49	1.54033	0.606	0.331	3.1e-45	6	MRPL36	red blood cells
COX14	6.27e-50	1.53708	0.626	0.362	1.22e-45	6	COX14	red blood cells
MIR22HG	3.32e-81	1.52559	0.464	0.112	6.45e-77	6	MIR22HG	red blood cells
MRPL32	6.09e-48	1.51042	0.606	0.337	1.18e-43	6	MRPL32	red blood cells
DDX3X	1.08e-34	1.50969	0.678	0.52	2.09e-30	6	DDX3X	red blood cells
AMD1	4.92e-34	1.50584	0.602	0.407	9.56e-30	6	AMD1	red blood cells
ZBTB8OS	1.63e-69	1.50473	0.536	0.182	3.16e-65	6	ZBTB8OS	red blood cells
FBXO221	1.18e-27	1.49045	0.471	0.269	2.29e-23	6	FBXO22	red blood cells
TAF1D	5.05e-23	1.48828	0.585	0.473	9.8e-19	6	TAF1D	red blood cells
CD55	8.3e-73	1.485	0.453	0.115	1.61e-68	6	CD55	red blood cells
DCXR	9.96e-47	1.48404	0.678	0.454	1.93e-42	6	DCXR	red blood cells
PET100	5.34e-47	1.48116	0.709	0.507	1.04e-42	6	PET100	red blood cells
ENY2	5.6e-27	1.47909	0.671	0.59	1.09e-22	6	ENY2	red blood cells
ATP6V0E1	5.06e-44	1.47879	0.727	0.564	9.83e-40	6	ATP6V0E1	red blood cells
YPEL5	3.47e-36	1.46874	0.616	0.403	6.74e-32	6	YPEL5	red blood cells
TAF12	7.08e-40	1.4668	0.547	0.301	1.38e-35	6	TAF12	red blood cells
PAIP2	1.41e-39	1.45767	0.74	0.606	2.74e-35	6	PAIP2	red blood cells
BLVRB	1.44e-47	1.45443	0.765	0.515	2.8e-43	6	BLVRB	red blood cells
NDUFA61	1.05e-48	1.45371	0.734	0.557	2.03e-44	6	NDUFA6	red blood cells
NXT1	6.42e-40	1.45225	0.561	0.316	1.25e-35	6	NXT1	red blood cells
UBE2S1	6e-43	1.44677	0.758	0.555	1.17e-38	6	UBE2S	red blood cells
SESN1	1.34e-49	1.44621	0.294	0.067	2.6e-45	6	SESN1	red blood cells
ELOB	1.52e-99	1.44347	0.962	0.817	2.95e-95	6	ELOB	red blood cells
NDUFB1	3.27e-30	1.43592	0.699	0.598	6.34e-26	6	NDUFB1	red blood cells
MRPL20	1.9e-26	1.43079	0.602	0.488	3.7e-22	6	MRPL20	red blood cells
SLC2A1	1.89e-41	1.4304	0.706	0.454	3.67e-37	6	SLC2A1	red blood cells
AC016394.1	1.63e-105	1.42938	0.36	0.046	3.17e-101	6	AC016394.1	red blood cells
NDUFA2	2.9e-57	1.4224	0.768	0.569	5.63e-53	6	NDUFA2	red blood cells
CRIPT	1.04e-29	1.42022	0.512	0.311	2.02e-25	6	CRIPT	red blood cells
LINC02001	2.03e-58	1.41539	0.446	0.137	3.94e-54	6	LINC02001	red blood cells
AP000769.2	1.52e-188	1.41523	0.291	0.009	2.96e-184	6	AP000769.2	red blood cells
TRMT112	5.17e-63	1.40798	0.858	0.715	1e-58	6	TRMT112	red blood cells
MITD1	6.31e-20	1.40333	0.353	0.186	1.22e-15	6	MITD1	red blood cells
CCDC59	1.98e-26	1.39943	0.533	0.363	3.84e-22	6	CCDC59	red blood cells
SNHG19	9.95e-52	1.39492	0.446	0.153	1.93e-47	6	SNHG19	red blood cells
RPP25L	1.7e-48	1.38496	0.491	0.201	3.3e-44	6	RPP25L	red blood cells
SRSF2	4.46e-19	1.37893	0.668	0.627	8.66e-15	6	SRSF2	red blood cells
HNRNPH3	9.59e-22	1.37557	0.713	0.678	1.86e-17	6	HNRNPH3	red blood cells
DPM1	2.73e-25	1.37466	0.467	0.285	5.3e-21	6	DPM1	red blood cells
PLCG2	5.83e-06	1.37207	0.28	0.217	0.113158	6	PLCG2	red blood cells
AC015912.3	8.3e-84	1.35924	0.194	0.014	1.61e-79	6	AC015912.3	red blood cells
BAG1	4.75e-42	1.35631	0.633	0.38	9.22e-38	6	BAG1	red blood cells
RNF114	1.16e-33	1.34579	0.574	0.376	2.26e-29	6	RNF114	red blood cells
CTNNAL1	4.04e-30	1.34272	0.522	0.311	7.84e-26	6	CTNNAL1	red blood cells
ILF3-DT	3.78e-32	1.34216	0.516	0.298	7.33e-28	6	ILF3-DT	red blood cells
AL139246.5	4.41e-115	1.33975	0.381	0.045	8.57e-111	6	AL139246.5	red blood cells
JPT11	1.01e-28	1.32712	0.723	0.595	1.97e-24	6	JPT1	red blood cells
CALM11	8.54e-24	1.32563	0.72	0.674	1.66e-19	6	CALM1	red blood cells
TBPL1	6.11e-14	1.3221	0.37	0.246	1.19e-09	6	TBPL1	red blood cells
FDXR	8.76e-56	1.32088	0.346	0.081	1.7e-51	6	FDXR	red blood cells
C19orf53	2.38e-48	1.31655	0.779	0.666	4.63e-44	6	C19orf53	red blood cells
HSPB11	2.81e-28	1.31406	0.547	0.359	5.47e-24	6	HSPB11	red blood cells
PCGF5	2.38e-59	1.31162	0.488	0.158	4.62e-55	6	PCGF5	red blood cells
SRSF31	3.28e-27	1.30975	0.81	0.763	6.37e-23	6	SRSF3	red blood cells
PSMA7	6.96e-56	1.30914	0.837	0.752	1.35e-51	6	PSMA7	red blood cells
YPEL4	6.55e-90	1.30629	0.422	0.076	1.27e-85	6	YPEL4	red blood cells
AC009403.1	7.73e-78	1.29608	0.367	0.068	1.5e-73	6	AC009403.1	red blood cells
PITHD1	1.25e-30	1.29418	0.564	0.372	2.42e-26	6	PITHD1	red blood cells
AC027644.3	4.99e-47	1.29096	0.491	0.205	9.69e-43	6	AC027644.3	red blood cells
URB1-AS1	1.53e-62	1.28854	0.37	0.087	2.98e-58	6	URB1-AS1	red blood cells
RPA3	1.72e-32	1.28782	0.536	0.302	3.34e-28	6	RPA3	red blood cells
H2AFX	2.58e-25	1.28279	0.543	0.348	5e-21	6	H2AFX	red blood cells
PFDN6	9.39e-40	1.28029	0.488	0.227	1.82e-35	6	PFDN6	red blood cells
ATP5MC1	3.32e-25	1.28013	0.588	0.473	6.45e-21	6	ATP5MC1	red blood cells
SNU13	2.23e-49	1.27855	0.806	0.685	4.33e-45	6	SNU13	red blood cells
RPAIN	1.1e-28	1.27655	0.609	0.455	2.14e-24	6	RPAIN	red blood cells
SLIRP	1.23e-32	1.27227	0.664	0.528	2.39e-28	6	SLIRP	red blood cells
ATF4	1.22e-33	1.2717	0.685	0.556	2.36e-29	6	ATF4	red blood cells
SRSF71	5.06e-11	1.27066	0.657	0.647	9.83e-07	6	SRSF7	red blood cells
PITPNA-AS1	2.58e-38	1.26905	0.481	0.229	5.02e-34	6	PITPNA-AS1	red blood cells
ISG20	9.57e-184	1.2678	0.339	0.016	1.86e-179	6	ISG20	red blood cells
UBALD1	2.04e-61	1.2627	0.408	0.106	3.96e-57	6	UBALD1	red blood cells
YPEL3	4.07e-33	1.25951	0.64	0.444	7.9e-29	6	YPEL3	red blood cells
TSGA10	8.72e-40	1.25902	0.266	0.066	1.69e-35	6	TSGA10	red blood cells
NCBP2-AS2	6.61e-46	1.25683	0.484	0.2	1.28e-41	6	NCBP2-AS2	red blood cells
SCNM1	3.39e-34	1.254	0.46	0.22	6.58e-30	6	SCNM1	red blood cells
SMAD5-AS1	7.3e-73	1.24961	0.19	0.016	1.42e-68	6	SMAD5-AS1	red blood cells
BCAS2	3.53e-24	1.24613	0.509	0.346	6.86e-20	6	BCAS2	red blood cells
LYL1	4.29e-45	1.23689	0.412	0.127	8.34e-41	6	LYL1	red blood cells
TXNDC17	3.96e-14	1.23375	0.471	0.378	7.69e-10	6	TXNDC17	red blood cells
CNBP	3.37e-40	1.22578	0.768	0.704	6.55e-36	6	CNBP	red blood cells
MRPL41	3.2e-28	1.21618	0.581	0.417	6.22e-24	6	MRPL41	red blood cells
LAMTOR2	6.53e-28	1.21105	0.581	0.422	1.27e-23	6	LAMTOR2	red blood cells
AL139220.2	6.85e-55	1.20527	0.329	0.074	1.33e-50	6	AL139220.2	red blood cells
MRPL55	9.26e-28	1.2045	0.55	0.375	1.8e-23	6	MRPL55	red blood cells
HIST1H2BJ	1.17e-52	1.20299	0.304	0.066	2.27e-48	6	HIST1H2BJ	red blood cells
SUGT1	6.87e-16	1.20194	0.533	0.456	1.33e-11	6	SUGT1	red blood cells
LBH	1.48e-26	1.1992	0.408	0.195	2.87e-22	6	LBH	red blood cells
LINC02062	1.45e-122	1.19881	0.318	0.028	2.82e-118	6	LINC02062	red blood cells
CYSTM1	3.37e-17	1.19689	0.36	0.203	6.54e-13	6	CYSTM1	red blood cells
EMC3	5.67e-25	1.19429	0.481	0.298	1.1e-20	6	EMC3	red blood cells
ABHD5	7e-23	1.19198	0.353	0.169	1.36e-18	6	ABHD5	red blood cells
B2M	1.62e-07	1.19189	0.651	0.68	0.00313959	6	B2M	red blood cells
EXOSC1	4e-32	1.19181	0.436	0.209	7.76e-28	6	EXOSC1	red blood cells
EIF4A3	1.19e-23	1.18995	0.578	0.446	2.31e-19	6	EIF4A3	red blood cells
CNBD2	2.04e-56	1.18716	0.329	0.073	3.97e-52	6	CNBD2	red blood cells
RBM8A1	4.56e-43	1.18548	0.772	0.67	8.86e-39	6	RBM8A	red blood cells
NEU1	2.83e-23	1.18258	0.412	0.227	5.5e-19	6	NEU1	red blood cells
ZNF667-AS1	3.92e-18	1.17174	0.443	0.304	7.61e-14	6	ZNF667-AS1	red blood cells
ATP5ME	1.38e-31	1.16955	0.792	0.75	2.69e-27	6	ATP5ME	red blood cells
AEN	1.36e-82	1.16715	0.336	0.05	2.65e-78	6	AEN	red blood cells
KRT19	7.63e-16	1.16701	0.346	0.191	1.48e-11	6	KRT19	red blood cells
POLR2K	2.11e-14	1.16175	0.519	0.458	4.1e-10	6	POLR2K	red blood cells
MPLKIP	5.69e-21	1.16041	0.543	0.424	1.11e-16	6	MPLKIP	red blood cells
TMEM165	1.33e-06	1.15841	0.388	0.353	0.0258219	6	TMEM165	red blood cells
TOB1	8.82e-05	1.15414	0.294	0.251	1	6	TOB1	red blood cells
MRPL51	3.88e-35	1.15229	0.758	0.635	7.54e-31	6	MRPL51	red blood cells
UQCR10	1.27e-45	1.15226	0.824	0.722	2.46e-41	6	UQCR10	red blood cells
WTAP	2.39e-15	1.14907	0.526	0.446	4.63e-11	6	WTAP	red blood cells
PRDX1	2.41e-47	1.14817	0.855	0.793	4.68e-43	6	PRDX1	red blood cells
CREG1	1.15e-16	1.14721	0.429	0.27	2.22e-12	6	CREG1	red blood cells
RSRC2	3.21e-13	1.14604	0.609	0.615	6.23e-09	6	RSRC2	red blood cells
TMEM50B	2.97e-23	1.13923	0.502	0.34	5.77e-19	6	TMEM50B	red blood cells
TMEM199	5.8e-49	1.13767	0.412	0.134	1.13e-44	6	TMEM199	red blood cells
UBE2F	2.25e-21	1.13475	0.398	0.223	4.37e-17	6	UBE2F	red blood cells
NDUFB3	4.79e-16	1.12819	0.574	0.523	9.31e-12	6	NDUFB3	red blood cells
GRPEL1	4.03e-42	1.12761	0.415	0.154	7.83e-38	6	GRPEL1	red blood cells
GTF3A	2.77e-21	1.12515	0.502	0.333	5.37e-17	6	GTF3A	red blood cells
DPH3	2.76e-25	1.12408	0.405	0.208	5.36e-21	6	DPH3	red blood cells
FRG1	1.62e-06	1.12352	0.394	0.364	0.031541	6	FRG1	red blood cells
POLR2F	4.49e-21	1.12124	0.567	0.459	8.72e-17	6	POLR2F	red blood cells
LSM10	2.9e-26	1.1196	0.474	0.279	5.63e-22	6	LSM10	red blood cells
MT1X	9.12e-20	1.11869	0.453	0.236	1.77e-15	6	MT1X	red blood cells
PIN4	5.06e-07	1.11553	0.426	0.412	0.00982771	6	PIN4	red blood cells
SNHG15	4.36e-30	1.11294	0.391	0.171	8.46e-26	6	SNHG15	red blood cells
CLK1	0.000623171	1.10795	0.464	0.512	1	6	CLK1	red blood cells
DLGAP1-AS2	4.5e-87	1.10702	0.242	0.022	8.73e-83	6	DLGAP1-AS2	red blood cells
RAN1	3.85e-34	1.10626	0.886	0.812	7.48e-30	6	RAN	red blood cells
SCAND1	2.21e-25	1.09707	0.661	0.592	4.29e-21	6	SCAND1	red blood cells
ATP5PF	2.73e-35	1.09056	0.875	0.799	5.3e-31	6	ATP5PF	red blood cells
MYL12A	7.8e-26	1.08245	0.754	0.674	1.51e-21	6	MYL12A	red blood cells
GNG5	5.21e-44	1.0709	0.855	0.756	1.01e-39	6	GNG5	red blood cells
IER5	1.16e-08	1.06343	0.322	0.23	0.000224345	6	IER5	red blood cells
ZFAND5	3.34e-15	1.06201	0.491	0.392	6.48e-11	6	ZFAND5	red blood cells
ADRM1	1.09e-19	1.06043	0.478	0.32	2.11e-15	6	ADRM1	red blood cells
AC100810.1	5.07e-14	1.05931	0.412	0.292	9.85e-10	6	AC100810.1	red blood cells
RPS19	7.87e-85	1.05891	1	0.991	1.53e-80	6	RPS19	red blood cells
PTP4A1	1.05e-06	1.05726	0.349	0.292	0.0204404	6	PTP4A1	red blood cells
SPTSSA1	1.43e-12	1.05564	0.363	0.243	2.78e-08	6	SPTSSA	red blood cells
MED31	4.84e-16	1.05537	0.322	0.176	9.41e-12	6	MED31	red blood cells
ATP5MPL	1.89e-35	1.05231	0.824	0.738	3.67e-31	6	ATP5MPL	red blood cells
MINCR	2.66e-37	1.04976	0.343	0.114	5.17e-33	6	MINCR	red blood cells
SAP30BP	1.55e-23	1.04958	0.495	0.323	3e-19	6	SAP30BP	red blood cells
SDHB	2.36e-20	1.0394	0.433	0.268	4.57e-16	6	SDHB	red blood cells
RPF2	5.49e-14	1.03898	0.336	0.205	1.07e-09	6	RPF2	red blood cells
SPCS1	1.06e-27	1.03878	0.692	0.614	2.06e-23	6	SPCS1	red blood cells
LAGE3	7.61e-10	1.03839	0.422	0.356	1.48e-05	6	LAGE3	red blood cells
MRPL33	1.44e-11	1.03631	0.564	0.558	2.79e-07	6	MRPL33	red blood cells
DDB2	2.15e-33	1.03063	0.339	0.118	4.17e-29	6	DDB2	red blood cells
NDUFAF8	1.86e-17	1.02899	0.509	0.4	3.62e-13	6	NDUFAF8	red blood cells
AC005261.2	3.04e-145	1.02898	0.215	0.006	5.91e-141	6	AC005261.2	red blood cells
APOPT1	8.15e-17	1.02643	0.478	0.357	1.58e-12	6	APOPT1	red blood cells
ADIPOR1	5.65e-24	1.02602	0.519	0.316	1.1e-19	6	ADIPOR1	red blood cells
CDKN1C	2.84e-15	1.02104	0.567	0.46	5.52e-11	6	CDKN1C	red blood cells
CMC2	1.46e-12	1.01168	0.415	0.3	2.83e-08	6	CMC2	red blood cells
MT1G	4.85e-27	1.00969	0.446	0.184	9.41e-23	6	MT1G	red blood cells
UBE2L3	2.77e-19	1.0071	0.564	0.457	5.37e-15	6	UBE2L3	red blood cells
PSMB6	5.26e-17	1.00499	0.633	0.641	1.02e-12	6	PSMB6	red blood cells
ZNRD1	1.69e-22	1.00474	0.522	0.374	3.28e-18	6	ZNRD1	red blood cells
LSM1	4.74e-20	1.00315	0.481	0.329	9.2e-16	6	LSM1	red blood cells
SAC3D1	3.32e-19	1.00137	0.349	0.178	6.44e-15	6	SAC3D1	red blood cells
JOSD2	4.5e-22	1.00053	0.398	0.218	8.74e-18	6	JOSD2	red blood cells
UTP23	2.32e-17	0.998048	0.294	0.143	4.51e-13	6	UTP23	red blood cells
UBE2K	0.000220323	0.997944	0.329	0.297	1	6	UBE2K	red blood cells
GTF2B	0.000103964	0.997714	0.318	0.287	1	6	GTF2B	red blood cells
ERH	4.93e-23	0.995696	0.772	0.74	9.57e-19	6	ERH	red blood cells
SURF1	7.24e-20	0.994087	0.481	0.328	1.41e-15	6	SURF1	red blood cells
SARNP	8.42e-28	0.994015	0.367	0.163	1.63e-23	6	SARNP	red blood cells
SS18L2	9.85e-13	0.993779	0.394	0.284	1.91e-08	6	SS18L2	red blood cells
CCDC90B	1.65e-11	0.992242	0.481	0.413	3.2e-07	6	CCDC90B	red blood cells
DUSP14	1.33e-36	0.991243	0.26	0.066	2.58e-32	6	DUSP14	red blood cells
PIM3	4.19e-14	0.988994	0.381	0.244	8.14e-10	6	PIM3	red blood cells
IKBIP	3.06e-08	0.986955	0.325	0.24	0.000595026	6	IKBIP	red blood cells
TRMT10C	4.12e-08	0.985817	0.325	0.241	0.000799967	6	TRMT10C	red blood cells
MXI1	9.13e-20	0.985477	0.491	0.329	1.77e-15	6	MXI1	red blood cells
HBA1	1.27e-91	0.980823	0.979	0.815	2.47e-87	6	HBA1	red blood cells
RPL26L1	2.63e-12	0.980308	0.45	0.357	5.11e-08	6	RPL26L1	red blood cells
AP004609.3	8.69e-41	0.978919	0.256	0.059	1.69e-36	6	AP004609.3	red blood cells
ARL6IP11	4.33e-28	0.977513	0.671	0.494	8.4e-24	6	ARL6IP1	red blood cells
OSER1-DT	3.99e-33	0.972538	0.36	0.137	7.75e-29	6	OSER1-DT	red blood cells
SLC5A31	8.84e-11	0.969439	0.439	0.35	1.72e-06	6	SLC5A3	red blood cells
AC004264.1	2.97e-96	0.969016	0.197	0.011	5.77e-92	6	AC004264.1	red blood cells
C14orf119	1.25e-16	0.968538	0.426	0.287	2.43e-12	6	C14orf119	red blood cells
UBE2A	1.52e-13	0.968509	0.464	0.376	2.95e-09	6	UBE2A	red blood cells
MRPL18	1.35e-13	0.963026	0.481	0.398	2.61e-09	6	MRPL18	red blood cells
POLR2J	5.58e-21	0.962188	0.626	0.551	1.08e-16	6	POLR2J	red blood cells
TXNIP	9.47e-07	0.959575	0.488	0.45	0.0183868	6	TXNIP	red blood cells
CAMLG	1.25e-19	0.958783	0.657	0.593	2.43e-15	6	CAMLG	red blood cells
MAT2A	5.38e-06	0.952531	0.339	0.281	0.104389	6	MAT2A	red blood cells
MIR4435-2HG	1.76e-35	0.951815	0.325	0.102	3.42e-31	6	MIR4435-2HG	red blood cells
PLEK2	4.02e-36	0.948902	0.294	0.082	7.8e-32	6	PLEK2	red blood cells
PNRC2	1.32e-05	0.946697	0.367	0.33	0.256098	6	PNRC2	red blood cells
SERP1	2.49e-10	0.946103	0.581	0.601	4.83e-06	6	SERP1	red blood cells
TUSC2	3.56e-28	0.945689	0.374	0.165	6.92e-24	6	TUSC2	red blood cells
NELFE	5.16e-13	0.943742	0.509	0.437	1e-08	6	NELFE	red blood cells
NANS	3.74e-15	0.942856	0.439	0.318	7.26e-11	6	NANS	red blood cells
IMP3	2.12e-12	0.938703	0.377	0.262	4.11e-08	6	IMP3	red blood cells
SFPQ1	3.25e-22	0.935962	0.723	0.634	6.31e-18	6	SFPQ	red blood cells
MRPS18C	5.22e-09	0.93489	0.377	0.303	0.000101334	6	MRPS18C	red blood cells
RNF181	5.24e-13	0.934645	0.512	0.447	1.02e-08	6	RNF181	red blood cells
EDF1	7.4e-34	0.930658	0.841	0.798	1.44e-29	6	EDF1	red blood cells
NPL	6.29e-27	0.93043	0.273	0.092	1.22e-22	6	NPL	red blood cells
RSRP1	9e-17	0.928528	0.661	0.598	1.75e-12	6	RSRP1	red blood cells
KLHL21	6.72e-73	0.927212	0.266	0.035	1.31e-68	6	KLHL21	red blood cells
BROX	3.86e-14	0.926611	0.298	0.16	7.5e-10	6	BROX	red blood cells
ZFAND6	0.000661368	0.924388	0.391	0.405	1	6	ZFAND6	red blood cells
BRD21	5.98e-08	0.92394	0.481	0.447	0.0011604	6	BRD2	red blood cells
NACA	2.11e-58	0.923646	1	0.974	4.09e-54	6	NACA	red blood cells
EIF2S1	2.69e-08	0.922754	0.377	0.311	0.00052267	6	EIF2S1	red blood cells
HIST3H2A	2.68e-08	0.92258	0.467	0.414	0.000520176	6	HIST3H2A	red blood cells
AC025159.1	3.5e-16	0.922307	0.277	0.132	6.79e-12	6	AC025159.1	red blood cells
PCNP	1.16e-07	0.92183	0.46	0.443	0.0022446	6	PCNP	red blood cells
TUBB2A1	1.84e-14	0.921509	0.491	0.353	3.57e-10	6	TUBB2A	red blood cells
RPS19BP1	2.6e-08	0.919619	0.457	0.43	0.000504257	6	RPS19BP1	red blood cells
GTF2H1	2.42e-09	0.915963	0.242	0.142	4.7e-05	6	GTF2H1	red blood cells
HBA2	8.41e-98	0.915477	1	0.886	1.63e-93	6	HBA2	red blood cells
CDKN1B	3.64e-11	0.915191	0.37	0.262	7.06e-07	6	CDKN1B	red blood cells
SERF2	6.06e-55	0.913732	0.983	0.903	1.18e-50	6	SERF2	red blood cells
UBE2D2	6.79e-22	0.911199	0.685	0.622	1.32e-17	6	UBE2D2	red blood cells
AL034549.1	3.54e-84	0.910723	0.215	0.018	6.87e-80	6	AL034549.1	red blood cells
PHPT1	3.39e-10	0.909938	0.623	0.662	6.58e-06	6	PHPT1	red blood cells
SLC20A1	3.98e-18	0.909487	0.363	0.194	7.72e-14	6	SLC20A1	red blood cells
ARF4-AS1	2.86e-72	0.909254	0.249	0.031	5.55e-68	6	ARF4-AS1	red blood cells
ZNF778	1.76e-61	0.909121	0.256	0.039	3.41e-57	6	ZNF778	red blood cells
NDUFB6	4.71e-06	0.90715	0.408	0.383	0.0915593	6	NDUFB6	red blood cells
DEDD2	1.71e-16	0.90715	0.374	0.219	3.31e-12	6	DEDD2	red blood cells
ARG2	3.44e-55	0.906014	0.301	0.059	6.68e-51	6	ARG2	red blood cells
AC040169.1	3.75e-43	0.905661	0.187	0.029	7.29e-39	6	AC040169.1	red blood cells
AL139274.2	3.2e-32	0.901322	0.149	0.025	6.22e-28	6	AL139274.2	red blood cells
AC124016.1	1.02e-34	0.898877	0.225	0.052	1.98e-30	6	AC124016.1	red blood cells
SLC3A2	1.38e-16	0.896485	0.678	0.643	2.67e-12	6	SLC3A2	red blood cells
DGUOK1	9.59e-08	0.895234	0.505	0.513	0.00186179	6	DGUOK	red blood cells
TRAPPC4	7.2e-14	0.895125	0.439	0.326	1.4e-09	6	TRAPPC4	red blood cells
NDUFB10	1.21e-24	0.895099	0.716	0.68	2.34e-20	6	NDUFB10	red blood cells
C6orf621	9.32e-23	0.892896	0.412	0.215	1.81e-18	6	C6orf62	red blood cells
SNRPE1	3.71e-14	0.892392	0.675	0.657	7.21e-10	6	SNRPE	red blood cells
UCA1	5.62e-39	0.891264	0.17	0.026	1.09e-34	6	UCA1	red blood cells
REXO2	1.43e-08	0.888865	0.401	0.337	0.000277314	6	REXO2	red blood cells
DNAJB2	5.38e-14	0.887961	0.394	0.268	1.05e-09	6	DNAJB2	red blood cells
EAPP	6.14e-06	0.884416	0.401	0.375	0.11924	6	EAPP	red blood cells
C12orf65	7.95e-09	0.881963	0.273	0.176	0.00015439	6	C12orf65	red blood cells
CHD2	1.52e-05	0.880838	0.37	0.333	0.294895	6	CHD2	red blood cells
MRPS12	2.69e-15	0.880247	0.36	0.219	5.22e-11	6	MRPS12	red blood cells
NXF1	3.23e-07	0.87722	0.215	0.13	0.00626801	6	NXF1	red blood cells
OST4	2.06e-39	0.876588	0.91	0.813	4e-35	6	OST4	red blood cells
MRPL40	6.39e-11	0.874648	0.439	0.37	1.24e-06	6	MRPL40	red blood cells
MIEN1	2.35e-25	0.874611	0.419	0.209	4.56e-21	6	MIEN1	red blood cells
DYNLT1	1.64e-09	0.874483	0.564	0.562	3.19e-05	6	DYNLT1	red blood cells
DNAJB9	1.77e-08	0.873581	0.363	0.286	0.000342848	6	DNAJB9	red blood cells
TAF9	4.28e-05	0.87186	0.363	0.336	0.831267	6	TAF9	red blood cells
AL451165.2	4.33e-25	0.868818	0.201	0.056	8.42e-21	6	AL451165.2	red blood cells
JTB	2.03e-11	0.867162	0.557	0.542	3.94e-07	6	JTB	red blood cells
KCTD201	4.55e-14	0.866263	0.394	0.262	8.83e-10	6	KCTD20	red blood cells
KRTCAP2	1.27e-12	0.866257	0.467	0.377	2.46e-08	6	KRTCAP2	red blood cells
MRFAP1	9.52e-23	0.865152	0.72	0.689	1.85e-18	6	MRFAP1	red blood cells
ZNF529-AS1	7.28e-39	0.863724	0.246	0.057	1.41e-34	6	ZNF529-AS1	red blood cells
HIST1H2BN	7.94e-34	0.862336	0.221	0.052	1.54e-29	6	HIST1H2BN	red blood cells
ATP5IF1	4.04e-06	0.861345	0.626	0.677	0.0783941	6	ATP5IF1	red blood cells
CEBPB	3.73e-05	0.860212	0.325	0.276	0.725037	6	CEBPB	red blood cells
TXN	5.37e-10	0.859454	0.651	0.675	1.04e-05	6	TXN	red blood cells
DHDH	1.17e-37	0.859176	0.218	0.046	2.27e-33	6	DHDH	red blood cells
COX20	3.22e-10	0.854208	0.488	0.441	6.25e-06	6	COX20	red blood cells
LSM3	7.36e-18	0.85302	0.606	0.526	1.43e-13	6	LSM3	red blood cells
ATP6V0B1	1.16e-18	0.851385	0.612	0.514	2.26e-14	6	ATP6V0B	red blood cells
NOP561	6.17e-12	0.851046	0.498	0.415	1.2e-07	6	NOP56	red blood cells
RRM2B	1.2e-16	0.848166	0.159	0.05	2.32e-12	6	RRM2B	red blood cells
TGFB1	7.23e-18	0.848116	0.273	0.118	1.4e-13	6	TGFB1	red blood cells
DAD1	4.8e-13	0.847415	0.668	0.64	9.33e-09	6	DAD1	red blood cells
MFSD11	0.00270261	0.845724	0.221	0.184	1	6	MFSD11	red blood cells
TPT1	7.27e-59	0.843213	1	0.996	1.41e-54	6	TPT1	red blood cells
AL355472.1	1.38e-39	0.841398	0.204	0.038	2.67e-35	6	AL355472.1	red blood cells
SIVA1	1.18e-15	0.840914	0.633	0.58	2.29e-11	6	SIVA1	red blood cells
EXOSC4	8.99e-19	0.83555	0.308	0.148	1.75e-14	6	EXOSC4	red blood cells
TOMM201	5.77e-23	0.834883	0.723	0.67	1.12e-18	6	TOMM20	red blood cells
RPP21	7.46e-12	0.83456	0.343	0.226	1.45e-07	6	RPP21	red blood cells
ZNF593	1.46e-15	0.833378	0.367	0.224	2.83e-11	6	ZNF593	red blood cells
MRPL34	5.41e-10	0.832429	0.436	0.366	1.05e-05	6	MRPL34	red blood cells
PSMB7	2.04e-14	0.828507	0.654	0.661	3.95e-10	6	PSMB7	red blood cells
PPM1D	3.13e-19	0.827926	0.246	0.096	6.08e-15	6	PPM1D	red blood cells
DRAM1	3.21e-46	0.827245	0.249	0.05	6.23e-42	6	DRAM1	red blood cells
AC010271.2	8.5e-118	0.826437	0.163	0.003	1.65e-113	6	AC010271.2	red blood cells
MRPL2	9.61e-12	0.826012	0.37	0.256	1.87e-07	6	MRPL2	red blood cells
CREBRF	0.000190747	0.825332	0.266	0.219	1	6	CREBRF	red blood cells
SOD2	3.78e-08	0.82509	0.249	0.157	0.000733559	6	SOD2	red blood cells
ZNF419	1.08e-41	0.824901	0.228	0.046	2.11e-37	6	ZNF419	red blood cells
LARP4	2.16e-08	0.82449	0.246	0.151	0.000420334	6	LARP4	red blood cells
HSCB	8.33e-14	0.824056	0.329	0.196	1.62e-09	6	HSCB	red blood cells
PNRC1	3.14e-10	0.822711	0.599	0.597	6.1e-06	6	PNRC1	red blood cells
KANSL1-AS1	2.69e-16	0.822308	0.27	0.126	5.22e-12	6	KANSL1-AS1	red blood cells
AC009113.1	1.15e-37	0.820599	0.215	0.045	2.23e-33	6	AC009113.1	red blood cells
TSSC4	2.28e-07	0.818275	0.36	0.292	0.00443669	6	TSSC4	red blood cells
CCDC117	7.22e-20	0.818254	0.301	0.136	1.4e-15	6	CCDC117	red blood cells
SYF2	1.46e-11	0.81775	0.574	0.548	2.84e-07	6	SYF2	red blood cells
AC006213.1	4.57e-75	0.815497	0.18	0.013	8.87e-71	6	AC006213.1	red blood cells
NOP16	2.78e-31	0.813182	0.239	0.064	5.4e-27	6	NOP16	red blood cells
DERL2	5.52e-11	0.812579	0.405	0.314	1.07e-06	6	DERL2	red blood cells
AHSA1	2.01e-10	0.812137	0.471	0.406	3.89e-06	6	AHSA1	red blood cells
PSMD12	6.83e-06	0.809102	0.336	0.283	0.13255	6	PSMD12	red blood cells
NAA60	1.29e-13	0.808397	0.298	0.166	2.5e-09	6	NAA60	red blood cells
SLC25A33	2.98e-14	0.806871	0.291	0.155	5.78e-10	6	SLC25A33	red blood cells
TNFRSF12A	9.74e-47	0.804752	0.19	0.028	1.89e-42	6	TNFRSF12A	red blood cells
KRT10	7.58e-08	0.803442	0.623	0.669	0.00147278	6	KRT10	red blood cells
PDCD51	8.57e-09	0.801987	0.522	0.506	0.000166504	6	PDCD5	red blood cells
ATP6V0D1	5.14e-11	0.801117	0.405	0.309	9.98e-07	6	ATP6V0D1	red blood cells
SNRPD3	2.48e-10	0.800769	0.626	0.632	4.81e-06	6	SNRPD3	red blood cells
PPP1R14C	1.82e-21	0.79664	0.239	0.082	3.53e-17	6	PPP1R14C	red blood cells
LINC01089	6.47e-07	0.794014	0.173	0.095	0.0125705	6	LINC01089	red blood cells
MEA1	1.35e-10	0.793662	0.471	0.403	2.63e-06	6	MEA1	red blood cells
SKP1	1.14e-19	0.792999	0.813	0.823	2.21e-15	6	SKP1	red blood cells
TMBIM6	5.27e-21	0.790951	0.747	0.74	1.02e-16	6	TMBIM6	red blood cells
SPCS2	7.95e-13	0.790035	0.657	0.667	1.54e-08	6	SPCS2	red blood cells
UFD1	1.52e-11	0.788111	0.433	0.335	2.95e-07	6	UFD1	red blood cells
UXT	4.52e-15	0.787863	0.606	0.549	8.78e-11	6	UXT	red blood cells
AC087239.1	2.76e-23	0.787214	0.152	0.035	5.37e-19	6	AC087239.1	red blood cells
POLR2L	1.2e-09	0.787056	0.651	0.706	2.33e-05	6	POLR2L	red blood cells
ZNHIT3	2.56e-10	0.786108	0.464	0.404	4.97e-06	6	ZNHIT3	red blood cells
PPP1R10	0.000635454	0.785998	0.311	0.278	1	6	PPP1R10	red blood cells
CDK2AP2	3.36e-09	0.783397	0.256	0.154	6.53e-05	6	CDK2AP2	red blood cells
C16orf91	6.1e-16	0.780649	0.291	0.145	1.19e-11	6	C16orf91	red blood cells
SGF29	1.07e-19	0.779993	0.273	0.113	2.07e-15	6	SGF29	red blood cells
R3HDM4	3.36e-11	0.778379	0.349	0.225	6.53e-07	6	R3HDM4	red blood cells
ERP44	1.88e-06	0.778103	0.415	0.389	0.0364822	6	ERP44	red blood cells
ZNF436-AS1	1.35e-32	0.777616	0.215	0.051	2.61e-28	6	ZNF436-AS1	red blood cells
HIST1H2AE	5.29e-13	0.776559	0.138	0.046	1.03e-08	6	HIST1H2AE	red blood cells
C14orf28	5.46e-37	0.776531	0.208	0.043	1.06e-32	6	C14orf28	red blood cells
THAP2	4.93e-07	0.776474	0.197	0.117	0.00957883	6	THAP2	red blood cells
CEBPG	1.01e-25	0.774153	0.298	0.107	1.96e-21	6	CEBPG	red blood cells
RPS25	2.41e-42	0.773132	0.997	0.966	4.67e-38	6	RPS25	red blood cells
MAD2L1BP	2.43e-20	0.770313	0.263	0.104	4.71e-16	6	MAD2L1BP	red blood cells
CPEB4	2.06e-10	0.77012	0.301	0.188	4e-06	6	CPEB4	red blood cells
RAB5IF	1.84e-13	0.767882	0.426	0.305	3.57e-09	6	RAB5IF	red blood cells
CCT8	1.3e-15	0.767234	0.789	0.748	2.53e-11	6	CCT8	red blood cells
FOXN2	1.1e-14	0.765025	0.187	0.071	2.14e-10	6	FOXN2	red blood cells
CLPP	9.31e-07	0.763775	0.457	0.445	0.0180717	6	CLPP	red blood cells
CENPX	7.51e-08	0.759775	0.439	0.397	0.00145758	6	CENPX	red blood cells
NDUFV2-AS1	2.2e-30	0.758493	0.187	0.041	4.28e-26	6	NDUFV2-AS1	red blood cells
ZNHIT2	1.06e-39	0.756596	0.256	0.059	2.06e-35	6	ZNHIT2	red blood cells
AL353708.3	5.15e-63	0.756393	0.19	0.02	1e-58	6	AL353708.3	red blood cells
EIF4A2	0.000373682	0.75598	0.799	0.814	1	6	EIF4A2	red blood cells
GSTO1	3.17e-07	0.755571	0.495	0.461	0.0061507	6	GSTO1	red blood cells
TMEM44-AS1	8.61e-65	0.754242	0.221	0.027	1.67e-60	6	TMEM44-AS1	red blood cells
TRIB3	8.59e-30	0.749106	0.166	0.032	1.67e-25	6	TRIB3	red blood cells
GLUL	1.06e-05	0.747354	0.529	0.558	0.206741	6	GLUL	red blood cells
UNC50	0.000160485	0.746683	0.256	0.203	1	6	UNC50	red blood cells
AC008267.5	1.43e-24	0.742504	0.256	0.089	2.78e-20	6	AC008267.5	red blood cells
WDR83OS	2.02e-17	0.742482	0.699	0.698	3.92e-13	6	WDR83OS	red blood cells
DLGAP1-AS1	2.7e-21	0.741985	0.197	0.06	5.25e-17	6	DLGAP1-AS1	red blood cells
AL121990.1	7.46e-80	0.740703	0.114	0.003	1.45e-75	6	AL121990.1	red blood cells
KBTBD2	8.48e-08	0.739369	0.221	0.132	0.00164748	6	KBTBD2	red blood cells
DYNLL2	1.98e-13	0.735121	0.346	0.207	3.84e-09	6	DYNLL2	red blood cells
ZNF331	1.03e-07	0.731263	0.187	0.101	0.00200462	6	ZNF331	red blood cells
EXOSC5	1.08e-11	0.729486	0.246	0.129	2.1e-07	6	EXOSC5	red blood cells
RAB9A	0.000195038	0.727229	0.28	0.237	1	6	RAB9A	red blood cells
ZNF226	2.84e-12	0.726123	0.308	0.186	5.51e-08	6	ZNF226	red blood cells
ERVK3-1	1.13e-18	0.725382	0.256	0.106	2.2e-14	6	ERVK3-1	red blood cells
FAM32A	6.75e-08	0.723702	0.467	0.429	0.00131164	6	FAM32A	red blood cells
RPS13	1.09e-40	0.720128	0.997	0.976	2.12e-36	6	RPS13	red blood cells
C11orf58	1.95e-09	0.718014	0.657	0.686	3.78e-05	6	C11orf58	red blood cells
TOMM22	7.66e-08	0.717746	0.509	0.512	0.00148718	6	TOMM22	red blood cells
RPL23A	1.86e-35	0.717746	0.99	0.971	3.62e-31	6	RPL23A	red blood cells
SNRPA11	2.95e-07	0.7174	0.381	0.316	0.00573273	6	SNRPA1	red blood cells
PRDX6	1.69e-22	0.716018	0.803	0.796	3.28e-18	6	PRDX6	red blood cells
UBE2H	0.00933909	0.71499	0.384	0.42	1	6	UBE2H	red blood cells
FADS3	1.94e-21	0.714702	0.242	0.087	3.76e-17	6	FADS3	red blood cells
MED29	2.11e-07	0.71463	0.308	0.228	0.00409978	6	MED29	red blood cells
RAB5C	1.13e-07	0.713935	0.478	0.466	0.00220225	6	RAB5C	red blood cells
UBA52	8.69e-46	0.713745	0.948	0.925	1.69e-41	6	UBA52	red blood cells
AL163051.1	4.27e-45	0.713483	0.17	0.023	8.3e-41	6	AL163051.1	red blood cells
EIF2AK1	1.92e-06	0.71308	0.405	0.355	0.0371885	6	EIF2AK1	red blood cells
PMAIP11	0.000527001	0.712856	0.111	0.063	1	6	PMAIP1	red blood cells
ERN1	9.16e-13	0.712404	0.18	0.073	1.78e-08	6	ERN1	red blood cells
KATNA1	0.000918019	0.712204	0.239	0.198	1	6	KATNA1	red blood cells
AC132192.2	1.73e-30	0.711776	0.149	0.026	3.36e-26	6	AC132192.2	red blood cells
SLC25A19	2.24e-50	0.710278	0.221	0.035	4.35e-46	6	SLC25A19	red blood cells
LENG1	4.45e-17	0.710006	0.277	0.128	8.64e-13	6	LENG1	red blood cells
RAP1B	0.000118151	0.707068	0.471	0.495	1	6	RAP1B	red blood cells
TMEM111	4.17e-10	0.707056	0.388	0.292	8.1e-06	6	TMEM11	red blood cells
ATF1	2.45e-10	0.706729	0.249	0.14	4.75e-06	6	ATF1	red blood cells
THAP7-AS1	1.69e-34	0.705048	0.204	0.044	3.29e-30	6	THAP7-AS1	red blood cells
LRIF1	1.8e-06	0.704451	0.163	0.09	0.0349895	6	LRIF1	red blood cells
CHTOP1	1.07e-07	0.704063	0.346	0.266	0.00207588	6	CHTOP	red blood cells
BTG1	2.03e-08	0.703312	0.734	0.725	0.000394303	6	BTG1	red blood cells
AC044849.1	4.36e-30	0.703181	0.183	0.04	8.47e-26	6	AC044849.1	red blood cells
PRDX5	1.46e-11	0.701821	0.678	0.74	2.83e-07	6	PRDX5	red blood cells
RASD1	2.4e-09	0.701766	0.111	0.039	4.65e-05	6	RASD1	red blood cells
BUD23	3.24e-07	0.700781	0.339	0.265	0.00630102	6	BUD23	red blood cells
AC009831.1	7.97e-41	0.699071	0.125	0.013	1.55e-36	6	AC009831.1	red blood cells
NDRG1	5.1e-08	0.698574	0.266	0.169	0.000989913	6	NDRG1	red blood cells
PNPLA2	5.6e-07	0.695746	0.232	0.148	0.0108711	6	PNPLA2	red blood cells
CACYBP	6.66e-05	0.693665	0.522	0.575	1	6	CACYBP	red blood cells
COQ10B	4.9e-11	0.69356	0.263	0.15	9.51e-07	6	COQ10B	red blood cells
CHCHD1	1.31e-07	0.69274	0.443	0.404	0.00254294	6	CHCHD1	red blood cells
BRMS1	3.06e-21	0.692577	0.28	0.114	5.93e-17	6	BRMS1	red blood cells
C1orf61	6.85e-36	0.692507	0.159	0.025	1.33e-31	6	C1orf61	red blood cells
DCUN1D1	0.00177636	0.691601	0.242	0.205	1	6	DCUN1D1	red blood cells
GLRX2	4.12e-11	0.691275	0.228	0.118	8e-07	6	GLRX2	red blood cells
SF3B5	0.000819848	0.689984	0.516	0.606	1	6	SF3B5	red blood cells
KLF1	3.74e-20	0.6858	0.298	0.115	7.27e-16	6	KLF1	red blood cells
TMEM150A	5.48e-24	0.685156	0.235	0.077	1.06e-19	6	TMEM150A	red blood cells
COA5	0.000985977	0.684254	0.343	0.33	1	6	COA5	red blood cells
WDR45	2.16e-05	0.683184	0.325	0.274	0.420256	6	WDR45	red blood cells
MGAT4B	7.43e-08	0.682349	0.263	0.169	0.00144364	6	MGAT4B	red blood cells
UFC1	6.94e-13	0.681609	0.633	0.607	1.35e-08	6	UFC1	red blood cells
MRPS16	8.98e-06	0.681559	0.37	0.329	0.174431	6	MRPS16	red blood cells
FAM117A	1.43e-14	0.681445	0.26	0.123	2.77e-10	6	FAM117A	red blood cells
RASL11A	2.49e-20	0.681313	0.218	0.075	4.83e-16	6	RASL11A	red blood cells
SUPV3L1	2.79e-08	0.679868	0.183	0.097	0.000541731	6	SUPV3L1	red blood cells
LAMTOR1	8.86e-07	0.679193	0.512	0.533	0.0172118	6	LAMTOR1	red blood cells
GABARAPL1	6.62e-06	0.673321	0.343	0.288	0.128608	6	GABARAPL1	red blood cells
HSPA9	3.84e-06	0.67298	0.408	0.373	0.0745638	6	HSPA9	red blood cells
HTRA2	2.22e-11	0.67215	0.346	0.228	4.3e-07	6	HTRA2	red blood cells
SSR4	8.13e-08	0.671638	0.64	0.681	0.00157933	6	SSR4	red blood cells
SEPSECS-AS1	1.52e-15	0.670924	0.131	0.037	2.96e-11	6	SEPSECS-AS1	red blood cells
OCEL1	1.23e-13	0.669591	0.235	0.111	2.38e-09	6	OCEL1	red blood cells
MRPS15	4.59e-07	0.669478	0.443	0.413	0.00891299	6	MRPS15	red blood cells
TAF13	7.8e-13	0.669216	0.211	0.095	1.51e-08	6	TAF13	red blood cells
ACHE	2.33e-09	0.668313	0.197	0.102	4.53e-05	6	ACHE	red blood cells
TCTA	1.14e-16	0.666048	0.239	0.099	2.21e-12	6	TCTA	red blood cells
ATP23	5.45e-11	0.66558	0.204	0.099	1.06e-06	6	ATP23	red blood cells
USP12	1.08e-11	0.664471	0.225	0.11	2.09e-07	6	USP12	red blood cells
AC002310.1	3.45e-25	0.66251	0.18	0.045	6.71e-21	6	AC002310.1	red blood cells
PSENEN	2.4e-08	0.662021	0.343	0.255	0.000465544	6	PSENEN	red blood cells
BOLA1	1.72e-11	0.660782	0.249	0.133	3.34e-07	6	BOLA1	red blood cells
POLE3	6.31e-09	0.659739	0.304	0.202	0.000122447	6	POLE3	red blood cells
LINC00476	6.38e-17	0.657614	0.166	0.053	1.24e-12	6	LINC00476	red blood cells
MKNK2	4.63e-05	0.657398	0.221	0.157	0.899574	6	MKNK2	red blood cells
TMEM222	9.73e-08	0.65445	0.318	0.233	0.00188868	6	TMEM222	red blood cells
HSPBAP1	3.61e-15	0.653343	0.145	0.045	7.01e-11	6	HSPBAP1	red blood cells
ALG3	8.73e-08	0.652173	0.28	0.191	0.00169449	6	ALG3	red blood cells
C19orf73	2.12e-61	0.651789	0.197	0.022	4.12e-57	6	C19orf73	red blood cells
AC011445.2	4e-59	0.651082	0.152	0.012	7.77e-55	6	AC011445.2	red blood cells
AL359513.1	3.25e-25	0.649139	0.152	0.032	6.32e-21	6	AL359513.1	red blood cells
HAUS6	0.000286717	0.648434	0.138	0.085	1	6	HAUS6	red blood cells
PRELID3B	3.68e-07	0.647592	0.27	0.187	0.00715201	6	PRELID3B	red blood cells
CCDC174	3.78e-09	0.645027	0.291	0.19	7.35e-05	6	CCDC174	red blood cells
YBX11	3.07e-24	0.642758	0.893	0.918	5.96e-20	6	YBX1	red blood cells
CGGBP1	0.000105786	0.641588	0.374	0.348	1	6	CGGBP1	red blood cells
SSNA1	0.00459589	0.639996	0.412	0.451	1	6	SSNA1	red blood cells
SLU71	3.04e-05	0.639882	0.291	0.232	0.589507	6	SLU7	red blood cells
RPS28	1.54e-29	0.639438	0.997	0.982	3e-25	6	RPS28	red blood cells
TIMM8B	0.00256629	0.638712	0.495	0.565	1	6	TIMM8B	red blood cells
MRPL49	3.28e-08	0.637974	0.301	0.211	0.000637178	6	MRPL49	red blood cells
[truncated: 5,638 more rows]

## Sheet: PCW8_14817
14817; 8 PCW; Full Eye
	p_val	avg_log2FC	pct.1	pct.2	p_val_adj	cluster	gene	cell fate
OGN	5.15e-273	2.22541	0.954	0.501	1.02e-268	0	OGN	periocular mesenchyme
ASPN	5.06e-252	1.84391	0.677	0.148	9.99e-248	0	ASPN	periocular mesenchyme
COL1A1	3.36e-224	1.51145	1	0.844	6.63e-220	0	COL1A1	periocular mesenchyme
NRP2	4.41e-260	1.36192	0.912	0.331	8.72e-256	0	NRP2	periocular mesenchyme
TSC22D1	3.44e-191	1.35704	0.974	0.652	6.8e-187	0	TSC22D1	periocular mesenchyme
PENK	5.25e-58	1.35361	0.323	0.111	1.04e-53	0	PENK	periocular mesenchyme
COL1A2	5.86e-220	1.32737	1	0.884	1.16e-215	0	COL1A2	periocular mesenchyme
PCOLCE	1.53e-189	1.24373	0.963	0.574	3.03e-185	0	PCOLCE	periocular mesenchyme
TM4SF1	2.55e-218	1.1995	0.667	0.161	5.05e-214	0	TM4SF1	periocular mesenchyme
FOXC1	6.34e-197	1.14624	0.95	0.449	1.25e-192	0	FOXC1	periocular mesenchyme
COL12A1	1.2e-152	1.13473	0.898	0.495	2.38e-148	0	COL12A1	periocular mesenchyme
LTBP1	7.06e-187	1.07413	0.845	0.338	1.4e-182	0	LTBP1	periocular mesenchyme
LMO4	1.8e-145	1.0618	0.935	0.636	3.56e-141	0	LMO4	periocular mesenchyme
PRSS35	2.29e-137	1.04819	0.761	0.327	4.53e-133	0	PRSS35	periocular mesenchyme
CTHRC1	1.27e-119	0.988261	0.86	0.442	2.51e-115	0	CTHRC1	periocular mesenchyme
MGP	1.95e-112	0.968965	0.921	0.542	3.86e-108	0	MGP	periocular mesenchyme
CDC42EP5	5.29e-161	0.964543	0.975	0.609	1.04e-156	0	CDC42EP5	periocular mesenchyme
COL11A1	6.45e-194	0.961755	0.78	0.263	1.27e-189	0	COL11A1	periocular mesenchyme
SIX2	1.29e-186	0.939652	0.634	0.172	2.55e-182	0	SIX2	periocular mesenchyme
COL3A1	2.02e-104	0.925226	0.996	0.835	4e-100	0	COL3A1	periocular mesenchyme
SPARC	2.08e-154	0.920053	0.997	0.841	4.11e-150	0	SPARC	periocular mesenchyme
C2orf40	5.21e-120	0.902422	0.758	0.338	1.03e-115	0	C2orf40	periocular mesenchyme
FIBIN	1.22e-148	0.900287	0.673	0.228	2.41e-144	0	FIBIN	periocular mesenchyme
LUM	6.43e-71	0.887486	0.919	0.64	1.27e-66	0	LUM	periocular mesenchyme
OLFML3	7.65e-135	0.884764	0.872	0.462	1.51e-130	0	OLFML3	periocular mesenchyme
GJA1	2.47e-137	0.86506	0.808	0.358	4.88e-133	0	GJA1	periocular mesenchyme
FOXP1	6.51e-129	0.862945	0.946	0.624	1.29e-124	0	FOXP1	periocular mesenchyme
PITX2	4.48e-132	0.854346	0.851	0.38	8.84e-128	0	PITX2	periocular mesenchyme
COL8A2	7.8e-164	0.826712	0.689	0.219	1.54e-159	0	COL8A2	periocular mesenchyme
IGF1	1.28e-109	0.802378	0.486	0.146	2.53e-105	0	IGF1	periocular mesenchyme
BOC	2.29e-132	0.793131	0.718	0.294	4.53e-128	0	BOC	periocular mesenchyme
CNN3	3.1e-114	0.777505	0.981	0.793	6.13e-110	0	CNN3	periocular mesenchyme
RERG	8.49e-128	0.769165	0.572	0.177	1.68e-123	0	RERG	periocular mesenchyme
CYR61	3.97e-68	0.760418	0.75	0.434	7.84e-64	0	CYR61	periocular mesenchyme
FAT1	5.01e-92	0.738797	0.722	0.385	9.89e-88	0	FAT1	periocular mesenchyme
CTGF	3.42e-58	0.736071	0.722	0.43	6.77e-54	0	CTGF	periocular mesenchyme
SGCD	8.96e-142	0.735887	0.613	0.197	1.77e-137	0	SGCD	periocular mesenchyme
LGALS1	4.14e-109	0.729657	1	0.929	8.19e-105	0	LGALS1	periocular mesenchyme
IL11RA	4.99e-105	0.72399	0.928	0.561	9.85e-101	0	IL11RA	periocular mesenchyme
DYNC1I1	4.72e-172	0.722301	0.541	0.123	9.33e-168	0	DYNC1I1	periocular mesenchyme
PITX1	3.53e-88	0.69528	0.696	0.321	6.97e-84	0	PITX1	periocular mesenchyme
EGFL6	3.71e-85	0.688773	0.747	0.384	7.33e-81	0	EGFL6	periocular mesenchyme
SCX	6.22e-102	0.684808	0.445	0.132	1.23e-97	0	SCX	periocular mesenchyme
CRABP2	1.46e-84	0.67342	0.952	0.643	2.89e-80	0	CRABP2	periocular mesenchyme
CDH11	8.41e-92	0.66982	0.892	0.565	1.66e-87	0	CDH11	periocular mesenchyme
NDNF	4.21e-109	0.665572	0.546	0.186	8.32e-105	0	NDNF	periocular mesenchyme
APP	4.61e-90	0.651335	0.907	0.624	9.1e-86	0	APP	periocular mesenchyme
RRBP1	1.69e-85	0.646722	0.892	0.597	3.33e-81	0	RRBP1	periocular mesenchyme
PRRX2	1.45e-104	0.641747	0.74	0.329	2.86e-100	0	PRRX2	periocular mesenchyme
MMP2	2.11e-84	0.637874	0.83	0.483	4.16e-80	0	MMP2	periocular mesenchyme
RFLNA	1.92e-122	0.632437	0.507	0.149	3.79e-118	0	RFLNA	periocular mesenchyme
CD81	4.19e-100	0.631828	0.994	0.857	8.28e-96	0	CD81	periocular mesenchyme
KCNQ1OT1	2e-65	0.631654	0.983	0.784	3.95e-61	0	KCNQ1OT1	periocular mesenchyme
COL9A3	2.76e-84	0.631367	0.523	0.2	5.45e-80	0	COL9A3	periocular mesenchyme
FABP5	2.74e-69	0.624253	0.948	0.766	5.42e-65	0	FABP5	periocular mesenchyme
SVIP	1.43e-42	0.613045	0.624	0.404	2.83e-38	0	SVIP	periocular mesenchyme
TSPO	4.23e-66	0.611738	0.626	0.327	8.36e-62	0	TSPO	periocular mesenchyme
FLRT3	4.53e-60	0.610881	0.624	0.337	8.95e-56	0	FLRT3	periocular mesenchyme
TIMP1	1.96e-83	0.608357	0.92	0.667	3.87e-79	0	TIMP1	periocular mesenchyme
ID1	2.83e-27	0.606209	0.798	0.658	5.59e-23	0	ID1	periocular mesenchyme
GLT8D2	1.13e-78	0.603908	0.698	0.365	2.24e-74	0	GLT8D2	periocular mesenchyme
MFAP2	1.83e-80	0.603685	0.952	0.644	3.62e-76	0	MFAP2	periocular mesenchyme
GAS2	1.52e-60	0.602625	0.579	0.286	3e-56	0	GAS2	periocular mesenchyme
CALU	1.28e-78	0.601413	0.949	0.716	2.53e-74	0	CALU	periocular mesenchyme
IGFBP5	1e-68	0.60106	0.934	0.648	1.98e-64	0	IGFBP5	periocular mesenchyme
DDIT4L	2.76e-138	0.597503	0.365	0.065	5.45e-134	0	DDIT4L	periocular mesenchyme
CTSK	1.81e-70	0.595025	0.754	0.435	3.58e-66	0	CTSK	periocular mesenchyme
SDC2	5.13e-69	0.591905	0.685	0.376	1.01e-64	0	SDC2	periocular mesenchyme
RSL24D1	1.81e-63	0.579618	0.932	0.759	3.57e-59	0	RSL24D1	periocular mesenchyme
IGFBP4	5.35e-73	0.576739	0.829	0.515	1.06e-68	0	IGFBP4	periocular mesenchyme
S100A11	2.28e-64	0.57105	0.985	0.771	4.5e-60	0	S100A11	periocular mesenchyme
SPATS2L	1.62e-66	0.568918	0.887	0.6	3.2e-62	0	SPATS2L	periocular mesenchyme
PTN	5.1e-26	0.568819	0.83	0.64	1.01e-21	0	PTN	periocular mesenchyme
ANXA2	2.23e-69	0.566618	0.95	0.719	4.4e-65	0	ANXA2	periocular mesenchyme
FOXC2	1.87e-91	0.56527	0.528	0.184	3.7e-87	0	FOXC2	periocular mesenchyme
PIEZO2	5.29e-74	0.561869	0.532	0.227	1.05e-69	0	PIEZO2	periocular mesenchyme
PPP3CA	7.67e-55	0.559203	0.681	0.421	1.52e-50	0	PPP3CA	periocular mesenchyme
CPED1	8.4e-76	0.559084	0.747	0.387	1.66e-71	0	CPED1	periocular mesenchyme
SOSTDC1	4.29e-82	0.554526	0.482	0.172	8.47e-78	0	SOSTDC1	periocular mesenchyme
GMDS	1.28e-68	0.540793	0.547	0.254	2.54e-64	0	GMDS	periocular mesenchyme
IGFBP2	6.95e-62	0.53785	0.981	0.829	1.37e-57	0	IGFBP2	periocular mesenchyme
ALCAM	9.61e-50	0.534028	0.622	0.358	1.9e-45	0	ALCAM	periocular mesenchyme
P4HB	1.24e-61	0.527255	0.86	0.646	2.45e-57	0	P4HB	periocular mesenchyme
CREB3L1	2.29e-91	0.526738	0.535	0.197	4.53e-87	0	CREB3L1	periocular mesenchyme
TPBG	7.04e-60	0.526622	0.739	0.435	1.39e-55	0	TPBG	periocular mesenchyme
EFNA5	6.2e-65	0.523593	0.744	0.446	1.22e-60	0	EFNA5	periocular mesenchyme
COL5A2	1.45e-58	0.520065	0.916	0.618	2.87e-54	0	COL5A2	periocular mesenchyme
GPX8	1.22e-54	0.519782	0.758	0.496	2.42e-50	0	GPX8	periocular mesenchyme
LURAP1L	3.49e-71	0.515147	0.347	0.112	6.9e-67	0	LURAP1L	periocular mesenchyme
EMP3	8.24e-59	0.512912	0.941	0.698	1.63e-54	0	EMP3	periocular mesenchyme
OSR2	5.81e-164	1.13876	0.847	0.336	1.15e-159	1	OSR2	corneal endothelium
POSTN	7.45e-102	1.11436	0.822	0.449	1.47e-97	1	POSTN	corneal endothelium
FOXL2	9.89e-170	0.983094	0.704	0.21	1.95e-165	1	FOXL2	corneal endothelium
TES	5.99e-78	0.904211	0.737	0.446	1.18e-73	1	TES	corneal endothelium
LUZP2	3.55e-68	0.883184	0.444	0.18	7.01e-64	1	LUZP2	corneal endothelium
SFRP2	6.83e-16	0.819963	0.608	0.506	1.35e-11	1	SFRP2	corneal endothelium
TSHZ2	2.11e-91	0.817364	0.563	0.226	4.17e-87	1	TSHZ2	corneal endothelium
CRLF1	6.5e-103	0.771546	0.32	0.065	1.28e-98	1	CRLF1	corneal endothelium
PLAT	1.38e-48	0.735997	0.513	0.264	2.73e-44	1	PLAT	corneal endothelium
DCN	6.3e-51	0.729706	0.963	0.795	1.24e-46	1	DCN	corneal endothelium
ITM2A	2.3e-30	0.717038	0.803	0.624	4.55e-26	1	ITM2A	corneal endothelium
NRP1	1.17e-62	0.709952	0.64	0.346	2.3e-58	1	NRP1	corneal endothelium
PDGFRA	1.95e-74	0.686275	0.854	0.529	3.86e-70	1	PDGFRA	corneal endothelium
DLK1	7.94e-44	0.660357	0.612	0.377	1.57e-39	1	DLK1	corneal endothelium
SULT1E1	4.63e-17	0.650265	0.463	0.32	9.14e-13	1	SULT1E1	corneal endothelium
MT-ND5	8.97e-96	0.646707	0.999	0.921	1.77e-91	1	MT-ND5	corneal endothelium
APCDD1	4.01e-50	0.64174	0.299	0.105	7.93e-46	1	APCDD1	corneal endothelium
PDGFRL	2.49e-61	0.633144	0.537	0.261	4.91e-57	1	PDGFRL	corneal endothelium
EDNRA	7.43e-60	0.62213	0.699	0.412	1.47e-55	1	EDNRA	corneal endothelium
NFIB	6.37e-60	0.614936	0.861	0.63	1.26e-55	1	NFIB	corneal endothelium
CXCL12	1.97e-42	0.613442	0.636	0.404	3.9e-38	1	CXCL12	corneal endothelium
FGF7	1.55e-45	0.602895	0.271	0.095	3.07e-41	1	FGF7	corneal endothelium
ALX1	1.63e-49	0.58076	0.501	0.255	3.22e-45	1	ALX1	corneal endothelium
RSPO2	3.34e-50	0.580118	0.254	0.077	6.61e-46	1	RSPO2	corneal endothelium
NBL1	1.72e-18	0.576612	0.409	0.278	3.39e-14	1	NBL1	corneal endothelium
MGST1	2.61e-49	0.57602	0.469	0.228	5.16e-45	1	MGST1	corneal endothelium
TGFBI	2.7e-53	0.57444	0.798	0.534	5.33e-49	1	TGFBI	corneal endothelium
ARID5B	8.51e-51	0.566339	0.674	0.429	1.68e-46	1	ARID5B	corneal endothelium
ANGPT1	4.57e-28	0.563392	0.358	0.19	9.04e-24	1	ANGPT1	corneal endothelium
LRRC17	8.43e-53	0.560986	0.777	0.485	1.66e-48	1	LRRC17	corneal endothelium
PRRX1	9.54e-61	0.560761	0.84	0.536	1.89e-56	1	PRRX1	corneal endothelium
PLAC9	2.03e-30	0.545403	0.801	0.602	4.01e-26	1	PLAC9	corneal endothelium
FBLN1	4.14e-47	0.542838	0.963	0.754	8.17e-43	1	FBLN1	corneal endothelium
SYNPO2	1.89e-55	0.537534	0.525	0.259	3.73e-51	1	SYNPO2	corneal endothelium
COL21A1	3.72e-35	0.535571	0.581	0.374	7.36e-31	1	COL21A1	corneal endothelium
WNT5A	4.73e-51	0.526581	0.539	0.284	9.34e-47	1	WNT5A	corneal endothelium
FBN1	1.84e-44	0.522659	0.711	0.48	3.63e-40	1	FBN1	corneal endothelium
FN1	1.82e-40	0.521791	0.837	0.616	3.6e-36	1	FN1	corneal endothelium
NCAM2	1.85e-62	0.51371	0.437	0.174	3.66e-58	1	NCAM2	corneal endothelium
NR2F2	1.26e-32	0.509201	0.694	0.512	2.48e-28	1	NR2F2	corneal endothelium
PCDH10	5.97e-46	0.506059	0.393	0.177	1.18e-41	1	PCDH10	corneal endothelium
MEG3	4.28e-41	0.501589	0.935	0.764	8.46e-37	1	MEG3	corneal endothelium
PLAT1	4.27e-131	1.31214	0.631	0.247	8.44e-127	2	PLAT	corneal endothelium
POSTN1	6.66e-122	1.27278	0.847	0.446	1.32e-117	2	POSTN	corneal endothelium
OSR21	2.36e-181	1.21514	0.857	0.335	4.66e-177	2	OSR2	corneal endothelium
DCN1	3.69e-91	1.02511	0.952	0.797	7.29e-87	2	DCN	corneal endothelium
CXCL121	6.57e-67	1.00257	0.662	0.4	1.3e-62	2	CXCL12	corneal endothelium
FOXL21	3.32e-132	0.997135	0.635	0.221	6.57e-128	2	FOXL2	corneal endothelium
SFRP21	6.52e-30	0.876235	0.654	0.499	1.29e-25	2	SFRP2	corneal endothelium
PTX3	9.9e-41	0.790291	0.411	0.209	1.96e-36	2	PTX3	corneal endothelium
SULT1E11	5.41e-33	0.774655	0.515	0.313	1.07e-28	2	SULT1E1	corneal endothelium
CPE	3.57e-50	0.773726	0.777	0.622	7.06e-46	2	CPE	corneal endothelium
NRP11	3.14e-53	0.769249	0.59	0.354	6.21e-49	2	NRP1	corneal endothelium
ANGPT11	3.38e-36	0.757751	0.373	0.188	6.67e-32	2	ANGPT1	corneal endothelium
PDGFRA1	2.38e-69	0.754264	0.794	0.538	4.71e-65	2	PDGFRA	corneal endothelium
MT-ND51	4.37e-106	0.73274	0.987	0.922	8.64e-102	2	MT-ND5	corneal endothelium
DLK11	6.48e-41	0.690821	0.59	0.381	1.28e-36	2	DLK1	corneal endothelium
TGFBI1	5.54e-50	0.678674	0.753	0.541	1.1e-45	2	TGFBI	corneal endothelium
MGST11	1.59e-43	0.676363	0.44	0.232	3.13e-39	2	MGST1	corneal endothelium
RSPO21	2.44e-74	0.676007	0.288	0.072	4.83e-70	2	RSPO2	corneal endothelium
SPRY1	8.72e-38	0.668397	0.583	0.383	1.72e-33	2	SPRY1	corneal endothelium
ISLR	8.08e-43	0.633044	0.495	0.295	1.6e-38	2	ISLR	corneal endothelium
PRRX11	2.24e-50	0.610481	0.777	0.546	4.42e-46	2	PRRX1	corneal endothelium
OSR1	2.9e-69	0.609467	0.37	0.125	5.73e-65	2	OSR1	corneal endothelium
FAM110B	2.01e-39	0.605275	0.549	0.361	3.98e-35	2	FAM110B	corneal endothelium
STOM	1.14e-35	0.601972	0.462	0.281	2.26e-31	2	STOM	corneal endothelium
LTBP4	1.59e-36	0.60122	0.641	0.465	3.15e-32	2	LTBP4	corneal endothelium
TES1	1.56e-41	0.599483	0.651	0.459	3.07e-37	2	TES	corneal endothelium
TSHZ21	8.38e-45	0.595458	0.467	0.241	1.66e-40	2	TSHZ2	corneal endothelium
TGFBR3	2.12e-59	0.593414	0.39	0.158	4.2e-55	2	TGFBR3	corneal endothelium
TBX15	1.35e-48	0.586806	0.396	0.178	2.67e-44	2	TBX15	corneal endothelium
PRSS23	1.35e-27	0.576468	0.577	0.42	2.67e-23	2	PRSS23	corneal endothelium
LRRC171	4.59e-39	0.571403	0.706	0.496	9.07e-35	2	LRRC17	corneal endothelium
EBF1	3.99e-44	0.57068	0.607	0.365	7.88e-40	2	EBF1	corneal endothelium
NCAM21	2.53e-40	0.570289	0.377	0.183	5.01e-36	2	NCAM2	corneal endothelium
NOV	7.85e-26	0.567997	0.244	0.111	1.55e-21	2	NOV	corneal endothelium
NFIB1	5.32e-40	0.567646	0.803	0.639	1.05e-35	2	NFIB	corneal endothelium
TMEFF2	1.52e-19	0.5675	0.258	0.144	3e-15	2	TMEFF2	corneal endothelium
FGF71	1.9e-53	0.556571	0.285	0.093	3.76e-49	2	FGF7	corneal endothelium
TXNIP	1.03e-26	0.555747	0.582	0.445	2.03e-22	2	TXNIP	corneal endothelium
NR2F21	9.25e-23	0.555006	0.638	0.52	1.83e-18	2	NR2F2	corneal endothelium
CTSC	6.41e-18	0.543247	0.498	0.375	1.27e-13	2	CTSC	corneal endothelium
ITM2A1	6.13e-20	0.536653	0.756	0.632	1.21e-15	2	ITM2A	corneal endothelium
EPHA4	7.4e-33	0.535679	0.424	0.251	1.46e-28	2	EPHA4	corneal endothelium
FBLN11	7.08e-42	0.533462	0.921	0.76	1.4e-37	2	FBLN1	corneal endothelium
ALX11	2.45e-19	0.527612	0.4	0.271	4.84e-15	2	ALX1	corneal endothelium
FAP	6.72e-41	0.526095	0.454	0.242	1.33e-36	2	FAP	corneal endothelium
ARHGAP24	2.41e-34	0.525369	0.377	0.2	4.77e-30	2	ARHGAP24	corneal endothelium
ARID5B1	5.28e-26	0.522959	0.58	0.444	1.04e-21	2	ARID5B	corneal endothelium
LUZP21	1.39e-27	0.517007	0.357	0.194	2.74e-23	2	LUZP2	corneal endothelium
IGF2.1	5.09e-24	0.508339	0.441	0.303	1.01e-19	2	IGF2.1	corneal endothelium
PDGFRL1	4.19e-27	0.501908	0.44	0.276	8.29e-23	2	PDGFRL	corneal endothelium
EPHA7	2.08e-33	0.501353	0.416	0.231	4.11e-29	2	EPHA7	corneal endothelium
ITM2A2	6.73e-75	1.30597	0.865	0.62	1.33e-70	3	ITM2A	corneal endothelium
DCN2	1.82e-85	1.20575	0.962	0.799	3.61e-81	3	DCN	corneal endothelium
PLAC91	3.38e-88	1.19368	0.895	0.594	6.68e-84	3	PLAC9	corneal endothelium
TWIST1	3.12e-76	1.17047	0.859	0.55	6.16e-72	3	TWIST1	corneal endothelium
S100A10	2.57e-67	1.06116	0.842	0.599	5.09e-63	3	S100A10	corneal endothelium
CTHRC11	3.02e-78	1.03892	0.8	0.46	5.98e-74	3	CTHRC1	corneal endothelium
LUM1	3.07e-47	1.00797	0.864	0.654	6.06e-43	3	LUM	corneal endothelium
COL1A11	2.95e-103	0.986932	1	0.847	5.83e-99	3	COL1A1	corneal endothelium
FSTL1	2.37e-80	0.986024	0.897	0.681	4.69e-76	3	FSTL1	corneal endothelium
VIM	2.38e-133	0.941986	1	0.991	4.7e-129	3	VIM	corneal endothelium
FBLN12	9.74e-90	0.913947	0.959	0.759	1.93e-85	3	FBLN1	corneal endothelium
MGP1	7.44e-41	0.901847	0.796	0.566	1.47e-36	3	MGP	corneal endothelium
ZFP36	5.18e-32	0.854668	0.614	0.413	1.02e-27	3	ZFP36	corneal endothelium
COL5A1	9.06e-84	0.812096	0.9	0.592	1.79e-79	3	COL5A1	corneal endothelium
SOCS3	3.55e-53	0.780387	0.713	0.437	7.02e-49	3	SOCS3	corneal endothelium
COL3A11	2.54e-67	0.768466	0.987	0.84	5.01e-63	3	COL3A1	corneal endothelium
MXRA5	6.37e-55	0.752026	0.601	0.332	1.26e-50	3	MXRA5	corneal endothelium
PTX31	6.17e-26	0.738262	0.391	0.216	1.22e-21	3	PTX3	corneal endothelium
PMP22	4.03e-59	0.70851	0.844	0.581	7.96e-55	3	PMP22	corneal endothelium
COL6A2	1.86e-67	0.703878	0.941	0.659	3.68e-63	3	COL6A2	corneal endothelium
EDNRA1	1.39e-71	0.698196	0.752	0.412	2.75e-67	3	EDNRA	corneal endothelium
AKAP12	6.02e-27	0.695618	0.747	0.613	1.19e-22	3	AKAP12	corneal endothelium
COL1A21	2.03e-78	0.691588	1	0.887	4e-74	3	COL1A2	corneal endothelium
LGALS11	7.77e-76	0.681166	1	0.93	1.54e-71	3	LGALS1	corneal endothelium
TGFBI2	1.69e-59	0.668733	0.821	0.537	3.34e-55	3	TGFBI	corneal endothelium
COL6A1	2.79e-57	0.65935	0.903	0.671	5.52e-53	3	COL6A1	corneal endothelium
TES2	7.58e-46	0.653484	0.698	0.457	1.5e-41	3	TES	corneal endothelium
DKK2	4.28e-39	0.65115	0.468	0.237	8.46e-35	3	DKK2	corneal endothelium
IGFBP51	1.74e-22	0.646419	0.841	0.667	3.43e-18	3	IGFBP5	corneal endothelium
NBL11	9.5e-45	0.640555	0.507	0.269	1.88e-40	3	NBL1	corneal endothelium
POSTN2	5.25e-36	0.635009	0.708	0.471	1.04e-31	3	POSTN	corneal endothelium
C2orf401	9.31e-36	0.630114	0.601	0.368	1.84e-31	3	C2orf40	corneal endothelium
CREB5	6.87e-43	0.624698	0.706	0.492	1.36e-38	3	CREB5	corneal endothelium
THBS4	4.84e-30	0.618828	0.246	0.098	9.57e-26	3	THBS4	corneal endothelium
S100A6	5.03e-53	0.61813	0.865	0.697	9.93e-49	3	S100A6	corneal endothelium
SPARC1	1.18e-65	0.61251	0.987	0.846	2.32e-61	3	SPARC	corneal endothelium
COL5A21	3.73e-51	0.595089	0.895	0.628	7.38e-47	3	COL5A2	corneal endothelium
JUNB	1.25e-26	0.589683	0.767	0.607	2.47e-22	3	JUNB	corneal endothelium
OSR22	4.08e-42	0.588596	0.655	0.37	8.07e-38	3	OSR2	corneal endothelium
TWIST2	6.03e-25	0.579071	0.516	0.315	1.19e-20	3	TWIST2	corneal endothelium
MMP21	6.49e-52	0.572724	0.775	0.498	1.28e-47	3	MMP2	corneal endothelium
EGR1	1.47e-36	0.57055	0.913	0.705	2.9e-32	3	EGR1	corneal endothelium
AHNAK	2.84e-41	0.565864	0.742	0.519	5.61e-37	3	AHNAK	corneal endothelium
PPIC	9.19e-35	0.556315	0.588	0.369	1.82e-30	3	PPIC	corneal endothelium
FOS	9.12e-33	0.552819	0.936	0.785	1.8e-28	3	FOS	corneal endothelium
DLK12	5.85e-23	0.547896	0.557	0.389	1.16e-18	3	DLK1	corneal endothelium
CRABP21	1.24e-48	0.534725	0.915	0.654	2.46e-44	3	CRABP2	corneal endothelium
FN11	1.94e-38	0.526407	0.856	0.618	3.83e-34	3	FN1	corneal endothelium
PTN1	5.19e-13	0.526232	0.773	0.652	1.03e-08	3	PTN	corneal endothelium
S100A111	6.98e-44	0.519596	0.966	0.779	1.38e-39	3	S100A11	corneal endothelium
LY6E	6.48e-40	0.515	0.818	0.599	1.28e-35	3	LY6E	corneal endothelium
BMP3	1.07e-24	0.512054	0.36	0.196	2.11e-20	3	BMP3	corneal endothelium
PDGFRL2	1.8e-42	0.505348	0.527	0.268	3.56e-38	3	PDGFRL	corneal endothelium
GAS1	9.47e-34	0.500586	0.764	0.542	1.87e-29	3	GAS1	corneal endothelium
CKB	7e-214	3.73028	0.974	0.463	1.38e-209	4	CKB	RPCs
DAPL1	2.93e-240	2.66215	0.717	0.119	5.79e-236	4	DAPL1	RPCs
SOX2	0	2.4731	0.697	0.054	0	4	SOX2	RPCs
CRABP1	7.34e-154	2.38891	0.963	0.673	1.45e-149	4	CRABP1	RPCs
RAX	0	2.23312	0.74	0.071	0	4	RAX	RPCs
HES5	3.4e-166	2.19041	0.491	0.068	6.72e-162	4	HES5	RPCs
SIX6	0	2.10727	0.683	0.069	0	4	SIX6	RPCs
RORB	9.52e-137	2.08223	0.723	0.225	1.88e-132	4	RORB	RPCs
MAB21L1	1.04e-177	2.02825	0.737	0.178	2.06e-173	4	MAB21L1	RPCs
HMGB2	1.04e-75	2.00477	0.831	0.63	2.05e-71	4	HMGB2	RPCs
TTYH1	1.94e-223	1.86448	0.6	0.079	3.83e-219	4	TTYH1	RPCs
HMX1	5.5e-207	1.85345	0.566	0.073	1.09e-202	4	HMX1	RPCs
PAX6	4.56e-192	1.83247	0.789	0.165	9.02e-188	4	PAX6	RPCs
CCND1	3.19e-66	1.79983	0.726	0.52	6.3e-62	4	CCND1	RPCs
METRN	1.14e-112	1.75005	0.657	0.21	2.26e-108	4	METRN	RPCs
HMGA1	9.49e-108	1.72532	0.729	0.315	1.88e-103	4	HMGA1	RPCs
HES6	1.76e-56	1.62936	0.414	0.13	3.49e-52	4	HES6	RPCs
SFRP22	9.44e-75	1.61953	0.82	0.499	1.87e-70	4	SFRP2	RPCs
ATOH7	6.16e-38	1.60634	0.234	0.058	1.22e-33	4	ATOH7	RPCs
H2AFZ	8.35e-96	1.58061	0.926	0.825	1.65e-91	4	H2AFZ	RPCs
TOP2A	5.72e-40	1.53612	0.46	0.199	1.13e-35	4	TOP2A	RPCs
ALDH1A1	1.44e-21	1.53299	0.206	0.072	2.85e-17	4	ALDH1A1	RPCs
ZIC2	1.07e-221	1.52977	0.566	0.064	2.11e-217	4	ZIC2	RPCs
HIST1H4C	1.05e-22	1.51274	0.674	0.629	2.07e-18	4	HIST1H4C	RPCs
FZD5	1.94e-243	1.48645	0.506	0.043	3.83e-239	4	FZD5	RPCs
TMSB15A	2.6e-82	1.48492	0.811	0.518	5.13e-78	4	TMSB15A	RPCs
UBE2C	2.19e-45	1.46149	0.431	0.156	4.33e-41	4	UBE2C	RPCs
ASCL1	2e-192	1.40547	0.386	0.029	3.95e-188	4	ASCL1	RPCs
PTTG1	1.91e-33	1.40075	0.469	0.237	3.78e-29	4	PTTG1	RPCs
CKS2	1.4e-38	1.3945	0.589	0.345	2.77e-34	4	CKS2	RPCs
BEX1	3.09e-54	1.38798	0.614	0.297	6.11e-50	4	BEX1	RPCs
CCNB2	1.42e-54	1.32456	0.406	0.128	2.81e-50	4	CCNB2	RPCs
PCNA	2.09e-39	1.27765	0.526	0.279	4.12e-35	4	PCNA	RPCs
TYMS	7.12e-67	1.24711	0.534	0.188	1.41e-62	4	TYMS	RPCs
CDH2	6.82e-73	1.24333	0.58	0.219	1.35e-68	4	CDH2	RPCs
CENPV	1.32e-48	1.22475	0.686	0.473	2.61e-44	4	CENPV	RPCs
UBE2S	8.37e-11	1.21677	0.56	0.525	1.65e-06	4	UBE2S	RPCs
CENPF	1.92e-29	1.216	0.4	0.181	3.8e-25	4	CENPF	RPCs
HES1	9.32e-50	1.20476	0.78	0.546	1.84e-45	4	HES1	RPCs
GPM6A	6.85e-126	1.19377	0.54	0.105	1.35e-121	4	GPM6A	RPCs
MSI1	1.21e-103	1.18583	0.523	0.13	2.4e-99	4	MSI1	RPCs
SIX3	1.9e-122	1.17087	0.591	0.125	3.75e-118	4	SIX3	RPCs
CCDC34	4.65e-31	1.17034	0.574	0.396	9.18e-27	4	CCDC34	RPCs
CCNB1	2.59e-31	1.16966	0.323	0.12	5.12e-27	4	CCNB1	RPCs
MAD2L1	3.72e-48	1.16353	0.451	0.168	7.35e-44	4	MAD2L1	RPCs
MGARP	4.81e-121	1.15465	0.434	0.071	9.5e-117	4	MGARP	RPCs
TUBA1B	4.82e-60	1.15433	0.926	0.92	9.52e-56	4	TUBA1B	RPCs
TUBB4B	7.82e-18	1.13327	0.609	0.518	1.54e-13	4	TUBB4B	RPCs
FEZF2	1.02e-200	1.13325	0.406	0.031	2.01e-196	4	FEZF2	RPCs
VSX2	6.62e-253	1.1274	0.406	0.021	1.31e-248	4	VSX2	RPCs
SNRPG	7.8e-52	1.11597	0.789	0.755	1.54e-47	4	SNRPG	RPCs
NUSAP1	2.69e-45	1.0954	0.411	0.141	5.33e-41	4	NUSAP1	RPCs
MSI2	4.68e-31	1.08496	0.569	0.391	9.24e-27	4	MSI2	RPCs
DEK	1.25e-43	1.0822	0.766	0.695	2.47e-39	4	DEK	RPCs
LINC01833	1.44e-130	1.07564	0.44	0.066	2.84e-126	4	LINC01833	RPCs
H2AFX	2.73e-31	1.07264	0.469	0.244	5.39e-27	4	H2AFX	RPCs
CKS1B	5.26e-25	1.0586	0.591	0.436	1.04e-20	4	CKS1B	RPCs
TBX2-AS1	2.39e-111	1.04168	0.437	0.079	4.72e-107	4	TBX2-AS1	RPCs
UBE2T	3.99e-48	1.03481	0.434	0.158	7.88e-44	4	UBE2T	RPCs
LHX2	4.69e-206	1.02817	0.434	0.036	9.27e-202	4	LHX2	RPCs
TBX2	4.03e-74	1.01835	0.426	0.109	7.96e-70	4	TBX2	RPCs
CDK1	5.18e-44	1.00297	0.403	0.14	1.02e-39	4	CDK1	RPCs
CHD7	6.98e-65	1.00285	0.443	0.135	1.38e-60	4	CHD7	RPCs
H1FX	1.66e-34	1.00015	0.817	0.82	3.28e-30	4	H1FX	RPCs
RPA3	8.63e-29	0.98531	0.537	0.343	1.71e-24	4	RPA3	RPCs
SLF1	4.51e-51	0.98432	0.429	0.154	8.9e-47	4	SLF1	RPCs
HMGB3	2.44e-24	0.983177	0.56	0.397	4.82e-20	4	HMGB3	RPCs
KPNA2	1.11e-16	0.980419	0.417	0.26	2.19e-12	4	KPNA2	RPCs
RBP1	1.87e-35	0.972577	0.823	0.791	3.69e-31	4	RBP1	RPCs
DKK3	1.16e-36	0.966371	0.514	0.275	2.28e-32	4	DKK3	RPCs
AL139246.5	3.46e-94	0.963721	0.269	0.032	6.85e-90	4	AL139246.5	RPCs
SOX9	3.86e-40	0.960244	0.394	0.152	7.64e-36	4	SOX9	RPCs
SOX11	2.32e-25	0.959209	0.651	0.525	4.58e-21	4	SOX11	RPCs
ODC1	1.2e-33	0.950207	0.703	0.553	2.37e-29	4	ODC1	RPCs
CLU	1.74e-37	0.939724	0.654	0.437	3.43e-33	4	CLU	RPCs
SPP1	6.99e-117	0.922263	0.446	0.078	1.38e-112	4	SPP1	RPCs
TRH	6.47e-77	0.921362	0.297	0.049	1.28e-72	4	TRH	RPCs
ISYNA1	1.61e-33	0.919152	0.5	0.276	3.18e-29	4	ISYNA1	RPCs
BIRC5	3.75e-39	0.91117	0.351	0.119	7.41e-35	4	BIRC5	RPCs
HES4	8.02e-20	0.910679	0.557	0.389	1.58e-15	4	HES4	RPCs
MIS18BP1	1.85e-21	0.907968	0.391	0.215	3.66e-17	4	MIS18BP1	RPCs
LGR4	2.28e-45	0.907958	0.423	0.166	4.51e-41	4	LGR4	RPCs
FABP7	1.94e-69	0.902541	0.3	0.055	3.83e-65	4	FABP7	RPCs
MCM7	2.34e-39	0.900372	0.46	0.205	4.62e-35	4	MCM7	RPCs
AURKB	1.47e-50	0.899441	0.343	0.094	2.91e-46	4	AURKB	RPCs
FZD3	9.9e-32	0.895103	0.446	0.227	1.96e-27	4	FZD3	RPCs
SNRPB	6.75e-28	0.891578	0.703	0.65	1.33e-23	4	SNRPB	RPCs
CYP1B1	0.00772422	0.889734	0.417	0.442	1	4	CYP1B1	RPCs
DAAM1	9.04e-23	0.884131	0.543	0.381	1.79e-18	4	DAAM1	RPCs
LMNB1	1.08e-30	0.879111	0.403	0.19	2.13e-26	4	LMNB1	RPCs
NEUROD1	6.53e-28	0.876926	0.157	0.036	1.29e-23	4	NEUROD1	RPCs
RANBP1	2.54e-32	0.876138	0.749	0.737	5.02e-28	4	RANBP1	RPCs
RAN	4.38e-41	0.872519	0.84	0.863	8.65e-37	4	RAN	RPCs
PSIP1	7.36e-19	0.868187	0.651	0.626	1.45e-14	4	PSIP1	RPCs
PTPRZ1	1.15e-73	0.867123	0.383	0.086	2.28e-69	4	PTPRZ1	RPCs
CDC20	4.02e-36	0.865724	0.26	0.072	7.94e-32	4	CDC20	RPCs
FADS1	6.86e-35	0.863713	0.471	0.231	1.36e-30	4	FADS1	RPCs
CRB1	3.52e-157	0.860754	0.337	0.028	6.96e-153	4	CRB1	RPCs
SINHCAF	6.61e-27	0.852621	0.56	0.385	1.31e-22	4	SINHCAF	RPCs
GINS2	3.67e-43	0.8475	0.423	0.16	7.26e-39	4	GINS2	RPCs
DCBLD2	9.97e-32	0.842269	0.449	0.226	1.97e-27	4	DCBLD2	RPCs
ZFP36L2	2.83e-22	0.841695	0.743	0.696	5.6e-18	4	ZFP36L2	RPCs
PCLAF	2.38e-25	0.840953	0.469	0.243	4.7e-21	4	PCLAF	RPCs
ENO1	4.21e-28	0.838547	0.743	0.692	8.32e-24	4	ENO1	RPCs
ARL6IP1	2.17e-06	0.838499	0.489	0.446	0.0427875	4	ARL6IP1	RPCs
NASP	1.38e-21	0.828677	0.711	0.715	2.73e-17	4	NASP	RPCs
TPX2	2.11e-32	0.826947	0.329	0.118	4.18e-28	4	TPX2	RPCs
HMGB1	8.75e-55	0.807931	0.974	0.965	1.73e-50	4	HMGB1	RPCs
MEIS1	4.93e-87	0.803561	0.369	0.07	9.75e-83	4	MEIS1	RPCs
PPA1	7.66e-23	0.794346	0.631	0.517	1.51e-18	4	PPA1	RPCs
DTYMK	7.55e-15	0.789739	0.451	0.312	1.49e-10	4	DTYMK	RPCs
HELLS	1.44e-19	0.782523	0.44	0.28	2.85e-15	4	HELLS	RPCs
DDIT4	1.21e-16	0.766406	0.483	0.323	2.39e-12	4	DDIT4	RPCs
COL2A1	1.1e-25	0.76522	0.391	0.195	2.17e-21	4	COL2A1	RPCs
SRP9	2.2e-34	0.757084	0.803	0.831	4.35e-30	4	SRP9	RPCs
HMGN2	5.38e-26	0.75705	0.894	0.917	1.06e-21	4	HMGN2	RPCs
DLGAP5	2.96e-33	0.756305	0.277	0.086	5.86e-29	4	DLGAP5	RPCs
PHYHIPL	3.25e-72	0.756017	0.386	0.088	6.42e-68	4	PHYHIPL	RPCs
DIO3	2.59e-76	0.75062	0.231	0.029	5.11e-72	4	DIO3	RPCs
MYB	1.27e-156	0.74989	0.314	0.023	2.52e-152	4	MYB	RPCs
NR2F1	8.11e-14	0.749468	0.589	0.44	1.6e-09	4	NR2F1	RPCs
PBK	4.01e-33	0.745729	0.289	0.094	7.93e-29	4	PBK	RPCs
HIST1H1D	8.02e-15	0.743491	0.366	0.217	1.59e-10	4	HIST1H1D	RPCs
SMC4	4.81e-18	0.741151	0.386	0.22	9.5e-14	4	SMC4	RPCs
CENPH	1.09e-28	0.735804	0.343	0.143	2.15e-24	4	CENPH	RPCs
ARL6IP6	7.86e-20	0.735075	0.451	0.276	1.55e-15	4	ARL6IP6	RPCs
RAB31	2.42e-30	0.732583	0.38	0.165	4.77e-26	4	RAB31	RPCs
FOXD1	2.1e-21	0.731937	0.28	0.123	4.15e-17	4	FOXD1	RPCs
CXXC5	6e-33	0.731024	0.477	0.234	1.19e-28	4	CXXC5	RPCs
LSM4	2.44e-19	0.730795	0.646	0.561	4.82e-15	4	LSM4	RPCs
DUT	6.27e-10	0.725451	0.623	0.637	1.24e-05	4	DUT	RPCs
CKAP2	1.07e-19	0.724132	0.326	0.156	2.12e-15	4	CKAP2	RPCs
TMEM123	3.98e-20	0.723732	0.429	0.252	7.86e-16	4	TMEM123	RPCs
NEK2	1.7e-45	0.722699	0.24	0.052	3.35e-41	4	NEK2	RPCs
TOX	7.73e-38	0.713761	0.383	0.145	1.53e-33	4	TOX	RPCs
TUBB2B	2.02e-69	0.710589	0.891	0.678	4e-65	4	TUBB2B	RPCs
CALM2	9.33e-50	0.705491	0.934	0.945	1.84e-45	4	CALM2	RPCs
FGF9	1.02e-57	0.703322	0.337	0.084	2.02e-53	4	FGF9	RPCs
NKAIN4	2.73e-28	0.702181	0.477	0.251	5.39e-24	4	NKAIN4	RPCs
GAPDH	5.75e-64	0.699659	0.98	0.985	1.14e-59	4	GAPDH	RPCs
PUF60	1.22e-12	0.698482	0.58	0.541	2.4e-08	4	PUF60	RPCs
NUCKS1	4.13e-23	0.691626	0.869	0.896	8.17e-19	4	NUCKS1	RPCs
HNRNPD	5.57e-15	0.685304	0.726	0.759	1.1e-10	4	HNRNPD	RPCs
ZIC1	6.94e-85	0.685277	0.211	0.021	1.37e-80	4	ZIC1	RPCs
CENPU	3.8e-37	0.682286	0.354	0.124	7.51e-33	4	CENPU	RPCs
LCA5	7.66e-23	0.681303	0.3	0.128	1.51e-18	4	LCA5	RPCs
DBI	1.95e-15	0.680166	0.691	0.695	3.85e-11	4	DBI	RPCs
PTMA	7.31e-60	0.678441	0.997	0.991	1.44e-55	4	PTMA	RPCs
HIST1H1B	3.05e-26	0.676697	0.203	0.059	6.03e-22	4	HIST1H1B	RPCs
MAZ	1.06e-13	0.675915	0.597	0.539	2.1e-09	4	MAZ	RPCs
WDR54	6.63e-29	0.674683	0.426	0.203	1.31e-24	4	WDR54	RPCs
HOMER2	3.48e-53	0.66926	0.303	0.073	6.88e-49	4	HOMER2	RPCs
TMPO	6.24e-12	0.668382	0.563	0.501	1.23e-07	4	TMPO	RPCs
NAP1L1	1.18e-31	0.668322	0.891	0.921	2.33e-27	4	NAP1L1	RPCs
TCTEX1D2	1.11e-13	0.666136	0.431	0.297	2.19e-09	4	TCTEX1D2	RPCs
PLEKHA1	1.3e-14	0.663964	0.386	0.248	2.56e-10	4	PLEKHA1	RPCs
ZWINT	4.12e-28	0.661632	0.306	0.113	8.14e-24	4	ZWINT	RPCs
SELENOP	1.71e-23	0.660721	0.4	0.193	3.38e-19	4	SELENOP	RPCs
DCTPP1	5.44e-08	0.659247	0.363	0.266	0.0010755	4	DCTPP1	RPCs
SLC2A1	2.14e-32	0.655663	0.426	0.194	4.24e-28	4	SLC2A1	RPCs
ANP32E	1.86e-09	0.654925	0.543	0.498	3.68e-05	4	ANP32E	RPCs
ELP4	4.2e-19	0.654818	0.403	0.226	8.3e-15	4	ELP4	RPCs
AC010931.2	5.83e-53	0.653426	0.266	0.055	1.15e-48	4	AC010931.2	RPCs
CHEK1	1.43e-38	0.653329	0.34	0.115	2.82e-34	4	CHEK1	RPCs
SYT1	1.55e-40	0.651957	0.406	0.142	3.07e-36	4	SYT1	RPCs
H2AFV	1.2e-11	0.648964	0.629	0.624	2.37e-07	4	H2AFV	RPCs
FBXW7	8.47e-25	0.647771	0.334	0.146	1.67e-20	4	FBXW7	RPCs
H2AFY	3.98e-11	0.647517	0.589	0.59	7.87e-07	4	H2AFY	RPCs
CLRN1	2.17e-167	0.647376	0.291	0.017	4.28e-163	4	CLRN1	RPCs
MZT1	8.6e-10	0.64595	0.417	0.313	1.7e-05	4	MZT1	RPCs
NNAT	2.18e-11	0.644162	0.537	0.41	4.3e-07	4	NNAT	RPCs
CDCA3	1.13e-33	0.641777	0.249	0.07	2.23e-29	4	CDCA3	RPCs
UHRF1	6.74e-26	0.638754	0.263	0.093	1.33e-21	4	UHRF1	RPCs
SRSF7	2.18e-15	0.638238	0.691	0.706	4.31e-11	4	SRSF7	RPCs
GMNN	2.68e-24	0.631708	0.391	0.188	5.3e-20	4	GMNN	RPCs
EML1	3.67e-26	0.631422	0.323	0.137	7.25e-22	4	EML1	RPCs
PKM	1.15e-13	0.629299	0.674	0.61	2.27e-09	4	PKM	RPCs
HIST1H1C	7.19e-12	0.628425	0.351	0.217	1.42e-07	4	HIST1H1C	RPCs
CDKN3	3.91e-20	0.627051	0.26	0.104	7.73e-16	4	CDKN3	RPCs
HNRNPF	5.74e-10	0.624212	0.569	0.578	1.14e-05	4	HNRNPF	RPCs
CDCA7L	4.89e-35	0.621933	0.294	0.094	9.66e-31	4	CDCA7L	RPCs
FGF19	7.71e-151	0.621909	0.229	0.01	1.52e-146	4	FGF19	RPCs
STMN1	1.38e-44	0.620267	0.971	0.966	2.73e-40	4	STMN1	RPCs
RAD21	1.44e-05	0.618691	0.54	0.554	0.284145	4	RAD21	RPCs
GTSE1	1.24e-31	0.618647	0.249	0.073	2.44e-27	4	GTSE1	RPCs
HSP90AA1	3.33e-35	0.617993	0.963	0.958	6.59e-31	4	HSP90AA1	RPCs
SRSF9	8.86e-21	0.616115	0.774	0.835	1.75e-16	4	SRSF9	RPCs
SNRPF	4.13e-19	0.614332	0.783	0.83	8.16e-15	4	SNRPF	RPCs
PARP1	9.53e-08	0.610273	0.489	0.447	0.00188366	4	PARP1	RPCs
ARRDC3	2.03e-11	0.609933	0.611	0.582	4e-07	4	ARRDC3	RPCs
KLHL23	3.64e-15	0.60603	0.417	0.263	7.2e-11	4	KLHL23	RPCs
RTKN2	2.32e-23	0.599935	0.254	0.095	4.58e-19	4	RTKN2	RPCs
MEST	4.17e-11	0.596351	0.637	0.645	8.25e-07	4	MEST	RPCs
GPX4	2.04e-16	0.594801	0.794	0.872	4.02e-12	4	GPX4	RPCs
SHROOM3	1.21e-25	0.592229	0.26	0.093	2.4e-21	4	SHROOM3	RPCs
C16orf45	2.63e-10	0.590099	0.434	0.327	5.2e-06	4	C16orf45	RPCs
HNRNPAB	7.24e-09	0.589319	0.549	0.51	0.000143093	4	HNRNPAB	RPCs
PAIP2	8.42e-16	0.589058	0.691	0.711	1.66e-11	4	PAIP2	RPCs
OARD1	3.88e-13	0.588989	0.42	0.283	7.66e-09	4	OARD1	RPCs
CCNA2	1.59e-29	0.586526	0.274	0.091	3.15e-25	4	CCNA2	RPCs
HNRNPA2B1	7.19e-27	0.586507	0.906	0.941	1.42e-22	4	HNRNPA2B1	RPCs
ACTL6A	9.78e-08	0.586182	0.417	0.336	0.00193194	4	ACTL6A	RPCs
FKBP3	2.78e-08	0.585926	0.631	0.648	0.000548537	4	FKBP3	RPCs
MCM3	9.48e-14	0.585104	0.346	0.203	1.87e-09	4	MCM3	RPCs
KNSTRN	7.62e-15	0.584794	0.243	0.113	1.51e-10	4	KNSTRN	RPCs
PEBP1	7.7e-22	0.584764	0.809	0.868	1.52e-17	4	PEBP1	RPCs
MIAT	1.33e-28	0.583919	0.3	0.104	2.63e-24	4	MIAT	RPCs
ACYP1	5.54e-14	0.583122	0.437	0.293	1.09e-09	4	ACYP1	RPCs
ARL3	1.72e-07	0.581032	0.577	0.576	0.0033923	4	ARL3	RPCs
YBX1	1.78e-30	0.580454	0.926	0.961	3.52e-26	4	YBX1	RPCs
TFDP2	3.68e-07	0.579326	0.491	0.455	0.00728064	4	TFDP2	RPCs
NUF2	4.88e-33	0.579301	0.249	0.071	9.64e-29	4	NUF2	RPCs
APEX1	1.32e-10	0.575306	0.703	0.74	2.61e-06	4	APEX1	RPCs
PITPNM1	3.36e-61	0.57437	0.266	0.049	6.64e-57	4	PITPNM1	RPCs
AHI1	1.73e-11	0.573613	0.4	0.273	3.41e-07	4	AHI1	RPCs
FRMD4B	2.48e-25	0.572446	0.286	0.11	4.89e-21	4	FRMD4B	RPCs
RMI2	2.13e-19	0.571297	0.283	0.126	4.2e-15	4	RMI2	RPCs
ECT2	3.94e-26	0.57019	0.246	0.082	7.79e-22	4	ECT2	RPCs
FDPS	1.08e-07	0.570098	0.526	0.486	0.00213569	4	FDPS	RPCs
ERICH5	1.52e-107	0.567471	0.269	0.027	3.01e-103	4	ERICH5	RPCs
HDGF	4.21e-05	0.564866	0.46	0.441	0.832104	4	HDGF	RPCs
CTXN1	6.61e-14	0.563994	0.346	0.205	1.31e-09	4	CTXN1	RPCs
PHIP	2.89e-06	0.562828	0.48	0.47	0.0570731	4	PHIP	RPCs
CENPM	2.07e-32	0.562302	0.28	0.089	4.09e-28	4	CENPM	RPCs
BUB3	0.00147483	0.561473	0.386	0.369	1	4	BUB3	RPCs
RFC5	1.76e-33	0.560286	0.28	0.088	3.48e-29	4	RFC5	RPCs
YEATS4	3.25e-12	0.559623	0.349	0.217	6.43e-08	4	YEATS4	RPCs
RARRES2	2.81e-10	0.559235	0.431	0.312	5.56e-06	4	RARRES2	RPCs
ILDR2	5.53e-106	0.558167	0.269	0.027	1.09e-101	4	ILDR2	RPCs
DACH1	2.52e-08	0.558057	0.437	0.332	0.000498948	4	DACH1	RPCs
ID4	1.78e-07	0.557539	0.446	0.361	0.00351648	4	ID4	RPCs
FEN1	5.35e-31	0.557279	0.249	0.075	1.06e-26	4	FEN1	RPCs
MND1	2.45e-21	0.554146	0.274	0.112	4.85e-17	4	MND1	RPCs
SNRPD1	1.11e-08	0.553798	0.691	0.769	0.00021839	4	SNRPD1	RPCs
DHFR	8.98e-23	0.553791	0.274	0.11	1.77e-18	4	DHFR	RPCs
SPC25	3.3e-28	0.553779	0.251	0.081	6.53e-24	4	SPC25	RPCs
FBXO5	2.89e-11	0.553194	0.254	0.136	5.7e-07	4	FBXO5	RPCs
SRSF3	2.68e-19	0.55238	0.84	0.892	5.29e-15	4	SRSF3	RPCs
SET	6.93e-17	0.551012	0.837	0.898	1.37e-12	4	SET	RPCs
CENPA	4.27e-30	0.550738	0.206	0.054	8.44e-26	4	CENPA	RPCs
FIGN	1.6e-11	0.550384	0.334	0.214	3.16e-07	4	FIGN	RPCs
TK1	1.78e-23	0.54975	0.249	0.089	3.51e-19	4	TK1	RPCs
AL590617.2	1.87e-70	0.549737	0.249	0.037	3.69e-66	4	AL590617.2	RPCs
EXOSC8	5.75e-08	0.547623	0.451	0.367	0.00113575	4	EXOSC8	RPCs
STON2	1.65e-50	0.545273	0.274	0.062	3.25e-46	4	STON2	RPCs
ZIC5	3.01e-88	0.544311	0.234	0.025	5.95e-84	4	ZIC5	RPCs
ENY2	2.01e-08	0.543631	0.711	0.781	0.000396957	4	ENY2	RPCs
URI1	7.38e-06	0.543095	0.486	0.479	0.145871	4	URI1	RPCs
PRMT1	1.44e-09	0.541986	0.677	0.727	2.84e-05	4	PRMT1	RPCs
KLHDC8B	6.77e-14	0.53883	0.337	0.188	1.34e-09	4	KLHDC8B	RPCs
CNOT10	1.01e-12	0.537593	0.32	0.189	1.99e-08	4	CNOT10	RPCs
HEY1	1.85e-07	0.537161	0.26	0.162	0.00365473	4	HEY1	RPCs
FMC1	3.66e-06	0.535812	0.46	0.407	0.0723185	4	FMC1	RPCs
FDFT1	8.31e-12	0.535781	0.449	0.325	1.64e-07	4	FDFT1	RPCs
MCM5	7.67e-22	0.534835	0.3	0.13	1.51e-17	4	MCM5	RPCs
FGFBP3	1.64e-40	0.533207	0.263	0.068	3.23e-36	4	FGFBP3	RPCs
MYCN	2.56e-31	0.532032	0.249	0.073	5.06e-27	4	MYCN	RPCs
LHX9	2.94e-86	0.53005	0.194	0.017	5.81e-82	4	LHX9	RPCs
SKA2	6.33e-05	0.527511	0.48	0.471	1	4	SKA2	RPCs
NRIP1	2.75e-10	0.527074	0.391	0.285	5.44e-06	4	NRIP1	RPCs
LINC01508	1.41e-140	0.52669	0.249	0.014	2.79e-136	4	LINC01508	RPCs
RRM1	4.82e-12	0.526436	0.354	0.223	9.52e-08	4	RRM1	RPCs
E2F1	7.87e-23	0.525555	0.214	0.072	1.55e-18	4	E2F1	RPCs
ZHX2	6.57e-35	0.525257	0.214	0.053	1.3e-30	4	ZHX2	RPCs
RPA2	2.48e-06	0.525076	0.394	0.317	0.0490403	4	RPA2	RPCs
NONO	7.45e-06	0.524996	0.617	0.681	0.147195	4	NONO	RPCs
MIDN	0.000589585	0.524526	0.391	0.355	1	4	MIDN	RPCs
SRSF10	0.000168402	0.522533	0.56	0.625	1	4	SRSF10	RPCs
ERH	1.59e-15	0.521689	0.791	0.868	3.15e-11	4	ERH	RPCs
RTN3	2.48e-07	0.521398	0.52	0.481	0.00489403	4	RTN3	RPCs
EZH2	1.25e-07	0.521133	0.337	0.239	0.00247875	4	EZH2	RPCs
COX17	0.000622746	0.520185	0.474	0.435	1	4	COX17	RPCs
ABAT	9.97e-36	0.519171	0.28	0.083	1.97e-31	4	ABAT	RPCs
RTN4	7.46e-11	0.516171	0.7	0.751	1.47e-06	4	RTN4	RPCs
LRRC75A	0.000511252	0.516106	0.509	0.496	1	4	LRRC75A	RPCs
CFAP298	2.32e-11	0.515966	0.391	0.267	4.58e-07	4	CFAP298	RPCs
SNRPE	3.05e-17	0.513419	0.817	0.881	6.03e-13	4	SNRPE	RPCs
MCM4	2.87e-18	0.51337	0.271	0.119	5.66e-14	4	MCM4	RPCs
SCCPDH	1.29e-08	0.513174	0.369	0.259	0.000254244	4	SCCPDH	RPCs
TRIM28	0.000747262	0.512373	0.52	0.546	1	4	TRIM28	RPCs
UNG	1.56e-13	0.511491	0.246	0.121	3.09e-09	4	UNG	RPCs
CAMK2N1	6.15e-10	0.510658	0.4	0.282	1.21e-05	4	CAMK2N1	RPCs
MRPL57	4.69e-05	0.510452	0.551	0.576	0.927476	4	MRPL57	RPCs
MKI67	3.18e-24	0.510183	0.263	0.093	6.29e-20	4	MKI67	RPCs
MYEF2	1.16e-10	0.508235	0.343	0.22	2.29e-06	4	MYEF2	RPCs
DTX4	7.88e-39	0.508128	0.226	0.053	1.56e-34	4	DTX4	RPCs
HNRNPH3	1.24e-05	0.50765	0.689	0.776	0.245188	4	HNRNPH3	RPCs
TKT	0.000174952	0.507597	0.517	0.541	1	4	TKT	RPCs
AC084033.3	6.38e-07	0.50754	0.334	0.245	0.0126043	4	AC084033.3	RPCs
LRP2	2.92e-118	0.506579	0.254	0.02	5.78e-114	4	LRP2	RPCs
TRPM3	1.37e-58	0.506482	0.337	0.08	2.71e-54	4	TRPM3	RPCs
KIF22	1.55e-16	0.504829	0.323	0.166	3.07e-12	4	KIF22	RPCs
VRK1	9.52e-14	0.504707	0.263	0.131	1.88e-09	4	VRK1	RPCs
MGME1	4.16e-12	0.504105	0.271	0.147	8.22e-08	4	MGME1	RPCs
PAICS	2.04e-05	0.502222	0.4	0.34	0.403564	4	PAICS	RPCs
DPYSL2	1.28e-11	0.502161	0.58	0.508	2.52e-07	4	DPYSL2	RPCs
PIMREG	5.48e-33	0.501826	0.237	0.065	1.08e-28	4	PIMREG	RPCs
TECR	1.68e-07	0.500867	0.46	0.413	0.00331697	4	TECR	RPCs
HES11	5.48e-88	1.90432	0.874	0.54	1.08e-83	5	HES1	NC
CTSC1	1.19e-76	1.79196	0.735	0.368	2.35e-72	5	CTSC	NC
IGFBP7	8.97e-130	1.75339	0.747	0.225	1.77e-125	5	IGFBP7	NC
CEBPD	3.57e-69	1.73031	0.726	0.35	7.05e-65	5	CEBPD	NC
KRT19	1.08e-08	1.46027	0.171	0.085	0.000213991	5	KRT19	NC
ID3	1.41e-64	1.40948	0.95	0.799	2.78e-60	5	ID3	NC
CTGF1	4.94e-26	1.35787	0.659	0.456	9.76e-22	5	CTGF	NC
FOXC11	2.4e-86	1.33693	0.879	0.491	4.74e-82	5	FOXC1	NC
PDGFRB	1.12e-55	1.28552	0.659	0.332	2.22e-51	5	PDGFRB	NC
GMDS1	7.61e-97	1.26033	0.703	0.265	1.5e-92	5	GMDS	NC
ZFP36L21	3.41e-54	1.2505	0.888	0.686	6.73e-50	5	ZFP36L2	NC
FOXF2	3.55e-169	1.23435	0.55	0.082	7.02e-165	5	FOXF2	NC
SHISA2	1.17e-56	1.21933	0.529	0.215	2.31e-52	5	SHISA2	NC
IFITM3	1.61e-57	1.19508	0.888	0.75	3.18e-53	5	IFITM3	NC
NR2F11	1.27e-50	1.18589	0.738	0.43	2.51e-46	5	NR2F1	NC
CYP26A1	1.21e-116	1.18023	0.329	0.039	2.4e-112	5	CYP26A1	NC
BAMBI	1.4e-63	1.15127	0.529	0.195	2.76e-59	5	BAMBI	NC
RAMP2	4.6e-39	1.09718	0.741	0.488	9.08e-35	5	RAMP2	NC
NR4A1	1.06e-42	1.09009	0.653	0.355	2.1e-38	5	NR4A1	NC
KRT18	1.12e-116	1.08753	0.391	0.056	2.22e-112	5	KRT18	NC
KRT8	1.68e-58	1.07474	0.409	0.118	3.32e-54	5	KRT8	NC
RARB	4.05e-106	1.06833	0.629	0.182	8.01e-102	5	RARB	NC
BGN	8.64e-38	1.06176	0.606	0.328	1.71e-33	5	BGN	NC
SOSTDC11	3.11e-40	1.04424	0.474	0.196	6.14e-36	5	SOSTDC1	NC
IER3	4.14e-21	1.03506	0.382	0.192	8.18e-17	5	IER3	NC
ID11	2.47e-33	1.01908	0.835	0.666	4.88e-29	5	ID1	NC
HES41	9.88e-53	1.00829	0.709	0.38	1.95e-48	5	HES4	NC
COL18A1	4.07e-67	0.996353	0.491	0.158	8.04e-63	5	COL18A1	NC
FOXC21	2.48e-75	0.967595	0.606	0.204	4.9e-71	5	FOXC2	NC
JUNB1	2.81e-28	0.930911	0.812	0.612	5.56e-24	5	JUNB	NC
SELENOP1	1.8e-57	0.916992	0.521	0.185	3.55e-53	5	SELENOP	NC
ITIH5	1.58e-95	0.914961	0.244	0.025	3.13e-91	5	ITIH5	NC
RSPO3	6.31e-59	0.905493	0.341	0.081	1.25e-54	5	RSPO3	NC
ZFP361	1.23e-26	0.892649	0.671	0.419	2.44e-22	5	ZFP36	NC
PCP4	1.14e-34	0.882141	0.335	0.114	2.26e-30	5	PCP4	NC
FRZB	2.66e-74	0.875318	0.574	0.189	5.25e-70	5	FRZB	NC
IER2	1.97e-28	0.862281	0.841	0.664	3.89e-24	5	IER2	NC
EDN3	1.12e-52	0.862068	0.5	0.192	2.21e-48	5	EDN3	NC
PCDH18	4.12e-32	0.844649	0.741	0.543	8.14e-28	5	PCDH18	NC
CYTL1	1.13e-41	0.828578	0.435	0.164	2.23e-37	5	CYTL1	NC
TMSB4X	1.86e-52	0.814522	0.994	0.986	3.69e-48	5	TMSB4X	NC
CAST	5.29e-35	0.807817	0.629	0.384	1.05e-30	5	CAST	NC
GPM6B	3.8e-25	0.748173	0.615	0.428	7.5e-21	5	GPM6B	NC
GADD45B	1.21e-32	0.74634	0.588	0.299	2.4e-28	5	GADD45B	NC
PCOLCE1	4.73e-39	0.742732	0.85	0.611	9.35e-35	5	PCOLCE	NC
EPB41L2	5.42e-34	0.731695	0.759	0.531	1.07e-29	5	EPB41L2	NC
CALD1	1.34e-39	0.726966	0.912	0.816	2.65e-35	5	CALD1	NC
DUSP1	4.64e-18	0.721599	0.647	0.494	9.17e-14	5	DUSP1	NC
S100A112	3.06e-36	0.707912	0.941	0.79	6.05e-32	5	S100A11	NC
SLC9A3R2	1.15e-33	0.705958	0.641	0.38	2.26e-29	5	SLC9A3R2	NC
MIR99AHG	3.93e-27	0.697656	0.694	0.489	7.77e-23	5	MIR99AHG	NC
SULT1E12	1.96e-08	0.696119	0.462	0.331	0.00038677	5	SULT1E1	NC
IFITM2	6.88e-47	0.694815	0.544	0.243	1.36e-42	5	IFITM2	NC
JUND	5.84e-39	0.689541	0.979	0.942	1.15e-34	5	JUND	NC
RBP11	1.81e-36	0.686556	0.874	0.788	3.58e-32	5	RBP1	NC
THY1	2.8e-19	0.658967	0.512	0.31	5.53e-15	5	THY1	NC
ANXA21	2.5e-26	0.654751	0.903	0.739	4.95e-22	5	ANXA2	NC
TUSC3	1.01e-27	0.653184	0.741	0.567	1.99e-23	5	TUSC3	NC
CD248	2.12e-33	0.649636	0.594	0.34	4.2e-29	5	CD248	NC
ARHGAP29	1.32e-19	0.648513	0.488	0.306	2.61e-15	5	ARHGAP29	NC
NR3C1	6.3e-29	0.646233	0.606	0.356	1.24e-24	5	NR3C1	NC
TFPI	7.6e-31	0.645919	0.297	0.099	1.5e-26	5	TFPI	NC
BTG2	1.31e-16	0.643493	0.585	0.412	2.59e-12	5	BTG2	NC
NR2F22	1.45e-20	0.632883	0.703	0.524	2.86e-16	5	NR2F2	NC
GUCY1A1	7.53e-44	0.631587	0.385	0.129	1.49e-39	5	GUCY1A1	NC
A2M	1.15e-34	0.625701	0.179	0.037	2.27e-30	5	A2M	NC
FLRT31	1.5e-17	0.624423	0.544	0.364	2.96e-13	5	FLRT3	NC
VMP1	1.27e-11	0.622594	0.585	0.453	2.51e-07	5	VMP1	NC
PLEKHH2	1e-31	0.622444	0.512	0.26	1.98e-27	5	PLEKHH2	NC
NDNF1	1.91e-31	0.618501	0.474	0.218	3.78e-27	5	NDNF	NC
MYLIP	2.49e-19	0.617696	0.338	0.172	4.91e-15	5	MYLIP	NC
PITX21	1.42e-30	0.608338	0.712	0.424	2.82e-26	5	PITX2	NC
DHRS3	3.67e-23	0.607345	0.471	0.252	7.25e-19	5	DHRS3	NC
CLU1	2.59e-13	0.604703	0.585	0.442	5.12e-09	5	CLU	NC
ATF3	8.55e-18	0.598224	0.426	0.243	1.69e-13	5	ATF3	NC
RASL11A	1.81e-146	0.585035	0.282	0.019	3.58e-142	5	RASL11A	NC
PITX11	5.31e-20	0.583551	0.582	0.357	1.05e-15	5	PITX1	NC
JAG1	4.86e-45	0.581171	0.468	0.173	9.61e-41	5	JAG1	NC
SLC2A3	6.96e-20	0.580569	0.335	0.158	1.37e-15	5	SLC2A3	NC
TPM1	6.06e-32	0.579838	0.888	0.704	1.2e-27	5	TPM1	NC
CYR611	1.79e-12	0.572475	0.629	0.465	3.53e-08	5	CYR61	NC
PTCH1	2.47e-36	0.572027	0.362	0.132	4.87e-32	5	PTCH1	NC
CYP1B11	3.54e-14	0.563726	0.606	0.429	6.99e-10	5	CYP1B1	NC
NCOA7	1.91e-32	0.558311	0.459	0.214	3.78e-28	5	NCOA7	NC
EVA1B	6.91e-20	0.557481	0.697	0.539	1.37e-15	5	EVA1B	NC
TCIM	1.43e-12	0.556806	0.124	0.042	2.83e-08	5	TCIM	NC
SLC26A7	2.5e-59	0.556115	0.25	0.044	4.95e-55	5	SLC26A7	NC
EMCN	2.8e-32	0.550081	0.385	0.148	5.54e-28	5	EMCN	NC
DSTN	4.43e-26	0.54927	0.926	0.852	8.75e-22	5	DSTN	NC
B2M	5.29e-29	0.543912	0.894	0.734	1.04e-24	5	B2M	NC
JUN	1.47e-11	0.53667	0.874	0.781	2.9e-07	5	JUN	NC
TGM2	1.3e-73	0.533852	0.259	0.038	2.57e-69	5	TGM2	NC
FOS1	5.46e-18	0.532527	0.921	0.794	1.08e-13	5	FOS	NC
CLDN11	3.41e-52	0.530106	0.282	0.061	6.74e-48	5	CLDN11	NC
HIC1	8.46e-20	0.528412	0.471	0.265	1.67e-15	5	HIC1	NC
EGR11	1.1e-15	0.52514	0.832	0.721	2.17e-11	5	EGR1	NC
SDC21	2.91e-22	0.52431	0.615	0.404	5.76e-18	5	SDC2	NC
COL4A1	1.05e-17	0.522125	0.512	0.317	2.08e-13	5	COL4A1	NC
NID1	5.3e-30	0.515674	0.538	0.285	1.05e-25	5	NID1	NC
IRF2BP2	1.87e-17	0.513143	0.603	0.439	3.69e-13	5	IRF2BP2	NC
DPYSL3	7.82e-09	0.512018	0.471	0.354	0.00015444	5	DPYSL3	NC
TSC22D11	1.76e-19	0.511321	0.85	0.685	3.48e-15	5	TSC22D1	NC
CCL2	2.78e-06	0.509098	0.221	0.132	0.0548378	5	CCL2	NC
CEBPB	1.22e-11	0.503794	0.365	0.228	2.41e-07	5	CEBPB	NC
GNG11	4.85e-20	0.501679	0.503	0.292	9.58e-16	5	GNG11	NC
SNAI2	2.98e-18	0.501004	0.447	0.259	5.9e-14	5	SNAI2	NC
OGN1	2.65e-128	1.98892	0.993	0.537	5.23e-124	6	OGN	periocular mesenchyme
ASPN1	8.91e-174	1.94425	0.853	0.183	1.76e-169	6	ASPN	periocular mesenchyme
PENK1	2.95e-115	1.71421	0.587	0.115	5.82e-111	6	PENK	periocular mesenchyme
NRP21	4.89e-151	1.60318	0.99	0.375	9.67e-147	6	NRP2	periocular mesenchyme
COL1A12	9.92e-111	1.55019	1	0.857	1.96e-106	6	COL1A1	periocular mesenchyme
COL1A22	2.77e-117	1.4739	1	0.894	5.48e-113	6	COL1A2	periocular mesenchyme
TSC22D12	1.89e-105	1.47029	0.997	0.678	3.74e-101	6	TSC22D1	periocular mesenchyme
COL12A11	1.1e-116	1.46416	0.993	0.524	2.18e-112	6	COL12A1	periocular mesenchyme
TM4SF11	7.4e-193	1.42331	0.913	0.19	1.46e-188	6	TM4SF1	periocular mesenchyme
CYR612	1.31e-76	1.40853	0.892	0.452	2.6e-72	6	CYR61	periocular mesenchyme
LMO41	3.36e-103	1.37465	0.983	0.659	6.65e-99	6	LMO4	periocular mesenchyme
LTBP11	5.76e-133	1.34876	0.962	0.374	1.14e-128	6	LTBP1	periocular mesenchyme
GADD45B1	1.37e-84	1.34236	0.801	0.29	2.71e-80	6	GADD45B	periocular mesenchyme
PCOLCE2	1.66e-95	1.32609	0.99	0.606	3.27e-91	6	PCOLCE	periocular mesenchyme
FOXC12	1.11e-104	1.21865	0.993	0.489	2.19e-100	6	FOXC1	periocular mesenchyme
GJA11	1.77e-108	1.19657	0.937	0.389	3.5e-104	6	GJA1	periocular mesenchyme
SPARC2	1.05e-98	1.18958	1	0.854	2.07e-94	6	SPARC	periocular mesenchyme
RERG1	1.86e-177	1.16906	0.888	0.193	3.67e-173	6	RERG	periocular mesenchyme
COL8A21	4.78e-146	1.1614	0.902	0.247	9.45e-142	6	COL8A2	periocular mesenchyme
COL11A11	3.89e-135	1.1525	0.934	0.298	7.68e-131	6	COL11A1	periocular mesenchyme
ID12	3.93e-46	1.1391	0.944	0.662	7.77e-42	6	ID1	periocular mesenchyme
COL9A31	3.72e-125	1.12917	0.804	0.212	7.36e-121	6	COL9A3	periocular mesenchyme
CTHRC12	9.68e-77	1.10987	0.955	0.472	1.91e-72	6	CTHRC1	periocular mesenchyme
CTGF2	9.66e-76	1.08694	0.92	0.443	1.91e-71	6	CTGF	periocular mesenchyme
CYTL11	5.34e-94	1.08208	0.626	0.156	1.06e-89	6	CYTL1	periocular mesenchyme
DYNC1I11	4.58e-177	1.08164	0.787	0.145	9.05e-173	6	DYNC1I1	periocular mesenchyme
COL3A12	1.84e-54	1.07136	0.997	0.848	3.63e-50	6	COL3A1	periocular mesenchyme
GEM	3.92e-142	1.04648	0.724	0.146	7.75e-138	6	GEM	periocular mesenchyme
PITX22	1.91e-88	1.01316	0.962	0.413	3.77e-84	6	PITX2	periocular mesenchyme
MGP2	6.39e-65	0.996712	0.986	0.57	1.26e-60	6	MGP	periocular mesenchyme
FABP51	1.9e-62	0.98631	0.983	0.779	3.75e-58	6	FABP5	periocular mesenchyme
FOXP11	1.61e-76	0.980226	0.983	0.649	3.19e-72	6	FOXP1	periocular mesenchyme
GPC3	7.01e-60	0.979656	0.92	0.464	1.38e-55	6	GPC3	periocular mesenchyme
TPBG1	6.4e-80	0.972824	0.92	0.45	1.26e-75	6	TPBG	periocular mesenchyme
TSPO1	8.73e-80	0.972259	0.832	0.341	1.72e-75	6	TSPO	periocular mesenchyme
AC020916.1	9.28e-74	0.971631	0.668	0.22	1.83e-69	6	AC020916.1	periocular mesenchyme
SGCD1	3.53e-118	0.964796	0.794	0.222	6.97e-114	6	SGCD	periocular mesenchyme
KCNQ1OT11	1.78e-55	0.959607	0.997	0.8	3.51e-51	6	KCNQ1OT1	periocular mesenchyme
SOSTDC12	1.56e-112	0.909623	0.745	0.184	3.09e-108	6	SOSTDC1	periocular mesenchyme
FBLN5	1.75e-78	0.906554	0.864	0.364	3.45e-74	6	FBLN5	periocular mesenchyme
BOC1	1.07e-87	0.905114	0.86	0.322	2.11e-83	6	BOC	periocular mesenchyme
PRSS351	1.06e-66	0.904583	0.86	0.358	2.09e-62	6	PRSS35	periocular mesenchyme
SDC22	5.58e-85	0.889202	0.892	0.391	1.1e-80	6	SDC2	periocular mesenchyme
CDC42EP51	2.91e-75	0.88569	0.983	0.639	5.75e-71	6	CDC42EP5	periocular mesenchyme
SIX21	4.38e-92	0.853478	0.717	0.207	8.65e-88	6	SIX2	periocular mesenchyme
ELN	8.48e-65	0.845841	0.892	0.422	1.68e-60	6	ELN	periocular mesenchyme
FOXC22	4.64e-113	0.828373	0.783	0.199	9.17e-109	6	FOXC2	periocular mesenchyme
DKK21	1.86e-74	0.821499	0.727	0.237	3.68e-70	6	DKK2	periocular mesenchyme
C2orf402	3.18e-61	0.814483	0.832	0.369	6.29e-57	6	C2orf40	periocular mesenchyme
FIBIN1	1.83e-76	0.787243	0.78	0.259	3.61e-72	6	FIBIN	periocular mesenchyme
MMP22	9.19e-59	0.77119	0.923	0.507	1.82e-54	6	MMP2	periocular mesenchyme
FLRT32	2.17e-51	0.768375	0.776	0.353	4.29e-47	6	FLRT3	periocular mesenchyme
MFAP21	4.33e-50	0.768152	0.958	0.67	8.56e-46	6	MFAP2	periocular mesenchyme
THBS2	5.99e-109	0.762788	0.657	0.144	1.18e-104	6	THBS2	periocular mesenchyme
IGF11	3.62e-65	0.750106	0.584	0.17	7.15e-61	6	IGF1	periocular mesenchyme
CREB3L11	9.22e-103	0.748891	0.769	0.212	1.82e-98	6	CREB3L1	periocular mesenchyme
CPED11	2.12e-67	0.74886	0.906	0.409	4.18e-63	6	CPED1	periocular mesenchyme
CDH111	2.19e-60	0.747395	0.958	0.589	4.33e-56	6	CDH11	periocular mesenchyme
CNN31	2.35e-54	0.74143	1	0.808	4.64e-50	6	CNN3	periocular mesenchyme
PPP3CA1	7.08e-52	0.732994	0.818	0.435	1.4e-47	6	PPP3CA	periocular mesenchyme
OLFML31	2.78e-56	0.730011	0.927	0.493	5.49e-52	6	OLFML3	periocular mesenchyme
LGALS12	1.35e-55	0.726963	1	0.935	2.66e-51	6	LGALS1	periocular mesenchyme
CALU1	1.12e-56	0.725438	0.986	0.733	2.22e-52	6	CALU	periocular mesenchyme
EPB41L21	1.92e-51	0.723003	0.902	0.525	3.8e-47	6	EPB41L2	periocular mesenchyme
RRBP11	1.59e-51	0.721868	0.958	0.619	3.13e-47	6	RRBP1	periocular mesenchyme
IL11RA1	2.47e-53	0.719428	0.976	0.59	4.88e-49	6	IL11RA	periocular mesenchyme
SPATS2L1	1.21e-48	0.713602	0.934	0.622	2.39e-44	6	SPATS2L	periocular mesenchyme
COL5A22	2.76e-47	0.710263	0.962	0.641	5.45e-43	6	COL5A2	periocular mesenchyme
MFAP4	4.86e-47	0.698	0.958	0.616	9.6e-43	6	MFAP4	periocular mesenchyme
ETV1	6.81e-72	0.69587	0.706	0.235	1.35e-67	6	ETV1	periocular mesenchyme
CTSK1	4.82e-55	0.695766	0.888	0.454	9.53e-51	6	CTSK	periocular mesenchyme
FKBP14	5.48e-71	0.694587	0.787	0.301	1.08e-66	6	FKBP14	periocular mesenchyme
S100A113	4.37e-43	0.685502	0.997	0.789	8.64e-39	6	S100A11	periocular mesenchyme
LMNA	2.84e-48	0.683472	0.874	0.5	5.62e-44	6	LMNA	periocular mesenchyme
ANTXR1	2.26e-52	0.674221	0.783	0.378	4.46e-48	6	ANTXR1	periocular mesenchyme
LUM2	4.21e-40	0.672653	0.965	0.661	8.33e-36	6	LUM	periocular mesenchyme
ZNF521	4.2e-64	0.669246	0.783	0.338	8.3e-60	6	ZNF521	periocular mesenchyme
FAT11	2.63e-52	0.666667	0.825	0.407	5.19e-48	6	FAT1	periocular mesenchyme
C1QTNF2	3.27e-81	0.666459	0.661	0.182	6.46e-77	6	C1QTNF2	periocular mesenchyme
ANXA22	8.69e-46	0.663183	0.993	0.736	1.72e-41	6	ANXA2	periocular mesenchyme
APP1	1.25e-40	0.659636	0.937	0.646	2.46e-36	6	APP	periocular mesenchyme
DDIT4L1	5.34e-153	0.653228	0.58	0.078	1.06e-148	6	DDIT4L	periocular mesenchyme
PITX12	2.18e-58	0.647404	0.846	0.344	4.31e-54	6	PITX1	periocular mesenchyme
SERTAD4	2.36e-132	0.639597	0.636	0.112	4.67e-128	6	SERTAD4	periocular mesenchyme
FGFR1	1.96e-44	0.639135	0.871	0.512	3.87e-40	6	FGFR1	periocular mesenchyme
KLF2	1.46e-45	0.63543	0.724	0.302	2.88e-41	6	KLF2	periocular mesenchyme
CKAP4	5.57e-47	0.629687	0.874	0.533	1.1e-42	6	CKAP4	periocular mesenchyme
RCN3	7e-69	0.627646	0.713	0.237	1.38e-64	6	RCN3	periocular mesenchyme
ANXA5	1.2e-43	0.62732	0.986	0.791	2.37e-39	6	ANXA5	periocular mesenchyme
GPX81	1.33e-45	0.62382	0.885	0.511	2.64e-41	6	GPX8	periocular mesenchyme
CRABP22	4.15e-39	0.623774	0.976	0.667	8.19e-35	6	CRABP2	periocular mesenchyme
RFLNA1	3.1e-92	0.620134	0.675	0.17	6.13e-88	6	RFLNA	periocular mesenchyme
EMP31	4.2e-40	0.619482	0.972	0.717	8.31e-36	6	EMP3	periocular mesenchyme
TIMP11	2.17e-44	0.619026	0.958	0.686	4.28e-40	6	TIMP1	periocular mesenchyme
APOE	3e-57	0.616845	0.811	0.344	5.93e-53	6	APOE	periocular mesenchyme
EGFL61	3.88e-39	0.610604	0.829	0.41	7.66e-35	6	EGFL6	periocular mesenchyme
BGN1	1.25e-62	0.607654	0.804	0.32	2.47e-58	6	BGN	periocular mesenchyme
STC1	5.86e-79	0.6051	0.423	0.08	1.16e-74	6	STC1	periocular mesenchyme
CRTAP	2.13e-51	0.599208	0.86	0.443	4.21e-47	6	CRTAP	periocular mesenchyme
PRRX21	1.4e-51	0.598542	0.818	0.359	2.77e-47	6	PRRX2	periocular mesenchyme
NUDT4	2.45e-47	0.596629	0.871	0.47	4.84e-43	6	NUDT4	periocular mesenchyme
IER21	1.22e-28	0.596019	0.916	0.662	2.42e-24	6	IER2	periocular mesenchyme
FAT4	6.31e-64	0.593835	0.738	0.27	1.25e-59	6	FAT4	periocular mesenchyme
FOXD2	1.38e-120	0.58939	0.643	0.121	2.73e-116	6	FOXD2	periocular mesenchyme
CD47	3.62e-48	0.58445	0.766	0.349	7.15e-44	6	CD47	periocular mesenchyme
FOXP4	7.32e-89	0.577772	0.654	0.173	1.45e-84	6	FOXP4	periocular mesenchyme
NDNF2	6.95e-73	0.57395	0.699	0.208	1.37e-68	6	NDNF	periocular mesenchyme
CCND2	7.02e-39	0.57201	0.937	0.665	1.39e-34	6	CCND2	periocular mesenchyme
NUAK1	6.63e-84	0.566104	0.545	0.126	1.31e-79	6	NUAK1	periocular mesenchyme
FABP4	7.42e-108	0.560914	0.283	0.025	1.47e-103	6	FABP4	periocular mesenchyme
SESN3	2.4e-42	0.560693	0.888	0.517	4.74e-38	6	SESN3	periocular mesenchyme
FGFR2	3.67e-76	0.557516	0.668	0.19	7.24e-72	6	FGFR2	periocular mesenchyme
TMEM119	2.91e-51	0.557176	0.703	0.275	5.74e-47	6	TMEM119	periocular mesenchyme
RBMS3	1.73e-46	0.553817	0.79	0.39	3.42e-42	6	RBMS3	periocular mesenchyme
PI15	4.81e-80	0.55342	0.367	0.06	9.5e-76	6	PI15	periocular mesenchyme
PEG3	3.61e-37	0.551574	0.836	0.48	7.14e-33	6	PEG3	periocular mesenchyme
EFNA51	1.02e-42	0.549596	0.867	0.464	2.02e-38	6	EFNA5	periocular mesenchyme
TIMP3	3.42e-49	0.548515	0.829	0.388	6.75e-45	6	TIMP3	periocular mesenchyme
CYP1B12	3.81e-22	0.546966	0.727	0.424	7.54e-18	6	CYP1B1	periocular mesenchyme
CALD11	1.31e-31	0.546048	0.99	0.812	2.6e-27	6	CALD1	periocular mesenchyme
REV3L	9.56e-46	0.544512	0.762	0.355	1.89e-41	6	REV3L	periocular mesenchyme
CD811	5.78e-40	0.543369	0.997	0.869	1.14e-35	6	CD81	periocular mesenchyme
AIG1	8.73e-49	0.542814	0.724	0.317	1.72e-44	6	AIG1	periocular mesenchyme
NREP	2.86e-33	0.541898	0.997	0.83	5.65e-29	6	NREP	periocular mesenchyme
NUCB2	8.06e-41	0.539559	0.85	0.457	1.59e-36	6	NUCB2	periocular mesenchyme
ALCAM1	1.65e-38	0.538195	0.794	0.371	3.27e-34	6	ALCAM	periocular mesenchyme
KRT10	6.04e-35	0.537885	0.972	0.827	1.19e-30	6	KRT10	periocular mesenchyme
BNC2	3.01e-56	0.536368	0.703	0.252	5.95e-52	6	BNC2	periocular mesenchyme
SEC31A	3.56e-41	0.535936	0.909	0.585	7.04e-37	6	SEC31A	periocular mesenchyme
IGFBP52	3.55e-38	0.534842	0.976	0.67	7.01e-34	6	IGFBP5	periocular mesenchyme
ACAN	2.53e-165	0.534168	0.455	0.043	4.99e-161	6	ACAN	periocular mesenchyme
CADPS2	1.78e-151	0.533602	0.528	0.066	3.51e-147	6	CADPS2	periocular mesenchyme
PALLD	1.33e-34	0.532458	0.853	0.503	2.62e-30	6	PALLD	periocular mesenchyme
AKAP121	3.24e-29	0.529388	0.909	0.612	6.41e-25	6	AKAP12	periocular mesenchyme
LIMA1	3.18e-36	0.522259	0.892	0.509	6.29e-32	6	LIMA1	periocular mesenchyme
SCX1	5.55e-53	0.520348	0.521	0.154	1.1e-48	6	SCX	periocular mesenchyme
PLD3	3.65e-40	0.519997	0.965	0.695	7.21e-36	6	PLD3	periocular mesenchyme
CNN2	1.41e-37	0.51725	0.815	0.439	2.79e-33	6	CNN2	periocular mesenchyme
COL2A11	9.27e-63	0.51509	0.612	0.185	1.83e-58	6	COL2A1	periocular mesenchyme
PIEZO21	1.8e-50	0.508774	0.664	0.245	3.55e-46	6	PIEZO2	periocular mesenchyme
TENT5A	6.59e-55	0.508326	0.636	0.213	1.3e-50	6	TENT5A	periocular mesenchyme
GLT8D21	4.52e-44	0.50564	0.843	0.385	8.94e-40	6	GLT8D2	periocular mesenchyme
GAS21	1.4e-35	0.501281	0.703	0.304	2.77e-31	6	GAS2	periocular mesenchyme
PCLAF1	2.45e-98	1.74273	0.715	0.233	4.84e-94	7	PCLAF	proliferating cells
TYMS1	3.19e-77	1.40927	0.605	0.189	6.3e-73	7	TYMS	proliferating cells
DUT1	1.65e-35	1.36468	0.74	0.631	3.26e-31	7	DUT	proliferating cells
TUBA1B1	5.76e-62	1.25341	0.936	0.92	1.14e-57	7	TUBA1B	proliferating cells
PCNA1	2.19e-43	1.15636	0.58	0.279	4.32e-39	7	PCNA	proliferating cells
H2AFZ1	6.8e-45	1.05942	0.875	0.829	1.34e-40	7	H2AFZ	proliferating cells
HIST1H4C1	3.53e-17	0.915146	0.722	0.627	6.97e-13	7	HIST1H4C	proliferating cells
CENPK	4.57e-64	0.893362	0.47	0.125	9.03e-60	7	CENPK	proliferating cells
MAD2L11	2.35e-56	0.883529	0.534	0.167	4.65e-52	7	MAD2L1	proliferating cells
HMGB11	1.48e-47	0.870406	0.961	0.966	2.93e-43	7	HMGB1	proliferating cells
HMGB21	7.53e-31	0.865847	0.794	0.635	1.49e-26	7	HMGB2	proliferating cells
HMGN21	4.18e-35	0.852478	0.893	0.917	8.27e-31	7	HMGN2	proliferating cells
GINS21	3.73e-60	0.850633	0.512	0.158	7.38e-56	7	GINS2	proliferating cells
RRM2	1.15e-41	0.836643	0.327	0.088	2.27e-37	7	RRM2	proliferating cells
CENPW	1.84e-43	0.826185	0.534	0.211	3.64e-39	7	CENPW	proliferating cells
TOP2A1	3.6e-60	0.817183	0.598	0.195	7.12e-56	7	TOP2A	proliferating cells
NASP1	4.93e-20	0.792232	0.754	0.713	9.75e-16	7	NASP	proliferating cells
TK11	6.36e-73	0.786448	0.402	0.083	1.26e-68	7	TK1	proliferating cells
MCM71	3.68e-35	0.779244	0.491	0.207	7.27e-31	7	MCM7	proliferating cells
RANBP11	1.72e-23	0.777728	0.786	0.735	3.39e-19	7	RANBP1	proliferating cells
ZWINT1	6.69e-73	0.771689	0.466	0.107	1.32e-68	7	ZWINT	proliferating cells
CKS1B1	9.51e-27	0.759853	0.68	0.434	1.88e-22	7	CKS1B	proliferating cells
TMSB15A1	9.78e-24	0.739277	0.719	0.527	1.93e-19	7	TMSB15A	proliferating cells
DEK1	5.58e-18	0.733098	0.733	0.697	1.1e-13	7	DEK	proliferating cells
CDK11	1.77e-35	0.723098	0.416	0.143	3.51e-31	7	CDK1	proliferating cells
NUSAP11	1.76e-40	0.701882	0.445	0.143	3.48e-36	7	NUSAP1	proliferating cells
CENPX	1.16e-11	0.676165	0.577	0.48	2.28e-07	7	CENPX	proliferating cells
CLSPN	1.33e-59	0.667897	0.356	0.077	2.63e-55	7	CLSPN	proliferating cells
SMC2	2.6e-26	0.656777	0.505	0.256	5.14e-22	7	SMC2	proliferating cells
SNRPB1	7.6e-22	0.642917	0.754	0.648	1.5e-17	7	SNRPB	proliferating cells
HELLS1	9.71e-25	0.634729	0.509	0.278	1.92e-20	7	HELLS	proliferating cells
RPA31	8.12e-21	0.634071	0.562	0.344	1.61e-16	7	RPA3	proliferating cells
LSM41	1.61e-16	0.632654	0.683	0.56	3.18e-12	7	LSM4	proliferating cells
PTTG11	2.25e-20	0.627063	0.47	0.24	4.44e-16	7	PTTG1	proliferating cells
ATAD2	9.74e-33	0.619709	0.384	0.142	1.92e-28	7	ATAD2	proliferating cells
CENPU1	7.06e-37	0.617277	0.381	0.125	1.39e-32	7	CENPU	proliferating cells
ACTA2	0.00457995	0.614679	0.1	0.059	1	7	ACTA2	proliferating cells
NUDT1	1.41e-25	0.612955	0.52	0.279	2.79e-21	7	NUDT1	proliferating cells
IGFBP71	3.34e-05	0.611627	0.342	0.253	0.660645	7	IGFBP7	proliferating cells
RRM11	3.55e-24	0.605858	0.456	0.219	7.01e-20	7	RRM1	proliferating cells
GMNN1	1.96e-24	0.586598	0.416	0.19	3.86e-20	7	GMNN	proliferating cells
TMPO1	6.57e-12	0.58548	0.623	0.499	1.3e-07	7	TMPO	proliferating cells
UBE2T1	3.03e-28	0.577311	0.409	0.163	5.99e-24	7	UBE2T	proliferating cells
DHFR1	2.38e-26	0.575704	0.313	0.11	4.71e-22	7	DHFR	proliferating cells
CHEK11	3.15e-37	0.5665	0.367	0.116	6.22e-33	7	CHEK1	proliferating cells
MCM51	5.13e-33	0.564196	0.374	0.129	1.01e-28	7	MCM5	proliferating cells
RFC4	1.42e-19	0.562535	0.374	0.178	2.81e-15	7	RFC4	proliferating cells
COMMD4	1.43e-13	0.562106	0.505	0.339	2.82e-09	7	COMMD4	proliferating cells
SLC25A5	5.92e-09	0.561199	0.715	0.681	0.000116967	7	SLC25A5	proliferating cells
SLBP	2.84e-13	0.554035	0.423	0.258	5.61e-09	7	SLBP	proliferating cells
UBE2C1	6.92e-42	0.544975	0.473	0.157	1.37e-37	7	UBE2C	proliferating cells
CENPH1	1.28e-36	0.543348	0.409	0.142	2.54e-32	7	CENPH	proliferating cells
GNG111	0.00577129	0.542231	0.363	0.302	1	7	GNG11	proliferating cells
ORC6	1.77e-35	0.540224	0.342	0.107	3.51e-31	7	ORC6	proliferating cells
ALDH1A11	0.000300494	0.534684	0.135	0.078	1	7	ALDH1A1	proliferating cells
MCM31	2.51e-23	0.531491	0.423	0.2	4.96e-19	7	MCM3	proliferating cells
CENPF1	9.55e-37	0.528039	0.488	0.179	1.89e-32	7	CENPF	proliferating cells
RFC3	7.8e-27	0.527062	0.374	0.149	1.54e-22	7	RFC3	proliferating cells
SMC41	4.83e-19	0.522722	0.441	0.22	9.54e-15	7	SMC4	proliferating cells
MCM10	4.56e-50	0.518908	0.263	0.05	9.02e-46	7	MCM10	proliferating cells
UHRF11	7.09e-51	0.515097	0.363	0.09	1.4e-46	7	UHRF1	proliferating cells
TMEM106C	2.57e-12	0.508542	0.48	0.319	5.08e-08	7	TMEM106C	proliferating cells
H2AFV1	2.37e-11	0.507355	0.69	0.621	4.69e-07	7	H2AFV	proliferating cells
SIVA1	7.22e-09	0.505925	0.715	0.714	0.000142611	7	SIVA1	proliferating cells
HIST1H1D1	1.42e-11	0.505522	0.374	0.218	2.81e-07	7	HIST1H1D	proliferating cells
C19orf48	1.29e-13	0.503761	0.502	0.33	2.55e-09	7	C19orf48	proliferating cells
TUBB	1.8e-24	0.502278	0.954	0.964	3.56e-20	7	TUBB	proliferating cells
HIST1H1A	7.15e-18	0.500488	0.235	0.085	1.41e-13	7	HIST1H1A	proliferating cells
STMN2	9.3e-225	4.27688	0.996	0.276	1.84e-220	8	STMN2	RGCs
GAP43	1.76e-181	3.46196	0.953	0.313	3.48e-177	8	GAP43	RGCs
PRPH	0	3.34254	0.836	0.082	0	8	PRPH	RGCs
ELAVL4	0	3.32588	0.961	0.066	0	8	ELAVL4	RGCs
MAP1B	2.69e-164	3.25181	1	0.578	5.32e-160	8	MAP1B	RGCs
TUBB2B1	1.99e-155	3.21716	1	0.676	3.94e-151	8	TUBB2B	RGCs
TUBA1A	4.28e-143	3.10633	1	0.949	8.46e-139	8	TUBA1A	RGCs
CRABP11	2.79e-132	3.07226	0.984	0.677	5.52e-128	8	CRABP1	RGCs
SNCG	0	3.06343	0.957	0.118	0	8	SNCG	RGCs
RTN1	0	2.89686	0.891	0.079	0	8	RTN1	RGCs
NSG1	3.74e-235	2.6997	0.871	0.153	7.38e-231	8	NSG1	RGCs
PCSK1N	2.34e-272	2.63942	0.898	0.134	4.62e-268	8	PCSK1N	RGCs
ISL1	0	2.61477	0.891	0.033	0	8	ISL1	RGCs
CRMP1	0	2.60017	0.973	0.105	0	8	CRMP1	RGCs
SIX31	0	2.5894	0.941	0.116	0	8	SIX3	RGCs
INA	0	2.58029	0.938	0.051	0	8	INA	RGCs
TUBB2A	7.43e-137	2.57556	0.91	0.379	1.47e-132	8	TUBB2A	RGCs
TAGLN3	0	2.54375	0.965	0.091	0	8	TAGLN3	RGCs
SYT4	0	2.52536	0.918	0.048	0	8	SYT4	RGCs
CNTN2	0	2.50047	0.723	0.039	0	8	CNTN2	RGCs
PAX61	2.3e-254	2.48497	0.957	0.168	4.55e-250	8	PAX6	RGCs
ATOH71	1.29e-222	2.46718	0.559	0.046	2.55e-218	8	ATOH7	RGCs
MIAT1	0	2.44787	0.926	0.077	0	8	MIAT	RGCs
MLLT11	2.13e-167	2.42951	0.996	0.481	4.21e-163	8	MLLT11	RGCs
UCHL1	6.82e-160	2.41327	0.984	0.427	1.35e-155	8	UCHL1	RGCs
NEFM	0	2.38232	0.848	0.049	0	8	NEFM	RGCs
CALM21	3.97e-132	2.31405	1	0.942	7.84e-128	8	CALM2	RGCs
NEFL	0	2.26244	0.82	0.054	0	8	NEFL	RGCs
SOX111	4.59e-142	2.21675	0.992	0.51	9.07e-138	8	SOX11	RGCs
SYT12	0	2.20369	0.973	0.119	0	8	SYT1	RGCs
DCX	0	2.20338	0.918	0.076	0	8	DCX	RGCs
C4orf48	1.44e-130	2.12537	0.973	0.576	2.84e-126	8	C4orf48	RGCs
HMGCS1	1.58e-140	2.10033	0.91	0.317	3.12e-136	8	HMGCS1	RGCs
STMN4	0	2.04471	0.844	0.05	0	8	STMN4	RGCs
BEX11	1.69e-196	2.03891	0.992	0.284	3.33e-192	8	BEX1	RGCs
ELAVL3	0	2.01887	0.949	0.034	0	8	ELAVL3	RGCs
DPYSL21	7.44e-153	2.00773	0.984	0.49	1.47e-148	8	DPYSL2	RGCs
CD24	6.34e-149	2.00677	0.988	0.493	1.25e-144	8	CD24	RGCs
OLFM1	0	2.00558	0.82	0.046	0	8	OLFM1	RGCs
POU6F2	0	1.94866	0.797	0.029	0	8	POU6F2	RGCs
RTN41	7.53e-140	1.89655	1	0.736	1.49e-135	8	RTN4	RGCs
SNCA	5.89e-121	1.89568	0.766	0.213	1.16e-116	8	SNCA	RGCs
CXCR4	2.22e-307	1.89049	0.859	0.092	4.38e-303	8	CXCR4	RGCs
NRN1	0	1.88991	0.707	0.027	0	8	NRN1	RGCs
BASP1	3.85e-134	1.88809	0.996	0.815	7.6e-130	8	BASP1	RGCs
POU4F2	0	1.84581	0.824	0.023	0	8	POU4F2	RGCs
GNG3	0	1.83719	0.859	0.033	0	8	GNG3	RGCs
ELAVL2	0	1.8261	0.879	0.053	0	8	ELAVL2	RGCs
KIF5C	0	1.82487	0.91	0.063	0	8	KIF5C	RGCs
MAP2	7.66e-296	1.81424	0.961	0.139	1.51e-291	8	MAP2	RGCs
CADM1	1.37e-149	1.80352	0.934	0.322	2.7e-145	8	CADM1	RGCs
GPM6A1	0	1.79079	0.922	0.094	0	8	GPM6A	RGCs
CKB1	9.94e-130	1.76469	1	0.471	1.97e-125	8	CKB	RGCs
ACAT2	2.5e-155	1.76299	0.875	0.238	4.95e-151	8	ACAT2	RGCs
RORB1	7e-168	1.74798	0.918	0.224	1.38e-163	8	RORB	RGCs
CCNI	2.95e-133	1.73369	1	0.857	5.84e-129	8	CCNI	RGCs
PCBP4	4.2e-180	1.73106	0.961	0.268	8.3e-176	8	PCBP4	RGCs
NHLH2	0	1.70078	0.801	0.025	0	8	NHLH2	RGCs
SCG3	0	1.69377	0.91	0.03	0	8	SCG3	RGCs
JPT1	1.29e-121	1.65761	0.988	0.643	2.55e-117	8	JPT1	RGCs
FDFT11	1.15e-150	1.64143	0.926	0.304	2.28e-146	8	FDFT1	RGCs
CXXC51	4.47e-196	1.63672	0.934	0.216	8.83e-192	8	CXXC5	RGCs
EEF1A2	0	1.63636	0.723	0.039	0	8	EEF1A2	RGCs
ONECUT2	0	1.62301	0.746	0.036	0	8	ONECUT2	RGCs
BNIP3	6.14e-134	1.60331	0.91	0.317	1.21e-129	8	BNIP3	RGCs
ANK2	2.67e-194	1.55907	0.828	0.158	5.29e-190	8	ANK2	RGCs
KLF7	7.59e-243	1.55795	0.883	0.143	1.5e-238	8	KLF7	RGCs
STMN11	8.89e-132	1.55772	1	0.965	1.76e-127	8	STMN1	RGCs
RBP12	1.98e-86	1.54083	1	0.783	3.92e-82	8	RBP1	RGCs
HMGCR	1.51e-168	1.50479	0.852	0.194	2.98e-164	8	HMGCR	RGCs
C14orf132	1.01e-178	1.49551	0.875	0.201	1.99e-174	8	C14orf132	RGCs
SQLE	4.66e-104	1.49194	0.883	0.369	9.21e-100	8	SQLE	RGCs
ISLR2	0	1.48728	0.816	0.036	0	8	ISLR2	RGCs
MAP6	0	1.47837	0.867	0.06	0	8	MAP6	RGCs
ETFB	5.9e-117	1.47519	0.969	0.486	1.17e-112	8	ETFB	RGCs
PAFAH1B3	1.05e-81	1.46851	0.941	0.662	2.08e-77	8	PAFAH1B3	RGCs
CELF4	0	1.43826	0.758	0.053	0	8	CELF4	RGCs
DLL3	1.18e-286	1.43407	0.773	0.073	2.33e-282	8	DLL3	RGCs
APLP1	0	1.41572	0.836	0.083	0	8	APLP1	RGCs
ENO2	0	1.41217	0.828	0.066	0	8	ENO2	RGCs
TMSB10	6.78e-105	1.40739	1	0.994	1.34e-100	8	TMSB10	RGCs
DST	9.87e-149	1.40482	0.883	0.242	1.95e-144	8	DST	RGCs
CAMK2N11	1.98e-148	1.40439	0.902	0.26	3.91e-144	8	CAMK2N1	RGCs
TMEM97	3.73e-138	1.39423	0.828	0.221	7.36e-134	8	TMEM97	RGCs
SCG5	3.47e-111	1.38334	0.883	0.312	6.86e-107	8	SCG5	RGCs
NCAM1	5.15e-126	1.37563	0.918	0.326	1.02e-121	8	NCAM1	RGCs
MAB21L2	0	1.35894	0.812	0.063	0	8	MAB21L2	RGCs
PPP1R1A	0	1.35808	0.809	0.059	0	8	PPP1R1A	RGCs
MAPT	0	1.35069	0.754	0.04	0	8	MAPT	RGCs
TUBB1	2.11e-106	1.34644	1	0.962	4.18e-102	8	TUBB	RGCs
MARCKSL1	3.9e-125	1.3386	1	0.898	7.71e-121	8	MARCKSL1	RGCs
CDKN2D	5.53e-164	1.32354	0.82	0.177	1.09e-159	8	CDKN2D	RGCs
POU2F2	0	1.32067	0.676	0.034	0	8	POU2F2	RGCs
EBF11	5.15e-91	1.31562	0.871	0.373	1.02e-86	8	EBF1	RGCs
KLC1	1.26e-143	1.30941	0.902	0.283	2.5e-139	8	KLC1	RGCs
GDI1	6.96e-167	1.30681	0.945	0.272	1.38e-162	8	GDI1	RGCs
KIF21A	2.09e-275	1.30522	0.848	0.099	4.13e-271	8	KIF21A	RGCs
ARL4C	3.27e-253	1.29804	0.828	0.103	6.46e-249	8	ARL4C	RGCs
CHRNA3	0	1.2946	0.754	0.019	0	8	CHRNA3	RGCs
TMSB15A2	1.85e-105	1.28655	0.977	0.515	3.66e-101	8	TMSB15A	RGCs
PKM1	5.67e-96	1.28287	0.961	0.597	1.12e-91	8	PKM	RGCs
SCD	3.16e-162	1.28179	0.82	0.174	6.24e-158	8	SCD	RGCs
DPYSL31	2.59e-106	1.27984	0.887	0.336	5.13e-102	8	DPYSL3	RGCs
CALB2	3.26e-300	1.27834	0.535	0.025	6.45e-296	8	CALB2	RGCs
ATP6V0B	1.73e-103	1.26581	0.949	0.536	3.43e-99	8	ATP6V0B	RGCs
HES61	3.92e-209	1.26192	0.812	0.115	7.74e-205	8	HES6	RGCs
YWHAH	2.35e-88	1.24775	0.961	0.587	4.65e-84	8	YWHAH	RGCs
DAAM11	2.13e-108	1.24105	0.898	0.366	4.22e-104	8	DAAM1	RGCs
FAM57B	0	1.23761	0.84	0.021	0	8	FAM57B	RGCs
NKAIN3	0	1.22832	0.676	0.04	0	8	NKAIN3	RGCs
CXADR	5.23e-243	1.22761	0.789	0.096	1.03e-238	8	CXADR	RGCs
YWHAZ	1.43e-105	1.22677	0.988	0.776	2.83e-101	8	YWHAZ	RGCs
YWHAB	1.58e-98	1.21926	0.973	0.685	3.12e-94	8	YWHAB	RGCs
RGS10	1.29e-100	1.21865	0.688	0.181	2.54e-96	8	RGS10	RGCs
YWHAG	1.76e-107	1.21506	0.918	0.423	3.47e-103	8	YWHAG	RGCs
CDH21	4.29e-166	1.21153	0.91	0.21	8.49e-162	8	CDH2	RGCs
SOX4	2.29e-88	1.2112	1	0.906	4.53e-84	8	SOX4	RGCs
DYNC1LI1	3.22e-118	1.20319	0.902	0.334	6.36e-114	8	DYNC1LI1	RGCs
ENO11	3e-81	1.20139	0.961	0.682	5.93e-77	8	ENO1	RGCs
YWHAQ	1.32e-96	1.19267	0.984	0.775	2.61e-92	8	YWHAQ	RGCs
NKAIN41	1.73e-107	1.17758	0.82	0.239	3.43e-103	8	NKAIN4	RGCs
PLPPR3	1.38e-126	1.16874	0.863	0.25	2.73e-122	8	PLPPR3	RGCs
SEZ6L2	7.33e-197	1.1683	0.793	0.122	1.45e-192	8	SEZ6L2	RGCs
ATP1A3	0	1.16261	0.812	0.024	0	8	ATP1A3	RGCs
RUFY3	1e-147	1.16235	0.898	0.257	1.98e-143	8	RUFY3	RGCs
TERF2IP	3.78e-100	1.1569	0.973	0.623	7.48e-96	8	TERF2IP	RGCs
CHD71	2.54e-223	1.15253	0.844	0.121	5.01e-219	8	CHD7	RGCs
DDIT41	7.11e-93	1.14757	0.848	0.308	1.41e-88	8	DDIT4	RGCs
LDHA	4.71e-68	1.14221	0.961	0.725	9.31e-64	8	LDHA	RGCs
DYNC1H1	1.92e-85	1.14034	0.93	0.537	3.79e-81	8	DYNC1H1	RGCs
SLC18A2	0	1.13498	0.707	0.02	0	8	SLC18A2	RGCs
NEUROD11	1.27e-258	1.13492	0.473	0.022	2.51e-254	8	NEUROD1	RGCs
FADS11	2.86e-138	1.12976	0.844	0.217	5.66e-134	8	FADS1	RGCs
VAMP2	1.95e-79	1.12706	0.895	0.537	3.86e-75	8	VAMP2	RGCs
TRIM36	0	1.12238	0.781	0.04	0	8	TRIM36	RGCs
CCDC112	5.88e-160	1.12079	0.867	0.196	1.16e-155	8	CCDC112	RGCs
CADPS	0	1.10882	0.758	0.027	0	8	CADPS	RGCs
RAB311	4.03e-124	1.10822	0.699	0.153	7.96e-120	8	RAB31	RGCs
BCL7A	5.51e-114	1.10448	0.836	0.252	1.09e-109	8	BCL7A	RGCs
CRIP2	1.04e-186	1.1042	0.789	0.132	2.06e-182	8	CRIP2	RGCs
KIF1A	7.95e-301	1.09936	0.812	0.079	1.57e-296	8	KIF1A	RGCs
GDAP1L1	0	1.09727	0.738	0.029	0	8	GDAP1L1	RGCs
MAB21L11	2.05e-153	1.09682	0.879	0.181	4.04e-149	8	MAB21L1	RGCs
FDPS1	1.46e-78	1.0968	0.914	0.468	2.88e-74	8	FDPS	RGCs
ZIC21	5.89e-217	1.09549	0.668	0.068	1.16e-212	8	ZIC2	RGCs
EBF3	1.25e-75	1.09252	0.738	0.258	2.48e-71	8	EBF3	RGCs
MSI21	1.49e-92	1.091	0.887	0.378	2.94e-88	8	MSI2	RGCs
PPP1R14B	1.77e-81	1.08703	0.969	0.68	3.49e-77	8	PPP1R14B	RGCs
RTN31	3.62e-95	1.0868	0.945	0.461	7.16e-91	8	RTN3	RGCs
AKAP6	0	1.0865	0.73	0.03	0	8	AKAP6	RGCs
L1CAM	0	1.07754	0.707	0.022	0	8	L1CAM	RGCs
SH3BGRL3	5.7e-66	1.07747	0.973	0.644	1.13e-61	8	SH3BGRL3	RGCs
MSMO1	2.17e-75	1.07671	0.863	0.395	4.28e-71	8	MSMO1	RGCs
EDIL3	2.72e-123	1.07334	0.781	0.186	5.37e-119	8	EDIL3	RGCs
PKIA	3.84e-143	1.06883	0.852	0.211	7.58e-139	8	PKIA	RGCs
PHYHIPL1	3.46e-304	1.06739	0.812	0.073	6.84e-300	8	PHYHIPL	RGCs
SYT11	7.98e-205	1.06685	0.824	0.132	1.58e-200	8	SYT11	RGCs
GPI	1.89e-108	1.06551	0.816	0.262	3.74e-104	8	GPI	RGCs
GNAO1	0	1.06397	0.672	0.016	0	8	GNAO1	RGCs
KIDINS220	2.68e-71	1.06133	0.859	0.44	5.3e-67	8	KIDINS220	RGCs
ADD2	0	1.05827	0.781	0.036	0	8	ADD2	RGCs
SBK1	4.1e-201	1.05748	0.828	0.136	8.1e-197	8	SBK1	RGCs
XPR1	1.21e-206	1.05547	0.766	0.11	2.39e-202	8	XPR1	RGCs
FASN	8.02e-151	1.04671	0.785	0.165	1.58e-146	8	FASN	RGCs
CALM3	1.42e-82	1.04094	0.973	0.726	2.81e-78	8	CALM3	RGCs
MYEF21	6.02e-147	1.03976	0.844	0.198	1.19e-142	8	MYEF2	RGCs
DPYSL5	0	1.03709	0.812	0.043	0	8	DPYSL5	RGCs
HEY11	2e-86	1.03661	0.625	0.146	3.95e-82	8	HEY1	RGCs
MINDY2	1.73e-107	1.03161	0.855	0.285	3.43e-103	8	MINDY2	RGCs
SLC38A1	2.46e-120	1.03123	0.824	0.236	4.86e-116	8	SLC38A1	RGCs
FNBP1L	6.49e-86	1.02065	0.914	0.44	1.28e-81	8	FNBP1L	RGCs
AC010247.2	0	1.01891	0.566	0.013	0	8	AC010247.2	RGCs
RNF165	3.34e-250	1.01847	0.758	0.082	6.6e-246	8	RNF165	RGCs
2003-09-01	0	1.01842	0.73	0.055	0	8	2003-09-01	RGCs
RAX1	8.85e-139	1.01544	0.613	0.089	1.75e-134	8	RAX	RGCs
RAB6B	4.65e-268	1.01222	0.758	0.077	9.19e-264	8	RAB6B	RGCs
KIF3A	2.04e-129	1.01108	0.809	0.209	4.04e-125	8	KIF3A	RGCs
CFL1	8.74e-97	1.00401	1	0.926	1.73e-92	8	CFL1	RGCs
AC010931.21	0	1.00313	0.742	0.036	0	8	AC010931.2	RGCs
EPB41	1.51e-100	0.999244	0.844	0.29	2.98e-96	8	EPB41	RGCs
CEP170	1.12e-84	0.995912	0.898	0.417	2.22e-80	8	CEP170	RGCs
FZD31	8.18e-121	0.994136	0.809	0.213	1.62e-116	8	FZD3	RGCs
DTD1	1.08e-132	0.994065	0.91	0.26	2.13e-128	8	DTD1	RGCs
TBCB	3.42e-75	0.993276	0.934	0.554	6.75e-71	8	TBCB	RGCs
FXYD6	3.07e-91	0.988312	0.902	0.39	6.06e-87	8	FXYD6	RGCs
POU4F1	0	0.985875	0.492	0.009	0	8	POU4F1	RGCs
DCC	6.9e-258	0.983827	0.559	0.036	1.36e-253	8	DCC	RGCs
YWHAE	4.94e-97	0.98275	0.996	0.921	9.76e-93	8	YWHAE	RGCs
HDAC2	2e-81	0.979839	0.957	0.619	3.95e-77	8	HDAC2	RGCs
SMAD9	9.73e-82	0.979544	0.75	0.244	1.92e-77	8	SMAD9	RGCs
DPYSL4	7.33e-246	0.979218	0.785	0.092	1.45e-241	8	DPYSL4	RGCs
KLHL35	3.07e-279	0.975534	0.629	0.044	6.06e-275	8	KLHL35	RGCs
RGS16	9.22e-63	0.972465	0.438	0.1	1.82e-58	8	RGS16	RGCs
NKAIN1	0	0.972461	0.754	0.062	0	8	NKAIN1	RGCs
LINC018331	7.48e-285	0.969373	0.73	0.059	1.48e-280	8	LINC01833	RGCs
SST	0	0.968437	0.438	0.009	0	8	SST	RGCs
RBPMS	2.25e-88	0.967987	0.648	0.176	4.44e-84	8	RBPMS	RGCs
PGK1	5.75e-73	0.965395	0.941	0.554	1.14e-68	8	PGK1	RGCs
ROBO2	7.04e-171	0.961242	0.773	0.13	1.39e-166	8	ROBO2	RGCs
PGM2L1	2.59e-120	0.95895	0.789	0.203	5.12e-116	8	PGM2L1	RGCs
AP1S2	4.66e-90	0.956329	0.832	0.301	9.21e-86	8	AP1S2	RGCs
ACVR2B	1.1e-232	0.952545	0.773	0.095	2.17e-228	8	ACVR2B	RGCs
PTMA1	2.22e-100	0.946954	1	0.991	4.39e-96	8	PTMA	RGCs
MAPK10	5.6e-181	0.94501	0.812	0.138	1.11e-176	8	MAPK10	RGCs
CHD4	1.53e-76	0.943438	0.914	0.485	3.03e-72	8	CHD4	RGCs
TLE4	2.56e-53	0.938426	0.906	0.519	5.07e-49	8	TLE4	RGCs
WRB	8.53e-93	0.936583	0.844	0.303	1.69e-88	8	WRB	RGCs
IDH1	4.23e-137	0.933164	0.809	0.188	8.37e-133	8	IDH1	RGCs
PTMS	2.85e-78	0.931778	1	0.904	5.63e-74	8	PTMS	RGCs
BEX2	9.53e-72	0.927266	0.863	0.412	1.88e-67	8	BEX2	RGCs
DACH11	2.77e-90	0.927228	0.867	0.313	5.47e-86	8	DACH1	RGCs
NDRG4	0	0.923948	0.723	0.035	0	8	NDRG4	RGCs
CELF3	0	0.921444	0.734	0.013	0	8	CELF3	RGCs
DYNLT1	3.38e-65	0.920852	0.957	0.676	6.68e-61	8	DYNLT1	RGCs
CADM2	1.01e-151	0.91912	0.75	0.134	1.99e-147	8	CADM2	RGCs
CALM1	8.83e-54	0.916479	0.973	0.771	1.75e-49	8	CALM1	RGCs
CENPV1	1.06e-79	0.913728	0.938	0.464	2.09e-75	8	CENPV	RGCs
GPC2	6.52e-209	0.913179	0.773	0.106	1.29e-204	8	GPC2	RGCs
ATL1	4.91e-225	0.911884	0.754	0.091	9.71e-221	8	ATL1	RGCs
YBX11	2.79e-91	0.911815	0.996	0.957	5.51e-87	8	YBX1	RGCs
DYNC1I2	1.66e-68	0.910366	0.977	0.741	3.27e-64	8	DYNC1I2	RGCs
KIF5A	0	0.909623	0.699	0.022	0	8	KIF5A	RGCs
KIF1B	7.58e-90	0.908626	0.836	0.304	1.5e-85	8	KIF1B	RGCs
ANK3	1.03e-97	0.90789	0.719	0.193	2.04e-93	8	ANK3	RGCs
SEZ6L	0	0.906037	0.555	0.015	0	8	SEZ6L	RGCs
HES51	3.78e-39	0.901358	0.332	0.083	7.46e-35	8	HES5	RGCs
DHCR24	7.99e-168	0.899683	0.68	0.101	1.58e-163	8	DHCR24	RGCs
IDI1	4.11e-62	0.899634	0.832	0.405	8.13e-58	8	IDI1	RGCs
TUBB3	0	0.895614	0.715	0.015	0	8	TUBB3	RGCs
GAL	3.85e-48	0.895312	0.289	0.054	7.61e-44	8	GAL	RGCs
RAB3A	1.16e-297	0.894941	0.672	0.048	2.29e-293	8	RAB3A	RGCs
OCIAD2	2.2e-95	0.88985	0.867	0.315	4.35e-91	8	OCIAD2	RGCs
INSM1	0	0.88681	0.609	0.019	0	8	INSM1	RGCs
MAP1LC3B	5.05e-77	0.882536	0.941	0.482	9.98e-73	8	MAP1LC3B	RGCs
C16orf451	9.95e-97	0.876925	0.855	0.308	1.97e-92	8	C16orf45	RGCs
ARPP19	8.2e-69	0.8765	0.93	0.566	1.62e-64	8	ARPP19	RGCs
TCAF1	4.77e-73	0.876042	0.875	0.395	9.42e-69	8	TCAF1	RGCs
HSBP1	4.39e-73	0.875698	0.992	0.831	8.67e-69	8	HSBP1	RGCs
RPAIN	3.78e-84	0.874493	0.914	0.435	7.47e-80	8	RPAIN	RGCs
VDAC3	8.26e-70	0.87321	0.922	0.498	1.63e-65	8	VDAC3	RGCs
PCSK2	0	0.873018	0.66	0.026	0	8	PCSK2	RGCs
AC120042.3	0	0.871109	0.602	0.025	0	8	AC120042.3	RGCs
EIF4A1	4.92e-69	0.870136	0.949	0.63	9.72e-65	8	EIF4A1	RGCs
VAT1	6.07e-117	0.865788	0.816	0.219	1.2e-112	8	VAT1	RGCs
CLDN5	4.5e-297	0.864362	0.52	0.023	8.89e-293	8	CLDN5	RGCs
APC	9.02e-80	0.859274	0.734	0.238	1.78e-75	8	APC	RGCs
MAP4K4	1.73e-74	0.859259	0.895	0.437	3.41e-70	8	MAP4K4	RGCs
MXRA7	6.5e-101	0.858256	0.797	0.23	1.28e-96	8	MXRA7	RGCs
TSPAN7	4.76e-202	0.856847	0.73	0.095	9.41e-198	8	TSPAN7	RGCs
CTNND2	0	0.855128	0.715	0.05	0	8	CTNND2	RGCs
GNB1	3.71e-70	0.853123	0.918	0.517	7.34e-66	8	GNB1	RGCs
ZNF804A	0	0.852476	0.648	0.02	0	8	ZNF804A	RGCs
CDK5R1	0	0.852072	0.664	0.038	0	8	CDK5R1	RGCs
FYN	6.82e-102	0.850266	0.84	0.268	1.35e-97	8	FYN	RGCs
MGST3	4.67e-50	0.850129	0.941	0.724	9.23e-46	8	MGST3	RGCs
SCD5	1.48e-100	0.849774	0.676	0.163	2.92e-96	8	SCD5	RGCs
TRH1	1.78e-266	0.848266	0.594	0.039	3.51e-262	8	TRH	RGCs
FGF13	8.43e-157	0.843479	0.707	0.116	1.67e-152	8	FGF13	RGCs
BNIP3L	2.51e-65	0.842432	0.926	0.573	4.96e-61	8	BNIP3L	RGCs
FKBP1B	2.44e-137	0.840089	0.691	0.124	4.82e-133	8	FKBP1B	RGCs
SRRM4	0	0.839291	0.676	0.013	0	8	SRRM4	RGCs
RBFOX3	0	0.838313	0.668	0.012	0	8	RBFOX3	RGCs
TSPAN13	2.03e-213	0.836454	0.73	0.088	4.01e-209	8	TSPAN13	RGCs
ACLY	6.17e-112	0.834683	0.75	0.194	1.22e-107	8	ACLY	RGCs
MYCN1	3.91e-264	0.834067	0.672	0.056	7.73e-260	8	MYCN	RGCs
SRP91	7.91e-74	0.831552	0.992	0.821	1.56e-69	8	SRP9	RGCs
LCOR	1.39e-130	0.830385	0.809	0.191	2.74e-126	8	LCOR	RGCs
PRRT2	2.21e-115	0.829564	0.77	0.189	4.37e-111	8	PRRT2	RGCs
VSTM2L	0	0.829521	0.633	0.022	0	8	VSTM2L	RGCs
VPS35	3.46e-76	0.82927	0.922	0.483	6.85e-72	8	VPS35	RGCs
C1QL1	2.73e-211	0.827812	0.52	0.04	5.4e-207	8	C1QL1	RGCs
SYT7	0	0.827447	0.641	0.026	0	8	SYT7	RGCs
KLHL24	5.06e-93	0.825605	0.777	0.244	1e-88	8	KLHL24	RGCs
GABARAPL2	2.22e-71	0.823956	0.973	0.747	4.38e-67	8	GABARAPL2	RGCs
ZFHX3	1.31e-56	0.823826	0.797	0.375	2.59e-52	8	ZFHX3	RGCs
NOVA2	0	0.821629	0.68	0.018	0	8	NOVA2	RGCs
CTXN11	2.64e-125	0.820933	0.789	0.186	5.22e-121	8	CTXN1	RGCs
HSP90AA11	4.38e-71	0.819356	1	0.957	8.65e-67	8	HSP90AA1	RGCs
HNRNPAB1	6.35e-73	0.818549	0.949	0.491	1.25e-68	8	HNRNPAB	RGCs
CMIP	2.15e-109	0.81826	0.75	0.194	4.26e-105	8	CMIP	RGCs
DYNLRB1	2.54e-57	0.81485	0.961	0.695	5.02e-53	8	DYNLRB1	RGCs
KCTD16	0	0.813557	0.629	0.029	0	8	KCTD16	RGCs
SMARCA4	3.74e-81	0.813116	0.867	0.358	7.38e-77	8	SMARCA4	RGCs
GNG2	1.1e-118	0.811974	0.715	0.157	2.18e-114	8	GNG2	RGCs
CYCS	1.55e-71	0.811882	0.957	0.563	3.07e-67	8	CYCS	RGCs
PGAM1	1.44e-58	0.80564	0.918	0.593	2.86e-54	8	PGAM1	RGCs
NNAT1	3.44e-76	0.805203	0.93	0.393	6.79e-72	8	NNAT	RGCs
NDUFB8	4.03e-56	0.804011	0.965	0.753	7.95e-52	8	NDUFB8	RGCs
ACSL4	5.37e-250	0.80223	0.688	0.063	1.06e-245	8	ACSL4	RGCs
TPI1	5.64e-52	0.802085	0.98	0.812	1.11e-47	8	TPI1	RGCs
SCARB2	1e-71	0.801228	0.844	0.373	1.98e-67	8	SCARB2	RGCs
VAX2	1.88e-306	0.80042	0.566	0.028	3.71e-302	8	VAX2	RGCs
RAB33A	0	0.799971	0.707	0.035	0	8	RAB33A	RGCs
GTF2I	1.1e-61	0.797703	0.961	0.697	2.18e-57	8	GTF2I	RGCs
ARPC5	2.13e-55	0.796498	0.926	0.581	4.21e-51	8	ARPC5	RGCs
LRRN3	3.09e-177	0.79623	0.703	0.097	6.1e-173	8	LRRN3	RGCs
LINC01003	3.68e-150	0.795244	0.75	0.14	7.27e-146	8	LINC01003	RGCs
STMN3	3.39e-117	0.793442	0.773	0.186	6.7e-113	8	STMN3	RGCs
GDAP1	3.69e-197	0.792704	0.723	0.094	7.3e-193	8	GDAP1	RGCs
EPS8L1	0	0.791646	0.656	0.016	0	8	EPS8L1	RGCs
PBX3	9.35e-94	0.79037	0.777	0.229	1.85e-89	8	PBX3	RGCs
CELF2	1.47e-101	0.789978	0.824	0.235	2.9e-97	8	CELF2	RGCs
VDAC2	1.55e-67	0.788879	0.965	0.707	3.07e-63	8	VDAC2	RGCs
RCOR2	4.98e-203	0.7839	0.68	0.078	9.84e-199	8	RCOR2	RGCs
SERINC1	1.21e-59	0.783656	0.875	0.481	2.39e-55	8	SERINC1	RGCs
MIDN1	1.68e-81	0.782793	0.863	0.332	3.32e-77	8	MIDN	RGCs
ZBTB20	1.12e-59	0.780071	0.805	0.354	2.21e-55	8	ZBTB20	RGCs
ARHGAP21	1.75e-87	0.777129	0.801	0.268	3.45e-83	8	ARHGAP21	RGCs
TTC3	1.21e-57	0.776092	0.984	0.804	2.4e-53	8	TTC3	RGCs
TUBB4A	0	0.774257	0.637	0.025	0	8	TUBB4A	RGCs
KIFAP3	1.16e-65	0.774141	0.859	0.365	2.29e-61	8	KIFAP3	RGCs
CTNNA2	0	0.773888	0.617	0.016	0	8	CTNNA2	RGCs
PPP2R2B	0	0.772508	0.586	0.023	0	8	PPP2R2B	RGCs
AASDHPPT	7.49e-66	0.772385	0.871	0.428	1.48e-61	8	AASDHPPT	RGCs
AL391650.1	0	0.770805	0.668	0.036	0	8	AL391650.1	RGCs
SEC11C	2.59e-101	0.770556	0.809	0.232	5.12e-97	8	SEC11C	RGCs
COX5A	1.56e-66	0.770513	0.957	0.638	3.09e-62	8	COX5A	RGCs
C3orf14	1.1e-128	0.768443	0.816	0.192	2.18e-124	8	C3orf14	RGCs
ATCAY	0	0.767788	0.656	0.011	0	8	ATCAY	RGCs
RNF5	1.23e-71	0.767089	0.848	0.356	2.42e-67	8	RNF5	RGCs
ZC2HC1A	9.89e-62	0.765952	0.844	0.389	1.95e-57	8	ZC2HC1A	RGCs
PTPRF	5.11e-114	0.76589	0.707	0.157	1.01e-109	8	PTPRF	RGCs
ATP6V1G2	0	0.765353	0.648	0.032	0	8	ATP6V1G2	RGCs
MIF	2.19e-52	0.764213	0.961	0.709	4.33e-48	8	MIF	RGCs
CD200	7.51e-103	0.763407	0.785	0.214	1.48e-98	8	CD200	RGCs
SIX3-AS1	0	0.761989	0.641	0.033	0	8	SIX3-AS1	RGCs
SINHCAF1	3.48e-66	0.761262	0.855	0.373	6.87e-62	8	SINHCAF	RGCs
SRGAP1	5.24e-104	0.761194	0.793	0.21	1.03e-99	8	SRGAP1	RGCs
PEBP11	8.6e-64	0.760163	0.988	0.858	1.7e-59	8	PEBP1	RGCs
CACNA1A	5.09e-129	0.759238	0.621	0.106	1.01e-124	8	CACNA1A	RGCs
PAK2	2.09e-62	0.758919	0.914	0.484	4.13e-58	8	PAK2	RGCs
STARD3NL	5.66e-91	0.754263	0.844	0.28	1.12e-86	8	STARD3NL	RGCs
ADAM11	0	0.753991	0.574	0.017	0	8	ADAM11	RGCs
SERP2	2.16e-202	0.752313	0.684	0.08	4.28e-198	8	SERP2	RGCs
ACOT7	7.6e-145	0.751999	0.637	0.103	1.5e-140	8	ACOT7	RGCs
GAPDH1	1.03e-77	0.751857	1	0.984	2.04e-73	8	GAPDH	RGCs
CUTA	1.11e-56	0.75038	0.969	0.736	2.18e-52	8	CUTA	RGCs
COX7A2	2.76e-68	0.750032	0.992	0.908	5.45e-64	8	COX7A2	RGCs
MEIS3	5.21e-79	0.7494	0.734	0.225	1.03e-74	8	MEIS3	RGCs
MSI11	2.08e-124	0.748976	0.684	0.129	4.1e-120	8	MSI1	RGCs
TTC9B	0	0.744423	0.594	0.013	0	8	TTC9B	RGCs
DUSP4	2.25e-269	0.744052	0.617	0.043	4.44e-265	8	DUSP4	RGCs
DNAJB6	2.61e-50	0.743785	0.918	0.648	5.15e-46	8	DNAJB6	RGCs
CPLX2	0	0.741748	0.594	0.009	0	8	CPLX2	RGCs
IRX2	1.28e-33	0.741339	0.715	0.382	2.53e-29	8	IRX2	RGCs
SIX61	3.35e-193	0.740854	0.695	0.079	6.61e-189	8	SIX6	RGCs
NELL2	1.99e-74	0.737459	0.848	0.297	3.93e-70	8	NELL2	RGCs
KDM1A	4.51e-62	0.736945	0.844	0.394	8.91e-58	8	KDM1A	RGCs
CISD1	8.66e-84	0.736141	0.816	0.271	1.71e-79	8	CISD1	RGCs
CSDE1	1.9e-57	0.734766	0.965	0.696	3.74e-53	8	CSDE1	RGCs
BZW2	8.19e-64	0.733973	0.887	0.427	1.62e-59	8	BZW2	RGCs
TM7SF2	2.29e-164	0.733371	0.703	0.105	4.52e-160	8	TM7SF2	RGCs
CHRNB3	0	0.732242	0.555	0.007	0	8	CHRNB3	RGCs
MIR124-2HG	0	0.731302	0.637	0.022	0	8	MIR124-2HG	RGCs
TOX3	3.67e-218	0.730108	0.625	0.059	7.25e-214	8	TOX3	RGCs
GRIA2	2.68e-300	0.728701	0.625	0.037	5.3e-296	8	GRIA2	RGCs
CSRNP3	7.34e-104	0.728356	0.75	0.188	1.45e-99	8	CSRNP3	RGCs
SH3BGRL2	2.66e-216	0.72717	0.707	0.079	5.26e-212	8	SH3BGRL2	RGCs
PCMT1	2.65e-58	0.726713	0.887	0.493	5.23e-54	8	PCMT1	RGCs
SMS	4.73e-65	0.726092	0.867	0.385	9.34e-61	8	SMS	RGCs
CHGB	0	0.725045	0.625	0.015	0	8	CHGB	RGCs
RAB3B	1.94e-204	0.723714	0.633	0.066	3.83e-200	8	RAB3B	RGCs
FNDC5	5.36e-71	0.723258	0.738	0.244	1.06e-66	8	FNDC5	RGCs
ADCY1	1.08e-191	0.722339	0.641	0.072	2.13e-187	8	ADCY1	RGCs
FAM241B	2.08e-180	0.722272	0.691	0.092	4.11e-176	8	FAM241B	RGCs
DCLK1	7.88e-145	0.721149	0.676	0.11	1.56e-140	8	DCLK1	RGCs
MAP4	1.89e-49	0.720807	0.867	0.467	3.73e-45	8	MAP4	RGCs
RASD1	6.42e-292	0.719415	0.477	0.019	1.27e-287	8	RASD1	RGCs
TMEM14A	9.74e-73	0.718758	0.773	0.271	1.92e-68	8	TMEM14A	RGCs
MEIS11	6.53e-252	0.718696	0.691	0.06	1.29e-247	8	MEIS1	RGCs
CLU2	1.58e-57	0.718482	0.883	0.43	3.12e-53	8	CLU	RGCs
H3F3A	2.94e-101	0.71835	1	0.995	5.8e-97	8	H3F3A	RGCs
FAM213A	6.39e-61	0.717928	0.863	0.406	1.26e-56	8	FAM213A	RGCs
SET1	1.9e-57	0.713969	0.992	0.889	3.75e-53	8	SET	RGCs
CADM3	0	0.713943	0.645	0.032	0	8	CADM3	RGCs
NTM	5.44e-73	0.713602	0.645	0.176	1.07e-68	8	NTM	RGCs
MAPRE2	5.85e-89	0.712633	0.746	0.216	1.16e-84	8	MAPRE2	RGCs
MEAF6	2.58e-58	0.711805	0.887	0.472	5.11e-54	8	MEAF6	RGCs
CCT2	2.19e-59	0.710932	0.961	0.648	4.33e-55	8	CCT2	RGCs
H2AFY1	6.11e-53	0.710687	0.91	0.575	1.21e-48	8	H2AFY	RGCs
EBP	2.95e-81	0.709977	0.746	0.232	5.83e-77	8	EBP	RGCs
SMARCA5	2.4e-49	0.709876	0.875	0.481	4.74e-45	8	SMARCA5	RGCs
SVBP	3e-49	0.70735	0.941	0.638	5.94e-45	8	SVBP	RGCs
DBN1	2.74e-54	0.706874	0.887	0.498	5.41e-50	8	DBN1	RGCs
HIST3H2A	6.89e-80	0.704689	0.777	0.248	1.36e-75	8	HIST3H2A	RGCs
HSPA12A	2.58e-303	0.70428	0.617	0.036	5.1e-299	8	HSPA12A	RGCs
SMIM18	0	0.704059	0.598	0.01	0	8	SMIM18	RGCs
SLC17A6	0	0.703911	0.504	0.008	0	8	SLC17A6	RGCs
LINGO1	3.49e-207	0.703442	0.656	0.07	6.9e-203	8	LINGO1	RGCs
SLIT1	0	0.702354	0.559	0.017	0	8	SLIT1	RGCs
CASP3	7.47e-122	0.701934	0.695	0.139	1.48e-117	8	CASP3	RGCs
EVL	1.87e-57	0.701769	0.887	0.491	3.7e-53	8	EVL	RGCs
PPA11	2.86e-59	0.701028	0.906	0.505	5.65e-55	8	PPA1	RGCs
ARID1B	6.26e-55	0.700651	0.898	0.484	1.24e-50	8	ARID1B	RGCs
GABRB3	0	0.700539	0.699	0.047	0	8	GABRB3	RGCs
ARL31	1.74e-56	0.696225	0.93	0.558	3.43e-52	8	ARL3	RGCs
NAGK	4.59e-63	0.696164	0.793	0.309	9.08e-59	8	NAGK	RGCs
MAPK8IP2	0	0.694489	0.633	0.017	0	8	MAPK8IP2	RGCs
GLRX	6.25e-183	0.693214	0.629	0.074	1.24e-178	8	GLRX	RGCs
ELP41	4.21e-96	0.692588	0.777	0.211	8.32e-92	8	ELP4	RGCs
INSIG1	5.49e-116	0.691455	0.695	0.143	1.09e-111	8	INSIG1	RGCs
DYNLT3	6.25e-111	0.690859	0.762	0.181	1.23e-106	8	DYNLT3	RGCs
TPPP3	9.28e-214	0.690077	0.66	0.066	1.83e-209	8	TPPP3	RGCs
SLC25A4	6.51e-110	0.689196	0.777	0.188	1.29e-105	8	SLC25A4	RGCs
LINC00599	0	0.689028	0.492	0.016	0	8	LINC00599	RGCs
MVD	7.76e-82	0.688783	0.633	0.164	1.53e-77	8	MVD	RGCs
DNER	0	0.688286	0.59	0.027	0	8	DNER	RGCs
GSE1	6.64e-101	0.687633	0.621	0.132	1.31e-96	8	GSE1	RGCs
CALY	0	0.687416	0.57	0.013	0	8	CALY	RGCs
CSNK1E	1.41e-63	0.687057	0.805	0.336	2.79e-59	8	CSNK1E	RGCs
PNMA1	3.42e-105	0.686987	0.781	0.199	6.76e-101	8	PNMA1	RGCs
REEP1	1.26e-231	0.684558	0.602	0.05	2.5e-227	8	REEP1	RGCs
TBPL1	4.13e-97	0.684304	0.75	0.204	8.16e-93	8	TBPL1	RGCs
GADD45A	1.08e-51	0.684134	0.629	0.209	2.14e-47	8	GADD45A	RGCs
STX7	1.38e-88	0.684033	0.781	0.234	2.73e-84	8	STX7	RGCs
AMER2	0	0.683832	0.586	0.028	0	8	AMER2	RGCs
TPD52	1.09e-274	0.683717	0.621	0.043	2.15e-270	8	TPD52	RGCs
PBRM1	4.44e-66	0.683716	0.848	0.363	8.77e-62	8	PBRM1	RGCs
SEMA6A	9.95e-100	0.683597	0.73	0.179	1.97e-95	8	SEMA6A	RGCs
DBI1	2.09e-46	0.683259	0.945	0.682	4.13e-42	8	DBI	RGCs
KHDRBS1	3.56e-53	0.682597	0.98	0.734	7.03e-49	8	KHDRBS1	RGCs
EIF1AX	2.35e-49	0.681776	0.949	0.701	4.64e-45	8	EIF1AX	RGCs
FXYD7	9.62e-282	0.681716	0.469	0.019	1.9e-277	8	FXYD7	RGCs
ZMIZ1	1.46e-70	0.679737	0.809	0.3	2.88e-66	8	ZMIZ1	RGCs
BAZ1A	4.64e-82	0.67953	0.727	0.213	9.18e-78	8	BAZ1A	RGCs
CCT6A	3.57e-54	0.679518	0.941	0.553	7.06e-50	8	CCT6A	RGCs
ZNF292	1.2e-42	0.678673	0.855	0.537	2.38e-38	8	ZNF292	RGCs
ZNF385A	7.2e-157	0.677761	0.688	0.105	1.42e-152	8	ZNF385A	RGCs
CHN1	3.13e-124	0.677032	0.734	0.151	6.19e-120	8	CHN1	RGCs
SNAP25	1.6e-143	0.675483	0.676	0.106	3.17e-139	8	SNAP25	RGCs
ARL8A	8.15e-79	0.674625	0.754	0.242	1.61e-74	8	ARL8A	RGCs
HRAS	2.81e-74	0.674301	0.758	0.255	5.55e-70	8	HRAS	RGCs
SREBF2	1.4e-109	0.673554	0.742	0.178	2.77e-105	8	SREBF2	RGCs
NUDT3	2.59e-63	0.672388	0.762	0.299	5.13e-59	8	NUDT3	RGCs
ATP5F1B	8.55e-52	0.672319	0.965	0.769	1.69e-47	8	ATP5F1B	RGCs
MAPK6	1.12e-84	0.672254	0.789	0.244	2.22e-80	8	MAPK6	RGCs
PSD3	2.74e-81	0.671963	0.656	0.172	5.41e-77	8	PSD3	RGCs
RIT2	0	0.669779	0.43	0.008	0	8	RIT2	RGCs
ATP1B1	4.45e-75	0.669747	0.852	0.299	8.8e-71	8	ATP1B1	RGCs
CNIH2	6.08e-194	0.667835	0.664	0.077	1.2e-189	8	CNIH2	RGCs
PODXL2	2.99e-62	0.667281	0.773	0.298	5.92e-58	8	PODXL2	RGCs
PRDX2	6.63e-60	0.665629	0.988	0.897	1.31e-55	8	PRDX2	RGCs
VDAC1	1.61e-54	0.664717	0.969	0.658	3.18e-50	8	VDAC1	RGCs
RUNDC3B	0	0.664506	0.578	0.011	0	8	RUNDC3B	RGCs
BTF3L4	1.33e-52	0.661998	0.93	0.584	2.63e-48	8	BTF3L4	RGCs
CLASP2	7.05e-106	0.66142	0.691	0.16	1.39e-101	8	CLASP2	RGCs
NHSL1	2.44e-184	0.659215	0.641	0.075	4.83e-180	8	NHSL1	RGCs
VBP1	5.27e-59	0.656736	0.91	0.466	1.04e-54	8	VBP1	RGCs
ZNF428	4.41e-45	0.656196	0.984	0.76	8.72e-41	8	ZNF428	RGCs
SCN9A	0	0.655479	0.531	0.022	0	8	SCN9A	RGCs
SARAF	6.11e-44	0.655302	0.918	0.617	1.21e-39	8	SARAF	RGCs
FOXD11	4.28e-92	0.65432	0.551	0.112	8.45e-88	8	FOXD1	RGCs
SYNE2	1.84e-56	0.653752	0.758	0.297	3.64e-52	8	SYNE2	RGCs
CCT5	1.68e-48	0.653684	0.906	0.563	3.32e-44	8	CCT5	RGCs
TMEM35A	3.18e-129	0.653272	0.617	0.1	6.28e-125	8	TMEM35A	RGCs
SMDT1	5.94e-52	0.651794	0.957	0.647	1.17e-47	8	SMDT1	RGCs
NHLH1	0	0.651114	0.465	0.005	0	8	NHLH1	RGCs
CARHSP1	2.46e-50	0.649574	0.852	0.436	4.85e-46	8	CARHSP1	RGCs
PIP4P2	4.8e-78	0.648568	0.781	0.253	9.49e-74	8	PIP4P2	RGCs
RAB6A	3.82e-62	0.647511	0.84	0.36	7.54e-58	8	RAB6A	RGCs
RBPMS2	6.73e-247	0.64608	0.562	0.039	1.33e-242	8	RBPMS2	RGCs
AP2B1	1.58e-44	0.645052	0.887	0.522	3.12e-40	8	AP2B1	RGCs
GABBR2	0	0.644912	0.582	0.009	0	8	GABBR2	RGCs
RELN	1.12e-244	0.640975	0.547	0.036	2.22e-240	8	RELN	RGCs
NME1	9.75e-41	0.639796	0.938	0.593	1.93e-36	8	NME1	RGCs
RALYL	6.72e-161	0.639605	0.629	0.081	1.33e-156	8	RALYL	RGCs
ATP6V1G1	1.16e-52	0.638332	0.984	0.873	2.28e-48	8	ATP6V1G1	RGCs
SYP	0	0.638053	0.602	0.03	0	8	SYP	RGCs
DCTN3	1.39e-41	0.638015	0.922	0.652	2.76e-37	8	DCTN3	RGCs
TRIM2	3.18e-101	0.636116	0.715	0.171	6.28e-97	8	TRIM2	RGCs
NRIP11	4.09e-69	0.63603	0.77	0.269	8.08e-65	8	NRIP1	RGCs
CCDC184	0	0.635978	0.59	0.017	0	8	CCDC184	RGCs
GSK3B	5.27e-82	0.634723	0.719	0.212	1.04e-77	8	GSK3B	RGCs
ONECUT1	0	0.634407	0.574	0.016	0	8	ONECUT1	RGCs
SLC16A3	5.91e-197	0.634261	0.586	0.057	1.17e-192	8	SLC16A3	RGCs
EPHA5	3.75e-230	0.634149	0.57	0.044	7.42e-226	8	EPHA5	RGCs
BAZ2B	9.83e-56	0.63329	0.781	0.316	1.94e-51	8	BAZ2B	RGCs
COX6A1	2.11e-46	0.632896	0.988	0.861	4.16e-42	8	COX6A1	RGCs
ASAP2	7.48e-110	0.632405	0.613	0.117	1.48e-105	8	ASAP2	RGCs
NRXN1	5.23e-68	0.631328	0.672	0.199	1.03e-63	8	NRXN1	RGCs
PAIP21	1.24e-46	0.630711	0.938	0.699	2.45e-42	8	PAIP2	RGCs
SATB1	6.52e-86	0.630333	0.691	0.184	1.29e-81	8	SATB1	RGCs
NSG2	0	0.630329	0.461	0.013	0	8	NSG2	RGCs
FMC11	1.9e-58	0.630031	0.855	0.388	3.75e-54	8	FMC1	RGCs
PNMA2	0	0.62929	0.598	0.031	0	8	PNMA2	RGCs
MYT1	0	0.628837	0.594	0.012	0	8	MYT1	RGCs
SARS	4.65e-54	0.628377	0.859	0.413	9.18e-50	8	SARS	RGCs
PFDN4	6.88e-50	0.628035	0.93	0.556	1.36e-45	8	PFDN4	RGCs
APC2	0	0.627228	0.598	0.018	0	8	APC2	RGCs
EPHB1	1.41e-299	0.626303	0.469	0.017	2.78e-295	8	EPHB1	RGCs
JUP	1.76e-103	0.625042	0.691	0.154	3.49e-99	8	JUP	RGCs
GRB2	1.78e-60	0.624905	0.816	0.322	3.52e-56	8	GRB2	RGCs
ATP6V0E2	2.47e-144	0.624311	0.688	0.114	4.89e-140	8	ATP6V0E2	RGCs
COX171	5.98e-58	0.623272	0.875	0.416	1.18e-53	8	COX17	RGCs
SCOC	3.11e-51	0.623239	0.91	0.514	6.15e-47	8	SCOC	RGCs
ARL6IP11	4.72e-61	0.622212	0.883	0.427	9.32e-57	8	ARL6IP1	RGCs
RALGDS	5.27e-93	0.621864	0.711	0.183	1.04e-88	8	RALGDS	RGCs
NOVA1	2.44e-50	0.619853	0.84	0.395	4.82e-46	8	NOVA1	RGCs
FSD1	4.29e-206	0.618701	0.629	0.063	8.48e-202	8	FSD1	RGCs
SRGAP3	9.25e-63	0.616669	0.754	0.279	1.83e-58	8	SRGAP3	RGCs
MGARP1	2.77e-147	0.614028	0.566	0.071	5.47e-143	8	MGARP	RGCs
CORO2B	1.75e-275	0.613987	0.582	0.036	3.46e-271	8	CORO2B	RGCs
SSTR2	1.47e-156	0.613348	0.398	0.031	2.9e-152	8	SSTR2	RGCs
MARCKS	1.43e-50	0.613221	0.996	0.955	2.82e-46	8	MARCKS	RGCs
PRKAR2B	9.84e-130	0.613092	0.629	0.106	1.94e-125	8	PRKAR2B	RGCs
NRCAM	4.86e-209	0.61285	0.609	0.057	9.6e-205	8	NRCAM	RGCs
DCTN1	9.47e-75	0.607856	0.758	0.242	1.87e-70	8	DCTN1	RGCs
ENAH	1.58e-42	0.60757	0.883	0.515	3.13e-38	8	ENAH	RGCs
CELF5	2.72e-264	0.605416	0.559	0.034	5.37e-260	8	CELF5	RGCs
HACD3	1.04e-48	0.60326	0.859	0.436	2.05e-44	8	HACD3	RGCs
AP2M1	4.06e-39	0.603205	0.938	0.632	8.03e-35	8	AP2M1	RGCs
KIF3C	3.57e-156	0.60064	0.605	0.08	7.06e-152	8	KIF3C	RGCs
IGLON5	1.7e-138	0.600069	0.66	0.106	3.37e-134	8	IGLON5	RGCs
PRMT11	5.17e-44	0.599092	0.949	0.713	1.02e-39	8	PRMT1	RGCs
ACTB	3.18e-60	0.599086	1	0.981	6.28e-56	8	ACTB	RGCs
IGF1R	6.72e-70	0.598478	0.77	0.256	1.33e-65	8	IGF1R	RGCs
TMOD2	2.19e-184	0.598434	0.633	0.073	4.33e-180	8	TMOD2	RGCs
STXBP1	3.45e-109	0.598323	0.664	0.136	6.81e-105	8	STXBP1	RGCs
TSTD1	9.77e-95	0.59829	0.625	0.134	1.93e-90	8	TSTD1	RGCs
NCBP2	7.63e-55	0.598216	0.863	0.379	1.51e-50	8	NCBP2	RGCs
ARID1A	1.87e-45	0.596557	0.801	0.403	3.7e-41	8	ARID1A	RGCs
WASF1	5.25e-93	0.596131	0.695	0.174	1.04e-88	8	WASF1	RGCs
KLHL231	1.08e-75	0.596105	0.773	0.248	2.14e-71	8	KLHL23	RGCs
DHPS	5.18e-64	0.596044	0.789	0.304	1.02e-59	8	DHPS	RGCs
EIF1B	1.04e-47	0.595956	0.973	0.808	2.05e-43	8	EIF1B	RGCs
TXN	2.62e-37	0.595831	0.965	0.824	5.17e-33	8	TXN	RGCs
SV2A	1.95e-109	0.594431	0.559	0.096	3.86e-105	8	SV2A	RGCs
SMAD2	9e-53	0.594198	0.762	0.328	1.78e-48	8	SMAD2	RGCs
ARPC1A	5.82e-48	0.591721	0.824	0.422	1.15e-43	8	ARPC1A	RGCs
H1FX1	6.22e-42	0.591123	0.992	0.811	1.23e-37	8	H1FX	RGCs
SOX21	3.68e-34	0.59069	0.316	0.085	7.28e-30	8	SOX2	RGCs
TFAP2D	0	0.590536	0.348	0.005	0	8	TFAP2D	RGCs
OSBPL8	1.91e-46	0.589147	0.762	0.345	3.77e-42	8	OSBPL8	RGCs
NAP1L4	1.31e-45	0.589032	0.875	0.48	2.58e-41	8	NAP1L4	RGCs
CEND1	0	0.58903	0.547	0.014	0	8	CEND1	RGCs
FAM89B	1.59e-40	0.588023	0.867	0.478	3.14e-36	8	FAM89B	RGCs
AFDN	2.16e-84	0.587881	0.738	0.212	4.27e-80	8	AFDN	RGCs
PALM	5.68e-80	0.587838	0.727	0.205	1.12e-75	8	PALM	RGCs
DLX2	1.17e-259	0.586181	0.414	0.015	2.32e-255	8	DLX2	RGCs
FAM19A5	1.4e-93	0.58531	0.586	0.12	2.77e-89	8	FAM19A5	RGCs
FADS2	4.47e-90	0.584841	0.684	0.166	8.84e-86	8	FADS2	RGCs
RUNDC3A	0	0.584377	0.586	0.018	0	8	RUNDC3A	RGCs
AL139246.51	1.57e-41	0.584223	0.223	0.038	3.1e-37	8	AL139246.5	RGCs
POU3F1	1.34e-239	0.584024	0.484	0.027	2.64e-235	8	POU3F1	RGCs
SHF	2.09e-123	0.583741	0.625	0.106	4.13e-119	8	SHF	RGCs
CORO2A	0	0.583	0.531	0.008	0	8	CORO2A	RGCs
RAB2A	1.14e-37	0.582855	0.93	0.656	2.25e-33	8	RAB2A	RGCs
OPTN	1.48e-87	0.581302	0.652	0.156	2.92e-83	8	OPTN	RGCs
RAN1	2.53e-49	0.581119	0.988	0.855	5e-45	8	RAN	RGCs
STRBP	7.22e-84	0.580151	0.703	0.19	1.43e-79	8	STRBP	RGCs
NREP1	9.96e-37	0.578692	0.992	0.831	1.97e-32	8	NREP	RGCs
HDGFL3	5.59e-48	0.578663	0.863	0.464	1.11e-43	8	HDGFL3	RGCs
TKT1	5.21e-49	0.578593	0.91	0.521	1.03e-44	8	TKT	RGCs
SMARCD1	1.56e-67	0.578487	0.754	0.25	3.08e-63	8	SMARCD1	RGCs
DYNLL2	1.37e-68	0.57823	0.711	0.224	2.7e-64	8	DYNLL2	RGCs
TMSB4X1	3.05e-43	0.577921	1	0.986	6.04e-39	8	TMSB4X	RGCs
KDM5B	3.26e-44	0.576979	0.824	0.404	6.45e-40	8	KDM5B	RGCs
SNRPN	8.32e-37	0.576611	0.895	0.571	1.64e-32	8	SNRPN	RGCs
STRAP	3.5e-46	0.576532	0.945	0.635	6.92e-42	8	STRAP	RGCs
ODC11	7.45e-34	0.575448	0.898	0.547	1.47e-29	8	ODC1	RGCs
PAK5	4.11e-167	0.575071	0.598	0.072	8.13e-163	8	PAK5	RGCs
PAFAH1B1	1.18e-46	0.573461	0.82	0.377	2.33e-42	8	PAFAH1B1	RGCs
HIF1A	1.17e-41	0.573079	0.777	0.374	2.31e-37	8	HIF1A	RGCs
AFAP1	7.99e-58	0.571741	0.641	0.204	1.58e-53	8	AFAP1	RGCs
MTSS1	2.86e-154	0.571575	0.645	0.092	5.65e-150	8	MTSS1	RGCs
GNAQ	3.38e-64	0.570831	0.797	0.307	6.69e-60	8	GNAQ	RGCs
GNAI1	4.81e-73	0.570828	0.734	0.224	9.51e-69	8	GNAI1	RGCs
MXI1	3.5e-70	0.570683	0.742	0.24	6.92e-66	8	MXI1	RGCs
TOP2B	3.86e-41	0.570566	0.801	0.409	7.63e-37	8	TOP2B	RGCs
RERE	2.99e-47	0.569472	0.816	0.388	5.9e-43	8	RERE	RGCs
LCA51	3.26e-90	0.568962	0.578	0.118	6.45e-86	8	LCA5	RGCs
DCTN2	3.1e-35	0.564798	0.875	0.569	6.13e-31	8	DCTN2	RGCs
ACTR3	4.05e-46	0.564027	0.805	0.372	8e-42	8	ACTR3	RGCs
TULP4	2.35e-70	0.563472	0.727	0.22	4.64e-66	8	TULP4	RGCs
PLEKHA11	1.24e-45	0.561487	0.633	0.239	2.45e-41	8	PLEKHA1	RGCs
TOX2	1.74e-293	0.561221	0.551	0.027	3.44e-289	8	TOX2	RGCs
G3BP2	6.59e-42	0.56064	0.816	0.39	1.3e-37	8	G3BP2	RGCs
BEX4	1.78e-37	0.559932	0.941	0.699	3.53e-33	8	BEX4	RGCs
PWAR6	7.24e-113	0.55986	0.609	0.113	1.43e-108	8	PWAR6	RGCs
PCLO	1.01e-151	0.559426	0.574	0.073	2e-147	8	PCLO	RGCs
LYPLA1	2.92e-63	0.559277	0.77	0.283	5.76e-59	8	LYPLA1	RGCs
ABRACL	1.23e-134	0.558806	0.648	0.105	2.43e-130	8	ABRACL	RGCs
PHC2	4.34e-68	0.558728	0.734	0.24	8.57e-64	8	PHC2	RGCs
EIF4G2	1.87e-36	0.55869	0.969	0.79	3.7e-32	8	EIF4G2	RGCs
VEGFA	1.7e-50	0.558391	0.648	0.229	3.36e-46	8	VEGFA	RGCs
TAGLN2	1.17e-43	0.557558	0.668	0.265	2.31e-39	8	TAGLN2	RGCs
ACSL3	2.22e-50	0.557227	0.766	0.322	4.4e-46	8	ACSL3	RGCs
JPH4	0	0.557172	0.477	0.016	0	8	JPH4	RGCs
YTHDF2	1.11e-45	0.556697	0.773	0.362	2.19e-41	8	YTHDF2	RGCs
REC8	9.92e-128	0.55593	0.621	0.101	1.96e-123	8	REC8	RGCs
YPEL3	2.99e-56	0.555413	0.738	0.275	5.91e-52	8	YPEL3	RGCs
ISCA1	2.69e-59	0.554135	0.793	0.317	5.32e-55	8	ISCA1	RGCs
PHIP1	4.2e-37	0.552601	0.824	0.453	8.29e-33	8	PHIP	RGCs
LY6H	7.01e-56	0.552444	0.457	0.114	1.39e-51	8	LY6H	RGCs
SLITRK2	8.02e-272	0.552289	0.473	0.02	1.59e-267	8	SLITRK2	RGCs
CAPRIN1	5.33e-40	0.550757	0.828	0.434	1.05e-35	8	CAPRIN1	RGCs
SORBS2	4.44e-123	0.550501	0.594	0.096	8.78e-119	8	SORBS2	RGCs
DHCR7	3.2e-123	0.550373	0.59	0.094	6.33e-119	8	DHCR7	RGCs
SLC39A10	7.85e-42	0.549835	0.832	0.418	1.55e-37	8	SLC39A10	RGCs
DCAF7	4.93e-42	0.548793	0.801	0.399	9.75e-38	8	DCAF7	RGCs
NAV1	3.97e-59	0.547442	0.664	0.218	7.85e-55	8	NAV1	RGCs
CXXC4	8.44e-138	0.54697	0.59	0.086	1.67e-133	8	CXXC4	RGCs
CCDC88A	1.01e-32	0.546767	0.918	0.595	2e-28	8	CCDC88A	RGCs
NEAT1	2.42e-48	0.546635	0.77	0.352	4.78e-44	8	NEAT1	RGCs
AGTPBP1	1.35e-118	0.545985	0.629	0.111	2.68e-114	8	AGTPBP1	RGCs
UBA1	4.24e-49	0.545831	0.762	0.318	8.37e-45	8	UBA1	RGCs
PIN1	1.13e-41	0.545426	0.867	0.486	2.23e-37	8	PIN1	RGCs
TCEAL2	2.63e-52	0.545407	0.586	0.181	5.2e-48	8	TCEAL2	RGCs
JAKMIP2	1.83e-163	0.544485	0.625	0.08	3.62e-159	8	JAKMIP2	RGCs
HSPA8	1.63e-37	0.544213	0.992	0.872	3.21e-33	8	HSPA8	RGCs
NFASC	0	0.542332	0.516	0.011	0	8	NFASC	RGCs
PPM1G	7.57e-36	0.540903	0.875	0.53	1.5e-31	8	PPM1G	RGCs
CLIP3	3.5e-73	0.540133	0.68	0.195	6.92e-69	8	CLIP3	RGCs
ADCYAP1	0	0.539324	0.453	0.004	0	8	ADCYAP1	RGCs
TP53I11	1.16e-115	0.538954	0.59	0.101	2.29e-111	8	TP53I11	RGCs
FGF91	3.38e-146	0.538706	0.578	0.076	6.68e-142	8	FGF9	RGCs
ANKRD12	2.1e-41	0.538104	0.867	0.457	4.16e-37	8	ANKRD12	RGCs
AKT3	9.11e-72	0.537966	0.676	0.189	1.8e-67	8	AKT3	RGCs
NEUROD4	8.82e-101	0.53796	0.18	0.008	1.74e-96	8	NEUROD4	RGCs
PTBP2	1.65e-50	0.536303	0.789	0.319	3.26e-46	8	PTBP2	RGCs
DICER1	4.49e-41	0.535337	0.746	0.336	8.87e-37	8	DICER1	RGCs
NARF	1.4e-49	0.534941	0.719	0.283	2.77e-45	8	NARF	RGCs
C1orf43	3.12e-45	0.53436	0.797	0.372	6.16e-41	8	C1orf43	RGCs
ACTR1A	1.06e-60	0.533382	0.75	0.257	2.1e-56	8	ACTR1A	RGCs
MAPK8	2.44e-100	0.533084	0.668	0.146	4.83e-96	8	MAPK8	RGCs
TOMM20	1.21e-36	0.532713	0.941	0.714	2.4e-32	8	TOMM20	RGCs
TRAPPC1	7.41e-38	0.532646	0.875	0.533	1.46e-33	8	TRAPPC1	RGCs
ADGRG1	0	0.532034	0.551	0.02	0	8	ADGRG1	RGCs
CAMK4	1.66e-119	0.531958	0.625	0.108	3.28e-115	8	CAMK4	RGCs
FSD1L	7e-195	0.53118	0.617	0.064	1.38e-190	8	FSD1L	RGCs
YAF2	3.23e-63	0.531167	0.754	0.259	6.38e-59	8	YAF2	RGCs
ATP6V0A1	9.39e-95	0.530937	0.648	0.142	1.86e-90	8	ATP6V0A1	RGCs
NOL4	0	0.530781	0.5	0.016	0	8	NOL4	RGCs
XKR4	1.03e-307	0.530546	0.527	0.022	2.03e-303	8	XKR4	RGCs
ESRRG	4.09e-217	0.530539	0.523	0.038	8.09e-213	8	ESRRG	RGCs
CCDC167	1.69e-42	0.530082	0.812	0.416	3.33e-38	8	CCDC167	RGCs
RIMS3	4.86e-283	0.530062	0.52	0.025	9.61e-279	8	RIMS3	RGCs
DDT	1.01e-28	0.528842	0.891	0.644	2e-24	8	DDT	RGCs
PRDX5	2.02e-29	0.528127	0.973	0.829	3.98e-25	8	PRDX5	RGCs
NBEA	2.51e-63	0.527688	0.656	0.199	4.97e-59	8	NBEA	RGCs
PAFAH1B2	9.28e-56	0.527236	0.773	0.305	1.83e-51	8	PAFAH1B2	RGCs
DDR1	6.45e-116	0.527007	0.609	0.106	1.27e-111	8	DDR1	RGCs
PPM1B	1.55e-91	0.526597	0.668	0.156	3.07e-87	8	PPM1B	RGCs
HMGB31	5.03e-52	0.526057	0.848	0.386	9.95e-48	8	HMGB3	RGCs
AGAP1	3.92e-96	0.525905	0.613	0.127	7.74e-92	8	AGAP1	RGCs
TAC1	3.03e-133	0.525745	0.395	0.037	5.99e-129	8	TAC1	RGCs
KPNB1	7.57e-39	0.525292	0.848	0.468	1.5e-34	8	KPNB1	RGCs
KMT2A	9.32e-35	0.524992	0.832	0.502	1.84e-30	8	KMT2A	RGCs
ATAT1	1.04e-89	0.524761	0.707	0.177	2.06e-85	8	ATAT1	RGCs
NOL4L	1.06e-114	0.524446	0.609	0.109	2.09e-110	8	NOL4L	RGCs
PRUNE2	8.5e-248	0.524261	0.457	0.022	1.68e-243	8	PRUNE2	RGCs
RASSF4	1.41e-133	0.523907	0.527	0.069	2.79e-129	8	RASSF4	RGCs
TSPYL4	4.91e-49	0.523704	0.711	0.27	9.7e-45	8	TSPYL4	RGCs
HMGA11	1.65e-46	0.523449	0.773	0.32	3.25e-42	8	HMGA1	RGCs
FKBP4	3.09e-55	0.523176	0.789	0.31	6.11e-51	8	FKBP4	RGCs
REEP2	5.85e-207	0.522843	0.566	0.05	1.16e-202	8	REEP2	RGCs
RDH11	3.21e-55	0.522076	0.746	0.271	6.34e-51	8	RDH11	RGCs
KDM6B	3.48e-64	0.522061	0.641	0.198	6.88e-60	8	KDM6B	RGCs
ACTG1	2.51e-57	0.521383	1	0.992	4.96e-53	8	ACTG1	RGCs
KMT2C	2.26e-41	0.520998	0.734	0.345	4.47e-37	8	KMT2C	RGCs
LIMD2	1.27e-65	0.520179	0.688	0.208	2.51e-61	8	LIMD2	RGCs
NTRK1	0	0.51975	0.473	0.013	0	8	NTRK1	RGCs
SLIRP	9.3e-37	0.518094	0.945	0.715	1.84e-32	8	SLIRP	RGCs
ATP5PO	8.24e-37	0.517061	0.977	0.85	1.63e-32	8	ATP5PO	RGCs
CAMSAP1	2.7e-84	0.516488	0.621	0.142	5.33e-80	8	CAMSAP1	RGCs
CACNB3	1.72e-147	0.515283	0.602	0.082	3.4e-143	8	CACNB3	RGCs
UBE2D1	7.69e-63	0.51481	0.711	0.228	1.52e-58	8	UBE2D1	RGCs
ACTL6B	0	0.513549	0.516	0.006	0	8	ACTL6B	RGCs
GRIA4	7.27e-205	0.513001	0.523	0.04	1.44e-200	8	GRIA4	RGCs
MEX3A	1.12e-34	0.512016	0.809	0.459	2.22e-30	8	MEX3A	RGCs
LNPK	2.25e-70	0.511911	0.746	0.229	4.45e-66	8	LNPK	RGCs
STON21	1.33e-191	0.510742	0.559	0.051	2.62e-187	8	STON2	RGCs
CCT8	2.35e-33	0.510592	0.914	0.679	4.64e-29	8	CCT8	RGCs
MAZ1	4.06e-39	0.510308	0.891	0.525	8.02e-35	8	MAZ	RGCs
H2AFY2	1.08e-41	0.509047	0.812	0.4	2.14e-37	8	H2AFY2	RGCs
VKORC1	2.36e-34	0.508145	0.902	0.541	4.67e-30	8	VKORC1	RGCs
TXNDC17	1.15e-40	0.50789	0.887	0.478	2.28e-36	8	TXNDC17	RGCs
FKBP31	4.62e-30	0.507312	0.906	0.634	9.14e-26	8	FKBP3	RGCs
NIPSNAP1	1.49e-49	0.506512	0.793	0.324	2.95e-45	8	NIPSNAP1	RGCs
SCN3A	0	0.506027	0.508	0.012	0	8	SCN3A	RGCs
TMEM169	0	0.505877	0.559	0.026	0	8	TMEM169	RGCs
SYT5	0	0.505694	0.48	0.01	0	8	SYT5	RGCs
TENM3	4.85e-30	0.505668	0.625	0.28	9.59e-26	8	TENM3	RGCs
SLC39A6	2.02e-73	0.505453	0.703	0.202	4e-69	8	SLC39A6	RGCs
RXRG	4.64e-213	0.504803	0.469	0.03	9.18e-209	8	RXRG	RGCs
SLC4A8	2.6e-262	0.504162	0.562	0.034	5.15e-258	8	SLC4A8	RGCs
PPP2R5E	1.01e-45	0.50311	0.742	0.325	1.99e-41	8	PPP2R5E	RGCs
ZCCHC17	2.74e-51	0.502812	0.801	0.322	5.42e-47	8	ZCCHC17	RGCs
MMD	1.07e-110	0.502126	0.668	0.131	2.12e-106	8	MMD	RGCs
TTLL7	2.21e-60	0.502101	0.664	0.206	4.38e-56	8	TTLL7	RGCs
MSANTD4	2.07e-61	0.501006	0.621	0.182	4.1e-57	8	MSANTD4	RGCs
THSD7A	4.22e-41	0.500858	0.629	0.236	8.34e-37	8	THSD7A	RGCs
PTPRG	3.09e-59	0.500744	0.703	0.235	6.1e-55	8	PTPRG	RGCs
KHDRBS3	2.06e-63	0.500228	0.648	0.189	4.07e-59	8	KHDRBS3	RGCs
TOP2A2	1.06e-199	3.52847	0.989	0.19	2.09e-195	9	TOP2A	proliferating cells
CENPF2	1.34e-202	3.22088	0.971	0.169	2.64e-198	9	CENPF	proliferating cells
HIST1H4C2	5.9e-61	3.14232	0.88	0.624	1.17e-56	9	HIST1H4C	proliferating cells
UBE2C2	1.15e-237	3.14077	1	0.146	2.27e-233	9	UBE2C	proliferating cells
NUSAP12	4.87e-246	3.03987	0.971	0.132	9.63e-242	9	NUSAP1	proliferating cells
HMGB22	3.45e-105	2.8159	0.994	0.632	6.83e-101	9	HMGB2	proliferating cells
PTTG12	5.37e-162	2.78749	0.977	0.228	1.06e-157	9	PTTG1	proliferating cells
CDK12	3.12e-241	2.59675	0.966	0.13	6.17e-237	9	CDK1	proliferating cells
CKS21	1.31e-122	2.50338	0.983	0.34	2.59e-118	9	CKS2	proliferating cells
KPNA21	1.64e-129	2.41174	0.937	0.248	3.24e-125	9	KPNA2	proliferating cells
TUBA1B2	9.79e-105	2.38223	1	0.918	1.93e-100	9	TUBA1B	proliferating cells
TPX21	8.26e-251	2.38064	0.92	0.106	1.63e-246	9	TPX2	proliferating cells
TUBB4B1	8.28e-95	2.37591	0.96	0.509	1.64e-90	9	TUBB4B	proliferating cells
MKI671	0	2.35395	0.92	0.077	0	9	MKI67	proliferating cells
ARL6IP12	2.32e-86	2.28377	0.937	0.433	4.58e-82	9	ARL6IP1	proliferating cells
ASPM	1.06e-284	2.25434	0.92	0.087	2.09e-280	9	ASPM	proliferating cells
CCNB11	4.94e-208	2.23747	0.863	0.109	9.76e-204	9	CCNB1	proliferating cells
TUBA1C	3.63e-94	2.20133	0.886	0.313	7.17e-90	9	TUBA1C	proliferating cells
DLGAP51	0	2.1301	0.914	0.071	0	9	DLGAP5	proliferating cells
UBE2S1	1.11e-96	2.11642	0.977	0.512	2.2e-92	9	UBE2S	proliferating cells
SMC42	2.55e-156	2.06756	0.931	0.208	5.03e-152	9	SMC4	proliferating cells
BIRC51	4.85e-269	2.06031	0.966	0.106	9.58e-265	9	BIRC5	proliferating cells
H2AFZ2	4.81e-91	2.05932	0.989	0.826	9.51e-87	9	H2AFZ	proliferating cells
MAD2L12	2.8e-194	1.99871	0.954	0.161	5.53e-190	9	MAD2L1	proliferating cells
CKAP21	7.23e-204	1.95461	0.937	0.141	1.43e-199	9	CKAP2	proliferating cells
CCNB21	9.2e-194	1.95337	0.88	0.122	1.82e-189	9	CCNB2	proliferating cells
HMGN22	6.64e-100	1.9441	1	0.913	1.31e-95	9	HMGN2	proliferating cells
H2AFX1	2.87e-139	1.9074	0.937	0.236	5.68e-135	9	H2AFX	proliferating cells
CENPE	4.93e-267	1.88154	0.829	0.072	9.74e-263	9	CENPE	proliferating cells
CDC201	4.65e-259	1.86962	0.777	0.061	9.18e-255	9	CDC20	proliferating cells
CKS1B2	3.6e-97	1.86849	0.96	0.429	7.11e-93	9	CKS1B	proliferating cells
AURKB1	3.84e-289	1.78769	0.92	0.083	7.6e-285	9	AURKB	proliferating cells
CDKN31	5.14e-252	1.72625	0.886	0.089	1.02e-247	9	CDKN3	proliferating cells
GTSE11	0	1.71456	0.874	0.058	0	9	GTSE1	proliferating cells
KIF11	4.26e-279	1.71269	0.891	0.083	8.43e-275	9	KIF11	proliferating cells
CCNA21	6.85e-281	1.69192	0.88	0.077	1.35e-276	9	CCNA2	proliferating cells
KIF20B	2.01e-170	1.68825	0.863	0.143	3.97e-166	9	KIF20B	proliferating cells
CENPW1	1.72e-145	1.68702	0.914	0.205	3.4e-141	9	CENPW	proliferating cells
PCLAF2	1.13e-109	1.68673	0.909	0.236	2.22e-105	9	PCLAF	proliferating cells
PBK1	2.77e-244	1.66257	0.84	0.082	5.47e-240	9	PBK	proliferating cells
MXD3	0	1.65638	0.88	0.066	0	9	MXD3	proliferating cells
HMGB12	3.95e-97	1.59178	1	0.965	7.81e-93	9	HMGB1	proliferating cells
PRC1	1.22e-303	1.58237	0.874	0.07	2.4e-299	9	PRC1	proliferating cells
CENPA1	0	1.57518	0.754	0.041	0	9	CENPA	proliferating cells
UBE2T2	6.27e-156	1.57435	0.863	0.152	1.24e-151	9	UBE2T	proliferating cells
SGO2	6.51e-277	1.56859	0.84	0.07	1.29e-272	9	SGO2	proliferating cells
NDC80	0	1.56673	0.886	0.06	0	9	NDC80	proliferating cells
CDCA31	4.05e-300	1.52436	0.817	0.057	8e-296	9	CDCA3	proliferating cells
TMPO2	1.26e-84	1.48416	0.949	0.49	2.5e-80	9	TMPO	proliferating cells
TYMS2	3.05e-101	1.48249	0.817	0.19	6.04e-97	9	TYMS	proliferating cells
NUCKS11	2.91e-91	1.47905	1	0.89	5.75e-87	9	NUCKS1	proliferating cells
KIF20A	0	1.4501	0.777	0.035	0	9	KIF20A	proliferating cells
NUF21	0	1.433	0.834	0.058	0	9	NUF2	proliferating cells
HMMR	1.18e-266	1.43064	0.714	0.048	2.34e-262	9	HMMR	proliferating cells
FBXO51	2.63e-161	1.42849	0.8	0.122	5.19e-157	9	FBXO5	proliferating cells
H2AFV2	6.98e-80	1.42424	0.96	0.613	1.38e-75	9	H2AFV	proliferating cells
SPC251	3.68e-253	1.41889	0.8	0.069	7.27e-249	9	SPC25	proliferating cells
KNL1	1.54e-284	1.41619	0.811	0.061	3.04e-280	9	KNL1	proliferating cells
JPT11	3.39e-55	1.37144	0.989	0.648	6.71e-51	9	JPT1	proliferating cells
ZWINT2	1.59e-207	1.36168	0.857	0.101	3.14e-203	9	ZWINT	proliferating cells
MIS18BP11	4.99e-129	1.34093	0.903	0.204	9.87e-125	9	MIS18BP1	proliferating cells
KIF2C	0	1.34073	0.84	0.054	0	9	KIF2C	proliferating cells
RRM21	3.53e-185	1.33354	0.737	0.08	6.98e-181	9	RRM2	proliferating cells
SMC21	1.75e-102	1.33249	0.869	0.249	3.46e-98	9	SMC2	proliferating cells
HIST1H1D2	1.25e-44	1.3126	0.623	0.213	2.46e-40	9	HIST1H1D	proliferating cells
KIF23	1.9e-301	1.31031	0.8	0.054	3.76e-297	9	KIF23	proliferating cells
RACGAP1	2.37e-263	1.30402	0.794	0.064	4.69e-259	9	RACGAP1	proliferating cells
DEPDC1	0	1.30117	0.754	0.042	0	9	DEPDC1	proliferating cells
NEK21	2.25e-263	1.2987	0.686	0.044	4.46e-259	9	NEK2	proliferating cells
RAD211	5.67e-65	1.29294	0.949	0.54	1.12e-60	9	RAD21	proliferating cells
AURKA	2.75e-256	1.28784	0.737	0.054	5.44e-252	9	AURKA	proliferating cells
TACC3	5.22e-279	1.28696	0.794	0.059	1.03e-274	9	TACC3	proliferating cells
MZT11	2.58e-85	1.28546	0.88	0.301	5.1e-81	9	MZT1	proliferating cells
ANP32E1	1.66e-76	1.28536	0.96	0.486	3.27e-72	9	ANP32E	proliferating cells
PIMREG1	1.72e-240	1.27948	0.714	0.055	3.39e-236	9	PIMREG	proliferating cells
PLK1	5.51e-307	1.27936	0.703	0.037	1.09e-302	9	PLK1	proliferating cells
BUB31	2.81e-76	1.27894	0.903	0.352	5.55e-72	9	BUB3	proliferating cells
HMGB32	9.09e-65	1.27314	0.886	0.392	1.8e-60	9	HMGB3	proliferating cells
KIF221	2.92e-140	1.26314	0.84	0.155	5.77e-136	9	KIF22	proliferating cells
TUBB2	1.04e-78	1.25792	0.994	0.962	2.05e-74	9	TUBB	proliferating cells
ECT21	8.53e-242	1.22639	0.789	0.07	1.69e-237	9	ECT2	proliferating cells
TROAP	6.53e-222	1.20991	0.634	0.046	1.29e-217	9	TROAP	proliferating cells
HIST1H1A1	5.39e-139	1.16722	0.617	0.075	1.06e-134	9	HIST1H1A	proliferating cells
DTYMK1	3e-88	1.16158	0.897	0.302	5.93e-84	9	DTYMK	proliferating cells
RHEB	5.09e-68	1.16107	0.966	0.646	1.01e-63	9	RHEB	proliferating cells
CENPK1	6.26e-171	1.15937	0.84	0.12	1.24e-166	9	CENPK	proliferating cells
DIAPH3	1.88e-254	1.14221	0.754	0.058	3.72e-250	9	DIAPH3	proliferating cells
STMN12	4.73e-71	1.13918	1	0.965	9.35e-67	9	STMN1	proliferating cells
CKAP5	2.49e-74	1.12131	0.8	0.253	4.91e-70	9	CKAP5	proliferating cells
TUBB6	1.63e-102	1.12025	0.817	0.196	3.23e-98	9	TUBB6	proliferating cells
CDCA4	1.94e-90	1.11889	0.771	0.196	3.83e-86	9	CDCA4	proliferating cells
KNSTRN1	3.91e-128	1.10339	0.68	0.103	7.72e-124	9	KNSTRN	proliferating cells
DEK2	2.59e-53	1.10321	0.943	0.691	5.12e-49	9	DEK	proliferating cells
ANLN	7.46e-266	1.09634	0.731	0.051	1.47e-261	9	ANLN	proliferating cells
KIF4A	1.04e-270	1.09516	0.72	0.048	2.06e-266	9	KIF4A	proliferating cells
TTK	2.6e-262	1.0933	0.691	0.045	5.15e-258	9	TTK	proliferating cells
SKA21	6.81e-57	1.08201	0.92	0.456	1.35e-52	9	SKA2	proliferating cells
KIFC1	1.26e-282	1.07628	0.777	0.054	2.5e-278	9	KIFC1	proliferating cells
CDCA8	3.29e-248	1.07197	0.657	0.042	6.5e-244	9	CDCA8	proliferating cells
PTN2	7.83e-45	1.07181	0.943	0.656	1.55e-40	9	PTN	proliferating cells
PSRC1	8.49e-218	1.06481	0.68	0.054	1.68e-213	9	PSRC1	proliferating cells
SGO1	3.7e-239	1.06006	0.709	0.054	7.3e-235	9	SGO1	proliferating cells
CMC2	5.11e-73	1.05633	0.874	0.333	1.01e-68	9	CMC2	proliferating cells
SPDL1	5.43e-122	1.05556	0.771	0.139	1.07e-117	9	SPDL1	proliferating cells
KIF14	4.83e-282	1.05382	0.646	0.034	9.54e-278	9	KIF14	proliferating cells
BUB1B	2.22e-272	1.05224	0.714	0.046	4.39e-268	9	BUB1B	proliferating cells
CKAP2L	2.45e-305	1.04069	0.714	0.039	4.84e-301	9	CKAP2L	proliferating cells
HJURP	1.96e-270	1.04062	0.691	0.042	3.87e-266	9	HJURP	proliferating cells
ARHGAP11A	5.72e-214	1.03833	0.651	0.051	1.13e-209	9	ARHGAP11A	proliferating cells
KIF15	2.14e-218	1.03331	0.669	0.053	4.23e-214	9	KIF15	proliferating cells
LGALS13	4.72e-36	1.0249	1	0.936	9.33e-32	9	LGALS1	proliferating cells
HP1BP3	1.64e-47	1.01424	0.949	0.701	3.24e-43	9	HP1BP3	proliferating cells
RAD51AP1	2.53e-174	1.01345	0.726	0.082	5e-170	9	RAD51AP1	proliferating cells
CCDC341	6.01e-55	1.00417	0.857	0.393	1.19e-50	9	CCDC34	proliferating cells
KIF18A	1.59e-177	0.989634	0.634	0.061	3.14e-173	9	KIF18A	proliferating cells
TMSB15A3	3.59e-45	0.989174	0.92	0.524	7.09e-41	9	TMSB15A	proliferating cells
LMNB2	5.42e-103	0.980844	0.789	0.176	1.07e-98	9	LMNB2	proliferating cells
H1FX2	5.22e-47	0.980424	0.971	0.815	1.03e-42	9	H1FX	proliferating cells
CALM22	8.48e-60	0.972959	1	0.943	1.68e-55	9	CALM2	proliferating cells
NCAPD2	1e-172	0.962193	0.749	0.09	1.98e-168	9	NCAPD2	proliferating cells
FAM83D	1.52e-260	0.955284	0.583	0.029	3e-256	9	FAM83D	proliferating cells
SYNE21	4.31e-55	0.941412	0.8	0.303	8.52e-51	9	SYNE2	proliferating cells
CENPN	1.09e-156	0.937966	0.726	0.092	2.15e-152	9	CENPN	proliferating cells
ATAD21	1.76e-87	0.934375	0.663	0.137	3.48e-83	9	ATAD2	proliferating cells
NCAPG	3.94e-209	0.933227	0.697	0.061	7.78e-205	9	NCAPG	proliferating cells
GGH	9.39e-92	0.932965	0.743	0.172	1.86e-87	9	GGH	proliferating cells
EZH21	7.61e-76	0.930819	0.794	0.227	1.5e-71	9	EZH2	proliferating cells
HNRNPA2B11	1.45e-60	0.925855	0.977	0.937	2.87e-56	9	HNRNPA2B1	proliferating cells
SPC24	1.92e-250	0.923322	0.72	0.052	3.8e-246	9	SPC24	proliferating cells
ESCO2	2.74e-179	0.920076	0.606	0.052	5.41e-175	9	ESCO2	proliferating cells
GPSM2	4.6e-66	0.91305	0.669	0.178	9.08e-62	9	GPSM2	proliferating cells
CENPU2	2.99e-144	0.912178	0.789	0.117	5.91e-140	9	CENPU	proliferating cells
MND11	1.25e-126	0.91016	0.691	0.103	2.47e-122	9	MND1	proliferating cells
HSP90B1	1.23e-37	0.90292	0.966	0.85	2.44e-33	9	HSP90B1	proliferating cells
MELK	4.8e-266	0.900901	0.697	0.045	9.48e-262	9	MELK	proliferating cells
G2E3	2.91e-57	0.89468	0.686	0.218	5.74e-53	9	G2E3	proliferating cells
NMU	1.7e-135	0.877448	0.394	0.028	3.35e-131	9	NMU	proliferating cells
CDCA2	7.11e-270	0.875941	0.594	0.029	1.4e-265	9	CDCA2	proliferating cells
DBF4	3.64e-87	0.873496	0.663	0.136	7.2e-83	9	DBF4	proliferating cells
LMNB11	7.55e-90	0.861651	0.777	0.185	1.49e-85	9	LMNB1	proliferating cells
UBALD2	8.15e-67	0.855625	0.714	0.197	1.61e-62	9	UBALD2	proliferating cells
BUB1	3.1e-227	0.854716	0.611	0.04	6.13e-223	9	BUB1	proliferating cells
PTMS1	1.22e-28	0.852103	0.994	0.906	2.4e-24	9	PTMS	proliferating cells
HIST1H2AH	2.15e-110	0.851937	0.509	0.061	4.25e-106	9	HIST1H2AH	proliferating cells
IQGAP3	2.4e-280	0.846158	0.56	0.023	4.74e-276	9	IQGAP3	proliferating cells
FOXM1	3.52e-189	0.842544	0.64	0.056	6.96e-185	9	FOXM1	proliferating cells
LSM5	1.7e-38	0.83705	0.96	0.709	3.36e-34	9	LSM5	proliferating cells
HIST2H2AC	6.16e-49	0.836075	0.571	0.163	1.22e-44	9	HIST2H2AC	proliferating cells
PRR11	2.57e-197	0.834745	0.6	0.046	5.08e-193	9	PRR11	proliferating cells
HIST1H1C1	2.38e-46	0.830169	0.64	0.212	4.7e-42	9	HIST1H1C	proliferating cells
KIF5B	9.05e-33	0.823142	0.874	0.572	1.79e-28	9	KIF5B	proliferating cells
C21orf58	1.19e-137	0.822521	0.623	0.075	2.35e-133	9	C21orf58	proliferating cells
RTKN21	1.18e-120	0.814256	0.629	0.088	2.32e-116	9	RTKN2	proliferating cells
WEE1	3.4e-70	0.81063	0.731	0.197	6.71e-66	9	WEE1	proliferating cells
EMC9	8.75e-85	0.807521	0.686	0.151	1.73e-80	9	EMC9	proliferating cells
USP1	4.52e-47	0.801951	0.771	0.312	8.94e-43	9	USP1	proliferating cells
CALM31	4.04e-36	0.794323	0.954	0.73	7.97e-32	9	CALM3	proliferating cells
SAP30	6.63e-47	0.788372	0.731	0.282	1.31e-42	9	SAP30	proliferating cells
CDK5RAP2	6.78e-71	0.788171	0.703	0.186	1.34e-66	9	CDK5RAP2	proliferating cells
GAS2L3	8.67e-153	0.781769	0.503	0.042	1.71e-148	9	GAS2L3	proliferating cells
RAN2	1.64e-39	0.779201	0.977	0.857	3.25e-35	9	RAN	proliferating cells
TK12	4.5e-149	0.776888	0.68	0.08	8.89e-145	9	TK1	proliferating cells
GMNN2	5.61e-61	0.776655	0.674	0.186	1.11e-56	9	GMNN	proliferating cells
NCAPH	1.86e-216	0.77257	0.594	0.04	3.67e-212	9	NCAPH	proliferating cells
NDE1	3.63e-117	0.771071	0.606	0.084	7.17e-113	9	NDE1	proliferating cells
CIP2A	3.22e-153	0.757904	0.634	0.069	6.36e-149	9	CIP2A	proliferating cells
PHF19	5.87e-99	0.752197	0.691	0.13	1.16e-94	9	PHF19	proliferating cells
GLRX5	3.18e-26	0.749518	0.914	0.596	6.29e-22	9	GLRX5	proliferating cells
HIST1H1B1	2.14e-109	0.747665	0.48	0.054	4.23e-105	9	HIST1H1B	proliferating cells
ANP32B	8.46e-37	0.746239	0.949	0.8	1.67e-32	9	ANP32B	proliferating cells
TPM4	6.96e-29	0.745491	0.909	0.673	1.38e-24	9	TPM4	proliferating cells
MRPL51	2.21e-31	0.741575	0.96	0.787	4.37e-27	9	MRPL51	proliferating cells
RRM12	7.18e-60	0.740842	0.72	0.215	1.42e-55	9	RRM1	proliferating cells
TRIM59	6.06e-115	0.728995	0.6	0.083	1.2e-110	9	TRIM59	proliferating cells
HMGN1	2.81e-44	0.728904	0.983	0.92	5.55e-40	9	HMGN1	proliferating cells
IKBIP	2.73e-43	0.725365	0.686	0.255	5.39e-39	9	IKBIP	proliferating cells
CEP55	1.89e-232	0.725364	0.52	0.026	3.74e-228	9	CEP55	proliferating cells
RBMX	7.3e-27	0.724437	0.96	0.811	1.44e-22	9	RBMX	proliferating cells
PIF1	4.83e-163	0.722961	0.394	0.022	9.55e-159	9	PIF1	proliferating cells
DCTN31	1.64e-25	0.721727	0.903	0.657	3.23e-21	9	DCTN3	proliferating cells
LSM42	1.93e-32	0.71941	0.886	0.556	3.81e-28	9	LSM4	proliferating cells
KMT5A	9.07e-53	0.717312	0.674	0.211	1.79e-48	9	KMT5A	proliferating cells
SAE1	9.27e-52	0.71689	0.731	0.246	1.83e-47	9	SAE1	proliferating cells
CENPM1	9.44e-104	0.713954	0.583	0.085	1.87e-99	9	CENPM	proliferating cells
SFPQ	1.11e-25	0.713248	0.954	0.737	2.19e-21	9	SFPQ	proliferating cells
BRD8	2.18e-31	0.708504	0.72	0.346	4.31e-27	9	BRD8	proliferating cells
SHCBP1	1.24e-255	0.707168	0.6	0.032	2.44e-251	9	SHCBP1	proliferating cells
BTG3	2.25e-24	0.706409	0.829	0.514	4.44e-20	9	BTG3	proliferating cells
CRNDE	6.63e-34	0.705743	0.834	0.421	1.31e-29	9	CRNDE	proliferating cells
CTGF3	8.95e-07	0.703486	0.634	0.463	0.0176892	9	CTGF	proliferating cells
PSIP11	2.31e-27	0.699215	0.874	0.619	4.57e-23	9	PSIP1	proliferating cells
NUDT11	3.65e-44	0.694983	0.731	0.277	7.21e-40	9	NUDT1	proliferating cells
CENPH2	7.76e-70	0.690908	0.629	0.14	1.53e-65	9	CENPH	proliferating cells
DUT2	1.33e-21	0.68977	0.891	0.628	2.63e-17	9	DUT	proliferating cells
CBX5	9.58e-29	0.684318	0.891	0.701	1.89e-24	9	CBX5	proliferating cells
CCNF	8.24e-145	0.684227	0.509	0.046	1.63e-140	9	CCNF	proliferating cells
HMGN3	2.88e-21	0.680217	0.954	0.807	5.69e-17	9	HMGN3	proliferating cells
RANGAP1	3.02e-76	0.679897	0.554	0.107	5.96e-72	9	RANGAP1	proliferating cells
SMC3	5.68e-29	0.679508	0.869	0.562	1.12e-24	9	SMC3	proliferating cells
CDC25C	2.03e-205	0.675952	0.537	0.033	4.01e-201	9	CDC25C	proliferating cells
APOLD1	1.24e-178	0.675388	0.537	0.039	2.46e-174	9	APOLD1	proliferating cells
TMEM106C1	3.68e-29	0.673052	0.691	0.315	7.27e-25	9	TMEM106C	proliferating cells
POC1A	3.63e-174	0.658025	0.566	0.046	7.17e-170	9	POC1A	proliferating cells
MNS1	4.69e-64	0.64742	0.64	0.152	9.26e-60	9	MNS1	proliferating cells
CYP1B13	8.32e-13	0.643834	0.691	0.432	1.64e-08	9	CYP1B1	proliferating cells
NSD2	6.5e-50	0.643376	0.64	0.192	1.28e-45	9	NSD2	proliferating cells
CBX3	2.29e-30	0.638802	0.96	0.806	4.52e-26	9	CBX3	proliferating cells
MZT2B	3.72e-34	0.637685	0.971	0.906	7.35e-30	9	MZT2B	proliferating cells
COX8A	2.64e-37	0.636608	0.977	0.835	5.21e-33	9	COX8A	proliferating cells
SPAG5	4.23e-188	0.629827	0.537	0.037	8.36e-184	9	SPAG5	proliferating cells
LSM8	1.25e-21	0.621963	0.851	0.554	2.46e-17	9	LSM8	proliferating cells
CBX1	4.25e-25	0.620349	0.914	0.688	8.4e-21	9	CBX1	proliferating cells
ILF2	2.48e-23	0.619507	0.914	0.693	4.89e-19	9	ILF2	proliferating cells
ANAPC11	1.02e-27	0.614782	0.92	0.771	2.01e-23	9	ANAPC11	proliferating cells
UBB	1.55e-36	0.614557	0.989	0.96	3.06e-32	9	UBB	proliferating cells
SUN2	7.19e-86	0.613003	0.486	0.072	1.42e-81	9	SUN2	proliferating cells
REEP4	1.13e-86	0.610439	0.371	0.04	2.24e-82	9	REEP4	proliferating cells
TWIST11	1.9e-10	0.609357	0.829	0.576	3.75e-06	9	TWIST1	proliferating cells
AKAP122	1.8e-08	0.60887	0.811	0.622	0.000355613	9	AKAP12	proliferating cells
HNRNPA0	4.13e-23	0.608819	0.954	0.785	8.16e-19	9	HNRNPA0	proliferating cells
PTGES3	1.94e-29	0.607772	0.949	0.816	3.84e-25	9	PTGES3	proliferating cells
2007-09-01	5.16e-27	0.606	0.96	0.885	1.02e-22	9	2007-09-01	proliferating cells
CDCA5	5.27e-160	0.605725	0.583	0.054	1.04e-155	9	CDCA5	proliferating cells
LBR	7.19e-29	0.604668	0.703	0.313	1.42e-24	9	LBR	proliferating cells
RPA32	8.84e-36	0.602781	0.783	0.341	1.75e-31	9	RPA3	proliferating cells
KIF18B	2.63e-257	0.599508	0.537	0.024	5.2e-253	9	KIF18B	proliferating cells
CCL21	0.00040626	0.598893	0.229	0.134	1	9	CCL2	proliferating cells
PSME2	1.1e-25	0.593995	0.714	0.341	2.17e-21	9	PSME2	proliferating cells
CIT	9.28e-87	0.593805	0.549	0.088	1.83e-82	9	CIT	proliferating cells
PNRC2	1.4e-25	0.593045	0.811	0.482	2.77e-21	9	PNRC2	proliferating cells
CNIH4	8.39e-27	0.592836	0.731	0.362	1.66e-22	9	CNIH4	proliferating cells
ARPC51	5.59e-21	0.589941	0.857	0.589	1.1e-16	9	ARPC5	proliferating cells
SCLT1	2.65e-35	0.589923	0.526	0.172	5.24e-31	9	SCLT1	proliferating cells
PARPBP	1.48e-107	0.58891	0.514	0.064	2.92e-103	9	PARPBP	proliferating cells
BCL7C	4.46e-22	0.588484	0.891	0.563	8.81e-18	9	BCL7C	proliferating cells
DYNLL1	2.22e-28	0.588415	0.989	0.955	4.39e-24	9	DYNLL1	proliferating cells
RARRES21	4.18e-24	0.584881	0.657	0.309	8.26e-20	9	RARRES2	proliferating cells
CENPL	6.18e-113	0.582346	0.537	0.067	1.22e-108	9	CENPL	proliferating cells
CEP70	4.09e-46	0.579106	0.589	0.169	8.08e-42	9	CEP70	proliferating cells
ORC61	3.98e-95	0.577595	0.623	0.103	7.86e-91	9	ORC6	proliferating cells
SUPT16H	9.41e-21	0.574381	0.84	0.553	1.86e-16	9	SUPT16H	proliferating cells
RHNO1	5.29e-50	0.574042	0.566	0.15	1.04e-45	9	RHNO1	proliferating cells
SRSF31	8.23e-24	0.574026	0.977	0.886	1.63e-19	9	SRSF3	proliferating cells
HNRNPR	6.76e-27	0.570124	0.937	0.756	1.34e-22	9	HNRNPR	proliferating cells
CCDC88A1	1.58e-18	0.569204	0.857	0.602	3.12e-14	9	CCDC88A	proliferating cells
SAC3D1	2.27e-47	0.567022	0.589	0.166	4.49e-43	9	SAC3D1	proliferating cells
C12orf75	1.48e-18	0.565233	0.697	0.368	2.92e-14	9	C12orf75	proliferating cells
RANBP12	1.54e-20	0.56132	0.914	0.732	3.03e-16	9	RANBP1	proliferating cells
RAB8A	1.64e-27	0.559109	0.754	0.35	3.25e-23	9	RAB8A	proliferating cells
SKA3	3.34e-159	0.558551	0.497	0.038	6.61e-155	9	SKA3	proliferating cells
CTCF	5.71e-25	0.557639	0.731	0.362	1.13e-20	9	CTCF	proliferating cells
2010-09-01	6.28e-31	0.557484	0.72	0.329	1.24e-26	9	2010-09-01	proliferating cells
SNRPG1	2.64e-28	0.554928	0.954	0.751	5.21e-24	9	SNRPG	proliferating cells
CEP152	1.34e-125	0.553624	0.514	0.054	2.65e-121	9	CEP152	proliferating cells
YWHAH1	5.38e-22	0.553488	0.88	0.595	1.06e-17	9	YWHAH	proliferating cells
SAPCD2	3.8e-156	0.550656	0.337	0.015	7.51e-152	9	SAPCD2	proliferating cells
DNAJB1	8.59e-14	0.550429	0.686	0.4	1.7e-09	9	DNAJB1	proliferating cells
MGME11	8.05e-56	0.550309	0.577	0.141	1.59e-51	9	MGME1	proliferating cells
BANF1	2.23e-26	0.549843	0.937	0.802	4.4e-22	9	BANF1	proliferating cells
B2M1	5.98e-28	0.549728	0.954	0.737	1.18e-23	9	B2M	proliferating cells
HIST1H1E	1.59e-46	0.5497	0.457	0.107	3.13e-42	9	HIST1H1E	proliferating cells
SHISA21	7.1e-07	0.549665	0.389	0.229	0.0140264	9	SHISA2	proliferating cells
FAM111A	7.7e-58	0.549322	0.514	0.111	1.52e-53	9	FAM111A	proliferating cells
HMGN5	7.26e-39	0.548675	0.634	0.211	1.43e-34	9	HMGN5	proliferating cells
DEPDC1B	3.02e-118	0.547911	0.469	0.047	5.98e-114	9	DEPDC1B	proliferating cells
COMMD41	8.74e-22	0.547054	0.691	0.336	1.73e-17	9	COMMD4	proliferating cells
RPL39L	9.52e-40	0.541954	0.663	0.229	1.88e-35	9	RPL39L	proliferating cells
HYLS1	8.27e-93	0.539006	0.446	0.056	1.63e-88	9	HYLS1	proliferating cells
PTMA2	5.12e-36	0.53884	1	0.991	1.01e-31	9	PTMA	proliferating cells
CLSPN1	9.73e-55	0.538333	0.423	0.08	1.92e-50	9	CLSPN	proliferating cells
CNTLN	4.27e-26	0.536935	0.703	0.331	8.43e-22	9	CNTLN	proliferating cells
PHIP2	1.18e-18	0.53642	0.8	0.46	2.34e-14	9	PHIP	proliferating cells
ADD3	1.04e-21	0.536146	0.794	0.425	2.06e-17	9	ADD3	proliferating cells
NCAPG2	3.27e-109	0.533735	0.491	0.057	6.46e-105	9	NCAPG2	proliferating cells
MIS18A	5.53e-49	0.533155	0.6	0.167	1.09e-44	9	MIS18A	proliferating cells
CDKN2C	2.36e-118	0.526107	0.354	0.025	4.66e-114	9	CDKN2C	proliferating cells
HADH	3.12e-25	0.525335	0.629	0.267	6.16e-21	9	HADH	proliferating cells
MORF4L2	1.15e-17	0.525086	0.937	0.764	2.27e-13	9	MORF4L2	proliferating cells
EXOSC81	7.28e-26	0.522783	0.737	0.36	1.44e-21	9	EXOSC8	proliferating cells
CNTRL	1.07e-40	0.521704	0.52	0.145	2.11e-36	9	CNTRL	proliferating cells
SNRPB2	1.85e-20	0.520801	0.909	0.645	3.66e-16	9	SNRPB	proliferating cells
HMGXB4	5.44e-21	0.519501	0.651	0.332	1.07e-16	9	HMGXB4	proliferating cells
ECI2	9.34e-24	0.519181	0.811	0.42	1.85e-19	9	ECI2	proliferating cells
DDX39A	5.19e-44	0.519011	0.634	0.192	1.03e-39	9	DDX39A	proliferating cells
NASP2	1.85e-15	0.517897	0.891	0.709	3.66e-11	9	NASP	proliferating cells
BARD1	8.43e-51	0.51645	0.623	0.172	1.67e-46	9	BARD1	proliferating cells
RNF26	6.2e-59	0.512712	0.48	0.097	1.22e-54	9	RNF26	proliferating cells
CCDC14	1.2e-23	0.512691	0.731	0.356	2.37e-19	9	CCDC14	proliferating cells
H2AFJ	4.74e-18	0.512138	0.829	0.499	9.36e-14	9	H2AFJ	proliferating cells
HES12	0.00298216	0.510001	0.669	0.557	1	9	HES1	proliferating cells
PLIN3	1.54e-18	0.50835	0.657	0.34	3.03e-14	9	PLIN3	proliferating cells
CLIC1	2.65e-19	0.508098	0.926	0.691	5.24e-15	9	CLIC1	proliferating cells
HIST1H2BH	2.11e-106	0.507477	0.469	0.052	4.17e-102	9	HIST1H2BH	proliferating cells
HIST1H3B	3.88e-101	0.507236	0.406	0.041	7.67e-97	9	HIST1H3B	proliferating cells
TRIP13	1.97e-116	0.505918	0.469	0.048	3.89e-112	9	TRIP13	proliferating cells
PCNA2	2.08e-20	0.504545	0.617	0.284	4.12e-16	9	PCNA	proliferating cells
EMP2	2.83e-36	0.501616	0.629	0.219	5.59e-32	9	EMP2	proliferating cells
MYF5	0	2.04611	0.903	0.033	0	10	MYF5	periocular connective tissue
USP18	3.8e-30	1.69623	0.255	0.052	7.51e-26	10	USP18	periocular connective tissue
ACTC1	1.11e-45	1.61409	0.764	0.299	2.19e-41	10	ACTC1	periocular connective tissue
NEB	0	1.54997	0.848	0.046	0	10	NEB	periocular connective tissue
SGCA	0	1.46978	0.945	0.038	0	10	SGCA	periocular connective tissue
MYF6	0	1.44335	0.897	0.041	0	10	MYF6	periocular connective tissue
NNAT2	1.62e-77	1.4408	0.97	0.401	3.2e-73	10	NNAT	periocular connective tissue
SMPX	2e-306	1.43226	0.824	0.051	3.96e-302	10	SMPX	periocular connective tissue
MYOG	1.34e-47	1.32544	0.224	0.026	2.65e-43	10	MYOG	periocular connective tissue
CDH15	0	1.30663	0.812	0.034	0	10	CDH15	periocular connective tissue
PPP1R14B1	4e-58	1.28241	0.994	0.684	7.9e-54	10	PPP1R14B	periocular connective tissue
NES	4.14e-102	1.26952	0.885	0.223	8.18e-98	10	NES	periocular connective tissue
DES	2.01e-240	1.15663	0.867	0.078	3.96e-236	10	DES	periocular connective tissue
MSC	3.88e-133	1.15213	0.776	0.122	7.68e-129	10	MSC	periocular connective tissue
SNHG19	5.42e-71	1.14633	0.927	0.375	1.07e-66	10	SNHG19	periocular connective tissue
RAPSN	0	1.12186	0.824	0.034	0	10	RAPSN	periocular connective tissue
C1QTNF3	4.13e-166	1.09601	0.612	0.057	8.16e-162	10	C1QTNF3	periocular connective tissue
EMC10	0.000391939	1.07782	0.606	0.433	1	10	EMC10	periocular connective tissue
FGFR4	0	1.0708	0.782	0.03	0	10	FGFR4	periocular connective tissue
CLCN5	2.19e-156	1.06664	0.794	0.112	4.32e-152	10	CLCN5	periocular connective tissue
GPC31	1.51e-38	1.05564	0.885	0.476	2.99e-34	10	GPC3	periocular connective tissue
AKR1C1	2.2e-112	1.04297	0.648	0.098	4.35e-108	10	AKR1C1	periocular connective tissue
TNNT2	1.38e-133	1.0258	0.558	0.056	2.73e-129	10	TNNT2	periocular connective tissue
CHRNA1	0	1.00851	0.667	0.029	0	10	CHRNA1	periocular connective tissue
NACA	5.77e-96	1.00132	1	0.992	1.14e-91	10	NACA	periocular connective tissue
AL589740.1	0	1.00025	0.673	0.027	0	10	AL589740.1	periocular connective tissue
RPL12	8.46e-92	0.985356	1	0.995	1.67e-87	10	RPL12	periocular connective tissue
RPL29	9.68e-91	0.978357	0.994	0.993	1.91e-86	10	RPL29	periocular connective tissue
AC020909.2	1.46e-59	0.971731	0.194	0.014	2.88e-55	10	AC020909.2	periocular connective tissue
PEG10	2.76e-34	0.970336	0.903	0.578	5.45e-30	10	PEG10	periocular connective tissue
RPL35	4.97e-88	0.966844	1	0.991	9.83e-84	10	RPL35	periocular connective tissue
ZNF106	9.6e-47	0.952115	0.903	0.418	1.9e-42	10	ZNF106	periocular connective tissue
RPL18A	8.78e-92	0.949373	1	0.995	1.74e-87	10	RPL18A	periocular connective tissue
RACK1	8.16e-91	0.945818	1	0.988	1.61e-86	10	RACK1	periocular connective tissue
CCND21	9.94e-49	0.943207	0.988	0.67	1.96e-44	10	CCND2	periocular connective tissue
PDLIM4	3.5e-53	0.942247	0.77	0.267	6.91e-49	10	PDLIM4	periocular connective tissue
RPL36A	1.6e-71	0.930399	1	0.958	3.16e-67	10	RPL36A	periocular connective tissue
AKR1B1	5.03e-64	0.925713	0.915	0.369	9.94e-60	10	AKR1B1	periocular connective tissue
EEF1B2	1.61e-66	0.898613	0.994	0.934	3.18e-62	10	EEF1B2	periocular connective tissue
RSL1D1	8.81e-46	0.896869	0.982	0.612	1.74e-41	10	RSL1D1	periocular connective tissue
RPS18	2.77e-92	0.896386	1	0.999	5.48e-88	10	RPS18	periocular connective tissue
CFH	4.51e-184	0.895757	0.752	0.078	8.91e-180	10	CFH	periocular connective tissue
RPS16	2.17e-90	0.880491	1	0.99	4.3e-86	10	RPS16	periocular connective tissue
RPS2	4.33e-87	0.875547	1	0.998	8.56e-83	10	RPS2	periocular connective tissue
RPL4	5.26e-79	0.873612	1	0.971	1.04e-74	10	RPL4	periocular connective tissue
NPM1	1.03e-73	0.872468	0.994	0.962	2.03e-69	10	NPM1	periocular connective tissue
MRLN	9.24e-173	0.865634	0.558	0.042	1.83e-168	10	MRLN	periocular connective tissue
RPS6	1.06e-88	0.857421	1	0.998	2.1e-84	10	RPS6	periocular connective tissue
HSPB1	3.24e-48	0.853985	0.982	0.779	6.4e-44	10	HSPB1	periocular connective tissue
MYC	8.89e-57	0.846171	0.624	0.164	1.76e-52	10	MYC	periocular connective tissue
RPL19	7.3e-93	0.841842	1	0.995	1.44e-88	10	RPL19	periocular connective tissue
CDK6	4.74e-52	0.83467	0.939	0.404	9.38e-48	10	CDK6	periocular connective tissue
SLF2	5.38e-67	0.833616	0.685	0.176	1.06e-62	10	SLF2	periocular connective tissue
HEY12	8.71e-72	0.829361	0.679	0.153	1.72e-67	10	HEY1	periocular connective tissue
TMEM1231	9.36e-72	0.82478	0.842	0.246	1.85e-67	10	TMEM123	periocular connective tissue
NRK	4.79e-128	0.820409	0.745	0.106	9.46e-124	10	NRK	periocular connective tissue
ZFAS1	3.16e-52	0.80025	0.988	0.942	6.24e-48	10	ZFAS1	periocular connective tissue
ODC12	2.55e-39	0.791627	0.945	0.551	5.03e-35	10	ODC1	periocular connective tissue
RPL36	1.12e-79	0.785556	1	0.995	2.21e-75	10	RPL36	periocular connective tissue
RPL26	4.27e-84	0.781453	1	0.997	8.45e-80	10	RPL26	periocular connective tissue
BTF3	9.87e-65	0.779985	0.994	0.962	1.95e-60	10	BTF3	periocular connective tissue
CCNG2	2.4e-50	0.769442	0.812	0.317	4.74e-46	10	CCNG2	periocular connective tissue
FAH	2.82e-76	0.768458	0.503	0.082	5.57e-72	10	FAH	periocular connective tissue
RPLP0	1.92e-77	0.767518	1	0.992	3.79e-73	10	RPLP0	periocular connective tissue
RPS5	1.4e-78	0.765139	0.994	0.988	2.76e-74	10	RPS5	periocular connective tissue
RPS12	1.68e-83	0.764456	1	1	3.31e-79	10	RPS12	periocular connective tissue
NAP1L11	7.33e-47	0.752373	1	0.917	1.45e-42	10	NAP1L1	periocular connective tissue
YBX3	4.08e-39	0.749196	0.933	0.526	8.07e-35	10	YBX3	periocular connective tissue
PAX7	0	0.737936	0.552	0.017	0	10	PAX7	periocular connective tissue
PFN1	2.49e-23	0.732125	0.97	0.793	4.93e-19	10	PFN1	periocular connective tissue
RPS17	1.78e-39	0.729689	0.988	0.771	3.52e-35	10	RPS17	periocular connective tissue
TTN	0.00117544	0.729148	0.158	0.084	1	10	TTN	periocular connective tissue
RPS3	8.37e-81	0.724782	1	0.996	1.65e-76	10	RPS3	periocular connective tissue
CDKN1C	8.18e-19	0.722827	0.97	0.744	1.62e-14	10	CDKN1C	periocular connective tissue
OLA1	5.11e-39	0.720729	0.903	0.478	1.01e-34	10	OLA1	periocular connective tissue
SPATS2L2	2.59e-33	0.720093	0.976	0.627	5.12e-29	10	SPATS2L	periocular connective tissue
TNC	2.37e-108	0.717145	0.6	0.082	4.69e-104	10	TNC	periocular connective tissue
HNRNPA1	7.31e-59	0.717	1	0.968	1.44e-54	10	HNRNPA1	periocular connective tissue
PPA12	2.11e-35	0.716293	0.958	0.511	4.18e-31	10	PPA1	periocular connective tissue
SLC25A6	1.47e-43	0.713323	0.994	0.923	2.9e-39	10	SLC25A6	periocular connective tissue
RPL7A	2.96e-84	0.705668	1	0.997	5.86e-80	10	RPL7A	periocular connective tissue
EEF1D	2.13e-47	0.7007	0.994	0.926	4.22e-43	10	EEF1D	periocular connective tissue
RPL13	2.01e-82	0.696112	1	0.999	3.97e-78	10	RPL13	periocular connective tissue
NKAIN42	1.1e-67	0.695468	0.873	0.247	2.18e-63	10	NKAIN4	periocular connective tissue
MPPED2	7.8e-54	0.694411	0.77	0.246	1.54e-49	10	MPPED2	periocular connective tissue
TNNT1	8.44e-61	0.691968	0.612	0.152	1.67e-56	10	TNNT1	periocular connective tissue
RPL14	2.68e-80	0.691929	1	0.993	5.3e-76	10	RPL14	periocular connective tissue
AKR1C2	6.69e-73	0.686036	0.436	0.065	1.32e-68	10	AKR1C2	periocular connective tissue
VGLL3	4.5e-114	0.685671	0.618	0.082	8.9e-110	10	VGLL3	periocular connective tissue
LIX1	1.78e-77	0.685022	0.412	0.054	3.52e-73	10	LIX1	periocular connective tissue
LGI2	1.81e-177	0.683109	0.564	0.043	3.57e-173	10	LGI2	periocular connective tissue
RPL7	4.1e-76	0.679422	1	0.994	8.1e-72	10	RPL7	periocular connective tissue
TPM2	1.23e-40	0.678628	0.988	0.709	2.42e-36	10	TPM2	periocular connective tissue
RPS15	5.91e-79	0.676531	1	0.997	1.17e-74	10	RPS15	periocular connective tissue
PDLIM3	2.01e-38	0.673279	0.485	0.13	3.98e-34	10	PDLIM3	periocular connective tissue
RPSA	2.05e-70	0.666578	1	0.984	4.06e-66	10	RPSA	periocular connective tissue
RPL39	1.34e-76	0.65897	1	0.998	2.65e-72	10	RPL39	periocular connective tissue
RPL23	9.39e-60	0.657252	1	0.985	1.86e-55	10	RPL23	periocular connective tissue
RPL3	1.35e-78	0.654603	1	0.996	2.67e-74	10	RPL3	periocular connective tissue
PABPC1	1.87e-34	0.653398	0.994	0.853	3.69e-30	10	PABPC1	periocular connective tissue
RPL37A	1.27e-80	0.652838	1	1	2.51e-76	10	RPL37A	periocular connective tissue
RPS8	2.84e-78	0.652201	1	0.999	5.62e-74	10	RPS8	periocular connective tissue
RPL5	8.9e-76	0.648828	1	0.995	1.76e-71	10	RPL5	periocular connective tissue
LDHB	1.55e-41	0.645997	0.994	0.912	3.05e-37	10	LDHB	periocular connective tissue
RPLP1	1.43e-75	0.643453	1	1	2.83e-71	10	RPLP1	periocular connective tissue
RPS19	1.25e-77	0.641094	1	0.999	2.48e-73	10	RPS19	periocular connective tissue
CELF21	9e-37	0.635364	0.703	0.249	1.78e-32	10	CELF2	periocular connective tissue
RPS25	1.35e-70	0.634157	1	0.993	2.66e-66	10	RPS25	periocular connective tissue
EIF3E	2.05e-40	0.632104	1	0.928	4.04e-36	10	EIF3E	periocular connective tissue
RPL6	1.27e-75	0.631761	1	0.995	2.51e-71	10	RPL6	periocular connective tissue
BMPR1B	4.19e-98	0.63166	0.527	0.07	8.28e-94	10	BMPR1B	periocular connective tissue
RPS4X	5.32e-67	0.631331	1	0.995	1.05e-62	10	RPS4X	periocular connective tissue
MSTN	3.67e-73	0.628152	0.364	0.044	7.25e-69	10	MSTN	periocular connective tissue
RPL10A	9.7e-65	0.625561	0.994	0.992	1.92e-60	10	RPL10A	periocular connective tissue
FBL	4.01e-28	0.62262	0.921	0.575	7.92e-24	10	FBL	periocular connective tissue
MYOD1	2.35e-159	0.621039	0.339	0.014	4.65e-155	10	MYOD1	periocular connective tissue
HNRNPA1P48	2.2e-32	0.61868	0.945	0.568	4.35e-28	10	HNRNPA1P48	periocular connective tissue
MYL4	7.01e-90	0.617093	0.648	0.113	1.39e-85	10	MYL4	periocular connective tissue
RPL32	5.86e-77	0.606619	1	0.999	1.16e-72	10	RPL32	periocular connective tissue
RPL22	4.88e-67	0.606126	1	0.99	9.65e-63	10	RPL22	periocular connective tissue
RPS3A	4.51e-74	0.603632	1	0.999	8.92e-70	10	RPS3A	periocular connective tissue
EIF3M	5.08e-31	0.598898	0.982	0.763	1e-26	10	EIF3M	periocular connective tissue
PSAT1	8.3e-55	0.597078	0.648	0.175	1.64e-50	10	PSAT1	periocular connective tissue
SPRY11	1.37e-30	0.596035	0.855	0.395	2.7e-26	10	SPRY1	periocular connective tissue
STK26	4.58e-132	0.593563	0.545	0.055	9.05e-128	10	STK26	periocular connective tissue
PITX13	4.61e-31	0.590068	0.848	0.356	9.12e-27	10	PITX1	periocular connective tissue
ENO12	3.05e-30	0.589756	0.994	0.686	6.02e-26	10	ENO1	periocular connective tissue
GABPB1-AS1	1.25e-23	0.589379	0.873	0.535	2.47e-19	10	GABPB1-AS1	periocular connective tissue
EIF3L	4.79e-29	0.588241	0.988	0.821	9.46e-25	10	EIF3L	periocular connective tissue
MEGF10	1.18e-70	0.588028	0.448	0.07	2.33e-66	10	MEGF10	periocular connective tissue
RPS23	4.16e-75	0.58597	1	0.999	8.21e-71	10	RPS23	periocular connective tissue
RPS13	2.8e-67	0.585142	1	0.994	5.54e-63	10	RPS13	periocular connective tissue
RPS14	6.45e-72	0.579198	1	0.999	1.27e-67	10	RPS14	periocular connective tissue
RPS7	1.38e-66	0.577989	1	0.995	2.72e-62	10	RPS7	periocular connective tissue
TAF1D	3.49e-27	0.575696	0.921	0.554	6.9e-23	10	TAF1D	periocular connective tissue
RPL13A	2.65e-68	0.574056	1	0.998	5.23e-64	10	RPL13A	periocular connective tissue
RPS28	8.2e-64	0.572598	1	0.996	1.62e-59	10	RPS28	periocular connective tissue
PALMD	1.12e-72	0.570299	0.394	0.052	2.22e-68	10	PALMD	periocular connective tissue
JSRP1	1.36e-212	0.568596	0.473	0.021	2.68e-208	10	JSRP1	periocular connective tissue
RPL18	7.87e-68	0.56735	1	0.995	1.56e-63	10	RPL18	periocular connective tissue
RPS15A	3.65e-68	0.564482	1	0.998	7.22e-64	10	RPS15A	periocular connective tissue
HSP90AB1	3.34e-40	0.562748	0.994	0.97	6.59e-36	10	HSP90AB1	periocular connective tissue
RPL31	5.81e-47	0.56064	1	0.979	1.15e-42	10	RPL31	periocular connective tissue
RPL23A	8.14e-64	0.560545	1	0.998	1.61e-59	10	RPL23A	periocular connective tissue
CITED1	4.65e-84	0.555899	0.576	0.093	9.19e-80	10	CITED1	periocular connective tissue
RPS4Y1	1.28e-31	0.555195	1	0.934	2.53e-27	10	RPS4Y1	periocular connective tissue
RPS24	1.09e-71	0.554892	1	0.999	2.15e-67	10	RPS24	periocular connective tissue
RPL22L1	2.87e-21	0.551475	0.97	0.729	5.67e-17	10	RPL22L1	periocular connective tissue
FITM1	9.87e-123	0.547883	0.352	0.022	1.95e-118	10	FITM1	periocular connective tissue
IMPDH2	4.49e-26	0.545399	0.964	0.612	8.88e-22	10	IMPDH2	periocular connective tissue
APEX11	2.99e-24	0.542656	0.976	0.731	5.92e-20	10	APEX1	periocular connective tissue
RPS21	6.47e-60	0.540755	1	0.99	1.28e-55	10	RPS21	periocular connective tissue
RPL27A	3.3e-58	0.539631	1	0.994	6.53e-54	10	RPL27A	periocular connective tissue
RPL28	5.86e-62	0.537221	1	0.996	1.16e-57	10	RPL28	periocular connective tissue
RPL11	1.21e-63	0.537108	1	0.999	2.39e-59	10	RPL11	periocular connective tissue
[truncated: 2,568 more rows]

## Sheet: PCW8_15278
15278; 8 PCW; Full Eye
	p_val	avg_log2FC	pct.1	pct.2	p_val_adj	cluster	gene	cell fate
OGN	0	3.06661	0.927	0.315	0	0	OGN	periocular mesenchyme
ASPN	8.55e-276	2.11176	0.521	0.089	1.64e-271	0	ASPN	periocular mesenchyme
MGP	0	2.06683	0.943	0.39	0	0	MGP	periocular mesenchyme
DCN	1.4e-227	1.98335	0.955	0.741	2.67e-223	0	DCN	periocular mesenchyme
CTHRC1	0	1.91689	0.854	0.298	0	0	CTHRC1	periocular mesenchyme
S100A10	5.41e-275	1.86178	0.91	0.449	1.03e-270	0	S100A10	periocular mesenchyme
PENK	3.76e-33	1.7882	0.359	0.21	7.2e-29	0	PENK	periocular mesenchyme
SULT1E1	3.18e-266	1.71838	0.586	0.124	6.09e-262	0	SULT1E1	periocular mesenchyme
COL3A1	7.08e-299	1.6885	0.999	0.778	1.36e-294	0	COL3A1	periocular mesenchyme
PTN	4.5e-219	1.61523	0.892	0.483	8.62e-215	0	PTN	periocular mesenchyme
S100A11	0	1.60898	0.982	0.611	0	0	S100A11	periocular mesenchyme
FOXC1	0	1.59581	0.765	0.154	0	0	FOXC1	periocular mesenchyme
SPARC	0	1.57475	0.998	0.768	0	0	SPARC	periocular mesenchyme
COL1A1	3.14e-257	1.53624	1	0.893	6e-253	0	COL1A1	periocular mesenchyme
TM4SF1	0	1.52553	0.54	0.056	0	0	TM4SF1	periocular mesenchyme
COL12A1	2.11e-201	1.51834	0.864	0.498	4.04e-197	0	COL12A1	periocular mesenchyme
COL1A2	3.31e-276	1.50771	1	0.886	6.34e-272	0	COL1A2	periocular mesenchyme
PCOLCE	8.44e-267	1.47544	0.925	0.492	1.62e-262	0	PCOLCE	periocular mesenchyme
PLAC9	1.57e-208	1.40771	0.959	0.621	3e-204	0	PLAC9	periocular mesenchyme
FSTL1	2.45e-198	1.37446	0.925	0.597	4.7e-194	0	FSTL1	periocular mesenchyme
C2orf40	1.81e-231	1.35376	0.795	0.335	3.46e-227	0	C2orf40	periocular mesenchyme
EGFL6	1.3e-227	1.28879	0.801	0.306	2.48e-223	0	EGFL6	periocular mesenchyme
TSC22D1	2.8e-91	1.25206	0.812	0.682	5.35e-87	0	TSC22D1	periocular mesenchyme
NRP2	2.22e-179	1.21382	0.745	0.332	4.25e-175	0	NRP2	periocular mesenchyme
COL9A3	1.12e-253	1.19605	0.573	0.121	2.15e-249	0	COL9A3	periocular mesenchyme
PRSS35	5.27e-241	1.1881	0.713	0.215	1.01e-236	0	PRSS35	periocular mesenchyme
LTBP1	7.43e-204	1.16719	0.706	0.276	1.42e-199	0	LTBP1	periocular mesenchyme
PITX1	1.72e-302	1.1354	0.611	0.107	3.29e-298	0	PITX1	periocular mesenchyme
ITM2A	4.66e-130	1.10637	0.863	0.506	8.92e-126	0	ITM2A	periocular mesenchyme
AKAP12	2.89e-119	1.08876	0.869	0.609	5.53e-115	0	AKAP12	periocular mesenchyme
COL8A2	1.08e-269	1.07095	0.603	0.126	2.07e-265	0	COL8A2	periocular mesenchyme
COL11A1	3.72e-155	1.07016	0.642	0.265	7.12e-151	0	COL11A1	periocular mesenchyme
IGFBP6	2e-96	1.05262	0.597	0.285	3.82e-92	0	IGFBP6	periocular mesenchyme
[truncated: 5,425 more rows]

## Sheet: PCW8_15220
15220; 8 PCW; Full Eye
[truncated: 4,862 more rows]

## Sheet: PCW8.5_15189.1
15189.1; 8.5 PCW; Full Eye
[truncated: 6,435 more rows]

## Sheet: PCW8.5_15189.2
15189.2; 8.5 PCW; Full Eye
[truncated: 6,479 more rows]

[truncated: 18 more sheets: PCW10_14601.fixed, PCW10_14601, PCW10_14849, PCW10_232020, PCW12_14680, PCW14_08102020, PCW15_14611, PCW16_14713.1, PCW16_14713.2, PCW16_15232, PCW16_14149.1, PCW16_14149.2, PCW17_15221, PCW18_15700, PCW20_14556, PCW20_15183, PCW21_15184, Sheet1]
